# Supplementary material for: SARS-CoV-2 putative mi-RNAs may target host immune system and cellular mechanisms to mediate pathogenesis-an in silico and in vivo study
Source: Research Square preprint supplement (doi:10.21203/rs.3.rs-6526890/v1), 2025-05-09
Supplement: Supplementary file 1 [file 004710234044092bce001990.xlsx]

## Sheet: Hairpin
S.N.	Sequence ID	Sequence	Location in genome	MFE
1	>FJ882951.1_1	UUUAAAAUCUGUGUAGCUGUCGCUCGGCUGCAUGCCUAGUGCACCUACGCAGUAUAAA	65-122	-22.2
2	>FJ882951.1_2	AGCUGUCGCUCGGCUGCAUGCCUAGUGCACCUACGCAGUAUAAACAAUAAUAAAUUUUACUGUCGUUGACAAGAAACGAGUAACUCGUCCCUCUUCUGCAGACUGCUUACGGUU	79-192	-28.3
3	>FJ882951.1_3	UGCACCUACGCAGUAUAAACAAUAAUAAAUUUUACUGUCGUUGACAAGAAACGAGUAACUCGUCCCUCUUCUGCAGACUGCUUACGGUUUCGUCCGUGUUGCA	104-206	-25.1		Hairpins	577
4	>FJ882951.1_4	ACUCGUCCCUCUUCUGCAGACUGCUUACGGUUUCGUCCGUGUUGCAGUCGAUCAUCAGCAUACCUAGGUUUCGUCCGGGU	161-240	-28.8		hairpins ≤20 kj/mol	439
5	>FJ882951.1_5	AUACCUAGGUUUCGUCCGGGUGUGACCGAAAGGUAAGAUGGAGAGCCUUGUUCUUGGUGU	220-279	-18.6		hairpins ≥20 kj/mol	138
6	>FJ882951.1_6	UUUCGUCCGGGUGUGACCGAAAGGUAAGAUGGAGAGCCUUGUUCUUGGUGUCAACGAGA	229-287	-17.4
7	>FJ882951.1_7	GCCUUGUUCUUGGUGUCAACGAGAAAACACACGUCCAACUCAGUUUGCCUGUCCUUCAGGUUAGAGACGUGCUAGUGCGUGGCUUCGGGGACUCUGUGGAAGAGGC	264-369	-34.2
8	>FJ882951.1_8	GUCCUUCAGGUUAGAGACGUGCUAGUGCGUGGCUUCGGGGACUCUGUGGAAGAGGCCCUAUCGGAGGCACGUGAACACCUCAAAAAUGGC	314-403	-28.5
9	>FJ882951.1_9	GAGGCACGUGAACACCUCAAAAAUGGCACUUGUGGUCUAGUAGAGCUGGAAAAAGGCGUACUGCCCCAGCUUGAACAGCCCUAUGUGUUCAUUAAACGUUCUGAUGCCUU	377-486	-37.1
10	>FJ882951.1_10	UAUCGGAGGCACGUGAACACCUCAAAAAUGGCACUUGUGGUCUAGUAGAGCUGGAAAAAGGCGUACUGCCCCAGCUUGAACAGCCCUAUGUGUUCAUUAAACGUUCUGAUG	372-482	-37.7
11	>FJ882951.1_11	CUUGUGGUCUAGUAGAGCUGGAAAAAGGCGUACUGCCCCAGCUUGAACAGCCCUAUGUGUUCAUUAAACGUUCUGAUGCCUUAAGCACCAAUCACGGCCACAAG	405-508	-34.2
12	>FJ882951.1_12	CCAGCUUGAACAGCCCUAUGUGUUCAUUAAACGUUCUGAUGCCUUAAGCACCAAUCACGGCCACAAGGUCGUUGAGCUGG	442-521	-29.6
13	>FJ882951.1_13	UUAAGCACCAAUCACGGCCACAAGGUCGUUGAGCUGGUUGCAGAAAUGGACGGCAUUCAGUACGGUCGUAGCGGUAUAA	485-563	-23.9
14	>FJ882951.1_14	UACGGUCGUAGCGGUAUAACACUGGGAGUACUCGUGCCACAUGUGGGCGAAACCCCAAUUGCAUACCGCAAUGUUCUUCUUCGUA	545-629	-32.8
15	>FJ882951.1_15	UCGUGCCACAUGUGGGCGAAACCCCAAUUGCAUACCGCAAUGUUCUUCUUCGUAAGAACGGUAAUAAGGGAGCCGGUGGUCAUAGCUAUGGCAUCGAUCUAAAGUCUUAUGA	576-687	-28.9
16	>FJ882951.1_16	CAAUGUUCUUCUUCGUAAGAACGGUAAUAAGGGAGCCGGUGGUCAUAGCUAUGGCAUCGAUCUAAAGUCUUAUGACUUAGGUGACGAGCUUGGCACUG	613-710	-26.6
17	>FJ882951.1_17	AGGGAGCCGGUGGUCAUAGCUAUGGCAUCGAUCUAAAGUCUUAUGACUUAGGUGACGAGCUUGGCACUGAUCCCAUUGAAGAUUAUGAACAAAACUGGAACACU	642-745	-30.6
18	>FJ882951.1_18	GGUGACGAGCUUGGCACUGAUCCCAUUGAAGAUUAUGAACAAAACUGGAACACUAAGCAUGGCAGUGGUGCACUCCGUGAACUCACUCGUGAGCUCAAUGGAGGUGCAGUCACU	692-805	-40.8
19	>FJ882951.1_19	GCAUGGCAGUGGUGCACUCCGUGAACUCACUCGUGAGCUCAAUGGAGGUGCAGUCACUCGCUAUGU	748-813	-30.2
20	>FJ882951.1_20	CUCGUGAGCUCAAUGGAGGUGCAGUCACUCGCUAUGUCGACAACAAUUUCUGUGGCCCAGAUGGGUACCCUCUUGAUUGCAUCAAAG	777-863	-24.2
21	>FJ882951.1_21	GGUGCAGUCACUCGCUAUGUCGACAACAAUUUCUGUGGCCCAGAUGGGUACCCUCUUGAUUGCAUCAAAGAUUUUCUCGCACGCGCGGGCAAGUCAAUGUGCACU	794-898	-30.7
22	>FJ882951.1_22	CGCGCGGGCAAGUCAAUGUGCACUCUUUCCGAACAACUUGAUUACAUCGAGUCGAAGAGAGGUGUCUACUGCUGCCGUG	875-953	-26.4
23	>FJ882951.1_23	GAGUCGAAGAGAGGUGUCUACUGCUGCCGUGACCAUGAGCAUGAAAUUGCCUGGUUCACUGAGCGCUCUGAUAAGAGCUACGAGCACCAGACACCCUUCGAAAUU	923-1027	-32.2
24	>FJ882951.1_24	UGAAAUUGCCUGGUUCACUGAGCGCUCUGAUAAGAGCUACGAGCACCAGACACCCUUCGAAAUUAAGAGUGCCAAGAAAUUUGACACUUUCA	964-1055	-26.1
25	>FJ882951.1_25	UCGAAAUUAAGAGUGCCAAGAAAUUUGACACUUUCAAAGGGGAAUGCCCAAAGUUUGUGUUUCCUCUUAACUCAAAAGUCAAAGUCAUUCAACCACGUGUUGA	1020-1122	-23.7
26	>FJ882951.1_26	ACACUUUCAAAGGGGAAUGCCCAAAGUUUGUGUUUCCUCUUAACUCAAAAGUCAAAGUCAUUCAACCACGUGUUGAAAAGAAAAAGACUGAGGGUUUCAUGGGGCGU	1047-1153	-25.3
27	>FJ882951.1_27	AGACUGAGGGUUUCAUGGGGCGUAUACGCUCUGUGUACCCUGUUGCAUCU	1131-1180	-12.8
28	>FJ882951.1_28	UGAGGGUUUCAUGGGGCGUAUACGCUCUGUGUACCCUGUUGCAUCUCCACAGGAGUGUAACAAUAUGCACUUGUCUACCUUGAUGAAAUGUAAUCA	1135-1230	-27.5
29	>FJ882951.1_29	AGUGUAACAAUAUGCACUUGUCUACCUUGAUGAAAUGUAAUCAUUGCGAUGAAGUUUCAUGGCAGACGUGCGACUUUCUGAAAGCCACUUGUGAACAUUGUGGCACU	1188-1294	-29.5
30	>FJ882951.1_30	UGGCACUGAAAAUUUAGUUAUUGAAGGACCUACUACAUGUGGGUACCUACCUACUAAUGCUGUAGUGAAAAUGCCA	1288-1363	-22.1
31	>FJ882951.1_31	AGGACCUACUACAUGUGGGUACCUACCUACUAAUGCUGUAGUGAAAAUGCCAUGUCCU	1312-1369	-17.7
32	>FJ882951.1_32	AGCAUAGUGUUGCAGAUUAUCACAACCACUCAAACAUUGAAACUCGACUCCGCAAGGGAGGUAGGACUAGAUGUUUUGGAGGCUGUGUGUUUGCCUAUGUU	1398-1498	-36.6
33	>FJ882951.1_33	GUGCCUACUGGGUUCCUCGUGCUAGUGCUGAUAUUGGCUCAGGACAUACUGGAAUUACUGGUGACAAUGUGGAGACCUUGAAUGAGGAUCUCCUUGAGAUAC	1515-1616	-32
34	>FJ882951.1_34	CAAUGUGGAGACCUUGAAUGAGGAUCUCCUUGAGAUACUGAGUCGUGAACGUGUUAACAUUAACAUUGUUGGCGAUUUUCAUUUGAAUGAAGAGGUUGCCAUCAUUUUG	1579-1687	-32.1
35	>FJ882951.1_35	GGAGACCUUGAAUGAGGAUCUCCUUGAGAUACUGAGUCGUGAACGUGUUAACAUUAACAUUGUUGGCGAUUUUCAUUUGAAUGAAGAGGUUGCCAUCAUUUUGGCAUCUUU	1585-1695	-34.2
36	>FJ882951.1_36	GUCUUGAUUACAAGUCUUUCAAAACCAUUGUUGAGUCCUGCGGUAACUAUAAAGUUACCAAGGGAAAGCCCGUAAAAGGUGCUUGGAACAUUGGAC	1734-1829	-28.3
37	>FJ882951.1_37	GGUAACUAUAAAGUUACCAAGGGAAAGCCCGUAAAAGGUGCUUGGAACAUUGGACAACAGAGAUCAGUUUUAACACCACUGUGUGGUUUUCCCUCACAGGCUGCUGGUGUUAUC	1775-1888	-38.9
38	>FJ882951.1_38	GGCUGCUGGUGUUAUCAGAUCAAUUUUUGCGCGCACACUUGAUGCAGCAAACCACUCAAUUCCUGAUUUGCAAAGAGCAGCU	1873-1954	-27.5
39	>FJ882951.1_39	UUGCAAAGAGCAGCUGUCACCAUACUUGAUGGUAUUUCUGAACAGUCAUUACGUCUUGUCGA	1940-2001	-14.6
40	>FJ882951.1_40	GCUGUCACCAUACUUGAUGGUAUUUCUGAACAGUCAUUACGUCUUGUCGACGCCAUGGUUUAUACUUCAGACCUGCUCACCAACAGU	1952-2038	-21.9
41	>FJ882951.1_41	UGUCACCAUACUUGAUGGUAUUUCUGAACAGUCAUUACGUCUUGUCGACGCCAUGGUUUAUACUUCAGACCUGCUCACCAACAGUGUCAUUAUUAUGGCAUA	1954-2055	-25.3
42	>FJ882951.1_42	UAUACUUCAGACCUGCUCACCAACAGUGUCAUUAUUAUGGCAUAUGUAACUGGUGGUCUUGUA	2012-2074	-14.6
43	>FJ882951.1_43	CAACAGUGUCAUUAUUAUGGCAUAUGUAACUGGUGGUCUUGUACAACAGACUUCUCAGUGGUUGUCUAAUCUUUUGGGCACUACUGUUG	2032-2120	-27.9
44	>FJ882951.1_44	GGUGGUCUUGUACAACAGACUUCUCAGUGGUUGUCUAAUCUUUUGGGCACUACUGUUGAAAAACUCAGGCCUAUCU	2063-2138	-21.8
45	>FJ882951.1_45	UUCUCAGUGGUUGUCUAAUCUUUUGGGCACUACUGUUGAAAAACUCAGGCCUAUCUUUGAAUGGAUUGAGGCGAAACUUAGUGCAGGAGUUGAAUUUCUCAAGGAUGCUUGGGAG	2083-2197	-27.6
46	>FJ882951.1_46	UGGGCACUACUGUUGAAAAACUCAGGCCUAUCUUUGAAUGGAUUGAGGCGAAACUUAGUGCAGGAGUUGAAUUUCUCAAGGAUGCUUGGGAGAUUCUCAAAUUUCUCA	2106-2213	-27.2
47	>FJ882951.1_47	CUGUUGAAAAACUCAGGCCUAUCUUUGAAUGGAUUGAGGCGAAACUUAGUGCAGGAGUUGAAUUUCUCAAGGAUGCUUGGGAGAUUCUCAAAUUUCUCAUUACAG	2115-2219	-25
48	>FJ882951.1_48	UUGAAUUUCUCAAGGAUGCUUGGGAGAUUCUCAAAUUUCUCAUUACAGGUGUUUUUGACAUCGUCAAGGGUCAA	2172-2245	-17.2
49	>FJ882951.1_49	CAUUACAGGUGUUUUUGACAUCGUCAAGGGUCAAAUACAGGUUGCUUCAGAUAACAUCAAGGAUUGUGUAAAAUGCUUCAUUGAUGUUGUUAACAAGGCACUCGAAAUG	2212-2320	-29.6
50	>FJ882951.1_50	GUCAAGGGUCAAAUACAGGUUGCUUCAGAUAACAUCAAGGAUUGUGUAAAAUGCUUCAUUGAUGUUGUUAACAAGGCACUCGAAAUGUGCAUUGAUCAAGUCAC	2234-2337	-30.7
51	>FJ882951.1_51	GUAAAAUGCUUCAUUGAUGUUGUUAACAAGGCACUCGAAAUGUGCAUUGAUCAAGUCACUAUCGCUGGCGCAAAGUUGCGAUCACUCAACUUAUGUGAAGUCUUCAU	2279-2385	-29.4
52	>FJ882951.1_52	GUGCAUUGAUCAAGUCACUAUCGCUGGCGCAAAGUUGCGAUCACUCAACUUAUGUGAAGUCUUCAUCGCUCAAAGCAAGGGACUUUACCGUCAGUGUAU	2320-2418	-26.6
53	>FJ882951.1_53	AUCGCUCAAAGCAAGGGACUUUACCGUCAGUGUAUACGUGGCAAGGAGCAGCUGCAACUACUCAUGCCUCUUAAGGCACCAAAAGAAGUAACCUUUCUUGAAGGUGAU	2384-2491	-37.9
54	>FJ882951.1_54	GCCUCUUAAGGCACCAAAAGAAGUAACCUUUCUUGAAGGUGAUUCACAUGACACAGUACUUACCUCUGAGGAGGU	2449-2523	-20.8
55	>FJ882951.1_55	UCUCAAGAACGGUGAACUCGAAGCACUCGAGACGCCCGUUGAUAGCUUCACAAAUGGAGCUAUCGUUGGCACACCAGUCUGUGUAAAUGGCCUCAUGCUCUUAGAGA	2527-2633	-40.1
56	>FJ882951.1_56	UGGCCUCAUGCUCUUAGAGAUUAAGGACAAAGAACAAUACUGCGCAUUGUCUCCUGGUUUACUGGCUA	2614-2681	-17.1
57	>FJ882951.1_57	UGCGCAUUGUCUCCUGGUUUACUGGCUACAAACAAUGUCUUUCGCUUAAAAGGGGGUGCA	2654-2713	-15.4
58	>FJ882951.1_58	GGCUACAAACAAUGUCUUUCGCUUAAAAGGGGGUGCACCAAUUAAAGGUGUAACCUUUGGAGAAGAUACUGUUUGGGAAGUU	2677-2758	-29.3
59	>FJ882951.1_59	UGGAGAAGAUACUGUUUGGGAAGUUCAAGGUUACAAGAAUGUGAGAAUCACAUUUGAGCUUGAUGAACGUGUUGACAAAGUGCUUAAUGAAAAGUGCUCUGUCUA	2734-2838	-24.9
60	>FJ882951.1_60	GUUGACAAAGUGCUUAAUGAAAAGUGCUCUGUCUACACUGUUGAAUCCGGUACCGAAGUUACUGAGUUUGCAUGUGUUGUAGCAGAGGCUGUUGUGAAGACUUUACAAC	2804-2912	-30.5
61	>FJ882951.1_61	GUGAAGACUUUACAACCAGUUUCUGAUCUCCUUACCAACAUGGGUAUUGAUCUUGAUGAGUGGAGUGUAGCUAC	2897-2970	-16.8
62	>FJ882951.1_62	UGGAGUGUAGCUACAUUCUACUUAUUUGAUGAUGCUGGUGAAGAAAACUUUUCAUCACGUAUGUAUUGUUCCUUUUACCCUCCA	2957-3040	-29.7
63	>FJ882951.1_63	GGUGAAGAAAACUUUUCAUCACGUAUGUAUUGUUCCUUUUACCCUCCAGAUGAGGAAGAAGAGGACGAUGCAGAGUGUGAGGAAGAAGAAAUUGAUGAAACC	2993-3094	-36.3
64	>FJ882951.1_64	GAGGACGAUGCAGAGUGUGAGGAAGAAGAAAUUGAUGAAACCUGUGAACAUGAGUACGGUACAGAGGAUGAUUAUCAAGGUCUCCCUCUGGAAUUUGGUGCCUC	3053-3156	-28
65	>FJ882951.1_65	CGGUACAGAGGAUGAUUAUCAAGGUCUCCCUCUGGAAUUUGGUGCCUCAGCUGAAACAGUUCGAGUUGAGGAAGAAGAAGAGGAAGACUGGCUGGAUGAUACUACUG	3109-3215	-34.8
66	>FJ882951.1_66	AGCAAUCAGAGAUUGAGCCAGAACCAGAACCUACACCUGAAGAACCAGUUAAUCAGUUUACUGGUUAUUUAAAACUUACUGACAAUGUU	3216-3304	-21.2
67	>FJ882951.1_67	CCUACACCUGAAGAACCAGUUAAUCAGUUUACUGGUUAUUUAAAACUUACUGACAAUGUUGCCAUUAAAUGUGUUGACAUCGUUAAGGAGG	3245-3335	-22.5
68	>FJ882951.1_68	GCACAAAGUGCUAAUCCUAUGGUGAUUGUAAAUGCUGCUAACAUACACCUGAAACAUGGUGGUGGUGUAGCAGGUGCACUCAACAAGGCAACCAAUGGUGC	3335-3435	-37
69	>FJ882951.1_69	CAUGCAAAAGGAGAGUGAUGAUUACAUUAAGCUAAAUGGCCCUCUUACAGUAGGAGGGUCUUGUUUGCUUUCUGGACAUAAUCUUGCUAAGAAGUGUCUGCAUG	3436-3539	-33.4
70	>FJ882951.1_70	CUGGACAUAAUCUUGCUAAGAAGUGUCUGCAUGUUGUUGGACCUAACCUAAAUGCAGGUGAGGACAUCCAGCUUCUUAAGGCAG	3507-3590	-22.4
71	>FJ882951.1_71	CAUAAUCUUGCUAAGAAGUGUCUGCAUGUUGUUGGACCUAACCUAAAUGCAGGUGAGGACAUCCAGCUUCUUAAGGCAGCAUAUG	3512-3596	-23.4
72	>FJ882951.1_72	GGACAUCUUACUUGCACCAUUGUUGUCAGCAGGCAUAUUUGGUGCUAAACCACUUCAGUCUUUACAAGUGUGCGUGCAGACGGUUC	3613-3698	-26.6
73	>FJ882951.1_73	UUGUCAGCAGGCAUAUUUGGUGCUAAACCACUUCAGUCUUUACAAGUGUGCGUGCAGACGGUUCGUACACAGGUUUAUAUUGCAGUCAAUGGCAAAGCUCUUUAUGAGCAG	3635-3745	-35.2
74	>FJ882951.1_74	GUACACAGGUUUAUAUUGCAGUCAAUGGCAAAGCUCUUUAUGAGCAGGUUGUCAUGGAUUAUCUUGAUAACCUGAAGC	3699-3776	-30
75	>FJ882951.1_75	GCAAAGCUCUUUAUGAGCAGGUUGUCAUGGAUUAUCUUGAUAACCUGAAGCCUAGAGUGGAAGC	3726-3789	-22.8
76	>FJ882951.1_76	UUGAUAACCUGAAGCCUAGAGUGGAAGCACCUAAACAAGAGGAGCCACCAAACACAGAAGAUUCCAAAACUGAGGAGAAAUCUGUCGUACAGAAGCCUGUCGA	3762-3864	-21.4
77	>FJ882951.1_77	UAAGGCCUGCAUUGAUGAGGUUACCACAACACUGGAAGAAACUAAGUUUCUUACCAAUAAGUUACUCUUGUUUGCUGAUAUCAAUGGUAAGCUUUA	3880-3975	-26.2
78	>FJ882951.1_78	GGAAGAAACUAAGUUUCUUACCAAUAAGUUACUCUUGUUUGCUGAUAUCAAUGGUAAGCUUUACCAUGAUUCUCAGAACAUGCUUAGAGGUGAAGAUAUGUCUUUC	3913-4018	-30
79	>FJ882951.1_79	UUACCAUGAUUCUCAGAACAUGCUUAGAGGUGAAGAUAUGUCUUUCCUUGAGAAGGAUGCACCUUACAUGGUAGGUGAUGUUAUCACUAGUGGUGA	3973-4068	-29
80	>FJ882951.1_80	ACAUGCUUAGAGGUGAAGAUAUGUCUUUCCUUGAGAAGGAUGCACCUUACAUGGUAGGUGAUGUUAUCACUAGUGGUGAUAUCACUUGUGU	3990-4080	-26
81	>FJ882951.1_81	CUUACAUGGUAGGUGAUGUUAUCACUAGUGGUGAUAUCACUUGUGUUGUAAUACCCUCCAAAAAGGCUGGUGGCACUACUGAGAUGCUCUCAAGAGCUUUGAAG	4035-4138	-34.8
82	>FJ882951.1_82	UGGCACUACUGAGAUGCUCUCAAGAGCUUUGAAGAAAGUGCCA	4105-4147	-20.1
83	>FJ882951.1_83	AAGAGCUUUGAAGAAAGUGCCAGUUGAUGAGUAUAUAACCACGUACCCUGGACAAGGAUGUGCUGGUUAUACACUUGAGGAAGCUAAGACUGCUCUU	4126-4222	-20.8
84	>FJ882951.1_84	AAAGUGCCAGUUGAUGAGUAUAUAACCACGUACCCUGGACAAGGAUGUGCUGGUUAUACACUUGAGGAAGCUAAGACUGCUCUUAAGAAAUGCAAAUCUGCAUUUU	4139-4244	-21.6
85	>FJ882951.1_85	AGCUAAGACUGCUCUUAAGAAAUGCAAAUCUGCAUUUUAUGUACUACCUUCAGAAGCACCUAAUGCU	4207-4273	-16.7
86	>FJ882951.1_86	CAAAUCUGCAUUUUAUGUACUACCUUCAGAAGCACCUAAUGCUAAGGAAGAGAUUCUAGGAACUGUAUCCUGGAAUUUG	4231-4309	-19.2
87	>FJ882951.1_87	AGCACCUAAUGCUAAGGAAGAGAUUCUAGGAACUGUAUCCUGGAAUUUGAGAGAAAUGCUUGCUCAUGCUGAAGAGACAAGAAAAUUAAUGCCUAUAUGCAUGGAUGUU	4261-4369	-19.8
88	>FJ882951.1_88	GACAAGAAAAUUAAUGCCUAUAUGCAUGGAUGUUAGAGCCAUAAUGGCAACCAUCCAACGUAAGUAUAAAGGAAUUAAAAUUCAAGAGGGCAUCGUUGACUAUGGUGUC	4336-4444	-29.3
89	>FJ882951.1_89	AGCCAUAAUGGCAACCAUCCAACGUAAGUAUAAAGGAAUUAAAAUUCAAGAGGGCAUCGUUGACUAUGGUGUCCGAUUCUUCUUUUAUACUAGUAAAGAGCCUGUAGCU	4372-4480	-33.1
90	>FJ882951.1_90	UGACUAUGGUGUCCGAUUCUUCUUUUAUACUAGUAAAGAGCCUGUAGCUUCUAUUAUUACGAAGCUGAACUCUCUAAAUGAGCCGCUUGUCACAAUGCCAAUUGGUUA	4432-4539	-31.2
91	>FJ882951.1_91	AGCCUGUAGCUUCUAUUAUUACGAAGCUGAACUCUCUAAAUGAGCCGCUUGUCACAAUGCCAAUUGGUUAUGUGACACAUGGUUUUAAUCUUGAAGAGGCUGCGCGCU	4470-4577	-32.1
92	>FJ882951.1_92	GUGACACAUGGUUUUAAUCUUGAAGAGGCUGCGCGCUGUAUGCGUUCUCUUAAAGCUCCUGCCGUAGUGUCAGUAUCAUCAC	4541-4622	-18.8
93	>FJ882951.1_93	AUGCCAAUUGGUUAUGUGACACAUGGUUUUAAUCUUGAAGAGGCUGCGCGCUGUAUGCGUUCUCUUAAAGCUCCUGCCGUAGUGUCAGUAU	4526-4616	-23.8
94	>FJ882951.1_94	AGCUCCUGCCGUAGUGUCAGUAUCAUCACCAGAUGCUGUUACUACAUAUAAUGGAUACCU	4594-4653	-20.3
95	>FJ882951.1_95	GUCAGUAUCAUCACCAGAUGCUGUUACUACAUAUAAUGGAUACCUCACUUCGUCAUCAAAGACAUCUGAGGAGCACUUUGUAGAAACAGUUUCUUUGGCUGGC	4609-4711	-36.4
96	>FJ882951.1_96	AGUAUCAUCACCAGAUGCUGUUACUACAUAUAAUGGAUACCUCACUUCGUCAUCAAAGACAUCUGAGGAGCACUUUGUAGAAACAGUUUCUUUGGCUGGCUCU	4612-4714	-34.7
97	>FJ882951.1_97	CUAUUCAGGACAGCGUACAGAGUUAGGUGUUGAAUUUCUUAAGCGUGGUGACAAAAUUGUGUACCACACUCUGGAGAGCCCCGUCGAGUUUCAUCUUGACGG	4729-4830	-28.7
98	>FJ882951.1_98	GCGUGGUGACAAAAUUGUGUACCACACUCUGGAGAGCCCCGUCGAGUUUCAUCUUGACGGUGAGGUUCUUUCACUUGACAAACUAAAGAGUCUCUUAUCCCUGC	4771-4874	-27.4
99	>FJ882951.1_99	AUCCCUGCGGGAGGUUAAGACUAUAAAAGUGUUCACAACUGUGGACAACACUAAUCUCCACACACAGCUUGUGGAUAUGUCUAUGACAUAUGGACAGCAGUUUGGU	4867-4972	-32.8
100	>FJ882951.1_100	CGGGAGGUUAAGACUAUAAAAGUGUUCACAACUGUGGACAACACUAAUCUCCACACACAGCUUGUGGAUAUGUCUAUGACAUAUGGACAGCAGUUUGGUCCAACAUACUUG	4874-4984	-35.7
101	>FJ882951.1_101	UUGUGGAUAUGUCUAUGACAUAUGGACAGCAGUUUGGUCCAACAUACUUGGAUGGUGCUGAUGUUACAA	4935-5003	-17.4
102	>FJ882951.1_102	UAUGUCUAUGACAUAUGGACAGCAGUUUGGUCCAACAUACUUGGAUGGUGCUGAUGUUACAAAAAUUAAACCUCAUGUAAAUCAUG	4942-5027	-23.9
103	>FJ882951.1_103	AAACCUCAUGUAAAUCAUGAGGGUAAGACUUUCUUUGUACUACCUAGUGAUGACACACUACGUAGUGAAGCUUUCGAGUACUACCAUACUCUUGAUGAGAGUUUU	5009-5113	-33.4
104	>FJ882951.1_104	UGAAGCUUUCGAGUACUACCAUACUCUUGAUGAGAGUUUUCUUGGUAGGUACAUGUCUGCUUUAAACCACACAAAGAAAUGGAAAUUUCCUCAAGUUGGUGGUUUAACUUCA	5074-5185	-32.5
105	>FJ882951.1_105	GUUGGUGGUUUAACUUCAAUUAAAUGGGCUGAUAACAAUUGUUAUUUGUCUAGUGUUUUAUUAGCACUUCAACAGCUUGAAGUCAAAUUCAAUGCACCAGC	5168-5268	-29.6
106	>FJ882951.1_106	GUCUAGUGUUUUAUUAGCACUUCAACAGCUUGAAGUCAAAUUCAAUGCACCAGCACUUCAAGAGGCUUAUUAUAGAGCCCGUGCUGGUGAUGCUGCUAAC	5215-5314	-29.1
107	>FJ882951.1_107	UGCACCAGCACUUCAAGAGGCUUAUUAUAGAGCCCGUGCUGGUGAUGCUGCUAACUUUUGUGCA	5260-5323	-17.7
108	>FJ882951.1_108	CGUGCUGGUGAUGCUGCUAACUUUUGUGCACUCAUACUCGCUUACAGUAAUAAAACUGUUGGCGAGCUUGGUGAUGUCAGAGAAACUAUGACCCAUCUUCUACAGCAUG	5294-5402	-40.5
109	>FJ882951.1_109	UGACCCAUCUUCUACAGCAUGCUAAUUUGGAAUCUGCAAAGCGAGUUCUUAAUGUGGUGUGUAAACAUUGUGGUCA	5382-5457	-18.4
110	>FJ882951.1_110	UCUUCUACAGCAUGCUAAUUUGGAAUCUGCAAAGCGAGUUCUUAAUGUGGUGUGUAAACAUUGUGGUCAGA	5389-5459	-17.1
111	>FJ882951.1_111	ACAUUGUGGUCAGAAAACUACUACCUUAACGGGUGUAGAAGCUGUGAUGUAUAUGGGUACUCUAUCUUAUGAUAAUCUUAAGACAGGUGUUUCCAUUCCAUGUGU	5446-5550	-24.3
112	>FJ882951.1_112	ACUACUACCUUAACGGGUGUAGAAGCUGUGAUGUAUAUGGGUACUCUAUCUUAUGAUAAUCUUAAGACAGGUGUUUCCAUUCCAUGUGUGUGUGGUCGU	5462-5560	-24.4
113	>FJ882951.1_113	AGACAGGUGUUUCCAUUCCAUGUGUGUGUGGUCGUGAUGCUACACAAUAUCUAGUACAACAAGAGUCUUCUUUUGUUAUGAUGUCU	5526-5611	-18.6
114	>FJ882951.1_114	UGCUACACAAUAUCUAGUACAACAAGAGUCUUCUUUUGUUAUGAUGUCUGCACCACCUGCUGAGUAUAAAUUACAGCAAGGUACAUUCUUAUGUGCGAAUGAGUACACUGGUA	5563-5675	-32.5
115	>FJ882951.1_115	UGUUAUGAUGUCUGCACCACCUGCUGAGUAUAAAUUACAGCAAGGUACAUUCUUAUGUGCGAAUGAGUACACUGGUAACUAUCAGUGUGGUCAUUACA	5599-5696	-27.1
116	>FJ882951.1_116	AGCAAGGUACAUUCUUAUGUGCGAAUGAGUACACUGGUAACUAUCAGUGUGGUCAUUACACUCAUAUAACUGCU	5637-5710	-25.2
117	>FJ882951.1_117	GGUACAUUCUUAUGUGCGAAUGAGUACACUGGUAACUAUCAGUGUGGUCAUUACACUCAUAUAACUGCU	5642-5710	-24.7
118	>FJ882951.1_118	UAUCAGUGUGGUCAUUACACUCAUAUAACUGCUAAGGAGACCCUCUAUCGUAUUGACGGAGCUCACCUUACAAAGAUGUCAGAGUACAAAGGACCAGUGACUGAUG	5678-5783	-41.8
119	>FJ882951.1_119	AGCUCACCUUACAAAGAUGUCAGAGUACAAAGGACCAGUGACUGAUGUUUUCUACAAGGAAACAUCUUACACUACAACCAUCAAGCCUGUGUCGUAUAAACUCGAUGGAGUU	5737-5848	-27.3
120	>FJ882951.1_120	UUGGAUGGGUAUUAUAAAAAGGAUAACGCUUACUAUACAGAGCAGCCUAUAGACCUUGUACCAACUCAA	5873-5941	-17.5
121	>FJ882951.1_121	UGGAUGGGUAUUAUAAAAAGGAUAACGCUUACUAUACAGAGCAGCCUAUAGACCUUGUACCAACUCAACCA	5874-5944	-20
122	>FJ882951.1_122	UGAUUUAAAUCAAAUGACAGGCUUCACAAAGCCAGCUUCACGAGAGCUAUCUGUCA	6004-6059	-14.7
123	>FJ882951.1_123	AGCCAGCUUCACGAGAGCUAUCUGUCACAUUCUUCCCAGACUUGAAUGGCGAUGUAGUGGCU	6033-6094	-16.7
124	>FJ882951.1_124	AGCUAUCUGUCACAUUCUUCCCAGACUUGAAUGGCGAUGUAGUGGCUAUUGACUAUAGACACUAUUCAGCGAGUUUCAAGAAAGGUGCUAAAUUACU	6048-6144	-30
125	>FJ882951.1_125	CCAGACUUGAAUGGCGAUGUAGUGGCUAUUGACUAUAGACACUAUUCAGCGAGUUUCAAGAAAGGUGCUAAAUUACUGCAUAAGCCAAUUGUUUGG	6068-6163	-29.3
126	>FJ882951.1_126	AGUUUCAAGAAAGGUGCUAAAUUACUGCAUAAGCCAAUUGUUUGGCACAUUAACCAGGCU	6119-6178	-16.9
127	>FJ882951.1_127	AAUUGUUUGGCACAUUAACCAGGCUACAACCAAGACAACGUUCAAACCAAACACUUGGUGUUUACGUUGUCUUUGGAGUACAAAGCCAGUAGAUACUUCAAAUUCAUU	6154-6261	-38.6
128	>FJ882951.1_128	UGUUUACGUUGUCUUUGGAGUACAAAGCCAGUAGAUACUUCAAAUUCAUUUGAAGUUCUGGCAGUAGAAGACACACAAGGAAUGGACA	6212-6299	-26.9
129	>FJ882951.1_129	UGGCAGUAGAAGACACACAAGGAAUGGACAAUCUUGCUUGUGAAAGUCAACAACCCA	6270-6326	-12.7
130	>FJ882951.1_130	ACAAUCUUGCUUGUGAAAGUCAACAACCCACCUCUGAAGAAGUAGUGGAAAAUCCUACCAUACAGAAGGAAGUCAUAGAGUGUGACGUGAAAACUACCGAAGUUGU	6297-6402	-22.9
131	>FJ882951.1_131	UGUGAAAGUCAACAACCCACCUCUGAAGAAGUAGUGGAAAAUCCUACCAUACAGAAGGAAGUCAUAGAGUGUGACGUGAAAACUACCGAAGUUGUAGGCAAUGUCAUA	6308-6415	-25.1
132	>FJ882951.1_132	UCUGAAGAAGUAGUGGAAAAUCCUACCAUACAGAAGGAAGUCAUAGAGUGUGACGUGAAAACUACCGAAGUUGUAGGCAAUGUCAUACUUAAACCAUCAGA	6329-6429	-22.7
133	>FJ882951.1_133	UAGGCAAUGUCAUACUUAAACCAUCAGAUGAAGGUGUUAAAGUAACACAGGAGUUAGGUCAUGAGGAUCUUAUGGCUGCUUA	6402-6483	-17.3
134	>FJ882951.1_134	AAGGUGUUAAAGUAACACAGGAGUUAGGUCAUGAGGAUCUUAUGGCUGCUUAUGUGGAAAACACAAGCAUUACCAUUAAGAAACCUAAUGAGCUUUCACUAGCCUU	6432-6537	-35.1
135	>FJ882951.1_135	GCAUUACCAUUAAGAAACCUAAUGAGCUUUCACUAGCCUUAGGUUUAAAAACAAUUGC	6498-6555	-16.1
136	>FJ882951.1_136	CAAUUGCCACUCAUGGUAUUGCUGCAAUUAAUAGUGUUCCUUGGAGUAAAAUUUUGGCUUAUGUCAAACCAUUCUUAGGACAAGCAGCAAUUACAACAUCAAAUUG	6549-6654	-30.6
137	>FJ882951.1_137	UGCCACUCAUGGUAUUGCUGCAAUUAAUAGUGUUCCUUGGAGUAAAAUUUUGGCUUAUGUCAAACCAUUCUUAGGACAAGCAGCAAUUACAACAUCAAAUUGCG	6553-6656	-28.2
138	>FJ882951.1_138	UGCUGCAAUUAAUAGUGUUCCUUGGAGUAAAAUUUUGGCUUAUGUCAAACCAUUCUUAGGACAAGCAGCAAUUACAACAUCAAAUUGCGCUAAGAGAUUAGCA	6568-6670	-30.3
139	>FJ882951.1_139	UAGGACAAGCAGCAAUUACAACAUCAAAUUGCGCUAAGAGAUUAGCACAACGUGUGUUUAACAAUUAUAUGCCUUAUGUGUUUACAUUAUUGUUCCAAUUGUGUA	6624-6728	-22.5
140	>FJ882951.1_140	UUUUACUAAAAGUACCAAUUCUAGAAUUAGAGCUUCACUACCUACAACUAUUGCUAAAAAUAGUGUUAAGAGUGUUGCUAAAUUAUGUUUGGAUGCCGGCAUUAAUUAUGUGAAG	6730-6844	-31.1
141	>FJ882951.1_141	GCUAAAAAUAGUGUUAAGAGUGUUGCUAAAUUAUGUUUGGAUGCCGGCAUUAAUUAUGUGAAGUCACCCAAAUUUUCUAAAUUGUUCACAAUCGCUAUGUGGC	6782-6884	-29.5
142	>FJ882951.1_142	GGUGCUCCUUCUUAUUGUAAUGGCGUUAGAGAAUUGUAUCUUAAUUCGUCUAACGUUACUACUAUGGAUUUCUGUGAAGGUUCUUUUCC	6959-7047	-27.3
143	>FJ882951.1_143	UGAAACCAUUCAGGUGACGAUUUCAUCGUACAAGCUAGACUUGACAAUUUUAGGUCUGGCCGCUGAGUGGGUUUUGGCAUAUAUGUUGUUCA	7099-7190	-30
144	>FJ882951.1_144	UGAAACCAUUCAGGUGACGAUUUCAUCGUACAAGCUAGACUUGACAAUUUUAGGUCUGGCCGCUGAGUGGGUUUUGGCAUAUAUGUUGUUCACAAAAUUCUUUUA	7099-7203	-22.8
145	>FJ882951.1_145	GGUCUUUCAGCUAUAAUGCAGGUGUUCUUUGGCUAUUUUGCUAGUCAUUUCAUCAGCAAUUCUUGGCUCAUGUGGUUUAUCAUUAGUAUUGUACAAAUGGCACC	7211-7314	-29.7
146	>FJ882951.1_146	AGCUAUAAUGCAGGUGUUCUUUGGCUAUUUUGCUAGUCAUUUCAUCAGCAAUUCUUGGCUCAUGUGGUUUAUCAUUAGUAUUGUACAAAUGGCACCCGUUUCUGCAAUGGUU	7219-7330	-32.4
147	>FJ882951.1_147	AGCAAUUCUUGGCUCAUGUGGUUUAUCAUUAGUAUUGUACAAAUGGCACCCGUUUCUGCAAUGGUUAGGAUGUACAUCUUCUUUGCU	7265-7351	-24.3
148	>FJ882951.1_148	UCUUGGCUCAUGUGGUUUAUCAUUAGUAUUGUACAAAUGGCACCCGUUUCUGCAAUGGUUAGGAUGUACAUCUUCUUUGCUUCUUUCUACUACAUAUGGAAGA	7271-7373	-29.4
149	>FJ882951.1_149	GCUAUGUUCAUAUCAUGGAUGGUUGCACCUCUUCGACUUGCAUGAUGUGCUAUAAGCGCAAUCGUGCCACACGCGUUGAGUGUACAACUAUUGUUAAUGGC	7374-7474	-32.3
150	>FJ882951.1_150	UAUGUUCAUAUCAUGGAUGGUUGCACCUCUUCGACUUGCAUGAUGUGCUAUAAGCGCAAUCGUGCCACACGCGUUGAGUGUACAACUAUUGUUAAUGGCAUG	7376-7477	-33.8
151	>FJ882951.1_151	CCUCUUCGACUUGCAUGAUGUGCUAUAAGCGCAAUCGUGCCACACGCGUUGAGUGUACAACUAUUGUUAAUGGCAUGAAGAGAUCUUUCUAUGUCUAUGCAAAUGGAGG	7401-7509	-37.6
152	>FJ882951.1_152	ACUAUUGUUAAUGGCAUGAAGAGAUCUUUCUAUGUCUAUGCAAAUGGAGGCCGUGGCUUCUGCAAGACUCACAAUUGGAAUUGUCUCAAUUGUGACACAUUUUGCACUGGU	7460-7570	-32.2
153	>FJ882951.1_153	AAUUGGAAUUGUCUCAAUUGUGACACAUUUUGCACUGGUAGUACAUUCAUUAGUGAUGAAGUUGCUCGUGAUUUGUCACUCCAGUU	7532-7617	-19.7
154	>FJ882951.1_154	AGUACAUUCAUUAGUGAUGAAGUUGCUCGUGAUUUGUCACUCCAGUUUAAAAGACCAAUCAACCCUACUGACCAGUCAUCGUAUAUUGUUGAUAGUGUUGCU	7571-7672	-25.8
155	>FJ882951.1_155	UGAAGUUGCUCGUGAUUUGUCACUCCAGUUUAAAAGACCAAUCAACCCUACUGACCAGUCAUCGUAUAUUGUUGAUAGUGUUGCUGUGAAAAAUGGCGCGCUUCA	7588-7692	-27
156	>FJ882951.1_156	UGACCAGUCAUCGUAUAUUGUUGAUAGUGUUGCUGUGAAAAAUGGCGCGCUUCACCUCUACUUUGACAAGGCUGGUCA	7639-7716	-23.8
157	>FJ882951.1_157	UGGCGCGCUUCACCUCUACUUUGACAAGGCUGGUCAAAAGACCUAUGAGAGACAUCCGCUCUCCCAUUUUGUCAAUUUAGACAAUUUGAGAGCUAACA	7681-7778	-23.9
158	>FJ882951.1_158	GAGCUAACAACACUAAAGGUUCACUGCCUAUUAAUGUCAUAGUUUUUGAUGGCAAGUCCAAAUGCGACGAGUCUGCUUCUAAGUCUGCUU	7770-7859	-20.2
159	>FJ882951.1_159	AGCUAACAACACUAAAGGUUCACUGCCUAUUAAUGUCAUAGUUUUUGAUGGCAAGUCCAAAUGCGACGAGUCUGCUUCUAAGUCUGCUUCUGUGUACUACAGUCAGCU	7771-7878	-25.8
160	>FJ882951.1_160	CGAGUCUGCUUCUAAGUCUGCUUCUGUGUACUACAGUCAGCUGAUGUGCCAACCUAUUCUGUUGCUUGACCAAGUUCUUGUAUCAGACGUUG	7837-7928	-21.9
161	>FJ882951.1_161	AGUCUGCUUCUAAGUCUGCUUCUGUGUACUACAGUCAGCUGAUGUGCCAACCUAUUCUGUUGCUUGACCAAGUUCUUGUAUCAGACGUUGGAGAUAGUACU	7839-7939	-23.8
162	>FJ882951.1_162	UUGAUGCUUAUGUCGACACCUUUUCAGCAACUUUUAGUGUUCCUAUGGAAAAACUUAAGGCACUUGUUGCUACAGCUCACAGCGAGUUAGCAAAGG	7959-8054	-25.3
163	>FJ882951.1_163	UAAGGCACUUGUUGCUACAGCUCACAGCGAGUUAGCAAAGGGUGUAGCUUUAGAUGGUGUCCUUUCUACAUUCGUGUCAGCUGCCCGACAAGGUGUUGUUGAUA	8014-8117	-35.4
164	>FJ882951.1_164	AGGGUGUAGCUUUAGAUGGUGUCCUUUCUACAUUCGUGUCAGCUGCCCGACAAGGUGUUGUUGAUACCGAUGUUGACACAAAGGAUGUUAUUGAAUGUCUCAAACUUU	8052-8159	-35.4
165	>FJ882951.1_165	GCAAAGGGUGUAGCUUUAGAUGGUGUCCUUUCUACAUUCGUGUCAGCUGCCCGACAAGGUGUUGUUGAUACCGAUGUUGACACAAAGGAUGUUAUUGAAUGU	8048-8149	-32.3
166	>FJ882951.1_166	AGGUGUUGUUGAUACCGAUGUUGACACAAAGGAUGUUAUUGAAUGUCUCAAACUUUCACAUCACUCUGACUUAGAAGUGACAGGUGACAGUUGUAACAAUUUCAUGCUCACCU	8104-8216	-30.9
167	>FJ882951.1_167	GUGACAGGUGACAGUUGUAACAAUUUCAUGCUCACCUAUAAUAAGGUUGAAAACAUGACGCCCAGAGAUCUUGGCGCAUGUAUUGACUGUAAUGCAAGGCAU	8180-8281	-18.4
168	>FJ882951.1_168	ACAUGACGCCCAGAGAUCUUGGCGCAUGUAUUGACUGUAAUGCAAGGCAUAUCAAUGCCCAAGUAGCAAAAAGUCACAAUGUUUCACUCAUCUGGAAUGU	8232-8331	-33.1
169	>FJ882951.1_169	GUAGCAAAAAGUCACAAUGUUUCACUCAUCUGGAAUGUAAAAGACUACAUGUCUUUAUCUGAACAGCUGCGUAAACAAAUUCGUAGUGCUGC	8294-8385	-23
170	>FJ882951.1_170	ACAGCUGCGUAAACAAAUUCGUAGUGCUGCCAAGAAGAACAACAUACCUUUUAGACUAACUUGUGCUACAACUAGACAGGUUGU	8356-8439	-15.1
171	>FJ882951.1_171	UGUGCUACAACUAGACAGGUUGUCAAUGUCAUAACUACUAAAAUCUCACUCAAGGGUGGUAAGAUUGUUAGUACUUGUUUUAAACUUAUGCUUAAGGCCACA	8417-8518	-26.9
172	>FJ882951.1_172	GGUAAGAUUGUUAGUACUUGUUUUAAACUUAUGCUUAAGGCCACAUUAUUGUGCGUUCUUGCUGCAUUGGUUUGUUAUAUCGUUAUGCCAGUACAUACAUUGUCAAUC	8474-8581	-31.3
173	>FJ882951.1_173	AUAUCGUUAUGCCAGUACAUACAUUGUCAAUCCAUGAUGGUUACACAAAUGAAAUCAUUGGUUACAAAGCCAUUCAGGAUGGUGUCACUCGUGACAUCAU	8550-8649	-27.7
174	>FJ882951.1_174	ACAUCAUUUCUACUGAUGAUUGUUUUGCAAAUAAACAUGCUGGUUUUGACGCAUGGUUUAGCCAGCGUGGCGGUUCAUACAAAAAUGACAAAAGCUGCCCUGU	8643-8745	-29.3
175	>FJ882951.1_175	UGGUUUAGCCAGCGUGGCGGUUCAUACAAAAAUGACAAAAGCUGCCCUGUAGUAGCUGCUAUCAUUACAAGAGAGAUUGGUUUCAUAGUGCCUGGCUUACCG	8696-8797	-35.5
176	>FJ882951.1_176	AAUCAAUGGUGACUUCUUGCAUUUUCUACCUCGUGUUUUUAGUGCUGUUGGCAACAUUUGCUACACACCUUCCAAACUCAUUGAGUAUAGUGAUU	8815-8909	-19.8
177	>FJ882951.1_177	UAGUGCUGUUGGCAACAUUUGCUACACACCUUCCAAACUCAUUGAGUAUAGUGAUUUUGCUACCUCUGCUUG	8854-8925	-15.7
178	>FJ882951.1_178	GCGUUCUUGCUGCUGAGUGUACAAUUUUUAAGGAUGCUAUGGGCAAACCUGUGCCAUAUUGUUAUGACACUAAUUUGCUAGAGGGU	8925-9010	-26.3
179	>FJ882951.1_179	CUAUUUCUUAUAGUGAGCUUCGUCCAGACACUCGUUAUGUGCUUAUGGAUGGUUCCAUCAUACAGUUUCCUAACACUUACCUGGAGGGUUCUGUUAGAGUAG	9012-9113	-29.6
180	>FJ882951.1_180	GCUUCGUCCAGACACUCGUUAUGUGCUUAUGGAUGGUUCCAUCAUACAGUUUCCUAACACUUACCUGGAGGGUUCUGUUAGAGUAGUAACAACUUUUGAUGCUGAGU	9028-9134	-27.1
181	>FJ882951.1_181	ACUCGUUAUGUGCUUAUGGAUGGUUCCAUCAUACAGUUUCCUAACACUUACCUGGAGGGUUCUGUUAGAGUAGUAACAACUUUUGAUGCUGAGUACUGUAGACAUGGU	9041-9148	-27.8
182	>FJ882951.1_182	GCUUAUGGAUGGUUCCAUCAUACAGUUUCCUAACACUUACCUGGAGGGUUCUGUUAGAGUAGUAACAACUUUUGAUGCUGAGUACUGUAGACAUGGUACAUGCGAAAGGU	9052-9161	-27.9
183	>FJ882951.1_183	UUACCUGGAGGGUUCUGUUAGAGUAGUAACAACUUUUGAUGCUGAGUACUGUAGACAUGGUACAUGCGAAAGGUCAGAAGUAGGUAUUUGCCUAUCUACCAGUGGUAG	9088-9195	-27.7
184	>FJ882951.1_184	AACUUUUGAUGCUGAGUACUGUAGACAUGGUACAUGCGAAAGGUCAGAAGUAGGUAUUUGCCUAUCUACCAGUGGUAGAUGGGUUCUUAAUAAUGAGCAUUACAGAGCUCUAUCAGGAGUU	9118-9238	-33.9
185	>FJ882951.1_185	UAUCUACCAGUGGUAGAUGGGUUCUUAAUAAUGAGCAUUACAGAGCUCUAUCAGGAGUUUUCUGUGGUGUUGAUG	9180-9254	-17.4
186	>FJ882951.1_186	AUAAUGAGCAUUACAGAGCUCUAUCAGGAGUUUUCUGUGGUGUUGAUGCGAUGAAUCUCAUAGCUAACAUCUUUACUCCUCUUGUGCAACCUGUGGGUGCUUUAGAUGU	9207-9315	-28
187	>FJ882951.1_187	CAUAGCUAACAUCUUUACUCCUCUUGUGCAACCUGUGGGUGCUUUAGAUGUGUCUGCUUCAGUAGUGGCUGGUGGUAUUAUUGCCAUAUUGGUGACUUGUG	9265-9365	-27.4
188	>FJ882951.1_188	GUAGUGGCUGGUGGUAUUAUUGCCAUAUUGGUGACUUGUGCUGCCUACUACUUUAUGAAAUUCAGACGUGUUUUUGGUGAGUACAACCAUGUUGUUGCUGC	9326-9426	-29
189	>FJ882951.1_189	UGAAAUUCAGACGUGUUUUUGGUGAGUACAACCAUGUUGUUGCUGCUAAUGCACUUUUGUUUUUGAUGUCUUUCACUAUACUCUGUCUGGUACCA	9381-9475	-27.1
190	>FJ882951.1_190	GUUGUUGCUGCUAAUGCACUUUUGUUUUUGAUGUCUUUCACUAUACUCUGUCUGGUACCAGCUUACAGC	9416-9484	-18
191	>FJ882951.1_191	AUACUCUGUCUGGUACCAGCUUACAGCUUUCUGCCGGGAGUCUACUCAGUCUUUUACUUGUACUUGACAUUCUAU	9458-9532	-19.1
192	>FJ882951.1_192	UGGUACCAGCUUACAGCUUUCUGCCGGGAGUCUACUCAGUCUUUUACUUGUACUUGACAUUCUAUUUCACCAAUGAUGUUUCAUUCUUGGCUCACCUUCAAUGGUUUGCCA	9468-9578	-29.2
193	>FJ882951.1_193	UGAUGUUUCAUUCUUGGCUCACCUUCAAUGGUUUGCCAUGUUUUCUCCUAUUGUGCCUUUUUGGAUAACAGCA	9541-9613	-13.5
194	>FJ882951.1_194	CAUGUUUUCUCCUAUUGUGCCUUUUUGGAUAACAGCAAUCUAUGUAUUCUGUAUUUCUCUGAAGCACUGCCAUUGGUUCUUUAACAACUAUCUUAGGAAAAGAGUCAUG	9577-9685	-26.4
195	>FJ882951.1_195	GUCAUGUUUAAUGGAGUUACAUUUAGUACCUUCGAGGAGGCUGCUUUGUGUACCUUUUUGCUCAACAAGGAAAUGUACCUAAAAUUGCGUAGC	9680-9772	-20.9
196	>FJ882951.1_196	GCUGCUUUGUGUACCUUUUUGCUCAACAAGGAAAUGUACCUAAAAUUGCGUAGC	9719-9772	-13.8
197	>FJ882951.1_197	GCUCAACAAGGAAAUGUACCUAAAAUUGCGUAGCGAGACACUGUUGCCACUUACACAGUAUAACAGGUAUCUUGCUCUAUAUAACAAGUACAAGUAUUUCAGUGGAGC	9739-9846	-37.6
198	>FJ882951.1_198	UCAGUGGAGCCUUAGAUACUACCAGCUAUCGUGAAGCAGCUUGCUGCCACUUAGCAAAGGCUCUAAAUGA	9837-9906	-24.3
199	>FJ882951.1_199	UCAGUGGAGCCUUAGAUACUACCAGCUAUCGUGAAGCAGCUUGCUGCCACUUAGCAAAGGCUCUAAAUGACUUUAGCAACUCAGGUGCUGA	9837-9927	-28.9
200	>FJ882951.1_200	GCCACUUAGCAAAGGCUCUAAAUGACUUUAGCAACUCAGGUGCUGAUGUUCUCUACCAACCACCACAGACAUCAAUCACUUCUGCUGUUCUGCAGAGUGGU	9882-9982	-31.4
201	>FJ882951.1_201	CUCUACCAACCACCACAGACAUCAAUCACUUCUGCUGUUCUGCAGAGUGGUUUUAGGAAAAUGGCAUUCCCGUCAGGCAAAGUUGAAGGGUGCAUGGUACAAG	9932-10034	-27.2
202	>FJ882951.1_202	GUUCUGCAGAGUGGUUUUAGGAAAAUGGCAUUCCCGUCAGGCAAAGUUGAAGGGUGCAUGGUACAAGUAACCUGUGGAAC	9968-10047	-18.7
203	>FJ882951.1_203	GCAAAGUUGAAGGGUGCAUGGUACAAGUAACCUGUGGAACUACAACUCUUAAUGGAUUGUGGUUGGAUGACACAGUAUACUGUCCAAGACAUGUCAUUUGC	10008-10108	-29.5
204	>FJ882951.1_204	CUGUGGAACUACAACUCUUAAUGGAUUGUGGUUGGAUGACACAGUAUACUGUCCAAGACAUGUCAUUUGCACAG	10039-10112	-20.8
205	>FJ882951.1_205	UUGUGGUUGGAUGACACAGUAUACUGUCCAAGACAUGUCAUUUGCACAGCAGAAGACAUGCUUAAUCCUAACUAUGAAGAUCUGCUCAUUCGCAAAUCCAACCAUAG	10064-10170	-28.6
206	>FJ882951.1_206	GACAUGCUUAAUCCUAACUAUGAAGAUCUGCUCAUUCGCAAAUCCAACCAUAGCUUUCUUGUUCAGGCUGGCAAUGUU	10118-10195	-18.6
207	>FJ882951.1_207	GACAUGCUUAAUCCUAACUAUGAAGAUCUGCUCAUUCGCAAAUCCAACCAUAGCUUUCUUGUUCAGGCUGGCAAUGUUCAACUUCGUGUU	10118-10207	-15
208	>FJ882951.1_208	UAGCUUUCUUGUUCAGGCUGGCAAUGUUCAACUUCGUGUUAUUGGCCAUUCUAUGCAAAAUUGUCUGCUUAGGCUUAAAGUUG	10168-10250	-18.4
209	>FJ882951.1_209	UCAACUUCGUGUUAUUGGCCAUUCUAUGCAAAAUUGUCUGCUUAGGCUUAAAGUUGA	10195-10251	-15
210	>FJ882951.1_210	GUUAUUGGCCAUUCUAUGCAAAAUUGUCUGCUUAGGCUUAAAGUUGAUACUUCUAACCCUAAGACACCCAAGUAUAAAUUUGUCCGUAUCCAACCUGGUCAAACAU	10205-10310	-24.9
211	>FJ882951.1_211	AUAAAUUUGUCCGUAUCCAACCUGGUCAAACAUUUUCAGUUCUAGCAUGCUACAAUGGUUCACCAUCUGGUGUUUAU	10278-10354	-17.3
212	>FJ882951.1_212	AUCUGGUGUUUAUCAGUGUGCCAUGAGACCUAAUUAUACCAUUAAAGGUUCUUUCCUUAAUGGAUCAUGUGGUAGUGUUGGUUUUAACAUUGAUUAUGAUUGCGUGU	10342-10448	-29.8
213	>FJ882951.1_213	UGCGUGUCUUUCUGCUAUAUGCAUCAUAUGGAGCUUCCAACAGGGGUACACGCUGGUACUGACUUAGAAGGUAAAUUCUAUGGUCCAUUUGUUGACAGACAAACUGCA	10442-10549	-30.8
214	>FJ882951.1_214	GUACUGACUUAGAAGGUAAAUUCUAUGGUCCAUUUGUUGACAGACAAACUGCACAGGCUGCAGGUAC	10497-10563	-10.1
215	>FJ882951.1_215	AUUUGUUGACAGACAAACUGCACAGGCUGCAGGUACAGACACAACCAUAACAUUAAAUGUUUUGGCAUGGCUGUAUGCUGCUGUUAUCAAUGGUGAUAGGUGGUUUCUUAAUAGAU	10528-10643	-37.6
216	>FJ882951.1_216	GUUAUCAAUGGUGAUAGGUGGUUUCUUAAUAGAUUCACCACUACUUUGAAUGAC	10610-10663	-11.3
217	>FJ882951.1_217	GUGGUUUCUUAAUAGAUUCACCACUACUUUGAAUGACUUUAACCUUGUGGCAAUGAAGUACAACUAU	10627-10693	-14.9
218	>FJ882951.1_218	GUGGCAAUGAAGUACAACUAUGAACCUUUGACACAAGAUCAUGUUGACAUAUUGGGAC	10673-10730	-12.3
219	>FJ882951.1_219	UCAUGUUGACAUAUUGGGACCUCUUUCUGCUCUAACAGGAAUUGCCGUCUUAGAUAUGUGUGCUGCUUUGA	10711-10781	-16.3
220	>FJ882951.1_220	UUAGAUAUGUGUGCUGCUUUGAAAGCGCUGCUGCAGAAUGGUAUGAAUGGUCGUACUAUCCUUGGUAGCACUAUUUUAGAAGAUGAGUUUACACCAUUUGA	10760-10860	-32.6
221	>FJ882951.1_221	AGAAGAUGAGUUUACACCAUUUGAUGUUGUUAGACAAUGCUCUGGUGUUACCUUCCAAGGUAAGUUCAAGAAAAUUGUUAAGGGCACUCAUCAUUGGAUGCUUUUAACUUUCU	10837-10949	-38.6
222	>FJ882951.1_222	GUGUUACCUUCCAAGGUAAGUUCAAGAAAAUUGUUAAGGGCACUCAUCAUUGGAUGCUUUUAACUUUCUUGACAUCACUAUUGAUUCUUGUUCAAAGUACAC	10881-10982	-32.6
223	>FJ882951.1_223	AUUCUUGUUCAAAGUACACAGUGGUCACUGUUUUUCUUUGUUUACGAGAAU	10964-11014	-13.7
224	>FJ882951.1_224	UACGAGAAUGCUUUCUUGCCAUUUACUCUUGGUAUUAUGGCAAUUGCUGCAUGUGCUAUGCUGCUUGUUAAGCAUAAGCACGCAUUCUUGUG	11006-11097	-32.1
225	>FJ882951.1_225	ACGCAUUCUUGUGCUUGUUUCUGUUACCUUCUCUUGCAACAGUUGCUUACUUUAAUAUGGUCUACAUGCCUGCUAGCUGGGUGAUGCGU	11085-11173	-25.2
226	>FJ882951.1_226	GGUCUACAUGCCUGCUAGCUGGGUGAUGCGUAUCAUGACAUGGCUUGAAUUGGCUGACACUAGCUUGUCUGGUUAUAGGCU	11143-11223	-27.3
227	>FJ882951.1_227	GACAUGGCUUGAAUUGGCUGACACUAGCUUGUCUGGUUAUAGGCUUAAGGAUUGUGUUAUGUAUGCUUCAGCUUUAGUUUUGCUUAUUCUCAUGACAGCUCGCACUGUU	11179-11287	-24.7
228	>FJ882951.1_228	GACACUAGCUUGUCUGGUUAUAGGCUUAAGGAUUGUGUUAUGUAUGCUUCAGCUUUAGUUUUGCUUAUUCUCAUGACAGCUCGCACUGUU	11198-11287	-25.3
229	>FJ882951.1_229	UUAGUUUUGCUUAUUCUCAUGACAGCUCGCACUGUUUAUGAUGAUGCUGCUAGACGUGUUUGGACACUGA	11252-11321	-15.1
230	>FJ882951.1_230	AUGACAGCUCGCACUGUUUAUGAUGAUGCUGCUAGACGUGUUUGGACACUGAUGAAUGUCAU	11270-11331	-14.1
231	>FJ882951.1_231	GCUCGCACUGUUUAUGAUGAUGCUGCUAGACGUGUUUGGACACUGAUGAAUGUCAUUACACUUGUUUACAAAGUCUACUAUGGUAAUGCUUUAGAUCAAGCUAUUUCCAUGUGGGC	11276-11391	-27.1
232	>FJ882951.1_232	ACACUUGUUUACAAAGUCUACUAUGGUAAUGCUUUAGAUCAAGCUAUUUCCAUGUGGGCCUUAGUUAUUUCUGUAACCUCUAACUAUUCUGGUGU	11333-11427	-22
233	>FJ882951.1_233	GUGGGCCUUAGUUAUUUCUGUAACCUCUAACUAUUCUGGUGUCGUUACGACUAUCAUGUUUUUAGCUAGAGCUAUAGUGUUUGUGUGUGUUGAGUAUUACCCAU	11386-11489	-26.1
234	>FJ882951.1_234	AGCUAGAGCUAUAGUGUUUGUGUGUGUUGAGUAUUACCCAUUGUUAUUUAUUACUGGCAACACCUUACAGUGUAUCAUGCU	11449-11529	-19.6
235	>FJ882951.1_235	GUUGAGUAUUACCCAUUGUUAUUUAUUACUGGCAACACCUUACAGUGUAUCAUGCUUGUUUAUUGUUUCUUAGGCUAUUGUUGCUGCUGCUACUUUGGCCUUUUCUGUUUACUCAAC	11474-11590	-30.6
236	>FJ882951.1_236	UCAACCGUUACUUCAGGCUUACUCUUGGUGUUUAUGACUACUUGGUCUCUACACAAGAAUUUAGGUAUAUGAACUCCCAGGGGCUUUUGCCUCCUAAGAGUAGUAUUGA	11586-11694	-39.1
237	>FJ882951.1_237	AAUUUAGGUAUAUGAACUCCCAGGGGCUUUUGCCUCCUAAGAGUAGUAUUGAUGCUUUCAAGCUUAACAUUAAGUUGUUGGGUAUUGGAGGUAAACCAUGUAUCAAGGUU	11643-11752	-25.5
238	>FJ882951.1_238	GGGCUUUUGCCUCCUAAGAGUAGUAUUGAUGCUUUCAAGCUUAACAUUAAGUUGUUGGGUAUUGGAGGUAAACCAUGUAUCAAGGUUGCUACUGUACAGUCU	11666-11767	-24.3
239	>FJ882951.1_239	UUAAGUUGUUGGGUAUUGGAGGUAAACCAUGUAUCAAGGUUGCUACUGUACAGUCUAAAAUGUCUGACGUAAAGUGCACAUCUGUGGUACUGCUCUCGGUUCUUCAACAACUUAG	11712-11826	-40.5
240	>FJ882951.1_240	UGUCUGACGUAAAGUGCACAUCUGUGGUACUGCUCUCGGUUCUUCAACAACUUAGAGUAGAGUCAUCUUCUAAAUUGUGGGCACAAUGUGUACA	11772-11865	-27.5
241	>FJ882951.1_241	GGCACAAUGUGUACAACUCCACAAUGAUAUUCUUCUUGCAAAAGACACAACUGAAGCUUUCGAGAAGAUGGUUUCUCUUUUGUCUGUUUUGCUAUCCAUGCAGGGUGCU	11851-11959	-29.4
242	>FJ882951.1_242	CUCCACAAUGAUAUUCUUCUUGCAAAAGACACAACUGAAGCUUUCGAGAAGAUGGUUUCUCUUUUGUCUGUUUUGCUAUCCAUGCAGGGUGCUGUAGACAUUAAUAG	11867-11973	-29.5
243	>FJ882951.1_243	UGCAGGGUGCUGUAGACAUUAAUAGGUUGUGCGAGGAAAUGCUCGAUAACCGUGCUACUCUUCA	11949-12012	-16.1
244	>FJ882951.1_244	CUUCAGGCUAUUGCUUCAGAAUUUAGUUCUUUACCAUCAUAUGCCGCUUAUGCCACUGCCCAAGAGGCCUAUGAGCAGGCUGUAGCUAAUGGUGAUUCUGAAG	12008-12110	-32.8
245	>FJ882951.1_245	GGCUAUUGCUUCAGAAUUUAGUUCUUUACCAUCAUAUGCCGCUUAUGCCACUGCCCAAGAGGCCUAUGAGCAGGCUGUAGCUAAUGGUGAUUCUGAAGUCGUUCUC	12013-12118	-36.5
246	>FJ882951.1_246	GCUUCAGAAUUUAGUUCUUUACCAUCAUAUGCCGCUUAUGCCACUGCCCAAGAGGCCUAUGAGCAGGCUGUAGCUAAUGGUGAUUCUGAAGUCGUUCUCAAAAAGU	12020-12125	-31.9
247	>FJ882951.1_247	UGAGCAGGCUGUAGCUAAUGGUGAUUCUGAAGUCGUUCUCAAAAAGUUAAAGAAAUCUUUGAAUGUGGCUAAAUCUGAGUUUGACCGUGAUGCUGCCAUGCAACG	12079-12183	-29.6
248	>FJ882951.1_248	UUUGAAUGUGGCUAAAUCUGAGUUUGACCGUGAUGCUGCCAUGCAACGCAAGUUGGAAAAGAUGGCAGAUCAGGCUAUGACCCAAAUGUACAAA	12136-12229	-28
249	>FJ882951.1_249	UGGCAGAUCAGGCUAUGACCCAAAUGUACAAACAGGCAAGAUCUGAGGACA	12198-12248	-12.7
250	>FJ882951.1_250	AUCAGGCUAUGACCCAAAUGUACAAACAGGCAAGAUCUGAGGACAAGAGGGCAAAAGUAACUAGUGCUAUGCAAACAAUGCUCUUCACUAUGCUUAGGAAGCUUGAU	12204-12310	-24.6
251	>FJ882951.1_251	GUGCUAUGCAAACAAUGCUCUUCACUAUGCUUAGGAAGCUUGAUAAUGAUGCACUUAACAACAUUAUCAACAAUGCGCGUGAUGGUUGUGUUCCACUCAACAU	12267-12369	-25.7
252	>FJ882951.1_252	AUUAUCAACAAUGCGCGUGAUGGUUGUGUUCCACUCAACAUCAUACCAUUGACUACAGCAGCCAAACUCAUGGUUGUUGUCCCUGAUUAUGGUACCUACAAGAACACUUGUGAUGGU	12329-12445	-23.7
253	>FJ882951.1_253	UUGUUGUCCCUGAUUAUGGUACCUACAAGAACACUUGUGAUGGUAACACCUUUACAUAUGCAUCUGCACUCUGGGAAAUCCAGCAA	12402-12487	-22.4
254	>FJ882951.1_254	UUGUUGUCCCUGAUUAUGGUACCUACAAGAACACUUGUGAUGGUAACACCUUUACAUAUGCAUCUGCACUCUGGGAAAUCCAGCAAGUUGUUGAUGCGGAUAGCAA	12402-12507	-24.6
255	>FJ882951.1_255	UGCAUCUGCACUCUGGGAAAUCCAGCAAGUUGUUGAUGCGGAUAGCAAGAUUGUUCAACUUAGUGAAAUUAACAUGGACAAUUCA	12460-12544	-16.4
256	>FJ882951.1_256	GCACUCUGGGAAAUCCAGCAAGUUGUUGAUGCGGAUAGCAAGAUUGUUCAACUUAGUGAAAUUAACAUGGACAAUUCACCAAAUUUGGCUUGGCCUCUUAUUGU	12467-12570	-23.1
257	>FJ882951.1_257	ACUUAGUGAAAUUAACAUGGACAAUUCACCAAAUUUGGCUUGGCCUCUUAUUGUUACAGCUCUAAGAGCCAACUCAGCUGUUAAACUACAGAAUAAUGAACUGAGU	12517-12622	-23.8
258	>FJ882951.1_258	GCUUGGCCUCUUAUUGUUACAGCUCUAAGAGCCAACUCAGCUGUUAAACUACAGAAUAAUGAACUGAGUCCAGU	12554-12627	-16.5
259	>FJ882951.1_259	ACUCAGCUGUUAAACUACAGAAUAAUGAACUGAGUCCAGUAGCACUACGACAGAUGUCCUGUGCGGCUGGUACCACACAAACAGCUUGU	12588-12676	-21.1
260	>FJ882951.1_260	UAGCACUACGACAGAUGUCCUGUGCGGCUGGUACCACACAAACAGCUUGUACUGAUGACAAUGCACUUGCCUACUAUAACAAUUCGAAGGGAGGUAGGUUUGUGCUG	12627-12733	-28.2
261	>FJ882951.1_261	UGUACUGAUGACAAUGCACUUGCCUACUAUAACAAUUCGAAGGGAGGUAGGUUUGUGCUGGCAUUACUAUCAGACCA	12674-12750	-23.9
262	>FJ882951.1_262	AGGGAGGUAGGUUUGUGCUGGCAUUACUAUCAGACCACCAAGAUCUCAAAUGGGCUAGAUUCCCUAAGAGUGAUGGUACAGGUACAAUUUACGCAGAACUGGAACCACCUU	12714-12824	-27.8
263	>FJ882951.1_263	GAGGUAGGUUUGUGCUGGCAUUACUAUCAGACCACCAAGAUCUCAAAUGGGCUAGAUUCCCUAAGAGUGAUGGUACAGGUACAAUUUACGCAGAACUGGAACCACCUU	12717-12824	-31.8
264	>FJ882951.1_264	GGCCUAAAGUGAAAUACUUGUACUUCAUCAAAGGCUUAAACAACCUAAAUAGAGGUAUGGUGCUGGGCAGUUUAGCUGCUACAGUACGUCUUCAGGCU	12852-12949	-28.1
265	>FJ882951.1_265	GGCAGUUUAGCUGCUACAGUACGUCUUCAGGCUGGAAAUGCUACAGAAGUACCUGCCAAUUCAACUGUGCUUUCCUUCUGUGCUUUUGCAGUAGACCCUGCU	12917-13018	-36.5
266	>FJ882951.1_266	ACAGAAGUACCUGCCAAUUCAACUGUGCUUUCCUUCUGUGCUUUUGCAGUAGACCCUGCUAAAGCAUAUAAGGAUUACCUAGCAAGUGGAGGACAACCAAUCACCAACUGU	12959-13069	-38.9
267	>FJ882951.1_267	CACACUGGUACAGGACAGGCAAUUACUGUAACACCAGAAGCUAACAUGGACCAAGAGUCCUUUGGUGGUGCUUCAUGUUGUCUGUAUUGUAGAUGCCACAUUG	13088-13190	-32.3
268	>FJ882951.1_268	GGUGCUUCAUGUUGUCUGUAUUGUAGAUGCCACAUUGACCAUCCAAAUCCUAAAGGAUUCUGUGACUUGAAAGGUAAGUACGUCCAAAUACCUACCACUUGUGCU	13154-13258	-25.8
269	>FJ882951.1_269	UAAGUACGUCCAAAUACCUACCACUUGUGCUAAUGACCCAGUGGGUUUUACACUUA	13228-13283	-11.6
270	>FJ882951.1_270	CAGUCUGUACCGUCUGCGGAAUGUGGAAAGGUUAUGGCUGUAGUUGUGACCAACUCCGCGAACCCUUGAUGCAGUCUG	13290-13367	-27
271	>FJ882951.1_271	GCUGUAGUUGUGACCAACUCCGCGAACCCUUGAUGCAGUCUGCGGAUGCAUCAACGUUUUUAAACGGGUUUGCGGUGUAAGUGCAGC	13326-13412	-32.9
272	>FJ882951.1_272	UUAAACGGGUUUGCGGUGUAAGUGCAGCCCGUCUUACACCGUGCGGCACAGGCACUAGUACUGAUGUCGUCUACAGGGCUUUUGAUAUUUACAACGAAAAAGUUGCUGG	13385-13493	-30.3
273	>FJ882951.1_273	GUCUUACACCGUGCGGCACAGGCACUAGUACUGAUGUCGUCUACAGGGCUUUUGAUAUUUACAACGAAAAAGUUGCUGGUUUUGCAAAGUUCCUAAAAAC	13415-13514	-24.4
274	>FJ882951.1_274	AAAAAGUUGCUGGUUUUGCAAAGUUCCUAAAAACUAAUUGCUGUCGCUUCCAGGAGAAGGAUGAGGAAGGCAAUUUAUU	13481-13559	-18
275	>FJ882951.1_275	GGAUGAGGAAGGCAAUUUAUUAGACUCUUACUUUGUAGUUAAGAGGCAUACUAUGUCUAACUACCAACAUGAAGAGACUAUUUAUAACUUGGUUAAAGAUUGUCC	13539-13643	-24.9
276	>FJ882951.1_276	AGCGGUUGCUGUCCAUGACUUUUUCAAGUUUAGAGUAGAUGGUGACAUGGUACCACAUAUAUCACGUCAGCGUCUAACUAAAUACACAAUGGCUGAUUUAGUCUAUGCU	13644-13752	-35.3
277	>FJ882951.1_277	AUAUAUCACGUCAGCGUCUAACUAAAUACACAAUGGCUGAUUUAGUCUAUGCUCUACGUCAUUUUGAUGAGGGUAAUUGUGAUACAU	13700-13786	-18
278	>FJ882951.1_278	UAUAUCACGUCAGCGUCUAACUAAAUACACAAUGGCUGAUUUAGUCUAUGCUCUACGUCAUUUUGAUGAGGGUAAUUGUGAUACAUUAAAAGAAAUACUCGUCACAUA	13701-13808	-23.5
279	>FJ882951.1_279	CUCUACGUCAUUUUGAUGAGGGUAAUUGUGAUACAUUAAAAGAAAUACUCGUCACAUACAAUUGCUGUGAUGAUGAUUAUUUCAAUAAGAAGGAUUGGUAUGACUUCGUAGAG	13751-13863	-25.5
280	>FJ882951.1_280	GUAUGACUUCGUAGAGAAUCCUGACAUCUUACGCGUAUAUGCUAACUUAGGUGAGCGUGUACGCCAAUCAUUAUUAAAGACUGUACAAUUCUGCGAUGCUAUGC	13848-13951	-33.4
281	>FJ882951.1_281	GUACGCCAAUCAUUAUUAAAGACUGUACAAUUCUGCGAUGCUAUGCGUGAUGCAGGCAUUGUAGGCGUAC	13906-13975	-21.3
282	>FJ882951.1_282	AUUCUGCGAUGCUAUGCGUGAUGCAGGCAUUGUAGGCGUACUGACAUUAGAUAAUCAGGAU	13935-13995	-18
283	>FJ882951.1_283	GUACUGACAUUAGAUAAUCAGGAUCUUAAUGGGAACUGGUACGAUUUCGGUGAUUUCGUACAAGUAGCACCAGGCUGCGGAGUUCCUAUUGUGGAUUCAUAUUAC	13972-14076	-29.6
284	>FJ882951.1_284	CAUUAGAUAAUCAGGAUCUUAAUGGGAACUGGUACGAUUUCGGUGAUUUCGUACAAGUAGCACCAGGCUGCGGAGUUCCUAUUGUGGAUUCAUAUUACUCAUUGCUGAUG	13979-14088	-32.3
285	>FJ882951.1_285	GAGUUCCUAUUGUGGAUUCAUAUUACUCAUUGCUGAUGCCCAUCCUCACUUUGAUUAGGGCAUUGGCUGCUGAGUCCCAUAUGGAUGCUGAUCUCGCAAAACCACUU	14051-14157	-36.5
286	>FJ882951.1_286	GGCAUUGGCUGCUGAGUCCCAUAUGGAUGCUGAUCUCGCAAAACCACUUAUUAAGUGGGAUCUGCU	14109-14174	-17.3
287	>FJ882951.1_287	UACGGAAGAGAGACUUUGUCUCUUCGACCGUUAUUUUAAAUAUUGGGACCAGACAUACCAUCCCAAUUGUAUUAACUGUUUGGAUGAUAGGUGUAUCCUUCAUUG	14187-14291	-29.3
288	>FJ882951.1_288	GACCGUUAUUUUAAAUAUUGGGACCAGACAUACCAUCCCAAUUGUAUUAACUGUUUGGAUGAUAGGUGUAUCCUUCAUUGUGCAAACUUUAAUGUGUU	14212-14309	-24.6
289	>FJ882951.1_289	UUUCUACUGUGUUUCCACCUACAAGUUUUGGACCACUAGUAAGAAAAAUAUUUGUAGAUGGUGUUCCUUUUGUUGUUUCAACUGGAUACCAUUUUCGUGAGUUAGGAG	14312-14419	-26.8
290	>FJ882951.1_290	AACUUUUAGUGUAUGCUGCUGAUCCAGCUAUGCAUGCAGCUUCUGGCAAUUUAUUGCUAGAUAAACGCACUACAUGCUUUUCAGUAGCUGCACUAACAAACAAUGUU	14471-14577	-40.7
291	>FJ882951.1_291	GUUUCAAGGAACUUUUAGUGUAUGCUGCUGAUCCAGCUAUGCAUGCAGCUUCUGGCAAUUUAUUGCUAGAUAAACGCACUACAUGCUUUUCAGUAGCUGCACUAACAAAC	14462-14571	-39.3
292	>FJ882951.1_292	GCUUUUCAGUAGCUGCACUAACAAACAAUGUUGCUUUUCAAACUGUCAAACCCGGUAAUUUUAAUAAAGACUUUUAUGACUUUGCUGUGUCUAAAGGU	14546-14643	-14.7
293	>FJ882951.1_293	GCUUUUCAAACUGUCAAACCCGGUAAUUUUAAUAAAGACUUUUAUGACUUUGCUGUGUCUAAAGGU	14578-14643	-11.7
294	>FJ882951.1_294	AGGUUUCUUUAAGGAAGGAAGUUCUGUUGAACUAAAACACUUCUUCUUUGCUCAGGAUGGCAACGCUGCUAUCAGUGAUUAUGACUAUUAUCGUUAUAAUCU	14640-14741	-22.2
295	>FJ882951.1_295	AUGACUAUUAUCGUUAUAAUCUGCCAACAAUGUGUGAUAUCAGACAACUCCUAUUCGUAGUUGAAGUUGUUGAUAAAUACUUUGAUUGUUACGAUGGUGGCUGU	14720-14823	-23.6
296	>FJ882951.1_296	UAGUUGAAGUUGUUGAUAAAUACUUUGAUUGUUACGAUGGUGGCUGUAUUAAUGCCAACCAAGUAAUCGUUAACAAUCUGGAUAAAUCAGCUG	14777-14869	-22.9
297	>FJ882951.1_297	AGUUGAAGUUGUUGAUAAAUACUUUGAUUGUUACGAUGGUGGCUGUAUUAAUGCCAACCAAGUAAUCGUUAACAAUCUGGAUAAAUCAGCUGGUUUCCCAUU	14778-14879	-24.7
298	>FJ882951.1_298	UGCCAACCAAGUAAUCGUUAACAAUCUGGAUAAAUCAGCUGGUUUCCCAUUUAAUAAAUGGGGUAAGGCUAGACUUUAUUAUGACUCAAUGAGUUAUGAGGAUCA	14829-14933	-28.3
299	>FJ882951.1_299	GGCUAGACUUUAUUAUGACUCAAUGAGUUAUGAGGAUCAAGAUGCACUUUUCGCGUAUACUAAGCGUAAUGUCAUCCCUACUAUAACUCAAAUGAAUCUUAAGUAUGCC	14895-15003	-31.3
300	>FJ882951.1_300	UACUAAGCGUAAUGUCAUCCCUACUAUAACUCAAAUGAAUCUUAAGUAUGCCAUUAGUGCAAAGAAUAGAGCUCGCACCGUAGCUGGUGUCUCUAUCUGUAGUA	14952-15055	-26.9
301	>FJ882951.1_301	UUAGUGCAAAGAAUAGAGCUCGCACCGUAGCUGGUGUCUCUAUCUGUAGUACUAUGACAAAUAGACAGUUUCAUCAGAAAUUAUUGAAGUCAAUAGCCGCCACUAG	15005-15110	-24
302	>FJ882951.1_302	UAGACAGUUUCAUCAGAAAUUAUUGAAGUCAAUAGCCGCCACUAGAGGAGCUACUGUGGUAAUUGGAACAAGCAAGUUUUACGGUGGCUGGCAUAAUAUGUUAAAAACUGUUUA	15066-15179	-33.5
303	>FJ882951.1_303	ACACCUUAUGGGUUGGGAUUAUCCAAAAUGUGACAGAGCCAUGCCUAACAUGCUUAGGAUAAUGGCCUCUCUUGUUCUUGCUCGCAAACAUAACACUUGCUGU	15198-15300	-26.4
304	>FJ882951.1_304	UGUUCUUGCUCGCAAACAUAACACUUGCUGUAACUUAUCACACCGUUUCUACAGGUUAGCUAACGAGUGUGCGCAAGUAUUAAGUGAGAUGGUCA	15270-15364	-28
305	>FJ882951.1_305	UGCUCGCAAACAUAACACUUGCUGUAACUUAUCACACCGUUUCUACAGGUUAGCUAACGAGUGUGCGCAAGUAUUAAGUGAGAUGGUCAUGUGUGGCGGCUCA	15276-15378	-32
306	>FJ882951.1_306	GCGCAAGUAUUAAGUGAGAUGGUCAUGUGUGGCGGCUCACUAUAUGUUAAACCAGGUGGAACAUCAUCCGGUGAUGCUACAACUGCUUAUGCUAAUAGUGU	15340-15440	-27.4
307	>FJ882951.1_307	GCAAGUAUUAAGUGAGAUGGUCAUGUGUGGCGGCUCACUAUAUGUUAAACCAGGUGGAACAUCAUCCGGUGAUGCUACAACUGCUUAUGCUAAUAGUGU	15342-15440	-28.8
308	>FJ882951.1_308	UGGUCAUGUGUGGCGGCUCACUAUAUGUUAAACCAGGUGGAACAUCAUCCGGUGAUGCUACAACUGCUUAUGCUAAUAGUGUCUUUAACAUUUGUCAAGCUGUUACAGCCA	15359-15469	-30.1
309	>FJ882951.1_309	UGCUAAUAGUGUCUUUAACAUUUGUCAAGCUGUUACAGCCAAUGUAAAUGCACUUCUUUCA	15429-15489	-15.5
310	>FJ882951.1_310	GUCUUUAACAUUUGUCAAGCUGUUACAGCCAAUGUAAAUGCACUUCUUUCAACUGAUGGUAAUAAGAUAGCUGACAAGUAUGUCCGCAAUCUACAACACAGGC	15439-15541	-24.6
311	>FJ882951.1_311	GCACUUCUUUCAACUGAUGGUAAUAAGAUAGCUGACAAGUAUGUCCGCAAUCUACAACACAGGCUCUAUGAGUGU	15478-15552	-22.3
312	>FJ882951.1_312	CCGCAAUCUACAACACAGGCUCUAUGAGUGUCUCUAUAGAAAUAGGGAUGUUGAUCAUGAAUUCGUGG	15522-15589	-16.7
313	>FJ882951.1_313	UAUAGAAAUAGGGAUGUUGAUCAUGAAUUCGUGGAUGAGUUUUACGCUUACCUGCGUAAACAUUUCUCCAUGAUGAUUCUUUCUGAUGAUGCCGUUGUGUGCUAUA	15556-15661	-34
314	>FJ882951.1_314	AUUCUUUCUGAUGAUGCCGUUGUGUGCUAUAACAGUAACUAUGCGGCUCAAGGUUUAGUAGCUAGCAUUAAGAACUUUAAGGCAGUUCUUUAUUAUCAAAACAAU	15631-15735	-24.8
315	>FJ882951.1_315	UAAGGCAGUUCUUUAUUAUCAAAACAAUGUGUUCAUGUCUGAGGCAAAAUGUUGGACUGAGACUGACCUUA	15708-15778	-19.1
316	>FJ882951.1_316	CAUGUCUGAGGCAAAAUGUUGGACUGAGACUGACCUUACUAAAGGACCUCACGAAUUUUGCUCACAGCAUACAAUGCUAGUUAAACAAGGAGAUGAUUACGUG	15741-15843	-18
317	>FJ882951.1_317	UGAGGCAAAAUGUUGGACUGAGACUGACCUUACUAAAGGACCUCACGAAUUUUGCUCACAGCAUACAAUGCUAGUUAAACAAGGAGAUGAUUACGUGUACCUGCCUUA	15747-15854	-20.3
318	>FJ882951.1_318	ACAGCAUACAAUGCUAGUUAAACAAGGAGAUGAUUACGUGUACCUGCCUUACCCAGAUCCAUCAAGAAUAUUAGGCGCAGGCUGU	15804-15888	-20.4
319	>FJ882951.1_319	GCCUUACCCAGAUCCAUCAAGAAUAUUAGGCGCAGGCUGUUUUGUCGAUGAUAUUGUCAAAACAGAUGGUACACUUAUGAUUGAAAGGUUCGUGUCACUGGC	15849-15950	-28.2
320	>FJ882951.1_320	GUCAAAACAGAUGGUACACUUAUGAUUGAAAGGUUCGUGUCACUGGCUAUUGAUGCUUACCCACUUACAAAACAUCCUAAUCAGGAGUAUGCUGAUGUCUUUCAC	15904-16008	-24.9
321	>FJ882951.1_321	UCGUGUCACUGGCUAUUGAUGCUUACCCACUUACAAAACAUCCUAAUCAGGAGUAUGCUGAUGUCUUUCACUUGUAUUUACAAUACAUUAGAAAGUUACAUGA	15938-16040	-25.1
322	>FJ882951.1_322	UGGCUAUUGAUGCUUACCCACUUACAAAACAUCCUAAUCAGGAGUAUGCUGAUGUCUUUCACUUGUAUUUACAAUACAUUAGAAAGUUACAUGAUGAGCUUACUGGCCA	15947-16055	-28.9
323	>FJ882951.1_323	GGAGUAUGCUGAUGUCUUUCACUUGUAUUUACAAUACAUUAGAAAGUUACAUGAUGAGCUUACUGGCCACAUGUUGGACAUGUAUUCC	15987-16074	-23.5
324	>FJ882951.1_324	UACAUGAUGAGCUUACUGGCCACAUGUUGGACAUGUAUUCCGUAAUGCUAACUAAUGAUAACACCUCACGGUACUGGGAACCUGAGUUUUAUGAGGCUAUGUA	16034-16136	-24.2
325	>FJ882951.1_325	UACUGGCCACAUGUUGGACAUGUAUUCCGUAAUGCUAACUAAUGAUAACACCUCACGGUACUGGGAACCUGAGUUUUAUGAGGCUAUGUA	16047-16136	-26.2
326	>FJ882951.1_326	GGUACUGGGAACCUGAGUUUUAUGAGGCUAUGUACACACCACAUACAGUCUUGCAGGCUGUAGGUGUUUGUGUAUUGUGCAAUUCACAGACUUCACUUCGUUGCGGUGCC	16103-16212	-45.5
327	>FJ882951.1_327	GUUUGUGUAUUGUGCAAUUCACAGACUUCACUUCGUUGCGGUGCCUGUAUUAGGAGACCAUUCCUAUGUUGCAAGUGCUGCUAUGACCAUGUCAUUUCAACAUCACACAAAU	16168-16279	-31.4
328	>FJ882951.1_328	ACAGACUUCACUUCGUUGCGGUGCCUGUAUUAGGAGACCAUUCCUAUGUUGCAAGUGCUGCUAUGACCAUGUCAUUUCAACAUCACACAAAUUAGUGUUGUCUGU	16188-16292	-30.1
329	>FJ882951.1_329	UGAUGUCACUGAUGUGACACAACUGUAUCUAGGAGGUAUGAGCUAUUAUUGCAAGUCACAUAAGCCUCCCAUUA	16323-16396	-18.5
330	>FJ882951.1_330	GUCACUGAUGUGACACAACUGUAUCUAGGAGGUAUGAGCUAUUAUUGCAAGUCACAUAAGCCUCCCAUUAGUUUUCCAUUAUGUGC	16327-16412	-22.3
331	>FJ882951.1_331	UAAUGGUCAGGUUUUUGGUUUAUACAAAAACACAUGUGUAGGCAGUGACAAUGUCACUGACUUCAAUGCGAUAGCAACAUGUGAUUGGACUAAUGCUGGCGAUUA	16413-16517	-32.5
332	>FJ882951.1_332	ACAUGUGUAGGCAGUGACAAUGUCACUGACUUCAAUGCGAUAGCAACAUGUGAUUGGACUAAUGCUGGCGAUUACAUACUUGCCAACACUUGU	16444-16536	-27.9
333	>FJ882951.1_333	CUGAGAGACUCAAGCUUUUCGCAGCAGAAACGCUCAAAGCCACUGAGGAAACAUUUAAGCUGUCAUAUGGUAUUGCUACUGUACGCGAAGUACUCUCUGACAG	16538-16640	-30.3
334	>FJ882951.1_334	UCAAAGCCACUGAGGAAACAUUUAAGCUGUCAUAUGGUAUUGCUACUGUACGCGAAGUACUCUCUGACAGAGAAUUGCAUCUUUCAUGGGAAGUUGG	16571-16667	-30.2
335	>FJ882951.1_335	UACGCGAAGUACUCUCUGACAGAGAAUUGCAUCUUUCAUGGGAAGUUGGAAAACCUAGACCACCAUUGAACAGAAACUAUGUCUUUACUGGUUACCGUGUA	16619-16719	-27.7
336	>FJ882951.1_336	CACCAUUGAACAGAAACUAUGUCUUUACUGGUUACCGUGUAACUAAAAAUAGUAAAGUACAGAUUGGAGAGUACACCUUUGAAAAAGGUGACUAUGGUG	16679-16777	-20
337	>FJ882951.1_337	GUAAAGUACAGAUUGGAGAGUACACCUUUGAAAAAGGUGACUAUGGUGAUGCUGUUGUGUAC	16730-16791	-15.3
338	>FJ882951.1_338	GGUACUACGACAUACAAGUUGAAUGUUGGUGAUUACUUUGUGUUGACAUCUCACACUGUAAUGCCACUUAGUGCACCUACUCUAGUGCC	16795-16883	-27
339	>FJ882951.1_339	UGUUGGUGAUUACUUUGUGUUGACAUCUCACACUGUAAUGCCACUUAGUGCACCUACUCUAGUGCCACAAGAGCACUAUGUGAGAAUUACUGGCUUGUACCCAACA	16818-16923	-35.7
340	>FJ882951.1_340	UUGUACCCAACACUCAACAUCUCAGAUGAGUUUUCUAGCAAUGUUGCAAAUUAUCAAAAGGUCGGCAUGCAA	16912-16983	-13.4
341	>FJ882951.1_341	GCAAAUUAUCAAAAGGUCGGCAUGCAAAAGUACUCUACACUCCAAGGACCACCUGGUACUGGUAAGAGUCAUUUUGCCAUCGGACUUGCUCUCUAUUACCCAUCUGC	16957-17063	-32.4
342	>FJ882951.1_342	GGCAUGCAAAAGUACUCUACACUCCAAGGACCACCUGGUACUGGUAAGAGUCAUUUUGCCAUCGGACUUGCUCUCUAUUACCCAUCUGCUCGCAUAGUGUAUACGGCAUGCU	16975-17086	-35.7
343	>FJ882951.1_343	UUGCUCUCUAUUACCCAUCUGCUCGCAUAGUGUAUACGGCAUGCUCUCAUGCAGCUGUUGAUGCCCUAUGUGAAAAGGCAUUAAAAUAUUUGCCCAUAGAUAAA	17042-17145	-28.8
344	>FJ882951.1_344	CAUACCUGCGCGUGCGCGCGUAGAGUGUUUUGAUAAAUUCAAAGUGAAUUCAACACUAGAACAGUAUGUUUUCUGCACUGUAAAUGCAUUG	17157-17247	-24.3
345	>FJ882951.1_345	UCAAAGUGAAUUCAACACUAGAACAGUAUGUUUUCUGCACUGUAAAUGCAUUGCCAGAAACAACUGCUGACAUUGUAGUCUUUGAUGAAAUCUCUAUGG	17195-17293	-24.9
346	>FJ882951.1_346	GAUAAAUUCAAAGUGAAUUCAACACUAGAACAGUAUGUUUUCUGCACUGUAAAUGCAUUGCCAGAAACAACUGCUGACAUUGUAGUCUUUGAUGAAAUC	17188-17286	-29.1
347	>FJ882951.1_347	AUUGCCAGAAACAACUGCUGACAUUGUAGUCUUUGAUGAAAUCUCUAUGGCUACUAAUUAUGACUUGAGUGUUGUCAAUGCUAGACUUCGUGCAAAACACUACGUCUAUAUUGGCGAU	17244-17361	-32.4
348	>FJ882951.1_348	UUGAGUGUUGUCAAUGCUAGACUUCGUGCAAAACACUACGUCUAUAUUGGCGAUCCUGCUCAAUUACCAG	17308-17377	-15.3
349	>FJ882951.1_349	ACACUACGUCUAUAUUGGCGAUCCUGCUCAAUUACCAGCCCCCCGCACAUUGCUGACUAAAGGCACACUAGAACCAGAAUAUUUUAAUUCAGUGU	17340-17434	-25.7
350	>FJ882951.1_350	UGACUAAAGGCACACUAGAACCAGAAUAUUUUAAUUCAGUGUGCAGACUUAUGAAAACAAUAGGUCCAGACAUGUUCCUUGGAACUUGUCG	17393-17483	-20.7
351	>FJ882951.1_351	UAAAGGCACACUAGAACCAGAAUAUUUUAAUUCAGUGUGCAGACUUAUGAAAACAAUAGGUCCAGACAUGUUCCUUGGAACUUGUCGCCGUUGUCCUG	17397-17494	-19.8
352	>FJ882951.1_352	CAGUGUGCAGACUUAUGAAAACAAUAGGUCCAGACAUGUUCCUUGGAACUUGUCGCCGUUGUCCUGCUGAAAUUGUUGACACUG	17429-17512	-18.1
353	>FJ882951.1_353	GUUCCUUGGAACUUGUCGCCGUUGUCCUGCUGAAAUUGUUGACACUGUGAGUGCUUUAGUUUAUGACAAUAAGCUAAAAGCACACAAGGAUAAGUCAGCUCAAUGC	17466-17571	-28.5
354	>FJ882951.1_354	AAGGUGUUAUUACACAUGAUGUUUCAUCUGCAAUCAACAGACCUCAAAUAGGCGUUGUAAGAGAAUUUCUU	17588-17658	-14.8
355	>FJ882951.1_355	GGAUUGCCUACGCAGACUGUUGAUUCAUCACAGGGUUCUGAAUAUGACUAUGUCAUAUUCACACAAACUACUGAAACAGCACACUCUUGUAAUGUCAACC	17737-17836	-33.2
356	>FJ882951.1_356	UCAUAUUCACACAAACUACUGAAACAGCACACUCUUGUAAUGUCAACCGCUUCAAUGUGGCUAUCACAAGGGCAAAAAUUGGCAUUUUGUGCAUAAUGUCUGAUAGA	17789-17895	-25.9
357	>FJ882951.1_357	AUGUGGCUAUCACAAGGGCAAAAAUUGGCAUUUUGUGCAUAAUGUCUGAUAGAGAUCUUUAUGACAAACUGCAAUUUACAAGUCUAGAAAUACCACGU	17843-17940	-27.8
358	>FJ882951.1_358	UGACAAACUGCAAUUUACAAGUCUAGAAAUACCACGUCGCAAUGUGGCUACAUUACAAGCAGAAAAUGUAACUGGACUUUUUAAGGACUGUAGUAAGAUCA	17904-18004	-21.7
359	>FJ882951.1_359	CUGGUCUUCAUCCUACACAGGCACCUACACACCUCAGCGUUGAUAUAAAGUUCAAGACUGAAGGAUUAUGUGUUGACAUACCAG	18008-18091	-23.4
360	>FJ882951.1_360	UUGACAUACCAGGCAUACCAAAGGACAUGACCUACCGUAGACUCAUCUCUAUGAUGGGUUUCAAAAUGAAUUACCAAGUCAA	18080-18161	-20.1
361	>FJ882951.1_361	ACCGUAGACUCAUCUCUAUGAUGGGUUUCAAAAUGAAUUACCAAGUCAAUGGU	18113-18165	-11.5
362	>FJ882951.1_362	UGUUUAUCACCCGCGAAGAAGCUAUUCGUCACGUUCGUGCGUGGAUUGGCUUUGCCGUAGCCGGCUGUCAUGCAACUAGAGAUGCUGUGGGUACUAACCUA	18176-18276	-30.2
363	>FJ882951.1_363	CGUAGCCGGCUGUCAUGCAACUAGAGAUGCUGUGGGUACUAACCUACCUCUCCAGCUAGGAUUUUCUACAGGUGUUAACUUAGUAGCUGUACCGACUGGUUAUG	18231-18334	-34.2
364	>FJ882951.1_364	GGUGUUAACUUAGUAGCUGUACCGACUGGUUAUGUUGACACUGAAAAUAACACAGAAUUCACCAGAGUUAAUGCAAAACCUCCACCAGGUGACCAGUUUAAACAUCUUAUACC	18301-18413	-27.8
365	>FJ882951.1_365	UGUACCGACUGGUUAUGUUGACACUGAAAAUAACACAGAAUUCACCAGAGUUAAUGCAAAACCUCCACCAGGUGACCAGUUUAAACAUCUUAUACCACUCAUGUAUA	18318-18424	-29.5
366	>FJ882951.1_366	CACCAGGUGACCAGUUUAAACAUCUUAUACCACUCAUGUAUAAAGGCUUGCCCUGGAAUGUAGUG	18383-18447	-16.8
367	>FJ882951.1_367	GGCUUGCCCUGGAAUGUAGUGCGUAUUAAGAUAGUACAAAUGCUCAGUGAUACACUGAAAGGAUUGUCAGACAGAGUCGUGUUCGUCCUUUGGGCGCAUGGCUUUGAGCU	18427-18536	-35.6
368	>FJ882951.1_368	ACACUGAAAGGAUUGUCAGACAGAGUCGUGUUCGUCCUUUGGGCGCAUGGCUUUGAGCUUACAUCAAUGAAGUACUUUGUCAAGAUUGGACCUGAAAGAACGUGU	18478-18582	-32.9
369	>FJ882951.1_369	UGAGCUUACAUCAAUGAAGUACUUUGUCAAGAUUGGACCUGAAAGAACGUGUUGUCUGUGUGACAAACGUGCAACUUGCUUUUCUACUUCAUCAGAUACUUA	18531-18632	-26.9
370	>FJ882951.1_370	GUCAAGAUUGGACCUGAAAGAACGUGUUGUCUGUGUGACAAACGUGCAACUUGCUUUUCUACUUCAUCAGAUACUUAUGCCUGCUGGAAUCAUUCUGUGGGUUUUGAC	18556-18663	-25.5
371	>FJ882951.1_371	UACUUCAUCAGAUACUUAUGCCUGCUGGAAUCAUUCUGUGGGUUUUGACUAUGUCUAUAACCCAUUUAUGAUUGAUGUUCAGCAGUGGGGCUUUACGGGUAACCUUCAGAGUA	18615-18727	-32.1
372	>FJ882951.1_372	UACUUCAUCAGAUACUUAUGCCUGCUGGAAUCAUUCUGUGGGUUUUGACUAUGUCUAUAACCCAUUUAUGAUUGAUGUUCAGCAGUGGGGCUUUACGGGUA	18615-18715	-32.1
373	>FJ882951.1_373	GACCAACAUUGCCAGGUACAUGGAAAUGCACAUGUGGCUAGUUGUGAUGCUAUCAUGACUAGAUGUUUAGCAGUCCAUGAGUGCUUUGUUAAGCGCGUUGAUUGGUC	18733-18839	-33.1
374	>FJ882951.1_374	UCAUGACUAGAUGUUUAGCAGUCCAUGAGUGCUUUGUUAAGCGCGUUGAUUGGUCUGUUGAAUACCCUAUUAUAGGAGAUGA	18785-18866	-27.2
375	>FJ882951.1_375	GAGGGUUAAUUCUGCUUGCAGAAAAGUACAACACAUGGUUGUGAAGUCUGCCCUC	18870-18924	-16.6
376	>FJ882951.1_376	AGUCUGCCCUCCUGGCUGAUAAGUUUCCAGUUCUUCAUGACAUUGGAAAUCCAAAGGCUAUCAAGUGUGUGCCUCAGGCU	18914-18993	-23.1
377	>FJ882951.1_377	UGGAAAUCCAAAGGCUAUCAAGUGUGUGCCUCAGGCUGAAGUAGAAUGGAAGUUCUACGAUGCUCAGCCAUGUAGUGACAAAGCUUACAAAAUAGAGGAGCUCUUCUA	18957-19064	-34.8
378	>FJ882951.1_378	UCAGCCAUGUAGUGACAAAGCUUACAAAAUAGAGGAGCUCUUCUAUUCUUAUGCUACACAUCACGAUAAAUUCACUGAUGGUGUUUGUUUGUUUUGGAAUUGUAACGUUGA	19020-19130	-26.3
379	>FJ882951.1_379	AUUGUAACGUUGAUCGUUACCCAGCCAAUGCAAUUGUGUGUAGGUUUGACACAAGAGUCUUGUCAAACUUGAACUUACCAGGCUGUGAUGGUGGUAGUUUGUAU	19118-19221	-25.7
380	>FJ882951.1_380	GAGUCUUGUCAAACUUGAACUUACCAGGCUGUGAUGGUGGUAGUUUGUAUGUGAAUAAGCAUGCAUUCCACACUCCAGCUUUCGAUAAAAGUGCAUUUACUAAUUU	19172-19277	-27.5
381	>FJ882951.1_381	AGCAAUUGCCUUUCUUUUACUAUUCUGAUAGUCCUUGUGAGUCUCAUGGCAAACAAGUAGUGUCGGAUAUUGAUUAUGUU	19280-19359	-18.2
382	>FJ882951.1_382	CAAGUAGUGUCGGAUAUUGAUUAUGUUCCACUCAAAUCUGCUACGUGUAUUACACGAUGCAAUUUAGGUGGUGCUGUUUGCAGACACCAUGCAAAUGAGUACCGACAGUACUUG	19333-19446	-35.4
383	>FJ882951.1_383	AAAUCUGCUACGUGUAUUACACGAUGCAAUUUAGGUGGUGCUGUUUGCAGACACCAUGCAAAUGAGUACCGACAGUACUUGGAUGCAUAUAAUAUGAUGAUUU	19366-19468	-31.1
384	>FJ882951.1_384	CCAUGCAAAUGAGUACCGACAGUACUUGGAUGCAUAUAAUAUGAUGAUUUCUGCUGGAUUUAGCCUAUGGAUUUACAAACAAUUUGAUACUUAUAACCUGUGG	19419-19521	-22.4
385	>FJ882951.1_385	CCUAUGGAUUUACAAACAAUUUGAUACUUAUAACCUGUGGAAUACAUUUACCAGGUUACAGAGUUUAGAAAAUGUGGCUUAUAAUGUUGUUAAUAAAGG	19482-19580	-25.6
386	>FJ882951.1_386	GUUUAGAAAAUGUGGCUUAUAAUGUUGUUAAUAAAGGACACUUUGAUGGACACGCCGGCGAAGCACCUGUUUCCAUCAUUAAUAAUGCUGUUUACACAAAGGUAGAU	19544-19650	-25.9
387	>FJ882951.1_387	CGAAGCACCUGUUUCCAUCAUUAAUAAUGCUGUUUACACAAAGGUAGAUGGUAUUGAUGUGGAGAUCUUUGAAAAUAAGACAACACUUCCUGUUAAUGUUGCAUUUGAGCUUUG	19602-19715	-25.8
388	>FJ882951.1_388	UGUGGAGAUCUUUGAAAAUAAGACAACACUUCCUGUUAAUGUUGCAUUUGAGCUUUGGGCUAAGCGUAACAUUAAACCAGUGCCAGAGAUUAAGAUACUCAAUA	19659-19762	-24.7
389	>FJ882951.1_389	GGUAUUGAUGUGGAGAUCUUUGAAAAUAAGACAACACUUCCUGUUAAUGUUGCAUUUGAGCUUUGGGCUAAGCGUAACAUUAAACCAGUGCCAGAGAUUAAGAUACU	19651-19757	-25.8
390	>FJ882951.1_390	AUAAGACAACACUUCCUGUUAAUGUUGCAUUUGAGCUUUGGGCUAAGCGUAACAUUAAACCAGUGCCAGAGAUUAAGAUACUCAAUAAUUUGGGUGUUGAUAU	19676-19778	-25.3
391	>FJ882951.1_391	UGGGCUAAGCGUAACAUUAAACCAGUGCCAGAGAUUAAGAUACUCAAUAAUUUGGGUGUUGAUAUCGCUGCUAAUACUGUAAUCUGGGACUA	19714-19805	-21
392	>FJ882951.1_392	UCAAUAAUUUGGGUGUUGAUAUCGCUGCUAAUACUGUAAUCUGGGACUAUAAAAGAGAAGCCCCAGCACAUGUAUCUACAAUAGGUGUCUGCACAAUGACUGA	19757-19859	-32.1
393	>FJ882951.1_393	GGACUAUAAAAGAGAAGCCCCAGCACAUGUAUCUACAAUAGGUGUCUGCACAAUGACUGACAUUGCCAAGAAACCUACUGAGAGUGCUUGUUCUUCACUUACUGUCU	19800-19906	-36.6
394	>FJ882951.1_394	CAUUGCCAAGAAACCUACUGAGAGUGCUUGUUCUUCACUUACUGUCUUGUUUGAUGGUAGAGUGGAAGGACAGGUAGACCUUUUUAGAAACGCCCGUAAUG	19860-19960	-29.4
395	>FJ882951.1_395	GUCUUGUUUGAUGGUAGAGUGGAAGGACAGGUAGACCUUUUUAGAAACGCCCGUAAUGGUGUUUUAAUAACAGAAGGUUCAGUCAAAGGUCUAACACCUUCAAAGGGAC	19903-20011	-35.4
396	>FJ882951.1_396	UCUAACACCUUCAAAGGGACCAGCACAAGCUAGCGUCAAUGGAGUCACAUUAAUUGGA	19992-20049	-11.8
397	>FJ882951.1_397	CAGCACAAGCUAGCGUCAAUGGAGUCACAUUAAUUGGAGAAUCAGUAAAAACACAGUUUAACUACUCUAAGAAAGUAGACGGCAUUAUUCAACAGUUGCCUG	20012-20113	-22.5
398	>FJ882951.1_398	AGAAUCAGUAAAAACACAGUUUAACUACUCUAAGAAAGUAGACGGCAUUAUUCAACAGUUGCCUGAAACCUACUUUACUCAGAGCAGAGACUUAGAGGAUUUU	20049-20151	-27
399	>FJ882951.1_399	GUUUAACUACUCUAAGAAAGUAGACGGCAUUAUUCAACAGUUGCCUGAAACCUACUUUACUCAGAGCAGAGACUUAGAGGAUUUUAAGC	20067-20155	-20.6
400	>FJ882951.1_400	GACUUUCUCGAGCUCGCUAUGGAUGAAUUCAUACAGCGAUAUAAGCUCGAGGGCUAUGCCUUCGAACACAUCGUUUAUGGAGAUUUCAGUCAUGGACAACUUGGCGGUC	20176-20284	-46.1
401	>FJ882951.1_401	GCUCGAGGGCUAUGCCUUCGAACACAUCGUUUAUGGAGAUUUCAGUCAUGGACAACUUGGCGGUCUUCAUUUAAUGAUAGGCUUAGCCAAGC	20220-20311	-35.8
402	>FJ882951.1_402	UAUGGACAGCACAGUGAAAAAUUACUUCAUAACAGAUGCGCAAACAGGUUCAUCAAAAUGUGUGUGUUCUGUGAUUGAUCUUUUACUUGAUGACUUUGUCGAGAUA	20352-20457	-28.9
403	>FJ882951.1_403	UUACUUGAUGACUUUGUCGAGAUAAUAAAGUCACAAGAUUUGUCAGUGAUUUCAAAAGUGGUCAAGGUUACAAUUGA	20434-20510	-17
404	>FJ882951.1_404	GGUCAAGGUUACAAUUGACUAUGCUGAGAUUUCAUUCAUGCUUUGGUGUAAGGACGGACAUGUUGAAACCUUCUACC	20493-20569	-18.4
405	>FJ882951.1_405	CUAUGCUGAGAUUUCAUUCAUGCUUUGGUGUAAGGACGGACAUGUUGAAACCUUCUACCCAAAACUACAAGCAAGUCAAGCGUGG	20511-20595	-23.1
406	>FJ882951.1_406	ACAUGUUGAAACCUUCUACCCAAAACUACAAGCAAGUCAAGCGUGGCAACCAGGUGUUGCGAUGCCUAACUUGUACAAGAUGCAAAGAAUGCUUCUUGAAAAGUGU	20550-20655	-34.3
407	>FJ882951.1_407	UGUGACCUUCAGAAUUAUGGUGAAAAUGCUGUUAUACCAAAAGGAAUAAUGAUGAAUGUCGCA	20653-20715	-19
408	>FJ882951.1_408	ACUUAAAUACACUUACUUUAGCUGUACCCUACAACAUGAGAGUUAUUCACUUUGGUGCUGGCUCUGAUAAAGGAGUUGCACCAGGUACAGCUGUGCUCAGACAAUGGU	20738-20845	-35.8
409	>FJ882951.1_409	UCUGAUAAAGGAGUUGCACCAGGUACAGCUGUGCUCAGACAAUGGUUGCCAACUGGCACACUACUUGUCGAUUCAGA	20800-20876	-19.5
410	>FJ882951.1_410	GGAGUUGCACCAGGUACAGCUGUGCUCAGACAAUGGUUGCCAACUGGCACACUACUUGUCGAUUCAGAUCUUAAUGACUUC	20809-20889	-19.2
411	>FJ882951.1_411	GUUGCACCAGGUACAGCUGUGCUCAGACAAUGGUUGCCAACUGGCACACUACUUGUCGAUUCAGAUCUUAAUGACUUCGUCUCCGAC	20812-20898	-21.5
412	>FJ882951.1_412	UUCUACUUUAAUUGGAGACUGUGCAACAGUACAUACGGCUAAUAAAUGGGACCUUAUUAUUAGCGAUAUGUAUGACCCUAGGACCAAACAUGUGACAA	20904-21001	-24.6
413	>FJ882951.1_413	AGAAUGACUCUAAAGAAGGGUUUUUCACUUAUCUGUGUGGAUUUAUAAAGCAAAAACUAGCCCUGGGUGGUUCU	21005-21078	-17.9
414	>FJ882951.1_414	AGCUGUAAAGAUAACAGAGCAUUCUUGGAAUGCUGACCUUUACAAGCUUAUGGGCCAUUUCUCAUGGUGGACAGCU	21081-21156	-16.2
415	>FJ882951.1_415	UGACCUUUACAAGCUUAUGGGCCAUUUCUCAUGGUGGACAGCUUUUGUUA	21114-21163	-14.7
416	>FJ882951.1_416	GGCCAUUUCUCAUGGUGGACAGCUUUUGUUACAAAUGUAAAUGCAUCAUCAUCGGAAGCAUUUUUAAUUGGGGCUAACUAUCUUGGCAAGCC	21133-21224	-30.1
417	>FJ882951.1_417	GGCCAUUUCUCAUGGUGGACAGCUUUUGUUACAAAUGUAAAUGCAUCAUCAUCGGAAGCAUUUUUAAUUGGGGCUAACUAUCUUGGCAAGCCGAAGGAACAAAUUGAUGGCU	21133-21244	-21.8
418	>FJ882951.1_418	GGCAAGCCGAAGGAACAAAUUGAUGGCUAUACCAUGCAUGCUAACUACAUUUUCUGGAGGAACACAAAUCCUAUCCAGUUGUC	21217-21299	-18
419	>FJ882951.1_419	AUUUUCUGGAGGAACACAAAUCCUAUCCAGUUGUCUUCCUAUUCACUCUUUGACAUGAGCAAAUUUCCUCUUAAAUUAAGAGGAACUGCUGUAAUGUCUCUUAAGGAGAAU	21265-21375	-29.5
420	>FJ882951.1_420	UUUCCUCUUAAAUUAAGAGGAACUGCUGUAAUGUCUCUUAAGGAGAAUCAAAUCAAUGAUAUGAUUUAUUCUCUUCUGGAAAAAGGUAGGCUUAUCAUUAGAGAAAA	21328-21434	-33.6
421	>FJ882951.1_421	GGUAGGCUUAUCAUUAGAGAAAACAACAGAGUUGUGGUUUCAAGUGAUAUUCUUGUUAACAACUAAACGAACAUGUUUAUUUUCUUAUUAUUUCUUACU	21412-21510	-23.3
422	>FJ882951.1_422	GAACAUGUUUAUUUUCUUAUUAUUUCUUACUCUCACUAGUGGUAGUGACCUUGACCGGUGCACCACUUUUGAUGAUGUUCAAGCUCCUAAUUACACUCAACAUACUUC	21480-21587	-25.5
423	>FJ882951.1_423	GACCGGUGCACCACUUUUGAUGAUGUUCAAGCUCCUAAUUACACUCAACAUACUUCAUCUAUGAGGGGGGUUUACUAUC	21532-21610	-18.3
424	>FJ882951.1_424	AACAUACUUCAUCUAUGAGGGGGGUUUACUAUCCUGAUGAAAUUUUUAGAUCAGACACUCUUUAUUUAACUCAGGAUUUAUUUCUUCCAUUUUAUUCUAAUGUU	21578-21681	-24.8
425	>FJ882951.1_425	UCUUUAUUUAACUCAGGAUUUAUUUCUUCCAUUUUAUUCUAAUGUUACAGGGUUUCAUACUAUUAAUCAUACGUUUGGCAACCCUGUCAUACCUUUUAAGGA	21636-21737	-16.6
426	>FJ882951.1_426	UGGCAACCCUGUCAUACCUUUUAAGGAUGGUAUUUAUUUUGCUGCCA	21711-21757	-13.3
427	>FJ882951.1_427	AGGAUGGUAUUUAUUUUGCUGCCACAGAGAAAUCAAAUGUUGUCCGUGGUUGGGUUUUUGGUUCUACCAUGAACAACAAGUCACAGUCGGUGAUUAUUAUUAACAAUUCU	21734-21843	-27.4
428	>FJ882951.1_428	GUCGGUGAUUAUUAUUAACAAUUCUACUAAUGUUGUUAUACGAGCAUGUAACUUUGAAUUGUGUGACAACCCUUUCUUUGCUGUUUCUAAACCCAUGGGUAC	21819-21920	-21.6
429	>FJ882951.1_429	UGUAACUUUGAAUUGUGUGACAACCCUUUCUUUGCUGUUUCUAAACCCAUGGGUACA	21865-21921	-13.4
430	>FJ882951.1_430	GGGUACACAGACACAUACUAUGAUAUUCGAUAAUGCAUUUAAUUGCACUUUCGAGUACAUAUCUGAUGCCU	21915-21985	-26.1
431	>FJ882951.1_431	GGGUACACAGACACAUACUAUGAUAUUCGAUAAUGCAUUUAAUUGCACUUUCGAGUACAUAUCUGAUGCCUUUUCGCUUGAUGUUUCAGAAAAGUCAGGUAAUU	21915-22018	-21.9
432	>FJ882951.1_432	AAUUGCACUUUCGAGUACAUAUCUGAUGCCUUUUCGCUUGAUGUUUCAGAAAAGUCAGGUAAUU	21955-22018	-14.1
433	>FJ882951.1_433	UGAUGCCUUUUCGCUUGAUGUUUCAGAAAAGUCAGGUAAUUUUAAACACUUACGAGAGUUUGUGUUUAAAAAUAAAGAUGGGUUUCUCUAUGUUUAUAAGGGCUAUCA	21978-22085	-29.3
434	>FJ882951.1_434	AUGUUUAUAAGGGCUAUCAACCUAUAGAUGUAGUUCGUGAUCUACCUUCUGGUUUUAACACUUUGAAACCUAUUUUUAAGUUGCCUCUUGGUAUUAACAU	22067-22166	-23
435	>FJ882951.1_435	CUAUAGAUGUAGUUCGUGAUCUACCUUCUGGUUUUAACACUUUGAAACCUAUUUUUAAGUUGCCUCUUGGUAUUAACAUUACAAAUUUUAG	22088-22178	-19.7
436	>FJ882951.1_436	UAUAGAUGUAGUUCGUGAUCUACCUUCUGGUUUUAACACUUUGAAACCUAUUUUUAAGUUGCCUCUUGGUAUUAACAUUACAAAUUUUAGAGCCAUUCUUA	22089-22189	-21.1
437	>FJ882951.1_437	UUUGGGGCACGUCAGCUGCAGCCUAUUUUGUUGGCUAUUUAAAGCCAACUACAUUUAUGCUCAAGUAUGAUGAAAAUGGUACAAUCACAGAUGCUGUUGAUUGUUCUCAAA	22214-22324	-33.1
438	>FJ882951.1_438	ACAGAUGCUGUUGAUUGUUCUCAAAAUCCACUUGCUGAACUCAAAUGCUCUGU	22300-22352	-12
439	>FJ882951.1_439	UCUCAAAAUCCACUUGCUGAACUCAAAUGCUCUGUUAAGAGCUUUGAGAUUGACAAAGGAAUUUACCAGACCUCUAAUUUCAGGGUUGUUCCCUCAGGAGAUGUUGUGAGA	22318-22428	-34.8
440	>FJ882951.1_440	GGAAUUUACCAGACCUCUAAUUUCAGGGUUGUUCCCUCAGGAGAUGUUGUGAGAUUCCCUAAUAUUACAAACUUGUGUCCUUUUGGAGAGGUUUUUAAUGCUACUAAAUUCC	22375-22486	-30.6
441	>FJ882951.1_441	AGAGGUUUUUAAUGCUACUAAAUUCCCUUCUGUCUAUGCAUGGGAGAGAAAAAAAAUUUCU	22461-22521	-15.2
442	>FJ882951.1_442	UUUUUCAACCUUUAAGUGCUAUGGCGUUUCUGCCACUAAGUUGAAUGA	22563-22610	-11.5
443	>FJ882951.1_443	CAGAUUCUUUUGUAGUCAAGGGAGAUGAUGUAAGACAAAUAGCGCCAGGACAAACUGGUGUUAUUGCUGAUUAUAAUUAUAAAUUGCCAGAUGAUUUCAUGGGUUG	22634-22739	-31.5
444	>FJ882951.1_444	UGCUGAUUAUAAUUAUAAAUUGCCAGAUGAUUUCAUGGGUUGUGUCCUUGCUUGGAAUACUAGGAACAUUGAUGCUACUUCAACUGGUAAUCAUAAUUAUAAAUAUAGGUA	22698-22808	-32
445	>FJ882951.1_445	AUAAUUAUAAAUAUAGGUAUCUUAGACAUGGCAAGCUUAGGCCCUUUGAGAGAGACAUAUCUAAUGUGCCUUUCUCCCCUGAUGGCAAACCUUGCACCCCACCUGCUCUUAAUUGU	22790-22905	-31.8
446	>FJ882951.1_446	ACCUGCUCUUAAUUGUUAUUGGCCAUUAAAUGAUUAUGGUUUUUACACCACUACUGGCAUUGGCUACCAACCUUACAGAGUUGU	22890-22973	-26.8
447	>FJ882951.1_447	GCAUUGGCUACCAACCUUACAGAGUUGUAGUACUUUCUUUUGAACUUUUAAAUGCACCGGCCACGGUUUGUGGACCAAAAUUAUCCACUGACCUUAUUAAGAACCAGUGU	22946-23055	-27.8
448	>FJ882951.1_448	UGACCUUAUUAAGAACCAGUGUGUCAAUUUUAAUUUUAAUGGACUCACUGGUACUGGUGUGUUA	23034-23097	-22.8
449	>FJ882951.1_449	CAGUGUGUCAAUUUUAAUUUUAAUGGACUCACUGGUACUGGUGUGUUAACUCCUUCUUCAAAGAGAUUUCAACCAUUUCAACAAUUUGGCCGUGAUGUUUCUGAUUUCACUG	23050-23161	-25.7
450	>FJ882951.1_450	GGUGUGUUAACUCCUUCUUCAAAGAGAUUUCAACCAUUUCAACAAUUUGGCCGUGAUGUUUCUGAUUUCACUGAUUCCGUUCGAGAUCCUAAAACAUC	23089-23186	-22.6
451	>FJ882951.1_451	ACCAUUUCAACAAUUUGGCCGUGAUGUUUCUGAUUUCACUGAUUCCGUUCGAGAUCCUAAAACAUCUGAAAUAUUAGACAUUUCGCCUUGCUCUUUUGGGGGUGU	23121-23225	-22.5
452	>FJ882951.1_452	AACAUCUGAAAUAUUAGACAUUUCGCCUUGCUCUUUUGGGGGUGUAAGUGUAAUUACACCUGGAACAAAUGCUUCAUCUGAAGUUGCUGUUCUAUAUCAAGAUGUU	23181-23286	-32.7
453	>FJ882951.1_453	UUGCUCUUUUGGGGGUGUAAGUGUAAUUACACCUGGAACAAAUGCUUCAUCUGAAGUUGCUGUUCUAUAUCAAGAUGUUAACUGCACUGAUGUUUCUACAGCAA	23208-23311	-35.3
454	>FJ882951.1_454	GUUAACUGCACUGAUGUUUCUACAGCAAUUCAUGCAGAUCAACUCACACCAGCUUGGCGCAUAUAUUCUACUGGAAACAAUGUAUUCCAGAC	23284-23375	-24.9
455	>FJ882951.1_455	CAGACUCAAGCAGGCUGUCUUAUAGGAGCUGAGCAUGUCGACACUUCUUAUGAGUGCGACAUUCCUAUUGGAGCUGGCAUUUG	23371-23453	-24.8
456	>FJ882951.1_456	GGCAUUUGUGCUAGUUACCAUACAGUUUCUUUAUUACGUAGUACUAGCCAAAAAUCUAUUGUGGCUUAUACUAUGUCUUUAGGUGCUGAUAGUUCAAUUGCU	23446-23547	-42.6
457	>FJ882951.1_457	UACUACAGAAGUAAUGCCUGUUUCUAUGGCUAAAACCUCCGUAGAUUGUAAUAUGUACAUCUGCGGAGAUUCUACUGAAUGUGCUAAUUUGCUUCUCCAAUAUGGUA	23595-23701	-26.3
458	>FJ882951.1_458	AUCUGCGGAGAUUCUACUGAAUGUGCUAAUUUGCUUCUCCAAUAUGGUAGCUUUUGCACACAACUAAAUCGUGCACUCUCAGGU	23653-23736	-20.6
459	>FJ882951.1_459	CUAAAUCGUGCACUCUCAGGUAUUGCUGCUGAACAGGAUCGCAACACACGUGAAGUGUUCGCUCAAG	23716-23782	-16.3
460	>FJ882951.1_460	AGGAUCGCAACACACGUGAAGUGUUCGCUCAAGUCAAACAAAUGUACAAAACCCCAACUUUGAAAUAUUUUGGUGGUUUUAAUUUUUCACAAAUGUUACCUGACCCU	23750-23856	-24.2
461	>FJ882951.1_461	GUUUUAAUUUUUCACAAAUGUUACCUGACCCUCUAAAGCCAACUAAGAGGUCUUUUAUUGAGGACUUGCUCUUUAAUAAGGUGACACUCGCUGAUGCUGGC	23825-23925	-25.2
462	>FJ882951.1_462	AAUGUUACCUGACCCUCUAAAGCCAACUAAGAGGUCUUUUAUUGAGGACUUGCUCUUUAAUAAGGUGACACUCGCUGAUGCUGGCUUCAUGAAGCAAUAUGGCGAAUGCCUAGGUGAUAUU	23841-23961	-36.2
463	>FJ882951.1_463	UAUUAAUGCUAGAGAUCUCAUUUGUGCGCAGAAGUUCAAUGGACUUACAGUGUUGCCACCUCUGCUCACUGAUGAUAUGAUUGCUGCCUACACGGCUGCUCUAGUUAGUGGUA	23958-24070	-34.9
464	>FJ882951.1_464	UGCCUACACGGCUGCUCUAGUUAGUGGUACUGCCACUGCUGGAUGGACAUUUGGUGCUGGCG	24042-24103	-17
465	>FJ882951.1_465	UGCCUACACGGCUGCUCUAGUUAGUGGUACUGCCACUGCUGGAUGGACA	24042-24090	-13.4
466	>FJ882951.1_466	GGACAUUUGGUGCUGGCGCUGCUCUUCAAAUACCUUUUGCUAUGCAAAUGGCAUAUAGGUUCAAUGGCAUUGGAGUUACCCAAAAUGUUC	24086-24175	-27.9
467	>FJ882951.1_467	GUUCUCUAUGAGAACCAAAAACAAAUCGCCAACCAAUUUAACAAGGCGAUUAGUCAAAUUCAAGAAU	24172-24238	-15.4
468	>FJ882951.1_468	CAUUGGGCAAGCUGCAAGACGUUGUUAACCAGAAUGCUCAAGCAUUAAACACACUUGUUAAACAACUUAGCUCUAAUUUUGGUGCAAUUUCAAGUGUGCUAAAUG	24260-24364	-32.9
469	>FJ882951.1_469	UUUGGUGCAAUUUCAAGUGUGCUAAAUGAUAUCCUUUCGCGACUUGAUAAAGUCGAGGCGGAGGUACAAAUUGACAGGUUAAUUACAGGCAGACUUCAAAGCCUUCAAA	24337-24445	-27
470	>FJ882951.1_470	AGUCGAGGCGGAGGUACAAAUUGACAGGUUAAUUACAGGCAGACUUCAAAGCCUUCAAACCUAUGUAACACAACAACUAAUCAGGGCUGCUGAAAUCAGGGCUUCUGCU	24387-24495	-25.2
471	>FJ882951.1_471	GGCAGACUUCAAAGCCUUCAAACCUAUGUAACACAACAACUAAUCAGGGCUGCUGAAAUCAGGGCUUCUGCU	24424-24495	-23
472	>FJ882951.1_472	UCAGGGCUUCUGCUAAUCUUGCUGCUACUAAAAUGUCUGAGUGUGUUCUUGGACAAUCAAAAAGAGUUGA	24482-24551	-11.6
473	>FJ882951.1_473	UGAGUGUGUUCUUGGACAAUCAAAAAGAGUUGACUUUUGUGGAAAGGGCUACCACCUUAUGUCCUUCCCACAAGCAGCCCCGCAUGGUGUUGUCUUCCUACAUGUCA	24519-24625	-34.1
474	>FJ882951.1_474	CACAAGCAGCCCCGCAUGGUGUUGUCUUCCUACAUGUCACGUAUGUG	24587-24633	-11
475	>FJ882951.1_475	GUGUUGUCUUCCUACAUGUCACGUAUGUGCCAUCCCAGGAGAGGAACUUCACCACAGCGCCAGCAAUUUGUCAUGAAGGCAAAGC	24605-24689	-24.4
476	>FJ882951.1_476	GUGCCAUCCCAGGAGAGGAACUUCACCACAGCGCCAGCAAUUUGUCAUGAAGGCAAAGCAUACUUCCCUCGUGAAGGUGUUUUUGUGUUUAAUGGCAC	24631-24728	-29.3
477	>FJ882951.1_477	CCAGGAGAGGAACUUCACCACAGCGCCAGCAAUUUGUCAUGAAGGCAAAGCAUACUUCCCUCGUGAAGGUGUUUUUGUGUUUAAUGGCACUUCUUGG	24639-24735	-27.4
478	>FJ882951.1_478	AGGCAAAGCAUACUUCCCUCGUGAAGGUGUUUUUGUGUUUAAUGGCACUUCUUGGUUUAUUACACAGAGGAACUUCUUUUCUCCACAAAUAAUUACUACAGACAAUACAUUUGUCU	24681-24796	-26.5
479	>FJ882951.1_479	GUGUUUAAUGGCACUUCUUGGUUUAUUACACAGAGGAACUUCUUUUCUCCACAAAUAAUUACUACAGACAAUACAUUUGUCUCAGGAAAUUGUGAUGUCGUUAUUGGCAU	24715-24824	-25.2
480	>FJ882951.1_480	GACAAUACAUUUGUCUCAGGAAAUUGUGAUGUCGUUAUUGGCAUCAUUAACAACACAGUUUAUGAUCCUCUGCAACCUGAGCUC	24781-24864	-20.1
481	>FJ882951.1_481	UCUGCAACCUGAGCUCGACUCAUUCAAAGAAGAGCUGGACAAGUACUUCAAAAAUCAUACAUCACCAGAUGUUGAUCUUGGCGACAUUUCAGG	24849-24941	-18.5
482	>FJ882951.1_482	CCUGAGCUCGACUCAUUCAAAGAAGAGCUGGACAAGUACUUCAAAAAUCAUACAUCACCAGAUGUUGAUCUUGGCGACAUUUCAGG	24856-24941	-23.7
483	>FJ882951.1_483	ACUUCAAAAAUCAUACAUCACCAGAUGUUGAUCUUGGCGACAUUUCAGGCAUUAACGCUUCUGUCGUCAACAUUCAAAAAGAAAUUGACCGCCUCAAUGAGGU	24893-24995	-29.4
484	>FJ882951.1_484	UUGGCGACAUUUCAGGCAUUAACGCUUCUGUCGUCAACAUUCAAAAAGAAAUUGACCGCCUCAAUGAGGUCGCUAA	24926-25001	-22.1
485	>FJ882951.1_485	AAUUGGGAAAAUAUGAGCAAUAUAUUAAAUGGCCUUGGUAUGUUUGGCUCGGCUUCAUUGCUGGACUAAUUGCCAUCGUCAUGGUUACAAUCUUGCUUUGUUGCAUGACUAGUU	25034-25147	-38.8
486	>FJ882951.1_486	CUUGCUUUGUUGCAUGACUAGUUGUUGCAGUUGCCUCAAGGGUGCAUGCUCUUGUGGUUCUUGCUGCAAGUUUGAUGAGGAUGACUCUGAGCCAG	25125-25219	-32.8
487	>FJ882951.1_487	GGUUCUUGCUGCAAGUUUGAUGAGGAUGACUCUGAGCCAGUUCUCAAGGGUGUCAAAUUACAUUACACAUAAACGAACU	25180-25258	-15.8
488	>FJ882951.1_488	ACUCUGAGCCAGUUCUCAAGGGUGUCAAAUUACAUUACACAUAAACGAACUUAUGGAUUUGUUUAUGAGAUUUUUUACUCUUGGAUCAAUUACUGCACAGCCAGU	25208-25312	-30.4
489	>FJ882951.1_489	GCCAGUAAAAAUUGACAAUGCUUCUCCUGCAAGUACUGUUCAUGCUACAGCAACGAUACCGCUACAAGCCUCACUCCCUUUCGGAUGGCUUGUUAUUGGC	25307-25406	-27.2
490	>FJ882951.1_490	CAAUGCUUCUCCUGCAAGUACUGUUCAUGCUACAGCAACGAUACCGCUACAAGCCUCACUCCCUUUCGGAUGGCUUGUUAUUGGCGUUG	25322-25410	-26.2
491	>FJ882951.1_491	GCAACGAUACCGCUACAAGCCUCACUCCCUUUCGGAUGGCUUGUUAUUGGCGUUGC	25356-25411	-23.5
492	>FJ882951.1_492	CUUGCUGUUUUUCAGAGCGCUACCAAAAUAAUUGCGCUCAAUAAAAGAUGGCAGCUAG	25416-25473	-18.8
493	>FJ882951.1_493	UAAAAGAUGGCAGCUAGCCCUUUAUAAGGGCUUCCAGUUCAUUUGCAAUUUACUGCUGCUAUUUGUUA	25457-25524	-16.9
494	>FJ882951.1_494	GCUUCCAGUUCAUUUGCAAUUUACUGCUGCUAUUUGUUACCAUCUAUUCACAUCUUUUGCUUGUCGCUGCAGGUAUGGAGGC	25486-25567	-24.7
495	>FJ882951.1_495	AUCUAUUCACAUCUUUUGCUUGUCGCUGCAGGUAUGGAGGCGCAAUUUUUGUACCUCUAUGCCUUGAUAUAUUUUCUACAAUGCAUCAACGCAUGUAGAAUUAU	25527-25630	-29.1
496	>FJ882951.1_496	UGCAGGUAUGGAGGCGCAAUUUUUGUACCUCUAUGCCUUGAUAUAUUUUCUACAAUGCAUCAACGCAUGUAGAAUUAUUAUGAGAUGUUGGCUUUGUUGGAAGUGCA	25553-25659	-31.9
497	>FJ882951.1_497	UUUGUACCUCUAUGCCUUGAUAUAUUUUCUACAAUGCAUCAACGCAUGUAGAAUUAUUAUGAGAUGUUGGCUUUGUUGGAAGUGCAAA	25574-25661	-26.4
498	>FJ882951.1_498	GAUGCCAACUACUUUGUUUGCUGGCACACACAUAACUAUGACUACUGUAUACCAUAUAACAGUGUCACAGAUACAAUUGUCGUUACUGAAGGUGACGGCAUU	25683-25784	-30.2
499	>FJ882951.1_499	UGACUACUGUAUACCAUAUAACAGUGUCACAGAUACAAUUGUCGUUACUGAAGGUGACGGCAUUUCA	25721-25787	-19.1
500	>FJ882951.1_500	GGUGACGGCAUUUCAACACCAAAACUCAAAGAAGACUACCAAAUUGGUGGUUAUUCUGAGGAUAGGCACUCAGGUGUUAAAGACUAUGUCGUUGUACAUGGCUAUUUCACC	25773-25883	-28.3
501	>FJ882951.1_501	ACUCAGGUGUUAAAGACUAUGUCGUUGUACAUGGCUAUUUCACCGAAGUUUACUACCAGCUUGAGU	25840-25905	-19.8
502	>FJ882951.1_502	GGCUAUUUCACCGAAGUUUACUACCAGCUUGAGUCUACACAAAUUACUACAGACACUGGUAUUGAAAAUGCU	25872-25943	-16.2
503	>FJ882951.1_503	UACAUUCUUCAUCUUUAACAAGCUUGUUAAAGACCCACCGAAUGUGCAAAUACACACAAUCGACGGCUCUUCAGGAGUUGCUAAUCCAGCAAUGGAUCCAAUUUA	25943-26047	-28.2
504	>FJ882951.1_504	UACAUUCUUCAUCUUUAACAAGCUUGUUAAAGACCCACCGAAUGUGCAAAUACACACAAUCGACGGCUCUUCAGGAGUUGCUAAUCCAGCAAUGGAUCCAAUUUAUGAUGUG	25943-26054	-20.7
505	>FJ882951.1_505	UCGACGGCUCUUCAGGAGUUGCUAAUCCAGCAAUGGAUCCAAUUUAUGAUGUGCCGACGA	26002-26061	-27.4
506	>FJ882951.1_506	GCUAAUCCAGCAAUGGAUCCAAUUUAUGAUGUGCCGACGACGACUACUAGCGUGCCUUUGUAAGCACAAGAAAGUGAGUACGAACUUAUGUACUCAUUCGU	26022-26122	-27.6
507	>FJ882951.1_507	GUGCCUUUGUAAGCACAAGAAAGUGAGUACGAACUUAUGUACUCAUUCGUUUCGGAAGAAACAGGUACGUUAAUAGUUAAUAGCGUACUUCUUUUUCUUGCUUUCGUGGUAU	26073-26184	-38
508	>FJ882951.1_508	AGUGAGUACGAACUUAUGUACUCAUUCGUUUCGGAAGAAACAGGUACGUUAAUAGUUAAUAGCGUACUUCUUUUUCUUGCUUUCGUGGUAUUCUUGCUAGUCACACU	26094-26200	-30.8
509	>FJ882951.1_509	GGUACGUUAAUAGUUAAUAGCGUACUUCUUUUUCUUGCUUUCGUGGUAUUCUUGCUAGUCACACUAGCCAUCCUUACUGCGCUUCGAUUGUGUGCGUACU	26136-26235	-29.3
510	>FJ882951.1_510	UGCUAGUCACACUAGCCAUCCUUACUGCGCUUCGAUUGUGUGCGUACUGCUGCAAUAUUGUUAACGUGAGUUUAGUAAAACCAACGGUUUACGUCUACUCGCG	26188-26290	-26.9
511	>FJ882951.1_511	AUAUUGUUAACGUGAGUUUAGUAAAACCAACGGUUUACGUCUACUCGCGUGUUAAAAAU	26242-26300	-15.9
512	>FJ882951.1_512	UGUUAAAAAUCUGAACUCUUCUGAAGGAGUUCCUGAUCUUCUGGUCUAAACA	26291-26342	-13.1
513	>FJ882951.1_513	GCUUAUCAUGGCAGACAACGGUACUAUUACCGUUGAGAAGCUUAAACAACUCCUGGAACAAUGGAACCUAGUAAUAGGU	26383-26461	-19.8
514	>FJ882951.1_514	GGCAGACAACGGUACUAUUACCGUUGAGAAGCUUAAACAACUCCUGGAACAAUGGAACCUAGUAAUAGGUUUCCUAUUCCUAGCCUGGAUUAUGUUACUACAAUUUGCC	26392-26500	-28.5
515	>FJ882951.1_515	CCGUUGAGAAGCUUAAACAACUCCUGGAACAAUGGAACCUAGUAAUAGGUUUCCUAUUCCUAGCCUGGAUUAUGUUACUACAAUUUGCCUAUUCUAAUCGG	26412-26512	-23.4
516	>FJ882951.1_516	AGCCUGGAUUAUGUUACUACAAUUUGCCUAUUCUAAUCGGAACAGGUUUUUGUACAUAAUAAAGCU	26473-26538	-19.2
517	>FJ882951.1_517	AGCCUGGAUUAUGUUACUACAAUUUGCCUAUUCUAAUCGGAACAGGUUUUUGUACAUAAUAAAGCUUGUUUUCCUCUGGCUCUUGUGGCCAGUAACACUUGCU	26473-26575	-28.5
518	>FJ882951.1_518	GUACAUAAUAAAGCUUGUUUUCCUCUGGCUCUUGUGGCCAGUAACACUUGCUUGUUUUGUGCUUGC	26524-26589	-18.2
519	>FJ882951.1_519	UUGGGUGACUGGCGGGAUUGCGAUUGCAAUGGCUUGUAUUGUAGGCUUGAUGUGGCUUAGCUACUUCGUUGCUUCCUUCAGGCUGUUUGCUCGUACCCGCUCAAUGUGGUCAUUCAA	26608-26724	-48.2
520	>FJ882951.1_520	CGUUGCUUCCUUCAGGCUGUUUGCUCGUACCCGCUCAAUGUGGUCAUUCAACCCAGAAACAAACAUUCUUCUCAAUG	26674-26750	-16.1
521	>FJ882951.1_521	UGGUCAUUCAACCCAGAAACAAACAUUCUUCUCAAUGUGCCUCUCCGGGGGACAAUUGUGACCA	26714-26777	-20.6
522	>FJ882951.1_522	GUGACCAGACCGCUCAUGGAAAGUGAACUUGUCAUUGGUGCUGUGAUCAUUCGUGGUCACUUGCGAAUGGCCGGACACCCCCUAGGGCGCUGUGACAU	26771-26868	-37.7
523	>FJ882951.1_523	CCUAGGGCGCUGUGACAUUAAGGACCUGCCAAAAGAGAUCACUGUGGCUACAUCACGAACGCUUUCUUAUUACAAAUUAGGAGCGUCGCAGCGUGUAGG	26851-26949	-38.1
524	>FJ882951.1_524	AGCGUCGCAGCGUGUAGGCACUGAUUCAGGUUUUGCUGCAUACAACCGCU	26932-26981	-13.8
525	>FJ882951.1_525	GUUUUGCUGCAUACAACCGCUACCGUAUUGGAAACUAUAAAUUAAAUACAGACCACGCCGGUAGCAACGAC	26961-27031	-15.2
526	>FJ882951.1_526	AUACAGACCACGCCGGUAGCAACGACAAUAUUGCUUUGCUAGUACAGUAAGUGACAACAGAUGUUUCAUCUUGUUGACUUCCAGGUUACAAU	27006-27097	-20.4
527	>FJ882951.1_527	UGUUUCAUCUUGUUGACUUCCAGGUUACAAUAGCAGAGAUAUUGAUUAUCAUUAUGAGGACUUUCAGGAUUGCUAUUUGGAAUCUUGACGUUAUAAUAAGUUCAAUAGUGAGACA	27067-27181	-21.5
528	>FJ882951.1_528	UAAGAAGAAUUAUUCGGAGUUAGAUGAUGAAGAACCUAUGGAGUUAGAUUAUCCAUAAAACGAACAUGAAAAUUAUUCUCUUCCUGACAUUGAUUGUAUUUACAUCUUG	27200-27308	-23.2
529	>FJ882951.1_529	UUCUCUUCCUGACAUUGAUUGUAUUUACAUCUUGCGAGCUAUAUCACUAUCAGGAGUGUGUUAGAG	27275-27340	-19.7
530	>FJ882951.1_530	CAGGAGUGUGUUAGAGGUACGACUGUACUACUAAAAGAACCUUGCCCAUCAGGAACAUACGAGGGCAAUUCACCAUUUCACCCUCUUG	27325-27412	-26.9
531	>FJ882951.1_531	UGCUGACAAUAAAUUUGCACUAACUUGCACUAGCACACACUUUGCUUUUGCUUGUGCUGACGGUACUCGACA	27411-27482	-18.6
532	>FJ882951.1_532	UUGCUUUUGCUUGUGCUGACGGUACUCGACAUACCUAUCAGCUGCGUGCAAGAUCAG	27452-27508	-23.5
533	>FJ882951.1_533	CAGCUGCGUGCAAGAUCAGUUUCACCAAAACUUUUCAUCAGACAAGAGGAGGUUCAACAAGAGCUCUACUCGCCACUUUUUCUCAUUGUUG	27490-27580	-13.4
534	>FJ882951.1_534	CUCAUUGUUGCUGCUCUAGUAUUUUUAAUACUUUGCUUCACCAUUAAGAGAAAGACAGAAUGAAUGAG	27571-27638	-12.9
535	>FJ882951.1_535	UAAUACUUUGCUUCACCAUUAAGAGAAAGACAGAAUGAAUGAGCUCACUUUAAUUGACUUCUAUUUGUGCUUUUUAGCCUUUCUGCUAUUCCUUGUUUUAAUAAUGCUUAUUA	27596-27708	-22
536	>FJ882951.1_536	GAAAGACAGAAUGAAUGAGCUCACUUUAAUUGACUUCUAUUUGUGCUUUUUAGCCUUUCUGCUAUUCCUUGUUUUAAUAAUGCUUAUUAUAUUUUGGUUUUC	27620-27721	-20.6
537	>FJ882951.1_537	UUCCUUGUUUUAAUAAUGCUUAUUAUAUUUUGGUUUUCACUCGAAAUCCAGGAUCUAGAAGAACCUUGUACCAAAGUCUAAACGAACAUGAA	27684-27775	-17
538	>FJ882951.1_538	GUUUUAAUAAUGCUUAUUAUAUUUUGGUUUUCACUCGAAAUCCAGGAUCUAGAAGAACCUUGUACCAAAGUCUAAACGAACAUGAAAC	27690-27777	-17.2
539	>FJ882951.1_539	GAAAUCCAGGAUCUAGAAGAACCUUGUACCAAAGUCUAAACGAACAUGAAACUUCUCAUUGUUUUGACUUGUAUUUC	27726-27802	-15.2
540	>FJ882951.1_540	GAUCUAGAAGAACCUUGUACCAAAGUCUAAACGAACAUGAAACUUCUCAUUGUUUUGACUUGUAUUUCUCUAUGCAGUU	27735-27813	-16.1
541	>FJ882951.1_541	UUGUACCAAAGUCUAAACGAACAUGAAACUUCUCAUUGUUUUGACUUGUAUUUCUCUAUGCAGUUGCAUAUGCACUGUAGUACAG	27749-27833	-17.1
542	>FJ882951.1_542	UGUUUUGACUUGUAUUUCUCUAUGCAGUUGCAUAUGCACUGUAGUACAGCGCUGUGCA	27785-27842	-16.7
543	>FJ882951.1_543	UGUUUUGACUUGUAUUUCUCUAUGCAGUUGCAUAUGCACUGUAGUACAGCGCUGUGCAUCUAAUAAACCUCAUGUGCUUGAAGAUCCUUGUAAGGUACAACA	27785-27886	-22.9
544	>FJ882951.1_544	AGUACAGCGCUGUGCAUCUAAUAAACCUCAUGUGCUUGAAGAUCCUUGUAAGGUACAACACUAGGGGUAAUACUUAUAGCACUGCUUGGCUUUGUGCU	27827-27924	-21.2
545	>FJ882951.1_545	AGGGGUAAUACUUAUAGCACUGCUUGGCUUUGUGCUCUAGGAAAGGUUUUACCUUU	27889-27944	-17.7
546	>FJ882951.1_546	CACUAUGGUUCAAACAUGCACACCUAAUGUUACUAUCAACUGUCAAGAUCCAGCUGGUGGUGCGCUUAUAGCUAGGUGUUGGUACCUUCAUGAAGGUCCCCAAACUG	27957-28063	-31.3
547	>FJ882951.1_547	UUGGUACCUUCAUGAAGGUCCCCAAACUGCUGCAUUUUAGAGACGUACUUGUUGUUUUAAAUAAACGAACAAAUUAAAAUGUCUGAUAAUGGACCCCAAUCAA	28035-28137	-20.6
548	>FJ882951.1_548	UUAAAAUGUCUGAUAAUGGACCCCAAUCAAACCAACGUAGUGCCCCCCGCAUUACAUUUGGUGGACCCACAGAUUCAACUGACAAUAA	28108-28195	-24.6
549	>FJ882951.1_549	UGCCCCCCGCAUUACAUUUGGUGGACCCACAGAUUCAACUGACAAUAACCAGAAUGGAGGACGCAAUGGGGCA	28148-28220	-24.3
550	>FJ882951.1_550	CUGACAAUAACCAGAAUGGAGGACGCAAUGGGGCAAGGCCAAAACAGCGCCGACCCCAAGGUUUACCCAAUAAUACUGCGUCUUGGUUCACAGCUCUCACUCAG	28186-28289	-29.3
551	>FJ882951.1_551	GUCUUGGUUCACAGCUCUCACUCAGCAUGGCAAGGAGGAACUUAGAU	28265-28311	-12.8
552	>FJ882951.1_552	GCAUGGCAAGGAGGAACUUAGAUUCCCUCGAGGCCAGGGC	28289-28328	-11.7
553	>FJ882951.1_553	GAACUUAGAUUCCCUCGAGGCCAGGGCGUUCCAAUCAACACCAAUAGUGGUCCAGAUGACCAAAUUGGCUACUACCGAAGAGCUACCCGACGAGUUC	28302-28398	-26.3
554	>FJ882951.1_554	CGAGGCCAGGGCGUUCCAAUCAACACCAAUAGUGGUCCAGAUGACCAAAUUGGCUACUACCGAAGAGCUACCCGACGAGUUCG	28317-28399	-22.4
555	>FJ882951.1_555	GGCUACUACCGAAGAGCUACCCGACGAGUUCGUGGUGGUGACGGCAAAAUGAAAGAGCUCAGCCCCAGAUGGUACUUCUAUUACCUAGGAACUGGCC	28368-28464	-25.5
556	>FJ882951.1_556	CUCAGCCCCAGAUGGUACUUCUAUUACCUAGGAACUGGCCCAGAAGCUUCACUUCCCUACGGCGCUAACAAAGAAGGCAUCGUAUGGGUUGCAACUGAG	28425-28523	-29.4
557	>FJ882951.1_557	GGCCCAGAAGCUUCACUUCCCUACGGCGCUAACAAAGAAGGCAUCGUAUGGGUUGCAACUGAGGGAGCC	28461-28529	-19.9
558	>FJ882951.1_558	GGCAUCGUAUGGGUUGCAACUGAGGGAGCCUUGAAUACACCCAAAGACCACAUUGGCACCCGCAAUCCUAAUAACAAUGCU	28500-28580	-23.8
559	>FJ882951.1_559	AUUGCCAAAAGGCUUCUACGCAGAGGGAAGCAGAGGCGGCAGUCAAGCCUCUUCUCGCUCCUCAUCACGUAGUCGCGGUAAU	28613-28694	-31.8
560	>FJ882951.1_560	UCAUCACGUAGUCGCGGUAAUUCAAGAAAUUCAACUCCUGGCAGCAGUAGGGGAAAUUCUCCUGCUCGAAUGGCUAGCGGAGGUGGUGA	28674-28762	-28.6
561	>FJ882951.1_561	UCUCCUGCUCGAAUGGCUAGCGGAGGUGGUGAAACUGCCCUCGCGCUAUUGCUGCUAGA	28731-28789	-13.8
562	>FJ882951.1_562	UGGCUAGCGGAGGUGGUGAAACUGCCCUCGCGCUAUUGCUGCUAGACAGAUUGAACCAGCUUGAGAGCAAAGUUUCUGGUAAAGGCCAACAACAACAAGGCCA	28744-28846	-24.2
563	>FJ882951.1_563	GCUUGAGAGCAAAGUUUCUGGUAAAGGCCAACAACAACAAGGCCAAACUGUCACUAAGAAAUCUGCUGCUGAGGC	28802-28876	-23.6
564	>FJ882951.1_564	CUAAAAAGCCUCGCCAAAAACGUACUGCCACAAAACAGUACAACGUCACUCAAGCAUUUGGGAGACGUGGUCCAG	28879-28953	-16.3
565	>FJ882951.1_565	UUGGGAGACGUGGUCCAGAACAAACCCAAGGAAAUUUCGGGGACCAAGACCUAA	28936-28989	-17.1
566	>FJ882951.1_566	UCCAGAACAAACCCAAGGAAAUUUCGGGGACCAAGACCUAAUCAGACAAGGAACUGAUUACAAACAUUGGCCGCAAAUUGCACAAUUUGCUCCAAGUGCCUCUGCAUUCUUUGGA	28949-29063	-23
567	>FJ882951.1_567	CUAAUCAGACAAGGAACUGAUUACAAACAUUGGCCGCAAAUUGCACAAUUUGCUCCAAGUGCCUCUGCAUUCUUUGGAAUGUCACGCAUUGG	28986-29077	-20.9
568	>FJ882951.1_568	GCUCCAAGUGCCUCUGCAUUCUUUGGAAUGUCACGCAUUGGCAUGGAAGU	29037-29086	-15.7
569	>FJ882951.1_569	GCUCCAAGUGCCUCUGCAUUCUUUGGAAUGUCACGCAUUGGCAUGGAAGUCACACCUUCGGGAACAUGGCUGACUUAUCAUGGAGC	29037-29122	-24.5
570	>FJ882951.1_570	UGUCACGCAUUGGCAUGGAAGUCACACCUUCGGGAACAUGGCUGACUUAUCAUGGAGCCAUUAAAUUGGAUGACA	29065-29139	-23.6
571	>FJ882951.1_571	GAAAAAGACUGAUGAAGCUCAGCCUUUGCCGCAGAGACAAAAGAAGCAGCCCACUGUGACUCUUCUUCCUGCGGCUGACAUGGAUGAUUUCUCCAGACAACUUC	29234-29337	-33.2
572	>FJ882951.1_572	CAUGGAUGAUUUCUCCAGACAACUUCAAAAUUCCAUGAGUGGAGCUUCUGCUGAUUCAACUCAGGCAUAAACACUCAUG	29312-29390	-17.7
573	>FJ882951.1_573	AAAAUUCCAUGAGUGGAGCUUCUGCUGAUUCAACUCAGGCAUAAACACUCAUGAUGACCACACAAGGCAGAUGGGCUAUGUAAACGUUUU	29338-29427	-21
574	>FJ882951.1_574	UCAUGAUGACCACACAAGGCAGAUGGGCUAUGUAAACGUUUUCGCAAUUCCGUUUACGAUACAUAGUCUACUCUUGUGCAGAAUGA	29386-29471	-32
575	>FJ882951.1_575	GUUUACGAUACAUAGUCUACUCUUGUGCAGAAUGAAUUCUCGUAACUAAACAGCACAAGUAGGUUUAGUUAACUUUAAU	29437-29515	-17.7
576	>FJ882951.1_576	GUAGGUUUAGUUAACUUUAAUCUCACAUAGCAAUCUUUAAUCAAUGUGUAACAUUAGGGAGGACUUGAAAGAGCCACCAC	29495-29574	-20.2
577	>FJ882951.1_577	UUUUCAUCGAGGCCACGCGGAGUACGAUCGAGGGUACAGUGAAUAAUGCUAGGGAGAGCUGCCUAUAUGGAAG	29576-29648	-18

## Sheet:  DUplex SVM screening
						MiRduplexSVM
S.N.	Sequence ID	Sequence	Location in genome	MFE		5strandMature	3strandMature	Multibranch	Selected Pre-MiRNA
1	>FJ882951.1_1	UUUAAAAUCUGUGUAGCUGUCGCUCGGCUGCAUGCCUAGUGCACCUACGCAGUAUAAA	65-122	-22.2	MiRNA_FJ882951.1_1	UUUAAAAUCUGUGUAGCUGUCGC	UAGUGCACCUACGCAGUAUAAA	No	Yes
2	>FJ882951.1_2	AGCUGUCGCUCGGCUGCAUGCCUAGUGCACCUACGCAGUAUAAACAAUAAUAAAUUUUACUGUCGUUGACAAGAAACGAGUAACUCGUCCCUCUUCUGCAGACUGCUUACGGUU	79-192	-28.3	MiRNA_FJ882951.1_2	Multibranch - No prediction		Yes	No
3	>FJ882951.1_3	UGCACCUACGCAGUAUAAACAAUAAUAAAUUUUACUGUCGUUGACAAGAAACGAGUAACUCGUCCCUCUUCUGCAGACUGCUUACGGUUUCGUCCGUGUUGCA	104-206	-25.1	MiRNA_FJ882951.1_3	Multibranch - No prediction		Yes	No
4	>FJ882951.1_4	ACUCGUCCCUCUUCUGCAGACUGCUUACGGUUUCGUCCGUGUUGCAGUCGAUCAUCAGCAUACCUAGGUUUCGUCCGGGU	161-240	-28.8	MiRNA_FJ882951.1_4	Multibranch - No prediction		Yes	No	hairpins	439
5	>FJ882951.1_5	AUACCUAGGUUUCGUCCGGGUGUGACCGAAAGGUAAGAUGGAGAGCCUUGUUCUUGGUGU	220-279	-18.6	MiRNA_FJ882951.1_5	Multibranch - No prediction		Yes	No	duplex svm prediction	247
7	>FJ882951.1_7	GCCUUGUUCUUGGUGUCAACGAGAAAACACACGUCCAACUCAGUUUGCCUGUCCUUCAGGUUAGAGACGUGCUAGUGCGUGGCUUCGGGGACUCUGUGGAAGAGGC	264-369	-34.2	MiRNA_FJ882951.1_7	UCAACGAGAAAACACACGUCCA	CUAGUGCGUGGCUUCGGGGACU	No	Yes
8	>FJ882951.1_8	GUCCUUCAGGUUAGAGACGUGCUAGUGCGUGGCUUCGGGGACUCUGUGGAAGAGGCCCUAUCGGAGGCACGUGAACACCUCAAAAAUGGC	314-403	-28.5	MiRNA_FJ882951.1_8	CGUGCUAGUGCGUGGCUUCGG	UAUCGGAGGCACGUGAACACC	No	Yes
9	>FJ882951.1_9	GAGGCACGUGAACACCUCAAAAAUGGCACUUGUGGUCUAGUAGAGCUGGAAAAAGGCGUACUGCCCCAGCUUGAACAGCCCUAUGUGUUCAUUAAACGUUCUGAUGCCUU	377-486	-37.1	MiRNA_FJ882951.1_9	AAUGGCACUUGUGGUCUAGUAGA	UUGAACAGCCCUAUGUGUUCAU	No	Yes
10	>FJ882951.1_10	UAUCGGAGGCACGUGAACACCUCAAAAAUGGCACUUGUGGUCUAGUAGAGCUGGAAAAAGGCGUACUGCCCCAGCUUGAACAGCCCUAUGUGUUCAUUAAACGUUCUGAUG	372-482	-37.7	MiRNA_FJ882951.1_10	AAUGGCACUUGUGGUCUAGUAGA	UUGAACAGCCCUAUGUGUUCAU	No	Yes
11	>FJ882951.1_11	CUUGUGGUCUAGUAGAGCUGGAAAAAGGCGUACUGCCCCAGCUUGAACAGCCCUAUGUGUUCAUUAAACGUUCUGAUGCCUUAAGCACCAAUCACGGCCACAAG	405-508	-34.2	MiRNA_FJ882951.1_11	AGAGCUGGAAAAAGGCGUACUG	UGAUGCCUUAAGCACCAAUCAC	No	Yes
12	>FJ882951.1_12	CCAGCUUGAACAGCCCUAUGUGUUCAUUAAACGUUCUGAUGCCUUAAGCACCAAUCACGGCCACAAGGUCGUUGAGCUGG	442-521	-29.6	MiRNA_FJ882951.1_12	AGCCCUAUGUGUUCAUUAAACGU	AAUCACGGCCACAAGGUCGU	No	Yes
13	>FJ882951.1_13	UUAAGCACCAAUCACGGCCACAAGGUCGUUGAGCUGGUUGCAGAAAUGGACGGCAUUCAGUACGGUCGUAGCGGUAUAA	485-563	-23.9	MiRNA_FJ882951.1_13	Multibranch - No prediction		Yes	No
14	>FJ882951.1_14	UACGGUCGUAGCGGUAUAACACUGGGAGUACUCGUGCCACAUGUGGGCGAAACCCCAAUUGCAUACCGCAAUGUUCUUCUUCGUA	545-629	-32.8	MiRNA_FJ882951.1_14	CGGUAUAACACUGGGAGUACUC	GAAACCCCAAUUGCAUACCGCA	No	Yes
15	>FJ882951.1_15	UCGUGCCACAUGUGGGCGAAACCCCAAUUGCAUACCGCAAUGUUCUUCUUCGUAAGAACGGUAAUAAGGGAGCCGGUGGUCAUAGCUAUGGCAUCGAUCUAAAGUCUUAUGA	576-687	-28.9	MiRNA_FJ882951.1_15	AACCCCAAUUGCAUACCGCAAUG	CGGUAAUAAGGGAGCCGGUGGU	No	Yes
16	>FJ882951.1_16	CAAUGUUCUUCUUCGUAAGAACGGUAAUAAGGGAGCCGGUGGUCAUAGCUAUGGCAUCGAUCUAAAGUCUUAUGACUUAGGUGACGAGCUUGGCACUG	613-710	-26.6	MiRNA_FJ882951.1_16	Multibranch - No prediction		Yes	No
17	>FJ882951.1_17	AGGGAGCCGGUGGUCAUAGCUAUGGCAUCGAUCUAAAGUCUUAUGACUUAGGUGACGAGCUUGGCACUGAUCCCAUUGAAGAUUAUGAACAAAACUGGAACACU	642-745	-30.6	MiRNA_FJ882951.1_17	AGCCGGUGGUCAUAGCUAUGGC	UGACGAGCUUGGCACUGAUCCC	No	Yes
18	>FJ882951.1_18	GGUGACGAGCUUGGCACUGAUCCCAUUGAAGAUUAUGAACAAAACUGGAACACUAAGCAUGGCAGUGGUGCACUCCGUGAACUCACUCGUGAGCUCAAUGGAGGUGCAGUCACU	692-805	-40.8	MiRNA_FJ882951.1_18	Multibranch - No prediction		Yes	No
19	>FJ882951.1_19	GCAUGGCAGUGGUGCACUCCGUGAACUCACUCGUGAGCUCAAUGGAGGUGCAGUCACUCGCUAUGU	748-813	-30.2	MiRNA_FJ882951.1_19	CAUGGCAGUGGUGCACUCCGUG	CAAUGGAGGUGCAGUCACUCGC	No	Yes
20	>FJ882951.1_20	CUCGUGAGCUCAAUGGAGGUGCAGUCACUCGCUAUGUCGACAACAAUUUCUGUGGCCCAGAUGGGUACCCUCUUGAUUGCAUCAAAG	777-863	-24.2	MiRNA_FJ882951.1_20	GGAGGUGCAGUCACUCGCUAUG	UGGCCCAGAUGGGUACCCUCU	No	Yes
21	>FJ882951.1_21	GGUGCAGUCACUCGCUAUGUCGACAACAAUUUCUGUGGCCCAGAUGGGUACCCUCUUGAUUGCAUCAAAGAUUUUCUCGCACGCGCGGGCAAGUCAAUGUGCACU	794-898	-30.7	MiRNA_FJ882951.1_21	Multibranch - No prediction		Yes	No
22	>FJ882951.1_22	CGCGCGGGCAAGUCAAUGUGCACUCUUUCCGAACAACUUGAUUACAUCGAGUCGAAGAGAGGUGUCUACUGCUGCCGUG	875-953	-26.4	MiRNA_FJ882951.1_22	AUGUGCACUCUUUCCGAACAAC	UCGAAGAGAGGUGUCUACUGCUG	No	Yes
23	>FJ882951.1_23	GAGUCGAAGAGAGGUGUCUACUGCUGCCGUGACCAUGAGCAUGAAAUUGCCUGGUUCACUGAGCGCUCUGAUAAGAGCUACGAGCACCAGACACCCUUCGAAAUU	923-1027	-32.2	MiRNA_FJ882951.1_23	Multibranch - No prediction		Yes	No
24	>FJ882951.1_24	UGAAAUUGCCUGGUUCACUGAGCGCUCUGAUAAGAGCUACGAGCACCAGACACCCUUCGAAAUUAAGAGUGCCAAGAAAUUUGACACUUUCA	964-1055	-26.1	MiRNA_FJ882951.1_24	Multibranch - No prediction		Yes	No
25	>FJ882951.1_25	UCGAAAUUAAGAGUGCCAAGAAAUUUGACACUUUCAAAGGGGAAUGCCCAAAGUUUGUGUUUCCUCUUAACUCAAAAGUCAAAGUCAUUCAACCACGUGUUGA	1020-1122	-23.7	MiRNA_FJ882951.1_25	Multibranch - No prediction		Yes	No
26	>FJ882951.1_26	ACACUUUCAAAGGGGAAUGCCCAAAGUUUGUGUUUCCUCUUAACUCAAAAGUCAAAGUCAUUCAACCACGUGUUGAAAAGAAAAAGACUGAGGGUUUCAUGGGGCGU	1047-1153	-25.3	MiRNA_FJ882951.1_26	Multibranch - No prediction		Yes	No
28	>FJ882951.1_28	UGAGGGUUUCAUGGGGCGUAUACGCUCUGUGUACCCUGUUGCAUCUCCACAGGAGUGUAACAAUAUGCACUUGUCUACCUUGAUGAAAUGUAAUCA	1135-1230	-27.5	MiRNA_FJ882951.1_28	Multibranch - No prediction		Yes	No
29	>FJ882951.1_29	AGUGUAACAAUAUGCACUUGUCUACCUUGAUGAAAUGUAAUCAUUGCGAUGAAGUUUCAUGGCAGACGUGCGACUUUCUGAAAGCCACUUGUGAACAUUGUGGCACU	1188-1294	-29.5	MiRNA_FJ882951.1_29	UUGAUGAAAUGUAAUCAUUGCG	CAGACGUGCGACUUUCUGAAAGC	No	Yes
30	>FJ882951.1_30	UGGCACUGAAAAUUUAGUUAUUGAAGGACCUACUACAUGUGGGUACCUACCUACUAAUGCUGUAGUGAAAAUGCCA	1288-1363	-22.1	MiRNA_FJ882951.1_30	UGAAAAUUUAGUUAUUGAAGGA	UACCUACCUACUAAUGCUGUAG	No	Yes
32	>FJ882951.1_32	AGCAUAGUGUUGCAGAUUAUCACAACCACUCAAACAUUGAAACUCGACUCCGCAAGGGAGGUAGGACUAGAUGUUUUGGAGGCUGUGUGUUUGCCUAUGUU	1398-1498	-36.6	MiRNA_FJ882951.1_32	ACUCAAACAUUGAAACUCGACU	UAGGACUAGAUGUUUUGGAGG	No	Yes
33	>FJ882951.1_33	GUGCCUACUGGGUUCCUCGUGCUAGUGCUGAUAUUGGCUCAGGACAUACUGGAAUUACUGGUGACAAUGUGGAGACCUUGAAUGAGGAUCUCCUUGAGAUAC	1515-1616	-32	MiRNA_FJ882951.1_33	Multibranch - No prediction		Yes	No
34	>FJ882951.1_34	CAAUGUGGAGACCUUGAAUGAGGAUCUCCUUGAGAUACUGAGUCGUGAACGUGUUAACAUUAACAUUGUUGGCGAUUUUCAUUUGAAUGAAGAGGUUGCCAUCAUUUUG	1579-1687	-32.1	MiRNA_FJ882951.1_34	Multibranch - No prediction		Yes	No
35	>FJ882951.1_35	GGAGACCUUGAAUGAGGAUCUCCUUGAGAUACUGAGUCGUGAACGUGUUAACAUUAACAUUGUUGGCGAUUUUCAUUUGAAUGAAGAGGUUGCCAUCAUUUUGGCAUCUUU	1585-1695	-34.2	MiRNA_FJ882951.1_35	Multibranch - No prediction		Yes	No
36	>FJ882951.1_36	GUCUUGAUUACAAGUCUUUCAAAACCAUUGUUGAGUCCUGCGGUAACUAUAAAGUUACCAAGGGAAAGCCCGUAAAAGGUGCUUGGAACAUUGGAC	1734-1829	-28.3	MiRNA_FJ882951.1_36	Multibranch - No prediction		Yes	No
37	>FJ882951.1_37	GGUAACUAUAAAGUUACCAAGGGAAAGCCCGUAAAAGGUGCUUGGAACAUUGGACAACAGAGAUCAGUUUUAACACCACUGUGUGGUUUUCCCUCACAGGCUGCUGGUGUUAUC	1775-1888	-38.9	MiRNA_FJ882951.1_37	Multibranch - No prediction		Yes	No
38	>FJ882951.1_38	GGCUGCUGGUGUUAUCAGAUCAAUUUUUGCGCGCACACUUGAUGCAGCAAACCACUCAAUUCCUGAUUUGCAAAGAGCAGCU	1873-1954	-27.5	MiRNA_FJ882951.1_38	UGUUAUCAGAUCAAUUUUUGCG	CAAACCACUCAAUUCCUGAUUUG	No	Yes
40	>FJ882951.1_40	GCUGUCACCAUACUUGAUGGUAUUUCUGAACAGUCAUUACGUCUUGUCGACGCCAUGGUUUAUACUUCAGACCUGCUCACCAACAGU	1952-2038	-21.9	MiRNA_FJ882951.1_40	UGGUAUUUCUGAACAGUCAUU	UGGUUUAUACUUCAGACCUGCU	No	Yes
41	>FJ882951.1_41	UGUCACCAUACUUGAUGGUAUUUCUGAACAGUCAUUACGUCUUGUCGACGCCAUGGUUUAUACUUCAGACCUGCUCACCAACAGUGUCAUUAUUAUGGCAUA	1954-2055	-25.3	MiRNA_FJ882951.1_41	Multibranch - No prediction		Yes	No
43	>FJ882951.1_43	CAACAGUGUCAUUAUUAUGGCAUAUGUAACUGGUGGUCUUGUACAACAGACUUCUCAGUGGUUGUCUAAUCUUUUGGGCACUACUGUUG	2032-2120	-27.9	MiRNA_FJ882951.1_43	Multibranch - No prediction		Yes	No
44	>FJ882951.1_44	GGUGGUCUUGUACAACAGACUUCUCAGUGGUUGUCUAAUCUUUUGGGCACUACUGUUGAAAAACUCAGGCCUAUCU	2063-2138	-21.8	MiRNA_FJ882951.1_44	AACAGACUUCUCAGUGGUUGU	ACUACUGUUGAAAAACUCAGGC	No	Yes
45	>FJ882951.1_45	UUCUCAGUGGUUGUCUAAUCUUUUGGGCACUACUGUUGAAAAACUCAGGCCUAUCUUUGAAUGGAUUGAGGCGAAACUUAGUGCAGGAGUUGAAUUUCUCAAGGAUGCUUGGGAG	2083-2197	-27.6	MiRNA_FJ882951.1_45	Multibranch - No prediction		Yes	No
46	>FJ882951.1_46	UGGGCACUACUGUUGAAAAACUCAGGCCUAUCUUUGAAUGGAUUGAGGCGAAACUUAGUGCAGGAGUUGAAUUUCUCAAGGAUGCUUGGGAGAUUCUCAAAUUUCUCA	2106-2213	-27.2	MiRNA_FJ882951.1_46	Multibranch - No prediction		Yes	No
47	>FJ882951.1_47	CUGUUGAAAAACUCAGGCCUAUCUUUGAAUGGAUUGAGGCGAAACUUAGUGCAGGAGUUGAAUUUCUCAAGGAUGCUUGGGAGAUUCUCAAAUUUCUCAUUACAG	2115-2219	-25	MiRNA_FJ882951.1_47	Multibranch - No prediction		Yes	No
49	>FJ882951.1_49	CAUUACAGGUGUUUUUGACAUCGUCAAGGGUCAAAUACAGGUUGCUUCAGAUAACAUCAAGGAUUGUGUAAAAUGCUUCAUUGAUGUUGUUAACAAGGCACUCGAAAUG	2212-2320	-29.6	MiRNA_FJ882951.1_49	Multibranch - No prediction		Yes	No
50	>FJ882951.1_50	GUCAAGGGUCAAAUACAGGUUGCUUCAGAUAACAUCAAGGAUUGUGUAAAAUGCUUCAUUGAUGUUGUUAACAAGGCACUCGAAAUGUGCAUUGAUCAAGUCAC	2234-2337	-30.7	MiRNA_FJ882951.1_50	UUGCUUCAGAUAACAUCAAGGA	AUUGAUGUUGUUAACAAGGCAC	No	Yes
51	>FJ882951.1_51	GUAAAAUGCUUCAUUGAUGUUGUUAACAAGGCACUCGAAAUGUGCAUUGAUCAAGUCACUAUCGCUGGCGCAAAGUUGCGAUCACUCAACUUAUGUGAAGUCUUCAU	2279-2385	-29.4	MiRNA_FJ882951.1_51	Multibranch - No prediction		Yes	No
52	>FJ882951.1_52	GUGCAUUGAUCAAGUCACUAUCGCUGGCGCAAAGUUGCGAUCACUCAACUUAUGUGAAGUCUUCAUCGCUCAAAGCAAGGGACUUUACCGUCAGUGUAU	2320-2418	-26.6	MiRNA_FJ882951.1_52	AUCGCUGGCGCAAAGUUGCGAUC	AGUCUUCAUCGCUCAAAGCAAG	No	Yes
53	>FJ882951.1_53	AUCGCUCAAAGCAAGGGACUUUACCGUCAGUGUAUACGUGGCAAGGAGCAGCUGCAACUACUCAUGCCUCUUAAGGCACCAAAAGAAGUAACCUUUCUUGAAGGUGAU	2384-2491	-37.9	MiRNA_FJ882951.1_53	AUCGCUCAAAGCAAGGGACUUU	AGUAACCUUUCUUGAAGGUGAU	No	Yes
54	>FJ882951.1_54	GCCUCUUAAGGCACCAAAAGAAGUAACCUUUCUUGAAGGUGAUUCACAUGACACAGUACUUACCUCUGAGGAGGU	2449-2523	-20.8	MiRNA_FJ882951.1_54	GCCUCUUAAGGCACCAAAAG	CAGUACUUACCUCUGAGGAGGU	No	Yes
55	>FJ882951.1_55	UCUCAAGAACGGUGAACUCGAAGCACUCGAGACGCCCGUUGAUAGCUUCACAAAUGGAGCUAUCGUUGGCACACCAGUCUGUGUAAAUGGCCUCAUGCUCUUAGAGA	2527-2633	-40.1	MiRNA_FJ882951.1_55	ACUCGAAGCACUCGAGACGCC	CACACCAGUCUGUGUAAAUGGC	No	Yes
58	>FJ882951.1_58	GGCUACAAACAAUGUCUUUCGCUUAAAAGGGGGUGCACCAAUUAAAGGUGUAACCUUUGGAGAAGAUACUGUUUGGGAAGUU	2677-2758	-29.3	MiRNA_FJ882951.1_58	AAUGUCUUUCGCUUAAAAGGGG	AACCUUUGGAGAAGAUACUGUU	No	Yes
59	>FJ882951.1_59	UGGAGAAGAUACUGUUUGGGAAGUUCAAGGUUACAAGAAUGUGAGAAUCACAUUUGAGCUUGAUGAACGUGUUGACAAAGUGCUUAAUGAAAAGUGCUCUGUCUA	2734-2838	-24.9	MiRNA_FJ882951.1_59	Multibranch - No prediction		Yes	No
60	>FJ882951.1_60	GUUGACAAAGUGCUUAAUGAAAAGUGCUCUGUCUACACUGUUGAAUCCGGUACCGAAGUUACUGAGUUUGCAUGUGUUGUAGCAGAGGCUGUUGUGAAGACUUUACAAC	2804-2912	-30.5	MiRNA_FJ882951.1_60	UCUGUCUACACUGUUGAAUCC	AGUUUGCAUGUGUUGUAGCAGA	No	Yes
62	>FJ882951.1_62	UGGAGUGUAGCUACAUUCUACUUAUUUGAUGAUGCUGGUGAAGAAAACUUUUCAUCACGUAUGUAUUGUUCCUUUUACCCUCCA	2957-3040	-29.7	MiRNA_FJ882951.1_62	UGGAGUGUAGCUACAUUCUACU	UAUUGUUCCUUUUACCCUCCA	No	Yes
63	>FJ882951.1_63	GGUGAAGAAAACUUUUCAUCACGUAUGUAUUGUUCCUUUUACCCUCCAGAUGAGGAAGAAGAGGACGAUGCAGAGUGUGAGGAAGAAGAAAUUGAUGAAACC	2993-3094	-36.3	MiRNA_FJ882951.1_63	UCACGUAUGUAUUGUUCCUUUU	AGAGGACGAUGCAGAGUGUGAG	No	Yes
64	>FJ882951.1_64	GAGGACGAUGCAGAGUGUGAGGAAGAAGAAAUUGAUGAAACCUGUGAACAUGAGUACGGUACAGAGGAUGAUUAUCAAGGUCUCCCUCUGGAAUUUGGUGCCUC	3053-3156	-28	MiRNA_FJ882951.1_64	AGGAAGAAGAAAUUGAUGAAACC	AUUAUCAAGGUCUCCCUCUGGA	No	Yes
65	>FJ882951.1_65	CGGUACAGAGGAUGAUUAUCAAGGUCUCCCUCUGGAAUUUGGUGCCUCAGCUGAAACAGUUCGAGUUGAGGAAGAAGAAGAGGAAGACUGGCUGGAUGAUACUACUG	3109-3215	-34.8	MiRNA_FJ882951.1_65	UCCCUCUGGAAUUUGGUGCCU	UUGAGGAAGAAGAAGAGGAAGA	No	Yes
66	>FJ882951.1_66	AGCAAUCAGAGAUUGAGCCAGAACCAGAACCUACACCUGAAGAACCAGUUAAUCAGUUUACUGGUUAUUUAAAACUUACUGACAAUGUU	3216-3304	-21.2	MiRNA_FJ882951.1_66	AGCCAGAACCAGAACCUACACC	AGUUAAUCAGUUUACUGGUUAU	No	Yes
67	>FJ882951.1_67	CCUACACCUGAAGAACCAGUUAAUCAGUUUACUGGUUAUUUAAAACUUACUGACAAUGUUGCCAUUAAAUGUGUUGACAUCGUUAAGGAGG	3245-3335	-22.5	MiRNA_FJ882951.1_67	Multibranch - No prediction		Yes	No
68	>FJ882951.1_68	GCACAAAGUGCUAAUCCUAUGGUGAUUGUAAAUGCUGCUAACAUACACCUGAAACAUGGUGGUGGUGUAGCAGGUGCACUCAACAAGGCAACCAAUGGUGC	3335-3435	-37	MiRNA_FJ882951.1_68	AUUGUAAAUGCUGCUAACAUACA	GUGGUGUAGCAGGUGCACUCA	No	Yes
69	>FJ882951.1_69	CAUGCAAAAGGAGAGUGAUGAUUACAUUAAGCUAAAUGGCCCUCUUACAGUAGGAGGGUCUUGUUUGCUUUCUGGACAUAAUCUUGCUAAGAAGUGUCUGCAUG	3436-3539	-33.4	MiRNA_FJ882951.1_69	UGAUUACAUUAAGCUAAAUGG	GUCUUGUUUGCUUUCUGGACAU	No	Yes
70	>FJ882951.1_70	CUGGACAUAAUCUUGCUAAGAAGUGUCUGCAUGUUGUUGGACCUAACCUAAAUGCAGGUGAGGACAUCCAGCUUCUUAAGGCAG	3507-3590	-22.4	MiRNA_FJ882951.1_70	Multibranch - No prediction		Yes	No
71	>FJ882951.1_71	CAUAAUCUUGCUAAGAAGUGUCUGCAUGUUGUUGGACCUAACCUAAAUGCAGGUGAGGACAUCCAGCUUCUUAAGGCAGCAUAUG	3512-3596	-23.4	MiRNA_FJ882951.1_71	UCUGCAUGUUGUUGGACCUAAC	UGAGGACAUCCAGCUUCUUAAGG	No	Yes
72	>FJ882951.1_72	GGACAUCUUACUUGCACCAUUGUUGUCAGCAGGCAUAUUUGGUGCUAAACCACUUCAGUCUUUACAAGUGUGCGUGCAGACGGUUC	3613-3698	-26.6	MiRNA_FJ882951.1_72	UGUUGUCAGCAGGCAUAUUUGGUG	UUACAAGUGUGCGUGCAGACG	No	Yes
73	>FJ882951.1_73	UUGUCAGCAGGCAUAUUUGGUGCUAAACCACUUCAGUCUUUACAAGUGUGCGUGCAGACGGUUCGUACACAGGUUUAUAUUGCAGUCAAUGGCAAAGCUCUUUAUGAGCAG	3635-3745	-35.2	MiRNA_FJ882951.1_73	Multibranch - No prediction		Yes	No
74	>FJ882951.1_74	GUACACAGGUUUAUAUUGCAGUCAAUGGCAAAGCUCUUUAUGAGCAGGUUGUCAUGGAUUAUCUUGAUAACCUGAAGC	3699-3776	-30	MiRNA_FJ882951.1_74	AUAUUGCAGUCAAUGGCAAAGCU	GUUGUCAUGGAUUAUCUUGAUA	No	Yes
75	>FJ882951.1_75	GCAAAGCUCUUUAUGAGCAGGUUGUCAUGGAUUAUCUUGAUAACCUGAAGCCUAGAGUGGAAGC	3726-3789	-22.8	MiRNA_FJ882951.1_75	AAGCUCUUUAUGAGCAGGUUGUC	UAACCUGAAGCCUAGAGUGGAAG	No	Yes
76	>FJ882951.1_76	UUGAUAACCUGAAGCCUAGAGUGGAAGCACCUAAACAAGAGGAGCCACCAAACACAGAAGAUUCCAAAACUGAGGAGAAAUCUGUCGUACAGAAGCCUGUCGA	3762-3864	-21.4	MiRNA_FJ882951.1_76	Multibranch - No prediction		Yes	No
77	>FJ882951.1_77	UAAGGCCUGCAUUGAUGAGGUUACCACAACACUGGAAGAAACUAAGUUUCUUACCAAUAAGUUACUCUUGUUUGCUGAUAUCAAUGGUAAGCUUUA	3880-3975	-26.2	MiRNA_FJ882951.1_77	UAAGGCCUGCAUUGAUGAGGUU	UGAUAUCAAUGGUAAGCUUUA	No	Yes
78	>FJ882951.1_78	GGAAGAAACUAAGUUUCUUACCAAUAAGUUACUCUUGUUUGCUGAUAUCAAUGGUAAGCUUUACCAUGAUUCUCAGAACAUGCUUAGAGGUGAAGAUAUGUCUUUC	3913-4018	-30	MiRNA_FJ882951.1_78	UUACCAAUAAGUUACUCUUGUU	GAACAUGCUUAGAGGUGAAG	No	Yes
79	>FJ882951.1_79	UUACCAUGAUUCUCAGAACAUGCUUAGAGGUGAAGAUAUGUCUUUCCUUGAGAAGGAUGCACCUUACAUGGUAGGUGAUGUUAUCACUAGUGGUGA	3973-4068	-29	MiRNA_FJ882951.1_79	UCUCAGAACAUGCUUAGAGGUG	UUACAUGGUAGGUGAUGUUAUC	No	Yes
80	>FJ882951.1_80	ACAUGCUUAGAGGUGAAGAUAUGUCUUUCCUUGAGAAGGAUGCACCUUACAUGGUAGGUGAUGUUAUCACUAGUGGUGAUAUCACUUGUGU	3990-4080	-26	MiRNA_FJ882951.1_80	Multibranch - No prediction		Yes	No
81	>FJ882951.1_81	CUUACAUGGUAGGUGAUGUUAUCACUAGUGGUGAUAUCACUUGUGUUGUAAUACCCUCCAAAAAGGCUGGUGGCACUACUGAGAUGCUCUCAAGAGCUUUGAAG	4035-4138	-34.8	MiRNA_FJ882951.1_81	Multibranch - No prediction		Yes	No
82	>FJ882951.1_82	UGGCACUACUGAGAUGCUCUCAAGAGCUUUGAAGAAAGUGCCA	4105-4147	-20.1	MiRNA_FJ882951.1_82	UGGCACUACUGAGAUGC	GAGCUUUGAAGAAAGUGCCA	No	Yes
83	>FJ882951.1_83	AAGAGCUUUGAAGAAAGUGCCAGUUGAUGAGUAUAUAACCACGUACCCUGGACAAGGAUGUGCUGGUUAUACACUUGAGGAAGCUAAGACUGCUCUU	4126-4222	-20.8	MiRNA_FJ882951.1_83	UUGAUGAGUAUAUAACCACGUA	GCUGGUUAUACACUUGAGGAAG	No	Yes
84	>FJ882951.1_84	AAAGUGCCAGUUGAUGAGUAUAUAACCACGUACCCUGGACAAGGAUGUGCUGGUUAUACACUUGAGGAAGCUAAGACUGCUCUUAAGAAAUGCAAAUCUGCAUUUU	4139-4244	-21.6	MiRNA_FJ882951.1_84	Multibranch - No prediction		Yes	No
88	>FJ882951.1_88	GACAAGAAAAUUAAUGCCUAUAUGCAUGGAUGUUAGAGCCAUAAUGGCAACCAUCCAACGUAAGUAUAAAGGAAUUAAAAUUCAAGAGGGCAUCGUUGACUAUGGUGUC	4336-4444	-29.3	MiRNA_FJ882951.1_88	Multibranch - No prediction		Yes	No
89	>FJ882951.1_89	AGCCAUAAUGGCAACCAUCCAACGUAAGUAUAAAGGAAUUAAAAUUCAAGAGGGCAUCGUUGACUAUGGUGUCCGAUUCUUCUUUUAUACUAGUAAAGAGCCUGUAGCU	4372-4480	-33.1	MiRNA_FJ882951.1_89	CAACGUAAGUAUAAAGGAAUU	UCCGAUUCUUCUUUUAUACUAGU	No	Yes
90	>FJ882951.1_90	UGACUAUGGUGUCCGAUUCUUCUUUUAUACUAGUAAAGAGCCUGUAGCUUCUAUUAUUACGAAGCUGAACUCUCUAAAUGAGCCGCUUGUCACAAUGCCAAUUGGUUA	4432-4539	-31.2	MiRNA_FJ882951.1_90	UACUAGUAAAGAGCCUGUAGC	CUGAACUCUCUAAAUGAGCCGC	No	Yes
91	>FJ882951.1_91	AGCCUGUAGCUUCUAUUAUUACGAAGCUGAACUCUCUAAAUGAGCCGCUUGUCACAAUGCCAAUUGGUUAUGUGACACAUGGUUUUAAUCUUGAAGAGGCUGCGCGCU	4470-4577	-32.1	MiRNA_FJ882951.1_91	UAAAUGAGCCGCUUGUCACA	UGACACAUGGUUUUAAUCUUGA	No	Yes
93	>FJ882951.1_93	AUGCCAAUUGGUUAUGUGACACAUGGUUUUAAUCUUGAAGAGGCUGCGCGCUGUAUGCGUUCUCUUAAAGCUCCUGCCGUAGUGUCAGUAU	4526-4616	-23.8	MiRNA_FJ882951.1_93	Multibranch - No prediction		Yes	No
94	>FJ882951.1_94	AGCUCCUGCCGUAGUGUCAGUAUCAUCACCAGAUGCUGUUACUACAUAUAAUGGAUACCU	4594-4653	-20.3	MiRNA_FJ882951.1_94	AGCUCCUGCCGUAGUGUCAGU	UGUUACUACAUAUAAUGGAUAC	No	Yes
95	>FJ882951.1_95	GUCAGUAUCAUCACCAGAUGCUGUUACUACAUAUAAUGGAUACCUCACUUCGUCAUCAAAGACAUCUGAGGAGCACUUUGUAGAAACAGUUUCUUUGGCUGGC	4609-4711	-36.4	MiRNA_FJ882951.1_95	UGCUGUUACUACAUAUAAUGG	UGAGGAGCACUUUGUAGAAAC	No	Yes
96	>FJ882951.1_96	AGUAUCAUCACCAGAUGCUGUUACUACAUAUAAUGGAUACCUCACUUCGUCAUCAAAGACAUCUGAGGAGCACUUUGUAGAAACAGUUUCUUUGGCUGGCUCU	4612-4714	-34.7	MiRNA_FJ882951.1_96	UGCUGUUACUACAUAUAAUGG	UGAGGAGCACUUUGUAGAAAC	No	Yes
97	>FJ882951.1_97	CUAUUCAGGACAGCGUACAGAGUUAGGUGUUGAAUUUCUUAAGCGUGGUGACAAAAUUGUGUACCACACUCUGGAGAGCCCCGUCGAGUUUCAUCUUGACGG	4729-4830	-28.7	MiRNA_FJ882951.1_97	Multibranch - No prediction		Yes	No
98	>FJ882951.1_98	GCGUGGUGACAAAAUUGUGUACCACACUCUGGAGAGCCCCGUCGAGUUUCAUCUUGACGGUGAGGUUCUUUCACUUGACAAACUAAAGAGUCUCUUAUCCCUGC	4771-4874	-27.4	MiRNA_FJ882951.1_98	Multibranch - No prediction		Yes	No
99	>FJ882951.1_99	AUCCCUGCGGGAGGUUAAGACUAUAAAAGUGUUCACAACUGUGGACAACACUAAUCUCCACACACAGCUUGUGGAUAUGUCUAUGACAUAUGGACAGCAGUUUGGU	4867-4972	-32.8	MiRNA_FJ882951.1_99	Multibranch - No prediction		Yes	No
100	>FJ882951.1_100	CGGGAGGUUAAGACUAUAAAAGUGUUCACAACUGUGGACAACACUAAUCUCCACACACAGCUUGUGGAUAUGUCUAUGACAUAUGGACAGCAGUUUGGUCCAACAUACUUG	4874-4984	-35.7	MiRNA_FJ882951.1_100	Multibranch - No prediction		Yes	No
102	>FJ882951.1_102	UAUGUCUAUGACAUAUGGACAGCAGUUUGGUCCAACAUACUUGGAUGGUGCUGAUGUUACAAAAAUUAAACCUCAUGUAAAUCAUG	4942-5027	-23.9	MiRNA_FJ882951.1_102	Multibranch - No prediction		Yes	No
103	>FJ882951.1_103	AAACCUCAUGUAAAUCAUGAGGGUAAGACUUUCUUUGUACUACCUAGUGAUGACACACUACGUAGUGAAGCUUUCGAGUACUACCAUACUCUUGAUGAGAGUUUU	5009-5113	-33.4	MiRNA_FJ882951.1_103	Multibranch - No prediction		Yes	No
104	>FJ882951.1_104	UGAAGCUUUCGAGUACUACCAUACUCUUGAUGAGAGUUUUCUUGGUAGGUACAUGUCUGCUUUAAACCACACAAAGAAAUGGAAAUUUCCUCAAGUUGGUGGUUUAACUUCA	5074-5185	-32.5	MiRNA_FJ882951.1_104	Multibranch - No prediction		Yes	No
105	>FJ882951.1_105	GUUGGUGGUUUAACUUCAAUUAAAUGGGCUGAUAACAAUUGUUAUUUGUCUAGUGUUUUAUUAGCACUUCAACAGCUUGAAGUCAAAUUCAAUGCACCAGC	5168-5268	-29.6	MiRNA_FJ882951.1_105	Multibranch - No prediction		Yes	No
106	>FJ882951.1_106	GUCUAGUGUUUUAUUAGCACUUCAACAGCUUGAAGUCAAAUUCAAUGCACCAGCACUUCAAGAGGCUUAUUAUAGAGCCCGUGCUGGUGAUGCUGCUAAC	5215-5314	-29.1	MiRNA_FJ882951.1_106	Multibranch - No prediction		Yes	No
108	>FJ882951.1_108	CGUGCUGGUGAUGCUGCUAACUUUUGUGCACUCAUACUCGCUUACAGUAAUAAAACUGUUGGCGAGCUUGGUGAUGUCAGAGAAACUAUGACCCAUCUUCUACAGCAUG	5294-5402	-40.5	MiRNA_FJ882951.1_108	UUGUGCACUCAUACUCGCUUAC	UGGCGAGCUUGGUGAUGUCAGA	No	Yes
111	>FJ882951.1_111	ACAUUGUGGUCAGAAAACUACUACCUUAACGGGUGUAGAAGCUGUGAUGUAUAUGGGUACUCUAUCUUAUGAUAAUCUUAAGACAGGUGUUUCCAUUCCAUGUGU	5446-5550	-24.3	MiRNA_FJ882951.1_111	Multibranch - No prediction		Yes	No
112	>FJ882951.1_112	ACUACUACCUUAACGGGUGUAGAAGCUGUGAUGUAUAUGGGUACUCUAUCUUAUGAUAAUCUUAAGACAGGUGUUUCCAUUCCAUGUGUGUGUGGUCGU	5462-5560	-24.4	MiRNA_FJ882951.1_112	Multibranch - No prediction		Yes	No
114	>FJ882951.1_114	UGCUACACAAUAUCUAGUACAACAAGAGUCUUCUUUUGUUAUGAUGUCUGCACCACCUGCUGAGUAUAAAUUACAGCAAGGUACAUUCUUAUGUGCGAAUGAGUACACUGGUA	5563-5675	-32.5	MiRNA_FJ882951.1_114	Multibranch - No prediction		Yes	No
115	>FJ882951.1_115	UGUUAUGAUGUCUGCACCACCUGCUGAGUAUAAAUUACAGCAAGGUACAUUCUUAUGUGCGAAUGAGUACACUGGUAACUAUCAGUGUGGUCAUUACA	5599-5696	-27.1	MiRNA_FJ882951.1_115	Multibranch - No prediction		Yes	No
116	>FJ882951.1_116	AGCAAGGUACAUUCUUAUGUGCGAAUGAGUACACUGGUAACUAUCAGUGUGGUCAUUACACUCAUAUAACUGCU	5637-5710	-25.2	MiRNA_FJ882951.1_116	UUAUGUGCGAAUGAGUACACU	UGUGGUCAUUACACUCAUAUA	No	Yes
117	>FJ882951.1_117	GGUACAUUCUUAUGUGCGAAUGAGUACACUGGUAACUAUCAGUGUGGUCAUUACACUCAUAUAACUGCU	5642-5710	-24.7	MiRNA_FJ882951.1_117	UUAUGUGCGAAUGAGUACACU	UGUGGUCAUUACACUCAUAUA	No	Yes
118	>FJ882951.1_118	UAUCAGUGUGGUCAUUACACUCAUAUAACUGCUAAGGAGACCCUCUAUCGUAUUGACGGAGCUCACCUUACAAAGAUGUCAGAGUACAAAGGACCAGUGACUGAUG	5678-5783	-41.8	MiRNA_FJ882951.1_118	AUAUAACUGCUAAGGAGACCCU	AGCUCACCUUACAAAGAUGUCA	No	Yes
119	>FJ882951.1_119	AGCUCACCUUACAAAGAUGUCAGAGUACAAAGGACCAGUGACUGAUGUUUUCUACAAGGAAACAUCUUACACUACAACCAUCAAGCCUGUGUCGUAUAAACUCGAUGGAGUU	5737-5848	-27.3	MiRNA_FJ882951.1_119	Multibranch - No prediction		Yes	No
121	>FJ882951.1_121	UGGAUGGGUAUUAUAAAAAGGAUAACGCUUACUAUACAGAGCAGCCUAUAGACCUUGUACCAACUCAACCA	5874-5944	-20	MiRNA_FJ882951.1_121	GAUGGGUAUUAUAAAAAGGAUA	UAGACCUUGUACCAACUCAACCA	No	Yes
124	>FJ882951.1_124	AGCUAUCUGUCACAUUCUUCCCAGACUUGAAUGGCGAUGUAGUGGCUAUUGACUAUAGACACUAUUCAGCGAGUUUCAAGAAAGGUGCUAAAUUACU	6048-6144	-30	MiRNA_FJ882951.1_124	ACAUUCUUCCCAGACUUGAAUG	AGCGAGUUUCAAGAAAGGUGC	No	Yes
125	>FJ882951.1_125	CCAGACUUGAAUGGCGAUGUAGUGGCUAUUGACUAUAGACACUAUUCAGCGAGUUUCAAGAAAGGUGCUAAAUUACUGCAUAAGCCAAUUGUUUGG	6068-6163	-29.3	MiRNA_FJ882951.1_125	UGGCUAUUGACUAUAGACACUAU	AAGGUGCUAAAUUACUGCAUAA	No	Yes
127	>FJ882951.1_127	AAUUGUUUGGCACAUUAACCAGGCUACAACCAAGACAACGUUCAAACCAAACACUUGGUGUUUACGUUGUCUUUGGAGUACAAAGCCAGUAGAUACUUCAAAUUCAUU	6154-6261	-38.6	MiRNA_FJ882951.1_127	CAGGCUACAACCAAGACAACGU	UGUCUUUGGAGUACAAAGCCAGU	No	Yes
128	>FJ882951.1_128	UGUUUACGUUGUCUUUGGAGUACAAAGCCAGUAGAUACUUCAAAUUCAUUUGAAGUUCUGGCAGUAGAAGACACACAAGGAAUGGACA	6212-6299	-26.9	MiRNA_FJ882951.1_128	UUGGAGUACAAAGCCAGUAGA	UUCUGGCAGUAGAAGACACACA	No	Yes
130	>FJ882951.1_130	ACAAUCUUGCUUGUGAAAGUCAACAACCCACCUCUGAAGAAGUAGUGGAAAAUCCUACCAUACAGAAGGAAGUCAUAGAGUGUGACGUGAAAACUACCGAAGUUGU	6297-6402	-22.9	MiRNA_FJ882951.1_130	Multibranch - No prediction		Yes	No
131	>FJ882951.1_131	UGUGAAAGUCAACAACCCACCUCUGAAGAAGUAGUGGAAAAUCCUACCAUACAGAAGGAAGUCAUAGAGUGUGACGUGAAAACUACCGAAGUUGUAGGCAAUGUCAUA	6308-6415	-25.1	MiRNA_FJ882951.1_131	Multibranch - No prediction		Yes	No
132	>FJ882951.1_132	UCUGAAGAAGUAGUGGAAAAUCCUACCAUACAGAAGGAAGUCAUAGAGUGUGACGUGAAAACUACCGAAGUUGUAGGCAAUGUCAUACUUAAACCAUCAGA	6329-6429	-22.7	MiRNA_FJ882951.1_132	Multibranch - No prediction		Yes	No
134	>FJ882951.1_134	AAGGUGUUAAAGUAACACAGGAGUUAGGUCAUGAGGAUCUUAUGGCUGCUUAUGUGGAAAACACAAGCAUUACCAUUAAGAAACCUAAUGAGCUUUCACUAGCCUU	6432-6537	-35.1	MiRNA_FJ882951.1_134	Multibranch - No prediction		Yes	No
136	>FJ882951.1_136	CAAUUGCCACUCAUGGUAUUGCUGCAAUUAAUAGUGUUCCUUGGAGUAAAAUUUUGGCUUAUGUCAAACCAUUCUUAGGACAAGCAGCAAUUACAACAUCAAAUUG	6549-6654	-30.6	MiRNA_FJ882951.1_136	UAGUGUUCCUUGGAGUAAAAUU	AACCAUUCUUAGGACAAGCAGC	No	Yes
137	>FJ882951.1_137	UGCCACUCAUGGUAUUGCUGCAAUUAAUAGUGUUCCUUGGAGUAAAAUUUUGGCUUAUGUCAAACCAUUCUUAGGACAAGCAGCAAUUACAACAUCAAAUUGCG	6553-6656	-28.2	MiRNA_FJ882951.1_137	UAGUGUUCCUUGGAGUAAAAUU	AACCAUUCUUAGGACAAGCAGC	No	Yes
138	>FJ882951.1_138	UGCUGCAAUUAAUAGUGUUCCUUGGAGUAAAAUUUUGGCUUAUGUCAAACCAUUCUUAGGACAAGCAGCAAUUACAACAUCAAAUUGCGCUAAGAGAUUAGCA	6568-6670	-30.3	MiRNA_FJ882951.1_138	Multibranch - No prediction		Yes	No
139	>FJ882951.1_139	UAGGACAAGCAGCAAUUACAACAUCAAAUUGCGCUAAGAGAUUAGCACAACGUGUGUUUAACAAUUAUAUGCCUUAUGUGUUUACAUUAUUGUUCCAAUUGUGUA	6624-6728	-22.5	MiRNA_FJ882951.1_139	Multibranch - No prediction		Yes	No
140	>FJ882951.1_140	UUUUACUAAAAGUACCAAUUCUAGAAUUAGAGCUUCACUACCUACAACUAUUGCUAAAAAUAGUGUUAAGAGUGUUGCUAAAUUAUGUUUGGAUGCCGGCAUUAAUUAUGUGAAG	6730-6844	-31.1	MiRNA_FJ882951.1_140	UAGAGCUUCACUACCUACAACU	UUAAGAGUGUUGCUAAAUUAUG	No	Yes
141	>FJ882951.1_141	GCUAAAAAUAGUGUUAAGAGUGUUGCUAAAUUAUGUUUGGAUGCCGGCAUUAAUUAUGUGAAGUCACCCAAAUUUUCUAAAUUGUUCACAAUCGCUAUGUGGC	6782-6884	-29.5	MiRNA_FJ882951.1_141	UGCUAAAUUAUGUUUGGAUGC	CACCCAAAUUUUCUAAAUUGUUCAC	No	Yes
142	>FJ882951.1_142	GGUGCUCCUUCUUAUUGUAAUGGCGUUAGAGAAUUGUAUCUUAAUUCGUCUAACGUUACUACUAUGGAUUUCUGUGAAGGUUCUUUUCC	6959-7047	-27.3	MiRNA_FJ882951.1_142	CUUAUUGUAAUGGCGUUAGAGA	UCUAACGUUACUACUAUGGAU	No	Yes
143	>FJ882951.1_143	UGAAACCAUUCAGGUGACGAUUUCAUCGUACAAGCUAGACUUGACAAUUUUAGGUCUGGCCGCUGAGUGGGUUUUGGCAUAUAUGUUGUUCA	7099-7190	-30	MiRNA_FJ882951.1_143	Multibranch - No prediction		Yes	No
144	>FJ882951.1_144	UGAAACCAUUCAGGUGACGAUUUCAUCGUACAAGCUAGACUUGACAAUUUUAGGUCUGGCCGCUGAGUGGGUUUUGGCAUAUAUGUUGUUCACAAAAUUCUUUUA	7099-7203	-22.8	MiRNA_FJ882951.1_144	Multibranch - No prediction		Yes	No
145	>FJ882951.1_145	GGUCUUUCAGCUAUAAUGCAGGUGUUCUUUGGCUAUUUUGCUAGUCAUUUCAUCAGCAAUUCUUGGCUCAUGUGGUUUAUCAUUAGUAUUGUACAAAUGGCACC	7211-7314	-29.7	MiRNA_FJ882951.1_145	Multibranch - No prediction		Yes	No
146	>FJ882951.1_146	AGCUAUAAUGCAGGUGUUCUUUGGCUAUUUUGCUAGUCAUUUCAUCAGCAAUUCUUGGCUCAUGUGGUUUAUCAUUAGUAUUGUACAAAUGGCACCCGUUUCUGCAAUGGUU	7219-7330	-32.4	MiRNA_FJ882951.1_146	Multibranch - No prediction		Yes	No
147	>FJ882951.1_147	AGCAAUUCUUGGCUCAUGUGGUUUAUCAUUAGUAUUGUACAAAUGGCACCCGUUUCUGCAAUGGUUAGGAUGUACAUCUUCUUUGCU	7265-7351	-24.3	MiRNA_FJ882951.1_147	UGGUUUAUCAUUAGUAUUGUACA	UGCAAUGGUUAGGAUGUACAUC	No	Yes
148	>FJ882951.1_148	UCUUGGCUCAUGUGGUUUAUCAUUAGUAUUGUACAAAUGGCACCCGUUUCUGCAAUGGUUAGGAUGUACAUCUUCUUUGCUUCUUUCUACUACAUAUGGAAGA	7271-7373	-29.4	MiRNA_FJ882951.1_148	Multibranch - No prediction		Yes	No
149	>FJ882951.1_149	GCUAUGUUCAUAUCAUGGAUGGUUGCACCUCUUCGACUUGCAUGAUGUGCUAUAAGCGCAAUCGUGCCACACGCGUUGAGUGUACAACUAUUGUUAAUGGC	7374-7474	-32.3	MiRNA_FJ882951.1_149	UGCACCUCUUCGACUUGCAUGA	CCACACGCGUUGAGUGUACAA	No	Yes
150	>FJ882951.1_150	UAUGUUCAUAUCAUGGAUGGUUGCACCUCUUCGACUUGCAUGAUGUGCUAUAAGCGCAAUCGUGCCACACGCGUUGAGUGUACAACUAUUGUUAAUGGCAUG	7376-7477	-33.8	MiRNA_FJ882951.1_150	UGCACCUCUUCGACUUGCAUGA	CCACACGCGUUGAGUGUACAA	No	Yes
151	>FJ882951.1_151	CCUCUUCGACUUGCAUGAUGUGCUAUAAGCGCAAUCGUGCCACACGCGUUGAGUGUACAACUAUUGUUAAUGGCAUGAAGAGAUCUUUCUAUGUCUAUGCAAAUGGAGG	7401-7509	-37.6	MiRNA_FJ882951.1_151	UAUAAGCGCAAUCGUGCCACACG	UAUUGUUAAUGGCAUGAAGAGA	No	Yes
152	>FJ882951.1_152	ACUAUUGUUAAUGGCAUGAAGAGAUCUUUCUAUGUCUAUGCAAAUGGAGGCCGUGGCUUCUGCAAGACUCACAAUUGGAAUUGUCUCAAUUGUGACACAUUUUGCACUGGU	7460-7570	-32.2	MiRNA_FJ882951.1_152	Multibranch - No prediction		Yes	No
154	>FJ882951.1_154	AGUACAUUCAUUAGUGAUGAAGUUGCUCGUGAUUUGUCACUCCAGUUUAAAAGACCAAUCAACCCUACUGACCAGUCAUCGUAUAUUGUUGAUAGUGUUGCU	7571-7672	-25.8	MiRNA_FJ882951.1_154	UGAUGAAGUUGCUCGUGAUUUGUC	CCAAUCAACCCUACUGACCAGUC	No	Yes
155	>FJ882951.1_155	UGAAGUUGCUCGUGAUUUGUCACUCCAGUUUAAAAGACCAAUCAACCCUACUGACCAGUCAUCGUAUAUUGUUGAUAGUGUUGCUGUGAAAAAUGGCGCGCUUCA	7588-7692	-27	MiRNA_FJ882951.1_155	UGAAGUUGCUCGUGAUUUGUCACU	UGAAAAAUGGCGCGCUUCA	No	Yes
156	>FJ882951.1_156	UGACCAGUCAUCGUAUAUUGUUGAUAGUGUUGCUGUGAAAAAUGGCGCGCUUCACCUCUACUUUGACAAGGCUGGUCA	7639-7716	-23.8	MiRNA_FJ882951.1_156	UCGUAUAUUGUUGAUAGUGUUG	CGCUUCACCUCUACUUUGACAA	No	Yes
157	>FJ882951.1_157	UGGCGCGCUUCACCUCUACUUUGACAAGGCUGGUCAAAAGACCUAUGAGAGACAUCCGCUCUCCCAUUUUGUCAAUUUAGACAAUUUGAGAGCUAACA	7681-7778	-23.9	MiRNA_FJ882951.1_157	CUCUACUUUGACAAGGCUGGUC	UCCCAUUUUGUCAAUUUAGAC	No	Yes
158	>FJ882951.1_158	GAGCUAACAACACUAAAGGUUCACUGCCUAUUAAUGUCAUAGUUUUUGAUGGCAAGUCCAAAUGCGACGAGUCUGCUUCUAAGUCUGCUU	7770-7859	-20.2	MiRNA_FJ882951.1_158	GGUUCACUGCCUAUUAAUGUCA	CAAGUCCAAAUGCGACGAGUCU	No	Yes
159	>FJ882951.1_159	AGCUAACAACACUAAAGGUUCACUGCCUAUUAAUGUCAUAGUUUUUGAUGGCAAGUCCAAAUGCGACGAGUCUGCUUCUAAGUCUGCUUCUGUGUACUACAGUCAGCU	7771-7878	-25.8	MiRNA_FJ882951.1_159	Multibranch - No prediction		Yes	No
160	>FJ882951.1_160	CGAGUCUGCUUCUAAGUCUGCUUCUGUGUACUACAGUCAGCUGAUGUGCCAACCUAUUCUGUUGCUUGACCAAGUUCUUGUAUCAGACGUUG	7837-7928	-21.9	MiRNA_FJ882951.1_160	Multibranch - No prediction		Yes	No
161	>FJ882951.1_161	AGUCUGCUUCUAAGUCUGCUUCUGUGUACUACAGUCAGCUGAUGUGCCAACCUAUUCUGUUGCUUGACCAAGUUCUUGUAUCAGACGUUGGAGAUAGUACU	7839-7939	-23.8	MiRNA_FJ882951.1_161	Multibranch - No prediction		Yes	No
162	>FJ882951.1_162	UUGAUGCUUAUGUCGACACCUUUUCAGCAACUUUUAGUGUUCCUAUGGAAAAACUUAAGGCACUUGUUGCUACAGCUCACAGCGAGUUAGCAAAGG	7959-8054	-25.3	MiRNA_FJ882951.1_162	CCUUUUCAGCAACUUUUAGUG	UAAGGCACUUGUUGCUACAGCU	No	Yes
163	>FJ882951.1_163	UAAGGCACUUGUUGCUACAGCUCACAGCGAGUUAGCAAAGGGUGUAGCUUUAGAUGGUGUCCUUUCUACAUUCGUGUCAGCUGCCCGACAAGGUGUUGUUGAUA	8014-8117	-35.4	MiRNA_FJ882951.1_163	UGCUACAGCUCACAGCGAGUUA	CAUUCGUGUCAGCUGCCCGACA	No	Yes
164	>FJ882951.1_164	AGGGUGUAGCUUUAGAUGGUGUCCUUUCUACAUUCGUGUCAGCUGCCCGACAAGGUGUUGUUGAUACCGAUGUUGACACAAAGGAUGUUAUUGAAUGUCUCAAACUUU	8052-8159	-35.4	MiRNA_FJ882951.1_164	UCCUUUCUACAUUCGUGUCAGC	UGAUACCGAUGUUGACACAAA	No	Yes
165	>FJ882951.1_165	GCAAAGGGUGUAGCUUUAGAUGGUGUCCUUUCUACAUUCGUGUCAGCUGCCCGACAAGGUGUUGUUGAUACCGAUGUUGACACAAAGGAUGUUAUUGAAUGU	8048-8149	-32.3	MiRNA_FJ882951.1_165	UCCUUUCUACAUUCGUGUCAGC	UGAUACCGAUGUUGACACAAA	No	Yes
166	>FJ882951.1_166	AGGUGUUGUUGAUACCGAUGUUGACACAAAGGAUGUUAUUGAAUGUCUCAAACUUUCACAUCACUCUGACUUAGAAGUGACAGGUGACAGUUGUAACAAUUUCAUGCUCACCU	8104-8216	-30.9	MiRNA_FJ882951.1_166	Multibranch - No prediction		Yes	No
168	>FJ882951.1_168	ACAUGACGCCCAGAGAUCUUGGCGCAUGUAUUGACUGUAAUGCAAGGCAUAUCAAUGCCCAAGUAGCAAAAAGUCACAAUGUUUCACUCAUCUGGAAUGU	8232-8331	-33.1	MiRNA_FJ882951.1_168	Multibranch - No prediction		Yes	No
169	>FJ882951.1_169	GUAGCAAAAAGUCACAAUGUUUCACUCAUCUGGAAUGUAAAAGACUACAUGUCUUUAUCUGAACAGCUGCGUAAACAAAUUCGUAGUGCUGC	8294-8385	-23	MiRNA_FJ882951.1_169	UUUCACUCAUCUGGAAUGUAAA	UAUCUGAACAGCUGCGUAAACA	No	Yes
171	>FJ882951.1_171	UGUGCUACAACUAGACAGGUUGUCAAUGUCAUAACUACUAAAAUCUCACUCAAGGGUGGUAAGAUUGUUAGUACUUGUUUUAAACUUAUGCUUAAGGCCACA	8417-8518	-26.9	MiRNA_FJ882951.1_171	Multibranch - No prediction		Yes	No
172	>FJ882951.1_172	GGUAAGAUUGUUAGUACUUGUUUUAAACUUAUGCUUAAGGCCACAUUAUUGUGCGUUCUUGCUGCAUUGGUUUGUUAUAUCGUUAUGCCAGUACAUACAUUGUCAAUC	8474-8581	-31.3	MiRNA_FJ882951.1_172	UGUUUUAAACUUAUGCUUAAGGC	UUCUUGCUGCAUUGGUUUGUUA	No	Yes
173	>FJ882951.1_173	AUAUCGUUAUGCCAGUACAUACAUUGUCAAUCCAUGAUGGUUACACAAAUGAAAUCAUUGGUUACAAAGCCAUUCAGGAUGGUGUCACUCGUGACAUCAU	8550-8649	-27.7	MiRNA_FJ882951.1_173	Multibranch - No prediction		Yes	No
174	>FJ882951.1_174	ACAUCAUUUCUACUGAUGAUUGUUUUGCAAAUAAACAUGCUGGUUUUGACGCAUGGUUUAGCCAGCGUGGCGGUUCAUACAAAAAUGACAAAAGCUGCCCUGU	8643-8745	-29.3	MiRNA_FJ882951.1_174	Multibranch - No prediction		Yes	No
175	>FJ882951.1_175	UGGUUUAGCCAGCGUGGCGGUUCAUACAAAAAUGACAAAAGCUGCCCUGUAGUAGCUGCUAUCAUUACAAGAGAGAUUGGUUUCAUAGUGCCUGGCUUACCG	8696-8797	-35.5	MiRNA_FJ882951.1_175	UGGCGGUUCAUACAAAAAUGAC	UAUCAUUACAAGAGAGAUUGGU	No	Yes
178	>FJ882951.1_178	GCGUUCUUGCUGCUGAGUGUACAAUUUUUAAGGAUGCUAUGGGCAAACCUGUGCCAUAUUGUUAUGACACUAAUUUGCUAGAGGGU	8925-9010	-26.3	MiRNA_FJ882951.1_178	UGAGUGUACAAUUUUUAAGG	UGUGCCAUAUUGUUAUGACACU	No	Yes
179	>FJ882951.1_179	CUAUUUCUUAUAGUGAGCUUCGUCCAGACACUCGUUAUGUGCUUAUGGAUGGUUCCAUCAUACAGUUUCCUAACACUUACCUGGAGGGUUCUGUUAGAGUAG	9012-9113	-29.6	MiRNA_FJ882951.1_179	UGAGCUUCGUCCAGACACUCG	UAACACUUACCUGGAGGGUUCU	No	Yes
180	>FJ882951.1_180	GCUUCGUCCAGACACUCGUUAUGUGCUUAUGGAUGGUUCCAUCAUACAGUUUCCUAACACUUACCUGGAGGGUUCUGUUAGAGUAGUAACAACUUUUGAUGCUGAGU	9028-9134	-27.1	MiRNA_FJ882951.1_180	Multibranch - No prediction		Yes	No
181	>FJ882951.1_181	ACUCGUUAUGUGCUUAUGGAUGGUUCCAUCAUACAGUUUCCUAACACUUACCUGGAGGGUUCUGUUAGAGUAGUAACAACUUUUGAUGCUGAGUACUGUAGACAUGGU	9041-9148	-27.8	MiRNA_FJ882951.1_181	UAACACUUACCUGGAGGGUUCU	ACUUUUGAUGCUGAGUACUGUAG	No	Yes
182	>FJ882951.1_182	GCUUAUGGAUGGUUCCAUCAUACAGUUUCCUAACACUUACCUGGAGGGUUCUGUUAGAGUAGUAACAACUUUUGAUGCUGAGUACUGUAGACAUGGUACAUGCGAAAGGU	9052-9161	-27.9	MiRNA_FJ882951.1_182	AUACAGUUUCCUAACACUUACC	UGAGUACUGUAGACAUGGUAC	No	Yes
183	>FJ882951.1_183	UUACCUGGAGGGUUCUGUUAGAGUAGUAACAACUUUUGAUGCUGAGUACUGUAGACAUGGUACAUGCGAAAGGUCAGAAGUAGGUAUUUGCCUAUCUACCAGUGGUAG	9088-9195	-27.7	MiRNA_FJ882951.1_183	UAGUAACAACUUUUGAUGCUGA	UCAGAAGUAGGUAUUUGCCUAU	No	Yes
184	>FJ882951.1_184	AACUUUUGAUGCUGAGUACUGUAGACAUGGUACAUGCGAAAGGUCAGAAGUAGGUAUUUGCCUAUCUACCAGUGGUAGAUGGGUUCUUAAUAAUGAGCAUUACAGAGCUCUAUCAGGAGUU	9118-9238	-33.9	MiRNA_FJ882951.1_184	GGUCAGAAGUAGGUAUUUGCC	UGGGUUCUUAAUAAUGAGCAU	No	Yes
186	>FJ882951.1_186	AUAAUGAGCAUUACAGAGCUCUAUCAGGAGUUUUCUGUGGUGUUGAUGCGAUGAAUCUCAUAGCUAACAUCUUUACUCCUCUUGUGCAACCUGUGGGUGCUUUAGAUGU	9207-9315	-28	MiRNA_FJ882951.1_186	AGGAGUUUUCUGUGGUGUUGAUGC	UAACAUCUUUACUCCUCUUG	No	Yes
187	>FJ882951.1_187	CAUAGCUAACAUCUUUACUCCUCUUGUGCAACCUGUGGGUGCUUUAGAUGUGUCUGCUUCAGUAGUGGCUGGUGGUAUUAUUGCCAUAUUGGUGACUUGUG	9265-9365	-27.4	MiRNA_FJ882951.1_187	Multibranch - No prediction		Yes	No
188	>FJ882951.1_188	GUAGUGGCUGGUGGUAUUAUUGCCAUAUUGGUGACUUGUGCUGCCUACUACUUUAUGAAAUUCAGACGUGUUUUUGGUGAGUACAACCAUGUUGUUGCUGC	9326-9426	-29	MiRNA_FJ882951.1_188	Multibranch - No prediction		Yes	No
189	>FJ882951.1_189	UGAAAUUCAGACGUGUUUUUGGUGAGUACAACCAUGUUGUUGCUGCUAAUGCACUUUUGUUUUUGAUGUCUUUCACUAUACUCUGUCUGGUACCA	9381-9475	-27.1	MiRNA_FJ882951.1_189	UGGUGAGUACAACCAUGUUGU	UGUUUUUGAUGUCUUUCACUAU	No	Yes
192	>FJ882951.1_192	UGGUACCAGCUUACAGCUUUCUGCCGGGAGUCUACUCAGUCUUUUACUUGUACUUGACAUUCUAUUUCACCAAUGAUGUUUCAUUCUUGGCUCACCUUCAAUGGUUUGCCA	9468-9578	-29.2	MiRNA_FJ882951.1_192	Multibranch - No prediction		Yes	No
194	>FJ882951.1_194	CAUGUUUUCUCCUAUUGUGCCUUUUUGGAUAACAGCAAUCUAUGUAUUCUGUAUUUCUCUGAAGCACUGCCAUUGGUUCUUUAACAACUAUCUUAGGAAAAGAGUCAUG	9577-9685	-26.4	MiRNA_FJ882951.1_194	UGUGCCUUUUUGGAUAACAGC	UGUAUUUCUCUGAAGCACUGC	No	Yes
195	>FJ882951.1_195	GUCAUGUUUAAUGGAGUUACAUUUAGUACCUUCGAGGAGGCUGCUUUGUGUACCUUUUUGCUCAACAAGGAAAUGUACCUAAAAUUGCGUAGC	9680-9772	-20.9	MiRNA_FJ882951.1_195	GGAGUUACAUUUAGUACCUUCG	UUGCUCAACAAGGAAAUGUAC	No	Yes
197	>FJ882951.1_197	GCUCAACAAGGAAAUGUACCUAAAAUUGCGUAGCGAGACACUGUUGCCACUUACACAGUAUAACAGGUAUCUUGCUCUAUAUAACAAGUACAAGUAUUUCAGUGGAGC	9739-9846	-37.6	MiRNA_FJ882951.1_197	UGCGUAGCGAGACACUGUUGCC	UAACAGGUAUCUUGCUCUAUAU	No	Yes
198	>FJ882951.1_198	UCAGUGGAGCCUUAGAUACUACCAGCUAUCGUGAAGCAGCUUGCUGCCACUUAGCAAAGGCUCUAAAUGA	9837-9906	-24.3	MiRNA_FJ882951.1_198	UCAGUGGAGCCUUAGAUACUA	UUAGCAAAGGCUCUAAAUGA	No	Yes
199	>FJ882951.1_199	UCAGUGGAGCCUUAGAUACUACCAGCUAUCGUGAAGCAGCUUGCUGCCACUUAGCAAAGGCUCUAAAUGACUUUAGCAACUCAGGUGCUGA	9837-9927	-28.9	MiRNA_FJ882951.1_199	Multibranch - No prediction		Yes	No
200	>FJ882951.1_200	GCCACUUAGCAAAGGCUCUAAAUGACUUUAGCAACUCAGGUGCUGAUGUUCUCUACCAACCACCACAGACAUCAAUCACUUCUGCUGUUCUGCAGAGUGGU	9882-9982	-31.4	MiRNA_FJ882951.1_200	UUAGCAACUCAGGUGCUGAUGUUC	AGACAUCAAUCACUUCUGCUGU	No	Yes
201	>FJ882951.1_201	CUCUACCAACCACCACAGACAUCAAUCACUUCUGCUGUUCUGCAGAGUGGUUUUAGGAAAAUGGCAUUCCCGUCAGGCAAAGUUGAAGGGUGCAUGGUACAAG	9932-10034	-27.2	MiRNA_FJ882951.1_201	Multibranch - No prediction		Yes	No
202	>FJ882951.1_202	GUUCUGCAGAGUGGUUUUAGGAAAAUGGCAUUCCCGUCAGGCAAAGUUGAAGGGUGCAUGGUACAAGUAACCUGUGGAAC	9968-10047	-18.7	MiRNA_FJ882951.1_202	GUUCUGCAGAGUGGUUUUAGG	UGGUACAAGUAACCUGUGGAAC	No	No
203	>FJ882951.1_203	GCAAAGUUGAAGGGUGCAUGGUACAAGUAACCUGUGGAACUACAACUCUUAAUGGAUUGUGGUUGGAUGACACAGUAUACUGUCCAAGACAUGUCAUUUGC	10008-10108	-29.5	MiRNA_FJ882951.1_203	CAAGUAACCUGUGGAACUACA	UGGUUGGAUGACACAGUAUACU	No	Yes
204	>FJ882951.1_204	CUGUGGAACUACAACUCUUAAUGGAUUGUGGUUGGAUGACACAGUAUACUGUCCAAGACAUGUCAUUUGCACAG	10039-10112	-20.8	MiRNA_FJ882951.1_204	UACAACUCUUAAUGGAUUGUGGU	UAUACUGUCCAAGACAUGUCAU	No	Yes
205	>FJ882951.1_205	UUGUGGUUGGAUGACACAGUAUACUGUCCAAGACAUGUCAUUUGCACAGCAGAAGACAUGCUUAAUCCUAACUAUGAAGAUCUGCUCAUUCGCAAAUCCAACCAUAG	10064-10170	-28.6	MiRNA_FJ882951.1_205	Multibranch - No prediction		Yes	No
210	>FJ882951.1_210	GUUAUUGGCCAUUCUAUGCAAAAUUGUCUGCUUAGGCUUAAAGUUGAUACUUCUAACCCUAAGACACCCAAGUAUAAAUUUGUCCGUAUCCAACCUGGUCAAACAU	10205-10310	-24.9	MiRNA_FJ882951.1_210	UGCAAAAUUGUCUGCUUAGGCU	UAACCCUAAGACACCCAAGUAU	No	Yes
212	>FJ882951.1_212	AUCUGGUGUUUAUCAGUGUGCCAUGAGACCUAAUUAUACCAUUAAAGGUUCUUUCCUUAAUGGAUCAUGUGGUAGUGUUGGUUUUAACAUUGAUUAUGAUUGCGUGU	10342-10448	-29.8	MiRNA_FJ882951.1_212	AGACCUAAUUAUACCAUUAAAG	AUCAUGUGGUAGUGUUGGUUUU	No	Yes
213	>FJ882951.1_213	UGCGUGUCUUUCUGCUAUAUGCAUCAUAUGGAGCUUCCAACAGGGGUACACGCUGGUACUGACUUAGAAGGUAAAUUCUAUGGUCCAUUUGUUGACAGACAAACUGCA	10442-10549	-30.8	MiRNA_FJ882951.1_213	Multibranch - No prediction		Yes	No
215	>FJ882951.1_215	AUUUGUUGACAGACAAACUGCACAGGCUGCAGGUACAGACACAACCAUAACAUUAAAUGUUUUGGCAUGGCUGUAUGCUGCUGUUAUCAAUGGUGAUAGGUGGUUUCUUAAUAGAU	10528-10643	-37.6	MiRNA_FJ882951.1_215	UGCAGGUACAGACACAACCAUA	UGGCAUGGCUGUAUGCUGCUGU	No	Yes
220	>FJ882951.1_220	UUAGAUAUGUGUGCUGCUUUGAAAGCGCUGCUGCAGAAUGGUAUGAAUGGUCGUACUAUCCUUGGUAGCACUAUUUUAGAAGAUGAGUUUACACCAUUUGA	10760-10860	-32.6	MiRNA_FJ882951.1_220	UGAAAGCGCUGCUGCAGAAUGG	UAUCCUUGGUAGCACUAUUUUA	No	Yes
221	>FJ882951.1_221	AGAAGAUGAGUUUACACCAUUUGAUGUUGUUAGACAAUGCUCUGGUGUUACCUUCCAAGGUAAGUUCAAGAAAAUUGUUAAGGGCACUCAUCAUUGGAUGCUUUUAACUUUCU	10837-10949	-38.6	MiRNA_FJ882951.1_221	UGAUGUUGUUAGACAAUGCUCUG	AGAAAAUUGUUAAGGGCACUCA	No	Yes
222	>FJ882951.1_222	GUGUUACCUUCCAAGGUAAGUUCAAGAAAAUUGUUAAGGGCACUCAUCAUUGGAUGCUUUUAACUUUCUUGACAUCACUAUUGAUUCUUGUUCAAAGUACAC	10881-10982	-32.6	MiRNA_FJ882951.1_222	Multibranch - No prediction		Yes	No
224	>FJ882951.1_224	UACGAGAAUGCUUUCUUGCCAUUUACUCUUGGUAUUAUGGCAAUUGCUGCAUGUGCUAUGCUGCUUGUUAAGCAUAAGCACGCAUUCUUGUG	11006-11097	-32.1	MiRNA_FJ882951.1_224	Multibranch - No prediction		Yes	No
225	>FJ882951.1_225	ACGCAUUCUUGUGCUUGUUUCUGUUACCUUCUCUUGCAACAGUUGCUUACUUUAAUAUGGUCUACAUGCCUGCUAGCUGGGUGAUGCGU	11085-11173	-25.2	MiRNA_FJ882951.1_225	UGCUUGUUUCUGUUACCUUCUC	UAUGGUCUACAUGCCUGCUAGC	No	Yes
226	>FJ882951.1_226	GGUCUACAUGCCUGCUAGCUGGGUGAUGCGUAUCAUGACAUGGCUUGAAUUGGCUGACACUAGCUUGUCUGGUUAUAGGCU	11143-11223	-27.3	MiRNA_FJ882951.1_226	UGCCUGCUAGCUGGGUGAUGCG	AAUUGGCUGACACUAGCUUGU	No	Yes
227	>FJ882951.1_227	GACAUGGCUUGAAUUGGCUGACACUAGCUUGUCUGGUUAUAGGCUUAAGGAUUGUGUUAUGUAUGCUUCAGCUUUAGUUUUGCUUAUUCUCAUGACAGCUCGCACUGUU	11179-11287	-24.7	MiRNA_FJ882951.1_227	Multibranch - No prediction		Yes	No
228	>FJ882951.1_228	GACACUAGCUUGUCUGGUUAUAGGCUUAAGGAUUGUGUUAUGUAUGCUUCAGCUUUAGUUUUGCUUAUUCUCAUGACAGCUCGCACUGUU	11198-11287	-25.3	MiRNA_FJ882951.1_228	CUGGUUAUAGGCUUAAGGAUUG	AGCUUUAGUUUUGCUUAUUCUC	No	Yes
231	>FJ882951.1_231	GCUCGCACUGUUUAUGAUGAUGCUGCUAGACGUGUUUGGACACUGAUGAAUGUCAUUACACUUGUUUACAAAGUCUACUAUGGUAAUGCUUUAGAUCAAGCUAUUUCCAUGUGGGC	11276-11391	-27.1	MiRNA_FJ882951.1_231	Multibranch - No prediction		Yes	No
232	>FJ882951.1_232	ACACUUGUUUACAAAGUCUACUAUGGUAAUGCUUUAGAUCAAGCUAUUUCCAUGUGGGCCUUAGUUAUUUCUGUAACCUCUAACUAUUCUGGUGU	11333-11427	-22	MiRNA_FJ882951.1_232	Multibranch - No prediction		Yes	No
233	>FJ882951.1_233	GUGGGCCUUAGUUAUUUCUGUAACCUCUAACUAUUCUGGUGUCGUUACGACUAUCAUGUUUUUAGCUAGAGCUAUAGUGUUUGUGUGUGUUGAGUAUUACCCAU	11386-11489	-26.1	MiRNA_FJ882951.1_233	UCUGUAACCUCUAACUAUUCUGG	UUUUUAGCUAGAGCUAUAGUGU	No	Yes
235	>FJ882951.1_235	GUUGAGUAUUACCCAUUGUUAUUUAUUACUGGCAACACCUUACAGUGUAUCAUGCUUGUUUAUUGUUUCUUAGGCUAUUGUUGCUGCUGCUACUUUGGCCUUUUCUGUUUACUCAAC	11474-11590	-30.6	MiRNA_FJ882951.1_235	Multibranch - No prediction		Yes	No
236	>FJ882951.1_236	UCAACCGUUACUUCAGGCUUACUCUUGGUGUUUAUGACUACUUGGUCUCUACACAAGAAUUUAGGUAUAUGAACUCCCAGGGGCUUUUGCCUCCUAAGAGUAGUAUUGA	11586-11694	-39.1	MiRNA_FJ882951.1_236	AGGCUUACUCUUGGUGUUUAUG	ACUCCCAGGGGCUUUUGCCUCC	No	Yes
237	>FJ882951.1_237	AAUUUAGGUAUAUGAACUCCCAGGGGCUUUUGCCUCCUAAGAGUAGUAUUGAUGCUUUCAAGCUUAACAUUAAGUUGUUGGGUAUUGGAGGUAAACCAUGUAUCAAGGUU	11643-11752	-25.5	MiRNA_FJ882951.1_237	Multibranch - No prediction		Yes	No
238	>FJ882951.1_238	GGGCUUUUGCCUCCUAAGAGUAGUAUUGAUGCUUUCAAGCUUAACAUUAAGUUGUUGGGUAUUGGAGGUAAACCAUGUAUCAAGGUUGCUACUGUACAGUCU	11666-11767	-24.3	MiRNA_FJ882951.1_238	Multibranch - No prediction		Yes	No
239	>FJ882951.1_239	UUAAGUUGUUGGGUAUUGGAGGUAAACCAUGUAUCAAGGUUGCUACUGUACAGUCUAAAAUGUCUGACGUAAAGUGCACAUCUGUGGUACUGCUCUCGGUUCUUCAACAACUUAG	11712-11826	-40.5	MiRNA_FJ882951.1_239	UAUCAAGGUUGCUACUGUACA	UAAAGUGCACAUCUGUGGUAC	No	Yes
240	>FJ882951.1_240	UGUCUGACGUAAAGUGCACAUCUGUGGUACUGCUCUCGGUUCUUCAACAACUUAGAGUAGAGUCAUCUUCUAAAUUGUGGGCACAAUGUGUACA	11772-11865	-27.5	MiRNA_FJ882951.1_240	UAAAGUGCACAUCUGUGGUACU	UAAAUUGUGGGCACAAUGUGU	No	Yes
241	>FJ882951.1_241	GGCACAAUGUGUACAACUCCACAAUGAUAUUCUUCUUGCAAAAGACACAACUGAAGCUUUCGAGAAGAUGGUUUCUCUUUUGUCUGUUUUGCUAUCCAUGCAGGGUGCU	11851-11959	-29.4	MiRNA_FJ882951.1_241	UGCAAAAGACACAACUGAAGCU	UUUCUCUUUUGUCUGUUUUGCU	No	Yes
242	>FJ882951.1_242	CUCCACAAUGAUAUUCUUCUUGCAAAAGACACAACUGAAGCUUUCGAGAAGAUGGUUUCUCUUUUGUCUGUUUUGCUAUCCAUGCAGGGUGCUGUAGACAUUAAUAG	11867-11973	-29.5	MiRNA_FJ882951.1_242	Multibranch - No prediction		Yes	No
244	>FJ882951.1_244	CUUCAGGCUAUUGCUUCAGAAUUUAGUUCUUUACCAUCAUAUGCCGCUUAUGCCACUGCCCAAGAGGCCUAUGAGCAGGCUGUAGCUAAUGGUGAUUCUGAAG	12008-12110	-32.8	MiRNA_FJ882951.1_244	UUACCAUCAUAUGCCGCUUAUG	UGAGCAGGCUGUAGCUAAUGGU	No	Yes
245	>FJ882951.1_245	GGCUAUUGCUUCAGAAUUUAGUUCUUUACCAUCAUAUGCCGCUUAUGCCACUGCCCAAGAGGCCUAUGAGCAGGCUGUAGCUAAUGGUGAUUCUGAAGUCGUUCUC	12013-12118	-36.5	MiRNA_FJ882951.1_245	UUACCAUCAUAUGCCGCUUAUG	UGAGCAGGCUGUAGCUAAUGGU	No	Yes
246	>FJ882951.1_246	GCUUCAGAAUUUAGUUCUUUACCAUCAUAUGCCGCUUAUGCCACUGCCCAAGAGGCCUAUGAGCAGGCUGUAGCUAAUGGUGAUUCUGAAGUCGUUCUCAAAAAGU	12020-12125	-31.9	MiRNA_FJ882951.1_246	UUACCAUCAUAUGCCGCUUAUG	UGAGCAGGCUGUAGCUAAUGGU	No	Yes
247	>FJ882951.1_247	UGAGCAGGCUGUAGCUAAUGGUGAUUCUGAAGUCGUUCUCAAAAAGUUAAAGAAAUCUUUGAAUGUGGCUAAAUCUGAGUUUGACCGUGAUGCUGCCAUGCAACG	12079-12183	-29.6	MiRNA_FJ882951.1_247	UGGUGAUUCUGAAGUCGUUCUCA	UGAAUGUGGCUAAAUCUGAGU	No	Yes
248	>FJ882951.1_248	UUUGAAUGUGGCUAAAUCUGAGUUUGACCGUGAUGCUGCCAUGCAACGCAAGUUGGAAAAGAUGGCAGAUCAGGCUAUGACCCAAAUGUACAAA	12136-12229	-28	MiRNA_FJ882951.1_248	UGGCUAAAUCUGAGUUUGACC	GCAGAUCAGGCUAUGACCCAAA	No	Yes
250	>FJ882951.1_250	AUCAGGCUAUGACCCAAAUGUACAAACAGGCAAGAUCUGAGGACAAGAGGGCAAAAGUAACUAGUGCUAUGCAAACAAUGCUCUUCACUAUGCUUAGGAAGCUUGAU	12204-12310	-24.6	MiRNA_FJ882951.1_250	Multibranch - No prediction		Yes	No
251	>FJ882951.1_251	GUGCUAUGCAAACAAUGCUCUUCACUAUGCUUAGGAAGCUUGAUAAUGAUGCACUUAACAACAUUAUCAACAAUGCGCGUGAUGGUUGUGUUCCACUCAACAU	12267-12369	-25.7	MiRNA_FJ882951.1_251	Multibranch - No prediction		Yes	No
252	>FJ882951.1_252	AUUAUCAACAAUGCGCGUGAUGGUUGUGUUCCACUCAACAUCAUACCAUUGACUACAGCAGCCAAACUCAUGGUUGUUGUCCCUGAUUAUGGUACCUACAAGAACACUUGUGAUGGU	12329-12445	-23.7	MiRNA_FJ882951.1_252	Multibranch - No prediction		Yes	No
253	>FJ882951.1_253	UUGUUGUCCCUGAUUAUGGUACCUACAAGAACACUUGUGAUGGUAACACCUUUACAUAUGCAUCUGCACUCUGGGAAAUCCAGCAA	12402-12487	-22.4	MiRNA_FJ882951.1_253	Multibranch - No prediction		Yes	No
254	>FJ882951.1_254	UUGUUGUCCCUGAUUAUGGUACCUACAAGAACACUUGUGAUGGUAACACCUUUACAUAUGCAUCUGCACUCUGGGAAAUCCAGCAAGUUGUUGAUGCGGAUAGCAA	12402-12507	-24.6	MiRNA_FJ882951.1_254	Multibranch - No prediction		Yes	No
256	>FJ882951.1_256	GCACUCUGGGAAAUCCAGCAAGUUGUUGAUGCGGAUAGCAAGAUUGUUCAACUUAGUGAAAUUAACAUGGACAAUUCACCAAAUUUGGCUUGGCCUCUUAUUGU	12467-12570	-23.1	MiRNA_FJ882951.1_256	Multibranch - No prediction		Yes	No
257	>FJ882951.1_257	ACUUAGUGAAAUUAACAUGGACAAUUCACCAAAUUUGGCUUGGCCUCUUAUUGUUACAGCUCUAAGAGCCAACUCAGCUGUUAAACUACAGAAUAAUGAACUGAGU	12517-12622	-23.8	MiRNA_FJ882951.1_257	Multibranch - No prediction		Yes	No
259	>FJ882951.1_259	ACUCAGCUGUUAAACUACAGAAUAAUGAACUGAGUCCAGUAGCACUACGACAGAUGUCCUGUGCGGCUGGUACCACACAAACAGCUUGU	12588-12676	-21.1	MiRNA_FJ882951.1_259	Multibranch - No prediction		Yes	No
260	>FJ882951.1_260	UAGCACUACGACAGAUGUCCUGUGCGGCUGGUACCACACAAACAGCUUGUACUGAUGACAAUGCACUUGCCUACUAUAACAAUUCGAAGGGAGGUAGGUUUGUGCUG	12627-12733	-28.2	MiRNA_FJ882951.1_260	Multibranch - No prediction		Yes	No
261	>FJ882951.1_261	UGUACUGAUGACAAUGCACUUGCCUACUAUAACAAUUCGAAGGGAGGUAGGUUUGUGCUGGCAUUACUAUCAGACCA	12674-12750	-23.9	MiRNA_FJ882951.1_261	CAAUGCACUUGCCUACUAUAAC	UAGGUUUGUGCUGGCAUUACU	No	Yes
262	>FJ882951.1_262	AGGGAGGUAGGUUUGUGCUGGCAUUACUAUCAGACCACCAAGAUCUCAAAUGGGCUAGAUUCCCUAAGAGUGAUGGUACAGGUACAAUUUACGCAGAACUGGAACCACCUU	12714-12824	-27.8	MiRNA_FJ882951.1_262	CUGGCAUUACUAUCAGACCACC	AAGAGUGAUGGUACAGGUACAA	No	Yes
263	>FJ882951.1_263	GAGGUAGGUUUGUGCUGGCAUUACUAUCAGACCACCAAGAUCUCAAAUGGGCUAGAUUCCCUAAGAGUGAUGGUACAGGUACAAUUUACGCAGAACUGGAACCACCUU	12717-12824	-31.8	MiRNA_FJ882951.1_263	CUGGCAUUACUAUCAGACCACC	AAGAGUGAUGGUACAGGUACAA	No	Yes
264	>FJ882951.1_264	GGCCUAAAGUGAAAUACUUGUACUUCAUCAAAGGCUUAAACAACCUAAAUAGAGGUAUGGUGCUGGGCAGUUUAGCUGCUACAGUACGUCUUCAGGCU	12852-12949	-28.1	MiRNA_FJ882951.1_264	Multibranch - No prediction		Yes	No
265	>FJ882951.1_265	GGCAGUUUAGCUGCUACAGUACGUCUUCAGGCUGGAAAUGCUACAGAAGUACCUGCCAAUUCAACUGUGCUUUCCUUCUGUGCUUUUGCAGUAGACCCUGCU	12917-13018	-36.5	MiRNA_FJ882951.1_265	Multibranch - No prediction		Yes	No
266	>FJ882951.1_266	ACAGAAGUACCUGCCAAUUCAACUGUGCUUUCCUUCUGUGCUUUUGCAGUAGACCCUGCUAAAGCAUAUAAGGAUUACCUAGCAAGUGGAGGACAACCAAUCACCAACUGU	12959-13069	-38.9	MiRNA_FJ882951.1_266	UGUGCUUUCCUUCUGUGCUUUU	UAAAGCAUAUAAGGAUUACCUAG	No	Yes
267	>FJ882951.1_267	CACACUGGUACAGGACAGGCAAUUACUGUAACACCAGAAGCUAACAUGGACCAAGAGUCCUUUGGUGGUGCUUCAUGUUGUCUGUAUUGUAGAUGCCACAUUG	13088-13190	-32.3	MiRNA_FJ882951.1_267	AGGCAAUUACUGUAACACCAG	UGGUGCUUCAUGUUGUCUGUAU	No	Yes
268	>FJ882951.1_268	GGUGCUUCAUGUUGUCUGUAUUGUAGAUGCCACAUUGACCAUCCAAAUCCUAAAGGAUUCUGUGACUUGAAAGGUAAGUACGUCCAAAUACCUACCACUUGUGCU	13154-13258	-25.8	MiRNA_FJ882951.1_268	UCUGUAUUGUAGAUGCCACAUUG	UAAGUACGUCCAAAUACCUACC	No	Yes
270	>FJ882951.1_270	CAGUCUGUACCGUCUGCGGAAUGUGGAAAGGUUAUGGCUGUAGUUGUGACCAACUCCGCGAACCCUUGAUGCAGUCUG	13290-13367	-27	MiRNA_FJ882951.1_270	UGCGGAAUGUGGAAAGGUUAUG	UGACCAACUCCGCGAACCCUUG	No	Yes
271	>FJ882951.1_271	GCUGUAGUUGUGACCAACUCCGCGAACCCUUGAUGCAGUCUGCGGAUGCAUCAACGUUUUUAAACGGGUUUGCGGUGUAAGUGCAGC	13326-13412	-32.9	MiRNA_FJ882951.1_271	AACUCCGCGAACCCUUGAUG	UCAACGUUUUUAAACGGGUUUGC	No	Yes
272	>FJ882951.1_272	UUAAACGGGUUUGCGGUGUAAGUGCAGCCCGUCUUACACCGUGCGGCACAGGCACUAGUACUGAUGUCGUCUACAGGGCUUUUGAUAUUUACAACGAAAAAGUUGCUGG	13385-13493	-30.3	MiRNA_FJ882951.1_272	Multibranch - No prediction		Yes	No
273	>FJ882951.1_273	GUCUUACACCGUGCGGCACAGGCACUAGUACUGAUGUCGUCUACAGGGCUUUUGAUAUUUACAACGAAAAAGUUGCUGGUUUUGCAAAGUUCCUAAAAAC	13415-13514	-24.4	MiRNA_FJ882951.1_273	Multibranch - No prediction		Yes	No
274	>FJ882951.1_274	AAAAAGUUGCUGGUUUUGCAAAGUUCCUAAAAACUAAUUGCUGUCGCUUCCAGGAGAAGGAUGAGGAAGGCAAUUUAUU	13481-13559	-18	MiRNA_FJ882951.1_274	Multibranch - No prediction		Yes	No
275	>FJ882951.1_275	GGAUGAGGAAGGCAAUUUAUUAGACUCUUACUUUGUAGUUAAGAGGCAUACUAUGUCUAACUACCAACAUGAAGAGACUAUUUAUAACUUGGUUAAAGAUUGUCC	13539-13643	-24.9	MiRNA_FJ882951.1_275	AAGGCAAUUUAUUAGACUCUUAC	AAGAGACUAUUUAUAACUUGGU	No	Yes
276	>FJ882951.1_276	AGCGGUUGCUGUCCAUGACUUUUUCAAGUUUAGAGUAGAUGGUGACAUGGUACCACAUAUAUCACGUCAGCGUCUAACUAAAUACACAAUGGCUGAUUUAGUCUAUGCU	13644-13752	-35.3	MiRNA_FJ882951.1_276	UCAAGUUUAGAGUAGAUGGUGA	ACGUCAGCGUCUAACUAAAUAC	No	Yes
278	>FJ882951.1_278	UAUAUCACGUCAGCGUCUAACUAAAUACACAAUGGCUGAUUUAGUCUAUGCUCUACGUCAUUUUGAUGAGGGUAAUUGUGAUACAUUAAAAGAAAUACUCGUCACAUA	13701-13808	-23.5	MiRNA_FJ882951.1_278	Multibranch - No prediction		Yes	No
279	>FJ882951.1_279	CUCUACGUCAUUUUGAUGAGGGUAAUUGUGAUACAUUAAAAGAAAUACUCGUCACAUACAAUUGCUGUGAUGAUGAUUAUUUCAAUAAGAAGGAUUGGUAUGACUUCGUAGAG	13751-13863	-25.5	MiRNA_FJ882951.1_279	UUGUGAUACAUUAAAAGAAAUA	UGAUGAUUAUUUCAAUAAGAAG	No	Yes
280	>FJ882951.1_280	GUAUGACUUCGUAGAGAAUCCUGACAUCUUACGCGUAUAUGCUAACUUAGGUGAGCGUGUACGCCAAUCAUUAUUAAAGACUGUACAAUUCUGCGAUGCUAUGC	13848-13951	-33.4	MiRNA_FJ882951.1_280	UAGAGAAUCCUGACAUCUUAC	UUAAAGACUGUACAAUUCUGCG	No	Yes
281	>FJ882951.1_281	GUACGCCAAUCAUUAUUAAAGACUGUACAAUUCUGCGAUGCUAUGCGUGAUGCAGGCAUUGUAGGCGUAC	13906-13975	-21.3	MiRNA_FJ882951.1_281	AGACUGUACAAUUCUGCGAUGC	UGCAGGCAUUGUAGGCGUAC	No	Yes
283	>FJ882951.1_283	GUACUGACAUUAGAUAAUCAGGAUCUUAAUGGGAACUGGUACGAUUUCGGUGAUUUCGUACAAGUAGCACCAGGCUGCGGAGUUCCUAUUGUGGAUUCAUAUUAC	13972-14076	-29.6	MiRNA_FJ882951.1_283	Multibranch - No prediction		Yes	No
284	>FJ882951.1_284	CAUUAGAUAAUCAGGAUCUUAAUGGGAACUGGUACGAUUUCGGUGAUUUCGUACAAGUAGCACCAGGCUGCGGAGUUCCUAUUGUGGAUUCAUAUUACUCAUUGCUGAUG	13979-14088	-32.3	MiRNA_FJ882951.1_284	Multibranch - No prediction		Yes	No
285	>FJ882951.1_285	GAGUUCCUAUUGUGGAUUCAUAUUACUCAUUGCUGAUGCCCAUCCUCACUUUGAUUAGGGCAUUGGCUGCUGAGUCCCAUAUGGAUGCUGAUCUCGCAAAACCACUU	14051-14157	-36.5	MiRNA_FJ882951.1_285	UGUGGAUUCAUAUUACUCAUUGC	CAUAUGGAUGCUGAUCUCGCA	No	Yes
287	>FJ882951.1_287	UACGGAAGAGAGACUUUGUCUCUUCGACCGUUAUUUUAAAUAUUGGGACCAGACAUACCAUCCCAAUUGUAUUAACUGUUUGGAUGAUAGGUGUAUCCUUCAUUG	14187-14291	-29.3	MiRNA_FJ882951.1_287	Multibranch - No prediction		Yes	No
288	>FJ882951.1_288	GACCGUUAUUUUAAAUAUUGGGACCAGACAUACCAUCCCAAUUGUAUUAACUGUUUGGAUGAUAGGUGUAUCCUUCAUUGUGCAAACUUUAAUGUGUU	14212-14309	-24.6	MiRNA_FJ882951.1_288	Multibranch - No prediction		Yes	No
289	>FJ882951.1_289	UUUCUACUGUGUUUCCACCUACAAGUUUUGGACCACUAGUAAGAAAAAUAUUUGUAGAUGGUGUUCCUUUUGUUGUUUCAACUGGAUACCAUUUUCGUGAGUUAGGAG	14312-14419	-26.8	MiRNA_FJ882951.1_289	Multibranch - No prediction		Yes	No
290	>FJ882951.1_290	AACUUUUAGUGUAUGCUGCUGAUCCAGCUAUGCAUGCAGCUUCUGGCAAUUUAUUGCUAGAUAAACGCACUACAUGCUUUUCAGUAGCUGCACUAACAAACAAUGUU	14471-14577	-40.7	MiRNA_FJ882951.1_290	AUCCAGCUAUGCAUGCAGCUUCU	AGAUAAACGCACUACAUGCUUUU	No	Yes
291	>FJ882951.1_291	GUUUCAAGGAACUUUUAGUGUAUGCUGCUGAUCCAGCUAUGCAUGCAGCUUCUGGCAAUUUAUUGCUAGAUAAACGCACUACAUGCUUUUCAGUAGCUGCACUAACAAAC	14462-14571	-39.3	MiRNA_FJ882951.1_291	AUCCAGCUAUGCAUGCAGCUUCU	AGAUAAACGCACUACAUGCUUUU	No	Yes
294	>FJ882951.1_294	AGGUUUCUUUAAGGAAGGAAGUUCUGUUGAACUAAAACACUUCUUCUUUGCUCAGGAUGGCAACGCUGCUAUCAGUGAUUAUGACUAUUAUCGUUAUAAUCU	14640-14741	-22.2	MiRNA_FJ882951.1_294	Multibranch - No prediction		Yes	No
295	>FJ882951.1_295	AUGACUAUUAUCGUUAUAAUCUGCCAACAAUGUGUGAUAUCAGACAACUCCUAUUCGUAGUUGAAGUUGUUGAUAAAUACUUUGAUUGUUACGAUGGUGGCUGU	14720-14823	-23.6	MiRNA_FJ882951.1_295	UGCCAACAAUGUGUGAUAUCAGA	UUGUUGAUAAAUACUUUGAUUG	No	Yes
296	>FJ882951.1_296	UAGUUGAAGUUGUUGAUAAAUACUUUGAUUGUUACGAUGGUGGCUGUAUUAAUGCCAACCAAGUAAUCGUUAACAAUCUGGAUAAAUCAGCUG	14777-14869	-22.9	MiRNA_FJ882951.1_296	AAUACUUUGAUUGUUACGAUGG	AAGUAAUCGUUAACAAUCUGG	No	Yes
297	>FJ882951.1_297	AGUUGAAGUUGUUGAUAAAUACUUUGAUUGUUACGAUGGUGGCUGUAUUAAUGCCAACCAAGUAAUCGUUAACAAUCUGGAUAAAUCAGCUGGUUUCCCAUU	14778-14879	-24.7	MiRNA_FJ882951.1_297	AAUACUUUGAUUGUUACGAUGG	AAGUAAUCGUUAACAAUCUGG	No	Yes
298	>FJ882951.1_298	UGCCAACCAAGUAAUCGUUAACAAUCUGGAUAAAUCAGCUGGUUUCCCAUUUAAUAAAUGGGGUAAGGCUAGACUUUAUUAUGACUCAAUGAGUUAUGAGGAUCA	14829-14933	-28.3	MiRNA_FJ882951.1_298	CUGGAUAAAUCAGCUGGUUUCC	UAAGGCUAGACUUUAUUAUGAC	No	Yes
299	>FJ882951.1_299	GGCUAGACUUUAUUAUGACUCAAUGAGUUAUGAGGAUCAAGAUGCACUUUUCGCGUAUACUAAGCGUAAUGUCAUCCCUACUAUAACUCAAAUGAAUCUUAAGUAUGCC	14895-15003	-31.3	MiRNA_FJ882951.1_299	UGAGGAUCAAGAUGCACUUUUCG	UAAUGUCAUCCCUACUAUAACU	No	Yes
300	>FJ882951.1_300	UACUAAGCGUAAUGUCAUCCCUACUAUAACUCAAAUGAAUCUUAAGUAUGCCAUUAGUGCAAAGAAUAGAGCUCGCACCGUAGCUGGUGUCUCUAUCUGUAGUA	14952-15055	-26.9	MiRNA_FJ882951.1_300	Multibranch - No prediction		Yes	No
301	>FJ882951.1_301	UUAGUGCAAAGAAUAGAGCUCGCACCGUAGCUGGUGUCUCUAUCUGUAGUACUAUGACAAAUAGACAGUUUCAUCAGAAAUUAUUGAAGUCAAUAGCCGCCACUAG	15005-15110	-24	MiRNA_FJ882951.1_301	Multibranch - No prediction		Yes	No
302	>FJ882951.1_302	UAGACAGUUUCAUCAGAAAUUAUUGAAGUCAAUAGCCGCCACUAGAGGAGCUACUGUGGUAAUUGGAACAAGCAAGUUUUACGGUGGCUGGCAUAAUAUGUUAAAAACUGUUUA	15066-15179	-33.5	MiRNA_FJ882951.1_302	Multibranch - No prediction		Yes	No
303	>FJ882951.1_303	ACACCUUAUGGGUUGGGAUUAUCCAAAAUGUGACAGAGCCAUGCCUAACAUGCUUAGGAUAAUGGCCUCUCUUGUUCUUGCUCGCAAACAUAACACUUGCUGU	15198-15300	-26.4	MiRNA_FJ882951.1_303	GUUGGGAUUAUCCAAAAUGUGA	UCUCUUGUUCUUGCUCGCAAAC	No	Yes
304	>FJ882951.1_304	UGUUCUUGCUCGCAAACAUAACACUUGCUGUAACUUAUCACACCGUUUCUACAGGUUAGCUAACGAGUGUGCGCAAGUAUUAAGUGAGAUGGUCA	15270-15364	-28	MiRNA_FJ882951.1_304	UGCUGUAACUUAUCACACCGUU	ACGAGUGUGCGCAAGUAUUAAG	No	Yes
305	>FJ882951.1_305	UGCUCGCAAACAUAACACUUGCUGUAACUUAUCACACCGUUUCUACAGGUUAGCUAACGAGUGUGCGCAAGUAUUAAGUGAGAUGGUCAUGUGUGGCGGCUCA	15276-15378	-32	MiRNA_FJ882951.1_305	UGCUGUAACUUAUCACACCGUU	ACGAGUGUGCGCAAGUAUUAAG	No	Yes
306	>FJ882951.1_306	GCGCAAGUAUUAAGUGAGAUGGUCAUGUGUGGCGGCUCACUAUAUGUUAAACCAGGUGGAACAUCAUCCGGUGAUGCUACAACUGCUUAUGCUAAUAGUGU	15340-15440	-27.4	MiRNA_FJ882951.1_306	UGUGGCGGCUCACUAUAUGUUA	UCAUCCGGUGAUGCUACAAC	No	Yes
307	>FJ882951.1_307	GCAAGUAUUAAGUGAGAUGGUCAUGUGUGGCGGCUCACUAUAUGUUAAACCAGGUGGAACAUCAUCCGGUGAUGCUACAACUGCUUAUGCUAAUAGUGU	15342-15440	-28.8	MiRNA_FJ882951.1_307	UGUGGCGGCUCACUAUAUGUUA	UCAUCCGGUGAUGCUACAAC	No	Yes
308	>FJ882951.1_308	UGGUCAUGUGUGGCGGCUCACUAUAUGUUAAACCAGGUGGAACAUCAUCCGGUGAUGCUACAACUGCUUAUGCUAAUAGUGUCUUUAACAUUUGUCAAGCUGUUACAGCCA	15359-15469	-30.1	MiRNA_FJ882951.1_308	Multibranch - No prediction		Yes	No
310	>FJ882951.1_310	GUCUUUAACAUUUGUCAAGCUGUUACAGCCAAUGUAAAUGCACUUCUUUCAACUGAUGGUAAUAAGAUAGCUGACAAGUAUGUCCGCAAUCUACAACACAGGC	15439-15541	-24.6	MiRNA_FJ882951.1_310	Multibranch - No prediction		Yes	No
311	>FJ882951.1_311	GCACUUCUUUCAACUGAUGGUAAUAAGAUAGCUGACAAGUAUGUCCGCAAUCUACAACACAGGCUCUAUGAGUGU	15478-15552	-22.3	MiRNA_FJ882951.1_311	CAACUGAUGGUAAUAAGAUAGC	GCAAUCUACAACACAGGCUCU	No	Yes
313	>FJ882951.1_313	UAUAGAAAUAGGGAUGUUGAUCAUGAAUUCGUGGAUGAGUUUUACGCUUACCUGCGUAAACAUUUCUCCAUGAUGAUUCUUUCUGAUGAUGCCGUUGUGUGCUAUA	15556-15661	-34	MiRNA_FJ882951.1_313	UCAUGAAUUCGUGGAUGAGUUU	UCUCCAUGAUGAUUCUUUCUGA	No	Yes
314	>FJ882951.1_314	AUUCUUUCUGAUGAUGCCGUUGUGUGCUAUAACAGUAACUAUGCGGCUCAAGGUUUAGUAGCUAGCAUUAAGAACUUUAAGGCAGUUCUUUAUUAUCAAAACAAU	15631-15735	-24.8	MiRNA_FJ882951.1_314	CCGUUGUGUGCUAUAACAGUAACU	UAGUAGCUAGCAUUAAGAACU	No	Yes
317	>FJ882951.1_317	UGAGGCAAAAUGUUGGACUGAGACUGACCUUACUAAAGGACCUCACGAAUUUUGCUCACAGCAUACAAUGCUAGUUAAACAAGGAGAUGAUUACGUGUACCUGCCUUA	15747-15854	-20.3	MiRNA_FJ882951.1_317	Multibranch - No prediction		Yes	No
318	>FJ882951.1_318	ACAGCAUACAAUGCUAGUUAAACAAGGAGAUGAUUACGUGUACCUGCCUUACCCAGAUCCAUCAAGAAUAUUAGGCGCAGGCUGU	15804-15888	-20.4	MiRNA_FJ882951.1_318	Multibranch - No prediction		Yes	No
319	>FJ882951.1_319	GCCUUACCCAGAUCCAUCAAGAAUAUUAGGCGCAGGCUGUUUUGUCGAUGAUAUUGUCAAAACAGAUGGUACACUUAUGAUUGAAAGGUUCGUGUCACUGGC	15849-15950	-28.2	MiRNA_FJ882951.1_319	AUUAGGCGCAGGCUGUUUUG	AAACAGAUGGUACACUUAUGAU	No	Yes
320	>FJ882951.1_320	GUCAAAACAGAUGGUACACUUAUGAUUGAAAGGUUCGUGUCACUGGCUAUUGAUGCUUACCCACUUACAAAACAUCCUAAUCAGGAGUAUGCUGAUGUCUUUCAC	15904-16008	-24.9	MiRNA_FJ882951.1_320	CACUUAUGAUUGAAAGGUUCG	AAACAUCCUAAUCAGGAGUAUG	No	Yes
321	>FJ882951.1_321	UCGUGUCACUGGCUAUUGAUGCUUACCCACUUACAAAACAUCCUAAUCAGGAGUAUGCUGAUGUCUUUCACUUGUAUUUACAAUACAUUAGAAAGUUACAUGA	15938-16040	-25.1	MiRNA_FJ882951.1_321	UCGUGUCACUGGCUAUUGAUG	UACAUUAGAAAGUUACAUGA	No	Yes
322	>FJ882951.1_322	UGGCUAUUGAUGCUUACCCACUUACAAAACAUCCUAAUCAGGAGUAUGCUGAUGUCUUUCACUUGUAUUUACAAUACAUUAGAAAGUUACAUGAUGAGCUUACUGGCCA	15947-16055	-28.9	MiRNA_FJ882951.1_322	Multibranch - No prediction		Yes	No
323	>FJ882951.1_323	GGAGUAUGCUGAUGUCUUUCACUUGUAUUUACAAUACAUUAGAAAGUUACAUGAUGAGCUUACUGGCCACAUGUUGGACAUGUAUUCC	15987-16074	-23.5	MiRNA_FJ882951.1_323	Multibranch - No prediction		Yes	No
324	>FJ882951.1_324	UACAUGAUGAGCUUACUGGCCACAUGUUGGACAUGUAUUCCGUAAUGCUAACUAAUGAUAACACCUCACGGUACUGGGAACCUGAGUUUUAUGAGGCUAUGUA	16034-16136	-24.2	MiRNA_FJ882951.1_324	Multibranch - No prediction		Yes	No
325	>FJ882951.1_325	UACUGGCCACAUGUUGGACAUGUAUUCCGUAAUGCUAACUAAUGAUAACACCUCACGGUACUGGGAACCUGAGUUUUAUGAGGCUAUGUA	16047-16136	-26.2	MiRNA_FJ882951.1_325	Multibranch - No prediction		Yes	No
326	>FJ882951.1_326	GGUACUGGGAACCUGAGUUUUAUGAGGCUAUGUACACACCACAUACAGUCUUGCAGGCUGUAGGUGUUUGUGUAUUGUGCAAUUCACAGACUUCACUUCGUUGCGGUGCC	16103-16212	-45.5	MiRNA_FJ882951.1_326	UAUGUACACACCACAUACAGUC	AGGUGUUUGUGUAUUGUGCAA	No	Yes
327	>FJ882951.1_327	GUUUGUGUAUUGUGCAAUUCACAGACUUCACUUCGUUGCGGUGCCUGUAUUAGGAGACCAUUCCUAUGUUGCAAGUGCUGCUAUGACCAUGUCAUUUCAACAUCACACAAAU	16168-16279	-31.4	MiRNA_FJ882951.1_327	CUUCGUUGCGGUGCCUGUAUU	UGUUGCAAGUGCUGCUAUGAC	No	Yes
328	>FJ882951.1_328	ACAGACUUCACUUCGUUGCGGUGCCUGUAUUAGGAGACCAUUCCUAUGUUGCAAGUGCUGCUAUGACCAUGUCAUUUCAACAUCACACAAAUUAGUGUUGUCUGU	16188-16292	-30.1	MiRNA_FJ882951.1_328	CUUCGUUGCGGUGCCUGUAUU	UGUUGCAAGUGCUGCUAUGAC	No	Yes
330	>FJ882951.1_330	GUCACUGAUGUGACACAACUGUAUCUAGGAGGUAUGAGCUAUUAUUGCAAGUCACAUAAGCCUCCCAUUAGUUUUCCAUUAUGUGC	16327-16412	-22.3	MiRNA_FJ882951.1_330	AACUGUAUCUAGGAGGUAUGAG	UAAGCCUCCCAUUAGUUUUCC	No	Yes
331	>FJ882951.1_331	UAAUGGUCAGGUUUUUGGUUUAUACAAAAACACAUGUGUAGGCAGUGACAAUGUCACUGACUUCAAUGCGAUAGCAACAUGUGAUUGGACUAAUGCUGGCGAUUA	16413-16517	-32.5	MiRNA_FJ882951.1_331	UAUACAAAAACACAUGUGUAGGC	CGAUAGCAACAUGUGAUUGGA	No	Yes
332	>FJ882951.1_332	ACAUGUGUAGGCAGUGACAAUGUCACUGACUUCAAUGCGAUAGCAACAUGUGAUUGGACUAAUGCUGGCGAUUACAUACUUGCCAACACUUGU	16444-16536	-27.9	MiRNA_FJ882951.1_332	Multibranch - No prediction		Yes	No
333	>FJ882951.1_333	CUGAGAGACUCAAGCUUUUCGCAGCAGAAACGCUCAAAGCCACUGAGGAAACAUUUAAGCUGUCAUAUGGUAUUGCUACUGUACGCGAAGUACUCUCUGACAG	16538-16640	-30.3	MiRNA_FJ882951.1_333	Multibranch - No prediction		Yes	No
334	>FJ882951.1_334	UCAAAGCCACUGAGGAAACAUUUAAGCUGUCAUAUGGUAUUGCUACUGUACGCGAAGUACUCUCUGACAGAGAAUUGCAUCUUUCAUGGGAAGUUGG	16571-16667	-30.2	MiRNA_FJ882951.1_334	UGAGGAAACAUUUAAGCUGUC	ACAGAGAAUUGCAUCUUUCAUG	No	Yes
335	>FJ882951.1_335	UACGCGAAGUACUCUCUGACAGAGAAUUGCAUCUUUCAUGGGAAGUUGGAAAACCUAGACCACCAUUGAACAGAAACUAUGUCUUUACUGGUUACCGUGUA	16619-16719	-27.7	MiRNA_FJ882951.1_335	AGAAUUGCAUCUUUCAUGGGAA	ACCAUUGAACAGAAACUAUGU	No	Yes
336	>FJ882951.1_336	CACCAUUGAACAGAAACUAUGUCUUUACUGGUUACCGUGUAACUAAAAAUAGUAAAGUACAGAUUGGAGAGUACACCUUUGAAAAAGGUGACUAUGGUG	16679-16777	-20	MiRNA_FJ882951.1_336	Multibranch - No prediction		Yes	No
338	>FJ882951.1_338	GGUACUACGACAUACAAGUUGAAUGUUGGUGAUUACUUUGUGUUGACAUCUCACACUGUAAUGCCACUUAGUGCACCUACUCUAGUGCC	16795-16883	-27	MiRNA_FJ882951.1_338	AAGUUGAAUGUUGGUGAUUACU	UAAUGCCACUUAGUGCACCUAC	No	Yes
339	>FJ882951.1_339	UGUUGGUGAUUACUUUGUGUUGACAUCUCACACUGUAAUGCCACUUAGUGCACCUACUCUAGUGCCACAAGAGCACUAUGUGAGAAUUACUGGCUUGUACCCAACA	16818-16923	-35.7	MiRNA_FJ882951.1_339	UCACACUGUAAUGCCACUUAGU	CACAAGAGCACUAUGUGAGAAUU	No	Yes
341	>FJ882951.1_341	GCAAAUUAUCAAAAGGUCGGCAUGCAAAAGUACUCUACACUCCAAGGACCACCUGGUACUGGUAAGAGUCAUUUUGCCAUCGGACUUGCUCUCUAUUACCCAUCUGC	16957-17063	-32.4	MiRNA_FJ882951.1_341	GCAUGCAAAAGUACUCUACAC	UAAGAGUCAUUUUGCCAUCGG	No	Yes
342	>FJ882951.1_342	GGCAUGCAAAAGUACUCUACACUCCAAGGACCACCUGGUACUGGUAAGAGUCAUUUUGCCAUCGGACUUGCUCUCUAUUACCCAUCUGCUCGCAUAGUGUAUACGGCAUGCU	16975-17086	-35.7	MiRNA_FJ882951.1_342	AGGACCACCUGGUACUGGUAAG	UCUCUAUUACCCAUCUGCUCGC	No	Yes
343	>FJ882951.1_343	UUGCUCUCUAUUACCCAUCUGCUCGCAUAGUGUAUACGGCAUGCUCUCAUGCAGCUGUUGAUGCCCUAUGUGAAAAGGCAUUAAAAUAUUUGCCCAUAGAUAAA	17042-17145	-28.8	MiRNA_FJ882951.1_343	Multibranch - No prediction		Yes	No
344	>FJ882951.1_344	CAUACCUGCGCGUGCGCGCGUAGAGUGUUUUGAUAAAUUCAAAGUGAAUUCAACACUAGAACAGUAUGUUUUCUGCACUGUAAAUGCAUUG	17157-17247	-24.3	MiRNA_FJ882951.1_344	Multibranch - No prediction		Yes	No
345	>FJ882951.1_345	UCAAAGUGAAUUCAACACUAGAACAGUAUGUUUUCUGCACUGUAAAUGCAUUGCCAGAAACAACUGCUGACAUUGUAGUCUUUGAUGAAAUCUCUAUGG	17195-17293	-24.9	MiRNA_FJ882951.1_345	ACUAGAACAGUAUGUUUUCUGCA	CAGAAACAACUGCUGACAUUGU	No	Yes
346	>FJ882951.1_346	GAUAAAUUCAAAGUGAAUUCAACACUAGAACAGUAUGUUUUCUGCACUGUAAAUGCAUUGCCAGAAACAACUGCUGACAUUGUAGUCUUUGAUGAAAUC	17188-17286	-29.1	MiRNA_FJ882951.1_346	ACUAGAACAGUAUGUUUUCUGCA	CAGAAACAACUGCUGACAUUGU	No	Yes
347	>FJ882951.1_347	AUUGCCAGAAACAACUGCUGACAUUGUAGUCUUUGAUGAAAUCUCUAUGGCUACUAAUUAUGACUUGAGUGUUGUCAAUGCUAGACUUCGUGCAAAACACUACGUCUAUAUUGGCGAU	17244-17361	-32.4	MiRNA_FJ882951.1_347	Multibranch - No prediction		Yes	No
349	>FJ882951.1_349	ACACUACGUCUAUAUUGGCGAUCCUGCUCAAUUACCAGCCCCCCGCACAUUGCUGACUAAAGGCACACUAGAACCAGAAUAUUUUAAUUCAGUGU	17340-17434	-25.7	MiRNA_FJ882951.1_349	Multibranch - No prediction		Yes	No
350	>FJ882951.1_350	UGACUAAAGGCACACUAGAACCAGAAUAUUUUAAUUCAGUGUGCAGACUUAUGAAAACAAUAGGUCCAGACAUGUUCCUUGGAACUUGUCG	17393-17483	-20.7	MiRNA_FJ882951.1_350	Multibranch - No prediction		Yes	No
353	>FJ882951.1_353	GUUCCUUGGAACUUGUCGCCGUUGUCCUGCUGAAAUUGUUGACACUGUGAGUGCUUUAGUUUAUGACAAUAAGCUAAAAGCACACAAGGAUAAGUCAGCUCAAUGC	17466-17571	-28.5	MiRNA_FJ882951.1_353	Multibranch - No prediction		Yes	No
355	>FJ882951.1_355	GGAUUGCCUACGCAGACUGUUGAUUCAUCACAGGGUUCUGAAUAUGACUAUGUCAUAUUCACACAAACUACUGAAACAGCACACUCUUGUAAUGUCAACC	17737-17836	-33.2	MiRNA_FJ882951.1_355	GAUUCAUCACAGGGUUCUGAAU	UCACACAAACUACUGAAACAGC	No	Yes
356	>FJ882951.1_356	UCAUAUUCACACAAACUACUGAAACAGCACACUCUUGUAAUGUCAACCGCUUCAAUGUGGCUAUCACAAGGGCAAAAAUUGGCAUUUUGUGCAUAAUGUCUGAUAGA	17789-17895	-25.9	MiRNA_FJ882951.1_356	UUGUAAUGUCAACCGCUUCAAU	GCAAAAAUUGGCAUUUUGUGCA	No	Yes
357	>FJ882951.1_357	AUGUGGCUAUCACAAGGGCAAAAAUUGGCAUUUUGUGCAUAAUGUCUGAUAGAGAUCUUUAUGACAAACUGCAAUUUACAAGUCUAGAAAUACCACGU	17843-17940	-27.8	MiRNA_FJ882951.1_357	AAAAUUGGCAUUUUGUGCAUAA	UAUGACAAACUGCAAUUUACA	No	Yes
358	>FJ882951.1_358	UGACAAACUGCAAUUUACAAGUCUAGAAAUACCACGUCGCAAUGUGGCUACAUUACAAGCAGAAAAUGUAACUGGACUUUUUAAGGACUGUAGUAAGAUCA	17904-18004	-21.7	MiRNA_FJ882951.1_358	AUUUACAAGUCUAGAAAUACCA	UAACUGGACUUUUUAAGGACUG	No	Yes
359	>FJ882951.1_359	CUGGUCUUCAUCCUACACAGGCACCUACACACCUCAGCGUUGAUAUAAAGUUCAAGACUGAAGGAUUAUGUGUUGACAUACCAG	18008-18091	-23.4	MiRNA_FJ882951.1_359	CUGGUCUUCAUCCUACACAGGC	GAUUAUGUGUUGACAUACCAG	No	Yes
360	>FJ882951.1_360	UUGACAUACCAGGCAUACCAAAGGACAUGACCUACCGUAGACUCAUCUCUAUGAUGGGUUUCAAAAUGAAUUACCAAGUCAA	18080-18161	-20.1	MiRNA_FJ882951.1_360	UACCAAAGGACAUGACCUACCG	UGAUGGGUUUCAAAAUGAAUUA	No	Yes
362	>FJ882951.1_362	UGUUUAUCACCCGCGAAGAAGCUAUUCGUCACGUUCGUGCGUGGAUUGGCUUUGCCGUAGCCGGCUGUCAUGCAACUAGAGAUGCUGUGGGUACUAACCUA	18176-18276	-30.2	MiRNA_FJ882951.1_362	Multibranch - No prediction		Yes	No
363	>FJ882951.1_363	CGUAGCCGGCUGUCAUGCAACUAGAGAUGCUGUGGGUACUAACCUACCUCUCCAGCUAGGAUUUUCUACAGGUGUUAACUUAGUAGCUGUACCGACUGGUUAUG	18231-18334	-34.2	MiRNA_FJ882951.1_363	AGAGAUGCUGUGGGUACUAACC	UUUUCUACAGGUGUUAACUUAG	No	Yes
364	>FJ882951.1_364	GGUGUUAACUUAGUAGCUGUACCGACUGGUUAUGUUGACACUGAAAAUAACACAGAAUUCACCAGAGUUAAUGCAAAACCUCCACCAGGUGACCAGUUUAAACAUCUUAUACC	18301-18413	-27.8	MiRNA_FJ882951.1_364	ACUGGUUAUGUUGACACUGAAA	UUAAUGCAAAACCUCCACCAGG	No	Yes
365	>FJ882951.1_365	UGUACCGACUGGUUAUGUUGACACUGAAAAUAACACAGAAUUCACCAGAGUUAAUGCAAAACCUCCACCAGGUGACCAGUUUAAACAUCUUAUACCACUCAUGUAUA	18318-18424	-29.5	MiRNA_FJ882951.1_365	Multibranch - No prediction		Yes	No
367	>FJ882951.1_367	GGCUUGCCCUGGAAUGUAGUGCGUAUUAAGAUAGUACAAAUGCUCAGUGAUACACUGAAAGGAUUGUCAGACAGAGUCGUGUUCGUCCUUUGGGCGCAUGGCUUUGAGCU	18427-18536	-35.6	MiRNA_FJ882951.1_367	Multibranch - No prediction		Yes	No
368	>FJ882951.1_368	ACACUGAAAGGAUUGUCAGACAGAGUCGUGUUCGUCCUUUGGGCGCAUGGCUUUGAGCUUACAUCAAUGAAGUACUUUGUCAAGAUUGGACCUGAAAGAACGUGU	18478-18582	-32.9	MiRNA_FJ882951.1_368	AGACAGAGUCGUGUUCGUCCUU	CAUCAAUGAAGUACUUUGUCAAG	No	Yes
369	>FJ882951.1_369	UGAGCUUACAUCAAUGAAGUACUUUGUCAAGAUUGGACCUGAAAGAACGUGUUGUCUGUGUGACAAACGUGCAACUUGCUUUUCUACUUCAUCAGAUACUUA	18531-18632	-26.9	MiRNA_FJ882951.1_369	GAAGUACUUUGUCAAGAUUGGAC	UGCAACUUGCUUUUCUACUUCAU	No	Yes
370	>FJ882951.1_370	GUCAAGAUUGGACCUGAAAGAACGUGUUGUCUGUGUGACAAACGUGCAACUUGCUUUUCUACUUCAUCAGAUACUUAUGCCUGCUGGAAUCAUUCUGUGGGUUUUGAC	18556-18663	-25.5	MiRNA_FJ882951.1_370	Multibranch - No prediction		Yes	No
371	>FJ882951.1_371	UACUUCAUCAGAUACUUAUGCCUGCUGGAAUCAUUCUGUGGGUUUUGACUAUGUCUAUAACCCAUUUAUGAUUGAUGUUCAGCAGUGGGGCUUUACGGGUAACCUUCAGAGUA	18615-18727	-32.1	MiRNA_FJ882951.1_371	UGCUGGAAUCAUUCUGUGGGUU	ACCCAUUUAUGAUUGAUGUUCA	No	Yes
372	>FJ882951.1_372	UACUUCAUCAGAUACUUAUGCCUGCUGGAAUCAUUCUGUGGGUUUUGACUAUGUCUAUAACCCAUUUAUGAUUGAUGUUCAGCAGUGGGGCUUUACGGGUA	18615-18715	-32.1	MiRNA_FJ882951.1_372	UGCUGGAAUCAUUCUGUGGGUU	ACCCAUUUAUGAUUGAUGUUCA	No	Yes
373	>FJ882951.1_373	GACCAACAUUGCCAGGUACAUGGAAAUGCACAUGUGGCUAGUUGUGAUGCUAUCAUGACUAGAUGUUUAGCAGUCCAUGAGUGCUUUGUUAAGCGCGUUGAUUGGUC	18733-18839	-33.1	MiRNA_FJ882951.1_373	CCAGGUACAUGGAAAUGCACAU	UCCAUGAGUGCUUUGUUAAGCG	No	Yes
374	>FJ882951.1_374	UCAUGACUAGAUGUUUAGCAGUCCAUGAGUGCUUUGUUAAGCGCGUUGAUUGGUCUGUUGAAUACCCUAUUAUAGGAGAUGA	18785-18866	-27.2	MiRNA_FJ882951.1_374	AGAUGUUUAGCAGUCCAUGAGUG	UUGAUUGGUCUGUUGAAUACC	No	Yes
376	>FJ882951.1_376	AGUCUGCCCUCCUGGCUGAUAAGUUUCCAGUUCUUCAUGACAUUGGAAAUCCAAAGGCUAUCAAGUGUGUGCCUCAGGCU	18914-18993	-23.1	MiRNA_FJ882951.1_376	Multibranch - No prediction		Yes	No
377	>FJ882951.1_377	UGGAAAUCCAAAGGCUAUCAAGUGUGUGCCUCAGGCUGAAGUAGAAUGGAAGUUCUACGAUGCUCAGCCAUGUAGUGACAAAGCUUACAAAAUAGAGGAGCUCUUCUA	18957-19064	-34.8	MiRNA_FJ882951.1_377	AAGUGUGUGCCUCAGGCUGAAG	UCAGCCAUGUAGUGACAAAGCUU	No	Yes
378	>FJ882951.1_378	UCAGCCAUGUAGUGACAAAGCUUACAAAAUAGAGGAGCUCUUCUAUUCUUAUGCUACACAUCACGAUAAAUUCACUGAUGGUGUUUGUUUGUUUUGGAAUUGUAACGUUGA	19020-19130	-26.3	MiRNA_FJ882951.1_378	Multibranch - No prediction		Yes	No
379	>FJ882951.1_379	AUUGUAACGUUGAUCGUUACCCAGCCAAUGCAAUUGUGUGUAGGUUUGACACAAGAGUCUUGUCAAACUUGAACUUACCAGGCUGUGAUGGUGGUAGUUUGUAU	19118-19221	-25.7	MiRNA_FJ882951.1_379	Multibranch - No prediction		Yes	No
380	>FJ882951.1_380	GAGUCUUGUCAAACUUGAACUUACCAGGCUGUGAUGGUGGUAGUUUGUAUGUGAAUAAGCAUGCAUUCCACACUCCAGCUUUCGAUAAAAGUGCAUUUACUAAUUU	19172-19277	-27.5	MiRNA_FJ882951.1_380	GAACUUACCAGGCUGUGAUGGU	CAUUCCACACUCCAGCUUUCG	No	Yes
382	>FJ882951.1_382	CAAGUAGUGUCGGAUAUUGAUUAUGUUCCACUCAAAUCUGCUACGUGUAUUACACGAUGCAAUUUAGGUGGUGCUGUUUGCAGACACCAUGCAAAUGAGUACCGACAGUACUUG	19333-19446	-35.4	MiRNA_FJ882951.1_382	Multibranch - No prediction		Yes	No
383	>FJ882951.1_383	AAAUCUGCUACGUGUAUUACACGAUGCAAUUUAGGUGGUGCUGUUUGCAGACACCAUGCAAAUGAGUACCGACAGUACUUGGAUGCAUAUAAUAUGAUGAUUU	19366-19468	-31.1	MiRNA_FJ882951.1_383	Multibranch - No prediction		Yes	No
384	>FJ882951.1_384	CCAUGCAAAUGAGUACCGACAGUACUUGGAUGCAUAUAAUAUGAUGAUUUCUGCUGGAUUUAGCCUAUGGAUUUACAAACAAUUUGAUACUUAUAACCUGUGG	19419-19521	-22.4	MiRNA_FJ882951.1_384	ACCGACAGUACUUGGAUGCAU	UGGAUUUACAAACAAUUUGAUA	No	Yes
385	>FJ882951.1_385	CCUAUGGAUUUACAAACAAUUUGAUACUUAUAACCUGUGGAAUACAUUUACCAGGUUACAGAGUUUAGAAAAUGUGGCUUAUAAUGUUGUUAAUAAAGG	19482-19580	-25.6	MiRNA_FJ882951.1_385	AACAAUUUGAUACUUAUAACCU	UUACAGAGUUUAGAAAAUGUGG	No	Yes
386	>FJ882951.1_386	GUUUAGAAAAUGUGGCUUAUAAUGUUGUUAAUAAAGGACACUUUGAUGGACACGCCGGCGAAGCACCUGUUUCCAUCAUUAAUAAUGCUGUUUACACAAAGGUAGAU	19544-19650	-25.9	MiRNA_FJ882951.1_386	UGGCUUAUAAUGUUGUUAAUA	UUCCAUCAUUAAUAAUGCUGUU	No	Yes
387	>FJ882951.1_387	CGAAGCACCUGUUUCCAUCAUUAAUAAUGCUGUUUACACAAAGGUAGAUGGUAUUGAUGUGGAGAUCUUUGAAAAUAAGACAACACUUCCUGUUAAUGUUGCAUUUGAGCUUUG	19602-19715	-25.8	MiRNA_FJ882951.1_387	Multibranch - No prediction		Yes	No
388	>FJ882951.1_388	UGUGGAGAUCUUUGAAAAUAAGACAACACUUCCUGUUAAUGUUGCAUUUGAGCUUUGGGCUAAGCGUAACAUUAAACCAGUGCCAGAGAUUAAGAUACUCAAUA	19659-19762	-24.7	MiRNA_FJ882951.1_388	CUUCCUGUUAAUGUUGCAUUU	GCGUAACAUUAAACCAGUGCCA	No	Yes
389	>FJ882951.1_389	GGUAUUGAUGUGGAGAUCUUUGAAAAUAAGACAACACUUCCUGUUAAUGUUGCAUUUGAGCUUUGGGCUAAGCGUAACAUUAAACCAGUGCCAGAGAUUAAGAUACU	19651-19757	-25.8	MiRNA_FJ882951.1_389	CUUCCUGUUAAUGUUGCAUUU	GCGUAACAUUAAACCAGUGCCA	No	Yes
390	>FJ882951.1_390	AUAAGACAACACUUCCUGUUAAUGUUGCAUUUGAGCUUUGGGCUAAGCGUAACAUUAAACCAGUGCCAGAGAUUAAGAUACUCAAUAAUUUGGGUGUUGAUAU	19676-19778	-25.3	MiRNA_FJ882951.1_390	Multibranch - No prediction		Yes	No
391	>FJ882951.1_391	UGGGCUAAGCGUAACAUUAAACCAGUGCCAGAGAUUAAGAUACUCAAUAAUUUGGGUGUUGAUAUCGCUGCUAAUACUGUAAUCUGGGACUA	19714-19805	-21	MiRNA_FJ882951.1_391	Multibranch - No prediction		Yes	No
392	>FJ882951.1_392	UCAAUAAUUUGGGUGUUGAUAUCGCUGCUAAUACUGUAAUCUGGGACUAUAAAAGAGAAGCCCCAGCACAUGUAUCUACAAUAGGUGUCUGCACAAUGACUGA	19757-19859	-32.1	MiRNA_FJ882951.1_392	UGGGUGUUGAUAUCGCUGCUAAU	UAGGUGUCUGCACAAUGACUGA	No	Yes
393	>FJ882951.1_393	GGACUAUAAAAGAGAAGCCCCAGCACAUGUAUCUACAAUAGGUGUCUGCACAAUGACUGACAUUGCCAAGAAACCUACUGAGAGUGCUUGUUCUUCACUUACUGUCU	19800-19906	-36.6	MiRNA_FJ882951.1_393	AUCUACAAUAGGUGUCUGCACA	CCAAGAAACCUACUGAGAGUGC	No	Yes
394	>FJ882951.1_394	CAUUGCCAAGAAACCUACUGAGAGUGCUUGUUCUUCACUUACUGUCUUGUUUGAUGGUAGAGUGGAAGGACAGGUAGACCUUUUUAGAAACGCCCGUAAUG	19860-19960	-29.4	MiRNA_FJ882951.1_394	AGUGCUUGUUCUUCACUUACU	UAGAGUGGAAGGACAGGUAGAC	No	Yes
395	>FJ882951.1_395	GUCUUGUUUGAUGGUAGAGUGGAAGGACAGGUAGACCUUUUUAGAAACGCCCGUAAUGGUGUUUUAAUAACAGAAGGUUCAGUCAAAGGUCUAACACCUUCAAAGGGAC	19903-20011	-35.4	MiRNA_FJ882951.1_395	AGGUAGACCUUUUUAGAAACG	UUUUAAUAACAGAAGGUUCAGU	No	Yes
396	>FJ882951.1_396	UCUAACACCUUCAAAGGGACCAGCACAAGCUAGCGUCAAUGGAGUCACAUUAAUUGGA	19992-20049	-11.8	MiRNA_FJ882951.1_396	UAACACCUUCAAAGGGACCAG	GCUAGCGUCAAUGGAGUCACA	No	No
397	>FJ882951.1_397	CAGCACAAGCUAGCGUCAAUGGAGUCACAUUAAUUGGAGAAUCAGUAAAAACACAGUUUAACUACUCUAAGAAAGUAGACGGCAUUAUUCAACAGUUGCCUG	20012-20113	-22.5	MiRNA_FJ882951.1_397	GAGUCACAUUAAUUGGAGAAU	UACUCUAAGAAAGUAGACGGCA	No	Yes
398	>FJ882951.1_398	AGAAUCAGUAAAAACACAGUUUAACUACUCUAAGAAAGUAGACGGCAUUAUUCAACAGUUGCCUGAAACCUACUUUACUCAGAGCAGAGACUUAGAGGAUUUU	20049-20151	-27	MiRNA_FJ882951.1_398	UAACUACUCUAAGAAAGUAGA	UACUUUACUCAGAGCAGAGACU	No	Yes
399	>FJ882951.1_399	GUUUAACUACUCUAAGAAAGUAGACGGCAUUAUUCAACAGUUGCCUGAAACCUACUUUACUCAGAGCAGAGACUUAGAGGAUUUUAAGC	20067-20155	-20.6	MiRNA_FJ882951.1_399	UACUCUAAGAAAGUAGACGGCA	UUGCCUGAAACCUACUUUACU	No	Yes
400	>FJ882951.1_400	GACUUUCUCGAGCUCGCUAUGGAUGAAUUCAUACAGCGAUAUAAGCUCGAGGGCUAUGCCUUCGAACACAUCGUUUAUGGAGAUUUCAGUCAUGGACAACUUGGCGGUC	20176-20284	-46.1	MiRNA_FJ882951.1_400	UCGCUAUGGAUGAAUUCAUAC	GAGAUUUCAGUCAUGGACAAC	No	Yes
401	>FJ882951.1_401	GCUCGAGGGCUAUGCCUUCGAACACAUCGUUUAUGGAGAUUUCAGUCAUGGACAACUUGGCGGUCUUCAUUUAAUGAUAGGCUUAGCCAAGC	20220-20311	-35.8	MiRNA_FJ882951.1_401	Multibranch - No prediction		Yes	No
402	>FJ882951.1_402	UAUGGACAGCACAGUGAAAAAUUACUUCAUAACAGAUGCGCAAACAGGUUCAUCAAAAUGUGUGUGUUCUGUGAUUGAUCUUUUACUUGAUGACUUUGUCGAGAUA	20352-20457	-28.9	MiRNA_FJ882951.1_402	UGAAAAAUUACUUCAUAACAGA	UGUUCUGUGAUUGAUCUUUUACU	No	Yes
405	>FJ882951.1_405	CUAUGCUGAGAUUUCAUUCAUGCUUUGGUGUAAGGACGGACAUGUUGAAACCUUCUACCCAAAACUACAAGCAAGUCAAGCGUGG	20511-20595	-23.1	MiRNA_FJ882951.1_405	UCAUUCAUGCUUUGGUGUAAGGA	UUCUACCCAAAACUACAAGCAA	No	Yes
406	>FJ882951.1_406	ACAUGUUGAAACCUUCUACCCAAAACUACAAGCAAGUCAAGCGUGGCAACCAGGUGUUGCGAUGCCUAACUUGUACAAGAUGCAAAGAAUGCUUCUUGAAAAGUGU	20550-20655	-34.3	MiRNA_FJ882951.1_406	Multibranch - No prediction		Yes	No
408	>FJ882951.1_408	ACUUAAAUACACUUACUUUAGCUGUACCCUACAACAUGAGAGUUAUUCACUUUGGUGCUGGCUCUGAUAAAGGAGUUGCACCAGGUACAGCUGUGCUCAGACAAUGGU	20738-20845	-35.8	MiRNA_FJ882951.1_408	UUAGCUGUACCCUACAACAUG	UUGCACCAGGUACAGCUGUGC	No	Yes
411	>FJ882951.1_411	GUUGCACCAGGUACAGCUGUGCUCAGACAAUGGUUGCCAACUGGCACACUACUUGUCGAUUCAGAUCUUAAUGACUUCGUCUCCGAC	20812-20898	-21.5	MiRNA_FJ882951.1_411	Multibranch - No prediction		Yes	No
412	>FJ882951.1_412	UUCUACUUUAAUUGGAGACUGUGCAACAGUACAUACGGCUAAUAAAUGGGACCUUAUUAUUAGCGAUAUGUAUGACCCUAGGACCAAACAUGUGACAA	20904-21001	-24.6	MiRNA_FJ882951.1_412	ACUGUGCAACAGUACAUACGGC	UAUGUAUGACCCUAGGACCAAA	No	Yes
416	>FJ882951.1_416	GGCCAUUUCUCAUGGUGGACAGCUUUUGUUACAAAUGUAAAUGCAUCAUCAUCGGAAGCAUUUUUAAUUGGGGCUAACUAUCUUGGCAAGCC	21133-21224	-30.1	MiRNA_FJ882951.1_416	ACAGCUUUUGUUACAAAUGUAA	UUAAUUGGGGCUAACUAUCUUG	No	Yes
417	>FJ882951.1_417	GGCCAUUUCUCAUGGUGGACAGCUUUUGUUACAAAUGUAAAUGCAUCAUCAUCGGAAGCAUUUUUAAUUGGGGCUAACUAUCUUGGCAAGCCGAAGGAACAAAUUGAUGGCU	21133-21244	-21.8	MiRNA_FJ882951.1_417	ACAGCUUUUGUUACAAAUGUAA	UUAAUUGGGGCUAACUAUCUUG	No	Yes
419	>FJ882951.1_419	AUUUUCUGGAGGAACACAAAUCCUAUCCAGUUGUCUUCCUAUUCACUCUUUGACAUGAGCAAAUUUCCUCUUAAAUUAAGAGGAACUGCUGUAAUGUCUCUUAAGGAGAAU	21265-21375	-29.5	MiRNA_FJ882951.1_419	Multibranch - No prediction		Yes	No
420	>FJ882951.1_420	UUUCCUCUUAAAUUAAGAGGAACUGCUGUAAUGUCUCUUAAGGAGAAUCAAAUCAAUGAUAUGAUUUAUUCUCUUCUGGAAAAAGGUAGGCUUAUCAUUAGAGAAAA	21328-21434	-33.6	MiRNA_FJ882951.1_420	Multibranch - No prediction		Yes	No
421	>FJ882951.1_421	GGUAGGCUUAUCAUUAGAGAAAACAACAGAGUUGUGGUUUCAAGUGAUAUUCUUGUUAACAACUAAACGAACAUGUUUAUUUUCUUAUUAUUUCUUACU	21412-21510	-23.3	MiRNA_FJ882951.1_421	Multibranch - No prediction		Yes	No
422	>FJ882951.1_422	GAACAUGUUUAUUUUCUUAUUAUUUCUUACUCUCACUAGUGGUAGUGACCUUGACCGGUGCACCACUUUUGAUGAUGUUCAAGCUCCUAAUUACACUCAACAUACUUC	21480-21587	-25.5	MiRNA_FJ882951.1_422	ACUCUCACUAGUGGUAGUGACC	UGCACCACUUUUGAUGAUGUUC	No	Yes
424	>FJ882951.1_424	AACAUACUUCAUCUAUGAGGGGGGUUUACUAUCCUGAUGAAAUUUUUAGAUCAGACACUCUUUAUUUAACUCAGGAUUUAUUUCUUCCAUUUUAUUCUAAUGUU	21578-21681	-24.8	MiRNA_FJ882951.1_424	GGGGUUUACUAUCCUGAUGAAA	UAACUCAGGAUUUAUUUCUUCC	No	Yes
427	>FJ882951.1_427	AGGAUGGUAUUUAUUUUGCUGCCACAGAGAAAUCAAAUGUUGUCCGUGGUUGGGUUUUUGGUUCUACCAUGAACAACAAGUCACAGUCGGUGAUUAUUAUUAACAAUUCU	21734-21843	-27.4	MiRNA_FJ882951.1_427	Multibranch - No prediction		Yes	No
428	>FJ882951.1_428	GUCGGUGAUUAUUAUUAACAAUUCUACUAAUGUUGUUAUACGAGCAUGUAACUUUGAAUUGUGUGACAACCCUUUCUUUGCUGUUUCUAAACCCAUGGGUAC	21819-21920	-21.6	MiRNA_FJ882951.1_428	CAAUUCUACUAAUGUUGUUAUACG	UGUGACAACCCUUUCUUUGCU	No	Yes
430	>FJ882951.1_430	GGGUACACAGACACAUACUAUGAUAUUCGAUAAUGCAUUUAAUUGCACUUUCGAGUACAUAUCUGAUGCCU	21915-21985	-26.1	MiRNA_FJ882951.1_430	ACACAUACUAUGAUAUUCGAUA	UUCGAGUACAUAUCUGAUGCCU	No	Yes
431	>FJ882951.1_431	GGGUACACAGACACAUACUAUGAUAUUCGAUAAUGCAUUUAAUUGCACUUUCGAGUACAUAUCUGAUGCCUUUUCGCUUGAUGUUUCAGAAAAGUCAGGUAAUU	21915-22018	-21.9	MiRNA_FJ882951.1_431	Multibranch - No prediction		Yes	No
433	>FJ882951.1_433	UGAUGCCUUUUCGCUUGAUGUUUCAGAAAAGUCAGGUAAUUUUAAACACUUACGAGAGUUUGUGUUUAAAAAUAAAGAUGGGUUUCUCUAUGUUUAUAAGGGCUAUCA	21978-22085	-29.3	MiRNA_FJ882951.1_433	Multibranch - No prediction		Yes	No
434	>FJ882951.1_434	AUGUUUAUAAGGGCUAUCAACCUAUAGAUGUAGUUCGUGAUCUACCUUCUGGUUUUAACACUUUGAAACCUAUUUUUAAGUUGCCUCUUGGUAUUAACAU	22067-22166	-23	MiRNA_FJ882951.1_434	Multibranch - No prediction		Yes	No
436	>FJ882951.1_436	UAUAGAUGUAGUUCGUGAUCUACCUUCUGGUUUUAACACUUUGAAACCUAUUUUUAAGUUGCCUCUUGGUAUUAACAUUACAAAUUUUAGAGCCAUUCUUA	22089-22189	-21.1	MiRNA_FJ882951.1_436	Multibranch - No prediction		Yes	No
437	>FJ882951.1_437	UUUGGGGCACGUCAGCUGCAGCCUAUUUUGUUGGCUAUUUAAAGCCAACUACAUUUAUGCUCAAGUAUGAUGAAAAUGGUACAAUCACAGAUGCUGUUGAUUGUUCUCAAA	22214-22324	-33.1	MiRNA_FJ882951.1_437	Multibranch - No prediction		Yes	No
439	>FJ882951.1_439	UCUCAAAAUCCACUUGCUGAACUCAAAUGCUCUGUUAAGAGCUUUGAGAUUGACAAAGGAAUUUACCAGACCUCUAAUUUCAGGGUUGUUCCCUCAGGAGAUGUUGUGAGA	22318-22428	-34.8	MiRNA_FJ882951.1_439	Multibranch - No prediction		Yes	No
440	>FJ882951.1_440	GGAAUUUACCAGACCUCUAAUUUCAGGGUUGUUCCCUCAGGAGAUGUUGUGAGAUUCCCUAAUAUUACAAACUUGUGUCCUUUUGGAGAGGUUUUUAAUGCUACUAAAUUCC	22375-22486	-30.6	MiRNA_FJ882951.1_440	Multibranch - No prediction		Yes	No
443	>FJ882951.1_443	CAGAUUCUUUUGUAGUCAAGGGAGAUGAUGUAAGACAAAUAGCGCCAGGACAAACUGGUGUUAUUGCUGAUUAUAAUUAUAAAUUGCCAGAUGAUUUCAUGGGUUG	22634-22739	-31.5	MiRNA_FJ882951.1_443	Multibranch - No prediction		Yes	No
444	>FJ882951.1_444	UGCUGAUUAUAAUUAUAAAUUGCCAGAUGAUUUCAUGGGUUGUGUCCUUGCUUGGAAUACUAGGAACAUUGAUGCUACUUCAACUGGUAAUCAUAAUUAUAAAUAUAGGUA	22698-22808	-32	MiRNA_FJ882951.1_444	UUGCCAGAUGAUUUCAUGGGUU	UACUUCAACUGGUAAUCAUAAU	No	Yes
445	>FJ882951.1_445	AUAAUUAUAAAUAUAGGUAUCUUAGACAUGGCAAGCUUAGGCCCUUUGAGAGAGACAUAUCUAAUGUGCCUUUCUCCCCUGAUGGCAAACCUUGCACCCCACCUGCUCUUAAUUGU	22790-22905	-31.8	MiRNA_FJ882951.1_445	AUGGCAAGCUUAGGCCCUUUGA	UGAUGGCAAACCUUGCACCC	No	Yes
446	>FJ882951.1_446	ACCUGCUCUUAAUUGUUAUUGGCCAUUAAAUGAUUAUGGUUUUUACACCACUACUGGCAUUGGCUACCAACCUUACAGAGUUGU	22890-22973	-26.8	MiRNA_FJ882951.1_446	CCUGCUCUUAAUUGUUAUUGGC	CUACCAACCUUACAGAGUUGU	No	Yes
447	>FJ882951.1_447	GCAUUGGCUACCAACCUUACAGAGUUGUAGUACUUUCUUUUGAACUUUUAAAUGCACCGGCCACGGUUUGUGGACCAAAAUUAUCCACUGACCUUAUUAAGAACCAGUGU	22946-23055	-27.8	MiRNA_FJ882951.1_447	Multibranch - No prediction		Yes	No
448	>FJ882951.1_448	UGACCUUAUUAAGAACCAGUGUGUCAAUUUUAAUUUUAAUGGACUCACUGGUACUGGUGUGUUA	23034-23097	-22.8	MiRNA_FJ882951.1_448	CUUAUUAAGAACCAGUGUGUCA	ACUCACUGGUACUGGUGUGUUA	No	Yes
449	>FJ882951.1_449	CAGUGUGUCAAUUUUAAUUUUAAUGGACUCACUGGUACUGGUGUGUUAACUCCUUCUUCAAAGAGAUUUCAACCAUUUCAACAAUUUGGCCGUGAUGUUUCUGAUUUCACUG	23050-23161	-25.7	MiRNA_FJ882951.1_449	Multibranch - No prediction		Yes	No
450	>FJ882951.1_450	GGUGUGUUAACUCCUUCUUCAAAGAGAUUUCAACCAUUUCAACAAUUUGGCCGUGAUGUUUCUGAUUUCACUGAUUCCGUUCGAGAUCCUAAAACAUC	23089-23186	-22.6	MiRNA_FJ882951.1_450	Multibranch - No prediction		Yes	No
451	>FJ882951.1_451	ACCAUUUCAACAAUUUGGCCGUGAUGUUUCUGAUUUCACUGAUUCCGUUCGAGAUCCUAAAACAUCUGAAAUAUUAGACAUUUCGCCUUGCUCUUUUGGGGGUGU	23121-23225	-22.5	MiRNA_FJ882951.1_451	UGAUGUUUCUGAUUUCACUGAUU	UCUGAAAUAUUAGACAUUUCG	No	Yes
452	>FJ882951.1_452	AACAUCUGAAAUAUUAGACAUUUCGCCUUGCUCUUUUGGGGGUGUAAGUGUAAUUACACCUGGAACAAAUGCUUCAUCUGAAGUUGCUGUUCUAUAUCAAGAUGUU	23181-23286	-32.7	MiRNA_FJ882951.1_452	Multibranch - No prediction		Yes	No
453	>FJ882951.1_453	UUGCUCUUUUGGGGGUGUAAGUGUAAUUACACCUGGAACAAAUGCUUCAUCUGAAGUUGCUGUUCUAUAUCAAGAUGUUAACUGCACUGAUGUUUCUACAGCAA	23208-23311	-35.3	MiRNA_FJ882951.1_453	Multibranch - No prediction		Yes	No
454	>FJ882951.1_454	GUUAACUGCACUGAUGUUUCUACAGCAAUUCAUGCAGAUCAACUCACACCAGCUUGGCGCAUAUAUUCUACUGGAAACAAUGUAUUCCAGAC	23284-23375	-24.9	MiRNA_FJ882951.1_454	Multibranch - No prediction		Yes	No
455	>FJ882951.1_455	CAGACUCAAGCAGGCUGUCUUAUAGGAGCUGAGCAUGUCGACACUUCUUAUGAGUGCGACAUUCCUAUUGGAGCUGGCAUUUG	23371-23453	-24.8	MiRNA_FJ882951.1_455	UGUCUUAUAGGAGCUGAGCAUG	UGCGACAUUCCUAUUGGAGCUG	No	Yes
456	>FJ882951.1_456	GGCAUUUGUGCUAGUUACCAUACAGUUUCUUUAUUACGUAGUACUAGCCAAAAAUCUAUUGUGGCUUAUACUAUGUCUUUAGGUGCUGAUAGUUCAAUUGCU	23446-23547	-42.6	MiRNA_FJ882951.1_456	UCUUUAUUACGUAGUACUAGC	UUAUACUAUGUCUUUAGGUGC	No	Yes
457	>FJ882951.1_457	UACUACAGAAGUAAUGCCUGUUUCUAUGGCUAAAACCUCCGUAGAUUGUAAUAUGUACAUCUGCGGAGAUUCUACUGAAUGUGCUAAUUUGCUUCUCCAAUAUGGUA	23595-23701	-26.3	MiRNA_FJ882951.1_457	UCUAUGGCUAAAACCUCCGUAGA	UGCGGAGAUUCUACUGAAUGUG	No	Yes
458	>FJ882951.1_458	AUCUGCGGAGAUUCUACUGAAUGUGCUAAUUUGCUUCUCCAAUAUGGUAGCUUUUGCACACAACUAAAUCGUGCACUCUCAGGU	23653-23736	-20.6	MiRNA_FJ882951.1_458	UGCGGAGAUUCUACUGAAUGUGC	CAACUAAAUCGUGCACUCUCAGG	No	Yes
460	>FJ882951.1_460	AGGAUCGCAACACACGUGAAGUGUUCGCUCAAGUCAAACAAAUGUACAAAACCCCAACUUUGAAAUAUUUUGGUGGUUUUAAUUUUUCACAAAUGUUACCUGACCCU	23750-23856	-24.2	MiRNA_FJ882951.1_460	CAACACACGUGAAGUGUUCGC	UAAUUUUUCACAAAUGUUACC	No	Yes
461	>FJ882951.1_461	GUUUUAAUUUUUCACAAAUGUUACCUGACCCUCUAAAGCCAACUAAGAGGUCUUUUAUUGAGGACUUGCUCUUUAAUAAGGUGACACUCGCUGAUGCUGGC	23825-23925	-25.2	MiRNA_FJ882951.1_461	AGCCAACUAAGAGGUCUUUUAUU	GGUGACACUCGCUGAUGCUGGC	No	Yes
462	>FJ882951.1_462	AAUGUUACCUGACCCUCUAAAGCCAACUAAGAGGUCUUUUAUUGAGGACUUGCUCUUUAAUAAGGUGACACUCGCUGAUGCUGGCUUCAUGAAGCAAUAUGGCGAAUGCCUAGGUGAUAUU	23841-23961	-36.2	MiRNA_FJ882951.1_462	Multibranch - No prediction		Yes	No
463	>FJ882951.1_463	UAUUAAUGCUAGAGAUCUCAUUUGUGCGCAGAAGUUCAAUGGACUUACAGUGUUGCCACCUCUGCUCACUGAUGAUAUGAUUGCUGCCUACACGGCUGCUCUAGUUAGUGGUA	23958-24070	-34.9	MiRNA_FJ882951.1_463	Multibranch - No prediction		Yes	No
466	>FJ882951.1_466	GGACAUUUGGUGCUGGCGCUGCUCUUCAAAUACCUUUUGCUAUGCAAAUGGCAUAUAGGUUCAAUGGCAUUGGAGUUACCCAAAAUGUUC	24086-24175	-27.9	MiRNA_FJ882951.1_466	GCGCUGCUCUUCAAAUACCUUU	UAUAGGUUCAAUGGCAUUGGAG	No	Yes
468	>FJ882951.1_468	CAUUGGGCAAGCUGCAAGACGUUGUUAACCAGAAUGCUCAAGCAUUAAACACACUUGUUAAACAACUUAGCUCUAAUUUUGGUGCAAUUUCAAGUGUGCUAAAUG	24260-24364	-32.9	MiRNA_FJ882951.1_468	Multibranch - No prediction		Yes	No
469	>FJ882951.1_469	UUUGGUGCAAUUUCAAGUGUGCUAAAUGAUAUCCUUUCGCGACUUGAUAAAGUCGAGGCGGAGGUACAAAUUGACAGGUUAAUUACAGGCAGACUUCAAAGCCUUCAAA	24337-24445	-27	MiRNA_FJ882951.1_469	Multibranch - No prediction		Yes	No
470	>FJ882951.1_470	AGUCGAGGCGGAGGUACAAAUUGACAGGUUAAUUACAGGCAGACUUCAAAGCCUUCAAACCUAUGUAACACAACAACUAAUCAGGGCUGCUGAAAUCAGGGCUUCUGCU	24387-24495	-25.2	MiRNA_FJ882951.1_470	AGACUUCAAAGCCUUCAAACC	UAAUCAGGGCUGCUGAAAUCAG	No	Yes
471	>FJ882951.1_471	GGCAGACUUCAAAGCCUUCAAACCUAUGUAACACAACAACUAAUCAGGGCUGCUGAAAUCAGGGCUUCUGCU	24424-24495	-23	MiRNA_FJ882951.1_471	AGACUUCAAAGCCUUCAAACC	UAAUCAGGGCUGCUGAAAUCAG	No	Yes
473	>FJ882951.1_473	UGAGUGUGUUCUUGGACAAUCAAAAAGAGUUGACUUUUGUGGAAAGGGCUACCACCUUAUGUCCUUCCCACAAGCAGCCCCGCAUGGUGUUGUCUUCCUACAUGUCA	24519-24625	-34.1	MiRNA_FJ882951.1_473	AGUUGACUUUUGUGGAAAGGGC	UCCUUCCCACAAGCAGCCCCGC	No	Yes
475	>FJ882951.1_475	GUGUUGUCUUCCUACAUGUCACGUAUGUGCCAUCCCAGGAGAGGAACUUCACCACAGCGCCAGCAAUUUGUCAUGAAGGCAAAGC	24605-24689	-24.4	MiRNA_FJ882951.1_475	UCCUACAUGUCACGUAUGUGC	ACAGCGCCAGCAAUUUGUCAUG	No	Yes
476	>FJ882951.1_476	GUGCCAUCCCAGGAGAGGAACUUCACCACAGCGCCAGCAAUUUGUCAUGAAGGCAAAGCAUACUUCCCUCGUGAAGGUGUUUUUGUGUUUAAUGGCAC	24631-24728	-29.3	MiRNA_FJ882951.1_476	AGAGGAACUUCACCACAGCGCC	CCUCGUGAAGGUGUUUUUGUGU	No	Yes
477	>FJ882951.1_477	CCAGGAGAGGAACUUCACCACAGCGCCAGCAAUUUGUCAUGAAGGCAAAGCAUACUUCCCUCGUGAAGGUGUUUUUGUGUUUAAUGGCACUUCUUGG	24639-24735	-27.4	MiRNA_FJ882951.1_477	Multibranch - No prediction		Yes	No
478	>FJ882951.1_478	AGGCAAAGCAUACUUCCCUCGUGAAGGUGUUUUUGUGUUUAAUGGCACUUCUUGGUUUAUUACACAGAGGAACUUCUUUUCUCCACAAAUAAUUACUACAGACAAUACAUUUGUCU	24681-24796	-26.5	MiRNA_FJ882951.1_478	Multibranch - No prediction		Yes	No
479	>FJ882951.1_479	GUGUUUAAUGGCACUUCUUGGUUUAUUACACAGAGGAACUUCUUUUCUCCACAAAUAAUUACUACAGACAAUACAUUUGUCUCAGGAAAUUGUGAUGUCGUUAUUGGCAU	24715-24824	-25.2	MiRNA_FJ882951.1_479	Multibranch - No prediction		Yes	No
480	>FJ882951.1_480	GACAAUACAUUUGUCUCAGGAAAUUGUGAUGUCGUUAUUGGCAUCAUUAACAACACAGUUUAUGAUCCUCUGCAACCUGAGCUC	24781-24864	-20.1	MiRNA_FJ882951.1_480	Multibranch - No prediction		Yes	No
482	>FJ882951.1_482	CCUGAGCUCGACUCAUUCAAAGAAGAGCUGGACAAGUACUUCAAAAAUCAUACAUCACCAGAUGUUGAUCUUGGCGACAUUUCAGG	24856-24941	-23.7	MiRNA_FJ882951.1_482	Multibranch - No prediction		Yes	No
483	>FJ882951.1_483	ACUUCAAAAAUCAUACAUCACCAGAUGUUGAUCUUGGCGACAUUUCAGGCAUUAACGCUUCUGUCGUCAACAUUCAAAAAGAAAUUGACCGCCUCAAUGAGGU	24893-24995	-29.4	MiRNA_FJ882951.1_483	Multibranch - No prediction		Yes	No
484	>FJ882951.1_484	UUGGCGACAUUUCAGGCAUUAACGCUUCUGUCGUCAACAUUCAAAAAGAAAUUGACCGCCUCAAUGAGGUCGCUAA	24926-25001	-22.1	MiRNA_FJ882951.1_484	Multibranch - No prediction		Yes	No
485	>FJ882951.1_485	AAUUGGGAAAAUAUGAGCAAUAUAUUAAAUGGCCUUGGUAUGUUUGGCUCGGCUUCAUUGCUGGACUAAUUGCCAUCGUCAUGGUUACAAUCUUGCUUUGUUGCAUGACUAGUU	25034-25147	-38.8	MiRNA_FJ882951.1_485	AAAUGGCCUUGGUAUGUUUGGC	ACUAAUUGCCAUCGUCAUGGUU	No	Yes
486	>FJ882951.1_486	CUUGCUUUGUUGCAUGACUAGUUGUUGCAGUUGCCUCAAGGGUGCAUGCUCUUGUGGUUCUUGCUGCAAGUUUGAUGAGGAUGACUCUGAGCCAG	25125-25219	-32.8	MiRNA_FJ882951.1_486	UAGUUGUUGCAGUUGCCUCAAGG	UGUGGUUCUUGCUGCAAGUUU	No	Yes
488	>FJ882951.1_488	ACUCUGAGCCAGUUCUCAAGGGUGUCAAAUUACAUUACACAUAAACGAACUUAUGGAUUUGUUUAUGAGAUUUUUUACUCUUGGAUCAAUUACUGCACAGCCAGU	25208-25312	-30.4	MiRNA_FJ882951.1_488	AGGGUGUCAAAUUACAUUACAC	UUUAUGAGAUUUUUUACUCUUG	No	Yes
489	>FJ882951.1_489	GCCAGUAAAAAUUGACAAUGCUUCUCCUGCAAGUACUGUUCAUGCUACAGCAACGAUACCGCUACAAGCCUCACUCCCUUUCGGAUGGCUUGUUAUUGGC	25307-25406	-27.2	MiRNA_FJ882951.1_489	Multibranch - No prediction		Yes	No
490	>FJ882951.1_490	CAAUGCUUCUCCUGCAAGUACUGUUCAUGCUACAGCAACGAUACCGCUACAAGCCUCACUCCCUUUCGGAUGGCUUGUUAUUGGCGUUG	25322-25410	-26.2	MiRNA_FJ882951.1_490	Multibranch - No prediction		Yes	No
491	>FJ882951.1_491	GCAACGAUACCGCUACAAGCCUCACUCCCUUUCGGAUGGCUUGUUAUUGGCGUUGC	25356-25411	-23.5	MiRNA_FJ882951.1_491	CAACGAUACCGCUACAAGCCUC	UGGCUUGUUAUUGGCGUUGC	No	Yes
494	>FJ882951.1_494	GCUUCCAGUUCAUUUGCAAUUUACUGCUGCUAUUUGUUACCAUCUAUUCACAUCUUUUGCUUGUCGCUGCAGGUAUGGAGGC	25486-25567	-24.7	MiRNA_FJ882951.1_494	UACUGCUGCUAUUUGUUACC	UUUGCUUGUCGCUGCAGGUAUG	No	Yes
495	>FJ882951.1_495	AUCUAUUCACAUCUUUUGCUUGUCGCUGCAGGUAUGGAGGCGCAAUUUUUGUACCUCUAUGCCUUGAUAUAUUUUCUACAAUGCAUCAACGCAUGUAGAAUUAU	25527-25630	-29.1	MiRNA_FJ882951.1_495	Multibranch - No prediction		Yes	No
496	>FJ882951.1_496	UGCAGGUAUGGAGGCGCAAUUUUUGUACCUCUAUGCCUUGAUAUAUUUUCUACAAUGCAUCAACGCAUGUAGAAUUAUUAUGAGAUGUUGGCUUUGUUGGAAGUGCA	25553-25659	-31.9	MiRNA_FJ882951.1_496	Multibranch - No prediction		Yes	No
497	>FJ882951.1_497	UUUGUACCUCUAUGCCUUGAUAUAUUUUCUACAAUGCAUCAACGCAUGUAGAAUUAUUAUGAGAUGUUGGCUUUGUUGGAAGUGCAAA	25574-25661	-26.4	MiRNA_FJ882951.1_497	AUGCCUUGAUAUAUUUUCUACA	UAGAAUUAUUAUGAGAUGUUGG	No	Yes
498	>FJ882951.1_498	GAUGCCAACUACUUUGUUUGCUGGCACACACAUAACUAUGACUACUGUAUACCAUAUAACAGUGUCACAGAUACAAUUGUCGUUACUGAAGGUGACGGCAUU	25683-25784	-30.2	MiRNA_FJ882951.1_498	Multibranch - No prediction		Yes	No
500	>FJ882951.1_500	GGUGACGGCAUUUCAACACCAAAACUCAAAGAAGACUACCAAAUUGGUGGUUAUUCUGAGGAUAGGCACUCAGGUGUUAAAGACUAUGUCGUUGUACAUGGCUAUUUCACC	25773-25883	-28.3	MiRNA_FJ882951.1_500	CAACACCAAAACUCAAAGAAGAC	UGAGGAUAGGCACUCAGGUGUUA	No	Yes
503	>FJ882951.1_503	UACAUUCUUCAUCUUUAACAAGCUUGUUAAAGACCCACCGAAUGUGCAAAUACACACAAUCGACGGCUCUUCAGGAGUUGCUAAUCCAGCAAUGGAUCCAAUUUA	25943-26047	-28.2	MiRNA_FJ882951.1_503	Multibranch - No prediction		Yes	No
504	>FJ882951.1_504	UACAUUCUUCAUCUUUAACAAGCUUGUUAAAGACCCACCGAAUGUGCAAAUACACACAAUCGACGGCUCUUCAGGAGUUGCUAAUCCAGCAAUGGAUCCAAUUUAUGAUGUG	25943-26054	-20.7	MiRNA_FJ882951.1_504	Multibranch - No prediction		Yes	No
505	>FJ882951.1_505	UCGACGGCUCUUCAGGAGUUGCUAAUCCAGCAAUGGAUCCAAUUUAUGAUGUGCCGACGA	26002-26061	-27.4	MiRNA_FJ882951.1_505	UCGACGGCUCUUCAGGAGUUGC	UCCAAUUUAUGAUGUGCCGACG	No	Yes
506	>FJ882951.1_506	GCUAAUCCAGCAAUGGAUCCAAUUUAUGAUGUGCCGACGACGACUACUAGCGUGCCUUUGUAAGCACAAGAAAGUGAGUACGAACUUAUGUACUCAUUCGU	26022-26122	-27.6	MiRNA_FJ882951.1_506	Multibranch - No prediction		Yes	No
507	>FJ882951.1_507	GUGCCUUUGUAAGCACAAGAAAGUGAGUACGAACUUAUGUACUCAUUCGUUUCGGAAGAAACAGGUACGUUAAUAGUUAAUAGCGUACUUCUUUUUCUUGCUUUCGUGGUAU	26073-26184	-38	MiRNA_FJ882951.1_507	Multibranch - No prediction		Yes	No
508	>FJ882951.1_508	AGUGAGUACGAACUUAUGUACUCAUUCGUUUCGGAAGAAACAGGUACGUUAAUAGUUAAUAGCGUACUUCUUUUUCUUGCUUUCGUGGUAUUCUUGCUAGUCACACU	26094-26200	-30.8	MiRNA_FJ882951.1_508	Multibranch - No prediction		Yes	No
509	>FJ882951.1_509	GGUACGUUAAUAGUUAAUAGCGUACUUCUUUUUCUUGCUUUCGUGGUAUUCUUGCUAGUCACACUAGCCAUCCUUACUGCGCUUCGAUUGUGUGCGUACU	26136-26235	-29.3	MiRNA_FJ882951.1_509	UACGUUAAUAGUUAAUAGCGUA	UGCGCUUCGAUUGUGUGCGUAC	No	Yes
510	>FJ882951.1_510	UGCUAGUCACACUAGCCAUCCUUACUGCGCUUCGAUUGUGUGCGUACUGCUGCAAUAUUGUUAACGUGAGUUUAGUAAAACCAACGGUUUACGUCUACUCGCG	26188-26290	-26.9	MiRNA_FJ882951.1_510	Multibranch - No prediction		Yes	No
514	>FJ882951.1_514	GGCAGACAACGGUACUAUUACCGUUGAGAAGCUUAAACAACUCCUGGAACAAUGGAACCUAGUAAUAGGUUUCCUAUUCCUAGCCUGGAUUAUGUUACUACAAUUUGCC	26392-26500	-28.5	MiRNA_FJ882951.1_514	Multibranch - No prediction		Yes	No
515	>FJ882951.1_515	CCGUUGAGAAGCUUAAACAACUCCUGGAACAAUGGAACCUAGUAAUAGGUUUCCUAUUCCUAGCCUGGAUUAUGUUACUACAAUUUGCCUAUUCUAAUCGG	26412-26512	-23.4	MiRNA_FJ882951.1_515	UAAACAACUCCUGGAACAAUGG	UUCCUAGCCUGGAUUAUGUUA	No	Yes
517	>FJ882951.1_517	AGCCUGGAUUAUGUUACUACAAUUUGCCUAUUCUAAUCGGAACAGGUUUUUGUACAUAAUAAAGCUUGUUUUCCUCUGGCUCUUGUGGCCAGUAACACUUGCU	26473-26575	-28.5	MiRNA_FJ882951.1_517	Multibranch - No prediction		Yes	No
519	>FJ882951.1_519	UUGGGUGACUGGCGGGAUUGCGAUUGCAAUGGCUUGUAUUGUAGGCUUGAUGUGGCUUAGCUACUUCGUUGCUUCCUUCAGGCUGUUUGCUCGUACCCGCUCAAUGUGGUCAUUCAA	26608-26724	-48.2	MiRNA_FJ882951.1_519	UGGCUUGUAUUGUAGGCUUGA	UUGCUUCCUUCAGGCUGUUUGC	No	Yes
521	>FJ882951.1_521	UGGUCAUUCAACCCAGAAACAAACAUUCUUCUCAAUGUGCCUCUCCGGGGGACAAUUGUGACCA	26714-26777	-20.6	MiRNA_FJ882951.1_521	UGGUCAUUCAACCCAGAAACAA	UCUCCGGGGGACAAUUGUGACC	No	Yes
522	>FJ882951.1_522	GUGACCAGACCGCUCAUGGAAAGUGAACUUGUCAUUGGUGCUGUGAUCAUUCGUGGUCACUUGCGAAUGGCCGGACACCCCCUAGGGCGCUGUGACAU	26771-26868	-37.7	MiRNA_FJ882951.1_522	AGUGAACUUGUCAUUGGUGCUGU	ACUUGCGAAUGGCCGGACACCC	No	Yes
523	>FJ882951.1_523	CCUAGGGCGCUGUGACAUUAAGGACCUGCCAAAAGAGAUCACUGUGGCUACAUCACGAACGCUUUCUUAUUACAAAUUAGGAGCGUCGCAGCGUGUAGG	26851-26949	-38.1	MiRNA_FJ882951.1_523	UUAAGGACCUGCCAAAAGAGAU	CUUUCUUAUUACAAAUUAGGAG	No	Yes
526	>FJ882951.1_526	AUACAGACCACGCCGGUAGCAACGACAAUAUUGCUUUGCUAGUACAGUAAGUGACAACAGAUGUUUCAUCUUGUUGACUUCCAGGUUACAAU	27006-27097	-20.4	MiRNA_FJ882951.1_526	AACGACAAUAUUGCUUUGCU	CAGAUGUUUCAUCUUGUUGACU	No	Yes
527	>FJ882951.1_527	UGUUUCAUCUUGUUGACUUCCAGGUUACAAUAGCAGAGAUAUUGAUUAUCAUUAUGAGGACUUUCAGGAUUGCUAUUUGGAAUCUUGACGUUAUAAUAAGUUCAAUAGUGAGACA	27067-27181	-21.5	MiRNA_FJ882951.1_527	UCCAGGUUACAAUAGCAGAGAU	AUUGCUAUUUGGAAUCUUGACG	No	Yes
528	>FJ882951.1_528	UAAGAAGAAUUAUUCGGAGUUAGAUGAUGAAGAACCUAUGGAGUUAGAUUAUCCAUAAAACGAACAUGAAAAUUAUUCUCUUCCUGACAUUGAUUGUAUUUACAUCUUG	27200-27308	-23.2	MiRNA_FJ882951.1_528	CGGAGUUAGAUGAUGAAGAACC	UUCUCUUCCUGACAUUGAUUGU	No	Yes
530	>FJ882951.1_530	CAGGAGUGUGUUAGAGGUACGACUGUACUACUAAAAGAACCUUGCCCAUCAGGAACAUACGAGGGCAAUUCACCAUUUCACCCUCUUG	27325-27412	-26.9	MiRNA_FJ882951.1_530	Multibranch - No prediction		Yes	No
532	>FJ882951.1_532	UUGCUUUUGCUUGUGCUGACGGUACUCGACAUACCUAUCAGCUGCGUGCAAGAUCAG	27452-27508	-23.5	MiRNA_FJ882951.1_532	UUGCUUUUGCUUGUGCUGACGG	UAUCAGCUGCGUGCAAGAUCAG	No	Yes
535	>FJ882951.1_535	UAAUACUUUGCUUCACCAUUAAGAGAAAGACAGAAUGAAUGAGCUCACUUUAAUUGACUUCUAUUUGUGCUUUUUAGCCUUUCUGCUAUUCCUUGUUUUAAUAAUGCUUAUUA	27596-27708	-22	MiRNA_FJ882951.1_535	AAGACAGAAUGAAUGAGCUCA	CUUUUUAGCCUUUCUGCUAUUC	No	Yes
536	>FJ882951.1_536	GAAAGACAGAAUGAAUGAGCUCACUUUAAUUGACUUCUAUUUGUGCUUUUUAGCCUUUCUGCUAUUCCUUGUUUUAAUAAUGCUUAUUAUAUUUUGGUUUUC	27620-27721	-20.6	MiRNA_FJ882951.1_536	UGAGCUCACUUUAAUUGACUUC	UCCUUGUUUUAAUAAUGCUUAU	No	Yes
543	>FJ882951.1_543	UGUUUUGACUUGUAUUUCUCUAUGCAGUUGCAUAUGCACUGUAGUACAGCGCUGUGCAUCUAAUAAACCUCAUGUGCUUGAAGAUCCUUGUAAGGUACAACA	27785-27886	-22.9	MiRNA_FJ882951.1_543	Multibranch - No prediction		Yes	No
544	>FJ882951.1_544	AGUACAGCGCUGUGCAUCUAAUAAACCUCAUGUGCUUGAAGAUCCUUGUAAGGUACAACACUAGGGGUAAUACUUAUAGCACUGCUUGGCUUUGUGCU	27827-27924	-21.2	MiRNA_FJ882951.1_544	AGUACAGCGCUGUGCAUCUAAU	UAGCACUGCUUGGCUUUGUGCU	No	Yes
546	>FJ882951.1_546	CACUAUGGUUCAAACAUGCACACCUAAUGUUACUAUCAACUGUCAAGAUCCAGCUGGUGGUGCGCUUAUAGCUAGGUGUUGGUACCUUCAUGAAGGUCCCCAAACUG	27957-28063	-31.3	MiRNA_FJ882951.1_546	Multibranch - No prediction		Yes	No
547	>FJ882951.1_547	UUGGUACCUUCAUGAAGGUCCCCAAACUGCUGCAUUUUAGAGACGUACUUGUUGUUUUAAAUAAACGAACAAAUUAAAAUGUCUGAUAAUGGACCCCAAUCAA	28035-28137	-20.6	MiRNA_FJ882951.1_547	Multibranch - No prediction		Yes	No
548	>FJ882951.1_548	UUAAAAUGUCUGAUAAUGGACCCCAAUCAAACCAACGUAGUGCCCCCCGCAUUACAUUUGGUGGACCCACAGAUUCAACUGACAAUAA	28108-28195	-24.6	MiRNA_FJ882951.1_548	AAUGGACCCCAAUCAAACCAACGU	AUUACAUUUGGUGGACCCACAG	No	Yes
549	>FJ882951.1_549	UGCCCCCCGCAUUACAUUUGGUGGACCCACAGAUUCAACUGACAAUAACCAGAAUGGAGGACGCAAUGGGGCA	28148-28220	-24.3	MiRNA_FJ882951.1_549	CGCAUUACAUUUGGUGGACCCA	AAUAACCAGAAUGGAGGACGCA	No	Yes
550	>FJ882951.1_550	CUGACAAUAACCAGAAUGGAGGACGCAAUGGGGCAAGGCCAAAACAGCGCCGACCCCAAGGUUUACCCAAUAAUACUGCGUCUUGGUUCACAGCUCUCACUCAG	28186-28289	-29.3	MiRNA_FJ882951.1_550	AAUGGAGGACGCAAUGGGGCA	CCCAAUAAUACUGCGUCUUGGU	No	Yes
553	>FJ882951.1_553	GAACUUAGAUUCCCUCGAGGCCAGGGCGUUCCAAUCAACACCAAUAGUGGUCCAGAUGACCAAAUUGGCUACUACCGAAGAGCUACCCGACGAGUUC	28302-28398	-26.3	MiRNA_FJ882951.1_553	GGGCGUUCCAAUCAACACCAAU	UUGGCUACUACCGAAGAGCUAC	No	Yes
554	>FJ882951.1_554	CGAGGCCAGGGCGUUCCAAUCAACACCAAUAGUGGUCCAGAUGACCAAAUUGGCUACUACCGAAGAGCUACCCGACGAGUUCG	28317-28399	-22.4	MiRNA_FJ882951.1_554	CGAGGCCAGGGCGUUCCAAUCAA	GAAGAGCUACCCGACGAGUUCG	No	Yes
555	>FJ882951.1_555	GGCUACUACCGAAGAGCUACCCGACGAGUUCGUGGUGGUGACGGCAAAAUGAAAGAGCUCAGCCCCAGAUGGUACUUCUAUUACCUAGGAACUGGCC	28368-28464	-25.5	MiRNA_FJ882951.1_555	Multibranch - No prediction		Yes	No
556	>FJ882951.1_556	CUCAGCCCCAGAUGGUACUUCUAUUACCUAGGAACUGGCCCAGAAGCUUCACUUCCCUACGGCGCUAACAAAGAAGGCAUCGUAUGGGUUGCAACUGAG	28425-28523	-29.4	MiRNA_FJ882951.1_556	UGGUACUUCUAUUACCUAGGAA	UACGGCGCUAACAAAGAAGGCAU	No	Yes
558	>FJ882951.1_558	GGCAUCGUAUGGGUUGCAACUGAGGGAGCCUUGAAUACACCCAAAGACCACAUUGGCACCCGCAAUCCUAAUAACAAUGCU	28500-28580	-23.8	MiRNA_FJ882951.1_558	UUGCAACUGAGGGAGCCUUGA	AUUGGCACCCGCAAUCCUAAUA	No	Yes
559	>FJ882951.1_559	AUUGCCAAAAGGCUUCUACGCAGAGGGAAGCAGAGGCGGCAGUCAAGCCUCUUCUCGCUCCUCAUCACGUAGUCGCGGUAAU	28613-28694	-31.8	MiRNA_FJ882951.1_559	UUCUACGCAGAGGGAAGCAGAGG	UCUCGCUCCUCAUCACGUAGU	No	Yes
560	>FJ882951.1_560	UCAUCACGUAGUCGCGGUAAUUCAAGAAAUUCAACUCCUGGCAGCAGUAGGGGAAAUUCUCCUGCUCGAAUGGCUAGCGGAGGUGGUGA	28674-28762	-28.6	MiRNA_FJ882951.1_560	UCGCGGUAAUUCAAGAAAUUCA	GGAAAUUCUCCUGCUCGAAUGG	No	Yes
562	>FJ882951.1_562	UGGCUAGCGGAGGUGGUGAAACUGCCCUCGCGCUAUUGCUGCUAGACAGAUUGAACCAGCUUGAGAGCAAAGUUUCUGGUAAAGGCCAACAACAACAAGGCCA	28744-28846	-24.2	MiRNA_FJ882951.1_562	Multibranch - No prediction		Yes	No
563	>FJ882951.1_563	GCUUGAGAGCAAAGUUUCUGGUAAAGGCCAACAACAACAAGGCCAAACUGUCACUAAGAAAUCUGCUGCUGAGGC	28802-28876	-23.6	MiRNA_FJ882951.1_563	AGCAAAGUUUCUGGUAAAGGC	UGUCACUAAGAAAUCUGCUGC	No	Yes
566	>FJ882951.1_566	UCCAGAACAAACCCAAGGAAAUUUCGGGGACCAAGACCUAAUCAGACAAGGAACUGAUUACAAACAUUGGCCGCAAAUUGCACAAUUUGCUCCAAGUGCCUCUGCAUUCUUUGGA	28949-29063	-23	MiRNA_FJ882951.1_566	Multibranch - No prediction		Yes	No
567	>FJ882951.1_567	CUAAUCAGACAAGGAACUGAUUACAAACAUUGGCCGCAAAUUGCACAAUUUGCUCCAAGUGCCUCUGCAUUCUUUGGAAUGUCACGCAUUGG	28986-29077	-20.9	MiRNA_FJ882951.1_567	Multibranch - No prediction		Yes	No
569	>FJ882951.1_569	GCUCCAAGUGCCUCUGCAUUCUUUGGAAUGUCACGCAUUGGCAUGGAAGUCACACCUUCGGGAACAUGGCUGACUUAUCAUGGAGC	29037-29122	-24.5	MiRNA_FJ882951.1_569	Multibranch - No prediction		Yes	No
570	>FJ882951.1_570	UGUCACGCAUUGGCAUGGAAGUCACACCUUCGGGAACAUGGCUGACUUAUCAUGGAGCCAUUAAAUUGGAUGACA	29065-29139	-23.6	MiRNA_FJ882951.1_570	ACGCAUUGGCAUGGAAGUCACA	CUGACUUAUCAUGGAGCCAUUA	No	Yes
571	>FJ882951.1_571	GAAAAAGACUGAUGAAGCUCAGCCUUUGCCGCAGAGACAAAAGAAGCAGCCCACUGUGACUCUUCUUCCUGCGGCUGACAUGGAUGAUUUCUCCAGACAACUUC	29234-29337	-33.2	MiRNA_FJ882951.1_571	AGCCUUUGCCGCAGAGACAA	UCCUGCGGCUGACAUGGAUG	No	Yes
573	>FJ882951.1_573	AAAAUUCCAUGAGUGGAGCUUCUGCUGAUUCAACUCAGGCAUAAACACUCAUGAUGACCACACAAGGCAGAUGGGCUAUGUAAACGUUUU	29338-29427	-21	MiRNA_FJ882951.1_573	Multibranch - No prediction		Yes	No
574	>FJ882951.1_574	UCAUGAUGACCACACAAGGCAGAUGGGCUAUGUAAACGUUUUCGCAAUUCCGUUUACGAUACAUAGUCUACUCUUGUGCAGAAUGA	29386-29471	-32	MiRNA_FJ882951.1_574	CAAGGCAGAUGGGCUAUGUAAACG	AUACAUAGUCUACUCUUGUGC	No	Yes
576	>FJ882951.1_576	GUAGGUUUAGUUAACUUUAAUCUCACAUAGCAAUCUUUAAUCAAUGUGUAACAUUAGGGAGGACUUGAAAGAGCCACCAC	29495-29574	-20.2	MiRNA_FJ882951.1_576	UAGUUAACUUUAAUCUCACAUAG	AAUGUGUAACAUUAGGGAGGA	No	Yes

## Sheet: Putative miRNA
			mirEval			Sequence-Structure Motif Base Webserver
SN	Sequence ID	Sequence	Sequence ID			Sequence ID	Prediction	MFE	Result	Putative Pre-miRNA
1	>FJ882951.1_1	UUUAAAAUCUGUGUAGCUGUCGCUCGGCUGCAUGCCUAGUGCACCUACGCAGUAUAAA	>FJ882951.1_1	-23.3	Yes	>FJ882951.1_1	No Prediction		No	Yes
3	>FJ882951.1_7	GCCUUGUUCUUGGUGUCAACGAGAAAACACACGUCCAACUCAGUUUGCCUGUCCUUCAGGUUAGAGACGUGCUAGUGCGUGGCUUCGGGGACUCUGUGGAAGAGGC	>FJ882951.1_7	-22.5	Yes	>FJ882951.1_7	No Prediction		No	Yes
5	>FJ882951.1_8	GUCCUUCAGGUUAGAGACGUGCUAGUGCGUGGCUUCGGGGACUCUGUGGAAGAGGCCCUAUCGGAGGCACGUGAACACCUCAAAAAUGGC	>FJ882951.1_8	-29.1	Yes	>FJ882951.1_8	No Prediction		No	Yes	Hairpins	247
7	>FJ882951.1_9	GAGGCACGUGAACACCUCAAAAAUGGCACUUGUGGUCUAGUAGAGCUGGAAAAAGGCGUACUGCCCCAGCUUGAACAGCCCUAUGUGUUCAUUAAACGUUCUGAUGCCUU	>FJ882951.1_9	-23.6	Yes	>FJ882951.1_9	No Prediction		No	Yes	Putative Pre-miRNA	107
9	>FJ882951.1_10	UAUCGGAGGCACGUGAACACCUCAAAAAUGGCACUUGUGGUCUAGUAGAGCUGGAAAAAGGCGUACUGCCCCAGCUUGAACAGCCCUAUGUGUUCAUUAAACGUUCUGAUG	>FJ882951.1_10	-23.6	Yes	>FJ882951.1_10	No Prediction		No	Yes
11	>FJ882951.1_11	CUUGUGGUCUAGUAGAGCUGGAAAAAGGCGUACUGCCCCAGCUUGAACAGCCCUAUGUGUUCAUUAAACGUUCUGAUGCCUUAAGCACCAAUCACGGCCACAAG	>FJ882951.1_11	None mir-like hairpin predictions	No	>FJ882951.1_11	>FJ882951.1_10_18_107_20 cand1	-23.4	Yes	Yes
13	>FJ882951.1_12	CCAGCUUGAACAGCCCUAUGUGUUCAUUAAACGUUCUGAUGCCUUAAGCACCAAUCACGGCCACAAGGUCGUUGAGCUGG	>FJ882951.1_12	None mir-like hairpin predictions	No	>FJ882951.1_12	No Prediction		No	No
15	>FJ882951.1_14	UACGGUCGUAGCGGUAUAACACUGGGAGUACUCGUGCCACAUGUGGGCGAAACCCCAAUUGCAUACCGCAAUGUUCUUCUUCGUA	>FJ882951.1_14	-24.2	Yes	>FJ882951.1_14	No Prediction		No	Yes
17	>FJ882951.1_15	UCGUGCCACAUGUGGGCGAAACCCCAAUUGCAUACCGCAAUGUUCUUCUUCGUAAGAACGGUAAUAAGGGAGCCGGUGGUCAUAGCUAUGGCAUCGAUCUAAAGUCUUAUGA	>FJ882951.1_15	None mir-like hairpin predictions	No	>FJ882951.1_15	No Prediction		No	No
19	>FJ882951.1_17	AGGGAGCCGGUGGUCAUAGCUAUGGCAUCGAUCUAAAGUCUUAUGACUUAGGUGACGAGCUUGGCACUGAUCCCAUUGAAGAUUAUGAACAAAACUGGAACACU	>FJ882951.1_17	-25.5	Yes	>FJ882951.1_17	>FJ882951.1_17_0_78_9 cand2	-27.8	Yes	Yes
21	>FJ882951.1_19	GCAUGGCAGUGGUGCACUCCGUGAACUCACUCGUGAGCUCAAUGGAGGUGCAGUCACUCGCUAUGU	>FJ882951.1_19	-32.7	Yes	>FJ882951.1_19	>FJ882951.1_19_2_66_4 cand3	-30.3	Yes	Yes
23	>FJ882951.1_20	CUCGUGAGCUCAAUGGAGGUGCAGUCACUCGCUAUGUCGACAACAAUUUCUGUGGCCCAGAUGGGUACCCUCUUGAUUGCAUCAAAG	>FJ882951.1_20	-18.8	No	>FJ882951.1_20	No Prediction		No	No
25	>FJ882951.1_22	CGCGCGGGCAAGUCAAUGUGCACUCUUUCCGAACAACUUGAUUACAUCGAGUCGAAGAGAGGUGUCUACUGCUGCCGUG	>FJ882951.1_22	-21.9	Yes	>FJ882951.1_22	No Prediction		No	Yes
27	>FJ882951.1_29	AGUGUAACAAUAUGCACUUGUCUACCUUGAUGAAAUGUAAUCAUUGCGAUGAAGUUUCAUGGCAGACGUGCGACUUUCUGAAAGCCACUUGUGAACAUUGUGGCACU	>FJ882951.1_29	None mir-like hairpin predictions	No	>FJ882951.1_29	No Prediction		No	No
29	>FJ882951.1_30	UGGCACUGAAAAUUUAGUUAUUGAAGGACCUACUACAUGUGGGUACCUACCUACUAAUGCUGUAGUGAAAAUGCCA	>FJ882951.1_30	None mir-like hairpin predictions	No	>FJ882951.1_30	No Prediction		No	No
31	>FJ882951.1_32	AGCAUAGUGUUGCAGAUUAUCACAACCACUCAAACAUUGAAACUCGACUCCGCAAGGGAGGUAGGACUAGAUGUUUUGGAGGCUGUGUGUUUGCCUAUGUU	>FJ882951.1_32	-26	Yes	>FJ882951.1_32	No Prediction		No	Yes
33	>FJ882951.1_38	GGCUGCUGGUGUUAUCAGAUCAAUUUUUGCGCGCACACUUGAUGCAGCAAACCACUCAAUUCCUGAUUUGCAAAGAGCAGCU	>FJ882951.1_38	-21.3	Yes	>FJ882951.1_38	No Prediction		No	Yes
35	>FJ882951.1_40	GCUGUCACCAUACUUGAUGGUAUUUCUGAACAGUCAUUACGUCUUGUCGACGCCAUGGUUUAUACUUCAGACCUGCUCACCAACAGU	>FJ882951.1_40	None mir-like hairpin predictions	No	>FJ882951.1_40	No Prediction		No	No
37	>FJ882951.1_44	GGUGGUCUUGUACAACAGACUUCUCAGUGGUUGUCUAAUCUUUUGGGCACUACUGUUGAAAAACUCAGGCCUAUCU	>FJ882951.1_44	-20.4	Yes	>FJ882951.1_44	>FJ882951.1_44_1_76_8 cand4	-20.5	Yes	Yes
39	>FJ882951.1_50	GUCAAGGGUCAAAUACAGGUUGCUUCAGAUAACAUCAAGGAUUGUGUAAAAUGCUUCAUUGAUGUUGUUAACAAGGCACUCGAAAUGUGCAUUGAUCAAGUCAC	>FJ882951.1_50	None mir-like hairpin predictions	No	>FJ882951.1_50	No Prediction		No	No
41	>FJ882951.1_52	GUGCAUUGAUCAAGUCACUAUCGCUGGCGCAAAGUUGCGAUCACUCAACUUAUGUGAAGUCUUCAUCGCUCAAAGCAAGGGACUUUACCGUCAGUGUAU	>FJ882951.1_52	-25.6	Yes	>FJ882951.1_52	No Prediction		No	Yes
43	>FJ882951.1_53	AUCGCUCAAAGCAAGGGACUUUACCGUCAGUGUAUACGUGGCAAGGAGCAGCUGCAACUACUCAUGCCUCUUAAGGCACCAAAAGAAGUAACCUUUCUUGAAGGUGAU	>FJ882951.1_53	None mir-like hairpin predictions	No	>FJ882951.1_53	No Prediction		No	No
45	>FJ882951.1_54	GCCUCUUAAGGCACCAAAAGAAGUAACCUUUCUUGAAGGUGAUUCACAUGACACAGUACUUACCUCUGAGGAGGU	>FJ882951.1_54	None mir-like hairpin predictions	No	>FJ882951.1_54	No Prediction		No	No
47	>FJ882951.1_55	UCUCAAGAACGGUGAACUCGAAGCACUCGAGACGCCCGUUGAUAGCUUCACAAAUGGAGCUAUCGUUGGCACACCAGUCUGUGUAAAUGGCCUCAUGCUCUUAGAGA	>FJ882951.1_55	None mir-like hairpin predictions	No	>FJ882951.1_55	No Prediction		No	No
49	>FJ882951.1_58	GGCUACAAACAAUGUCUUUCGCUUAAAAGGGGGUGCACCAAUUAAAGGUGUAACCUUUGGAGAAGAUACUGUUUGGGAAGUU	>FJ882951.1_58	-24.9	Yes	>FJ882951.1_58	>FJ882951.1_58_0_82_12 cand5	-27.3	Yes	Yes
51	>FJ882951.1_60	GUUGACAAAGUGCUUAAUGAAAAGUGCUCUGUCUACACUGUUGAAUCCGGUACCGAAGUUACUGAGUUUGCAUGUGUUGUAGCAGAGGCUGUUGUGAAGACUUUACAAC	>FJ882951.1_60	-18.7	No	>FJ882951.1_60	>FJ882951.1_60_6_109_20 cand6	-24.7	Yes	Yes
53	>FJ882951.1_62	UGGAGUGUAGCUACAUUCUACUUAUUUGAUGAUGCUGGUGAAGAAAACUUUUCAUCACGUAUGUAUUGUUCCUUUUACCCUCCA	>FJ882951.1_62	-18.8	No	>FJ882951.1_62	No Prediction		No	No
55	>FJ882951.1_63	GGUGAAGAAAACUUUUCAUCACGUAUGUAUUGUUCCUUUUACCCUCCAGAUGAGGAAGAAGAGGACGAUGCAGAGUGUGAGGAAGAAGAAAUUGAUGAAACC	>FJ882951.1_63	-28.1	Yes	>FJ882951.1_63	No Prediction		No	Yes
57	>FJ882951.1_64	GAGGACGAUGCAGAGUGUGAGGAAGAAGAAAUUGAUGAAACCUGUGAACAUGAGUACGGUACAGAGGAUGAUUAUCAAGGUCUCCCUCUGGAAUUUGGUGCCUC	>FJ882951.1_64	-19.5	No	>FJ882951.1_64	No Prediction		No	No
59	>FJ882951.1_65	CGGUACAGAGGAUGAUUAUCAAGGUCUCCCUCUGGAAUUUGGUGCCUCAGCUGAAACAGUUCGAGUUGAGGAAGAAGAAGAGGAAGACUGGCUGGAUGAUACUACUG	>FJ882951.1_65	-26.7	Yes	>FJ882951.1_65	No Prediction		No	Yes
61	>FJ882951.1_66	AGCAAUCAGAGAUUGAGCCAGAACCAGAACCUACACCUGAAGAACCAGUUAAUCAGUUUACUGGUUAUUUAAAACUUACUGACAAUGUU	>FJ882951.1_66	None mir-like hairpin predictions	No	>FJ882951.1_66	No Prediction		No	No
63	>FJ882951.1_68	GCACAAAGUGCUAAUCCUAUGGUGAUUGUAAAUGCUGCUAACAUACACCUGAAACAUGGUGGUGGUGUAGCAGGUGCACUCAACAAGGCAACCAAUGGUGC	>FJ882951.1_68	-27.4	Yes	>FJ882951.1_68	No Prediction		No	Yes
65	>FJ882951.1_69	CAUGCAAAAGGAGAGUGAUGAUUACAUUAAGCUAAAUGGCCCUCUUACAGUAGGAGGGUCUUGUUUGCUUUCUGGACAUAAUCUUGCUAAGAAGUGUCUGCAUG	>FJ882951.1_69	-24	Yes	>FJ882951.1_69	No Prediction		No	Yes
67	>FJ882951.1_71	CAUAAUCUUGCUAAGAAGUGUCUGCAUGUUGUUGGACCUAACCUAAAUGCAGGUGAGGACAUCCAGCUUCUUAAGGCAGCAUAUG	>FJ882951.1_71	None mir-like hairpin predictions	No	>FJ882951.1_71	No Prediction		No	No
69	>FJ882951.1_72	GGACAUCUUACUUGCACCAUUGUUGUCAGCAGGCAUAUUUGGUGCUAAACCACUUCAGUCUUUACAAGUGUGCGUGCAGACGGUUC	>FJ882951.1_72	-20.8	Yes	>FJ882951.1_72	No Prediction		No	Yes
71	>FJ882951.1_74	GUACACAGGUUUAUAUUGCAGUCAAUGGCAAAGCUCUUUAUGAGCAGGUUGUCAUGGAUUAUCUUGAUAACCUGAAGC	>FJ882951.1_74	-23	Yes	>FJ882951.1_74	No Prediction		No	Yes
73	>FJ882951.1_75	GCAAAGCUCUUUAUGAGCAGGUUGUCAUGGAUUAUCUUGAUAACCUGAAGCCUAGAGUGGAAGC	>FJ882951.1_75	-20.3	Yes	>FJ882951.1_75	No Prediction		No	Yes
75	>FJ882951.1_77	UAAGGCCUGCAUUGAUGAGGUUACCACAACACUGGAAGAAACUAAGUUUCUUACCAAUAAGUUACUCUUGUUUGCUGAUAUCAAUGGUAAGCUUUA	>FJ882951.1_77	None mir-like hairpin predictions	No	>FJ882951.1_77	No Prediction		No	No
77	>FJ882951.1_78	GGAAGAAACUAAGUUUCUUACCAAUAAGUUACUCUUGUUUGCUGAUAUCAAUGGUAAGCUUUACCAUGAUUCUCAGAACAUGCUUAGAGGUGAAGAUAUGUCUUUC	>FJ882951.1_78	-19.9	No	>FJ882951.1_78	No Prediction		No	No
79	>FJ882951.1_79	UUACCAUGAUUCUCAGAACAUGCUUAGAGGUGAAGAUAUGUCUUUCCUUGAGAAGGAUGCACCUUACAUGGUAGGUGAUGUUAUCACUAGUGGUGA	>FJ882951.1_79	None mir-like hairpin predictions	No	>FJ882951.1_79	>FJ882951.1_79_0_88_17 cand7	-22.23	Yes	Yes
81	>FJ882951.1_82	UGGCACUACUGAGAUGCUCUCAAGAGCUUUGAAGAAAGUGCCA	>FJ882951.1_82	-17.2	No	>FJ882951.1_82	No Prediction		No	No
83	>FJ882951.1_83	AAGAGCUUUGAAGAAAGUGCCAGUUGAUGAGUAUAUAACCACGUACCCUGGACAAGGAUGUGCUGGUUAUACACUUGAGGAAGCUAAGACUGCUCUU	>FJ882951.1_83	-22.7	Yes	>FJ882951.1_83	>FJ882951.1_83_11_97_13 cand8	-24.8	Yes	Yes
85	>FJ882951.1_89	AGCCAUAAUGGCAACCAUCCAACGUAAGUAUAAAGGAAUUAAAAUUCAAGAGGGCAUCGUUGACUAUGGUGUCCGAUUCUUCUUUUAUACUAGUAAAGAGCCUGUAGCU	>FJ882951.1_89	None mir-like hairpin predictions	No	>FJ882951.1_89	No Prediction		No	No
87	>FJ882951.1_90	UGACUAUGGUGUCCGAUUCUUCUUUUAUACUAGUAAAGAGCCUGUAGCUUCUAUUAUUACGAAGCUGAACUCUCUAAAUGAGCCGCUUGUCACAAUGCCAAUUGGUUA	>FJ882951.1_90	None mir-like hairpin predictions	No	>FJ882951.1_90	No Prediction		No	No
89	>FJ882951.1_91	AGCCUGUAGCUUCUAUUAUUACGAAGCUGAACUCUCUAAAUGAGCCGCUUGUCACAAUGCCAAUUGGUUAUGUGACACAUGGUUUUAAUCUUGAAGAGGCUGCGCGCU	>FJ882951.1_91	-24.8	Yes	>FJ882951.1_91	No Prediction		No	Yes
91	>FJ882951.1_94	AGCUCCUGCCGUAGUGUCAGUAUCAUCACCAGAUGCUGUUACUACAUAUAAUGGAUACCU	>FJ882951.1_94	None mir-like hairpin predictions	No	>FJ882951.1_94	No Prediction		No	No
93	>FJ882951.1_95	GUCAGUAUCAUCACCAGAUGCUGUUACUACAUAUAAUGGAUACCUCACUUCGUCAUCAAAGACAUCUGAGGAGCACUUUGUAGAAACAGUUUCUUUGGCUGGC	>FJ882951.1_95	-22.4	Yes	>FJ882951.1_95	>FJ882951.1_95_8_103_8 cand9	-25.9	Yes	Yes
95	>FJ882951.1_96	AGUAUCAUCACCAGAUGCUGUUACUACAUAUAAUGGAUACCUCACUUCGUCAUCAAAGACAUCUGAGGAGCACUUUGUAGAAACAGUUUCUUUGGCUGGCUCU	>FJ882951.1_96	-22.9	Yes	>FJ882951.1_96	>FJ882951.1_96_2_103_13 cand10	-25.9	Yes	Yes
97	>FJ882951.1_108	CGUGCUGGUGAUGCUGCUAACUUUUGUGCACUCAUACUCGCUUACAGUAAUAAAACUGUUGGCGAGCUUGGUGAUGUCAGAGAAACUAUGACCCAUCUUCUACAGCAUG	>FJ882951.1_108	None mir-like hairpin predictions	No	>FJ882951.1_108	No Prediction		No	No
99	>FJ882951.1_116	AGCAAGGUACAUUCUUAUGUGCGAAUGAGUACACUGGUAACUAUCAGUGUGGUCAUUACACUCAUAUAACUGCU	>FJ882951.1_116	None mir-like hairpin predictions	No	>FJ882951.1_116	No Prediction		No	No
101	>FJ882951.1_117	GGUACAUUCUUAUGUGCGAAUGAGUACACUGGUAACUAUCAGUGUGGUCAUUACACUCAUAUAACUGCU	>FJ882951.1_117	None mir-like hairpin predictions	No	>FJ882951.1_117	No Prediction		No	No
103	>FJ882951.1_118	UAUCAGUGUGGUCAUUACACUCAUAUAACUGCUAAGGAGACCCUCUAUCGUAUUGACGGAGCUCACCUUACAAAGAUGUCAGAGUACAAAGGACCAGUGACUGAUG	>FJ882951.1_118	None mir-like hairpin predictions	No	>FJ882951.1_118	>FJ882951.1_118_0_105_18 cand11	-27.6	Yes	Yes
105	>FJ882951.1_121	UGGAUGGGUAUUAUAAAAAGGAUAACGCUUACUAUACAGAGCAGCCUAUAGACCUUGUACCAACUCAACCA	>FJ882951.1_121	None mir-like hairpin predictions	No	>FJ882951.1_121	No Prediction		No	No
107	>FJ882951.1_124	AGCUAUCUGUCACAUUCUUCCCAGACUUGAAUGGCGAUGUAGUGGCUAUUGACUAUAGACACUAUUCAGCGAGUUUCAAGAAAGGUGCUAAAUUACU	>FJ882951.1_124	-20.1	Yes	>FJ882951.1_124	No Prediction		No	Yes
109	>FJ882951.1_125	CCAGACUUGAAUGGCGAUGUAGUGGCUAUUGACUAUAGACACUAUUCAGCGAGUUUCAAGAAAGGUGCUAAAUUACUGCAUAAGCCAAUUGUUUGG	>FJ882951.1_125	None mir-like hairpin predictions	No	>FJ882951.1_125	No Prediction		No	No
111	>FJ882951.1_127	AAUUGUUUGGCACAUUAACCAGGCUACAACCAAGACAACGUUCAAACCAAACACUUGGUGUUUACGUUGUCUUUGGAGUACAAAGCCAGUAGAUACUUCAAAUUCAUU	>FJ882951.1_127	-25.3	Yes	>FJ882951.1_127	No Prediction		No	Yes
113	>FJ882951.1_128	UGUUUACGUUGUCUUUGGAGUACAAAGCCAGUAGAUACUUCAAAUUCAUUUGAAGUUCUGGCAGUAGAAGACACACAAGGAAUGGACA	>FJ882951.1_128	None mir-like hairpin predictions	No	>FJ882951.1_128	>FJ882951.1_128_0_84_10 cand12	-22.4	Yes	Yes
115	>FJ882951.1_136	CAAUUGCCACUCAUGGUAUUGCUGCAAUUAAUAGUGUUCCUUGGAGUAAAAUUUUGGCUUAUGUCAAACCAUUCUUAGGACAAGCAGCAAUUACAACAUCAAAUUG	>FJ882951.1_136	-23.5	Yes	>FJ882951.1_136	No Prediction		No	Yes
117	>FJ882951.1_137	UGCCACUCAUGGUAUUGCUGCAAUUAAUAGUGUUCCUUGGAGUAAAAUUUUGGCUUAUGUCAAACCAUUCUUAGGACAAGCAGCAAUUACAACAUCAAAUUGCG	>FJ882951.1_137	-22.7	Yes	>FJ882951.1_137	No Prediction		No	Yes
119	>FJ882951.1_140	UUUUACUAAAAGUACCAAUUCUAGAAUUAGAGCUUCACUACCUACAACUAUUGCUAAAAAUAGUGUUAAGAGUGUUGCUAAAUUAUGUUUGGAUGCCGGCAUUAAUUAUGUGAAG	>FJ882951.1_140	None mir-like hairpin predictions	No	>FJ882951.1_140	No Prediction		No	No
121	>FJ882951.1_141	GCUAAAAAUAGUGUUAAGAGUGUUGCUAAAUUAUGUUUGGAUGCCGGCAUUAAUUAUGUGAAGUCACCCAAAUUUUCUAAAUUGUUCACAAUCGCUAUGUGGC	>FJ882951.1_141	None mir-like hairpin predictions	No	>FJ882951.1_141	No Prediction		No	No
123	>FJ882951.1_142	GGUGCUCCUUCUUAUUGUAAUGGCGUUAGAGAAUUGUAUCUUAAUUCGUCUAACGUUACUACUAUGGAUUUCUGUGAAGGUUCUUUUCC	>FJ882951.1_142	-22.9	Yes	>FJ882951.1_142	No Prediction		No	Yes
125	>FJ882951.1_147	AGCAAUUCUUGGCUCAUGUGGUUUAUCAUUAGUAUUGUACAAAUGGCACCCGUUUCUGCAAUGGUUAGGAUGUACAUCUUCUUUGCU	>FJ882951.1_147	-18	No	>FJ882951.1_147	No Prediction		No	No
127	>FJ882951.1_149	GCUAUGUUCAUAUCAUGGAUGGUUGCACCUCUUCGACUUGCAUGAUGUGCUAUAAGCGCAAUCGUGCCACACGCGUUGAGUGUACAACUAUUGUUAAUGGC	>FJ882951.1_149	-29.7	Yes	>FJ882951.1_149	No Prediction		No	Yes
129	>FJ882951.1_150	UAUGUUCAUAUCAUGGAUGGUUGCACCUCUUCGACUUGCAUGAUGUGCUAUAAGCGCAAUCGUGCCACACGCGUUGAGUGUACAACUAUUGUUAAUGGCAUG	>FJ882951.1_150	-29.7	Yes	>FJ882951.1_150	No Prediction		No	Yes
131	>FJ882951.1_151	CCUCUUCGACUUGCAUGAUGUGCUAUAAGCGCAAUCGUGCCACACGCGUUGAGUGUACAACUAUUGUUAAUGGCAUGAAGAGAUCUUUCUAUGUCUAUGCAAAUGGAGG	>FJ882951.1_151	None mir-like hairpin predictions	No	>FJ882951.1_151	No Prediction		No	No
133	>FJ882951.1_154	AGUACAUUCAUUAGUGAUGAAGUUGCUCGUGAUUUGUCACUCCAGUUUAAAAGACCAAUCAACCCUACUGACCAGUCAUCGUAUAUUGUUGAUAGUGUUGCU	>FJ882951.1_154	None mir-like hairpin predictions	No	>FJ882951.1_154	No Prediction		No	No
135	>FJ882951.1_155	UGAAGUUGCUCGUGAUUUGUCACUCCAGUUUAAAAGACCAAUCAACCCUACUGACCAGUCAUCGUAUAUUGUUGAUAGUGUUGCUGUGAAAAAUGGCGCGCUUCA	>FJ882951.1_155	None mir-like hairpin predictions	No	>FJ882951.1_155	No Prediction		No	No
137	>FJ882951.1_156	UGACCAGUCAUCGUAUAUUGUUGAUAGUGUUGCUGUGAAAAAUGGCGCGCUUCACCUCUACUUUGACAAGGCUGGUCA	>FJ882951.1_156	-24.5	Yes	>FJ882951.1_156	>FJ882951.1_156_0_78_10 cand13	-24.62	Yes	Yes
139	>FJ882951.1_157	UGGCGCGCUUCACCUCUACUUUGACAAGGCUGGUCAAAAGACCUAUGAGAGACAUCCGCUCUCCCAUUUUGUCAAUUUAGACAAUUUGAGAGCUAACA	>FJ882951.1_157	None mir-like hairpin predictions	No	>FJ882951.1_157	No Prediction		No	No
141	>FJ882951.1_158	GAGCUAACAACACUAAAGGUUCACUGCCUAUUAAUGUCAUAGUUUUUGAUGGCAAGUCCAAAUGCGACGAGUCUGCUUCUAAGUCUGCUU	>FJ882951.1_158	None mir-like hairpin predictions	No	>FJ882951.1_158	No Prediction		No	No
143	>FJ882951.1_162	UUGAUGCUUAUGUCGACACCUUUUCAGCAACUUUUAGUGUUCCUAUGGAAAAACUUAAGGCACUUGUUGCUACAGCUCACAGCGAGUUAGCAAAGG	>FJ882951.1_162	None mir-like hairpin predictions	No	>FJ882951.1_162	No Prediction		No	No
145	>FJ882951.1_163	UAAGGCACUUGUUGCUACAGCUCACAGCGAGUUAGCAAAGGGUGUAGCUUUAGAUGGUGUCCUUUCUACAUUCGUGUCAGCUGCCCGACAAGGUGUUGUUGAUA	>FJ882951.1_163	-23.5	Yes	>FJ882951.1_163	>FJ882951.1_163_0_102_19 cand14	-34.8	Yes	Yes
147	>FJ882951.1_164	AGGGUGUAGCUUUAGAUGGUGUCCUUUCUACAUUCGUGUCAGCUGCCCGACAAGGUGUUGUUGAUACCGAUGUUGACACAAAGGAUGUUAUUGAAUGUCUCAAACUUU	>FJ882951.1_164	-27.3	Yes	>FJ882951.1_164	No Prediction		No	Yes
149	>FJ882951.1_165	GCAAAGGGUGUAGCUUUAGAUGGUGUCCUUUCUACAUUCGUGUCAGCUGCCCGACAAGGUGUUGUUGAUACCGAUGUUGACACAAAGGAUGUUAUUGAAUGU	>FJ882951.1_165	-25.4	Yes	>FJ882951.1_165	No Prediction		No	Yes
151	>FJ882951.1_169	GUAGCAAAAAGUCACAAUGUUUCACUCAUCUGGAAUGUAAAAGACUACAUGUCUUUAUCUGAACAGCUGCGUAAACAAAUUCGUAGUGCUGC	>FJ882951.1_169	None mir-like hairpin predictions	No	>FJ882951.1_169	No Prediction		No	No
153	>FJ882951.1_172	GGUAAGAUUGUUAGUACUUGUUUUAAACUUAUGCUUAAGGCCACAUUAUUGUGCGUUCUUGCUGCAUUGGUUUGUUAUAUCGUUAUGCCAGUACAUACAUUGUCAAUC	>FJ882951.1_172	-19.4	No	>FJ882951.1_172	>FJ882951.1_172_0_99_19 cand15	-21.1	Yes	Yes
155	>FJ882951.1_175	UGGUUUAGCCAGCGUGGCGGUUCAUACAAAAAUGACAAAAGCUGCCCUGUAGUAGCUGCUAUCAUUACAAGAGAGAUUGGUUUCAUAGUGCCUGGCUUACCG	>FJ882951.1_175	None mir-like hairpin predictions	No	>FJ882951.1_175	No Prediction		No	No
157	>FJ882951.1_178	GCGUUCUUGCUGCUGAGUGUACAAUUUUUAAGGAUGCUAUGGGCAAACCUGUGCCAUAUUGUUAUGACACUAAUUUGCUAGAGGGU	>FJ882951.1_178	None mir-like hairpin predictions	No	>FJ882951.1_178	No Prediction		No	No
159	>FJ882951.1_179	CUAUUUCUUAUAGUGAGCUUCGUCCAGACACUCGUUAUGUGCUUAUGGAUGGUUCCAUCAUACAGUUUCCUAACACUUACCUGGAGGGUUCUGUUAGAGUAG	>FJ882951.1_179	None mir-like hairpin predictions	No	>FJ882951.1_179	No Prediction		No	No
161	>FJ882951.1_181	ACUCGUUAUGUGCUUAUGGAUGGUUCCAUCAUACAGUUUCCUAACACUUACCUGGAGGGUUCUGUUAGAGUAGUAACAACUUUUGAUGCUGAGUACUGUAGACAUGGU	>FJ882951.1_181	None mir-like hairpin predictions	No	>FJ882951.1_181	No Prediction		No	No
163	>FJ882951.1_182	GCUUAUGGAUGGUUCCAUCAUACAGUUUCCUAACACUUACCUGGAGGGUUCUGUUAGAGUAGUAACAACUUUUGAUGCUGAGUACUGUAGACAUGGUACAUGCGAAAGGU	>FJ882951.1_182	None mir-like hairpin predictions	No	>FJ882951.1_182	No Prediction		No	No
165	>FJ882951.1_183	UUACCUGGAGGGUUCUGUUAGAGUAGUAACAACUUUUGAUGCUGAGUACUGUAGACAUGGUACAUGCGAAAGGUCAGAAGUAGGUAUUUGCCUAUCUACCAGUGGUAG	>FJ882951.1_183	None mir-like hairpin predictions	No	>FJ882951.1_183	No Prediction		No	No
167	>FJ882951.1_184	AACUUUUGAUGCUGAGUACUGUAGACAUGGUACAUGCGAAAGGUCAGAAGUAGGUAUUUGCCUAUCUACCAGUGGUAGAUGGGUUCUUAAUAAUGAGCAUUACAGAGCUCUAUCAGGAGUU	>FJ882951.1_184	None mir-like hairpin predictions	No	>FJ882951.1_184	No Prediction		No	No
169	>FJ882951.1_186	AUAAUGAGCAUUACAGAGCUCUAUCAGGAGUUUUCUGUGGUGUUGAUGCGAUGAAUCUCAUAGCUAACAUCUUUACUCCUCUUGUGCAACCUGUGGGUGCUUUAGAUGU	>FJ882951.1_186	-20.9	Yes	>FJ882951.1_186	No Prediction		No	Yes
171	>FJ882951.1_189	UGAAAUUCAGACGUGUUUUUGGUGAGUACAACCAUGUUGUUGCUGCUAAUGCACUUUUGUUUUUGAUGUCUUUCACUAUACUCUGUCUGGUACCA	>FJ882951.1_189	None mir-like hairpin predictions	No	>FJ882951.1_189	No Prediction		No	No
173	>FJ882951.1_194	CAUGUUUUCUCCUAUUGUGCCUUUUUGGAUAACAGCAAUCUAUGUAUUCUGUAUUUCUCUGAAGCACUGCCAUUGGUUCUUUAACAACUAUCUUAGGAAAAGAGUCAUG	>FJ882951.1_194	None mir-like hairpin predictions	No	>FJ882951.1_194	No Prediction		No	No
175	>FJ882951.1_195	GUCAUGUUUAAUGGAGUUACAUUUAGUACCUUCGAGGAGGCUGCUUUGUGUACCUUUUUGCUCAACAAGGAAAUGUACCUAAAAUUGCGUAGC	>FJ882951.1_195	-18	No	>FJ882951.1_195	No Prediction		No	No
177	>FJ882951.1_197	GCUCAACAAGGAAAUGUACCUAAAAUUGCGUAGCGAGACACUGUUGCCACUUACACAGUAUAACAGGUAUCUUGCUCUAUAUAACAAGUACAAGUAUUUCAGUGGAGC	>FJ882951.1_197	None mir-like hairpin predictions	No	>FJ882951.1_197	No Prediction		No	No
179	>FJ882951.1_198	UCAGUGGAGCCUUAGAUACUACCAGCUAUCGUGAAGCAGCUUGCUGCCACUUAGCAAAGGCUCUAAAUGA	>FJ882951.1_198	-21.5	Yes	>FJ882951.1_198	No Prediction		No	Yes
181	>FJ882951.1_200	GCCACUUAGCAAAGGCUCUAAAUGACUUUAGCAACUCAGGUGCUGAUGUUCUCUACCAACCACCACAGACAUCAAUCACUUCUGCUGUUCUGCAGAGUGGU	>FJ882951.1_200	None mir-like hairpin predictions	No	>FJ882951.1_200	No Prediction		No	No
183	>FJ882951.1_203	GCAAAGUUGAAGGGUGCAUGGUACAAGUAACCUGUGGAACUACAACUCUUAAUGGAUUGUGGUUGGAUGACACAGUAUACUGUCCAAGACAUGUCAUUUGC	>FJ882951.1_203	-22.5	Yes	>FJ882951.1_203	>FJ882951.1_203_6_101_16 cand16	-25.5	Yes	Yes
185	>FJ882951.1_204	CUGUGGAACUACAACUCUUAAUGGAUUGUGGUUGGAUGACACAGUAUACUGUCCAAGACAUGUCAUUUGCACAG	>FJ882951.1_204	-19.7	No	>FJ882951.1_204	No Prediction		No	No
187	>FJ882951.1_210	GUUAUUGGCCAUUCUAUGCAAAAUUGUCUGCUUAGGCUUAAAGUUGAUACUUCUAACCCUAAGACACCCAAGUAUAAAUUUGUCCGUAUCCAACCUGGUCAAACAU	>FJ882951.1_210	None mir-like hairpin predictions	No	>FJ882951.1_210	No Prediction		No	No
189	>FJ882951.1_212	AUCUGGUGUUUAUCAGUGUGCCAUGAGACCUAAUUAUACCAUUAAAGGUUCUUUCCUUAAUGGAUCAUGUGGUAGUGUUGGUUUUAACAUUGAUUAUGAUUGCGUGU	>FJ882951.1_212	-24.7	Yes	>FJ882951.1_212	>FJ882951.1_212_0_107_12 cand17	-23.7	Yes	Yes
191	>FJ882951.1_215	AUUUGUUGACAGACAAACUGCACAGGCUGCAGGUACAGACACAACCAUAACAUUAAAUGUUUUGGCAUGGCUGUAUGCUGCUGUUAUCAAUGGUGAUAGGUGGUUUCUUAAUAGAU	>FJ882951.1_215	None mir-like hairpin predictions	No	>FJ882951.1_215	>FJ882951.1_215_5_106_20 cand18	-26.3	Yes	Yes
193	>FJ882951.1_220	UUAGAUAUGUGUGCUGCUUUGAAAGCGCUGCUGCAGAAUGGUAUGAAUGGUCGUACUAUCCUUGGUAGCACUAUUUUAGAAGAUGAGUUUACACCAUUUGA	>FJ882951.1_220	None mir-like hairpin predictions	No	>FJ882951.1_220	>FJ882951.1_220_0_100_19 cand19	-25.9	Yes	Yes
195	>FJ882951.1_221	AGAAGAUGAGUUUACACCAUUUGAUGUUGUUAGACAAUGCUCUGGUGUUACCUUCCAAGGUAAGUUCAAGAAAAUUGUUAAGGGCACUCAUCAUUGGAUGCUUUUAACUUUCU	>FJ882951.1_221	None mir-like hairpin predictions	No	>FJ882951.1_221	No Prediction		No	No
197	>FJ882951.1_225	ACGCAUUCUUGUGCUUGUUUCUGUUACCUUCUCUUGCAACAGUUGCUUACUUUAAUAUGGUCUACAUGCCUGCUAGCUGGGUGAUGCGU	>FJ882951.1_225	None mir-like hairpin predictions	No	>FJ882951.1_225	No Prediction		No	No
199	>FJ882951.1_226	GGUCUACAUGCCUGCUAGCUGGGUGAUGCGUAUCAUGACAUGGCUUGAAUUGGCUGACACUAGCUUGUCUGGUUAUAGGCU	>FJ882951.1_226	-22.2	Yes	>FJ882951.1_226	No Prediction		No	Yes
201	>FJ882951.1_228	GACACUAGCUUGUCUGGUUAUAGGCUUAAGGAUUGUGUUAUGUAUGCUUCAGCUUUAGUUUUGCUUAUUCUCAUGACAGCUCGCACUGUU	>FJ882951.1_228	-17.7	No	>FJ882951.1_228	No Prediction		No	No
203	>FJ882951.1_233	GUGGGCCUUAGUUAUUUCUGUAACCUCUAACUAUUCUGGUGUCGUUACGACUAUCAUGUUUUUAGCUAGAGCUAUAGUGUUUGUGUGUGUUGAGUAUUACCCAU	>FJ882951.1_233	None mir-like hairpin predictions	No	>FJ882951.1_233	No Prediction		No	No
205	>FJ882951.1_236	UCAACCGUUACUUCAGGCUUACUCUUGGUGUUUAUGACUACUUGGUCUCUACACAAGAAUUUAGGUAUAUGAACUCCCAGGGGCUUUUGCCUCCUAAGAGUAGUAUUGA	>FJ882951.1_236	-24.1	Yes	>FJ882951.1_236	>FJ882951.1_236_8_95_20 cand20	-25.4	Yes	Yes
207	>FJ882951.1_239	UUAAGUUGUUGGGUAUUGGAGGUAAACCAUGUAUCAAGGUUGCUACUGUACAGUCUAAAAUGUCUGACGUAAAGUGCACAUCUGUGGUACUGCUCUCGGUUCUUCAACAACUUAG	>FJ882951.1_239	-18.3	No	>FJ882951.1_239	>FJ882951.1_239_10_112_20 cand21	-23.4	Yes	Yes
209	>FJ882951.1_240	UGUCUGACGUAAAGUGCACAUCUGUGGUACUGCUCUCGGUUCUUCAACAACUUAGAGUAGAGUCAUCUUCUAAAUUGUGGGCACAAUGUGUACA	>FJ882951.1_240	None mir-like hairpin predictions	No	>FJ882951.1_240	No Prediction		No	No
211	>FJ882951.1_241	GGCACAAUGUGUACAACUCCACAAUGAUAUUCUUCUUGCAAAAGACACAACUGAAGCUUUCGAGAAGAUGGUUUCUCUUUUGUCUGUUUUGCUAUCCAUGCAGGGUGCU	>FJ882951.1_241	None mir-like hairpin predictions	No	>FJ882951.1_241	No Prediction		No	No
213	>FJ882951.1_244	CUUCAGGCUAUUGCUUCAGAAUUUAGUUCUUUACCAUCAUAUGCCGCUUAUGCCACUGCCCAAGAGGCCUAUGAGCAGGCUGUAGCUAAUGGUGAUUCUGAAG	>FJ882951.1_244	-25.5	Yes	>FJ882951.1_244	>FJ882951.1_244_24_103_8 cand22	-24.3	Yes	Yes
215	>FJ882951.1_245	GGCUAUUGCUUCAGAAUUUAGUUCUUUACCAUCAUAUGCCGCUUAUGCCACUGCCCAAGAGGCCUAUGAGCAGGCUGUAGCUAAUGGUGAUUCUGAAGUCGUUCUC	>FJ882951.1_245	-24.1	Yes	>FJ882951.1_245	No Prediction		No	Yes
217	>FJ882951.1_246	GCUUCAGAAUUUAGUUCUUUACCAUCAUAUGCCGCUUAUGCCACUGCCCAAGAGGCCUAUGAGCAGGCUGUAGCUAAUGGUGAUUCUGAAGUCGUUCUCAAAAAGU	>FJ882951.1_246	-24.2	Yes	>FJ882951.1_246	>FJ882951.1_246_0_103_20 cand23	-32.4	Yes	Yes
219	>FJ882951.1_247	UGAGCAGGCUGUAGCUAAUGGUGAUUCUGAAGUCGUUCUCAAAAAGUUAAAGAAAUCUUUGAAUGUGGCUAAAUCUGAGUUUGACCGUGAUGCUGCCAUGCAACG	>FJ882951.1_247	-16.5	No	>FJ882951.1_247	>FJ882951.1_247_2_105_16 cand24	-25.64	Yes	Yes
221	>FJ882951.1_248	UUUGAAUGUGGCUAAAUCUGAGUUUGACCGUGAUGCUGCCAUGCAACGCAAGUUGGAAAAGAUGGCAGAUCAGGCUAUGACCCAAAUGUACAAA	>FJ882951.1_248	None mir-like hairpin predictions	No	>FJ882951.1_248	No Prediction		No	No
223	>FJ882951.1_261	UGUACUGAUGACAAUGCACUUGCCUACUAUAACAAUUCGAAGGGAGGUAGGUUUGUGCUGGCAUUACUAUCAGACCA	>FJ882951.1_261	-19.3	No	>FJ882951.1_261	>FJ882951.1_261_2_77_3 cand25	-22.21	Yes	Yes
225	>FJ882951.1_262	AGGGAGGUAGGUUUGUGCUGGCAUUACUAUCAGACCACCAAGAUCUCAAAUGGGCUAGAUUCCCUAAGAGUGAUGGUACAGGUACAAUUUACGCAGAACUGGAACCACCUU	>FJ882951.1_262	None mir-like hairpin predictions	No	>FJ882951.1_262	No Prediction		No	No
227	>FJ882951.1_263	GAGGUAGGUUUGUGCUGGCAUUACUAUCAGACCACCAAGAUCUCAAAUGGGCUAGAUUCCCUAAGAGUGAUGGUACAGGUACAAUUUACGCAGAACUGGAACCACCUU	>FJ882951.1_263	None mir-like hairpin predictions	No	>FJ882951.1_263	No Prediction		No	No
229	>FJ882951.1_266	ACAGAAGUACCUGCCAAUUCAACUGUGCUUUCCUUCUGUGCUUUUGCAGUAGACCCUGCUAAAGCAUAUAAGGAUUACCUAGCAAGUGGAGGACAACCAAUCACCAACUGU	>FJ882951.1_266	-25.7	Yes	>FJ882951.1_266	No Prediction		No	Yes
231	>FJ882951.1_267	CACACUGGUACAGGACAGGCAAUUACUGUAACACCAGAAGCUAACAUGGACCAAGAGUCCUUUGGUGGUGCUUCAUGUUGUCUGUAUUGUAGAUGCCACAUUG	>FJ882951.1_267	-26.2	Yes	>FJ882951.1_267	>FJ882951.1_267_0_101_15 cand26	-31.2	Yes	Yes
233	>FJ882951.1_268	GGUGCUUCAUGUUGUCUGUAUUGUAGAUGCCACAUUGACCAUCCAAAUCCUAAAGGAUUCUGUGACUUGAAAGGUAAGUACGUCCAAAUACCUACCACUUGUGCU	>FJ882951.1_268	None mir-like hairpin predictions	No	>FJ882951.1_268	No Prediction		No	No
235	>FJ882951.1_270	CAGUCUGUACCGUCUGCGGAAUGUGGAAAGGUUAUGGCUGUAGUUGUGACCAACUCCGCGAACCCUUGAUGCAGUCUG	>FJ882951.1_270	-25.2	Yes	>FJ882951.1_270	No Prediction		No	Yes
237	>FJ882951.1_271	GCUGUAGUUGUGACCAACUCCGCGAACCCUUGAUGCAGUCUGCGGAUGCAUCAACGUUUUUAAACGGGUUUGCGGUGUAAGUGCAGC	>FJ882951.1_271	-36.4	Yes	>FJ882951.1_271	No Prediction		No	Yes
239	>FJ882951.1_275	GGAUGAGGAAGGCAAUUUAUUAGACUCUUACUUUGUAGUUAAGAGGCAUACUAUGUCUAACUACCAACAUGAAGAGACUAUUUAUAACUUGGUUAAAGAUUGUCC	>FJ882951.1_275	None mir-like hairpin predictions	No	>FJ882951.1_275	No Prediction		No	No
241	>FJ882951.1_276	AGCGGUUGCUGUCCAUGACUUUUUCAAGUUUAGAGUAGAUGGUGACAUGGUACCACAUAUAUCACGUCAGCGUCUAACUAAAUACACAAUGGCUGAUUUAGUCUAUGCU	>FJ882951.1_276	-21	Yes	>FJ882951.1_276	>FJ882951.1_276_8_104_20 cand27	-23.8	Yes	Yes
243	>FJ882951.1_279	CUCUACGUCAUUUUGAUGAGGGUAAUUGUGAUACAUUAAAAGAAAUACUCGUCACAUACAAUUGCUGUGAUGAUGAUUAUUUCAAUAAGAAGGAUUGGUAUGACUUCGUAGAG	>FJ882951.1_279	None mir-like hairpin predictions	No	>FJ882951.1_279	No Prediction		No	No
245	>FJ882951.1_280	GUAUGACUUCGUAGAGAAUCCUGACAUCUUACGCGUAUAUGCUAACUUAGGUGAGCGUGUACGCCAAUCAUUAUUAAAGACUGUACAAUUCUGCGAUGCUAUGC	>FJ882951.1_280	-22.1	Yes	>FJ882951.1_280	>FJ882951.1_280_5_104_18 cand28	-26.44	Yes	Yes
247	>FJ882951.1_281	GUACGCCAAUCAUUAUUAAAGACUGUACAAUUCUGCGAUGCUAUGCGUGAUGCAGGCAUUGUAGGCGUAC	>FJ882951.1_281	-21.4	Yes	>FJ882951.1_281	No Prediction		No	Yes
249	>FJ882951.1_285	GAGUUCCUAUUGUGGAUUCAUAUUACUCAUUGCUGAUGCCCAUCCUCACUUUGAUUAGGGCAUUGGCUGCUGAGUCCCAUAUGGAUGCUGAUCUCGCAAAACCACUU	>FJ882951.1_285	-28.9	Yes	>FJ882951.1_285	>FJ882951.1_285_0_103_17 cand29	-31.4	Yes	Yes
251	>FJ882951.1_290	AACUUUUAGUGUAUGCUGCUGAUCCAGCUAUGCAUGCAGCUUCUGGCAAUUUAUUGCUAGAUAAACGCACUACAUGCUUUUCAGUAGCUGCACUAACAAACAAUGUU	>FJ882951.1_290	-29.4	Yes	>FJ882951.1_290	>FJ882951.1_290_0_104_17 cand30	-38.5	Yes	Yes
253	>FJ882951.1_291	GUUUCAAGGAACUUUUAGUGUAUGCUGCUGAUCCAGCUAUGCAUGCAGCUUCUGGCAAUUUAUUGCUAGAUAAACGCACUACAUGCUUUUCAGUAGCUGCACUAACAAAC	>FJ882951.1_291	-27.2	Yes	>FJ882951.1_291	>FJ882951.1_291_12_110_14 cand31	-38.5	Yes	Yes
255	>FJ882951.1_295	AUGACUAUUAUCGUUAUAAUCUGCCAACAAUGUGUGAUAUCAGACAACUCCUAUUCGUAGUUGAAGUUGUUGAUAAAUACUUUGAUUGUUACGAUGGUGGCUGU	>FJ882951.1_295	-17.5	No	>FJ882951.1_295	>FJ882951.1_295_2_104_12 cand32	-25.62	Yes	Yes
257	>FJ882951.1_296	UAGUUGAAGUUGUUGAUAAAUACUUUGAUUGUUACGAUGGUGGCUGUAUUAAUGCCAACCAAGUAAUCGUUAACAAUCUGGAUAAAUCAGCUG	>FJ882951.1_296	-23.8	Yes	>FJ882951.1_296	>FJ882951.1_296_11_93_9 cand33	-24.2	Yes	Yes
259	>FJ882951.1_297	AGUUGAAGUUGUUGAUAAAUACUUUGAUUGUUACGAUGGUGGCUGUAUUAAUGCCAACCAAGUAAUCGUUAACAAUCUGGAUAAAUCAGCUGGUUUCCCAUU	>FJ882951.1_297	-23.5	Yes	>FJ882951.1_297	>FJ882951.1_297_0_102_19 cand34	-25.8	Yes	Yes
261	>FJ882951.1_298	UGCCAACCAAGUAAUCGUUAACAAUCUGGAUAAAUCAGCUGGUUUCCCAUUUAAUAAAUGGGGUAAGGCUAGACUUUAUUAUGACUCAAUGAGUUAUGAGGAUCA	>FJ882951.1_298	-18.5	No	>FJ882951.1_298	>FJ882951.1_298_5_105_20 cand35	-22.4	Yes	Yes
263	>FJ882951.1_299	GGCUAGACUUUAUUAUGACUCAAUGAGUUAUGAGGAUCAAGAUGCACUUUUCGCGUAUACUAAGCGUAAUGUCAUCCCUACUAUAACUCAAAUGAAUCUUAAGUAUGCC	>FJ882951.1_299	-18.3	No	>FJ882951.1_299	>FJ882951.1_299_6_109_18 cand36	-20.9	Yes	Yes
265	>FJ882951.1_303	ACACCUUAUGGGUUGGGAUUAUCCAAAAUGUGACAGAGCCAUGCCUAACAUGCUUAGGAUAAUGGCCUCUCUUGUUCUUGCUCGCAAACAUAACACUUGCUGU	>FJ882951.1_303	None mir-like hairpin predictions	No	>FJ882951.1_303	No Prediction		No	No
267	>FJ882951.1_304	UGUUCUUGCUCGCAAACAUAACACUUGCUGUAACUUAUCACACCGUUUCUACAGGUUAGCUAACGAGUGUGCGCAAGUAUUAAGUGAGAUGGUCA	>FJ882951.1_304	None mir-like hairpin predictions	No	>FJ882951.1_304	>FJ882951.1_304_7_95_13 cand37	-20.1	Yes	Yes
269	>FJ882951.1_305	UGCUCGCAAACAUAACACUUGCUGUAACUUAUCACACCGUUUCUACAGGUUAGCUAACGAGUGUGCGCAAGUAUUAAGUGAGAUGGUCAUGUGUGGCGGCUCA	>FJ882951.1_305	-19.4	No	>FJ882951.1_305	>FJ882951.1_305_0_103_14 cand38	-30.2	Yes	Yes
271	>FJ882951.1_306	GCGCAAGUAUUAAGUGAGAUGGUCAUGUGUGGCGGCUCACUAUAUGUUAAACCAGGUGGAACAUCAUCCGGUGAUGCUACAACUGCUUAUGCUAAUAGUGU	>FJ882951.1_306	None mir-like hairpin predictions	No	>FJ882951.1_306	No Prediction		No	No
273	>FJ882951.1_307	GCAAGUAUUAAGUGAGAUGGUCAUGUGUGGCGGCUCACUAUAUGUUAAACCAGGUGGAACAUCAUCCGGUGAUGCUACAACUGCUUAUGCUAAUAGUGU	>FJ882951.1_307	None mir-like hairpin predictions	No	>FJ882951.1_307	No Prediction		No	No
275	>FJ882951.1_311	GCACUUCUUUCAACUGAUGGUAAUAAGAUAGCUGACAAGUAUGUCCGCAAUCUACAACACAGGCUCUAUGAGUGU	>FJ882951.1_311	None mir-like hairpin predictions	No	>FJ882951.1_311	No Prediction		No	No
277	>FJ882951.1_313	UAUAGAAAUAGGGAUGUUGAUCAUGAAUUCGUGGAUGAGUUUUACGCUUACCUGCGUAAACAUUUCUCCAUGAUGAUUCUUUCUGAUGAUGCCGUUGUGUGCUAUA	>FJ882951.1_313	-24.8	Yes	>FJ882951.1_313	>FJ882951.1_313_4_101_20 cand39	-26.4	Yes	Yes
279	>FJ882951.1_314	AUUCUUUCUGAUGAUGCCGUUGUGUGCUAUAACAGUAACUAUGCGGCUCAAGGUUUAGUAGCUAGCAUUAAGAACUUUAAGGCAGUUCUUUAUUAUCAAAACAAU	>FJ882951.1_314	None mir-like hairpin predictions	No	>FJ882951.1_314	No Prediction		No	No
281	>FJ882951.1_319	GCCUUACCCAGAUCCAUCAAGAAUAUUAGGCGCAGGCUGUUUUGUCGAUGAUAUUGUCAAAACAGAUGGUACACUUAUGAUUGAAAGGUUCGUGUCACUGGC	>FJ882951.1_319	-19.4	No	>FJ882951.1_319	No Prediction		No	No
283	>FJ882951.1_320	GUCAAAACAGAUGGUACACUUAUGAUUGAAAGGUUCGUGUCACUGGCUAUUGAUGCUUACCCACUUACAAAACAUCCUAAUCAGGAGUAUGCUGAUGUCUUUCAC	>FJ882951.1_320	None mir-like hairpin predictions	No	>FJ882951.1_320	No Prediction		No	No
285	>FJ882951.1_321	UCGUGUCACUGGCUAUUGAUGCUUACCCACUUACAAAACAUCCUAAUCAGGAGUAUGCUGAUGUCUUUCACUUGUAUUUACAAUACAUUAGAAAGUUACAUGA	>FJ882951.1_321	None mir-like hairpin predictions	No	>FJ882951.1_321	No Prediction		No	No
287	>FJ882951.1_326	GGUACUGGGAACCUGAGUUUUAUGAGGCUAUGUACACACCACAUACAGUCUUGCAGGCUGUAGGUGUUUGUGUAUUGUGCAAUUCACAGACUUCACUUCGUUGCGGUGCC	>FJ882951.1_326	-27.1	Yes	>FJ882951.1_326	>FJ882951.1_326_4_106_20 cand40	-29.4	Yes	Yes
289	>FJ882951.1_327	GUUUGUGUAUUGUGCAAUUCACAGACUUCACUUCGUUGCGGUGCCUGUAUUAGGAGACCAUUCCUAUGUUGCAAGUGCUGCUAUGACCAUGUCAUUUCAACAUCACACAAAU	>FJ882951.1_327	-22.4	Yes	>FJ882951.1_327	>FJ882951.1_357_2_98_19 cand41	-22.4	Yes	Yes
291	>FJ882951.1_328	ACAGACUUCACUUCGUUGCGGUGCCUGUAUUAGGAGACCAUUCCUAUGUUGCAAGUGCUGCUAUGACCAUGUCAUUUCAACAUCACACAAAUUAGUGUUGUCUGU	>FJ882951.1_328	-22.4	Yes	>FJ882951.1_328	No Prediction		No	Yes
293	>FJ882951.1_330	GUCACUGAUGUGACACAACUGUAUCUAGGAGGUAUGAGCUAUUAUUGCAAGUCACAUAAGCCUCCCAUUAGUUUUCCAUUAUGUGC	>FJ882951.1_330	-18.3	No	>FJ882951.1_330	No Prediction		No	No
295	>FJ882951.1_331	UAAUGGUCAGGUUUUUGGUUUAUACAAAAACACAUGUGUAGGCAGUGACAAUGUCACUGACUUCAAUGCGAUAGCAACAUGUGAUUGGACUAAUGCUGGCGAUUA	>FJ882951.1_331	None mir-like hairpin predictions	No	>FJ882951.1_331	No Prediction		No	No
297	>FJ882951.1_334	UCAAAGCCACUGAGGAAACAUUUAAGCUGUCAUAUGGUAUUGCUACUGUACGCGAAGUACUCUCUGACAGAGAAUUGCAUCUUUCAUGGGAAGUUGG	>FJ882951.1_334	None mir-like hairpin predictions	No	>FJ882951.1_334	No Prediction		No	No
299	>FJ882951.1_335	UACGCGAAGUACUCUCUGACAGAGAAUUGCAUCUUUCAUGGGAAGUUGGAAAACCUAGACCACCAUUGAACAGAAACUAUGUCUUUACUGGUUACCGUGUA	>FJ882951.1_335	None mir-like hairpin predictions	No	>FJ882951.1_335	No Prediction		No	No
301	>FJ882951.1_338	GGUACUACGACAUACAAGUUGAAUGUUGGUGAUUACUUUGUGUUGACAUCUCACACUGUAAUGCCACUUAGUGCACCUACUCUAGUGCC	>FJ882951.1_338	None mir-like hairpin predictions	No	>FJ882951.1_338	No Prediction		No	No
303	>FJ882951.1_339	UGUUGGUGAUUACUUUGUGUUGACAUCUCACACUGUAAUGCCACUUAGUGCACCUACUCUAGUGCCACAAGAGCACUAUGUGAGAAUUACUGGCUUGUACCCAACA	>FJ882951.1_339	None mir-like hairpin predictions	No	>FJ882951.1_339	No Prediction		No	No
305	>FJ882951.1_341	GCAAAUUAUCAAAAGGUCGGCAUGCAAAAGUACUCUACACUCCAAGGACCACCUGGUACUGGUAAGAGUCAUUUUGCCAUCGGACUUGCUCUCUAUUACCCAUCUGC	>FJ882951.1_341	-22.3	Yes	>FJ882951.1_341	No Prediction		No	Yes
307	>FJ882951.1_342	GGCAUGCAAAAGUACUCUACACUCCAAGGACCACCUGGUACUGGUAAGAGUCAUUUUGCCAUCGGACUUGCUCUCUAUUACCCAUCUGCUCGCAUAGUGUAUACGGCAUGCU	>FJ882951.1_342	None mir-like hairpin predictions	No	>FJ882951.1_342	No Prediction		No	No
309	>FJ882951.1_345	UCAAAGUGAAUUCAACACUAGAACAGUAUGUUUUCUGCACUGUAAAUGCAUUGCCAGAAACAACUGCUGACAUUGUAGUCUUUGAUGAAAUCUCUAUGG	>FJ882951.1_345	-18.1	No	>FJ882951.1_345	No Prediction		No	No
311	>FJ882951.1_346	GAUAAAUUCAAAGUGAAUUCAACACUAGAACAGUAUGUUUUCUGCACUGUAAAUGCAUUGCCAGAAACAACUGCUGACAUUGUAGUCUUUGAUGAAAUC	>FJ882951.1_346	-17.3	No	>FJ882951.1_346	No Prediction		No	No
313	>FJ882951.1_355	GGAUUGCCUACGCAGACUGUUGAUUCAUCACAGGGUUCUGAAUAUGACUAUGUCAUAUUCACACAAACUACUGAAACAGCACACUCUUGUAAUGUCAACC	>FJ882951.1_355	-19.1	No	>FJ882951.1_355	No Prediction		No	No
315	>FJ882951.1_356	UCAUAUUCACACAAACUACUGAAACAGCACACUCUUGUAAUGUCAACCGCUUCAAUGUGGCUAUCACAAGGGCAAAAAUUGGCAUUUUGUGCAUAAUGUCUGAUAGA	>FJ882951.1_356	None mir-like hairpin predictions	No	>FJ882951.1_356	No Prediction		No	No
317	>FJ882951.1_357	AUGUGGCUAUCACAAGGGCAAAAAUUGGCAUUUUGUGCAUAAUGUCUGAUAGAGAUCUUUAUGACAAACUGCAAUUUACAAGUCUAGAAAUACCACGU	>FJ882951.1_357	-16.5	No	>FJ882951.1_357	No Prediction		No	No
319	>FJ882951.1_358	UGACAAACUGCAAUUUACAAGUCUAGAAAUACCACGUCGCAAUGUGGCUACAUUACAAGCAGAAAAUGUAACUGGACUUUUUAAGGACUGUAGUAAGAUCA	>FJ882951.1_358	None mir-like hairpin predictions	No	>FJ882951.1_358	No Prediction		No	No
321	>FJ882951.1_359	CUGGUCUUCAUCCUACACAGGCACCUACACACCUCAGCGUUGAUAUAAAGUUCAAGACUGAAGGAUUAUGUGUUGACAUACCAG	>FJ882951.1_359	-19.6	No	>FJ882951.1_359	No Prediction		No	No
323	>FJ882951.1_360	UUGACAUACCAGGCAUACCAAAGGACAUGACCUACCGUAGACUCAUCUCUAUGAUGGGUUUCAAAAUGAAUUACCAAGUCAA	>FJ882951.1_360	None mir-like hairpin predictions	No	>FJ882951.1_360	No Prediction		No	No
325	>FJ882951.1_363	CGUAGCCGGCUGUCAUGCAACUAGAGAUGCUGUGGGUACUAACCUACCUCUCCAGCUAGGAUUUUCUACAGGUGUUAACUUAGUAGCUGUACCGACUGGUUAUG	>FJ882951.1_363	-17.3	No	>FJ882951.1_363	>FJ882951.1_363_1_104_10 cand42	-28.4	Yes	Yes
327	>FJ882951.1_364	GGUGUUAACUUAGUAGCUGUACCGACUGGUUAUGUUGACACUGAAAAUAACACAGAAUUCACCAGAGUUAAUGCAAAACCUCCACCAGGUGACCAGUUUAAACAUCUUAUACC	>FJ882951.1_364	None mir-like hairpin predictions	No	>FJ882951.1_364	No Prediction		No	No
329	>FJ882951.1_368	ACACUGAAAGGAUUGUCAGACAGAGUCGUGUUCGUCCUUUGGGCGCAUGGCUUUGAGCUUACAUCAAUGAAGUACUUUGUCAAGAUUGGACCUGAAAGAACGUGU	>FJ882951.1_368	None mir-like hairpin predictions	No	>FJ882951.1_368	No Prediction		No	No
331	>FJ882951.1_369	UGAGCUUACAUCAAUGAAGUACUUUGUCAAGAUUGGACCUGAAAGAACGUGUUGUCUGUGUGACAAACGUGCAACUUGCUUUUCUACUUCAUCAGAUACUUA	>FJ882951.1_369	None mir-like hairpin predictions	No	>FJ882951.1_369	No Prediction		No	No
333	>FJ882951.1_371	UACUUCAUCAGAUACUUAUGCCUGCUGGAAUCAUUCUGUGGGUUUUGACUAUGUCUAUAACCCAUUUAUGAUUGAUGUUCAGCAGUGGGGCUUUACGGGUAACCUUCAGAGUA	>FJ882951.1_371	-25.2	Yes	>FJ882951.1_371	No Prediction		No	Yes
335	>FJ882951.1_372	UACUUCAUCAGAUACUUAUGCCUGCUGGAAUCAUUCUGUGGGUUUUGACUAUGUCUAUAACCCAUUUAUGAUUGAUGUUCAGCAGUGGGGCUUUACGGGUA	>FJ882951.1_372	-25.2	Yes	>FJ882951.1_372	No Prediction		No	Yes
337	>FJ882951.1_373	GACCAACAUUGCCAGGUACAUGGAAAUGCACAUGUGGCUAGUUGUGAUGCUAUCAUGACUAGAUGUUUAGCAGUCCAUGAGUGCUUUGUUAAGCGCGUUGAUUGGUC	>FJ882951.1_373	None mir-like hairpin predictions	No	>FJ882951.1_373	No Prediction		No	No
339	>FJ882951.1_374	UCAUGACUAGAUGUUUAGCAGUCCAUGAGUGCUUUGUUAAGCGCGUUGAUUGGUCUGUUGAAUACCCUAUUAUAGGAGAUGA	>FJ882951.1_374	None mir-like hairpin predictions	No	>FJ882951.1_374	>FJ882951.1_374_0_75_10 cand43	-23.8	Yes	Yes
341	>FJ882951.1_377	UGGAAAUCCAAAGGCUAUCAAGUGUGUGCCUCAGGCUGAAGUAGAAUGGAAGUUCUACGAUGCUCAGCCAUGUAGUGACAAAGCUUACAAAAUAGAGGAGCUCUUCUA	>FJ882951.1_377	None mir-like hairpin predictions	No	>FJ882951.1_377	No Prediction		No	No
343	>FJ882951.1_380	GAGUCUUGUCAAACUUGAACUUACCAGGCUGUGAUGGUGGUAGUUUGUAUGUGAAUAAGCAUGCAUUCCACACUCCAGCUUUCGAUAAAAGUGCAUUUACUAAUUU	>FJ882951.1_380	-22.7	Yes	>FJ882951.1_380	>FJ882951.1_380_5_103_20 cand44	-23.39	Yes	Yes
345	>FJ882951.1_384	CCAUGCAAAUGAGUACCGACAGUACUUGGAUGCAUAUAAUAUGAUGAUUUCUGCUGGAUUUAGCCUAUGGAUUUACAAACAAUUUGAUACUUAUAACCUGUGG	>FJ882951.1_384	None mir-like hairpin predictions	No	>FJ882951.1_384	No Prediction		No	No
347	>FJ882951.1_385	CCUAUGGAUUUACAAACAAUUUGAUACUUAUAACCUGUGGAAUACAUUUACCAGGUUACAGAGUUUAGAAAAUGUGGCUUAUAAUGUUGUUAAUAAAGG	>FJ882951.1_385	-12.2	No	>FJ882951.1_385	No Prediction		No	No
349	>FJ882951.1_386	GUUUAGAAAAUGUGGCUUAUAAUGUUGUUAAUAAAGGACACUUUGAUGGACACGCCGGCGAAGCACCUGUUUCCAUCAUUAAUAAUGCUGUUUACACAAAGGUAGAU	>FJ882951.1_386	-14.9	No	>FJ882951.1_386	No Prediction		No	No
351	>FJ882951.1_388	UGUGGAGAUCUUUGAAAAUAAGACAACACUUCCUGUUAAUGUUGCAUUUGAGCUUUGGGCUAAGCGUAACAUUAAACCAGUGCCAGAGAUUAAGAUACUCAAUA	>FJ882951.1_388	None mir-like hairpin predictions	No	>FJ882951.1_388	No Prediction		No	No
353	>FJ882951.1_389	GGUAUUGAUGUGGAGAUCUUUGAAAAUAAGACAACACUUCCUGUUAAUGUUGCAUUUGAGCUUUGGGCUAAGCGUAACAUUAAACCAGUGCCAGAGAUUAAGAUACU	>FJ882951.1_389	None mir-like hairpin predictions	No	>FJ882951.1_389	No Prediction		No	No
355	>FJ882951.1_392	UCAAUAAUUUGGGUGUUGAUAUCGCUGCUAAUACUGUAAUCUGGGACUAUAAAAGAGAAGCCCCAGCACAUGUAUCUACAAUAGGUGUCUGCACAAUGACUGA	>FJ882951.1_392	-22.8	Yes	>FJ882951.1_392	No Prediction		No	Yes
357	>FJ882951.1_393	GGACUAUAAAAGAGAAGCCCCAGCACAUGUAUCUACAAUAGGUGUCUGCACAAUGACUGACAUUGCCAAGAAACCUACUGAGAGUGCUUGUUCUUCACUUACUGUCU	>FJ882951.1_393	-22.2	Yes	>FJ882951.1_393	>FJ882951.1_393_4_107_20 cand45	-28	Yes	Yes
359	>FJ882951.1_394	CAUUGCCAAGAAACCUACUGAGAGUGCUUGUUCUUCACUUACUGUCUUGUUUGAUGGUAGAGUGGAAGGACAGGUAGACCUUUUUAGAAACGCCCGUAAUG	>FJ882951.1_394	-28.1	Yes	>FJ882951.1_394	No Prediction		No	Yes
361	>FJ882951.1_395	GUCUUGUUUGAUGGUAGAGUGGAAGGACAGGUAGACCUUUUUAGAAACGCCCGUAAUGGUGUUUUAAUAACAGAAGGUUCAGUCAAAGGUCUAACACCUUCAAAGGGAC	>FJ882951.1_395	-18.5	No	>FJ882951.1_395	No Prediction		No	No
363	>FJ882951.1_397	CAGCACAAGCUAGCGUCAAUGGAGUCACAUUAAUUGGAGAAUCAGUAAAAACACAGUUUAACUACUCUAAGAAAGUAGACGGCAUUAUUCAACAGUUGCCUG	>FJ882951.1_397	None mir-like hairpin predictions	No	>FJ882951.1_397	No Prediction		No	No
365	>FJ882951.1_398	AGAAUCAGUAAAAACACAGUUUAACUACUCUAAGAAAGUAGACGGCAUUAUUCAACAGUUGCCUGAAACCUACUUUACUCAGAGCAGAGACUUAGAGGAUUUU	>FJ882951.1_398	-17.5	No	>FJ882951.1_398	No Prediction		No	No
367	>FJ882951.1_399	GUUUAACUACUCUAAGAAAGUAGACGGCAUUAUUCAACAGUUGCCUGAAACCUACUUUACUCAGAGCAGAGACUUAGAGGAUUUUAAGC	>FJ882951.1_399	None mir-like hairpin predictions	No	>FJ882951.1_399	No Prediction		No	No
369	>FJ882951.1_400	GACUUUCUCGAGCUCGCUAUGGAUGAAUUCAUACAGCGAUAUAAGCUCGAGGGCUAUGCCUUCGAACACAUCGUUUAUGGAGAUUUCAGUCAUGGACAACUUGGCGGUC	>FJ882951.1_400	-26.6	Yes	>FJ882951.1_400	>FJ882951.1_400_6_107_20 cand46	-32.3	Yes	Yes
371	>FJ882951.1_402	UAUGGACAGCACAGUGAAAAAUUACUUCAUAACAGAUGCGCAAACAGGUUCAUCAAAAUGUGUGUGUUCUGUGAUUGAUCUUUUACUUGAUGACUUUGUCGAGAUA	>FJ882951.1_402	-16.8	No	>FJ882951.1_402	>FJ882951.1_402_0_101_20 cand47	-22.1	Yes	Yes
373	>FJ882951.1_405	CUAUGCUGAGAUUUCAUUCAUGCUUUGGUGUAAGGACGGACAUGUUGAAACCUUCUACCCAAAACUACAAGCAAGUCAAGCGUGG	>FJ882951.1_405	-18	No	>FJ882951.1_405	No Prediction		No	No
375	>FJ882951.1_408	ACUUAAAUACACUUACUUUAGCUGUACCCUACAACAUGAGAGUUAUUCACUUUGGUGCUGGCUCUGAUAAAGGAGUUGCACCAGGUACAGCUGUGCUCAGACAAUGGU	>FJ882951.1_408	-21	Yes	>FJ882951.1_408	No Prediction		No	Yes
377	>FJ882951.1_412	UUCUACUUUAAUUGGAGACUGUGCAACAGUACAUACGGCUAAUAAAUGGGACCUUAUUAUUAGCGAUAUGUAUGACCCUAGGACCAAACAUGUGACAA	>FJ882951.1_412	-18.1	No	>FJ882951.1_412	No Prediction		No	No
379	>FJ882951.1_416	GGCCAUUUCUCAUGGUGGACAGCUUUUGUUACAAAUGUAAAUGCAUCAUCAUCGGAAGCAUUUUUAAUUGGGGCUAACUAUCUUGGCAAGCC	>FJ882951.1_416	-17.9	No	>FJ882951.1_416	No Prediction		No	No
381	>FJ882951.1_417	GGCCAUUUCUCAUGGUGGACAGCUUUUGUUACAAAUGUAAAUGCAUCAUCAUCGGAAGCAUUUUUAAUUGGGGCUAACUAUCUUGGCAAGCCGAAGGAACAAAUUGAUGGCU	>FJ882951.1_417	-16.1	No	>FJ882951.1_417	No Prediction		No	No
383	>FJ882951.1_422	GAACAUGUUUAUUUUCUUAUUAUUUCUUACUCUCACUAGUGGUAGUGACCUUGACCGGUGCACCACUUUUGAUGAUGUUCAAGCUCCUAAUUACACUCAACAUACUUC	>FJ882951.1_422	None mir-like hairpin predictions	No	>FJ882951.1_422	No Prediction		No	No
385	>FJ882951.1_424	AACAUACUUCAUCUAUGAGGGGGGUUUACUAUCCUGAUGAAAUUUUUAGAUCAGACACUCUUUAUUUAACUCAGGAUUUAUUUCUUCCAUUUUAUUCUAAUGUU	>FJ882951.1_424	None mir-like hairpin predictions	No	>FJ882951.1_424	No Prediction		No	No
387	>FJ882951.1_428	GUCGGUGAUUAUUAUUAACAAUUCUACUAAUGUUGUUAUACGAGCAUGUAACUUUGAAUUGUGUGACAACCCUUUCUUUGCUGUUUCUAAACCCAUGGGUAC	>FJ882951.1_428	None mir-like hairpin predictions	No	>FJ882951.1_428	No Prediction		No	No
389	>FJ882951.1_430	GGGUACACAGACACAUACUAUGAUAUUCGAUAAUGCAUUUAAUUGCACUUUCGAGUACAUAUCUGAUGCCU	>FJ882951.1_430	-20.4	Yes	>FJ882951.1_430	No Prediction		No	Yes
391	>FJ882951.1_444	UGCUGAUUAUAAUUAUAAAUUGCCAGAUGAUUUCAUGGGUUGUGUCCUUGCUUGGAAUACUAGGAACAUUGAUGCUACUUCAACUGGUAAUCAUAAUUAUAAAUAUAGGUA	>FJ882951.1_444	-19.9	No	>FJ882951.1_444	>FJ882951.1_444_4_107_20 cand48	-26.31	Yes	Yes
393	>FJ882951.1_445	AUAAUUAUAAAUAUAGGUAUCUUAGACAUGGCAAGCUUAGGCCCUUUGAGAGAGACAUAUCUAAUGUGCCUUUCUCCCCUGAUGGCAAACCUUGCACCCCACCUGCUCUUAAUUGU	>FJ882951.1_445	None mir-like hairpin predictions	No	>FJ882951.1_445	No Prediction		No	No
395	>FJ882951.1_446	ACCUGCUCUUAAUUGUUAUUGGCCAUUAAAUGAUUAUGGUUUUUACACCACUACUGGCAUUGGCUACCAACCUUACAGAGUUGU	>FJ882951.1_446	None mir-like hairpin predictions	No	>FJ882951.1_446	No Prediction		No	No
397	>FJ882951.1_448	UGACCUUAUUAAGAACCAGUGUGUCAAUUUUAAUUUUAAUGGACUCACUGGUACUGGUGUGUUA	>FJ882951.1_448	-17.7	No	>FJ882951.1_448	No Prediction		No	No
399	>FJ882951.1_451	ACCAUUUCAACAAUUUGGCCGUGAUGUUUCUGAUUUCACUGAUUCCGUUCGAGAUCCUAAAACAUCUGAAAUAUUAGACAUUUCGCCUUGCUCUUUUGGGGGUGU	>FJ882951.1_451	None mir-like hairpin predictions	No	>FJ882951.1_451	No Prediction		No	No
401	>FJ882951.1_455	CAGACUCAAGCAGGCUGUCUUAUAGGAGCUGAGCAUGUCGACACUUCUUAUGAGUGCGACAUUCCUAUUGGAGCUGGCAUUUG	>FJ882951.1_455	-24.5	Yes	>FJ882951.1_455	No Prediction		No	Yes
403	>FJ882951.1_456	GGCAUUUGUGCUAGUUACCAUACAGUUUCUUUAUUACGUAGUACUAGCCAAAAAUCUAUUGUGGCUUAUACUAUGUCUUUAGGUGCUGAUAGUUCAAUUGCU	>FJ882951.1_456	-21.2	Yes	>FJ882951.1_456	No Prediction		No	Yes
405	>FJ882951.1_457	UACUACAGAAGUAAUGCCUGUUUCUAUGGCUAAAACCUCCGUAGAUUGUAAUAUGUACAUCUGCGGAGAUUCUACUGAAUGUGCUAAUUUGCUUCUCCAAUAUGGUA	>FJ882951.1_457	None mir-like hairpin predictions	No	>FJ882951.1_457	No Prediction		No	No
407	>FJ882951.1_458	AUCUGCGGAGAUUCUACUGAAUGUGCUAAUUUGCUUCUCCAAUAUGGUAGCUUUUGCACACAACUAAAUCGUGCACUCUCAGGU	>FJ882951.1_458	None mir-like hairpin predictions	No	>FJ882951.1_458	No Prediction		No	No
409	>FJ882951.1_460	AGGAUCGCAACACACGUGAAGUGUUCGCUCAAGUCAAACAAAUGUACAAAACCCCAACUUUGAAAUAUUUUGGUGGUUUUAAUUUUUCACAAAUGUUACCUGACCCU	>FJ882951.1_460	None mir-like hairpin predictions	No	>FJ882951.1_460	No Prediction		No	No
411	>FJ882951.1_461	GUUUUAAUUUUUCACAAAUGUUACCUGACCCUCUAAAGCCAACUAAGAGGUCUUUUAUUGAGGACUUGCUCUUUAAUAAGGUGACACUCGCUGAUGCUGGC	>FJ882951.1_461	-19.6	No	>FJ882951.1_461	No Prediction		No	No
413	>FJ882951.1_466	GGACAUUUGGUGCUGGCGCUGCUCUUCAAAUACCUUUUGCUAUGCAAAUGGCAUAUAGGUUCAAUGGCAUUGGAGUUACCCAAAAUGUUC	>FJ882951.1_466	-23.6	Yes	>FJ882951.1_466	No Prediction		No	Yes
415	>FJ882951.1_470	AGUCGAGGCGGAGGUACAAAUUGACAGGUUAAUUACAGGCAGACUUCAAAGCCUUCAAACCUAUGUAACACAACAACUAAUCAGGGCUGCUGAAAUCAGGGCUUCUGCU	>FJ882951.1_470	None mir-like hairpin predictions	No	>FJ882951.1_470	No Prediction		No	No
417	>FJ882951.1_471	GGCAGACUUCAAAGCCUUCAAACCUAUGUAACACAACAACUAAUCAGGGCUGCUGAAAUCAGGGCUUCUGCU	>FJ882951.1_471	None mir-like hairpin predictions	No	>FJ882951.1_471	No Prediction		No	No
419	>FJ882951.1_473	UGAGUGUGUUCUUGGACAAUCAAAAAGAGUUGACUUUUGUGGAAAGGGCUACCACCUUAUGUCCUUCCCACAAGCAGCCCCGCAUGGUGUUGUCUUCCUACAUGUCA	>FJ882951.1_473	-23.8	Yes	>FJ882951.1_473	No Prediction		No	Yes
421	>FJ882951.1_475	GUGUUGUCUUCCUACAUGUCACGUAUGUGCCAUCCCAGGAGAGGAACUUCACCACAGCGCCAGCAAUUUGUCAUGAAGGCAAAGC	>FJ882951.1_475	None mir-like hairpin predictions	No	>FJ882951.1_475	No Prediction		No	No
423	>FJ882951.1_476	GUGCCAUCCCAGGAGAGGAACUUCACCACAGCGCCAGCAAUUUGUCAUGAAGGCAAAGCAUACUUCCCUCGUGAAGGUGUUUUUGUGUUUAAUGGCAC	>FJ882951.1_476	None mir-like hairpin predictions	No	>FJ882951.1_476	No Prediction		No	No
425	>FJ882951.1_485	AAUUGGGAAAAUAUGAGCAAUAUAUUAAAUGGCCUUGGUAUGUUUGGCUCGGCUUCAUUGCUGGACUAAUUGCCAUCGUCAUGGUUACAAUCUUGCUUUGUUGCAUGACUAGUU	>FJ882951.1_485	None mir-like hairpin predictions	No	>FJ882951.1_485	No Prediction		No	No
427	>FJ882951.1_486	CUUGCUUUGUUGCAUGACUAGUUGUUGCAGUUGCCUCAAGGGUGCAUGCUCUUGUGGUUCUUGCUGCAAGUUUGAUGAGGAUGACUCUGAGCCAG	>FJ882951.1_486	None mir-like hairpin predictions	No	>FJ882951.1_486	>FJ882951.1_486_3_95_15 cand49	-28.7	Yes	Yes
429	>FJ882951.1_488	ACUCUGAGCCAGUUCUCAAGGGUGUCAAAUUACAUUACACAUAAACGAACUUAUGGAUUUGUUUAUGAGAUUUUUUACUCUUGGAUCAAUUACUGCACAGCCAGU	>FJ882951.1_488	-15.8	No	>FJ882951.1_488	>FJ882951.1_488_0_101_19 cand50	-21.8	Yes	Yes
431	>FJ882951.1_491	GCAACGAUACCGCUACAAGCCUCACUCCCUUUCGGAUGGCUUGUUAUUGGCGUUGC	>FJ882951.1_491	-19.4	No	>FJ882951.1_491	>FJ882951.1_491_0_56_0 cand51	-21.2	Yes	Yes
433	>FJ882951.1_494	GCUUCCAGUUCAUUUGCAAUUUACUGCUGCUAUUUGUUACCAUCUAUUCACAUCUUUUGCUUGUCGCUGCAGGUAUGGAGGC	>FJ882951.1_494	None mir-like hairpin predictions	No	>FJ882951.1_494	No Prediction		No	No
435	>FJ882951.1_497	UUUGUACCUCUAUGCCUUGAUAUAUUUUCUACAAUGCAUCAACGCAUGUAGAAUUAUUAUGAGAUGUUGGCUUUGUUGGAAGUGCAAA	>FJ882951.1_497	-21.6	Yes	>FJ882951.1_497	No Prediction		No	Yes
437	>FJ882951.1_500	GGUGACGGCAUUUCAACACCAAAACUCAAAGAAGACUACCAAAUUGGUGGUUAUUCUGAGGAUAGGCACUCAGGUGUUAAAGACUAUGUCGUUGUACAUGGCUAUUUCACC	>FJ882951.1_500	-23.5	Yes	>FJ882951.1_500	No Prediction		No	Yes
439	>FJ882951.1_505	UCGACGGCUCUUCAGGAGUUGCUAAUCCAGCAAUGGAUCCAAUUUAUGAUGUGCCGACGA	>FJ882951.1_505	-22.3	Yes	>FJ882951.1_505	No Prediction		No	Yes
441	>FJ882951.1_509	GGUACGUUAAUAGUUAAUAGCGUACUUCUUUUUCUUGCUUUCGUGGUAUUCUUGCUAGUCACACUAGCCAUCCUUACUGCGCUUCGAUUGUGUGCGUACU	>FJ882951.1_509	None mir-like hairpin predictions	No	>FJ882951.1_509	No Prediction		No	No
443	>FJ882951.1_515	CCGUUGAGAAGCUUAAACAACUCCUGGAACAAUGGAACCUAGUAAUAGGUUUCCUAUUCCUAGCCUGGAUUAUGUUACUACAAUUUGCCUAUUCUAAUCGG	>FJ882951.1_515	None mir-like hairpin predictions	No	>FJ882951.1_515	No Prediction		No	No
445	>FJ882951.1_519	UUGGGUGACUGGCGGGAUUGCGAUUGCAAUGGCUUGUAUUGUAGGCUUGAUGUGGCUUAGCUACUUCGUUGCUUCCUUCAGGCUGUUUGCUCGUACCCGCUCAAUGUGGUCAUUCAA	>FJ882951.1_519	-25.7	Yes	>FJ882951.1_519	>FJ882951.1_519_7_110_20 cand52	-37.2	Yes	Yes
447	>FJ882951.1_521	UGGUCAUUCAACCCAGAAACAAACAUUCUUCUCAAUGUGCCUCUCCGGGGGACAAUUGUGACCA	>FJ882951.1_521	-15.9	No	>FJ882951.1_521	No Prediction		No	No
449	>FJ882951.1_522	GUGACCAGACCGCUCAUGGAAAGUGAACUUGUCAUUGGUGCUGUGAUCAUUCGUGGUCACUUGCGAAUGGCCGGACACCCCCUAGGGCGCUGUGACAU	>FJ882951.1_522	-28.5	Yes	>FJ882951.1_522	No Prediction		No	Yes
451	>FJ882951.1_523	CCUAGGGCGCUGUGACAUUAAGGACCUGCCAAAAGAGAUCACUGUGGCUACAUCACGAACGCUUUCUUAUUACAAAUUAGGAGCGUCGCAGCGUGUAGG	>FJ882951.1_523	None mir-like hairpin predictions	No	>FJ882951.1_523	No Prediction		No	No
453	>FJ882951.1_526	AUACAGACCACGCCGGUAGCAACGACAAUAUUGCUUUGCUAGUACAGUAAGUGACAACAGAUGUUUCAUCUUGUUGACUUCCAGGUUACAAU	>FJ882951.1_526	None mir-like hairpin predictions	No	>FJ882951.1_526	No Prediction		No	No
455	>FJ882951.1_527	UGUUUCAUCUUGUUGACUUCCAGGUUACAAUAGCAGAGAUAUUGAUUAUCAUUAUGAGGACUUUCAGGAUUGCUAUUUGGAAUCUUGACGUUAUAAUAAGUUCAAUAGUGAGACA	>FJ882951.1_527	-15.9	No	>FJ882951.1_527	No Prediction		No	No
457	>FJ882951.1_528	UAAGAAGAAUUAUUCGGAGUUAGAUGAUGAAGAACCUAUGGAGUUAGAUUAUCCAUAAAACGAACAUGAAAAUUAUUCUCUUCCUGACAUUGAUUGUAUUUACAUCUUG	>FJ882951.1_528	None mir-like hairpin predictions	No	>FJ882951.1_528	No Prediction		No	No
459	>FJ882951.1_532	UUGCUUUUGCUUGUGCUGACGGUACUCGACAUACCUAUCAGCUGCGUGCAAGAUCAG	>FJ882951.1_532	-17.7	No	>FJ882951.1_532	No Prediction		No	No
461	>FJ882951.1_535	UAAUACUUUGCUUCACCAUUAAGAGAAAGACAGAAUGAAUGAGCUCACUUUAAUUGACUUCUAUUUGUGCUUUUUAGCCUUUCUGCUAUUCCUUGUUUUAAUAAUGCUUAUUA	>FJ882951.1_535	-10.3	No	>FJ882951.1_535	No Prediction		No	No
463	>FJ882951.1_536	GAAAGACAGAAUGAAUGAGCUCACUUUAAUUGACUUCUAUUUGUGCUUUUUAGCCUUUCUGCUAUUCCUUGUUUUAAUAAUGCUUAUUAUAUUUUGGUUUUC	>FJ882951.1_536	None mir-like hairpin predictions	No	>FJ882951.1_536	No Prediction		No	No
465	>FJ882951.1_544	AGUACAGCGCUGUGCAUCUAAUAAACCUCAUGUGCUUGAAGAUCCUUGUAAGGUACAACACUAGGGGUAAUACUUAUAGCACUGCUUGGCUUUGUGCU	>FJ882951.1_544	None mir-like hairpin predictions	No	>FJ882951.1_544	No Prediction		No	No
467	>FJ882951.1_548	UUAAAAUGUCUGAUAAUGGACCCCAAUCAAACCAACGUAGUGCCCCCCGCAUUACAUUUGGUGGACCCACAGAUUCAACUGACAAUAA	>FJ882951.1_548	None mir-like hairpin predictions	No	>FJ882951.1_548	No Prediction		No	No
469	>FJ882951.1_549	UGCCCCCCGCAUUACAUUUGGUGGACCCACAGAUUCAACUGACAAUAACCAGAAUGGAGGACGCAAUGGGGCA	>FJ882951.1_549	-18.7	No	>FJ882951.1_549	No Prediction		No	No
471	>FJ882951.1_550	CUGACAAUAACCAGAAUGGAGGACGCAAUGGGGCAAGGCCAAAACAGCGCCGACCCCAAGGUUUACCCAAUAAUACUGCGUCUUGGUUCACAGCUCUCACUCAG	>FJ882951.1_550	None mir-like hairpin predictions	No	>FJ882951.1_550	No Prediction		No	No
473	>FJ882951.1_553	GAACUUAGAUUCCCUCGAGGCCAGGGCGUUCCAAUCAACACCAAUAGUGGUCCAGAUGACCAAAUUGGCUACUACCGAAGAGCUACCCGACGAGUUC	>FJ882951.1_553	None mir-like hairpin predictions	No	>FJ882951.1_553	No Prediction		No	No
475	>FJ882951.1_554	CGAGGCCAGGGCGUUCCAAUCAACACCAAUAGUGGUCCAGAUGACCAAAUUGGCUACUACCGAAGAGCUACCCGACGAGUUCG	>FJ882951.1_554	None mir-like hairpin predictions	No	>FJ882951.1_554	No Prediction		No	No
477	>FJ882951.1_556	CUCAGCCCCAGAUGGUACUUCUAUUACCUAGGAACUGGCCCAGAAGCUUCACUUCCCUACGGCGCUAACAAAGAAGGCAUCGUAUGGGUUGCAACUGAG	>FJ882951.1_556	None mir-like hairpin predictions	No	>FJ882951.1_556	No Prediction		No	No
479	>FJ882951.1_558	GGCAUCGUAUGGGUUGCAACUGAGGGAGCCUUGAAUACACCCAAAGACCACAUUGGCACCCGCAAUCCUAAUAACAAUGCU	>FJ882951.1_558	-20.5	Yes	>FJ882951.1_558	No Prediction		No	Yes
481	>FJ882951.1_559	AUUGCCAAAAGGCUUCUACGCAGAGGGAAGCAGAGGCGGCAGUCAAGCCUCUUCUCGCUCCUCAUCACGUAGUCGCGGUAAU	>FJ882951.1_559	-30.4	Yes	>FJ882951.1_559	No Prediction		No	Yes
483	>FJ882951.1_560	UCAUCACGUAGUCGCGGUAAUUCAAGAAAUUCAACUCCUGGCAGCAGUAGGGGAAAUUCUCCUGCUCGAAUGGCUAGCGGAGGUGGUGA	>FJ882951.1_560	None mir-like hairpin predictions	No	>FJ882951.1_560	No Prediction		No	No
485	>FJ882951.1_563	GCUUGAGAGCAAAGUUUCUGGUAAAGGCCAACAACAACAAGGCCAAACUGUCACUAAGAAAUCUGCUGCUGAGGC	>FJ882951.1_563	-19.4	No	>FJ882951.1_563	No Prediction		No	No
487	>FJ882951.1_570	UGUCACGCAUUGGCAUGGAAGUCACACCUUCGGGAACAUGGCUGACUUAUCAUGGAGCCAUUAAAUUGGAUGACA	>FJ882951.1_570	-16.5	No	>FJ882951.1_570	No Prediction		No	No
489	>FJ882951.1_571	GAAAAAGACUGAUGAAGCUCAGCCUUUGCCGCAGAGACAAAAGAAGCAGCCCACUGUGACUCUUCUUCCUGCGGCUGACAUGGAUGAUUUCUCCAGACAACUUC	>FJ882951.1_571	-24.7	Yes	>FJ882951.1_571	No Prediction		No	Yes
491	>FJ882951.1_574	UCAUGAUGACCACACAAGGCAGAUGGGCUAUGUAAACGUUUUCGCAAUUCCGUUUACGAUACAUAGUCUACUCUUGUGCAGAAUGA	>FJ882951.1_574	-24.7	Yes	>FJ882951.1_574	No Prediction		No	Yes
493	>FJ882951.1_576	GUAGGUUUAGUUAACUUUAAUCUCACAUAGCAAUCUUUAAUCAAUGUGUAACAUUAGGGAGGACUUGAAAGAGCCACCAC	>FJ882951.1_576	None mir-like hairpin predictions	No	>FJ882951.1_576	No Prediction		No	No

## Sheet: Mature miRNA
				Position 10 (5' stem)			Position 35 (3' stem)
1	>FJ882951.1_1	UUUAAAAUCUGUGUAGCUGUCGCUCGGCUGCAUGCCUAGUGCACCUACGCAGUAUAAA	>FJ882951.1_1_miRNA_1	GUGUAGCUGUCGCUCGGCUGCA		>FJ882951.1_1_miRNA_2	CUAGUGCACCUACGCAGUAUAA
3	>FJ882951.1_7	GCCUUGUUCUUGGUGUCAACGAGAAAACACACGUCCAACUCAGUUUGCCUGUCCUUCAGGUUAGAGACGUGCUAGUGCGUGGCUUCGGGGACUCUGUGGAAGAGGC	>FJ882951.1_7_miRNA_1	UUUGCCUGUCCUUCAGGUUAGA		>FJ882951.1_7_miRNA_2	AGAGACGUGCUAGUGCGUGGCU	Hairpins	107
5	>FJ882951.1_8	GUCCUUCAGGUUAGAGACGUGCUAGUGCGUGGCUUCGGGGACUCUGUGGAAGAGGCCCUAUCGGAGGCACGUGAACACCUCAAAAAUGGC	>FJ882951.1_8_miRNA_1	CUAGUGCGUGGCUUCGGGGACU		>FJ882951.1_8_miRNA_2	GCCCUAUCGGAGGCACGUGAAC	Mature miRNA	214
7	>FJ882951.1_9	GAGGCACGUGAACACCUCAAAAAUGGCACUUGUGGUCUAGUAGAGCUGGAAAAAGGCGUACUGCCCCAGCUUGAACAGCCCUAUGUGUUCAUUAAACGUUCUGAUGCCUU	>FJ882951.1_9_miRNA_1	AAUGGCACUUGUGGUCUAGUAG		>FJ882951.1_9_miRNA_2	CAGCUUGAACAGCCCUAUGUGU	Uniq mature miRNA	198
9	>FJ882951.1_10	UAUCGGAGGCACGUGAACACCUCAAAAAUGGCACUUGUGGUCUAGUAGAGCUGGAAAAAGGCGUACUGCCCCAGCUUGAACAGCCCUAUGUGUUCAUUAAACGUUCUGAUG	>FJ882951.1_10_miRNA_1	AAUGGCACUUGUGGUCUAGUAG		>FJ882951.1_10_miRNA_2	CCCAGCUUGAACAGCCCUAUGU	Duplicate	16
11	>FJ882951.1_11	CUUGUGGUCUAGUAGAGCUGGAAAAAGGCGUACUGCCCCAGCUUGAACAGCCCUAUGUGUUCAUUAAACGUUCUGAUGCCUUAAGCACCAAUCACGGCCACAAG	>FJ882951.1_11_miRNA_1	CUUGAACAGCCCUAUGUGUUCA		>FJ882951.1_11_miRNA_2	UUAAGCACCAAUCACGGCCACA
15	>FJ882951.1_14	UACGGUCGUAGCGGUAUAACACUGGGAGUACUCGUGCCACAUGUGGGCGAAACCCCAAUUGCAUACCGCAAUGUUCUUCUUCGUA	>FJ882951.1_14_miRNA_1	UCGUGCCACAUGUGGGCGAAAC		>FJ882951.1_14_miRNA_2	AAACCCCAAUUGCAUACCGCAA
19	>FJ882951.1_17	AGGGAGCCGGUGGUCAUAGCUAUGGCAUCGAUCUAAAGUCUUAUGACUUAGGUGACGAGCUUGGCACUGAUCCCAUUGAAGAUUAUGAACAAAACUGGAACACU	>FJ882951.1_17_miRNA_1	AUCUAAAGUCUUAUGACUUAGG		>FJ882951.1_17_miRNA_2	AGGUGACGAGCUUGGCACUGAU
21	>FJ882951.1_19	GCAUGGCAGUGGUGCACUCCGUGAACUCACUCGUGAGCUCAAUGGAGGUGCAGUCACUCGCUAUGU	>FJ882951.1_19_miRNA_1	GCAGUGGUGCACUCCGUGAACU		>FJ882951.1_19_miRNA_2	UCAAUGGAGGUGCAGUCACUCG
25	>FJ882951.1_22	CGCGCGGGCAAGUCAAUGUGCACUCUUUCCGAACAACUUGAUUACAUCGAGUCGAAGAGAGGUGUCUACUGCUGCCGUG	>FJ882951.1_22_miRNA_1	AACUUGAUUACAUCGAGUCGAA		>FJ882951.1_22_miRNA_2	AAGAGAGGUGUCUACUGCUGCC
31	>FJ882951.1_32	AGCAUAGUGUUGCAGAUUAUCACAACCACUCAAACAUUGAAACUCGACUCCGCAAGGGAGGUAGGACUAGAUGUUUUGGAGGCUGUGUGUUUGCCUAUGUU	>FJ882951.1_32_miRNA_1	AUUAUCACAACCACUCAAACAU		>FJ882951.1_32_miRNA_2	UGGAGGCUGUGUGUUUGCCUAU
33	>FJ882951.1_38	GGCUGCUGGUGUUAUCAGAUCAAUUUUUGCGCGCACACUUGAUGCAGCAAACCACUCAAUUCCUGAUUUGCAAAGAGCAGCU	>FJ882951.1_38_miRNA_1	UGCGCGCACACUUGAUGCAGCA		>FJ882951.1_38_miRNA_2	AGCAAACCACUCAAUUCCUGAU
37	>FJ882951.1_44	GGUGGUCUUGUACAACAGACUUCUCAGUGGUUGUCUAAUCUUUUGGGCACUACUGUUGAAAAACUCAGGCCUAUCU	>FJ882951.1_44_miRNA_1	UGUCUAAUCUUUUGGGCACUAC		>FJ882951.1_44_miRNA_2	CACUACUGUUGAAAAACUCAGG
41	>FJ882951.1_52	GUGCAUUGAUCAAGUCACUAUCGCUGGCGCAAAGUUGCGAUCACUCAACUUAUGUGAAGUCUUCAUCGCUCAAAGCAAGGGACUUUACCGUCAGUGUAU	>FJ882951.1_52_miRNA_1	UAUCGCUGGCGCAAAGUUGCGA		>FJ882951.1_52_miRNA_2	CGAUCACUCAACUUAUGUGAAG
49	>FJ882951.1_58	GGCUACAAACAAUGUCUUUCGCUUAAAAGGGGGUGCACCAAUUAAAGGUGUAACCUUUGGAGAAGAUACUGUUUGGGAAGUU	>FJ882951.1_58_miRNA_1	AAUGUCUUUCGCUUAAAAGGGG		>FJ882951.1_58_miRNA_2	UGUAACCUUUGGAGAAGAUACU
51	>FJ882951.1_60	GUUGACAAAGUGCUUAAUGAAAAGUGCUCUGUCUACACUGUUGAAUCCGGUACCGAAGUUACUGAGUUUGCAUGUGUUGUAGCAGAGGCUGUUGUGAAGACUUUACAAC	>FJ882951.1_60_miRNA_1	CUGUCUACACUGUUGAAUCCGG		>FJ882951.1_60_miRNA_2	AGGCUGUUGUGAAGACUUUACA
55	>FJ882951.1_63	GGUGAAGAAAACUUUUCAUCACGUAUGUAUUGUUCCUUUUACCCUCCAGAUGAGGAAGAAGAGGACGAUGCAGAGUGUGAGGAAGAAGAAAUUGAUGAAACC	>FJ882951.1_63_miRNA_1	CGUAUGUAUUGUUCCUUUUACC		>FJ882951.1_63_miRNA_2	AAGAAGAGGACGAUGCAGAGUG
59	>FJ882951.1_65	CGGUACAGAGGAUGAUUAUCAAGGUCUCCCUCUGGAAUUUGGUGCCUCAGCUGAAACAGUUCGAGUUGAGGAAGAAGAAGAGGAAGACUGGCUGGAUGAUACUACUG	>FJ882951.1_65_miRNA_1	GAUGAUUAUCAAGGUCUCCCUC		>FJ882951.1_65_miRNA_2	AGUUGAGGAAGAAGAAGAGGAA
63	>FJ882951.1_68	GCACAAAGUGCUAAUCCUAUGGUGAUUGUAAAUGCUGCUAACAUACACCUGAAACAUGGUGGUGGUGUAGCAGGUGCACUCAACAAGGCAACCAAUGGUGC	>FJ882951.1_68_miRNA_1	UUGUAAAUGCUGCUAACAUACA		>FJ882951.1_68_miRNA_2	UGGUGGUGUAGCAGGUGCACUC
65	>FJ882951.1_69	CAUGCAAAAGGAGAGUGAUGAUUACAUUAAGCUAAAUGGCCCUCUUACAGUAGGAGGGUCUUGUUUGCUUUCUGGACAUAAUCUUGCUAAGAAGUGUCUGCAUG	>FJ882951.1_69_miRNA_1	UGGCCCUCUUACAGUAGGAGGG		>FJ882951.1_69_miRNA_2	UGCUUUCUGGACAUAAUCUUGC
69	>FJ882951.1_72	GGACAUCUUACUUGCACCAUUGUUGUCAGCAGGCAUAUUUGGUGCUAAACCACUUCAGUCUUUACAAGUGUGCGUGCAGACGGUUC	>FJ882951.1_72_miRNA_1	UUGUCAGCAGGCAUAUUUGGUG		>FJ882951.1_72_miRNA_2	UUUACAAGUGUGCGUGCAGACG
71	>FJ882951.1_74	GUACACAGGUUUAUAUUGCAGUCAAUGGCAAAGCUCUUUAUGAGCAGGUUGUCAUGGAUUAUCUUGAUAACCUGAAGC	>FJ882951.1_74_miRNA_1	UCAAUGGCAAAGCUCUUUAUGA		>FJ882951.1_74_miRNA_2	AGGUUGUCAUGGAUUAUCUUGA
73	>FJ882951.1_75	GCAAAGCUCUUUAUGAGCAGGUUGUCAUGGAUUAUCUUGAUAACCUGAAGCCUAGAGUGGAAGC	>FJ882951.1_75_miRNA_1	UGUCAUGGAUUAUCUUGAUAAC		>FJ882951.1_75_miRNA_2	AUAACCUGAAGCCUAGAGUGGA
79	>FJ882951.1_79	UUACCAUGAUUCUCAGAACAUGCUUAGAGGUGAAGAUAUGUCUUUCCUUGAGAAGGAUGCACCUUACAUGGUAGGUGAUGUUAUCACUAGUGGUGA	>FJ882951.1_79_miRNA_1	UCUUUCCUUGAGAAGGAUGCAC		>FJ882951.1_79_miRNA_2	AUGCACCUUACAUGGUAGGUGA
83	>FJ882951.1_83	AAGAGCUUUGAAGAAAGUGCCAGUUGAUGAGUAUAUAACCACGUACCCUGGACAAGGAUGUGCUGGUUAUACACUUGAGGAAGCUAAGACUGCUCUU	>FJ882951.1_83_miRNA_1	AGUUGAUGAGUAUAUAACCACG		>FJ882951.1_83_miRNA_2	AUGUGCUGGUUAUACACUUGAG
89	>FJ882951.1_91	AGCCUGUAGCUUCUAUUAUUACGAAGCUGAACUCUCUAAAUGAGCCGCUUGUCACAAUGCCAAUUGGUUAUGUGACACAUGGUUUUAAUCUUGAAGAGGCUGCGCGCU	>FJ882951.1_91_miRNA_1	UAAAUGAGCCGCUUGUCACAAU		>FJ882951.1_91_miRNA_2	UAUGUGACACAUGGUUUUAAUC
93	>FJ882951.1_95	GUCAGUAUCAUCACCAGAUGCUGUUACUACAUAUAAUGGAUACCUCACUUCGUCAUCAAAGACAUCUGAGGAGCACUUUGUAGAAACAGUUUCUUUGGCUGGC	>FJ882951.1_95_miRNA_1	AUCAUCACCAGAUGCUGUUACU		>FJ882951.1_95_miRNA_2	UAGAAACAGUUUCUUUGGCUGG
95	>FJ882951.1_96	AGUAUCAUCACCAGAUGCUGUUACUACAUAUAAUGGAUACCUCACUUCGUCAUCAAAGACAUCUGAGGAGCACUUUGUAGAAACAGUUUCUUUGGCUGGCUCU	>FJ882951.1_96_miRNA_1	AUCACCAGAUGCUGUUACUACA		>FJ882951.1_96_miRNA_2	UCUGAGGAGCACUUUGUAGAAA
103	>FJ882951.1_118	UAUCAGUGUGGUCAUUACACUCAUAUAACUGCUAAGGAGACCCUCUAUCGUAUUGACGGAGCUCACCUUACAAAGAUGUCAGAGUACAAAGGACCAGUGACUGAUG	>FJ882951.1_118_miRNA_1	AUAUAACUGCUAAGGAGACCCU		>FJ882951.1_118_miRNA_2	GCUCACCUUACAAAGAUGUCAG
107	>FJ882951.1_124	AGCUAUCUGUCACAUUCUUCCCAGACUUGAAUGGCGAUGUAGUGGCUAUUGACUAUAGACACUAUUCAGCGAGUUUCAAGAAAGGUGCUAAAUUACU	>FJ882951.1_124_miRNA_1	AGACUUGAAUGGCGAUGUAGUG		>FJ882951.1_124_miRNA_2	AGACACUAUUCAGCGAGUUUCA
111	>FJ882951.1_127	AAUUGUUUGGCACAUUAACCAGGCUACAACCAAGACAACGUUCAAACCAAACACUUGGUGUUUACGUUGUCUUUGGAGUACAAAGCCAGUAGAUACUUCAAAUUCAUU	>FJ882951.1_127_miRNA_1	AAGACAACGUUCAAACCAAACA		>FJ882951.1_127_miRNA_2	AAAGCCAGUAGAUACUUCAAAU
113	>FJ882951.1_128	UGUUUACGUUGUCUUUGGAGUACAAAGCCAGUAGAUACUUCAAAUUCAUUUGAAGUUCUGGCAGUAGAAGACACACAAGGAAUGGACA	>FJ882951.1_128_miRNA_1	CUUCAAAUUCAUUUGAAGUUCU		>FJ882951.1_128_miRNA_2	AGAAGACACACAAGGAAUGGAC
115	>FJ882951.1_136	CAAUUGCCACUCAUGGUAUUGCUGCAAUUAAUAGUGUUCCUUGGAGUAAAAUUUUGGCUUAUGUCAAACCAUUCUUAGGACAAGCAGCAAUUACAACAUCAAAUUG	>FJ882951.1_136_miRNA_1	AGUGUUCCUUGGAGUAAAAUUU		>FJ882951.1_136_miRNA_2	CCAUUCUUAGGACAAGCAGCAA
117	>FJ882951.1_137	UGCCACUCAUGGUAUUGCUGCAAUUAAUAGUGUUCCUUGGAGUAAAAUUUUGGCUUAUGUCAAACCAUUCUUAGGACAAGCAGCAAUUACAACAUCAAAUUGCG	>FJ882951.1_137_miRNA_1	UGCCACUCAUGGUAUUGCUGCA		>FJ882951.1_137_miRNA_2	CCAUUCUUAGGACAAGCAGCAA
123	>FJ882951.1_142	GGUGCUCCUUCUUAUUGUAAUGGCGUUAGAGAAUUGUAUCUUAAUUCGUCUAACGUUACUACUAUGGAUUUCUGUGAAGGUUCUUUUCC	>FJ882951.1_142_miRNA_1	UUAUUGUAAUGGCGUUAGAGAA		>FJ882951.1_142_miRNA_2	AUUCGUCUAACGUUACUACUAU
127	>FJ882951.1_149	GCUAUGUUCAUAUCAUGGAUGGUUGCACCUCUUCGACUUGCAUGAUGUGCUAUAAGCGCAAUCGUGCCACACGCGUUGAGUGUACAACUAUUGUUAAUGGC	>FJ882951.1_149_miRNA_1	UGAUGUGCUAUAAGCGCAAUCG		>FJ882951.1_149_miRNA_2	UUGAGUGUACAACUAUUGUUAA
129	>FJ882951.1_150	UAUGUUCAUAUCAUGGAUGGUUGCACCUCUUCGACUUGCAUGAUGUGCUAUAAGCGCAAUCGUGCCACACGCGUUGAGUGUACAACUAUUGUUAAUGGCAUG	>FJ882951.1_150_miRNA_1	UGAUGUGCUAUAAGCGCAAUCG		>FJ882951.1_150_miRNA_2	UUGAGUGUACAACUAUUGUUAA
137	>FJ882951.1_156	UGACCAGUCAUCGUAUAUUGUUGAUAGUGUUGCUGUGAAAAAUGGCGCGCUUCACCUCUACUUUGACAAGGCUGGUCA	>FJ882951.1_156_miRNA_1	UUGCUGUGAAAAAUGGCGCGCU		>FJ882951.1_156_miRNA_2	GGCGCGCUUCACCUCUACUUUG
145	>FJ882951.1_163	UAAGGCACUUGUUGCUACAGCUCACAGCGAGUUAGCAAAGGGUGUAGCUUUAGAUGGUGUCCUUUCUACAUUCGUGUCAGCUGCCCGACAAGGUGUUGUUGAUA	>FJ882951.1_163_miRNA_1	ACAGCGAGUUAGCAAAGGGUGU		>FJ882951.1_163_miRNA_2	UGUCCUUUCUACAUUCGUGUCA
147	>FJ882951.1_164	AGGGUGUAGCUUUAGAUGGUGUCCUUUCUACAUUCGUGUCAGCUGCCCGACAAGGUGUUGUUGAUACCGAUGUUGACACAAAGGAUGUUAUUGAAUGUCUCAAACUUU	>FJ882951.1_164_miRNA_1	GUCCUUUCUACAUUCGUGUCAG		>FJ882951.1_164_miRNA_2	UGUUGAUACCGAUGUUGACACA
149	>FJ882951.1_165	GCAAAGGGUGUAGCUUUAGAUGGUGUCCUUUCUACAUUCGUGUCAGCUGCCCGACAAGGUGUUGUUGAUACCGAUGUUGACACAAAGGAUGUUAUUGAAUGU	>FJ882951.1_165_miRNA_1	GUCCUUUCUACAUUCGUGUCAG		>FJ882951.1_165_miRNA_2	UGUUGAUACCGAUGUUGACACA
153	>FJ882951.1_172	GGUAAGAUUGUUAGUACUUGUUUUAAACUUAUGCUUAAGGCCACAUUAUUGUGCGUUCUUGCUGCAUUGGUUUGUUAUAUCGUUAUGCCAGUACAUACAUUGUCAAUC	>FJ882951.1_172_miRNA_1	AAGGCCACAUUAUUGUGCGUUC		>FJ882951.1_172_miRNA_2	UUCUUGCUGCAUUGGUUUGUUA
169	>FJ882951.1_186	AUAAUGAGCAUUACAGAGCUCUAUCAGGAGUUUUCUGUGGUGUUGAUGCGAUGAAUCUCAUAGCUAACAUCUUUACUCCUCUUGUGCAACCUGUGGGUGCUUUAGAUGU	>FJ882951.1_186_miRNA_1	CAUUACAGAGCUCUAUCAGGAG		>FJ882951.1_186_miRNA_2	AGCUAACAUCUUUACUCCUCUU
179	>FJ882951.1_198	UCAGUGGAGCCUUAGAUACUACCAGCUAUCGUGAAGCAGCUUGCUGCCACUUAGCAAAGGCUCUAAAUGA	>FJ882951.1_198_miRNA_1	CAGCUUGCUGCCACUUAGCAAA		>FJ882951.1_198_miRNA_2	CACUUAGCAAAGGCUCUAAAUG
183	>FJ882951.1_203	GCAAAGUUGAAGGGUGCAUGGUACAAGUAACCUGUGGAACUACAACUCUUAAUGGAUUGUGGUUGGAUGACACAGUAUACUGUCCAAGACAUGUCAUUUGC	>FJ882951.1_203_miRNA_1	AAGUAACCUGUGGAACUACAAC		>FJ882951.1_203_miRNA_2	AUACUGUCCAAGACAUGUCAUU
189	>FJ882951.1_212	AUCUGGUGUUUAUCAGUGUGCCAUGAGACCUAAUUAUACCAUUAAAGGUUCUUUCCUUAAUGGAUCAUGUGGUAGUGUUGGUUUUAACAUUGAUUAUGAUUGCGUGU	>FJ882951.1_212_miRNA_1	UAAUUAUACCAUUAAAGGUUCU		>FJ882951.1_212_miRNA_2	UGUGGUAGUGUUGGUUUUAACA
191	>FJ882951.1_215	AUUUGUUGACAGACAAACUGCACAGGCUGCAGGUACAGACACAACCAUAACAUUAAAUGUUUUGGCAUGGCUGUAUGCUGCUGUUAUCAAUGGUGAUAGGUGGUUUCUUAAUAGAU	>FJ882951.1_215_miRNA_1	UAACAUUAAAUGUUUUGGCAUG		>FJ882951.1_215_miRNA_2	UUGGCAUGGCUGUAUGCUGCUG
193	>FJ882951.1_220	UUAGAUAUGUGUGCUGCUUUGAAAGCGCUGCUGCAGAAUGGUAUGAAUGGUCGUACUAUCCUUGGUAGCACUAUUUUAGAAGAUGAGUUUACACCAUUUGA	>FJ882951.1_220_miRNA_1	UGAAUGGUCGUACUAUCCUUGG		>FJ882951.1_220_miRNA_2	UACUAUCCUUGGUAGCACUAUU
199	>FJ882951.1_226	GGUCUACAUGCCUGCUAGCUGGGUGAUGCGUAUCAUGACAUGGCUUGAAUUGGCUGACACUAGCUUGUCUGGUUAUAGGCU	>FJ882951.1_226_miRNA_1	UGCUAGCUGGGUGAUGCGUAUC		>FJ882951.1_226_miRNA_2	CACUAGCUUGUCUGGUUAUAGG
205	>FJ882951.1_236	UCAACCGUUACUUCAGGCUUACUCUUGGUGUUUAUGACUACUUGGUCUCUACACAAGAAUUUAGGUAUAUGAACUCCCAGGGGCUUUUGCCUCCUAAGAGUAGUAUUGA	>FJ882951.1_236_miRNA_1	AGGCUUACUCUUGGUGUUUAUG		>FJ882951.1_236_miRNA_2	UUUAGGUAUAUGAACUCCCAGG
207	>FJ882951.1_239	UUAAGUUGUUGGGUAUUGGAGGUAAACCAUGUAUCAAGGUUGCUACUGUACAGUCUAAAAUGUCUGACGUAAAGUGCACAUCUGUGGUACUGCUCUCGGUUCUUCAACAACUUAG	>FJ882951.1_239_miRNA_1	UAUCAAGGUUGCUACUGUACAG		>FJ882951.1_239_miRNA_2	CGUAAAGUGCACAUCUGUGGUA
213	>FJ882951.1_244	CUUCAGGCUAUUGCUUCAGAAUUUAGUUCUUUACCAUCAUAUGCCGCUUAUGCCACUGCCCAAGAGGCCUAUGAGCAGGCUGUAGCUAAUGGUGAUUCUGAAG	>FJ882951.1_244_miRNA_1	UACCAUCAUAUGCCGCUUAUGC		>FJ882951.1_244_miRNA_2	CCUAUGAGCAGGCUGUAGCUAA
215	>FJ882951.1_245	GGCUAUUGCUUCAGAAUUUAGUUCUUUACCAUCAUAUGCCGCUUAUGCCACUGCCCAAGAGGCCUAUGAGCAGGCUGUAGCUAAUGGUGAUUCUGAAGUCGUUCUC	>FJ882951.1_245_miRNA_1	UACCAUCAUAUGCCGCUUAUGC		>FJ882951.1_245_miRNA_2	AUGGUGAUUCUGAAGUCGUUCU
217	>FJ882951.1_246	GCUUCAGAAUUUAGUUCUUUACCAUCAUAUGCCGCUUAUGCCACUGCCCAAGAGGCCUAUGAGCAGGCUGUAGCUAAUGGUGAUUCUGAAGUCGUUCUCAAAAAGU	>FJ882951.1_246_miRNA_1	UACCAUCAUAUGCCGCUUAUGC		>FJ882951.1_246_miRNA_2	UAAUGGUGAUUCUGAAGUCGUU
219	>FJ882951.1_247	UGAGCAGGCUGUAGCUAAUGGUGAUUCUGAAGUCGUUCUCAAAAAGUUAAAGAAAUCUUUGAAUGUGGCUAAAUCUGAGUUUGACCGUGAUGCUGCCAUGCAACG	>FJ882951.1_247_miRNA_1	AUGGUGAUUCUGAAGUCGUUCU		>FJ882951.1_247_miRNA_2	UGAAUGUGGCUAAAUCUGAGUU
223	>FJ882951.1_261	UGUACUGAUGACAAUGCACUUGCCUACUAUAACAAUUCGAAGGGAGGUAGGUUUGUGCUGGCAUUACUAUCAGACCA	>FJ882951.1_261_miRNA_1	UUGCCUACUAUAACAAUUCGAA		>FJ882951.1_261_miRNA_2	UAGGUUUGUGCUGGCAUUACUA
229	>FJ882951.1_266	ACAGAAGUACCUGCCAAUUCAACUGUGCUUUCCUUCUGUGCUUUUGCAGUAGACCCUGCUAAAGCAUAUAAGGAUUACCUAGCAAGUGGAGGACAACCAAUCACCAACUGU	>FJ882951.1_266_miRNA_1	UGCUUUCCUUCUGUGCUUUUGC		>FJ882951.1_266_miRNA_2	CUAAAGCAUAUAAGGAUUACCU
231	>FJ882951.1_267	CACACUGGUACAGGACAGGCAAUUACUGUAACACCAGAAGCUAACAUGGACCAAGAGUCCUUUGGUGGUGCUUCAUGUUGUCUGUAUUGUAGAUGCCACAUUG	>FJ882951.1_267_miRNA_1	AUGGACCAAGAGUCCUUUGGUG		>FJ882951.1_267_miRNA_2	UGGUGGUGCUUCAUGUUGUCUG
235	>FJ882951.1_270	CAGUCUGUACCGUCUGCGGAAUGUGGAAAGGUUAUGGCUGUAGUUGUGACCAACUCCGCGAACCCUUGAUGCAGUCUG	>FJ882951.1_270_miRNA_1	AAAGGUUAUGGCUGUAGUUGUG		>FJ882951.1_270_miRNA_2	UGACCAACUCCGCGAACCCUUG
237	>FJ882951.1_271	GCUGUAGUUGUGACCAACUCCGCGAACCCUUGAUGCAGUCUGCGGAUGCAUCAACGUUUUUAAACGGGUUUGCGGUGUAAGUGCAGC	>FJ882951.1_271_miRNA_1	AACUCCGCGAACCCUUGAUGCA		>FJ882951.1_271_miRNA_2	CGGGUUUGCGGUGUAAGUGCAG
241	>FJ882951.1_276	AGCGGUUGCUGUCCAUGACUUUUUCAAGUUUAGAGUAGAUGGUGACAUGGUACCACAUAUAUCACGUCAGCGUCUAACUAAAUACACAAUGGCUGAUUUAGUCUAUGCU	>FJ882951.1_276_miRNA_1	UUUAGAGUAGAUGGUGACAUGG		>FJ882951.1_276_miRNA_2	CGUCAGCGUCUAACUAAAUACA
245	>FJ882951.1_280	GUAUGACUUCGUAGAGAAUCCUGACAUCUUACGCGUAUAUGCUAACUUAGGUGAGCGUGUACGCCAAUCAUUAUUAAAGACUGUACAAUUCUGCGAUGCUAUGC	>FJ882951.1_280_miRNA_1	UGCUAACUUAGGUGAGCGUGUA		>FJ882951.1_280_miRNA_2	ACUGUACAAUUCUGCGAUGCUA
247	>FJ882951.1_281	GUACGCCAAUCAUUAUUAAAGACUGUACAAUUCUGCGAUGCUAUGCGUGAUGCAGGCAUUGUAGGCGUAC	>FJ882951.1_281_miRNA_1	UGUACAAUUCUGCGAUGCUAUG		>FJ882951.1_281_miRNA_2	UGAUGCAGGCAUUGUAGGCGUA
249	>FJ882951.1_285	GAGUUCCUAUUGUGGAUUCAUAUUACUCAUUGCUGAUGCCCAUCCUCACUUUGAUUAGGGCAUUGGCUGCUGAGUCCCAUAUGGAUGCUGAUCUCGCAAAACCACUU	>FJ882951.1_285_miRNA_1	CCCAUCCUCACUUUGAUUAGGG		>FJ882951.1_285_miRNA_2	GGCAUUGGCUGCUGAGUCCCAU
251	>FJ882951.1_290	AACUUUUAGUGUAUGCUGCUGAUCCAGCUAUGCAUGCAGCUUCUGGCAAUUUAUUGCUAGAUAAACGCACUACAUGCUUUUCAGUAGCUGCACUAACAAACAAUGUU	>FJ882951.1_290_miRNA_1	UCUGGCAAUUUAUUGCUAGAUA		>FJ882951.1_290_miRNA_2	UACAUGCUUUUCAGUAGCUGCA
253	>FJ882951.1_291	GUUUCAAGGAACUUUUAGUGUAUGCUGCUGAUCCAGCUAUGCAUGCAGCUUCUGGCAAUUUAUUGCUAGAUAAACGCACUACAUGCUUUUCAGUAGCUGCACUAACAAAC	>FJ882951.1_291_miRNA_1	UCAAGGAACUUUUAGUGUAUGC		>FJ882951.1_291_miRNA_2	UACAUGCUUUUCAGUAGCUGCA
255	>FJ882951.1_295	AUGACUAUUAUCGUUAUAAUCUGCCAACAAUGUGUGAUAUCAGACAACUCCUAUUCGUAGUUGAAGUUGUUGAUAAAUACUUUGAUUGUUACGAUGGUGGCUGU	>FJ882951.1_295_miRNA_1	GAUAUCAGACAACUCCUAUUCG		>FJ882951.1_295_miRNA_2	UGAAGUUGUUGAUAAAUACUUU
257	>FJ882951.1_296	UAGUUGAAGUUGUUGAUAAAUACUUUGAUUGUUACGAUGGUGGCUGUAUUAAUGCCAACCAAGUAAUCGUUAACAAUCUGGAUAAAUCAGCUG	>FJ882951.1_296_miRNA_1	UUUGAUUGUUACGAUGGUGGCU		>FJ882951.1_296_miRNA_2	UAACAAUCUGGAUAAAUCAGCU
259	>FJ882951.1_297	AGUUGAAGUUGUUGAUAAAUACUUUGAUUGUUACGAUGGUGGCUGUAUUAAUGCCAACCAAGUAAUCGUUAACAAUCUGGAUAAAUCAGCUGGUUUCCCAUU	>FJ882951.1_297_miRNA_1	UUUGAUUGUUACGAUGGUGGCU		>FJ882951.1_297_miRNA_2	UAACAAUCUGGAUAAAUCAGCU
261	>FJ882951.1_298	UGCCAACCAAGUAAUCGUUAACAAUCUGGAUAAAUCAGCUGGUUUCCCAUUUAAUAAAUGGGGUAAGGCUAGACUUUAUUAUGACUCAAUGAGUUAUGAGGAUCA	>FJ882951.1_298_miRNA_1	UGGAUAAAUCAGCUGGUUUCCC		>FJ882951.1_298_miRNA_2	CUUUAUUAUGACUCAAUGAGUU
263	>FJ882951.1_299	GGCUAGACUUUAUUAUGACUCAAUGAGUUAUGAGGAUCAAGAUGCACUUUUCGCGUAUACUAAGCGUAAUGUCAUCCCUACUAUAACUCAAAUGAAUCUUAAGUAUGCC	>FJ882951.1_299_miRNA_1	CUCAAUGAGUUAUGAGGAUCAA		>FJ882951.1_299_miRNA_2	UGUCAUCCCUACUAUAACUCAA
267	>FJ882951.1_304	UGUUCUUGCUCGCAAACAUAACACUUGCUGUAACUUAUCACACCGUUUCUACAGGUUAGCUAACGAGUGUGCGCAAGUAUUAAGUGAGAUGGUCA	>FJ882951.1_304_miRNA_1	UGCUCGCAAACAUAACACUUGC		>FJ882951.1_304_miRNA_2	UAACGAGUGUGCGCAAGUAUUA
269	>FJ882951.1_305	UGCUCGCAAACAUAACACUUGCUGUAACUUAUCACACCGUUUCUACAGGUUAGCUAACGAGUGUGCGCAAGUAUUAAGUGAGAUGGUCAUGUGUGGCGGCUCA	>FJ882951.1_305_miRNA_1	CUUAUCACACCGUUUCUACAGG		>FJ882951.1_305_miRNA_2	UAACGAGUGUGCGCAAGUAUUA
277	>FJ882951.1_313	UAUAGAAAUAGGGAUGUUGAUCAUGAAUUCGUGGAUGAGUUUUACGCUUACCUGCGUAAACAUUUCUCCAUGAUGAUUCUUUCUGAUGAUGCCGUUGUGUGCUAUA	>FJ882951.1_313_miRNA_1	AUGAAUUCGUGGAUGAGUUUUA		>FJ882951.1_313_miRNA_2	UAAACAUUUCUCCAUGAUGAUU
287	>FJ882951.1_326	GGUACUGGGAACCUGAGUUUUAUGAGGCUAUGUACACACCACAUACAGUCUUGCAGGCUGUAGGUGUUUGUGUAUUGUGCAAUUCACAGACUUCACUUCGUUGCGGUGCC	>FJ882951.1_326_miRNA_1	UAUGAGGCUAUGUACACACCAC		>FJ882951.1_326_miRNA_2	UGUAGGUGUUUGUGUAUUGUGC
289	>FJ882951.1_327	GUUUGUGUAUUGUGCAAUUCACAGACUUCACUUCGUUGCGGUGCCUGUAUUAGGAGACCAUUCCUAUGUUGCAAGUGCUGCUAUGACCAUGUCAUUUCAACAUCACACAAAU	>FJ882951.1_327_miRNA_1	UAUUAGGAGACCAUUCCUAUGU		>FJ882951.1_327_miRNA_2	UGUUGCAAGUGCUGCUAUGACC
291	>FJ882951.1_328	ACAGACUUCACUUCGUUGCGGUGCCUGUAUUAGGAGACCAUUCCUAUGUUGCAAGUGCUGCUAUGACCAUGUCAUUUCAACAUCACACAAAUUAGUGUUGUCUGU	>FJ882951.1_328_miRNA_1	UAUUAGGAGACCAUUCCUAUGU		>FJ882951.1_328_miRNA_2	UGUUGCAAGUGCUGCUAUGACC
305	>FJ882951.1_341	GCAAAUUAUCAAAAGGUCGGCAUGCAAAAGUACUCUACACUCCAAGGACCACCUGGUACUGGUAAGAGUCAUUUUGCCAUCGGACUUGCUCUCUAUUACCCAUCUGC	>FJ882951.1_341_miRNA_1	AGGUCGGCAUGCAAAAGUACUC		>FJ882951.1_341_miRNA_2	UAAGAGUCAUUUUGCCAUCGGA
325	>FJ882951.1_363	CGUAGCCGGCUGUCAUGCAACUAGAGAUGCUGUGGGUACUAACCUACCUCUCCAGCUAGGAUUUUCUACAGGUGUUAACUUAGUAGCUGUACCGACUGGUUAUG	>FJ882951.1_363_miRNA_1	CAUGCAACUAGAGAUGCUGUGG		>FJ882951.1_363_miRNA_2	UUAGUAGCUGUACCGACUGGUU
333	>FJ882951.1_371	UACUUCAUCAGAUACUUAUGCCUGCUGGAAUCAUUCUGUGGGUUUUGACUAUGUCUAUAACCCAUUUAUGAUUGAUGUUCAGCAGUGGGGCUUUACGGGUAACCUUCAGAGUA	>FJ882951.1_371_miRNA_1	UGCUGGAAUCAUUCUGUGGGUU		>FJ882951.1_371_miRNA_2	UAACCCAUUUAUGAUUGAUGUU
335	>FJ882951.1_372	UACUUCAUCAGAUACUUAUGCCUGCUGGAAUCAUUCUGUGGGUUUUGACUAUGUCUAUAACCCAUUUAUGAUUGAUGUUCAGCAGUGGGGCUUUACGGGUA	>FJ882951.1_372_miRNA_1	UGCUGGAAUCAUUCUGUGGGUU		>FJ882951.1_372_miRNA_2	UAACCCAUUUAUGAUUGAUGUU
339	>FJ882951.1_374	UCAUGACUAGAUGUUUAGCAGUCCAUGAGUGCUUUGUUAAGCGCGUUGAUUGGUCUGUUGAAUACCCUAUUAUAGGAGAUGA	>FJ882951.1_374_miRNA_1	UAGAUGUUUAGCAGUCCAUGAG		>FJ882951.1_374_miRNA_2	UCUGUUGAAUACCCUAUUAUAG
343	>FJ882951.1_380	GAGUCUUGUCAAACUUGAACUUACCAGGCUGUGAUGGUGGUAGUUUGUAUGUGAAUAAGCAUGCAUUCCACACUCCAGCUUUCGAUAAAAGUGCAUUUACUAAUUU	>FJ882951.1_380_miRNA_1	UUUGUAUGUGAAUAAGCAUGCA		>FJ882951.1_380_miRNA_2	UGCAUUCCACACUCCAGCUUUC
355	>FJ882951.1_392	UCAAUAAUUUGGGUGUUGAUAUCGCUGCUAAUACUGUAAUCUGGGACUAUAAAAGAGAAGCCCCAGCACAUGUAUCUACAAUAGGUGUCUGCACAAUGACUGA	>FJ882951.1_392_miRNA_1	AUAUCGCUGCUAAUACUGUAAU		>FJ882951.1_392_miRNA_2	CCCCAGCACAUGUAUCUACAAU
357	>FJ882951.1_393	GGACUAUAAAAGAGAAGCCCCAGCACAUGUAUCUACAAUAGGUGUCUGCACAAUGACUGACAUUGCCAAGAAACCUACUGAGAGUGCUUGUUCUUCACUUACUGUCU	>FJ882951.1_393_miRNA_1	AUAGGUGUCUGCACAAUGACUG		>FJ882951.1_393_miRNA_2	CAAGAAACCUACUGAGAGUGCU
359	>FJ882951.1_394	CAUUGCCAAGAAACCUACUGAGAGUGCUUGUUCUUCACUUACUGUCUUGUUUGAUGGUAGAGUGGAAGGACAGGUAGACCUUUUUAGAAACGCCCGUAAUG	>FJ882951.1_394_miRNA_1	AGUGCUUGUUCUUCACUUACUG		>FJ882951.1_394_miRNA_2	UGGUAGAGUGGAAGGACAGGUA
369	>FJ882951.1_400	GACUUUCUCGAGCUCGCUAUGGAUGAAUUCAUACAGCGAUAUAAGCUCGAGGGCUAUGCCUUCGAACACAUCGUUUAUGGAGAUUUCAGUCAUGGACAACUUGGCGGUC	>FJ882951.1_400_miRNA_1	UCGAGGGCUAUGCCUUCGAACA		>FJ882951.1_400_miRNA_2	CGAACACAUCGUUUAUGGAGAU
371	>FJ882951.1_402	UAUGGACAGCACAGUGAAAAAUUACUUCAUAACAGAUGCGCAAACAGGUUCAUCAAAAUGUGUGUGUUCUGUGAUUGAUCUUUUACUUGAUGACUUUGUCGAGAUA	>FJ882951.1_402_miRNA_1	UUCAUAACAGAUGCGCAAACAG		>FJ882951.1_402_miRNA_2	UGUGUGUUCUGUGAUUGAUCUU
375	>FJ882951.1_408	ACUUAAAUACACUUACUUUAGCUGUACCCUACAACAUGAGAGUUAUUCACUUUGGUGCUGGCUCUGAUAAAGGAGUUGCACCAGGUACAGCUGUGCUCAGACAAUGGU	>FJ882951.1_408_miRNA_1	AGUUAUUCACUUUGGUGCUGGC		>FJ882951.1_408_miRNA_2	UUGCACCAGGUACAGCUGUGCU
389	>FJ882951.1_430	GGGUACACAGACACAUACUAUGAUAUUCGAUAAUGCAUUUAAUUGCACUUUCGAGUACAUAUCUGAUGCCU	>FJ882951.1_430_miRNA_1	UGAUAUUCGAUAAUGCAUUUAA		>FJ882951.1_430_miRNA_2	UUUCGAGUACAUAUCUGAUGCC
391	>FJ882951.1_444	UGCUGAUUAUAAUUAUAAAUUGCCAGAUGAUUUCAUGGGUUGUGUCCUUGCUUGGAAUACUAGGAACAUUGAUGCUACUUCAACUGGUAAUCAUAAUUAUAAAUAUAGGUA	>FJ882951.1_444_miRNA_1	UAUAAUUAUAAAUUGCCAGAUG		>FJ882951.1_444_miRNA_2	ACUUCAACUGGUAAUCAUAAUU
401	>FJ882951.1_455	CAGACUCAAGCAGGCUGUCUUAUAGGAGCUGAGCAUGUCGACACUUCUUAUGAGUGCGACAUUCCUAUUGGAGCUGGCAUUUG	>FJ882951.1_455_miRNA_1	ACACUUCUUAUGAGUGCGACAU		>FJ882951.1_455_miRNA_2	CGACAUUCCUAUUGGAGCUGGC
403	>FJ882951.1_456	GGCAUUUGUGCUAGUUACCAUACAGUUUCUUUAUUACGUAGUACUAGCCAAAAAUCUAUUGUGGCUUAUACUAUGUCUUUAGGUGCUGAUAGUUCAAUUGCU	>FJ882951.1_456_miRNA_1	UUUCUUUAUUACGUAGUACUAG		>FJ882951.1_456_miRNA_2	CUUAUACUAUGUCUUUAGGUGC
413	>FJ882951.1_466	GGACAUUUGGUGCUGGCGCUGCUCUUCAAAUACCUUUUGCUAUGCAAAUGGCAUAUAGGUUCAAUGGCAUUGGAGUUACCCAAAAUGUUC	>FJ882951.1_466_miRNA_1	CUGCUCUUCAAAUACCUUUUGC		>FJ882951.1_466_miRNA_2	CAUUGGAGUUACCCAAAAUGUU
419	>FJ882951.1_473	UGAGUGUGUUCUUGGACAAUCAAAAAGAGUUGACUUUUGUGGAAAGGGCUACCACCUUAUGUCCUUCCCACAAGCAGCCCCGCAUGGUGUUGUCUUCCUACAUGUCA	>FJ882951.1_473_miRNA_1	UGACUUUUGUGGAAAGGGCUAC		>FJ882951.1_473_miRNA_2	UCCCACAAGCAGCCCCGCAUGG
427	>FJ882951.1_486	CUUGCUUUGUUGCAUGACUAGUUGUUGCAGUUGCCUCAAGGGUGCAUGCUCUUGUGGUUCUUGCUGCAAGUUUGAUGAGGAUGACUCUGAGCCAG	>FJ882951.1_486_miRNA_1	UAGUUGUUGCAGUUGCCUCAAG		>FJ882951.1_486_miRNA_2	UCUUGUGGUUCUUGCUGCAAGU
429	>FJ882951.1_488	ACUCUGAGCCAGUUCUCAAGGGUGUCAAAUUACAUUACACAUAAACGAACUUAUGGAUUUGUUUAUGAGAUUUUUUACUCUUGGAUCAAUUACUGCACAGCCAGU	>FJ882951.1_488_miRNA_1	AAACGAACUUAUGGAUUUGUUU		>FJ882951.1_488_miRNA_2	UGUUUAUGAGAUUUUUUACUCU
431	>FJ882951.1_491	GCAACGAUACCGCUACAAGCCUCACUCCCUUUCGGAUGGCUUGUUAUUGGCGUUGC	>FJ882951.1_491_miRNA_1	UCACUCCCUUUCGGAUGGCUUG		>FJ882951.1_491_miRNA_2	CGGAUGGCUUGUUAUUGGCGUU
435	>FJ882951.1_497	UUUGUACCUCUAUGCCUUGAUAUAUUUUCUACAAUGCAUCAACGCAUGUAGAAUUAUUAUGAGAUGUUGGCUUUGUUGGAAGUGCAAA	>FJ882951.1_497_miRNA_1	ACAAUGCAUCAACGCAUGUAGA		>FJ882951.1_497_miRNA_2	AUGUAGAAUUAUUAUGAGAUGU
437	>FJ882951.1_500	GGUGACGGCAUUUCAACACCAAAACUCAAAGAAGACUACCAAAUUGGUGGUUAUUCUGAGGAUAGGCACUCAGGUGUUAAAGACUAUGUCGUUGUACAUGGCUAUUUCACC	>FJ882951.1_500_miRNA_1	GACUACCAAAUUGGUGGUUAUU		>FJ882951.1_500_miRNA_2	UCAGGUGUUAAAGACUAUGUCG
439	>FJ882951.1_505	UCGACGGCUCUUCAGGAGUUGCUAAUCCAGCAAUGGAUCCAAUUUAUGAUGUGCCGACGA	>FJ882951.1_505_miRNA_1	CUAAUCCAGCAAUGGAUCCAAU		>FJ882951.1_505_miRNA_2	UCCAAUUUAUGAUGUGCCGACG
445	>FJ882951.1_519	UUGGGUGACUGGCGGGAUUGCGAUUGCAAUGGCUUGUAUUGUAGGCUUGAUGUGGCUUAGCUACUUCGUUGCUUCCUUCAGGCUGUUUGCUCGUACCCGCUCAAUGUGGUCAUUCAA	>FJ882951.1_519_miRNA_1	UGAUGUGGCUUAGCUACUUCGU		>FJ882951.1_519_miRNA_2	UCAGGCUGUUUGCUCGUACCCG
449	>FJ882951.1_522	GUGACCAGACCGCUCAUGGAAAGUGAACUUGUCAUUGGUGCUGUGAUCAUUCGUGGUCACUUGCGAAUGGCCGGACACCCCCUAGGGCGCUGUGACAU	>FJ882951.1_522_miRNA_1	UGUGAUCAUUCGUGGUCACUUG		>FJ882951.1_522_miRNA_2	CUUGCGAAUGGCCGGACACCCC
479	>FJ882951.1_558	GGCAUCGUAUGGGUUGCAACUGAGGGAGCCUUGAAUACACCCAAAGACCACAUUGGCACCCGCAAUCCUAAUAACAAUGCU	>FJ882951.1_558_miRNA_1	UGGGUUGCAACUGAGGGAGCCU		>FJ882951.1_558_miRNA_2	ACCCGCAAUCCUAAUAACAAUG
481	>FJ882951.1_559	AUUGCCAAAAGGCUUCUACGCAGAGGGAAGCAGAGGCGGCAGUCAAGCCUCUUCUCGCUCCUCAUCACGUAGUCGCGGUAAU	>FJ882951.1_559_miRNA_1	UACGCAGAGGGAAGCAGAGGCG		>FJ882951.1_559_miRNA_2	UCUUCUCGCUCCUCAUCACGUA
489	>FJ882951.1_571	GAAAAAGACUGAUGAAGCUCAGCCUUUGCCGCAGAGACAAAAGAAGCAGCCCACUGUGACUCUUCUUCCUGCGGCUGACAUGGAUGAUUUCUCCAGACAACUUC	>FJ882951.1_571_miRNA_1	UGAAGCUCAGCCUUUGCCGCAG		>FJ882951.1_571_miRNA_2	CUGUGACUCUUCUUCCUGCGGC
491	>FJ882951.1_574	UCAUGAUGACCACACAAGGCAGAUGGGCUAUGUAAACGUUUUCGCAAUUCCGUUUACGAUACAUAGUCUACUCUUGUGCAGAAUGA	>FJ882951.1_574_miRNA_1	AGGCAGAUGGGCUAUGUAAACG		>FJ882951.1_574_miRNA_2	CAUAGUCUACUCUUGUGCAGAA
