# Supplementary material for: SARS-CoV-2 putative mi-RNAs may target host immune system and cellular mechanisms to mediate pathogenesis-an in silico and in vivo study
Source: Research Square preprint supplement (doi:10.21203/rs.3.rs-6526890/v1), 2025-05-09
Supplement: Supplementary file 2 [file 3530a621bf4e211f27bb78f2.xlsx]

## Sheet: MirDB
MT358637.1_8_miRNA_1		MT358637.1_8_miRNA_2		MT358637.1_12_miRNA_1		MT358637.1_12_miRNA_2		MT358637.1_13_miRNA_1		MT358637.1_13_miRNA_2		MT358637.1_16_miRNA_1		MT358637.1_16_miRNA_2		MT358637.1_18_miRNA_1		MT358637.1_18_miRNA_2		MT358637.1_26_miRNA_1		MT358637.1_26_miRNA_2		MT358637.1_29_miRNA_1		MT358637.1_29_miRNA_2		MT358637.1_30_miRNA_1		MT358637.1_30_miRNA_2		MT358637.1_31_miRNA_1		MT358637.1_31_miRNA_2		MT358637.1_37_miRNA_1		MT358637.1_37_miRNA_2		MT358637.1_43_miRNA_1		MT358637.1_43_miRNA_2		MT358637.1_46_miRNA_1		MT358637.1_46_miRNA_2		MT358637.1_56_miRNA_1
Gene Symbol	Gene Description	Gene Symbol	Gene Description	Gene Symbol	Gene Description	Gene Symbol	Gene Description	Gene Symbol	Gene Description	Gene Symbol	Gene Description	Gene Symbol	Gene Description	Gene Symbol	Gene Description	Gene Symbol	Gene Description	Gene Symbol	Gene Description	Gene Symbol	Gene Description	Gene Symbol	Gene Description	Gene Symbol	Gene Description	Gene Symbol	Gene Description	Gene Symbol	Gene Description	Gene Symbol	Gene Description	Gene Symbol	Gene Description	Gene Symbol	Gene Description	Gene Symbol	Gene Description	Gene Symbol	Gene Description	Gene Symbol	Gene Description	Gene Symbol	Gene Description	Gene Symbol	Gene Description	Gene Symbol	Gene Description	Gene Symbol	Gene Description
LRRN1	leucine rich repeat neuronal 1	ERG	ETS transcription factor ERG	ELAVL2	ELAV like RNA binding protein 2	ITPRID2	ITPR interacting domain containing 2	GABRA5	gamma-aminobutyric acid type A receptor alpha5 subunit	KLF12	Kruppel like factor 12	ANK1	ankyrin 1	ANK1	ankyrin 1	HIPK3	homeodomain interacting protein kinase 3	TMOD2	tropomodulin 2	REPS2	RALBP1 associated Eps domain containing 2	ITGB1	integrin subunit beta 1	DUSP5	dual specificity phosphatase 5	ANK3	ankyrin 3	KCNB1	potassium voltage-gated channel subfamily B member 1	CPNE4	copine 4	GUCY1A2	guanylate cyclase 1 soluble subunit alpha 2	UEVLD	UEV and lactate/malate dehyrogenase domains	BAHCC1	BAH domain and coiled-coil containing 1	KCNB1	potassium voltage-gated channel subfamily B member 1	NCOR1	nuclear receptor corepressor 1	WAC	WW domain containing adaptor with coiled-coil	NEXMIF	neurite extension and migration factor	POU2AF1	POU class 2 associating factor 1	ITCH	itchy E3 ubiquitin protein ligase
RAB6B	RAB6B, member RAS oncogene family			ESR1	estrogen receptor 1	MARK1	microtubule affinity regulating kinase 1	VAPA	VAMP associated protein A	VEZF1	vascular endothelial zinc finger 1	ARHGAP32	Rho GTPase activating protein 32	ARHGAP32	Rho GTPase activating protein 32	GRID2	glutamate ionotropic receptor delta type subunit 2	MAPK9	mitogen-activated protein kinase 9	PTPRB	protein tyrosine phosphatase, receptor type B	ELAVL2	ELAV like RNA binding protein 2	CST11	cystatin 11	TNRC6B	trinucleotide repeat containing 6B	PLXNA4	plexin A4	PAM	peptidylglycine alpha-amidating monooxygenase	CYP26B1	cytochrome P450 family 26 subfamily B member 1	NRSN1	neurensin 1	PLPPR4	phospholipid phosphatase related 4	PLXNA4	plexin A4	RNF145	ring finger protein 145	IL36B	interleukin 36 beta	SAR1B	secretion associated Ras related GTPase 1B	EHD2	EH domain containing 2	RFC1	replication factor C subunit 1
UBE2K	ubiquitin conjugating enzyme E2 K			JARID2	jumonji and AT-rich interaction domain containing 2	STAG2	stromal antigen 2	TUSC3	tumor suppressor candidate 3	PPIP5K1	diphosphoinositol pentakisphosphate kinase 1	CLVS1	clavesin 1	CLVS1	clavesin 1	WDR37	WD repeat domain 37	TJP1	tight junction protein 1	KCNK10	potassium two pore domain channel subfamily K member 10	FMR1	fragile X mental retardation 1	ADCY2	adenylate cyclase 2	CSTF2	cleavage stimulation factor subunit 2	PHTF2	putative homeodomain transcription factor 2	FAM168B	family with sequence similarity 168 member B	FBXO28	F-box protein 28	ABHD16A	abhydrolase domain containing 16A	HOXA9	homeobox A9	PHTF2	putative homeodomain transcription factor 2	SNAP25	synaptosome associated protein 25	CHRNA5	cholinergic receptor nicotinic alpha 5 subunit	ZC3H6	zinc finger CCCH-type containing 6	ADGRF2	adhesion G protein-coupled receptor F2	SELENOF	selenoprotein F
PBX1	PBX homeobox 1			ENOSF1	enolase superfamily member 1	CREB5	cAMP responsive element binding protein 5	MEF2C	myocyte enhancer factor 2C	ACTR8	ARP8 actin related protein 8 homolog	VSTM2L	V-set and transmembrane domain containing 2 like	VSTM2L	V-set and transmembrane domain containing 2 like	ANK2	ankyrin 2	ITPR3	inositol 1,4,5-trisphosphate receptor type 3	ZNF781	zinc finger protein 781	SOAT1	sterol O-acyltransferase 1	BCOR	BCL6 corepressor	BORCS7	BLOC-1 related complex subunit 7	GPN3	GPN-loop GTPase 3	PRDM2	PR/SET domain 2	HCN1	hyperpolarization activated cyclic nucleotide gated potassium channel 1	HAL	histidine ammonia-lyase	SESTD1	SEC14 and spectrin domain containing 1	GPN3	GPN-loop GTPase 3	RBM24	RNA binding motif protein 24	PRR11	proline rich 11	TMEM106B	transmembrane protein 106B	PNMA2	PNMA family member 2	ZNF891	zinc finger protein 891
CNTF	ciliary neurotrophic factor			RPS6KA3	ribosomal protein S6 kinase A3	RETREG1	reticulophagy regulator 1	ZNF664	zinc finger protein 664	VIM	vimentin	THRB	thyroid hormone receptor beta	THRB	thyroid hormone receptor beta	PITPNC1	phosphatidylinositol transfer protein cytoplasmic 1	MAPRE2	microtubule associated protein RP/EB family member 2	ZNF773	zinc finger protein 773	QSER1	glutamine and serine rich 1	RMND5A	required for meiotic nuclear division 5 homolog A	INPP4B	inositol polyphosphate-4-phosphatase type II B	MSI2	musashi RNA binding protein 2	TLR3	toll like receptor 3	NKD1	NKD1, WNT signaling pathway inhibitor	DGKE	diacylglycerol kinase epsilon	PHIP	pleckstrin homology domain interacting protein	OGT	O-linked N-acetylglucosamine (GlcNAc) transferase	ITM2B	integral membrane protein 2B	BIRC6	baculoviral IAP repeat containing 6	BTG3	BTG anti-proliferation factor 3	MPRIP	myosin phosphatase Rho interacting protein	MTDH	metadherin
BZW1	basic leucine zipper and W2 domains 1			PLIN1	perilipin 1	IFT80	intraflagellar transport 80	IARS2	isoleucyl-tRNA synthetase 2, mitochondrial	ACVR2B	activin A receptor type 2B	RMND5A	required for meiotic nuclear division 5 homolog A	RMND5A	required for meiotic nuclear division 5 homolog A	AP2B1	adaptor related protein complex 2 subunit beta 1	PLCD1	phospholipase C delta 1	TFCP2	transcription factor CP2	CLGN	calmegin	SORT1	sortilin 1	SELENOF	selenoprotein F	OGT	O-linked N-acetylglucosamine (GlcNAc) transferase	PTPRT	protein tyrosine phosphatase, receptor type T	CPEB3	cytoplasmic polyadenylation element binding protein 3	INHBB	inhibin subunit beta B	CCNJ	cyclin J	ADAMTSL5	ADAMTS like 5	PDLIM5	PDZ and LIM domain 5	BMP7	bone morphogenetic protein 7	BECN1	beclin 1	RTKN2	rhotekin 2	PCF11	PCF11, cleavage and polyadenylation factor subunit
CEP85L	centrosomal protein 85 like			RERE	arginine-glutamic acid dipeptide repeats	ZNF548	zinc finger protein 548	JADE2	jade family PHD finger 2	AGO4	argonaute RISC catalytic component 4	UPF2	UPF2, regulator of nonsense mediated mRNA decay	UPF2	UPF2, regulator of nonsense mediated mRNA decay	ANKRD40	ankyrin repeat domain 40	HSPA13	heat shock protein family A (Hsp70) member 13	RIT1	Ras like without CAAX 1	C2orf49	chromosome 2 open reading frame 49	UBE2D1	ubiquitin conjugating enzyme E2 D1	STXBP3	syntaxin binding protein 3	ADAMTSL5	ADAMTS like 5	TPR	translocated promoter region, nuclear basket protein	CHSY3	chondroitin sulfate synthase 3	CEP170	centrosomal protein 170	SELENOI	selenoprotein I	SLC36A3	solute carrier family 36 member 3	RELT	RELT, TNF receptor	UBL3	ubiquitin like 3	SVBP	small vasohibin binding protein	ACKR2	atypical chemokine receptor 2	AIMP1	aminoacyl tRNA synthetase complex interacting multifunctional protein 1
IRAK1BP1	interleukin 1 receptor associated kinase 1 binding protein 1			BEST3	bestrophin 3	ZRANB3	zinc finger RANBP2-type containing 3	TRPM3	transient receptor potential cation channel subfamily M member 3	FRMD5	FERM domain containing 5	KLF11	Kruppel like factor 11	KLF11	Kruppel like factor 11	CDC42BPA	CDC42 binding protein kinase alpha	BNC2	basonuclin 2	SPRED1	sprouty related EVH1 domain containing 1	FEM1C	fem-1 homolog C	POLR2C	RNA polymerase II subunit C	FLRT3	fibronectin leucine rich transmembrane protein 3	SLC36A3	solute carrier family 36 member 3	ARHGEF38	Rho guanine nucleotide exchange factor 38	MINDY2	MINDY lysine 48 deubiquitinase 2	DDX6	DEAD-box helicase 6	CCDC146	coiled-coil domain containing 146	MSI2	musashi RNA binding protein 2	MYOZ2	myozenin 2	GNRH1	gonadotropin releasing hormone 1	C2orf49	chromosome 2 open reading frame 49	C9orf152	chromosome 9 open reading frame 152	PUS7L	pseudouridine synthase 7 like
GBP7	guanylate binding protein 7			PAK3	p21 (RAC1) activated kinase 3	LRRCC1	leucine rich repeat and coiled-coil centrosomal protein 1	LRRTM4	leucine rich repeat transmembrane neuronal 4	CASP3	caspase 3	CNOT6L	CCR4-NOT transcription complex subunit 6 like	CNOT6L	CCR4-NOT transcription complex subunit 6 like	ITM2A	integral membrane protein 2A	CASTOR2	cytosolic arginine sensor for mTORC1 subunit 2	CXXC4	CXXC finger protein 4	PHLDB2	pleckstrin homology like domain family B member 2	TOX3	TOX high mobility group box family member 3	C2orf73	chromosome 2 open reading frame 73	CKS1B	CDC28 protein kinase regulatory subunit 1B	IRX4	iroquois homeobox 4	BCL11A	BCL11A, BAF complex component	ATXN1	ataxin 1	G2E3	G2/M-phase specific E3 ubiquitin protein ligase	CKS1B	CDC28 protein kinase regulatory subunit 1B	SLC44A1	solute carrier family 44 member 1	BBS5	Bardet-Biedl syndrome 5	ABHD18	abhydrolase domain containing 18	PDP2	pyruvate dehyrogenase phosphatase catalytic subunit 2	CHD4	chromodomain helicase DNA binding protein 4
RAB1A	RAB1A, member RAS oncogene family			ARID2	AT-rich interaction domain 2	EYA1	EYA transcriptional coactivator and phosphatase 1	C7orf57	chromosome 7 open reading frame 57	KLF11	Kruppel like factor 11	RARA	retinoic acid receptor alpha	RARA	retinoic acid receptor alpha	NAV1	neuron navigator 1	ZCCHC8	zinc finger CCHC-type containing 8	ZNF189	zinc finger protein 189	ANP32E	acidic nuclear phosphoprotein 32 family member E	GPATCH11	G-patch domain containing 11	SEC23A	Sec23 homolog A, coat complex II component	UPF2	UPF2, regulator of nonsense mediated mRNA decay	CLCN4	chloride voltage-gated channel 4	NRXN3	neurexin 3	TTC3	tetratricopeptide repeat domain 3	RRP15	ribosomal RNA processing 15 homolog	UPF2	UPF2, regulator of nonsense mediated mRNA decay	CCDC189	coiled-coil domain containing 189	ILDR1	immunoglobulin like domain containing receptor 1	SUSD5	sushi domain containing 5	UBQLN2	ubiquilin 2	LIN9	lin-9 DREAM MuvB core complex component
MBNL1	muscleblind like splicing regulator 1			OSBPL10	oxysterol binding protein like 10	SPCS3	signal peptidase complex subunit 3	FBXW2	F-box and WD repeat domain containing 2	SCRN1	secernin 1	L3MBTL3	L3MBTL3, histone methyl-lysine binding protein	L3MBTL3	L3MBTL3, histone methyl-lysine binding protein	PCDHGA12	protocadherin gamma subfamily A, 12	SPO11	SPO11, initiator of meiotic double stranded breaks	DAG1	dystroglycan 1	KLHL9	kelch like family member 9	TSC22D2	TSC22 domain family member 2	PHC3	polyhomeotic homolog 3	ZBTB39	zinc finger and BTB domain containing 39	RSBN1	round spermatid basic protein 1	COL5A1	collagen type V alpha 1 chain	ABCG4	ATP binding cassette subfamily G member 4	NOVA1	NOVA alternative splicing regulator 1	ZBTB39	zinc finger and BTB domain containing 39	B4GALT4	beta-1,4-galactosyltransferase 4	CYP20A1	cytochrome P450 family 20 subfamily A member 1	EXOC5	exocyst complex component 5	LENG8	leukocyte receptor cluster member 8	NFKBIA	NFKB inhibitor alpha
PIAS2	protein inhibitor of activated STAT 2			LYRM4	LYR motif containing 4	DNM3	dynamin 3	IQCK	IQ motif containing K	RB1CC1	RB1 inducible coiled-coil 1	CLN5	CLN5, intracellular trafficking protein	CLN5	CLN5, intracellular trafficking protein	DDO	D-aspartate oxidase	ZCCHC14	zinc finger CCHC-type containing 14	EDIL3	EGF like repeats and discoidin domains 3	ZKSCAN1	zinc finger with KRAB and SCAN domains 1	CHD1	chromodomain helicase DNA binding protein 1	MEF2A	myocyte enhancer factor 2A	APLP2	amyloid beta precursor like protein 2	CRYZL1	crystallin zeta like 1	ARHGAP5	Rho GTPase activating protein 5	TMEM165	transmembrane protein 165	IPO7	importin 7	APLP2	amyloid beta precursor like protein 2	ZNF704	zinc finger protein 704	APOPT1	apoptogenic 1, mitochondrial	SS18	SS18, nBAF chromatin remodeling complex subunit	TAL1	TAL bHLH transcription factor 1, erythroid differentiation factor	JPH1	junctophilin 1
PPM1A	protein phosphatase, Mg2+/Mn2+ dependent 1A			HEPACAM	hepatic and glial cell adhesion molecule	GPC6	glypican 6	MEDAG	mesenteric estrogen dependent adipogenesis	SIM1	SIM bHLH transcription factor 1	KMT5B	lysine methyltransferase 5B	KMT5B	lysine methyltransferase 5B	NRN1	neuritin 1	DDHD1	DDHD domain containing 1	MYCBP	MYC binding protein	PGGT1B	protein geranylgeranyltransferase type I subunit beta	INO80D	INO80 complex subunit D	STRBP	spermatid perinuclear RNA binding protein	ADIPOR2	adiponectin receptor 2	GRK5	G protein-coupled receptor kinase 5	NDFIP2	Nedd4 family interacting protein 2	NOL6	nucleolar protein 6	ZNF746	zinc finger protein 746	ADIPOR2	adiponectin receptor 2	VSNL1	visinin like 1	PPP6R3	protein phosphatase 6 regulatory subunit 3	MAPRE1	microtubule associated protein RP/EB family member 1	TNR	tenascin R	SLCO5A1	solute carrier organic anion transporter family member 5A1
FAXC	failed axon connections homolog			PROSER1	proline and serine rich 1	FUT9	fucosyltransferase 9	MTRNR2L1	MT-RNR2 like 1	LAPTM4A	lysosomal protein transmembrane 4 alpha	NPPC	natriuretic peptide C	NPPC	natriuretic peptide C	CUEDC1	CUE domain containing 1	SATB1	SATB homeobox 1	QRICH1	glutamine rich 1	COL10A1	collagen type X alpha 1 chain	GUCY1A2	guanylate cyclase 1 soluble subunit alpha 2	CARF	calcium responsive transcription factor	ZNF474	zinc finger protein 474	MAIP1	matrix AAA peptidase interacting protein 1	DNAH14	dynein axonemal heavy chain 14	GFRA1	GDNF family receptor alpha 1	ZNF678	zinc finger protein 678	ZNF474	zinc finger protein 474	UGGT1	UDP-glucose glycoprotein glucosyltransferase 1	MIGA1	mitoguardin 1	TMEM33	transmembrane protein 33	RANBP10	RAN binding protein 10	RABGAP1	RAB GTPase activating protein 1
HOXA11	homeobox A11			PATZ1	POZ/BTB and AT hook containing zinc finger 1	SHISA7	shisa family member 7			DEK	DEK proto-oncogene	SOGA1	suppressor of glucose, autophagy associated 1	SOGA1	suppressor of glucose, autophagy associated 1	SSR1	signal sequence receptor subunit 1	RGS7	regulator of G protein signaling 7	ZNF559	zinc finger protein 559	PDP1	pyruvate dehyrogenase phosphatase catalytic subunit 1	MARK3	microtubule affinity regulating kinase 3	ASB15	ankyrin repeat and SOCS box containing 15	CNKSR3	CNKSR family member 3	RPS6KA3	ribosomal protein S6 kinase A3	UBE2N	ubiquitin conjugating enzyme E2 N	LIMCH1	LIM and calponin homology domains 1	PPP4R4	protein phosphatase 4 regulatory subunit 4	GPI	glucose-6-phosphate isomerase	HIPK3	homeodomain interacting protein kinase 3	BCAS1	breast carcinoma amplified sequence 1	RPS6KA2	ribosomal protein S6 kinase A2	SHISA9	shisa family member 9	NAMPT	nicotinamide phosphoribosyltransferase
L1CAM	L1 cell adhesion molecule			BAALC	BAALC, MAP3K1 and KLF4 binding	SNX30	sorting nexin family member 30			RIMS2	regulating synaptic membrane exocytosis 2	DESI2	desumoylating isopeptidase 2	DESI2	desumoylating isopeptidase 2	PCDHGC3	protocadherin gamma subfamily C, 3	CDC42EP3	CDC42 effector protein 3	CCDC85C	coiled-coil domain containing 85C	CHD7	chromodomain helicase DNA binding protein 7	JADE1	jade family PHD finger 1	ARMC10	armadillo repeat containing 10	ST3GAL1	ST3 beta-galactoside alpha-2,3-sialyltransferase 1	TDRP	testis development related protein	ATAD1	ATPase family, AAA domain containing 1	SCAI	suppressor of cancer cell invasion	IL22	interleukin 22	CNKSR3	CNKSR family member 3	ARFGEF3	ARFGEF family member 3	ANLN	anillin actin binding protein	FAM129A	family with sequence similarity 129 member A	HTR2C	5-hydroxytryptamine receptor 2C	IRX2	iroquois homeobox 2
ALS2	ALS2, alsin Rho guanine nucleotide exchange factor			BTC	betacellulin	SH3YL1	SH3 and SYLF domain containing 1			L3MBTL3	L3MBTL3, histone methyl-lysine binding protein	FOXC1	forkhead box C1	FOXC1	forkhead box C1	PCDHGA11	protocadherin gamma subfamily A, 11	ORC3	origin recognition complex subunit 3	PLEKHH1	pleckstrin homology, MyTH4 and FERM domain containing H1	GPATCH8	G-patch domain containing 8	COL19A1	collagen type XIX alpha 1 chain	TRAK1	trafficking kinesin protein 1	CLDN12	claudin 12	TMEM37	transmembrane protein 37	INPP5F	inositol polyphosphate-5-phosphatase F	SLC39A10	solute carrier family 39 member 10	NOTCH1	notch 1	CLDN12	claudin 12	CXCL11	C-X-C motif chemokine ligand 11	ZNF280D	zinc finger protein 280D	ANKS1B	ankyrin repeat and sterile alpha motif domain containing 1B	ELK4	ELK4, ETS transcription factor	LUC7L3	LUC7 like 3 pre-mRNA splicing factor
SULF2	sulfatase 2			GPR158	G protein-coupled receptor 158	PPT1	palmitoyl-protein thioesterase 1			PARP8	poly(ADP-ribose) polymerase family member 8	AMMECR1	Alport syndrome, mental retardation, midface hypoplasia and elliptocytosis chromosomal region gene 1	AMMECR1	Alport syndrome, mental retardation, midface hypoplasia and elliptocytosis chromosomal region gene 1	PCDHGA8	protocadherin gamma subfamily A, 8	ADCK1	aarF domain containing kinase 1	ZNF814	zinc finger protein 814	EPHA6	EPH receptor A6	CRKL	CRK like proto-oncogene, adaptor protein	MEIS2	Meis homeobox 2	POLE	DNA polymerase epsilon, catalytic subunit	PTPRN2	protein tyrosine phosphatase, receptor type N2	PORCN	porcupine O-acyltransferase	OTUD3	OTU deubiquitinase 3	TPR	translocated promoter region, nuclear basket protein	POLE	DNA polymerase epsilon, catalytic subunit	KIF1B	kinesin family member 1B	EPS15	epidermal growth factor receptor pathway substrate 15	MAP3K1	mitogen-activated protein kinase kinase kinase 1	PARP11	poly(ADP-ribose) polymerase family member 11	FAM243A	family with sequence similarity 243 member A
KANSL1L	KAT8 regulatory NSL complex subunit 1 like			MAPK8	mitogen-activated protein kinase 8	NMD3	NMD3 ribosome export adaptor			CLOCK	clock circadian regulator	AGO1	argonaute RISC catalytic component 1	AGO1	argonaute RISC catalytic component 1	PCDHGB3	protocadherin gamma subfamily B, 3	TAF5	TATA-box binding protein associated factor 5	MEIS2	Meis homeobox 2	TMEM65	transmembrane protein 65	KBTBD8	kelch repeat and BTB domain containing 8	DCP2	decapping mRNA 2	GPI	glucose-6-phosphate isomerase	LRRC49	leucine rich repeat containing 49	PAPPA	pappalysin 1	COPB1	coatomer protein complex subunit beta 1	GOLGA2	golgin A2	PPARGC1A	PPARG coactivator 1 alpha	ATG7	autophagy related 7	C8orf34	chromosome 8 open reading frame 34	NGRN	neugrin, neurite outgrowth associated	CALCA	calcitonin related polypeptide alpha	C1orf94	chromosome 1 open reading frame 94
FAM114A1	family with sequence similarity 114 member A1			CMKLR1	chemerin chemokine-like receptor 1	ZBTB41	zinc finger and BTB domain containing 41			KDM5A	lysine demethylase 5A	PLXNB2	plexin B2	PLXNB2	plexin B2	PCDHGA9	protocadherin gamma subfamily A, 9	ZBTB34	zinc finger and BTB domain containing 34	TIPARP	TCDD inducible poly(ADP-ribose) polymerase	NKTR	natural killer cell triggering receptor	PDZRN3	PDZ domain containing ring finger 3	USP47	ubiquitin specific peptidase 47	PPARGC1A	PPARG coactivator 1 alpha	BNIP2	BCL2 interacting protein 2	NFAT5	nuclear factor of activated T cells 5	GOT2	glutamic-oxaloacetic transaminase 2	KALRN	kalirin RhoGEF kinase	TMEM99	transmembrane protein 99	HMGN1	high mobility group nucleosome binding domain 1	GCSAML	germinal center associated signaling and motility like	STK4	serine/threonine kinase 4	ADIPOQ	adiponectin, C1Q and collagen domain containing	CRIM1	cysteine rich transmembrane BMP regulator 1
DSG3	desmoglein 3			DAPL1	death associated protein like 1	SLC18A2	solute carrier family 18 member A2			ARHGAP6	Rho GTPase activating protein 6	NFIX	nuclear factor I X	NFIX	nuclear factor I X	PCDHGA7	protocadherin gamma subfamily A, 7	LRRC8A	leucine rich repeat containing 8 VRAC subunit A	KIF21A	kinesin family member 21A	GPBP1L1	GC-rich promoter binding protein 1 like 1	FLVCR2	feline leukemia virus subgroup C cellular receptor family member 2	KMT2C	lysine methyltransferase 2C	TMEM99	transmembrane protein 99	KLF6	Kruppel like factor 6	KIAA1143	KIAA1143	RSU1	Ras suppressor protein 1	ZBTB43	zinc finger and BTB domain containing 43	CERS6	ceramide synthase 6	NDST3	N-deacetylase and N-sulfotransferase 3	GPM6A	glycoprotein M6A	CSK	C-terminal Src kinase	GID4	GID complex subunit 4 homolog	CELF2	CUGBP Elav-like family member 2
CDH13	cadherin 13			VGLL4	vestigial like family member 4	FRS2	fibroblast growth factor receptor substrate 2			STAG1	stromal antigen 1	TMOD2	tropomodulin 2	TMOD2	tropomodulin 2	PCDHGA5	protocadherin gamma subfamily A, 5	SKA1	spindle and kinetochore associated complex subunit 1	EXOC1	exocyst complex component 1	BCL7A	BCL7A, BAF complex component	BPTF	bromodomain PHD finger transcription factor	DNAJB7	DnaJ heat shock protein family (Hsp40) member B7	RBM4B	RNA binding motif protein 4B	RAB21	RAB21, member RAS oncogene family	CADM2	cell adhesion molecule 2	FZD7	frizzled class receptor 7	ZNF780B	zinc finger protein 780B	RBM4B	RNA binding motif protein 4B	SLC6A13	solute carrier family 6 member 13	TNRC18	trinucleotide repeat containing 18	SH3BGRL2	SH3 domain binding glutamate rich protein like 2	TMED4	transmembrane p24 trafficking protein 4	PCDHB5	protocadherin beta 5
CPSF7	cleavage and polyadenylation specific factor 7			ZNF74	zinc finger protein 74	GBE1	1,4-alpha-glucan branching enzyme 1			DLK1	delta like non-canonical Notch ligand 1	USP10	ubiquitin specific peptidase 10	USP10	ubiquitin specific peptidase 10	PCDHGA3	protocadherin gamma subfamily A, 3	PAN2	poly(A) specific ribonuclease subunit PAN2	ROCK2	Rho associated coiled-coil containing protein kinase 2	SBSPON	somatomedin B and thrombospondin type 1 domain containing	APOBEC4	apolipoprotein B mRNA editing enzyme catalytic polypeptide like 4	FAM122C	family with sequence similarity 122C	RPRD2	regulation of nuclear pre-mRNA domain containing 2	GP6	glycoprotein VI platelet	ANTXR1	ANTXR cell adhesion molecule 1	CA8	carbonic anhydrase 8	BCAP29	B cell receptor associated protein 29	RPRD2	regulation of nuclear pre-mRNA domain containing 2	ARHGEF6	Rac/Cdc42 guanine nucleotide exchange factor 6	STRN3	striatin 3	FAR2	fatty acyl-CoA reductase 2	LSAMP	limbic system associated membrane protein	ETS1	ETS proto-oncogene 1, transcription factor
LIPH	lipase H			FOS	Fos proto-oncogene, AP-1 transcription factor subunit	CDC7	cell division cycle 7			RNF38	ring finger protein 38	SIN3A	SIN3 transcription regulator family member A	SIN3A	SIN3 transcription regulator family member A	PCDHGA2	protocadherin gamma subfamily A, 2	SATB2	SATB homeobox 2	KLF4	Kruppel like factor 4	H3F3B	H3 histone family member 3B	SUSD5	sushi domain containing 5	FMR1	fragile X mental retardation 1	DNAJC5G	DnaJ heat shock protein family (Hsp40) member C5 gamma	CD274	CD274 molecule	APOL6	apolipoprotein L6	TTC17	tetratricopeptide repeat domain 17	RASAL2	RAS protein activator like 2	DNAJC5G	DnaJ heat shock protein family (Hsp40) member C5 gamma	GALNT1	polypeptide N-acetylgalactosaminyltransferase 1	GTF2F2	general transcription factor IIF subunit 2	BCLAF3	BCLAF1 and THRAP3 family member 3	RAB6B	RAB6B, member RAS oncogene family	KDM7A	lysine demethylase 7A
PDZRN3	PDZ domain containing ring finger 3			SHE	Src homology 2 domain containing E	HNRNPA0	heterogeneous nuclear ribonucleoprotein A0			GPHN	gephyrin	ST6GALNAC4	ST6 N-acetylgalactosaminide alpha-2,6-sialyltransferase 4	ST6GALNAC4	ST6 N-acetylgalactosaminide alpha-2,6-sialyltransferase 4	PCDHGA10	protocadherin gamma subfamily A, 10	F5	coagulation factor V	CASZ1	castor zinc finger 1	KIF1B	kinesin family member 1B	SDR39U1	short chain dehydrogenase/reductase family 39U member 1	ARFIP1	ADP ribosylation factor interacting protein 1	STX5	syntaxin 5	ZNF805	zinc finger protein 805	FAM200B	family with sequence similarity 200 member B	TNFSF13B	TNF superfamily member 13b	CASP7	caspase 7	STX5	syntaxin 5	NOX4	NADPH oxidase 4	CARMIL1	capping protein regulator and myosin 1 linker 1	PARG	poly(ADP-ribose) glycohydrolase	C11orf87	chromosome 11 open reading frame 87	GART	phosphoribosylglycinamide formyltransferase, phosphoribosylglycinamide synthetase, phosphoribosylaminoimidazole synthetase
SUZ12	SUZ12, polycomb repressive complex 2 subunit			CNOT8	CCR4-NOT transcription complex subunit 8	BRWD3	bromodomain and WD repeat domain containing 3			DESI2	desumoylating isopeptidase 2	ATP11C	ATPase phospholipid transporting 11C	ATP11C	ATPase phospholipid transporting 11C	PCDHGA1	protocadherin gamma subfamily A, 1	CMTR2	cap methyltransferase 2	NCAM1	neural cell adhesion molecule 1	NTNG1	netrin G1	MEGF11	multiple EGF like domains 11	SPRYD4	SPRY domain containing 4	GLIS3	GLIS family zinc finger 3	PPFIA2	PTPRF interacting protein alpha 2	SCLT1	sodium channel and clathrin linker 1	TRMT9B	tRNA methyltransferase 9B (putative)	PPP3CA	protein phosphatase 3 catalytic subunit alpha	GLIS3	GLIS family zinc finger 3	POMP	proteasome maturation protein	L1TD1	LINE1 type transposase domain containing 1	SYCP2L	synaptonemal complex protein 2 like	SNX27	sorting nexin family member 27	RBPJ	recombination signal binding protein for immunoglobulin kappa J region
LRRFIP1	LRR binding FLII interacting protein 1			TENT5A	terminal nucleotidyltransferase 5A	DLGAP4	DLG associated protein 4			ZFPM2	zinc finger protein, FOG family member 2	SH2B3	SH2B adaptor protein 3	SH2B3	SH2B adaptor protein 3	PCDHGB7	protocadherin gamma subfamily B, 7	PRMT6	protein arginine methyltransferase 6	SLC30A8	solute carrier family 30 member 8	ACTG1	actin gamma 1	KATNA1	katanin catalytic subunit A1	TRIP4	thyroid hormone receptor interactor 4	KIAA1328	KIAA1328	PIGP	phosphatidylinositol glycan anchor biosynthesis class P	PBRM1	polybromo 1	MBNL3	muscleblind like splicing regulator 3	SHANK3	SH3 and multiple ankyrin repeat domains 3	KIAA1328	KIAA1328	PRPF39	pre-mRNA processing factor 39	PPM1B	protein phosphatase, Mg2+/Mn2+ dependent 1B	TEAD1	TEA domain transcription factor 1	KDM5C	lysine demethylase 5C	CBX5	chromobox 5
RSAD1	radical S-adenosyl methionine domain containing 1			ARL11	ADP ribosylation factor like GTPase 11	CLDN12	claudin 12			ARRDC3	arrestin domain containing 3	ARHGAP6	Rho GTPase activating protein 6	ARHGAP6	Rho GTPase activating protein 6	PLEKHG3	pleckstrin homology and RhoGEF domain containing G3	ALDH1B1	aldehyde dehydrogenase 1 family member B1	UBXN8	UBX domain protein 8	ABCA10	ATP binding cassette subfamily A member 10	LRRN2	leucine rich repeat neuronal 2	YTHDF3	YTH N6-methyladenosine RNA binding protein 3	ARSD	arylsulfatase D	GOLGA3	golgin A3	ACTA1	actin, alpha 1, skeletal muscle	ENKUR	enkurin, TRPC channel interacting protein	HOXB4	homeobox B4	ST3GAL1	ST3 beta-galactoside alpha-2,3-sialyltransferase 1	ATXN1L	ataxin 1 like	ANXA5	annexin A5	SCN9A	sodium voltage-gated channel alpha subunit 9	E2F7	E2F transcription factor 7	RNF38	ring finger protein 38
IKZF5	IKAROS family zinc finger 5			HNRNPC	heterogeneous nuclear ribonucleoprotein C (C1/C2)	LRRC70	leucine rich repeat containing 70			HECTD2	HECT domain E3 ubiquitin protein ligase 2	MTF2	metal response element binding transcription factor 2	MTF2	metal response element binding transcription factor 2	SH3GL2	SH3 domain containing GRB2 like 2, endophilin A1	MRPS7	mitochondrial ribosomal protein S7	ADPRHL1	ADP-ribosylhydrolase like 1	POU3F2	POU class 3 homeobox 2	UBTD2	ubiquitin domain containing 2	REV3L	REV3 like, DNA directed polymerase zeta catalytic subunit	DPAGT1	dolichyl-phosphate N-acetylglucosaminephosphotransferase 1	DYNLT3	dynein light chain Tctex-type 3	HMGCR	3-hydroxy-3-methylglutaryl-CoA reductase	NFATC2	nuclear factor of activated T cells 2	TSHZ3	teashirt zinc finger homeobox 3	ARSD	arylsulfatase D	PELI1	pellino E3 ubiquitin protein ligase 1	LHCGR	luteinizing hormone/choriogonadotropin receptor	HSPA13	heat shock protein family A (Hsp70) member 13	PLSCR1	phospholipid scramblase 1	SLC10A7	solute carrier family 10 member 7
SLC22A3	solute carrier family 22 member 3			EID3	EP300 interacting inhibitor of differentiation 3	ADAMTS4	ADAM metallopeptidase with thrombospondin type 1 motif 4			SNAP25	synaptosome associated protein 25	GTPBP1	GTP binding protein 1	GTPBP1	GTP binding protein 1	SLC16A9	solute carrier family 16 member 9	DCTN4	dynactin subunit 4	PDE12	phosphodiesterase 12	UBL3	ubiquitin like 3	NMBR	neuromedin B receptor	GCNT2	glucosaminyl (N-acetyl) transferase 2 (I blood group)	TMEM132D	transmembrane protein 132D	TMTC3	transmembrane and tetratricopeptide repeat containing 3	SCML1	Scm polycomb group protein like 1	SPDYA	speedy/RINGO cell cycle regulator family member A	TAT	tyrosine aminotransferase	DPAGT1	dolichyl-phosphate N-acetylglucosaminephosphotransferase 1	NOLC1	nucleolar and coiled-body phosphoprotein 1	PTBP3	polypyrimidine tract binding protein 3	KANSL2	KAT8 regulatory NSL complex subunit 2	HOOK3	hook microtubule tethering protein 3	CCR1	C-C motif chemokine receptor 1
FASLG	Fas ligand			FRMD4B	FERM domain containing 4B	ZNF652	zinc finger protein 652			PTPN4	protein tyrosine phosphatase, non-receptor type 4	PDE3A	phosphodiesterase 3A	PDE3A	phosphodiesterase 3A	MAP4K3	mitogen-activated protein kinase kinase kinase kinase 3	RPS20	ribosomal protein S20	LGI1	leucine rich glioma inactivated 1	PRDM10	PR/SET domain 10	CLEC16A	C-type lectin domain containing 16A	LIX1	limb and CNS expressed 1	EPB41L4A	erythrocyte membrane protein band 4.1 like 4A	AP4E1	adaptor related protein complex 4 subunit epsilon 1	NOTCH2	notch 2	NFATC1	nuclear factor of activated T cells 1	PHF6	PHD finger protein 6	TMEM86A	transmembrane protein 86A	THUMPD1	THUMP domain containing 1	CASTOR3	CASTOR family member 3	MSL3	MSL complex subunit 3	SOGA1	suppressor of glucose, autophagy associated 1	C5orf51	chromosome 5 open reading frame 51
SYNCRIP	synaptotagmin binding cytoplasmic RNA interacting protein			FBXO47	F-box protein 47	ERCC4	ERCC excision repair 4, endonuclease catalytic subunit			TRPC7	transient receptor potential cation channel subfamily C member 7	DTX4	deltex E3 ubiquitin ligase 4	DTX4	deltex E3 ubiquitin ligase 4	STC2	stanniocalcin 2	MCUR1	mitochondrial calcium uniporter regulator 1	LRRC10	leucine rich repeat containing 10	PCM1	pericentriolar material 1	LIMA1	LIM domain and actin binding 1	HLA-DRA	major histocompatibility complex, class II, DR alpha	TMEM86A	transmembrane protein 86A	PDE1C	phosphodiesterase 1C	NETO1	neuropilin and tolloid like 1	SLC1A2	solute carrier family 1 member 2	LARP1	La ribonucleoprotein domain family member 1	EPB41L4A	erythrocyte membrane protein band 4.1 like 4A	SMC6	structural maintenance of chromosomes 6	GNAL	G protein subunit alpha L	EML4	EMAP like 4	TMEM138	transmembrane protein 138	PPTC7	PTC7 protein phosphatase homolog
SHC3	SHC adaptor protein 3			CPA6	carboxypeptidase A6	LAMC2	laminin subunit gamma 2			ST6GALNAC4	ST6 N-acetylgalactosaminide alpha-2,6-sialyltransferase 4	UNC5A	unc-5 netrin receptor A	UNC5A	unc-5 netrin receptor A	EIF4G2	eukaryotic translation initiation factor 4 gamma 2	SLC7A1	solute carrier family 7 member 1	FTH1	ferritin heavy chain 1	DZIP3	DAZ interacting zinc finger protein 3	ANKRD28	ankyrin repeat domain 28	ZNF614	zinc finger protein 614	CERS6	ceramide synthase 6	TTR	transthyretin	HIVEP2	human immunodeficiency virus type I enhancer binding protein 2	TECRL	trans-2,3-enoyl-CoA reductase like	SLC7A6	solute carrier family 7 member 6	TMEM132D	transmembrane protein 132D	MAPK8	mitogen-activated protein kinase 8	ARHGEF3	Rho guanine nucleotide exchange factor 3	ANKUB1	ankyrin repeat and ubiquitin domain containing 1	NR6A1	nuclear receptor subfamily 6 group A member 1	STX7	syntaxin 7
PRPF4B	pre-mRNA processing factor 4B			MAGEA4	MAGE family member A4	EMC7	ER membrane protein complex subunit 7			EN2	engrailed homeobox 2	LZTS3	leucine zipper tumor suppressor family member 3	LZTS3	leucine zipper tumor suppressor family member 3	USP33	ubiquitin specific peptidase 33	MED28	mediator complex subunit 28	SERTAD2	SERTA domain containing 2	ERI1	exoribonuclease 1	CHIC1	cysteine rich hydrophobic domain 1	CSN3	casein kappa	FAM168A	family with sequence similarity 168 member A	METTL6	methyltransferase like 6	RPIA	ribose 5-phosphate isomerase A	THRB	thyroid hormone receptor beta	LATS2	large tumor suppressor kinase 2	FABP7	fatty acid binding protein 7	OTULINL	OTU deubiquitinase with linear linkage specificity like	SHC4	SHC adaptor protein 4	CTNNA3	catenin alpha 3	OSBP	oxysterol binding protein	EHBP1	EH domain binding protein 1
HNRNPUL1	heterogeneous nuclear ribonucleoprotein U like 1			LMO2	LIM domain only 2	TMEM218	transmembrane protein 218			DHTKD1	dehydrogenase E1 and transketolase domain containing 1	VIM	vimentin	VIM	vimentin	MYRIP	myosin VIIA and Rab interacting protein	CD209	CD209 molecule	GAB1	GRB2 associated binding protein 1	PPARGC1A	PPARG coactivator 1 alpha	RASSF8	Ras association domain family member 8	PDGFD	platelet derived growth factor D	CCN2	cellular communication network factor 2	RAP2C	RAP2C, member of RAS oncogene family	PRELID3B	PRELI domain containing 3B	DNAAF3	dynein axonemal assembly factor 3	CCNYL1	cyclin Y like 1	RAB8B	RAB8B, member RAS oncogene family	ABCB5	ATP binding cassette subfamily B member 5	SFRP2	secreted frizzled related protein 2	SMAP1	small ArfGAP 1	TRIM22	tripartite motif containing 22	SERBP1	SERPINE1 mRNA binding protein 1
ZSWIM6	zinc finger SWIM-type containing 6			MYH10	myosin heavy chain 10	GRIK5	glutamate ionotropic receptor kainate type subunit 5			NOVA1	NOVA alternative splicing regulator 1	LAYN	layilin	LAYN	layilin	GLRX5	glutaredoxin 5	GABRA4	gamma-aminobutyric acid type A receptor alpha4 subunit	GHSR	growth hormone secretagogue receptor	PURB	purine rich element binding protein B	HHIP	hedgehog interacting protein	CEACAM8	carcinoembryonic antigen related cell adhesion molecule 8	RAB8B	RAB8B, member RAS oncogene family	MKI67	marker of proliferation Ki-67	LIN7C	lin-7 homolog C, crumbs cell polarity complex component	TPGS2	tubulin polyglutamylase complex subunit 2	NRG1	neuregulin 1	FAM168A	family with sequence similarity 168 member A	PF4V1	platelet factor 4 variant 1	SPRED2	sprouty related EVH1 domain containing 2	PHTF2	putative homeodomain transcription factor 2	MYO5C	myosin VC	FLI1	Fli-1 proto-oncogene, ETS transcription factor
MDGA2	MAM domain containing glycosylphosphatidylinositol anchor 2			GABRA3	gamma-aminobutyric acid type A receptor alpha3 subunit	LSM14A	LSM14A, mRNA processing body assembly factor			EFR3A	EFR3 homolog A	FEM1C	fem-1 homolog C	FEM1C	fem-1 homolog C	TCERG1L	transcription elongation regulator 1 like	LSM5	LSM5 homolog, U6 small nuclear RNA and mRNA degradation associated	ZNF776	zinc finger protein 776	WASHC4	WASH complex subunit 4	EPHB3	EPH receptor B3	TMEM170B	transmembrane protein 170B	MEOX1	mesenchyme homeobox 1	CPA4	carboxypeptidase A4	MANEA	mannosidase endo-alpha	HP1BP3	heterochromatin protein 1 binding protein 3	SP3	Sp3 transcription factor	CCN2	cellular communication network factor 2	MIA3	MIA SH3 domain ER export factor 3	GRM2	glutamate metabotropic receptor 2	CELF1	CUGBP Elav-like family member 1	CSNK1E	casein kinase 1 epsilon	ZNRF3	zinc and ring finger 3
SPEF2	sperm flagellar 2			INSYN2	inhibitory synaptic factor 2A	PBX2	PBX homeobox 2			RPRD1B	regulation of nuclear pre-mRNA domain containing 1B	ILDR2	immunoglobulin like domain containing receptor 2	ILDR2	immunoglobulin like domain containing receptor 2	FRMD5	FERM domain containing 5	PRMT2	protein arginine methyltransferase 2	VIPAS39	VPS33B interacting protein, apical-basolateral polarity regulator, spe-39 homolog	RASSF3	Ras association domain family member 3	TPM3	tropomyosin 3	RGS5	regulator of G protein signaling 5	RBM4	RNA binding motif protein 4	CCDC40	coiled-coil domain containing 40	RBM26	RNA binding motif protein 26	EXTL2	exostosin like glycosyltransferase 2	HECA	hdc homolog, cell cycle regulator	MEOX1	mesenchyme homeobox 1	ACYP2	acylphosphatase 2	ROR1	receptor tyrosine kinase like orphan receptor 1	BAG5	BCL2 associated athanogene 5	TPTEP2-CSNK1E	TPTEP2-CSNK1E readthrough	BEAN1	brain expressed associated with NEDD4 1
HMBOX1	homeobox containing 1			RHCE	Rh blood group CcEe antigens	REEP3	receptor accessory protein 3			NCBP3	nuclear cap binding subunit 3	RIMS2	regulating synaptic membrane exocytosis 2	RIMS2	regulating synaptic membrane exocytosis 2	PEAK1	pseudopodium enriched atypical kinase 1	RFX3	regulatory factor X3	TIMM17A	translocase of inner mitochondrial membrane 17A	MAATS1	MYCBP associated and testis expressed 1	DMXL1	Dmx like 1	DENND2D	DENN domain containing 2D	CYREN	cell cycle regulator of NHEJ	FGF12	fibroblast growth factor 12	PRKAR1A	protein kinase cAMP-dependent type I regulatory subunit alpha	IL10RA	interleukin 10 receptor subunit alpha	ARMCX5	armadillo repeat containing X-linked 5	RBM4	RNA binding motif protein 4	CST3	cystatin C	GCLM	glutamate-cysteine ligase modifier subunit	COA3	cytochrome c oxidase assembly factor 3	EEF1AKMT3	EEF1A lysine methyltransferase 3	TSNAX	translin associated factor X
RABGAP1L	RAB GTPase activating protein 1 like			ARPC5	actin related protein 2/3 complex subunit 5	ARPC5	actin related protein 2/3 complex subunit 5			FEM1C	fem-1 homolog C	TIPARP	TCDD inducible poly(ADP-ribose) polymerase	TIPARP	TCDD inducible poly(ADP-ribose) polymerase	ZNF609	zinc finger protein 609	MCM5	minichromosome maintenance complex component 5	STATH	statherin	TADA2B	transcriptional adaptor 2B	API5	apoptosis inhibitor 5	UGT2B17	UDP glucuronosyltransferase family 2 member B17	LDLRAD3	low density lipoprotein receptor class A domain containing 3	MANBAL	mannosidase beta like	FAM126A	family with sequence similarity 126 member A	PLOD2	procollagen-lysine,2-oxoglutarate 5-dioxygenase 2	ATP6V1C1	ATPase H+ transporting V1 subunit C1	CYREN	cell cycle regulator of NHEJ	ZFPM2	zinc finger protein, FOG family member 2	SEC24A	SEC24 homolog A, COPII coat complex component	USP32	ubiquitin specific peptidase 32	FAM155A	family with sequence similarity 155 member A	EXOC2	exocyst complex component 2
MLF2	myeloid leukemia factor 2			GOLGA7	golgin A7	EEF1AKMT2	EEF1A lysine methyltransferase 2			PCGF3	polycomb group ring finger 3	ZEB2	zinc finger E-box binding homeobox 2	ZEB2	zinc finger E-box binding homeobox 2	STAG2	stromal antigen 2	TCIM	transcriptional and immune response regulator	ARL15	ADP ribosylation factor like GTPase 15	ZNF200	zinc finger protein 200	TMEM132B	transmembrane protein 132B	TMOD1	tropomodulin 1	UNC119B	unc-119 lipid binding chaperone B	GANC	glucosidase alpha, neutral C	RAPGEF6	Rap guanine nucleotide exchange factor 6	CP	ceruloplasmin	ZZZ3	zinc finger ZZ-type containing 3	LDLRAD3	low density lipoprotein receptor class A domain containing 3	METTL9	methyltransferase like 9	CLDN22	claudin 22	ZNF644	zinc finger protein 644	JPH1	junctophilin 1	CNOT6	CCR4-NOT transcription complex subunit 6
FOXP2	forkhead box P2			PITPNA	phosphatidylinositol transfer protein alpha	RFX3	regulatory factor X3			ATG5	autophagy related 5	EID1	EP300 interacting inhibitor of differentiation 1	EID1	EP300 interacting inhibitor of differentiation 1	SLC12A6	solute carrier family 12 member 6	FAM13C	family with sequence similarity 13 member C	COPS7A	COP9 signalosome subunit 7A	TSNAX	translin associated factor X	LRRN1	leucine rich repeat neuronal 1	RFK	riboflavin kinase	TMC8	transmembrane channel like 8	SLITRK4	SLIT and NTRK like family member 4	FBXL17	F-box and leucine rich repeat protein 17	ZNF384	zinc finger protein 384	STX12	syntaxin 12	TMC8	transmembrane channel like 8	ISG20	interferon stimulated exonuclease gene 20	TSHZ1	teashirt zinc finger homeobox 1	HECW2	HECT, C2 and WW domain containing E3 ubiquitin protein ligase 2	AK4	adenylate kinase 4	PARM1	prostate androgen-regulated mucin-like protein 1
POLH	DNA polymerase eta			C2orf49	chromosome 2 open reading frame 49	NCOA2	nuclear receptor coactivator 2			TCEAL5	transcription elongation factor A like 5	ADCYAP1R1	ADCYAP receptor type I	ADCYAP1R1	ADCYAP receptor type I	PTGIS	prostaglandin I2 synthase	DBP	D-box binding PAR bZIP transcription factor	ZNF586	zinc finger protein 586	SUPT16H	SPT16 homolog, facilitates chromatin remodeling subunit	PLEKHO2	pleckstrin homology domain containing O2	TFAP2A	transcription factor AP-2 alpha	SOGA1	suppressor of glucose, autophagy associated 1	ADGRL3	adhesion G protein-coupled receptor L3	TMEM11	transmembrane protein 11	EPPIN	epididymal peptidase inhibitor	SLC39A14	solute carrier family 39 member 14	SOGA1	suppressor of glucose, autophagy associated 1	TMPRSS11F	transmembrane serine protease 11F	PUM1	pumilio RNA binding family member 1	CERK	ceramide kinase	GPATCH8	G-patch domain containing 8	TBR1	T-box, brain 1
ELAVL2	ELAV like RNA binding protein 2			C5orf22	chromosome 5 open reading frame 22	ZNF716	zinc finger protein 716			ATP8A1	ATPase phospholipid transporting 8A1	CLIP1	CAP-Gly domain containing linker protein 1	CLIP1	CAP-Gly domain containing linker protein 1	PPFIA1	PTPRF interacting protein alpha 1	MIGA1	mitoguardin 1	MBD6	methyl-CpG binding domain protein 6	CBFB	core-binding factor subunit beta	ESRRG	estrogen related receptor gamma	NLGN3	neuroligin 3	FABP7	fatty acid binding protein 7	KLF11	Kruppel like factor 11	TTYH3	tweety family member 3	MTRNR2L3	MT-RNR2 like 3	RBFOX1	RNA binding fox-1 homolog 1	EFR3B	EFR3 homolog B	LMNTD1	lamin tail domain containing 1	EEF1E1	eukaryotic translation elongation factor 1 epsilon 1	HELZ	helicase with zinc finger	BMP3	bone morphogenetic protein 3	CIR1	corepressor interacting with RBPJ, 1
LAS1L	LAS1 like, ribosome biogenesis factor			GPX6	glutathione peroxidase 6	SOWAHA	sosondowah ankyrin repeat domain family member A			LZTS3	leucine zipper tumor suppressor family member 3	GNG2	G protein subunit gamma 2	GNG2	G protein subunit gamma 2	KRAS	KRAS proto-oncogene, GTPase	FCHO2	FCH domain only 2	OXR1	oxidation resistance 1	SPRY2	sprouty RTK signaling antagonist 2	GP5	glycoprotein V platelet	KCNJ2	potassium voltage-gated channel subfamily J member 2	GLCE	glucuronic acid epimerase	EXTL2	exostosin like glycosyltransferase 2	ASB5	ankyrin repeat and SOCS box containing 5	GREM1	gremlin 1, DAN family BMP antagonist	CD200R1	CD200 receptor 1	OSBPL10	oxysterol binding protein like 10	OCRL	OCRL, inositol polyphosphate-5-phosphatase	ZNF426	zinc finger protein 426	FNBP1L	formin binding protein 1 like	PHF8	PHD finger protein 8	ZNF136	zinc finger protein 136
HNRNPC	heterogeneous nuclear ribonucleoprotein C (C1/C2)			SOX30	SRY-box 30	PSMD12	proteasome 26S subunit, non-ATPase 12			MAN2A1	mannosidase alpha class 2A member 1	GGCX	gamma-glutamyl carboxylase	GGCX	gamma-glutamyl carboxylase	POU3F2	POU class 3 homeobox 2	SGPP2	sphingosine-1-phosphate phosphatase 2	HMGA2	high mobility group AT-hook 2	USP44	ubiquitin specific peptidase 44	MIER3	MIER family member 3	GOLGA6L9	golgin A6 family-like 9	HEYL	hes related family bHLH transcription factor with YRPW motif-like	MSANTD4	Myb/SANT DNA binding domain containing 4 with coiled-coils	RBM12	RNA binding motif protein 12	CCDC186	coiled-coil domain containing 186	ELL	elongation factor for RNA polymerase II	TMEM214	transmembrane protein 214	NFIA	nuclear factor I A	AGPAT5	1-acylglycerol-3-phosphate O-acyltransferase 5	PCMTD1	protein-L-isoaspartate (D-aspartate) O-methyltransferase domain containing 1	GNE	glucosamine (UDP-N-acetyl)-2-epimerase/N-acetylmannosamine kinase	DHX29	DExH-box helicase 29
CLCNKA	chloride voltage-gated channel Ka			UBE2D3	ubiquitin conjugating enzyme E2 D3	PGR	progesterone receptor			HIF1A	hypoxia inducible factor 1 subunit alpha	DNAJB6	DnaJ heat shock protein family (Hsp40) member B6	DNAJB6	DnaJ heat shock protein family (Hsp40) member B6	ZC2HC1C	zinc finger C2HC-type containing 1C	PDZRN3	PDZ domain containing ring finger 3	FAM13A	family with sequence similarity 13 member A	PARP12	poly(ADP-ribose) polymerase family member 12	TMEM229B	transmembrane protein 229B	SP100	SP100 nuclear antigen	LRRC7	leucine rich repeat containing 7	MEIS2	Meis homeobox 2	EPB41L3	erythrocyte membrane protein band 4.1 like 3	IFI44L	interferon induced protein 44 like	TDRD5	tudor domain containing 5	HIF3A	hypoxia inducible factor 3 subunit alpha	CYCS	cytochrome c, somatic	COL11A1	collagen type XI alpha 1 chain	ZNF264	zinc finger protein 264	RUSC1	RUN and SH3 domain containing 1	CREBRF	CREB3 regulatory factor
ETV5	ETS variant 5			MRPS35	mitochondrial ribosomal protein S35	CXCR2	C-X-C motif chemokine receptor 2			FAM219B	family with sequence similarity 219 member B	AKAP11	A-kinase anchoring protein 11	AKAP11	A-kinase anchoring protein 11	ZNF385C	zinc finger protein 385C	EGR1	early growth response 1	ATXN1L	ataxin 1 like	DR1	down-regulator of transcription 1	PDE4B	phosphodiesterase 4B	MAP4	microtubule associated protein 4	EFR3B	EFR3 homolog B	BAIAP2	BAI1 associated protein 2	TMEM215	transmembrane protein 215	PRKAR2A	protein kinase cAMP-dependent type II regulatory subunit alpha	CHML	CHM like, Rab escort protein 2	NUCB1	nucleobindin 1	PGAP1	post-GPI attachment to proteins 1	NGF	nerve growth factor	TBX18	T-box 18	FAM168A	family with sequence similarity 168 member A	RPRD1A	regulation of nuclear pre-mRNA domain containing 1A
FGF13	fibroblast growth factor 13			LY75	lymphocyte antigen 75	CEP120	centrosomal protein 120			GPBP1	GC-rich promoter binding protein 1	CCND3	cyclin D3	CCND3	cyclin D3	SPN	sialophorin	ZMYM3	zinc finger MYM-type containing 3	ARPC1A	actin related protein 2/3 complex subunit 1A	FYTTD1	forty-two-three domain containing 1	ERBB4	erb-b2 receptor tyrosine kinase 4	ICE1	interactor of little elongation complex ELL subunit 1	MGAT5B	alpha-1,6-mannosylglycoprotein 6-beta-N-acetylglucosaminyltransferase B	HOXD8	homeobox D8	PIWIL1	piwi like RNA-mediated gene silencing 1	ZNF506	zinc finger protein 506	EDIL3	EGF like repeats and discoidin domains 3	GLCE	glucuronic acid epimerase	MEX3A	mex-3 RNA binding family member A	GPATCH2L	G-patch domain containing 2 like	RPL15	ribosomal protein L15	SEC14L1	SEC14 like lipid binding 1	RRAS2	RAS related 2
CDH11	cadherin 11			DLD	dihydrolipoamide dehydrogenase	KIAA1107	KIAA1107			KMT5B	lysine methyltransferase 5B	PPARD	peroxisome proliferator activated receptor delta	PPARD	peroxisome proliferator activated receptor delta	PRKAA2	protein kinase AMP-activated catalytic subunit alpha 2	PCSK9	proprotein convertase subtilisin/kexin type 9	ZDHHC15	zinc finger DHHC-type containing 15	ESR2	estrogen receptor 2	PANK3	pantothenate kinase 3	MAP3K13	mitogen-activated protein kinase kinase kinase 13	ASCC2	activating signal cointegrator 1 complex subunit 2	HOXD10	homeobox D10	CA8	carbonic anhydrase 8	CLCC1	chloride channel CLIC like 1	ZNF568	zinc finger protein 568	HEYL	hes related family bHLH transcription factor with YRPW motif-like	HNRNPR	heterogeneous nuclear ribonucleoprotein R	ELOC	elongin C	ZNF706	zinc finger protein 706	WDR48	WD repeat domain 48	KIF1C	kinesin family member 1C
SLITRK6	SLIT and NTRK like family member 6			FAM204A	family with sequence similarity 204 member A	GNA13	G protein subunit alpha 13			RNF19A	ring finger protein 19A, RBR E3 ubiquitin protein ligase	MTUS2	microtubule associated scaffold protein 2	MTUS2	microtubule associated scaffold protein 2	NAV3	neuron navigator 3	GNL3L	G protein nucleolar 3 like	CDYL	chromodomain Y like	MIB1	mindbomb E3 ubiquitin protein ligase 1	SPIDR	scaffold protein involved in DNA repair	CLCN4	chloride voltage-gated channel 4	HMGA2	high mobility group AT-hook 2	SESN3	sestrin 3	PCM1	pericentriolar material 1	LYSMD3	LysM domain containing 3	PAXIP1	PAX interacting protein 1	UNC119B	unc-119 lipid binding chaperone B	ATF2	activating transcription factor 2	RSPO3	R-spondin 3	ZNHIT6	zinc finger HIT-type containing 6	SSH2	slingshot protein phosphatase 2	OTX2	orthodenticle homeobox 2
DCTN2	dynactin subunit 2			TPM1	tropomyosin 1	SOX8	SRY-box 8			MAST4	microtubule associated serine/threonine kinase family member 4	SPTB	spectrin beta, erythrocytic	SPTB	spectrin beta, erythrocytic	C2orf76	chromosome 2 open reading frame 76	CPE	carboxypeptidase E	MCF2	MCF.2 cell line derived transforming sequence	ATP2B1	ATPase plasma membrane Ca2+ transporting 1	FMR1	fragile X mental retardation 1	RNF6	ring finger protein 6	FRMD5	FERM domain containing 5	MRPS25	mitochondrial ribosomal protein S25	ARL13B	ADP ribosylation factor like GTPase 13B	CCL15	C-C motif chemokine ligand 15	BMP2	bone morphogenetic protein 2	TAOK1	TAO kinase 1	TIAM1	T cell lymphoma invasion and metastasis 1	FYN	FYN proto-oncogene, Src family tyrosine kinase	ITGB8	integrin subunit beta 8	HERC3	HECT and RLD domain containing E3 ubiquitin protein ligase 3	RAB18	RAB18, member RAS oncogene family
EPB41	erythrocyte membrane protein band 4.1			RPS6KA1	ribosomal protein S6 kinase A1	PDE1A	phosphodiesterase 1A			TMEM167A	transmembrane protein 167A	TMTC4	transmembrane and tetratricopeptide repeat containing 4	TMTC4	transmembrane and tetratricopeptide repeat containing 4	COL4A2	collagen type IV alpha 2 chain	HOXA13	homeobox A13	DENND6A	DENN domain containing 6A	CDH9	cadherin 9	MSI2	musashi RNA binding protein 2	GATAD1	GATA zinc finger domain containing 1	HIF3A	hypoxia inducible factor 3 subunit alpha	PFKP	phosphofructokinase, platelet	ID1	inhibitor of DNA binding 1, HLH protein	TIMM23	translocase of inner mitochondrial membrane 23	ERBIN	erbb2 interacting protein	LRRC7	leucine rich repeat containing 7	TRPM7	transient receptor potential cation channel subfamily M member 7	KDM5B	lysine demethylase 5B	BCL10	BCL10, immune signaling adaptor	TTC13	tetratricopeptide repeat domain 13	JARID2	jumonji and AT-rich interaction domain containing 2
BTBD3	BTB domain containing 3			ZNF441	zinc finger protein 441	HECW2	HECT, C2 and WW domain containing E3 ubiquitin protein ligase 2			USP49	ubiquitin specific peptidase 49	HK1	hexokinase 1	HK1	hexokinase 1	NAA20	N(alpha)-acetyltransferase 20, NatB catalytic subunit	GLYR1	glyoxylate reductase 1 homolog	KLHL29	kelch like family member 29	SLC35F3	solute carrier family 35 member F3	ANGPTL3	angiopoietin like 3	GPC6	glypican 6	TAOK1	TAO kinase 1	UBAP2	ubiquitin associated protein 2	BAZ2B	bromodomain adjacent to zinc finger domain 2B	HIP1	huntingtin interacting protein 1	EPB41L4B	erythrocyte membrane protein band 4.1 like 4B	MGAT5B	alpha-1,6-mannosylglycoprotein 6-beta-N-acetylglucosaminyltransferase B	ACBD3	acyl-CoA binding domain containing 3	FAM98B	family with sequence similarity 98 member B	UTY	ubiquitously transcribed tetratricopeptide repeat containing, Y-linked	NEBL	nebulette	MTX3	metaxin 3
CRKL	CRK like proto-oncogene, adaptor protein			ETF1	eukaryotic translation termination factor 1	NKAIN2	sodium/potassium transporting ATPase interacting 2			UTP14C	UTP14C, small subunit processome component	UNC5D	unc-5 netrin receptor D	UNC5D	unc-5 netrin receptor D	PNOC	prepronociceptin	DBT	dihydrolipoamide branched chain transacylase E2	FAM177A1	family with sequence similarity 177 member A1	ANKRD12	ankyrin repeat domain 12	STK11	serine/threonine kinase 11	ZNF426	zinc finger protein 426	ZSWIM6	zinc finger SWIM-type containing 6	ZNF564	zinc finger protein 564	KLF12	Kruppel like factor 12	FKBP14	FKBP prolyl isomerase 14	TBX5	T-box 5	SGPL1	sphingosine-1-phosphate lyase 1	ELOVL4	ELOVL fatty acid elongase 4	RAD21	RAD21 cohesin complex component	GCFC2	GC-rich sequence DNA-binding factor 2	GUCY1A2	guanylate cyclase 1 soluble subunit alpha 2	CEP162	centrosomal protein 162
DPP8	dipeptidyl peptidase 8			PHF14	PHD finger protein 14	LEKR1	leucine, glutamate and lysine rich 1			LRRTM4	leucine rich repeat transmembrane neuronal 4	BAZ1B	bromodomain adjacent to zinc finger domain 1B	BAZ1B	bromodomain adjacent to zinc finger domain 1B	TMEM221	transmembrane protein 221	NAP1L1	nucleosome assembly protein 1 like 1	ZDHHC13	zinc finger DHHC-type containing 13	IDNK	IDNK, gluconokinase	DLGAP1	DLG associated protein 1	RAB7A	RAB7A, member RAS oncogene family	FAM89B	family with sequence similarity 89 member B	SLITRK1	SLIT and NTRK like family member 1	CACNA2D1	calcium voltage-gated channel auxiliary subunit alpha2delta 1	MSANTD3	Myb/SANT DNA binding domain containing 3	FGFR1OP	FGFR1 oncogene partner	ASCC2	activating signal cointegrator 1 complex subunit 2	FBXO40	F-box protein 40	LEF1	lymphoid enhancer binding factor 1	COL14A1	collagen type XIV alpha 1 chain	TVP23A	trans-golgi network vesicle protein 23 homolog A	TCF12	transcription factor 12
KLHL34	kelch like family member 34			ADRA1A	adrenoceptor alpha 1A	AGBL2	ATP/GTP binding protein like 2			GAL3ST3	galactose-3-O-sulfotransferase 3	PDIK1L	PDLIM1 interacting kinase 1 like	PDIK1L	PDLIM1 interacting kinase 1 like	PDE5A	phosphodiesterase 5A			FOXI2	forkhead box I2	WIPF1	WAS/WASL interacting protein family member 1	GRXCR1	glutaredoxin and cysteine rich domain containing 1	SRPRA	SRP receptor subunit alpha	ACTR3	ARP3 actin related protein 3 homolog	PTCD3	pentatricopeptide repeat domain 3	IL13RA1	interleukin 13 receptor subunit alpha 1	MMP16	matrix metallopeptidase 16	MSRB3	methionine sulfoxide reductase B3	HMGA2	high mobility group AT-hook 2	TNPO1	transportin 1	TXNDC9	thioredoxin domain containing 9	SRSF3	serine and arginine rich splicing factor 3	FSCB	fibrous sheath CABYR binding protein	HIF1A	hypoxia inducible factor 1 subunit alpha
TRIM71	tripartite motif containing 71			ZNF470	zinc finger protein 470	WTAP	WT1 associated protein			AMBN	ameloblastin	JMJD1C	jumonji domain containing 1C	JMJD1C	jumonji domain containing 1C	LINGO2	leucine rich repeat and Ig domain containing 2			ZNF844	zinc finger protein 844	HOXA10	homeobox A10	DR1	down-regulator of transcription 1	COL4A3BP	collagen type IV alpha 3 binding protein	HTR6	5-hydroxytryptamine receptor 6	GPSM2	G protein signaling modulator 2	FTO	FTO, alpha-ketoglutarate dependent dioxygenase	DBT	dihydrolipoamide branched chain transacylase E2	CENPL	centromere protein L	MELTF	melanotransferrin	CCSER1	coiled-coil serine rich protein 1	PHAX	phosphorylated adaptor for RNA export	LYRM4	LYR motif containing 4	MLH3	mutL homolog 3	M1AP	meiosis 1 associated protein
TMEM207	transmembrane protein 207			CRYBG1	crystallin beta-gamma domain containing 1	RNF139	ring finger protein 139			CEP350	centrosomal protein 350	FERMT2	fermitin family member 2	FERMT2	fermitin family member 2	RBFOX1	RNA binding fox-1 homolog 1			ACSL4	acyl-CoA synthetase long chain family member 4	PLEKHH1	pleckstrin homology, MyTH4 and FERM domain containing H1	EPSTI1	epithelial stromal interaction 1	BNIP2	BCL2 interacting protein 2	YWHAG	tyrosine 3-monooxygenase/tryptophan 5-monooxygenase activation protein gamma	QRICH1	glutamine rich 1	FBXL3	F-box and leucine rich repeat protein 3	ADGRL1	adhesion G protein-coupled receptor L1	CCDC112	coiled-coil domain containing 112	FRMD5	FERM domain containing 5	SCAF11	SR-related CTD associated factor 11	SLC6A6	solute carrier family 6 member 6	SFR1	SWI5 dependent homologous recombination repair protein 1	TTI2	TELO2 interacting protein 2	BTN2A1	butyrophilin subfamily 2 member A1
PCGF3	polycomb group ring finger 3			KPNA1	karyopherin subunit alpha 1	NUDT13	nudix hydrolase 13			TNRC6B	trinucleotide repeat containing 6B	SIGLECL1	SIGLEC family like 1	SIGLECL1	SIGLEC family like 1	ATF6	activating transcription factor 6			CARMIL1	capping protein regulator and myosin 1 linker 1	NUFIP2	nuclear FMR1 interacting protein 2	SIPA1L3	signal induced proliferation associated 1 like 3	AMELX	amelogenin X-linked	DPYSL3	dihydropyrimidinase like 3	NAT8L	N-acetyltransferase 8 like	KHDRBS3	KH RNA binding domain containing, signal transduction associated 3	ARX	aristaless related homeobox	LTN1	listerin E3 ubiquitin protein ligase 1	ZSWIM6	zinc finger SWIM-type containing 6	PLCH1	phospholipase C eta 1	CPPED1	calcineurin like phosphoesterase domain containing 1	PTGER3	prostaglandin E receptor 3	KIAA1217	KIAA1217	BICC1	BicC family RNA binding protein 1
NDRG1	N-myc downstream regulated 1			METTL15	methyltransferase like 15	NYAP2	neuronal tyrosine-phosphorylated phosphoinositide-3-kinase adaptor 2			MAPK6	mitogen-activated protein kinase 6	KLF12	Kruppel like factor 12	KLF12	Kruppel like factor 12	ZBTB34	zinc finger and BTB domain containing 34			TAOK1	TAO kinase 1	AVL9	AVL9 cell migration associated	BCORL1	BCL6 corepressor like 1	MYRIP	myosin VIIA and Rab interacting protein	SGPL1	sphingosine-1-phosphate lyase 1	ST8SIA1	ST8 alpha-N-acetyl-neuraminide alpha-2,8-sialyltransferase 1	RIC1	RIC1 homolog, RAB6A GEF complex partner 1	FGF18	fibroblast growth factor 18	C14orf39	chromosome 14 open reading frame 39	FAM89B	family with sequence similarity 89 member B	TGS1	trimethylguanosine synthase 1	EOGT	EGF domain specific O-linked N-acetylglucosamine transferase	HOOK3	hook microtubule tethering protein 3	PGRMC2	progesterone receptor membrane component 2	ARMC8	armadillo repeat containing 8
NAA25	N(alpha)-acetyltransferase 25, NatB auxiliary subunit			MTRNR2L5	MT-RNR2 like 5	THSD7B	thrombospondin type 1 domain containing 7B			ZIC2	Zic family member 2	RELN	reelin	RELN	reelin	NDNF	neuron derived neurotrophic factor			C5orf30	chromosome 5 open reading frame 30	DCTD	dCMP deaminase	LOC339862	uncharacterized LOC339862	ZNF117	zinc finger protein 117	IKZF3	IKAROS family zinc finger 3	XDH	xanthine dehydrogenas	RND3	Rho family GTPase 3	TM9SF3	transmembrane 9 superfamily member 3	B2M	beta-2-microglobulin	ACTR3	ARP3 actin related protein 3 homolog	CTSO	cathepsin O	PAPOLB	poly(A) polymerase beta	KIAA0232	KIAA0232	ONECUT2	one cut homeobox 2	SOX13	SRY-box 13
CSGALNACT2	chondroitin sulfate N-acetylgalactosaminyltransferase 2			RAB27B	RAB27B, member RAS oncogene family	ORC4	origin recognition complex subunit 4			CLIP1	CAP-Gly domain containing linker protein 1	SLC35F1	solute carrier family 35 member F1	SLC35F1	solute carrier family 35 member F1	ALKBH4	alkB homolog 4, lysine demethylase			LNPK	lunapark, ER junction formation factor	RBM47	RNA binding motif protein 47	HIPK2	homeodomain interacting protein kinase 2	PPM1L	protein phosphatase, Mg2+/Mn2+ dependent 1L	DHCR24	24-dehydrocholesterol reductase			2001-03-01	membrane associated ring-CH-type finger 1	DNAJB2	DnaJ heat shock protein family (Hsp40) member B2	AP3B1	adaptor related protein complex 3 subunit beta 1	HTR6	5-hydroxytryptamine receptor 6	RMDN2	regulator of microtubule dynamics 2	RAPGEF2	Rap guanine nucleotide exchange factor 2	TMEM50B	transmembrane protein 50B	C6orf136	chromosome 6 open reading frame 136	DGKH	diacylglycerol kinase eta
ZNF608	zinc finger protein 608			APC	APC, WNT signaling pathway regulator	PRDM1	PR/SET domain 1			BRI3BP	BRI3 binding protein	KBTBD4	kelch repeat and BTB domain containing 4	KBTBD4	kelch repeat and BTB domain containing 4	ZNF346	zinc finger protein 346			RFT1	RFT1 homolog	WWC3	WWC family member 3	AMER3	APC membrane recruitment protein 3	MAP3K21	mitogen-activated protein kinase kinase kinase 21	ETNK1	ethanolamine kinase 1			RORA	RAR related orphan receptor A	FAM184A	family with sequence similarity 184 member A	ADCYAP1	adenylate cyclase activating polypeptide 1	YWHAG	tyrosine 3-monooxygenase/tryptophan 5-monooxygenase activation protein gamma	PEPD	peptidase D	DNM1L	dynamin 1 like	CLPTM1L	CLPTM1 like	TRMT10B	tRNA methyltransferase 10B	FGL2	fibrinogen like 2
B3GALT5	beta-1,3-galactosyltransferase 5			MLH3	mutL homolog 3	PRMT6	protein arginine methyltransferase 6			ZHX2	zinc fingers and homeoboxes 2	LSM14A	LSM14A, mRNA processing body assembly factor	LSM14A	LSM14A, mRNA processing body assembly factor	EDNRB	endothelin receptor type B			UBTD2	ubiquitin domain containing 2	HDHD2	haloacid dehalogenase like hydrolase domain containing 2	SS18	SS18, nBAF chromatin remodeling complex subunit	SPOCK1	SPARC (osteonectin), cwcv and kazal like domains proteoglycan 1	MMP15	matrix metallopeptidase 15			MYCT1	MYC target 1	SLC24A2	solute carrier family 24 member 2	PIGX	phosphatidylinositol glycan anchor biosynthesis class X	IKZF3	IKAROS family zinc finger 3	TMEM169	transmembrane protein 169	AGO4	argonaute RISC catalytic component 4	PPIG	peptidylprolyl isomerase G	PIP4P1	phosphatidylinositol-4,5-bisphosphate 4-phosphatase 1	SNAP29	synaptosome associated protein 29
PLCL2	phospholipase C like 2			RHD	Rh blood group D antigen	FBXO21	F-box protein 21			ATP11C	ATPase phospholipid transporting 11C	CALN1	calneuron 1	CALN1	calneuron 1	DENND4C	DENN domain containing 4C			TSR1	TSR1, ribosome maturation factor	PEG10	paternally expressed 10	HINT1	histidine triad nucleotide binding protein 1	CCR8	C-C motif chemokine receptor 8	TMEM214	transmembrane protein 214			COPB1	coatomer protein complex subunit beta 1	BAAT	bile acid-CoA:amino acid N-acyltransferase	PPM1K	protein phosphatase, Mg2+/Mn2+ dependent 1K	DPYSL3	dihydropyrimidinase like 3	TFEC	transcription factor EC	DCLK1	doublecortin like kinase 1	TRRAP	transformation/transcription domain associated protein	NIPAL3	NIPA like domain containing 3	HDX	highly divergent homeobox
STRN	striatin			MIS18BP1	MIS18 binding protein 1	EML1	EMAP like 1			DMXL2	Dmx like 2	CELF5	CUGBP Elav-like family member 5	CELF5	CUGBP Elav-like family member 5	GLUL	glutamate-ammonia ligase			PPP1R21	protein phosphatase 1 regulatory subunit 21	KIF16B	kinesin family member 16B	USP38	ubiquitin specific peptidase 38	CCNC	cyclin C	YIPF6	Yip1 domain family member 6			LHX8	LIM homeobox 8	CACTIN	cactin, spliceosome C complex subunit	CBFB	core-binding factor subunit beta	ETNK1	ethanolamine kinase 1	ARMC10	armadillo repeat containing 10	MAL2	mal, T cell differentiation protein 2 (gene/pseudogene)	NME5	NME/NM23 family member 5	SDK1	sidekick cell adhesion molecule 1	GEMIN8	gem nuclear organelle associated protein 8
RPAP3	RNA polymerase II associated protein 3			TPRA1	transmembrane protein adipocyte associated 1	PLCB2	phospholipase C beta 2			BEX1	brain expressed X-linked 1	ZNF385A	zinc finger protein 385A	ZNF385A	zinc finger protein 385A	UPF1	UPF1, RNA helicase and ATPase			DENND1B	DENN domain containing 1B	TM2D3	TM2 domain containing 3	NIPA2	NIPA magnesium transporter 2	ZNF75A	zinc finger protein 75a	WDR35	WD repeat domain 35			SKI	SKI proto-oncogene	NMNAT3	nicotinamide nucleotide adenylyltransferase 3	GALNT1	polypeptide N-acetylgalactosaminyltransferase 1	MMP15	matrix metallopeptidase 15	PPP4R3B	protein phosphatase 4 regulatory subunit 3B	CTDSPL2	CTD small phosphatase like 2	TRAF3IP2	TRAF3 interacting protein 2	PARPBP	PARP1 binding protein	KLHL8	kelch like family member 8
ARHGAP12	Rho GTPase activating protein 12			C10orf99	chromosome 10 open reading frame 99	PKN2	protein kinase N2			EIF3J	eukaryotic translation initiation factor 3 subunit J	RB1CC1	RB1 inducible coiled-coil 1	RB1CC1	RB1 inducible coiled-coil 1	PCDH17	protocadherin 17			SKP1	S-phase kinase associated protein 1	DENND1B	DENN domain containing 1B	EMCN	endomucin	TPD52L3	TPD52 like 3	USP38	ubiquitin specific peptidase 38			NPY2R	neuropeptide Y receptor Y2	TRIM22	tripartite motif containing 22	MYLK3	myosin light chain kinase 3	YIPF6	Yip1 domain family member 6	XIAP	X-linked inhibitor of apoptosis	TXLNA	taxilin alpha	RIMKLB	ribosomal modification protein rimK like family member B	ALOX15	arachidonate 15-lipoxygenase	LRTM2	leucine rich repeats and transmembrane domains 2
ACADSB	acyl-CoA dehydrogenase short/branched chain			RPL23A	ribosomal protein L23a	PCMTD1	protein-L-isoaspartate (D-aspartate) O-methyltransferase domain containing 1			IPO8	importin 8	NSMF	NMDA receptor synaptonuclear signaling and neuronal migration factor	NSMF	NMDA receptor synaptonuclear signaling and neuronal migration factor	HEATR5A	HEAT repeat containing 5A			OSBPL8	oxysterol binding protein like 8	ATP11B	ATPase phospholipid transporting 11B (putative)	MIER1	MIER1 transcriptional regulator	SGCD	sarcoglycan delta	NUCB1	nucleobindin 1			SOD2	superoxide dismutase 2	TMEM141	transmembrane protein 141	SLIT2	slit guidance ligand 2	WDR35	WD repeat domain 35	ETS1	ETS proto-oncogene 1, transcription factor	SPRY3	sprouty RTK signaling antagonist 3	TMOD2	tropomodulin 2	CDK6	cyclin dependent kinase 6	VWC2	von Willebrand factor C domain containing 2
LRRC75A	leucine rich repeat containing 75A			SEL1L	SEL1L, ERAD E3 ligase adaptor subunit	TMED5	transmembrane p24 trafficking protein 5			ZRANB1	zinc finger RANBP2-type containing 1	DCP1A	decapping mRNA 1A	DCP1A	decapping mRNA 1A	MAGI2	membrane associated guanylate kinase, WW and PDZ domain containing 2			BEST3	bestrophin 3	CDK6	cyclin dependent kinase 6	CNOT6L	CCR4-NOT transcription complex subunit 6 like	HNMT	histamine N-methyltransferase	RAPGEFL1	Rap guanine nucleotide exchange factor like 1			PLPP5	phospholipid phosphatase 5	PPIL4	peptidylprolyl isomerase like 4	WDR7	WD repeat domain 7	USP38	ubiquitin specific peptidase 38	RNASE7	ribonuclease A family member 7	TRPC4	transient receptor potential cation channel subfamily C member 4	CYP20A1	cytochrome P450 family 20 subfamily A member 1	ATAD2	ATPase family, AAA domain containing 2	ZIC3	Zic family member 3
APLF	aprataxin and PNKP like factor			SETDB2	SET domain bifurcated histone lysine methyltransferase 2	ATF7IP	activating transcription factor 7 interacting protein			PACSIN2	protein kinase C and casein kinase substrate in neurons 2	SLC2A10	solute carrier family 2 member 10	SLC2A10	solute carrier family 2 member 10	FOXA3	forkhead box A3			GYPA	glycophorin A (MNS blood group)	PHOX2A	paired like homeobox 2A	AMMECR1	Alport syndrome, mental retardation, midface hypoplasia and elliptocytosis chromosomal region gene 1	DCUN1D3	defective in cullin neddylation 1 domain containing 3	WBP2NL	WBP2 N-terminal like			EYS	eyes shut homolog	ARRDC3	arrestin domain containing 3	SPIN4	spindlin family member 4	SLC35E2B	solute carrier family 35 member E2B	LHFPL1	LHFPL tetraspan subfamily member 1	LHX8	LIM homeobox 8	PSMG3	proteasome assembly chaperone 3	KLHL7	kelch like family member 7	SPATA18	spermatogenesis associated 18
CCR2	C-C motif chemokine receptor 2			IKZF5	IKAROS family zinc finger 5	SRSF2	serine and arginine rich splicing factor 2			BEX2	brain expressed X-linked 2	GTF3C3	general transcription factor IIIC subunit 3	GTF3C3	general transcription factor IIIC subunit 3	ELOVL6	ELOVL fatty acid elongase 6			CLTRN	collectrin, amino acid transport regulator	TOMM34	translocase of outer mitochondrial membrane 34	PLPPR5	phospholipid phosphatase related 5	RSU1	Ras suppressor protein 1	MDM4	MDM4, p53 regulator			ETS1	ETS proto-oncogene 1, transcription factor	WASHC4	WASH complex subunit 4	KLHL5	kelch like family member 5	RAPGEFL1	Rap guanine nucleotide exchange factor like 1	RBPMS	RNA binding protein, mRNA processing factor	DUSP16	dual specificity phosphatase 16	RHPN2	rhophilin Rho GTPase binding protein 2	UNC80	unc-80 homolog, NALCN channel complex subunit	USP38	ubiquitin specific peptidase 38
NELL2	neural EGFL like 2			GLI2	GLI family zinc finger 2	ARMC8	armadillo repeat containing 8			PHF2	PHD finger protein 2	CASTOR2	cytosolic arginine sensor for mTORC1 subunit 2	CASTOR2	cytosolic arginine sensor for mTORC1 subunit 2	FRMD7	FERM domain containing 7			ZNF195	zinc finger protein 195	GLRB	glycine receptor beta	CAP2	cyclase associated actin cytoskeleton regulatory protein 2	CAPN7	calpain 7	PANK3	pantothenate kinase 3			MSI2	musashi RNA binding protein 2	ARL10	ADP ribosylation factor like GTPase 10	PRLR	prolactin receptor	WBP2NL	WBP2 N-terminal like	CHD1	chromodomain helicase DNA binding protein 1	PROK2	prokineticin 2	PPP4R3A	protein phosphatase 4 regulatory subunit 3A	NR3C1	nuclear receptor subfamily 3 group C member 1	HEY1	hes related family bHLH transcription factor with YRPW motif 1
TFDP1	transcription factor Dp-1			ANKRD20A1	ankyrin repeat domain 20 family member A1	GFI1	growth factor independent 1 transcriptional repressor			RIMS4	regulating synaptic membrane exocytosis 4	SESN3	sestrin 3	SESN3	sestrin 3	TBCA	tubulin folding cofactor A			ZNF552	zinc finger protein 552	BRWD1	bromodomain and WD repeat domain containing 1	TGDS	TDP-glucose 4,6-dehydratase	TLL1	tolloid like 1	NSD2	nuclear receptor binding SET domain protein 2			COL4A3	collagen type IV alpha 3 chain	PRRG3	proline rich and Gla domain 3	EHBP1	EH domain binding protein 1	GPR176	G protein-coupled receptor 176	THY1	Thy-1 cell surface antigen	OPA3	OPA3, outer mitochondrial membrane lipid metabolism regulator	TNRC6B	trinucleotide repeat containing 6B	GJA4	gap junction protein alpha 4	CROT	carnitine O-octanoyltransferase
SYT1	synaptotagmin 1			ANKRD20A2	ankyrin repeat domain 20 family member A2	CSF2RB	colony stimulating factor 2 receptor beta common subunit			TCEAL8	transcription elongation factor A like 8	ADGRA2	adhesion G protein-coupled receptor A2	ADGRA2	adhesion G protein-coupled receptor A2	NRXN2	neurexin 2			NECTIN3	nectin cell adhesion molecule 3	CREB3L1	cAMP responsive element binding protein 3 like 1	PLA2G4E	phospholipase A2 group IVE	EYA3	EYA transcriptional coactivator and phosphatase 3	SMG1	SMG1, nonsense mediated mRNA decay associated PI3K related kinase			C11orf58	chromosome 11 open reading frame 58	KRT4	keratin 4	CEP162	centrosomal protein 162	PANK3	pantothenate kinase 3	FUCA2	alpha-L-fucosidase 2	TEX55	testis expressed 55	LMLN	leishmanolysin like peptidase	ADRB3	adrenoceptor beta 3	KRAS	KRAS proto-oncogene, GTPase
ARL10	ADP ribosylation factor like GTPase 10			ANKRD20A4	ankyrin repeat domain 20 family member A4	GABRA6	gamma-aminobutyric acid type A receptor alpha6 subunit			GRSF1	G-rich RNA sequence binding factor 1	DEK	DEK proto-oncogene	DEK	DEK proto-oncogene	MAP3K20	mitogen-activated protein kinase kinase kinase 20			SIM2	SIM bHLH transcription factor 2	TMEM30A	transmembrane protein 30A	NEPRO	nucleolus and neural progenitor protein	NOP9	NOP9 nucleolar protein	ATPAF2	ATP synthase mitochondrial F1 complex assembly factor 2			CA2	carbonic anhydrase 2	ADAMTS6	ADAM metallopeptidase with thrombospondin type 1 motif 6	SNAI1	snail family transcriptional repressor 1	NSD2	nuclear receptor binding SET domain protein 2	YPEL5	yippee like 5	LSM14A	LSM14A, mRNA processing body assembly factor	AAK1	AP2 associated kinase 1	PHF21A	PHD finger protein 21A	SNX2	sorting nexin 2
KIF21B	kinesin family member 21B			SMG1	SMG1, nonsense mediated mRNA decay associated PI3K related kinase	PDE10A	phosphodiesterase 10A			CYFIP1	cytoplasmic FMR1 interacting protein 1	SULF2	sulfatase 2	SULF2	sulfatase 2	SYVN1	synoviolin 1			HBP1	HMG-box transcription factor 1	ARID4A	AT-rich interaction domain 4A	MSH2	mutS homolog 2	CHTOP	chromatin target of PRMT1	MGST3	microsomal glutathione S-transferase 3			FBXO30	F-box protein 30	C6orf132	chromosome 6 open reading frame 132	CTTNBP2	cortactin binding protein 2	SMG1	SMG1, nonsense mediated mRNA decay associated PI3K related kinase	COMMD8	COMM domain containing 8	UBE2L3	ubiquitin conjugating enzyme E2 L3	CDK13	cyclin dependent kinase 13	USP37	ubiquitin specific peptidase 37	MEIOC	meiosis specific with coiled-coil domain
KLRD1	killer cell lectin like receptor D1			PTPRK	protein tyrosine phosphatase, receptor type K	MRPL48	mitochondrial ribosomal protein L48			STRBP	spermatid perinuclear RNA binding protein	KANK1	KN motif and ankyrin repeat domains 1	KANK1	KN motif and ankyrin repeat domains 1	ARF6	ADP ribosylation factor 6			SORBS1	sorbin and SH3 domain containing 1	EXOC5	exocyst complex component 5	FXR1	FMR1 autosomal homolog 1	KIAA0754	KIAA0754	APPBP2	amyloid beta precursor protein binding protein 2			NUDT5	nudix hydrolase 5	RTL4	retrotransposon Gag like 4	TINAGL1	tubulointerstitial nephritis antigen like 1	ATPAF2	ATP synthase mitochondrial F1 complex assembly factor 2	ASPH	aspartate beta-hydroxylase	MTTP	microsomal triglyceride transfer protein	CNOT6	CCR4-NOT transcription complex subunit 6	LRRTM4	leucine rich repeat transmembrane neuronal 4	LRRC47	leucine rich repeat containing 47
UGT8	UDP glycosyltransferase 8			PNISR	PNN interacting serine and arginine rich protein	KCNS2	potassium voltage-gated channel modifier subfamily S member 2			PPP1R42	protein phosphatase 1 regulatory subunit 42	SOCS5	suppressor of cytokine signaling 5	SOCS5	suppressor of cytokine signaling 5	GRIN2A	glutamate ionotropic receptor NMDA type subunit 2A			DIP2A	disco interacting protein 2 homolog A	CYLD	CYLD lysine 63 deubiquitinase	LMNB1	lamin B1	PLCB4	phospholipase C beta 4	GPR176	G protein-coupled receptor 176			FGF2	fibroblast growth factor 2	OPCML	opioid binding protein/cell adhesion molecule like	GGACT	gamma-glutamylamine cyclotransferase	MGST3	microsomal glutathione S-transferase 3	PTPN1	protein tyrosine phosphatase, non-receptor type 1	TMEM236	transmembrane protein 236	WNK3	WNK lysine deficient protein kinase 3	KIAA0825	KIAA0825	ANKRD12	ankyrin repeat domain 12
PURG	purine rich element binding protein G			EFHC1	EF-hand domain containing 1	SELENOK	selenoprotein K			KLHL18	kelch like family member 18	S100A2	S100 calcium binding protein A2	S100A2	S100 calcium binding protein A2	CCDC189	coiled-coil domain containing 189			PCDHB12	protocadherin beta 12	DCLK1	doublecortin like kinase 1	GABBR2	gamma-aminobutyric acid type B receptor subunit 2	ALPL	alkaline phosphatase, biomineralization associated	ONECUT2	one cut homeobox 2			AP4E1	adaptor related protein complex 4 subunit epsilon 1	PYGO1	pygopus family PHD finger 1	TRIM14	tripartite motif containing 14	MDM4	MDM4, p53 regulator	TAPT1	transmembrane anterior posterior transformation 1	MAOB	monoamine oxidase B	HDX	highly divergent homeobox	JMJD8	jumonji domain containing 8	PAX6	paired box 6
FHL5	four and a half LIM domains 5			ZWILCH	zwilch kinetochore protein	SLC10A7	solute carrier family 10 member 7			RCN2	reticulocalbin 2	MAN2A1	mannosidase alpha class 2A member 1	MAN2A1	mannosidase alpha class 2A member 1	STAU1	staufen double-stranded RNA binding protein 1			ZFP90	ZFP90 zinc finger protein	HLA-C	major histocompatibility complex, class I, C	CDYL2	chromodomain Y like 2	TXNDC17	thioredoxin domain containing 17	OSBPL10	oxysterol binding protein like 10			TMEM41B	transmembrane protein 41B	GPR183	G protein-coupled receptor 183	C5orf24	chromosome 5 open reading frame 24	VAT1	vesicle amine transport 1	EXTL2	exostosin like glycosyltransferase 2	ZNF860	zinc finger protein 860	TIMM50	translocase of inner mitochondrial membrane 50	WDR33	WD repeat domain 33	TCF4	transcription factor 4
ZFAND5	zinc finger AN1-type containing 5			CEP78	centrosomal protein 78	ABCA10	ATP binding cassette subfamily A member 10			SENP7	SUMO specific peptidase 7	PRRT4	proline rich transmembrane protein 4	PRRT4	proline rich transmembrane protein 4	PTGDR2	prostaglandin D2 receptor 2			KIAA0319	KIAA0319	ZBTB10	zinc finger and BTB domain containing 10	ZNF519	zinc finger protein 519	SPIN1	spindlin 1	SLC35E2B	solute carrier family 35 member E2B			OR2L13	olfactory receptor family 2 subfamily L member 13	OSR1	odd-skipped related transcription factor 1	PRMT3	protein arginine methyltransferase 3	YTHDC1	YTH domain containing 1	BRWD3	bromodomain and WD repeat domain containing 3	NSG2	neuronal vesicle trafficking associated 2	NLGN4X	neuroligin 4 X-linked	HMG20A	high mobility group 20A	SLC35D2	solute carrier family 35 member D2
DCAF1	DDB1 and CUL4 associated factor 1			MRPL43	mitochondrial ribosomal protein L43	SGCD	sarcoglycan delta			SCN3A	sodium voltage-gated channel alpha subunit 3	ARHGAP42	Rho GTPase activating protein 42	ARHGAP42	Rho GTPase activating protein 42	ZNF320	zinc finger protein 320			USP10	ubiquitin specific peptidase 10	ZNF250	zinc finger protein 250	VASH2	vasohibin 2	DPP10	dipeptidyl peptidase like 10	YTHDC1	YTH domain containing 1			PRKAA2	protein kinase AMP-activated catalytic subunit alpha 2	CFAP44	cilia and flagella associated protein 44	RETREG1	reticulophagy regulator 1	APPBP2	amyloid beta precursor protein binding protein 2	SLC25A40	solute carrier family 25 member 40	ARCN1	archain 1	OTP	orthopedia homeobox	IGDCC4	immunoglobulin superfamily DCC subclass member 4	OSTF1	osteoclast stimulating factor 1
SETDB2	SET domain bifurcated histone lysine methyltransferase 2			TRIM13	tripartite motif containing 13	GATC	glutamyl-tRNA amidotransferase subunit C			RELN	reelin	DNAH12	dynein axonemal heavy chain 12	DNAH12	dynein axonemal heavy chain 12	TCF12	transcription factor 12			ZNF540	zinc finger protein 540	SLC25A24	solute carrier family 25 member 24	TCEAL6	transcription elongation factor A like 6	AGPAT4	1-acylglycerol-3-phosphate O-acyltransferase 4	RICTOR	RPTOR independent companion of MTOR complex 2			PDCD7	programmed cell death 7	ZNF618	zinc finger protein 618	CAMK2D	calcium/calmodulin dependent protein kinase II delta	ONECUT2	one cut homeobox 2	GOLGA3	golgin A3	COL16A1	collagen type XVI alpha 1 chain	RASGEF1A	RasGEF domain family member 1A	WASF2	WAS protein family member 2	ZNF853	zinc finger protein 853
SMOC1	SPARC related modular calcium binding 1			PAPLN	papilin, proteoglycan like sulfated glycoprotein	CDC23	cell division cycle 23			SLX4	SLX4 structure-specific endonuclease subunit	TRPS1	transcriptional repressor GATA binding 1	TRPS1	transcriptional repressor GATA binding 1	MKNK1	MAP kinase interacting serine/threonine kinase 1			C5orf64	chromosome 5 open reading frame 64	OSBPL1A	oxysterol binding protein like 1A	HDX	highly divergent homeobox	GABRA4	gamma-aminobutyric acid type A receptor alpha4 subunit	QKI	QKI, KH domain containing RNA binding			TEX14	testis expressed 14, intercellular bridge forming factor	HLA-DMB	major histocompatibility complex, class II, DM beta	PTER	phosphotriesterase related	ZNF609	zinc finger protein 609	APC	APC, WNT signaling pathway regulator	PRC1	protein regulator of cytokinesis 1	DIRAS3	DIRAS family GTPase 3	TFAP2B	transcription factor AP-2 beta	KCNMB2	potassium calcium-activated channel subfamily M regulatory beta subunit 2
CLCNKB	chloride voltage-gated channel Kb			C1orf21	chromosome 1 open reading frame 21	ALG10B	ALG10B, alpha-1,2-glucosyltransferase			ULBP2	UL16 binding protein 2	CSRP2	cysteine and glycine rich protein 2	CSRP2	cysteine and glycine rich protein 2	KCNH8	potassium voltage-gated channel subfamily H member 8			ZNF426	zinc finger protein 426	DIP2B	disco interacting protein 2 homolog B	PTP4A3	protein tyrosine phosphatase type IVA, member 3	POSTN	periostin	SPTB	spectrin beta, erythrocytic			EN1	engrailed homeobox 1	A1CF	APOBEC1 complementation factor	IL31	interleukin 31	QKI	QKI, KH domain containing RNA binding	RBFOX2	RNA binding fox-1 homolog 2	SCN2A	sodium voltage-gated channel alpha subunit 2	HMGB2	high mobility group box 2	SMARCD1	SWI/SNF related, matrix associated, actin dependent regulator of chromatin, subfamily d, member 1	DENND1A	DENN domain containing 1A
HMGN3	high mobility group nucleosomal binding domain 3			CD8A	CD8a molecule	AHI1	Abelson helper integration site 1			PCNX1	pecanex 1	PPIP5K1	diphosphoinositol pentakisphosphate kinase 1	PPIP5K1	diphosphoinositol pentakisphosphate kinase 1	MEIOC	meiosis specific with coiled-coil domain			ZNF559-ZNF177	ZNF559-ZNF177 readthrough	ABHD5	abhydrolase domain containing 5	SYN3	synapsin III	DPH6	diphthamine biosynthesis 6	BCAP29	B cell receptor associated protein 29			DLX1	distal-less homeobox 1	TNC	tenascin C	CRHBP	corticotropin releasing hormone binding protein	SPTB	spectrin beta, erythrocytic	DPYSL4	dihydropyrimidinase like 4	IFT22	intraflagellar transport 22	RNF141	ring finger protein 141	C10orf82	chromosome 10 open reading frame 82	GALNT7	polypeptide N-acetylgalactosaminyltransferase 7
CCNQ	cyclin Q			OXGR1	oxoglutarate receptor 1	LCP1	lymphocyte cytosolic protein 1			BAZ1B	bromodomain adjacent to zinc finger domain 1B	FRMD5	FERM domain containing 5	FRMD5	FERM domain containing 5	ZFP41	ZFP41 zinc finger protein			ADGRB2	adhesion G protein-coupled receptor B2	RGPD5	RANBP2-like and GRIP domain containing 5	MAF	MAF bZIP transcription factor	KCTD16	potassium channel tetramerization domain containing 16	VAT1	vesicle amine transport 1			NR1D1	nuclear receptor subfamily 1 group D member 1	ILF2	interleukin enhancer binding factor 2	INPP5A	inositol polyphosphate-5-phosphatase A	BCAP29	B cell receptor associated protein 29	ATAD1	ATPase family, AAA domain containing 1	ZNF264	zinc finger protein 264	BEND2	BEN domain containing 2	SH2B3	SH2B adaptor protein 3	IREB2	iron responsive element binding protein 2
SLC43A1	solute carrier family 43 member 1			FKBP5	FKBP prolyl isomerase 5	SLC25A16	solute carrier family 25 member 16			CNBD1	cyclic nucleotide binding domain containing 1	SLCO3A1	solute carrier organic anion transporter family member 3A1	SLCO3A1	solute carrier organic anion transporter family member 3A1	FBXO27	F-box protein 27			FAM110B	family with sequence similarity 110 member B	RGPD8	RANBP2-like and GRIP domain containing 8	GRPEL1	GrpE like 1, mitochondrial	HCN1	hyperpolarization activated cyclic nucleotide gated potassium channel 1	DPP8	dipeptidyl peptidase 8			RIPOR2	RHO family interacting cell polarization regulator 2	DAZL	deleted in azoospermia like	SNX27	sorting nexin family member 27	SHISA6	shisa family member 6	CTTNBP2NL	CTTNBP2 N-terminal like	DNAJA1	DnaJ heat shock protein family (Hsp40) member A1	CDC73	cell division cycle 73	DPYSL2	dihydropyrimidinase like 2	PPP2CA	protein phosphatase 2 catalytic subunit alpha
PCDH15	protocadherin related 15			ANKRD20A3	ankyrin repeat domain 20 family member A3	VPS35	VPS35, retromer complex component			TMED5	transmembrane p24 trafficking protein 5	MRM3	mitochondrial rRNA methyltransferase 3	MRM3	mitochondrial rRNA methyltransferase 3	PLOD1	procollagen-lysine,2-oxoglutarate 5-dioxygenase 1			HSF5	heat shock transcription factor 5	RGPD6	RANBP2-like and GRIP domain containing 6	CYP20A1	cytochrome P450 family 20 subfamily A member 1	LRRTM1	leucine rich repeat transmembrane neuronal 1	TMBIM6	transmembrane BAX inhibitor motif containing 6			NAB2	NGFI-A binding protein 2	KSR2	kinase suppressor of ras 2	PRPF38B	pre-mRNA processing factor 38B	TMBIM6	transmembrane BAX inhibitor motif containing 6	CDS1	CDP-diacylglycerol synthase 1	ANKRD12	ankyrin repeat domain 12	FGFR1OP2	FGFR1 oncogene partner 2	CEACAM1	carcinoembryonic antigen related cell adhesion molecule 1	KDM5B	lysine demethylase 5B
CHCHD3	coiled-coil-helix-coiled-coil-helix domain containing 3			PLXNA4	plexin A4	RAB9B	RAB9B, member RAS oncogene family			CAPS2	calcyphosine 2	MIEF2	mitochondrial elongation factor 2	MIEF2	mitochondrial elongation factor 2	DDX52	DExD-box helicase 52			FYB1	FYN binding protein 1	PER3	period circadian regulator 3	NECAB3	N-terminal EF-hand calcium binding protein 3	LYVE1	lymphatic vessel endothelial hyaluronan receptor 1	SHISA6	shisa family member 6			FAM117B	family with sequence similarity 117 member B	CLMN	calmin	RDM1	RAD52 motif containing 1	PLEKHA1	pleckstrin homology domain containing A1	RBPJ	recombination signal binding protein for immunoglobulin kappa J region	RNASE4	ribonuclease A family member 4	ETV1	ETS variant 1	ZNF664	zinc finger protein 664	TP53INP1	tumor protein p53 inducible nuclear protein 1
KCNH8	potassium voltage-gated channel subfamily H member 8			NUP210L	nucleoporin 210 like	GUF1	GUF1 homolog, GTPase			GNG2	G protein subunit gamma 2	SENP1	SUMO specific peptidase 1	SENP1	SUMO specific peptidase 1	TSPYL4	TSPY like 4			TCF20	transcription factor 20	TRIT1	tRNA isopentenyltransferase 1	DCUN1D1	defective in cullin neddylation 1 domain containing 1	ZSCAN21	zinc finger and SCAN domain containing 21	MELTF	melanotransferrin			PDGFC	platelet derived growth factor C	ANO7	anoctamin 7	XKRY	XK related, Y-linked	CEP85	centrosomal protein 85	MGME1	mitochondrial genome maintenance exonuclease 1	GPR155	G protein-coupled receptor 155	KIAA1841	KIAA1841	HMGXB4	HMG-box containing 4	COPS7A	COP9 signalosome subunit 7A
C8orf59	chromosome 8 open reading frame 59			C16orf58	chromosome 16 open reading frame 58	PA2G4	proliferation-associated 2G4			ZBTB6	zinc finger and BTB domain containing 6	SIRT1	sirtuin 1	SIRT1	sirtuin 1	ROBO2	roundabout guidance receptor 2			CASP10	caspase 10	COL4A1	collagen type IV alpha 1 chain	PLK2	polo like kinase 2	KDM4C	lysine demethylase 4C	HOOK3	hook microtubule tethering protein 3			CNMD	chondromodulin	RHOQ	ras homolog family member Q	XKRY2	XK related, Y-linked 2	DFFA	DNA fragmentation factor subunit alpha	PTN	pleiotrophin	SEC24D	SEC24 homolog D, COPII coat complex component	ZDHHC3	zinc finger DHHC-type containing 3	VAMP2	vesicle associated membrane protein 2	ARHGAP29	Rho GTPase activating protein 29
HSPA13	heat shock protein family A (Hsp70) member 13			PRMT2	protein arginine methyltransferase 2	ZNF451	zinc finger protein 451			FERMT2	fermitin family member 2	RIBC1	RIB43A domain with coiled-coils 1	RIBC1	RIB43A domain with coiled-coils 1	FAM227A	family with sequence similarity 227 member A			EDNRB	endothelin receptor type B	OGN	osteoglycin	FOXF1	forkhead box F1	SLC30A7	solute carrier family 30 member 7	CEP85	centrosomal protein 85			ISL2	ISL LIM homeobox 2	SNX18	sorting nexin 18	ZFHX4	zinc finger homeobox 4	RWDD4	RWD domain containing 4	ELMOD2	ELMO domain containing 2	CTCF	CCCTC-binding factor	IGF2R	insulin like growth factor 2 receptor	SATB2	SATB homeobox 2	POU2F1	POU class 2 homeobox 1
ZNF839	zinc finger protein 839			NCS1	neuronal calcium sensor 1	CXCL10	C-X-C motif chemokine ligand 10			PTGFRN	prostaglandin F2 receptor inhibitor	IMPAD1	inositol monophosphatase domain containing 1	IMPAD1	inositol monophosphatase domain containing 1	OSTM1	osteoclastogenesis associated transmembrane protein 1			L2HGDH	L-2-hydroxyglutarate dehydrogenase	SRGAP1	SLIT-ROBO Rho GTPase activating protein 1	VXN	vexin	KLHDC10	kelch domain containing 10	DFFA	DNA fragmentation factor subunit alpha			RMI1	RecQ mediated genome instability 1	ASPN	asporin	TRDN	triadin	HOOK3	hook microtubule tethering protein 3	FGF9	fibroblast growth factor 9	ZBTB33	zinc finger and BTB domain containing 33	SYNJ2BP	synaptojanin 2 binding protein	NDUFA10	NADH:ubiquinone oxidoreductase subunit A10	LEKR1	leucine, glutamate and lysine rich 1
CLIC4	chloride intracellular channel 4			TFCP2L1	transcription factor CP2 like 1	TLR4	toll like receptor 4			CLVS1	clavesin 1	FOXP4	forkhead box P4	FOXP4	forkhead box P4	HS2ST1	heparan sulfate 2-O-sulfotransferase 1			ZNF558	zinc finger protein 558	GHR	growth hormone receptor	SPAM1	sperm adhesion molecule 1	XIAP	X-linked inhibitor of apoptosis	RWDD4	RWD domain containing 4			AQP4	aquaporin 4	SMR3B	submaxillary gland androgen regulated protein 3B	TRPS1	transcriptional repressor GATA binding 1	MRGPRF	MAS related GPR family member F	ASB1	ankyrin repeat and SOCS box containing 1	PCDH11Y	protocadherin 11 Y-linked	NIM1K	NIM1 serine/threonine protein kinase	TTLL7	tubulin tyrosine ligase like 7	ATAD2	ATPase family, AAA domain containing 2
CPNE8	copine 8			TUFM	Tu translation elongation factor, mitochondrial	ANKRD12	ankyrin repeat domain 12			NEUROD1	neuronal differentiation 1	KDELR2	KDEL endoplasmic reticulum protein retention receptor 2	KDELR2	KDEL endoplasmic reticulum protein retention receptor 2	BBX	BBX, HMG-box containing			NLGN4Y	neuroligin 4 Y-linked	RGPD3	RANBP2-like and GRIP domain containing 3	PRPF38B	pre-mRNA processing factor 38B	TMEM68	transmembrane protein 68	MRGPRF	MAS related GPR family member F			AP3S1	adaptor related protein complex 3 subunit sigma 1	SHISA7	shisa family member 7	MBD5	methyl-CpG binding domain protein 5	LRP4	LDL receptor related protein 4	SMCO3	single-pass membrane protein with coiled-coil domains 3	POLH	DNA polymerase eta	GXYLT1	glucoside xylosyltransferase 1	AP1S3	adaptor related protein complex 1 subunit sigma 3	HNRNPK	heterogeneous nuclear ribonucleoprotein K
VSIG1	V-set and immunoglobulin domain containing 1			APOBEC4	apolipoprotein B mRNA editing enzyme catalytic polypeptide like 4	PTCHD4	patched domain containing 4			PIF1	PIF1 5'-to-3' DNA helicase	RCAN2	regulator of calcineurin 2	RCAN2	regulator of calcineurin 2	ABI2	abl interactor 2			SUCLG2	succinate-CoA ligase GDP-forming beta subunit	CA3	carbonic anhydrase 3	HOMER1	homer scaffold protein 1	ARF6	ADP ribosylation factor 6	LRP4	LDL receptor related protein 4			NFE2L2	nuclear factor, erythroid 2 like 2	PCDH17	protocadherin 17	HS6ST3	heparan sulfate 6-O-sulfotransferase 3	LRP8	LDL receptor related protein 8	WIPF1	WAS/WASL interacting protein family member 1	SIPA1L1	signal induced proliferation associated 1 like 1	HBS1L	HBS1 like translational GTPase	SPOCK1	SPARC (osteonectin), cwcv and kazal like domains proteoglycan 1	KCNB1	potassium voltage-gated channel subfamily B member 1
SLC25A5	solute carrier family 25 member 5			EHF	ETS homologous factor	PLEK2	pleckstrin 2			PPT1	palmitoyl-protein thioesterase 1	ERI1	exoribonuclease 1	ERI1	exoribonuclease 1	SH2B3	SH2B adaptor protein 3			GNL3L	G protein nucleolar 3 like	UBE2E3	ubiquitin conjugating enzyme E2 E3	PTGES3	prostaglandin E synthase 3	PEX6	peroxisomal biogenesis factor 6	LRP8	LDL receptor related protein 8			A1CF	APOBEC1 complementation factor	PHF12	PHD finger protein 12	YTHDF3	YTH N6-methyladenosine RNA binding protein 3	C16orf70	chromosome 16 open reading frame 70	HERPUD2	HERPUD family member 2	CTDNEP1	CTD nuclear envelope phosphatase 1	CHSY3	chondroitin sulfate synthase 3	SUSD6	sushi domain containing 6	ZSCAN12	zinc finger and SCAN domain containing 12
ZDHHC16	zinc finger DHHC-type containing 16			MID2	midline 2	ZNF587B	zinc finger protein 587B			ERCC4	ERCC excision repair 4, endonuclease catalytic subunit	SLC6A17	solute carrier family 6 member 17	SLC6A17	solute carrier family 6 member 17	PRR27	proline rich 27			PRR27	proline rich 27	UAP1	UDP-N-acetylglucosamine pyrophosphorylase 1	DMXL2	Dmx like 2	CCT6B	chaperonin containing TCP1 subunit 6B	C16orf70	chromosome 16 open reading frame 70			FAM43A	family with sequence similarity 43 member A	IGF1	insulin like growth factor 1	MED17	mediator complex subunit 17	PARP8	poly(ADP-ribose) polymerase family member 8	SNTB2	syntrophin beta 2	TAOK1	TAO kinase 1	SPANXN5	SPANX family member N5	SRCIN1	SRC kinase signaling inhibitor 1	ENPP3	ectonucleotide pyrophosphatase/phosphodiesterase 3
IQGAP1	IQ motif containing GTPase activating protein 1			SMURF1	SMAD specific E3 ubiquitin protein ligase 1	SAMD5	sterile alpha motif domain containing 5			APPBP2	amyloid beta precursor protein binding protein 2	NSFL1C	NSFL1 cofactor	NSFL1C	NSFL1 cofactor	CYP20A1	cytochrome P450 family 20 subfamily A member 1			CALD1	caldesmon 1	GCC2	GRIP and coiled-coil domain containing 2	RPGR	retinitis pigmentosa GTPase regulator	PROM1	prominin 1	PARP8	poly(ADP-ribose) polymerase family member 8			RDH10	retinol dehydrogenase 10	DIP2B	disco interacting protein 2 homolog B	PTPN4	protein tyrosine phosphatase, non-receptor type 4	CRIPT	CXXC repeat containing interactor of PDZ3 domain	PPP1CB	protein phosphatase 1 catalytic subunit beta	ABRAXAS1	abraxas 1, BRCA1 A complex subunit	MAPK8	mitogen-activated protein kinase 8	FNDC5	fibronectin type III domain containing 5	TMPRSS11B	transmembrane serine protease 11B
ZFP82	ZFP82 zinc finger protein			MAGEA12	MAGE family member A12	CCNG1	cyclin G1			NFIB	nuclear factor I B	CNOT8	CCR4-NOT transcription complex subunit 8	CNOT8	CCR4-NOT transcription complex subunit 8	NRG3	neuregulin 3			SLC1A6	solute carrier family 1 member 6	PARG	poly(ADP-ribose) glycohydrolase	KCNAB1	potassium voltage-gated channel subfamily A member regulatory beta subunit 1	IL17D	interleukin 17D	TFRC	transferrin receptor			FGF12	fibroblast growth factor 12	LRP6	LDL receptor related protein 6	DCUN1D5	defective in cullin neddylation 1 domain containing 5	TFRC	transferrin receptor	FSCN1	fascin actin-bundling protein 1	FBXO27	F-box protein 27	KDM6A	lysine demethylase 6A	MRPS16	mitochondrial ribosomal protein S16	CSTF2T	cleavage stimulation factor subunit 2 tau variant
TMEM239	transmembrane protein 239			SLC8A1	solute carrier family 8 member A1	SLC38A2	solute carrier family 38 member 2			PPARD	peroxisome proliferator activated receptor delta	ITGAL	integrin subunit alpha L	ITGAL	integrin subunit alpha L	TANC2	tetratricopeptide repeat, ankyrin repeat and coiled-coil containing 2			CROT	carnitine O-octanoyltransferase	RGPD4	RANBP2-like and GRIP domain containing 4	UBLCP1	ubiquitin like domain containing CTD phosphatase 1	DHX36	DEAH-box helicase 36	RGN	regucalcin			BCOR	BCL6 corepressor	ABRA	actin binding Rho activating protein	HFM1	HFM1, ATP dependent DNA helicase homolog	RGN	regucalcin	KIAA0040	KIAA0040	PXMP4	peroxisomal membrane protein 4	ANO6	anoctamin 6	ZDHHC2	zinc finger DHHC-type containing 2	SMIM13	small integral membrane protein 13
SRGAP3	SLIT-ROBO Rho GTPase activating protein 3			CYP2C8	cytochrome P450 family 2 subfamily C member 8	UCHL5	ubiquitin C-terminal hydrolase L5			SERTAD4	SERTA domain containing 4	CALHM5	calcium homeostasis modulator family member 5	CALHM5	calcium homeostasis modulator family member 5	ADGRB2	adhesion G protein-coupled receptor B2			PHACTR2	phosphatase and actin regulator 2	NEK4	NIMA related kinase 4	CASTOR2	cytosolic arginine sensor for mTORC1 subunit 2	CLEC14A	C-type lectin domain containing 14A	APOBEC2	apolipoprotein B mRNA editing enzyme catalytic subunit 2			CLCA4	chloride channel accessory 4	CUL2	cullin 2	ANKS1B	ankyrin repeat and sterile alpha motif domain containing 1B	APOBEC2	apolipoprotein B mRNA editing enzyme catalytic subunit 2	RAB21	RAB21, member RAS oncogene family	PLSCR1	phospholipid scramblase 1	MYCN	MYCN proto-oncogene, bHLH transcription factor	ZFYVE26	zinc finger FYVE-type containing 26	CFAP52	cilia and flagella associated protein 52
DCC	DCC netrin 1 receptor			LRRC8C	leucine rich repeat containing 8 VRAC subunit C	DPH3	diphthamide biosynthesis 3			AMMECR1	Alport syndrome, mental retardation, midface hypoplasia and elliptocytosis chromosomal region gene 1	CLEC1A	C-type lectin domain family 1 member A	CLEC1A	C-type lectin domain family 1 member A	TMEM108	transmembrane protein 108			TAOK3	TAO kinase 3	MAP3K1	mitogen-activated protein kinase kinase kinase 1	ARSJ	arylsulfatase family member J	POF1B	POF1B, actin binding protein	ZNF609	zinc finger protein 609			SEC23A	Sec23 homolog A, coat complex II component	BCL2L14	BCL2 like 14	SPATS2L	spermatogenesis associated serine rich 2 like	DHCR24	24-dehydrocholesterol reductase	SLITRK6	SLIT and NTRK like family member 6	NAP1L3	nucleosome assembly protein 1 like 3	CST9L	cystatin 9 like	PTAR1	protein prenyltransferase alpha subunit repeat containing 1	ZNF550	zinc finger protein 550
NUDT5	nudix hydrolase 5			SOGA1	suppressor of glucose, autophagy associated 1	MOXD1	monooxygenase DBH like 1			SEZ6L2	seizure related 6 homolog like 2	NINJ1	ninjurin 1	NINJ1	ninjurin 1	RAE1	ribonucleic acid export 1			FAM122C	family with sequence similarity 122C	BEX1	brain expressed X-linked 1	F11	coagulation factor XI	KALRN	kalirin RhoGEF kinase	CRIPT	CXXC repeat containing interactor of PDZ3 domain			COPS7B	COP9 signalosome subunit 7B	ZNF592	zinc finger protein 592	SAXO2	stabilizer of axonemal microtubules 2	TMEM120B	transmembrane protein 120B	FBXO45	F-box protein 45	MIER3	MIER family member 3	ZKSCAN1	zinc finger with KRAB and SCAN domains 1	BCL11B	BCL11B, BAF complex component	TMEM161B	transmembrane protein 161B
KLF12	Kruppel like factor 12			HPCAL4	hippocalcin like 4	WDR91	WD repeat domain 91			RASSF8	Ras association domain family member 8	KIAA1958	KIAA1958	KIAA1958	KIAA1958	RAB35	RAB35, member RAS oncogene family			TGM2	transglutaminase 2	MPZL2	myelin protein zero like 2	QTRT2	queuine tRNA-ribosyltransferase accessory subunit 2	GYG1	glycogenin 1	IGF2BP2	insulin like growth factor 2 mRNA binding protein 2			MBNL3	muscleblind like splicing regulator 3	SYT6	synaptotagmin 6	LONRF3	LON peptidase N-terminal domain and ring finger 3	IGF2BP2	insulin like growth factor 2 mRNA binding protein 2	MDM1	Mdm1 nuclear protein	POGK	pogo transposable element derived with KRAB domain	FMO3	flavin containing monooxygenase 3	EBF2	EBF transcription factor 2	CHSY3	chondroitin sulfate synthase 3
ATP7B	ATPase copper transporting beta			MAGEA1	MAGE family member A1	DNAJC24	DnaJ heat shock protein family (Hsp40) member C24			EPHA7	EPH receptor A7	CA3	carbonic anhydrase 3	CA3	carbonic anhydrase 3	IRGQ	immunity related GTPase Q			WIPF3	WAS/WASL interacting protein family member 3	RNF135	ring finger protein 135	RNF217	ring finger protein 217	MMADHC	metabolism of cobalamin associated D	RNF182	ring finger protein 182			IQCB1	IQ motif containing B1	SEC22A	SEC22 homolog A, vesicle trafficking protein	PRKCA	protein kinase C alpha	IBA57	IBA57, iron-sulfur cluster assembly	ZNF791	zinc finger protein 791	ABI1	abl interactor 1	TET2	tet methylcytosine dioxygenase 2	KRT38	keratin 38	TUBE1	tubulin epsilon 1
AFAP1	actin filament associated protein 1			CRIPT	CXXC repeat containing interactor of PDZ3 domain	CBX3	chromobox 3			CUL5	cullin 5	CLMP	CXADR like membrane protein	CLMP	CXADR like membrane protein	GAN	gigaxonin			ZBTB8OS	zinc finger and BTB domain containing 8 opposite strand	HNRNPD	heterogeneous nuclear ribonucleoprotein D	STRN	striatin	NEXMIF	neurite extension and migration factor	IBA57	IBA57, iron-sulfur cluster assembly			NR4A3	nuclear receptor subfamily 4 group A member 3	SLIT1	slit guidance ligand 1	RNF180	ring finger protein 180	RNF182	ring finger protein 182	KMT5B	lysine methyltransferase 5B	CEP126	centrosomal protein 126	PHF12	PHD finger protein 12	FAM122C	family with sequence similarity 122C	RBBP4	RB binding protein 4, chromatin remodeling factor
MOCS2	molybdenum cofactor synthesis 2			FAM177B	family with sequence similarity 177 member B	ZNF492	zinc finger protein 492			LIN9	lin-9 DREAM MuvB core complex component	NBEA	neurobeachin	NBEA	neurobeachin	KIF21B	kinesin family member 21B			SCAF11	SR-related CTD associated factor 11	TMEM260	transmembrane protein 260	ERVH48-1	endogenous retrovirus group 48 member 1	LACC1	laccase domain containing 1	DAG1	dystroglycan 1			RGMB	repulsive guidance molecule BMP co-receptor b	STAG1	stromal antigen 1	ZBED9	zinc finger BED-type containing 9	ABR	ABR, RhoGEF and GTPase activating protein	KIF15	kinesin family member 15	HACD4	3-hydroxyacyl-CoA dehydratase 4	PCDH8	protocadherin 8	FCGR1B	Fc fragment of IgG receptor Ib	PLS1	plastin 1
HNRNPA0	heterogeneous nuclear ribonucleoprotein A0			ZMAT4	zinc finger matrin-type 4	ZNF570	zinc finger protein 570			PIK3R1	phosphoinositide-3-kinase regulatory subunit 1	NEUROD1	neuronal differentiation 1	NEUROD1	neuronal differentiation 1	MDM4	MDM4, p53 regulator			EDAR	ectodysplasin A receptor	UPP1	uridine phosphorylase 1	RNF6	ring finger protein 6	CHSY1	chondroitin sulfate synthase 1	ABR	ABR, RhoGEF and GTPase activating protein			KLHL15	kelch like family member 15	GAN	gigaxonin	EGFR	epidermal growth factor receptor	EEF2K	eukaryotic elongation factor 2 kinase	UGDH	UDP-glucose 6-dehydrogenase	DAAM1	dishevelled associated activator of morphogenesis 1	NR4A2	nuclear receptor subfamily 4 group A member 2	HOXA3	homeobox A3	CSNK2A2	casein kinase 2 alpha 2
NRCAM	neuronal cell adhesion molecule			MAGEA2	MAGE family member A2	C1orf21	chromosome 1 open reading frame 21			NSMF	NMDA receptor synaptonuclear signaling and neuronal migration factor	LYPLA1	lysophospholipase 1	LYPLA1	lysophospholipase 1	HCN3	hyperpolarization activated cyclic nucleotide gated potassium channel 3			MS4A2	membrane spanning 4-domains A2	PCP4	Purkinje cell protein 4	MPC1	mitochondrial pyruvate carrier 1	FAM111B	family with sequence similarity 111 member B	MTMR11	myotubularin related protein 11			PPP6C	protein phosphatase 6 catalytic subunit	CD200	CD200 molecule	RB1CC1	RB1 inducible coiled-coil 1	DAG1	dystroglycan 1	ZNF793	zinc finger protein 793	FOXC1	forkhead box C1	MPL	MPL proto-oncogene, thrombopoietin receptor	UBXN1	UBX domain protein 1	DISC1	DISC1 scaffold protein
ANKIB1	ankyrin repeat and IBR domain containing 1			MAGEA2B	MAGE family member A2B	C4orf51	chromosome 4 open reading frame 51			SCN1A	sodium voltage-gated channel alpha subunit 1	SH3GL2	SH3 domain containing GRB2 like 2, endophilin A1	SH3GL2	SH3 domain containing GRB2 like 2, endophilin A1	HHLA2	HERV-H LTR-associating 2			HIPK2	homeodomain interacting protein kinase 2	DENND4C	DENN domain containing 4C	NKAIN2	sodium/potassium transporting ATPase interacting 2	P4HB	prolyl 4-hydroxylase subunit beta	TMEM120B	transmembrane protein 120B			HNRNPR	heterogeneous nuclear ribonucleoprotein R	IL12RB2	interleukin 12 receptor subunit beta 2	SNTG1	syntrophin gamma 1	DPP8	dipeptidyl peptidase 8	ZNF615	zinc finger protein 615	MDGA2	MAM domain containing glycosylphosphatidylinositol anchor 2	SPAG9	sperm associated antigen 9	ALS2	ALS2, alsin Rho guanine nucleotide exchange factor	BDP1	B double prime 1, subunit of RNA polymerase III transcription initiation factor IIIB
WDR55	WD repeat domain 55			RBAK	RB associated KRAB zinc finger	KLHL5	kelch like family member 5			RTN1	reticulon 1	RHOC	ras homolog family member C	RHOC	ras homolog family member C	C2orf68	chromosome 2 open reading frame 68			NUDT4	nudix hydrolase 4	ESCO1	establishment of sister chromatid cohesion N-acetyltransferase 1	FUCA2	alpha-L-fucosidase 2	RBMS2	RNA binding motif single stranded interacting protein 2	SSH2	slingshot protein phosphatase 2			NR3C2	nuclear receptor subfamily 3 group C member 2	PAF1	PAF1 homolog, Paf1/RNA polymerase II complex component	IFT43	intraflagellar transport 43	MTMR11	myotubularin related protein 11	HMBOX1	homeobox containing 1	GLRA2	glycine receptor alpha 2	RABIF	RAB interacting factor	TWIST1	twist family bHLH transcription factor 1	SPCS3	signal peptidase complex subunit 3
BRD1	bromodomain containing 1			MGST1	microsomal glutathione S-transferase 1	SRSF12	serine and arginine rich splicing factor 12			H2AFX	H2A histone family member X	ZFP36L2	ZFP36 ring finger protein like 2	ZFP36L2	ZFP36 ring finger protein like 2	SLC16A12	solute carrier family 16 member 12			BNIP3	BCL2 interacting protein 3	RUFY2	RUN and FYVE domain containing 2	SRRM1	serine and arginine repetitive matrix 1	UNC5C	unc-5 netrin receptor C	PLEKHA1	pleckstrin homology domain containing A1			ZNF273	zinc finger protein 273	KMO	kynurenine 3-monooxygenase	ZBTB1	zinc finger and BTB domain containing 1	TTYH3	tweety family member 3	CYP2U1	cytochrome P450 family 2 subfamily U member 1	PPP1R8	protein phosphatase 1 regulatory subunit 8	SEC24A	SEC24 homolog A, COPII coat complex component	ST6GALNAC5	ST6 N-acetylgalactosaminide alpha-2,6-sialyltransferase 5	CALCB	calcitonin related polypeptide beta
NCOA2	nuclear receptor coactivator 2			SLC35E1	solute carrier family 35 member E1	CDK14	cyclin dependent kinase 14			DZIP3	DAZ interacting zinc finger protein 3	PWWP2A	PWWP domain containing 2A	PWWP2A	PWWP domain containing 2A	SIGLEC14	sialic acid binding Ig like lectin 14			LRRC8A	leucine rich repeat containing 8 VRAC subunit A	NLK	nemo like kinase	ARHGEF33	Rho guanine nucleotide exchange factor 33	OSBPL8	oxysterol binding protein like 8	PTMS	parathymosin			NAT1	N-acetyltransferase 1	SUZ12	SUZ12, polycomb repressive complex 2 subunit	ACTC1	actin, alpha, cardiac muscle 1	SSH2	slingshot protein phosphatase 2	PAPOLG	poly(A) polymerase gamma	IFT88	intraflagellar transport 88	CBX5	chromobox 5	PRRC2B	proline rich coiled-coil 2B	LURAP1L	leucine rich adaptor protein 1 like
AGGF1	angiogenic factor with G-patch and FHA domains 1			MRTFB	myocardin related transcription factor B	NUP50	nucleoporin 50			RARA	retinoic acid receptor alpha	SNCAIP	synuclein alpha interacting protein	SNCAIP	synuclein alpha interacting protein	SMAD9	SMAD family member 9			KIAA0753	KIAA0753	PDZRN3	PDZ domain containing ring finger 3	CTTNBP2	cortactin binding protein 2	STAU2	staufen double-stranded RNA binding protein 2	CTDNEP1	CTD nuclear envelope phosphatase 1			PM20D2	peptidase M20 domain containing 2	PODXL	podocalyxin like	GEM	GTP binding protein overexpressed in skeletal muscle	PTMS	parathymosin	ZCCHC10	zinc finger CCHC-type containing 10	DRAM2	DNA damage regulated autophagy modulator 2	USP33	ubiquitin specific peptidase 33	NABP2	nucleic acid binding protein 2	CAMK2G	calcium/calmodulin dependent protein kinase II gamma
TLN2	talin 2			ETV3	ETS variant 3	HSFY1	heat shock transcription factor Y-linked 1			CSRP2	cysteine and glycine rich protein 2	JOSD1	Josephin domain containing 1	JOSD1	Josephin domain containing 1	GRIA3	glutamate ionotropic receptor AMPA type subunit 3			NADK	NAD kinase	TOPORS	TOP1 binding arginine/serine rich protein	SRPK2	SRSF protein kinase 2	PUDP	pseudouridine 5'-phosphatase	TDRP	testis development related protein			DCAF12L1	DDB1 and CUL4 associated factor 12 like 1	COL5A1	collagen type V alpha 1 chain	IRF2BPL	interferon regulatory factor 2 binding protein like	CTDNEP1	CTD nuclear envelope phosphatase 1	CEP85L	centrosomal protein 85 like	MIA2	MIA SH3 domain ER export factor 2	SRSF2	serine and arginine rich splicing factor 2	SOCS7	suppressor of cytokine signaling 7	RMI1	RecQ mediated genome instability 1
ZNF543	zinc finger protein 543			SRGAP2	SLIT-ROBO Rho GTPase activating protein 2	HSFY2	heat shock transcription factor Y-linked 2			DGKE	diacylglycerol kinase epsilon	PPARGC1A	PPARG coactivator 1 alpha	PPARGC1A	PPARG coactivator 1 alpha	PCDH20	protocadherin 20			MAP9	microtubule associated protein 9	KRAS	KRAS proto-oncogene, GTPase	COMMD6	COMM domain containing 6	IMPA1	inositol monophosphatase 1	UBE2I	ubiquitin conjugating enzyme E2 I			TMEM108	transmembrane protein 108	UHRF1BP1	UHRF1 binding protein 1	RANBP3	RAN binding protein 3	TDRP	testis development related protein	LMX1B	LIM homeobox transcription factor 1 beta	RABEP1	rabaptin, RAB GTPase binding effector protein 1	TRIM59	tripartite motif containing 59	HLTF	helicase like transcription factor	TRIM59	tripartite motif containing 59
URI1	URI1, prefoldin like chaperone			SNX14	sorting nexin 14	KLHL42	kelch like family member 42			FYCO1	FYVE and coiled-coil domain containing 1	EPHA8	EPH receptor A8	EPHA8	EPH receptor A8	IL2RB	interleukin 2 receptor subunit beta			ZNF439	zinc finger protein 439	UTP3	UTP3, small subunit processome component	FRMPD4	FERM and PDZ domain containing 4	MYORG	myogenesis regulating glycosidase (putative)	SFRP5	secreted frizzled related protein 5			SLC25A25	solute carrier family 25 member 25	COMMD2	COMM domain containing 2	PCDHB16	protocadherin beta 16	UBE2I	ubiquitin conjugating enzyme E2 I	TMEM216	transmembrane protein 216	ANO7	anoctamin 7	CPPED1	calcineurin like phosphoesterase domain containing 1	DLEU7	deleted in lymphocytic leukemia 7	CCND1	cyclin D1
GUCY1A2	guanylate cyclase 1 soluble subunit alpha 2			CCDC122	coiled-coil domain containing 122	ARMCX3	armadillo repeat containing X-linked 3			RORA	RAR related orphan receptor A	MAST4	microtubule associated serine/threonine kinase family member 4	MAST4	microtubule associated serine/threonine kinase family member 4	MAVS	mitochondrial antiviral signaling protein			CSTF3	cleavage stimulation factor subunit 3	PNMA1	PNMA family member 1	CTR9	CTR9 homolog, Paf1/RNA polymerase II complex component	VPS36	vacuolar protein sorting 36 homolog	CDX1	caudal type homeobox 1			GRHL3	grainyhead like transcription factor 3	ITGA2B	integrin subunit alpha 2b	COL5A2	collagen type V alpha 2 chain	SFRP5	secreted frizzled related protein 5	SH3RF1	SH3 domain containing ring finger 1	AAK1	AP2 associated kinase 1	NUP50	nucleoporin 50	FRZB	frizzled related protein	CBX6	chromobox 6
MYOC	myocilin			SV2C	synaptic vesicle glycoprotein 2C	KCTD3	potassium channel tetramerization domain containing 3			XPNPEP3	X-prolyl aminopeptidase 3	RASL12	RAS like family 12	RASL12	RAS like family 12	EI24	EI24, autophagy associated transmembrane protein			RHOH	ras homolog family member H	ADGRA3	adhesion G protein-coupled receptor A3	DDI1	DNA damage inducible 1 homolog 1	FLCN	folliculin	PCNX1	pecanex 1			GPR180	G protein-coupled receptor 180	ACAD11	acyl-CoA dehydrogenase family member 11	NECAB3	N-terminal EF-hand calcium binding protein 3	CDX1	caudal type homeobox 1	STK32A	serine/threonine kinase 32A	RTN4	reticulon 4	CCDC50	coiled-coil domain containing 50	EPHA8	EPH receptor A8	CNTNAP4	contactin associated protein like 4
KANSL2	KAT8 regulatory NSL complex subunit 2			PELO	pelota mRNA surveillance and ribosome rescue factor	SRCAP	Snf2 related CREBBP activator protein			DNA2	DNA replication helicase/nuclease 2	CENPN	centromere protein N	CENPN	centromere protein N	SUV39H2	suppressor of variegation 3-9 homolog 2			FAM219B	family with sequence similarity 219 member B	ROR1	receptor tyrosine kinase like orphan receptor 1	VPS25	vacuolar protein sorting 25 homolog	LDLRAD4	low density lipoprotein receptor class A domain containing 4	SOX5	SRY-box 5			SOX6	SRY-box 6	RAPGEF3	Rap guanine nucleotide exchange factor 3	CD302	CD302 molecule	PCNX1	pecanex 1	ST8SIA1	ST8 alpha-N-acetyl-neuraminide alpha-2,8-sialyltransferase 1	SCN7A	sodium voltage-gated channel alpha subunit 7	CCSER2	coiled-coil serine rich protein 2	AAK1	AP2 associated kinase 1	PHACTR2	phosphatase and actin regulator 2
SNAP25	synaptosome associated protein 25			TGFA	transforming growth factor alpha	APPBP2	amyloid beta precursor protein binding protein 2			EID1	EP300 interacting inhibitor of differentiation 1	THRAP3	thyroid hormone receptor associated protein 3	THRAP3	thyroid hormone receptor associated protein 3	INPP5A	inositol polyphosphate-5-phosphatase A			PAPPA	pappalysin 1	EIF4A2	eukaryotic translation initiation factor 4A2	HLA-DMA	major histocompatibility complex, class II, DM alpha	HSDL1	hydroxysteroid dehydrogenase like 1	PEX12	peroxisomal biogenesis factor 12			RTN4	reticulon 4	TCEANC	transcription elongation factor A N-terminal and central domain containing	LY75-CD302	LY75-CD302 readthrough	SOX5	SRY-box 5	RMND5B	required for meiotic nuclear division 5 homolog B	PDCD1LG2	programmed cell death 1 ligand 2	GPATCH2L	G-patch domain containing 2 like	SV2C	synaptic vesicle glycoprotein 2C	FBXW9	F-box and WD repeat domain containing 9
PCSK2	proprotein convertase subtilisin/kexin type 2			TNFSF12-TNFSF13	TNFSF12-TNFSF13 readthrough	AGXT2	alanine--glyoxylate aminotransferase 2			GPATCH8	G-patch domain containing 8	PSD2	pleckstrin and Sec7 domain containing 2	PSD2	pleckstrin and Sec7 domain containing 2	GDF10	growth differentiation factor 10			TMEM117	transmembrane protein 117	HS6ST2	heparan sulfate 6-O-sulfotransferase 2	SLC17A8	solute carrier family 17 member 8	IER3	immediate early response 3	GABRB3	gamma-aminobutyric acid type A receptor beta3 subunit			TBX5	T-box 5	ARNT2	aryl hydrocarbon receptor nuclear translocator 2	PIK3R2	phosphoinositide-3-kinase regulatory subunit 2	PEX12	peroxisomal biogenesis factor 12	CTTNBP2	cortactin binding protein 2	NF1	neurofibromin 1	RIMS1	regulating synaptic membrane exocytosis 1	HAND1	heart and neural crest derivatives expressed 1	GIGYF2	GRB10 interacting GYF protein 2
RPTOR	regulatory associated protein of MTOR complex 1			TNFSF13	TNF superfamily member 13	IKBIP	IKBKB interacting protein			VANGL1	VANGL planar cell polarity protein 1	TULP4	tubby like protein 4	TULP4	tubby like protein 4	PCDHGC5	protocadherin gamma subfamily C, 5			HEPACAM	hepatic and glial cell adhesion molecule	ZKSCAN2	zinc finger with KRAB and SCAN domains 2	RASGRP3	RAS guanyl releasing protein 3	CPEB2	cytoplasmic polyadenylation element binding protein 2	ZNF831	zinc finger protein 831			DLG1	discs large MAGUK scaffold protein 1	PRY	PTPN13 like Y-linked	FAM20B	FAM20B, glycosaminoglycan xylosylkinase	GABRB3	gamma-aminobutyric acid type A receptor beta3 subunit	SPOCK3	SPARC (osteonectin), cwcv and kazal like domains proteoglycan 3	CRISPLD1	cysteine rich secretory protein LCCL domain containing 1	UBFD1	ubiquitin family domain containing 1	ZNF609	zinc finger protein 609	GLS	glutaminase
WTAP	WT1 associated protein			HNRNPA0	heterogeneous nuclear ribonucleoprotein A0	CAPS2	calcyphosine 2			ACADSB	acyl-CoA dehydrogenase short/branched chain	CLNS1A	chloride nucleotide-sensitive channel 1A	CLNS1A	chloride nucleotide-sensitive channel 1A	PCDHGC4	protocadherin gamma subfamily C, 4			HS3ST5	heparan sulfate-glucosamine 3-sulfotransferase 5	MAPK8	mitogen-activated protein kinase 8	GJB6	gap junction protein beta 6	ZEB2	zinc finger E-box binding homeobox 2	AFG3L2	AFG3 like matrix AAA peptidase subunit 2			EIF3J	eukaryotic translation initiation factor 3 subunit J	MOCS2	molybdenum cofactor synthesis 2	TMEM170B	transmembrane protein 170B	FTO	FTO, alpha-ketoglutarate dependent dioxygenase	PIK3R5	phosphoinositide-3-kinase regulatory subunit 5	STK26	serine/threonine kinase 26	LYRM7	LYR motif containing 7	KCNK9	potassium two pore domain channel subfamily K member 9	ZNF675	zinc finger protein 675
GRPEL2	GrpE like 2, mitochondrial			ABLIM1	actin binding LIM protein 1	RFPL3	ret finger protein like 3			TMEM182	transmembrane protein 182	STXBP5	syntaxin binding protein 5	STXBP5	syntaxin binding protein 5	PCDHGB6	protocadherin gamma subfamily B, 6			CCDC178	coiled-coil domain containing 178	PLPPR4	phospholipid phosphatase related 4	ABCA6	ATP binding cassette subfamily A member 6	PRRG3	proline rich and Gla domain 3	FTO	FTO, alpha-ketoglutarate dependent dioxygenase			LRBA	LPS responsive beige-like anchor protein	MYLK4	myosin light chain kinase family member 4	CLIC4	chloride intracellular channel 4	ZNF831	zinc finger protein 831	PKHD1	PKHD1, fibrocystin/polyductin	STARD8	StAR related lipid transfer domain containing 8	AP1G1	adaptor related protein complex 1 subunit gamma 1	CDIP1	cell death inducing p53 target 1	UBXN7	UBX domain protein 7
UNC5C	unc-5 netrin receptor C			TCF21	transcription factor 21	GRIK2	glutamate ionotropic receptor kainate type subunit 2			PDIK1L	PDLIM1 interacting kinase 1 like	TMEM198	transmembrane protein 198	TMEM198	transmembrane protein 198	PCDHGB5	protocadherin gamma subfamily B, 5			SH3PXD2A	SH3 and PX domains 2A	NETO2	neuropilin and tolloid like 2	CSDC2	cold shock domain containing C2	MTERF3	mitochondrial transcription termination factor 3	EEF2K	eukaryotic elongation factor 2 kinase			ANKRD20A1	ankyrin repeat domain 20 family member A1	HPSE	heparanase	HOOK3	hook microtubule tethering protein 3	PSD2	pleckstrin and Sec7 domain containing 2	SOCS4	suppressor of cytokine signaling 4	GCNT1	glucosaminyl (N-acetyl) transferase 1	CCNY	cyclin Y	USP12	ubiquitin specific peptidase 12	DHFR2	dihydrofolate reductase 2
GNPNAT1	glucosamine-phosphate N-acetyltransferase 1			NAA60	N(alpha)-acetyltransferase 60, NatF catalytic subunit	OAZ1	ornithine decarboxylase antizyme 1			P2RX7	purinergic receptor P2X 7	CORIN	corin, serine peptidase	CORIN	corin, serine peptidase	PCDHGB2	protocadherin gamma subfamily B, 2			STAR	steroidogenic acute regulatory protein	FOXL2NB	FOXL2 neighbor	ANO1	anoctamin 1	ZNF37A	zinc finger protein 37A	SLC23A2	solute carrier family 23 member 2			ANKRD20A2	ankyrin repeat domain 20 family member A2	B9D1	B9 domain containing 1	ANKRD42	ankyrin repeat domain 42	AFG3L2	AFG3 like matrix AAA peptidase subunit 2	CPA3	carboxypeptidase A3	MICAL2	microtubule associated monooxygenase, calponin and LIM domain containing 2	TLK1	tousled like kinase 1	POU3F1	POU class 3 homeobox 1	HGF	hepatocyte growth factor
FSTL1	follistatin like 1			NOS1	nitric oxide synthase 1	ALDOC	aldolase, fructose-bisphosphate C			PHF5A	PHD finger protein 5A	UBP1	upstream binding protein 1	UBP1	upstream binding protein 1	PCDHGB1	protocadherin gamma subfamily B, 1			LRP8	LDL receptor related protein 8	DGKE	diacylglycerol kinase epsilon	PLA2G15	phospholipase A2 group XV	ITGBL1	integrin subunit beta like 1	PSMA5	proteasome subunit alpha 5			SENP7	SUMO specific peptidase 7	PIWIL2	piwi like RNA-mediated gene silencing 2	CYBRD1	cytochrome b reductase 1	ABHD2	abhydrolase domain containing 2	BMP7	bone morphogenetic protein 7	ANKRD45	ankyrin repeat domain 45	PSMD12	proteasome 26S subunit, non-ATPase 12	MSMO1	methylsterol monooxygenase 1	LINGO2	leucine rich repeat and Ig domain containing 2
YBEY	ybeY metalloendoribonuclease			TSHZ3	teashirt zinc finger homeobox 3	FAT3	FAT atypical cadherin 3			GBF1	golgi brefeldin A resistant guanine nucleotide exchange factor 1	ZNF148	zinc finger protein 148	ZNF148	zinc finger protein 148	PCDHGA6	protocadherin gamma subfamily A, 6			TNFSF15	TNF superfamily member 15	IL6ST	interleukin 6 signal transducer	MAN1A2	mannosidase alpha class 1A member 2	LCP2	lymphocyte cytosolic protein 2	PAPPA	pappalysin 1			ANTXR2	ANTXR cell adhesion molecule 2	DCP2	decapping mRNA 2	ST3GAL1	ST3 beta-galactoside alpha-2,3-sialyltransferase 1	RICTOR	RPTOR independent companion of MTOR complex 2	KCNG3	potassium voltage-gated channel modifier subfamily G member 3	JARID2	jumonji and AT-rich interaction domain containing 2	BCCIP	BRCA2 and CDKN1A interacting protein	ZNF169	zinc finger protein 169	MSR1	macrophage scavenger receptor 1
RTL9	retrotransposon Gag like 9			HTT	huntingtin	FASTKD1	FAST kinase domains 1			C11orf91	chromosome 11 open reading frame 91	LIMCH1	LIM and calponin homology domains 1	LIMCH1	LIM and calponin homology domains 1	PCDHGA4	protocadherin gamma subfamily A, 4			BBX	BBX, HMG-box containing	ZNF417	zinc finger protein 417	LBH	limb bud and heart development	ADAT2	adenosine deaminase, tRNA specific 2	PSD2	pleckstrin and Sec7 domain containing 2			KLF3	Kruppel like factor 3	STX6	syntaxin 6	KLHL4	kelch like family member 4	SLC23A2	solute carrier family 23 member 2	PHACTR2	phosphatase and actin regulator 2	PLAT	plasminogen activator, tissue type	SUZ12	SUZ12, polycomb repressive complex 2 subunit	ATOX1	antioxidant 1 copper chaperone	HTR5A	5-hydroxytryptamine receptor 5A
CACNB2	calcium voltage-gated channel auxiliary subunit beta 2			GRID2	glutamate ionotropic receptor delta type subunit 2	TATDN3	TatD DNase domain containing 3			COBLL1	cordon-bleu WH2 repeat protein like 1	ZNF275	zinc finger protein 275	ZNF275	zinc finger protein 275	PCDHGB4	protocadherin gamma subfamily B, 4			SLC35F1	solute carrier family 35 member F1	TRIP12	thyroid hormone receptor interactor 12	MYBPC3	myosin binding protein C, cardiac	MYT1	myelin transcription factor 1	FKBP4	FKBP prolyl isomerase 4			DPYSL2	dihydropyrimidinase like 2	CNDP1	carnosine dipeptidase 1	PDZRN4	PDZ domain containing ring finger 4	PSMA5	proteasome subunit alpha 5	STMP1	short transmembrane mitochondrial protein 1	CHST6	carbohydrate sulfotransferase 6	CSNK1A1	casein kinase 1 alpha 1	DLG2	discs large MAGUK scaffold protein 2	CNOT1	CCR4-NOT transcription complex subunit 1
RECK	reversion inducing cysteine rich protein with kazal motifs			G6PC2	glucose-6-phosphatase catalytic subunit 2	DCUN1D5	defective in cullin neddylation 1 domain containing 5			MIEF2	mitochondrial elongation factor 2	RPS6KA1	ribosomal protein S6 kinase A1	RPS6KA1	ribosomal protein S6 kinase A1	PHF3	PHD finger protein 3			KLF8	Kruppel like factor 8	FAM241A	family with sequence similarity 241 member A	RFTN1	raftlin, lipid raft linker 1	OGN	osteoglycin	ZCCHC14	zinc finger CCHC-type containing 14			PLXNA4	plexin A4	GPR65	G protein-coupled receptor 65	SPOPL	speckle type BTB/POZ protein like	PAPPA	pappalysin 1	ITGAV	integrin subunit alpha V	LMNB1	lamin B1	MACROD2	MACRO domain containing 2	TRRAP	transformation/transcription domain associated protein	SLC10A6	solute carrier family 10 member 6
CDC42SE2	CDC42 small effector 2			SLC12A3	solute carrier family 12 member 3	LYSMD3	LysM domain containing 3			MC5R	melanocortin 5 receptor	KIAA0930	KIAA0930	KIAA0930	KIAA0930	FAM78A	family with sequence similarity 78 member A			ZNF75A	zinc finger protein 75a	NR2E1	nuclear receptor subfamily 2 group E member 1	DCAF17	DDB1 and CUL4 associated factor 17	KLF12	Kruppel like factor 12	CRIP3	cysteine rich protein 3			PDE3B	phosphodiesterase 3B	CACNB2	calcium voltage-gated channel auxiliary subunit beta 2	POLR2C	RNA polymerase II subunit C	MMP14	matrix metallopeptidase 14	CLCF1	cardiotrophin like cytokine factor 1	BCL11A	BCL11A, BAF complex component	CITED2	Cbp/p300 interacting transactivator with Glu/Asp rich carboxy-terminal domain 2	ATP6AP1	ATPase H+ transporting accessory protein 1	COL4A4	collagen type IV alpha 4 chain
ZC3H13	zinc finger CCCH-type containing 13			SLC25A17	solute carrier family 25 member 17	USP15	ubiquitin specific peptidase 15			USP10	ubiquitin specific peptidase 10	ARRDC3	arrestin domain containing 3	ARRDC3	arrestin domain containing 3	PDIK1L	PDLIM1 interacting kinase 1 like			ARHGAP1	Rho GTPase activating protein 1	TIAL1	TIA1 cytotoxic granule associated RNA binding protein like 1	LMOD3	leiomodin 3	GBP5	guanylate binding protein 5	MPZ	myelin protein zero			NCAM2	neural cell adhesion molecule 2	CFAP52	cilia and flagella associated protein 52	PPA2	pyrophosphatase (inorganic) 2	FKBP4	FKBP prolyl isomerase 4	SLC1A3	solute carrier family 1 member 3	HPGDS	hematopoietic prostaglandin D synthase	RNF170	ring finger protein 170	FEM1B	fem-1 homolog B	ITGBL1	integrin subunit beta like 1
N4BP2	NEDD4 binding protein 2			VTI1A	vesicle transport through interaction with t-SNAREs 1A	VDAC2	voltage dependent anion channel 2			TMTC4	transmembrane and tetratricopeptide repeat containing 4	SCN8A	sodium voltage-gated channel alpha subunit 8	SCN8A	sodium voltage-gated channel alpha subunit 8	KIAA0895	KIAA0895			RNLS	renalase, FAD dependent amine oxidase	NAALADL2	N-acetylated alpha-linked acidic dipeptidase like 2	SPICE1	spindle and centriole associated protein 1	ADAMTS19	ADAM metallopeptidase with thrombospondin type 1 motif 19	FAN1	FANCD2 and FANCI associated nuclease 1			LETM2	leucine zipper and EF-hand containing transmembrane protein 2	DOCK3	dedicator of cytokinesis 3	CLEC12B	C-type lectin domain family 12 member B	SLC26A9	solute carrier family 26 member 9	EBF1	EBF transcription factor 1	TNFSF14	TNF superfamily member 14	EPM2AIP1	EPM2A interacting protein 1	ARIH2	ariadne RBR E3 ubiquitin protein ligase 2	GLRB	glycine receptor beta
BRF2	BRF2, RNA polymerase III transcription initiation factor subunit			TPK1	thiamin pyrophosphokinase 1	SETDB2	SET domain bifurcated histone lysine methyltransferase 2			ADAMTS5	ADAM metallopeptidase with thrombospondin type 1 motif 5	GNAI2	G protein subunit alpha i2	GNAI2	G protein subunit alpha i2	MBNL1	muscleblind like splicing regulator 1			CHM	CHM, Rab escort protein 1	SEMA3C	semaphorin 3C	MKX	mohawk homeobox	BCLAF1	BCL2 associated transcription factor 1	CACNA2D1	calcium voltage-gated channel auxiliary subunit alpha2delta 1			GTF2B	general transcription factor IIB	INO80D	INO80 complex subunit D	SREK1IP1	SREK1 interacting protein 1	ZCCHC14	zinc finger CCHC-type containing 14	METTL16	methyltransferase like 16	GLUL	glutamate-ammonia ligase	SLC16A7	solute carrier family 16 member 7	INSM2	INSM transcriptional repressor 2	TFAP4	transcription factor AP-4
ZNF350	zinc finger protein 350			PAX5	paired box 5	SAMD12	sterile alpha motif domain containing 12			PRRT4	proline rich transmembrane protein 4	PDE7B	phosphodiesterase 7B	PDE7B	phosphodiesterase 7B	MTF2	metal response element binding transcription factor 2			SMG7	SMG7, nonsense mediated mRNA decay factor	EGLN3	egl-9 family hypoxia inducible factor 3	HES2	hes family bHLH transcription factor 2	ARL5B	ADP ribosylation factor like GTPase 5B	TTYH3	tweety family member 3			SEC14L1	SEC14 like lipid binding 1	SEC13	SEC13 homolog, nuclear pore and COPII coat complex component	PTPN11	protein tyrosine phosphatase, non-receptor type 11	CRIP3	cysteine rich protein 3	STRN	striatin	MAVS	mitochondrial antiviral signaling protein	PLCB1	phospholipase C beta 1	LANCL1	LanC like 1	PSD3	pleckstrin and Sec7 domain containing 3
NREP	neuronal regeneration related protein			KRTAP26-1	keratin associated protein 26-1	ATP2C1	ATPase secretory pathway Ca2+ transporting 1			COLQ	collagen like tail subunit of asymmetric acetylcholinesterase	SORBS2	sorbin and SH3 domain containing 2	SORBS2	sorbin and SH3 domain containing 2	L3MBTL4	L3MBTL4, histone methyl-lysine binding protein			IL6ST	interleukin 6 signal transducer	INTS10	integrator complex subunit 10	DHFR2	dihydrofolate reductase 2	RWDD3	RWD domain containing 3	CD200	CD200 molecule			PLXNA2	plexin A2	SHISA6	shisa family member 6	SYAP1	synapse associated protein 1	MPZ	myelin protein zero	SPX	spexin hormone	NAA16	N(alpha)-acetyltransferase 16, NatA auxiliary subunit	MAP3K5	mitogen-activated protein kinase kinase kinase 5	REEP4	receptor accessory protein 4	PARD3	par-3 family cell polarity regulator
SLC41A1	solute carrier family 41 member 1			IL1RL1	interleukin 1 receptor like 1	ZC3H12B	zinc finger CCCH-type containing 12B			ARRB1	arrestin beta 1	PIP4K2C	phosphatidylinositol-5-phosphate 4-kinase type 2 gamma	PIP4K2C	phosphatidylinositol-5-phosphate 4-kinase type 2 gamma	ITGB6	integrin subunit beta 6			CRTAP	cartilage associated protein	LRRC28	leucine rich repeat containing 28	PMEPA1	prostate transmembrane protein, androgen induced 1	IL1RL1	interleukin 1 receptor like 1	ENTPD1	ectonucleoside triphosphate diphosphohydrolase 1			ZNF384	zinc finger protein 384	MSC	musculin	CLDN16	claudin 16	GATD1	glutamine amidotransferase like class 1 domain containing 1	WDHD1	WD repeat and HMG-box DNA binding protein 1	LRRC19	leucine rich repeat containing 19	MKLN1	muskelin 1	MLLT11	MLLT11, transcription factor 7 cofactor	CHAC1	ChaC glutathione specific gamma-glutamylcyclotransferase 1
COL18A1	collagen type XVIII alpha 1 chain			NDST1	N-deacetylase and N-sulfotransferase 1	UBE2G1	ubiquitin conjugating enzyme E2 G1			ROCK2	Rho associated coiled-coil containing protein kinase 2	RPRD1B	regulation of nuclear pre-mRNA domain containing 1B	RPRD1B	regulation of nuclear pre-mRNA domain containing 1B	FOXP1	forkhead box P1			KMT5B	lysine methyltransferase 5B	POLR2A	RNA polymerase II subunit A	CADPS2	calcium dependent secretion activator 2	ZBTB10	zinc finger and BTB domain containing 10	FBXL12	F-box and leucine rich repeat protein 12			JAG1	jagged 1	KY	kyphoscoliosis peptidase	PICALM	phosphatidylinositol binding clathrin assembly protein	FAN1	FANCD2 and FANCI associated nuclease 1	RANBP10	RAN binding protein 10	HSCB	HscB mitochondrial iron-sulfur cluster cochaperone	SLC35E2A	solute carrier family 35 member E2A	RAB15	RAB15, member RAS oncogene family	PRKAR2B	protein kinase cAMP-dependent type II regulatory subunit beta
FKBP5	FKBP prolyl isomerase 5			BMPR1B	bone morphogenetic protein receptor type 1B	ATP8B1	ATPase phospholipid transporting 8B1			VSTM2L	V-set and transmembrane domain containing 2 like	SLC6A8	solute carrier family 6 member 8	SLC6A8	solute carrier family 6 member 8	KLF10	Kruppel like factor 10			MDH1B	malate dehydrogenase 1B	BLM	BLM RecQ like helicase	IGF1	insulin like growth factor 1	SH3BP5	SH3 domain binding protein 5	GAB2	GRB2 associated binding protein 2			PCDH8	protocadherin 8	RTTN	rotatin	IL1RL1	interleukin 1 receptor like 1	CACNA2D1	calcium voltage-gated channel auxiliary subunit alpha2delta 1	TAF9B	TATA-box binding protein associated factor 9b	SMG1	SMG1, nonsense mediated mRNA decay associated PI3K related kinase	ZMYM5	zinc finger MYM-type containing 5	SRGAP3	SLIT-ROBO Rho GTPase activating protein 3	MATN2	matrilin 2
UBE2G2	ubiquitin conjugating enzyme E2 G2			SH3BGRL2	SH3 domain binding glutamate rich protein like 2	TAOK1	TAO kinase 1			DUSP16	dual specificity phosphatase 16	FAM169A	family with sequence similarity 169 member A	FAM169A	family with sequence similarity 169 member A	ZNF154	zinc finger protein 154			IRAK1	interleukin 1 receptor associated kinase 1	ZNF587	zinc finger protein 587	ZNF302	zinc finger protein 302	TUBAL3	tubulin alpha like 3	MMP14	matrix metallopeptidase 14			XYLT1	xylosyltransferase 1	VANGL1	VANGL planar cell polarity protein 1	SLC35D3	solute carrier family 35 member D3	FBXL12	F-box and leucine rich repeat protein 12	DGKH	diacylglycerol kinase eta	EIF2A	eukaryotic translation initiation factor 2A	RPF2	ribosome production factor 2 homolog	OTUD6A	OTU deubiquitinase 6A	PRKAA1	protein kinase AMP-activated catalytic subunit alpha 1
SAE1	SUMO1 activating enzyme subunit 1			G0S2	G0/G1 switch 2	SLC35A5	solute carrier family 35 member A5			PAN3	poly(A) specific ribonuclease subunit PAN3	LPAR4	lysophosphatidic acid receptor 4	LPAR4	lysophosphatidic acid receptor 4	FKBP4	FKBP prolyl isomerase 4			MRPL17	mitochondrial ribosomal protein L17	JAZF1	JAZF zinc finger 1	PPP2R5C	protein phosphatase 2 regulatory subunit B'gamma	JUN	Jun proto-oncogene, AP-1 transcription factor subunit	SDC3	syndecan 3			DCAF7	DDB1 and CUL4 associated factor 7	ABI2	abl interactor 2	DENND1A	DENN domain containing 1A	GAB2	GRB2 associated binding protein 2	PKD2	polycystin 2, transient receptor potential cation channel	ZFP14	ZFP14 zinc finger protein	QSER1	glutamine and serine rich 1	LRIT3	leucine rich repeat, Ig-like and transmembrane domains 3	TBCCD1	TBCC domain containing 1
INHBA	inhibin subunit beta A			SERP1	stress associated endoplasmic reticulum protein 1	AMOTL1	angiomotin like 1			ARHGAP42	Rho GTPase activating protein 42	CCDC85C	coiled-coil domain containing 85C	CCDC85C	coiled-coil domain containing 85C	IL11	interleukin 11			ZNF468	zinc finger protein 468	CDKL4	cyclin dependent kinase like 4	GRM3	glutamate metabotropic receptor 3	KCTD15	potassium channel tetramerization domain containing 15	MAPKAP1	mitogen-activated protein kinase associated protein 1			OCRL	OCRL, inositol polyphosphate-5-phosphatase	DHRSX	dehydrogenase/reductase X-linked	CD40	CD40 molecule	CD200	CD200 molecule	TTC14	tetratricopeptide repeat domain 14	ARMC6	armadillo repeat containing 6	ENOPH1	enolase-phosphatase 1	ZNF709	zinc finger protein 709	HGSNAT	heparan-alpha-glucosaminide N-acetyltransferase
CDH17	cadherin 17			CALB1	calbindin 1	CADM2	cell adhesion molecule 2			ITGB3BP	integrin subunit beta 3 binding protein	PTPN4	protein tyrosine phosphatase, non-receptor type 4	PTPN4	protein tyrosine phosphatase, non-receptor type 4	PLCXD1	phosphatidylinositol specific phospholipase C X domain containing 1			DPH6	diphthamine biosynthesis 6	RRP15	ribosomal RNA processing 15 homolog	RIMKLB	ribosomal modification protein rimK like family member B	SLC35C1	solute carrier family 35 member C1	GNAL	G protein subunit alpha L			CSTF1	cleavage stimulation factor subunit 1	KCNE5	potassium voltage-gated channel subfamily E regulatory subunit 5	ARPP19	cAMP regulated phosphoprotein 19	PAPLN	papilin, proteoglycan like sulfated glycoprotein	CBFB	core-binding factor subunit beta	ACYP1	acylphosphatase 1	NKAIN2	sodium/potassium transporting ATPase interacting 2	GPATCH2L	G-patch domain containing 2 like	TOX	thymocyte selection associated high mobility group box
ARG2	arginase 2			SAXO2	stabilizer of axonemal microtubules 2	TRNT1	tRNA nucleotidyl transferase 1			MBNL3	muscleblind like splicing regulator 3	KDM5A	lysine demethylase 5A	KDM5A	lysine demethylase 5A	AQP8	aquaporin 8			STX3	syntaxin 3	RSBN1	round spermatid basic protein 1	GID4	GID complex subunit 4 homolog	ARID1A	AT-rich interaction domain 1A	EIF4A1	eukaryotic translation initiation factor 4A1			CD99	CD99 molecule (Xg blood group)	AKIRIN1	akirin 1	PALMD	palmdelphin	SLC35F6	solute carrier family 35 member F6	2007-09-01	septin 7	CA8	carbonic anhydrase 8	PPAT	phosphoribosyl pyrophosphate amidotransferase	XPR1	xenotropic and polytropic retrovirus receptor 1	LCLAT1	lysocardiolipin acyltransferase 1
POU3F2	POU class 3 homeobox 2			MLEC	malectin	MAN1A1	mannosidase alpha class 1A member 1			THRB	thyroid hormone receptor beta	ZSCAN22	zinc finger and SCAN domain containing 22	ZSCAN22	zinc finger and SCAN domain containing 22	CASP2	caspase 2			CLCN6	chloride voltage-gated channel 6	SLC12A2	solute carrier family 12 member 2	RPA1	replication protein A1	ZBTB20	zinc finger and BTB domain containing 20	NIPAL4	NIPA like domain containing 4			CASP8AP2	caspase 8 associated protein 2	RPAP2	RNA polymerase II associated protein 2	LIN7C	lin-7 homolog C, crumbs cell polarity complex component	GJB2	gap junction protein beta 2	RUNX1	runt related transcription factor 1	GATA3	GATA binding protein 3	ILDR2	immunoglobulin like domain containing receptor 2	PLCXD3	phosphatidylinositol specific phospholipase C X domain containing 3	SNX6	sorting nexin 6
ERVH48-1	endogenous retrovirus group 48 member 1			PILRB	paired immunoglobin-like type 2 receptor beta	SMC2	structural maintenance of chromosomes 2			MAP3K7	mitogen-activated protein kinase kinase kinase 7	APPBP2	amyloid beta precursor protein binding protein 2	APPBP2	amyloid beta precursor protein binding protein 2	YBEY	ybeY metalloendoribonuclease			ZNF618	zinc finger protein 618	PEX11B	peroxisomal biogenesis factor 11 beta	DYNLT3	dynein light chain Tctex-type 3	CA3	carbonic anhydrase 3	TMEM104	transmembrane protein 104			CCDC126	coiled-coil domain containing 126	CLCN3	chloride voltage-gated channel 3	ZNF614	zinc finger protein 614	MAPKAP1	mitogen-activated protein kinase associated protein 1	UBN1	ubinuclein 1	METTL2A	methyltransferase like 2A	COMMD8	COMM domain containing 8	CAMK2D	calcium/calmodulin dependent protein kinase II delta	IKZF2	IKAROS family zinc finger 2
HSPA4L	heat shock protein family A (Hsp70) member 4 like			XK	X-linked Kx blood group	ZC3H12C	zinc finger CCCH-type containing 12C			ANKRD28	ankyrin repeat domain 28	NFIB	nuclear factor I B	NFIB	nuclear factor I B	CEP97	centrosomal protein 97			C17orf78	chromosome 17 open reading frame 78	SSPN	sarcospan	RC3H1	ring finger and CCCH-type domains 1	CDKL1	cyclin dependent kinase like 1	PAPLN	papilin, proteoglycan like sulfated glycoprotein			CERS6	ceramide synthase 6	HEATR1	HEAT repeat containing 1	HEXB	hexosaminidase subunit beta	SDC3	syndecan 3	UBE3D	ubiquitin protein ligase E3D	BFAR	bifunctional apoptosis regulator	VPS35	VPS35, retromer complex component	LCT	lactase	SSH1	slingshot protein phosphatase 1
GDAP2	ganglioside induced differentiation associated protein 2			ST8SIA4	ST8 alpha-N-acetyl-neuraminide alpha-2,8-sialyltransferase 4	ZNF12	zinc finger protein 12			LMF1	lipase maturation factor 1	RAD51D	RAD51 paralog D	RAD51D	RAD51 paralog D	CTCFL	CCCTC-binding factor like			TMA16	translation machinery associated 16 homolog	CIPC	CLOCK interacting pacemaker	TRPC3	transient receptor potential cation channel subfamily C member 3	FAM167A	family with sequence similarity 167 member A	GATD1	glutamine amidotransferase like class 1 domain containing 1			BUB1	BUB1 mitotic checkpoint serine/threonine kinase	DDX47	DEAD-box helicase 47	ADORA3	adenosine A3 receptor	GNAL	G protein subunit alpha L	BTBD3	BTB domain containing 3	SLC35F4	solute carrier family 35 member F4	RASGRF2	Ras protein specific guanine nucleotide releasing factor 2	C9orf66	chromosome 9 open reading frame 66	CYTH2	cytohesin 2
RSBN1	round spermatid basic protein 1			GON4L	gon-4 like	PMP2	peripheral myelin protein 2			SFSWAP	splicing factor SWAP	SERTAD4	SERTA domain containing 4	SERTAD4	SERTA domain containing 4	PPP1R10	protein phosphatase 1 regulatory subunit 10			ARMC8	armadillo repeat containing 8	PLOD2	procollagen-lysine,2-oxoglutarate 5-dioxygenase 2	PRKAA2	protein kinase AMP-activated catalytic subunit alpha 2	GAS2	growth arrest specific 2	MINDY3	MINDY lysine 48 deubiquitinase 3			PWWP3B	PWWP domain containing 3B	FAM155B	family with sequence similarity 155 member B	KRTAP22-2	keratin associated protein 22-2	ZBTB3	zinc finger and BTB domain containing 3	OTUD1	OTU deubiquitinase 1	BMF	Bcl2 modifying factor	BARD1	BRCA1 associated RING domain 1	ELFN2	extracellular leucine rich repeat and fibronectin type III domain containing 2	LMBR1	limb development membrane protein 1
CCR1	C-C motif chemokine receptor 1			LDHAL6B	lactate dehydrogenase A like 6B	RBBP4	RB binding protein 4, chromatin remodeling factor			PLXNB2	plexin B2	KLHL18	kelch like family member 18	KLHL18	kelch like family member 18	FAM192A	family with sequence similarity 192 member A			ZNF287	zinc finger protein 287	CTAGE4	CTAGE family member 4	MECP2	methyl-CpG binding protein 2	IKZF2	IKAROS family zinc finger 2	ASB12	ankyrin repeat and SOCS box containing 12			SLX4IP	SLX4 interacting protein	PHTF2	putative homeodomain transcription factor 2	IFIT5	interferon induced protein with tetratricopeptide repeats 5	ENTPD1	ectonucleoside triphosphate diphosphohydrolase 1	GIT2	GIT ArfGAP 2	MTF2	metal response element binding transcription factor 2	TTC39C	tetratricopeptide repeat domain 39C	SCN2B	sodium voltage-gated channel beta subunit 2	CNOT6L	CCR4-NOT transcription complex subunit 6 like
NCOR1	nuclear receptor corepressor 1			CREBZF	CREB/ATF bZIP transcription factor	OLIG2	oligodendrocyte transcription factor 2			MXI1	MAX interactor 1, dimerization protein	ROCK2	Rho associated coiled-coil containing protein kinase 2	ROCK2	Rho associated coiled-coil containing protein kinase 2	EPHB2	EPH receptor B2			MOSMO	modulator of smoothened	CTAGE8	CTAGE family member 8	DEPDC1	DEP domain containing 1	MBNL3	muscleblind like splicing regulator 3	ZBTB3	zinc finger and BTB domain containing 3			ATP8A1	ATPase phospholipid transporting 8A1	IGF2R	insulin like growth factor 2 receptor	PDIK1L	PDLIM1 interacting kinase 1 like	EIF4A1	eukaryotic translation initiation factor 4A1	CACNA2D1	calcium voltage-gated channel auxiliary subunit alpha2delta 1	RPA1	replication protein A1	EPS15	epidermal growth factor receptor pathway substrate 15	MED14	mediator complex subunit 14	STRN3	striatin 3
DPY19L3	dpy-19 like C-mannosyltransferase 3			ANKRD27	ankyrin repeat domain 27	SEC24B	SEC24 homolog B, COPII coat complex component			TIPARP	TCDD inducible poly(ADP-ribose) polymerase	PTK2	protein tyrosine kinase 2	PTK2	protein tyrosine kinase 2	CDIP1	cell death inducing p53 target 1			KIAA0355	KIAA0355	CTAGE9	CTAGE family member 9	RCN3	reticulocalbin 3	TLE4	TLE family member 4, transcriptional corepressor	STOX2	storkhead box 2			ZBTB20	zinc finger and BTB domain containing 20	KLF12	Kruppel like factor 12	NR5A2	nuclear receptor subfamily 5 group A member 2	NIPAL4	NIPA like domain containing 4	PTEN	phosphatase and tensin homolog	PDE4D	phosphodiesterase 4D	EVI2B	ecotropic viral integration site 2B	CREB3L2	cAMP responsive element binding protein 3 like 2	COL4A3	collagen type IV alpha 3 chain
CD33	CD33 molecule			CNTNAP2	contactin associated protein like 2	CCNY	cyclin Y			COL4A3	collagen type IV alpha 3 chain	TTLL12	tubulin tyrosine ligase like 12	TTLL12	tubulin tyrosine ligase like 12	LMAN2L	lectin, mannose binding 2 like			TMEM236	transmembrane protein 236	BCL11B	BCL11B, BAF complex component	APOL6	apolipoprotein L6	MTDH	metadherin	RNF24	ring finger protein 24			NKAPL	NFKB activating protein like	AFF2	AF4/FMR2 family member 2	RPF2	ribosome production factor 2 homolog	TMEM104	transmembrane protein 104	ZNF431	zinc finger protein 431	TMEM248	transmembrane protein 248	SCAI	suppressor of cancer cell invasion	CLMN	calmin	MLEC	malectin
ITGA8	integrin subunit alpha 8			PSMA8	proteasome subunit alpha 8	BRCC3	BRCA1/BRCA2-containing complex subunit 3			ADGRL3	adhesion G protein-coupled receptor L3	JAZF1	JAZF zinc finger 1	JAZF1	JAZF zinc finger 1	RAP1GAP	RAP1 GTPase activating protein			EBF2	EBF transcription factor 2	PCK1	phosphoenolpyruvate carboxykinase 1	FZD3	frizzled class receptor 3	INPP5F	inositol polyphosphate-5-phosphatase F	RPS6KA3	ribosomal protein S6 kinase A3			TMEFF2	transmembrane protein with EGF like and two follistatin like domains 2	SNRNP200	small nuclear ribonucleoprotein U5 subunit 200	TNPO1	transportin 1	MINDY3	MINDY lysine 48 deubiquitinase 3	KLHDC10	kelch domain containing 10	ENTPD5	ectonucleoside triphosphate diphosphohydrolase 5	C21orf91	chromosome 21 open reading frame 91	GRAMD1B	GRAM domain containing 1B	ZNF473	zinc finger protein 473
RNF169	ring finger protein 169			PCYOX1	prenylcysteine oxidase 1	STON2	stonin 2			SH2B3	SH2B adaptor protein 3	PAPPA	pappalysin 1	PAPPA	pappalysin 1	PLET1	placenta expressed transcript 1			ZNF547	zinc finger protein 547	GAS1	growth arrest specific 1	CCDC167	coiled-coil domain containing 167	NOA1	nitric oxide associated 1	CYP11B1	cytochrome P450 family 11 subfamily B member 1			MAP3K7CL	MAP3K7 C-terminal like	SLC7A11	solute carrier family 7 member 11	MBNL2	muscleblind like splicing regulator 2	ASB12	ankyrin repeat and SOCS box containing 12	KIAA1841	KIAA1841	PHF12	PHD finger protein 12	TAF11	TATA-box binding protein associated factor 11	SH3TC2	SH3 domain and tetratricopeptide repeats 2	SMAD7	SMAD family member 7
NOLC1	nucleolar and coiled-body phosphoprotein 1			ARHGAP11A	Rho GTPase activating protein 11A	EPHA4	EPH receptor A4			THAP1	THAP domain containing 1	TEAD1	TEA domain transcription factor 1	TEAD1	TEA domain transcription factor 1	ALDH3B2	aldehyde dehydrogenase 3 family member B2			ZBBX	zinc finger B-box domain containing	SLC25A36	solute carrier family 25 member 36	PRKACB	protein kinase cAMP-activated catalytic subunit beta	ANKS1A	ankyrin repeat and sterile alpha motif domain containing 1A	SLC26A9	solute carrier family 26 member 9			DISC1	DISC1 scaffold protein	HNF4A	hepatocyte nuclear factor 4 alpha	COL23A1	collagen type XXIII alpha 1 chain	CYP11B1	cytochrome P450 family 11 subfamily B member 1	NCALD	neurocalcin delta	COPA	coatomer protein complex subunit alpha	TSPAN2	tetraspanin 2	FAM222A	family with sequence similarity 222 member A	BCORL1	BCL6 corepressor like 1
ZNF37A	zinc finger protein 37A			GDAP1L1	ganglioside induced differentiation associated protein 1 like 1	ICE2	interactor of little elongation complex ELL subunit 2			RAPGEF4	Rap guanine nucleotide exchange factor 4	SEH1L	SEH1 like nucleoporin	SEH1L	SEH1 like nucleoporin	IP6K1	inositol hexakisphosphate kinase 1			MYCL	MYCL proto-oncogene, bHLH transcription factor	KCNN3	potassium calcium-activated channel subfamily N member 3	CYTIP	cytohesin 1 interacting protein	ERMN	ermin	PLIN3	perilipin 3			ADAM18	ADAM metallopeptidase domain 18	TEAD1	TEA domain transcription factor 1	PRPSAP1	phosphoribosyl pyrophosphate synthetase associated protein 1	STOX2	storkhead box 2	CDH6	cadherin 6	MSL1	MSL complex subunit 1	SOX2	SRY-box 2	BLMH	bleomycin hydrolase	EIF4EBP2	eukaryotic translation initiation factor 4E binding protein 2
ZFP62	ZFP62 zinc finger protein			FAM57A	family with sequence similarity 57 member A	GFRA1	GDNF family receptor alpha 1			LCOR	ligand dependent nuclear receptor corepressor	SEZ6L2	seizure related 6 homolog like 2	SEZ6L2	seizure related 6 homolog like 2	PPARGC1B	PPARG coactivator 1 beta			PAPSS2	3'-phosphoadenosine 5'-phosphosulfate synthase 2	PIK3CA	phosphatidylinositol-4,5-bisphosphate 3-kinase catalytic subunit alpha	MRPL47	mitochondrial ribosomal protein L47	WASHC2C	WASH complex subunit 2C	ARHGDIA	Rho GDP dissociation inhibitor alpha			CCSER1	coiled-coil serine rich protein 1	SIX1	SIX homeobox 1	OGA	O-GlcNAcase	UBA52	ubiquitin A-52 residue ribosomal protein fusion product 1	CLEC1A	C-type lectin domain family 1 member A	SYAP1	synapse associated protein 1	OSER1	oxidative stress responsive serine rich 1	TMEM25	transmembrane protein 25	RHOQ	ras homolog family member Q
ANKRD49	ankyrin repeat domain 49			JPT2	Jupiter microtubule associated homolog 2	RPS3	ribosomal protein S3			PPM1A	protein phosphatase, Mg2+/Mn2+ dependent 1A	NKAIN1	sodium/potassium transporting ATPase interacting 1	NKAIN1	sodium/potassium transporting ATPase interacting 1	EPHB1	EPH receptor B1			UBE2W	ubiquitin conjugating enzyme E2 W	ZNF850	zinc finger protein 850	DCAF12L1	DDB1 and CUL4 associated factor 12 like 1	MAPK14	mitogen-activated protein kinase 14	CAPN5	calpain 5			FLRT2	fibronectin leucine rich transmembrane protein 2	PMPCB	peptidase, mitochondrial processing beta subunit	PDS5A	PDS5 cohesin associated factor A	TTC31	tetratricopeptide repeat domain 31	C15orf41	chromosome 15 open reading frame 41	C2orf76	chromosome 2 open reading frame 76	TMEM170B	transmembrane protein 170B	RAB5A	RAB5A, member RAS oncogene family	SCGB2B2	secretoglobin family 2B member 2
GPR173	G protein-coupled receptor 173			FAM91A1	family with sequence similarity 91 member A1	SLC16A9	solute carrier family 16 member 9			CMC2	C-X9-C motif containing 2	AGO4	argonaute RISC catalytic component 4	AGO4	argonaute RISC catalytic component 4	SAMD8	sterile alpha motif domain containing 8			CDH11	cadherin 11	VGLL3	vestigial like family member 3	GAL3ST3	galactose-3-O-sulfotransferase 3	TIPARP	TCDD inducible poly(ADP-ribose) polymerase	SLC35F6	solute carrier family 35 member F6			HDAC2	histone deacetylase 2	C1orf56	chromosome 1 open reading frame 56	LRP6	LDL receptor related protein 6	ARHGDIA	Rho GDP dissociation inhibitor alpha	DNAJC18	DnaJ heat shock protein family (Hsp40) member C18	GOPC	golgi associated PDZ and coiled-coil motif containing	FBXL20	F-box and leucine rich repeat protein 20	PITPNM3	PITPNM family member 3	FRRS1	ferric chelate reductase 1
ORAI2	ORAI calcium release-activated calcium modulator 2			DGKE	diacylglycerol kinase epsilon	MAP1B	microtubule associated protein 1B			KLHDC10	kelch domain containing 10	RASSF8	Ras association domain family member 8	RASSF8	Ras association domain family member 8	DNAH12	dynein axonemal heavy chain 12			PRDM11	PR/SET domain 11	MED13	mediator complex subunit 13	FOXK2	forkhead box K2	FOXO4	forkhead box O4	ZMIZ2	zinc finger MIZ-type containing 2			RBBP6	RB binding protein 6, ubiquitin ligase	FAM206A	family with sequence similarity 206 member A	DIS3	DIS3 homolog, exosome endoribonuclease and 3'-5' exoribonuclease	RNF24	ring finger protein 24	MARK3	microtubule affinity regulating kinase 3	LOC100129697	uncharacterized LOC100129697	FGD4	FYVE, RhoGEF and PH domain containing 4	SHISA6	shisa family member 6	SP3	Sp3 transcription factor
KLHDC8A	kelch domain containing 8A			TFEC	transcription factor EC	SOAT1	sterol O-acyltransferase 1			SLC4A8	solute carrier family 4 member 8	LIN9	lin-9 DREAM MuvB core complex component	LIN9	lin-9 DREAM MuvB core complex component	FAF2	Fas associated factor family member 2			UBASH3B	ubiquitin associated and SH3 domain containing B	PTCHD4	patched domain containing 4	SYNJ2BP	synaptojanin 2 binding protein	GLYR1	glyoxylate reductase 1 homolog	EFNA1	ephrin A1			SLC5A3	solute carrier family 5 member 3	MCAT	malonyl-CoA-acyl carrier protein transacylase	ZNF512B	zinc finger protein 512B	RPS6KA3	ribosomal protein S6 kinase A3	ODF3L1	outer dense fiber of sperm tails 3 like 1	PDHA1	pyruvate dehydrogenase E1 alpha 1 subunit	SIAH2	siah E3 ubiquitin protein ligase 2	GJB1	gap junction protein beta 1	HELQ	helicase, POLQ like
TRIM67	tripartite motif containing 67			MINAR1	membrane integral NOTCH2 associated receptor 1	ECPAS	Ecm29 proteasome adaptor and scaffold			RMND5A	required for meiotic nuclear division 5 homolog A	EZH2	enhancer of zeste 2 polycomb repressive complex 2 subunit	EZH2	enhancer of zeste 2 polycomb repressive complex 2 subunit	CACNA2D2	calcium voltage-gated channel auxiliary subunit alpha2delta 2			EYA3	EYA transcriptional coactivator and phosphatase 3	DCUN1D4	defective in cullin neddylation 1 domain containing 4	CADM2	cell adhesion molecule 2	FAM120A	family with sequence similarity 120A	ARRB1	arrestin beta 1			OTUD6B	OTU domain containing 6B	DGKH	diacylglycerol kinase eta	EIF1AX	eukaryotic translation initiation factor 1A X-linked	PLIN3	perilipin 3	JADE1	jade family PHD finger 1	VLDLR	very low density lipoprotein receptor	CCDC126	coiled-coil domain containing 126	TOR1AIP1	torsin 1A interacting protein 1	DHFR	dihydrofolate reductase
SOX4	SRY-box 4			NLRP9	NLR family pyrin domain containing 9	C5orf64	chromosome 5 open reading frame 64			FAM110B	family with sequence similarity 110 member B	LMAN1	lectin, mannose binding 1	LMAN1	lectin, mannose binding 1	MADD	MAP kinase activating death domain			NR3C1	nuclear receptor subfamily 3 group C member 1	PPP4R3B	protein phosphatase 4 regulatory subunit 3B	AFG1L	AFG1 like ATPase	ERICH1	glutamate rich 1	UBA52	ubiquitin A-52 residue ribosomal protein fusion product 1			FAM91A1	family with sequence similarity 91 member A1	HEMK1	HemK methyltransferase family member 1	C8orf37	chromosome 8 open reading frame 37	CAPN5	calpain 5	LYRM7	LYR motif containing 7	C4orf17	chromosome 4 open reading frame 17	KDM3B	lysine demethylase 3B	E2F3	E2F transcription factor 3	CUL4A	cullin 4A
TPO	thyroid peroxidase			UBE4B	ubiquitination factor E4B	RIC3	RIC3 acetylcholine receptor chaperone			PPP2R2C	protein phosphatase 2 regulatory subunit Bgamma	ZFAT	zinc finger and AT-hook domain containing	ZFAT	zinc finger and AT-hook domain containing	ZC3H12B	zinc finger CCCH-type containing 12B			GNAI1	G protein subunit alpha i1	HPGD	15-hydroxyprostaglandin dehydrogenase	CALML4	calmodulin like 4	ZIC3	Zic family member 3	KANSL3	KAT8 regulatory NSL complex subunit 3			UBE2W	ubiquitin conjugating enzyme E2 W	PTPRO	protein tyrosine phosphatase, receptor type O	YIPF6	Yip1 domain family member 6	ZMIZ2	zinc finger MIZ-type containing 2	PDE8A	phosphodiesterase 8A	METTL8	methyltransferase like 8	KRIT1	KRIT1, ankyrin repeat containing	AFAP1	actin filament associated protein 1	UBE4A	ubiquitination factor E4A
SETD9	SET domain containing 9			EDEM1	ER degradation enhancing alpha-mannosidase like protein 1	GPR88	G protein-coupled receptor 88			PDAP1	PDGFA associated protein 1	SOBP	sine oculis binding protein homolog	SOBP	sine oculis binding protein homolog	ZFP36L1	ZFP36 ring finger protein like 1			ZNF700	zinc finger protein 700	BEX2	brain expressed X-linked 2	CLOCK	clock circadian regulator	TBCD	tubulin folding cofactor D	SOX6	SRY-box 6			COL4A5	collagen type IV alpha 5 chain	RBL2	RB transcriptional corepressor like 2	HMCN1	hemicentin 1	BRINP2	BMP/retinoic acid inducible neural specific 2	KRTAP26-1	keratin associated protein 26-1	FAM20B	FAM20B, glycosaminoglycan xylosylkinase	SCN3B	sodium voltage-gated channel beta subunit 3	ASTN1	astrotactin 1	MINAR1	membrane integral NOTCH2 associated receptor 1
KL	klotho			ZNF444	zinc finger protein 444	RAB11A	RAB11A, member RAS oncogene family			GANC	glucosidase alpha, neutral C	THAP11	THAP domain containing 11	THAP11	THAP domain containing 11	CIDEB	cell death inducing DFFA like effector b			EPN1	epsin 1	ARSJ	arylsulfatase family member J	TBC1D24	TBC1 domain family member 24	ARMC3	armadillo repeat containing 3	PRSS57	serine protease 57			LAMP2	lysosomal associated membrane protein 2	FOXJ3	forkhead box J3	NADK2	NAD kinase 2, mitochondrial	EFNA1	ephrin A1	GTPBP10	GTP binding protein 10	COL23A1	collagen type XXIII alpha 1 chain	NEK3	NIMA related kinase 3	FBXO41	F-box protein 41	POLK	DNA polymerase kappa
TET2	tet methylcytosine dioxygenase 2			MRPS23	mitochondrial ribosomal protein S23	FBXO9	F-box protein 9			ATP6V1A	ATPase H+ transporting V1 subunit A	DMKN	dermokine	DMKN	dermokine	CYP2B6	cytochrome P450 family 2 subfamily B member 6			VASH1	vasohibin 1	CELF4	CUGBP Elav-like family member 4	C11orf87	chromosome 11 open reading frame 87	AFF1	AF4/FMR2 family member 1	WNT7B	Wnt family member 7B			ZZZ3	zinc finger ZZ-type containing 3	BTLA	B and T lymphocyte associated	MRPL19	mitochondrial ribosomal protein L19	ARRB1	arrestin beta 1	SLC4A4	solute carrier family 4 member 4	MAGEE1	MAGE family member E1	IFIT2	interferon induced protein with tetratricopeptide repeats 2	BCAM	basal cell adhesion molecule (Lutheran blood group)	C14orf39	chromosome 14 open reading frame 39
CHL1	cell adhesion molecule L1 like			CXorf40A	chromosome X open reading frame 40A	GREM1	gremlin 1, DAN family BMP antagonist			TRIM59	tripartite motif containing 59	ACP7	acid phosphatase 7, tartrate resistant (putative)	ACP7	acid phosphatase 7, tartrate resistant (putative)	SLAMF7	SLAM family member 7			ELAVL4	ELAV like RNA binding protein 4	HSD17B12	hydroxysteroid 17-beta dehydrogenase 12	NEUROD6	neuronal differentiation 6	PLIN5	perilipin 5	ARL2BP	ADP ribosylation factor like GTPase 2 binding protein			RAD23B	RAD23 homolog B, nucleotide excision repair protein	GMNC	geminin coiled-coil domain containing	ACBD3	acyl-CoA binding domain containing 3	KANSL3	KAT8 regulatory NSL complex subunit 3	RHBDD1	rhomboid domain containing 1	LUZP2	leucine zipper protein 2	RPGRIP1L	RPGRIP1 like	C5AR1	complement C5a receptor 1	AFTPH	aftiphilin
DCAF4L1	DDB1 and CUL4 associated factor 4 like 1			APLNR	apelin receptor	KMT5B	lysine methyltransferase 5B			LSM14A	LSM14A, mRNA processing body assembly factor	SYT13	synaptotagmin 13	SYT13	synaptotagmin 13	GLG1	golgi glycoprotein 1			SH3YL1	SH3 and SYLF domain containing 1	ZNF621	zinc finger protein 621	GDF9	growth differentiation factor 9	MMGT1	membrane magnesium transporter 1	CBL	Cbl proto-oncogene			IMPACT	impact RWD domain protein	SRSF11	serine and arginine rich splicing factor 11	DNAJC21	DnaJ heat shock protein family (Hsp40) member C21	SOX6	SRY-box 6	DCUN1D5	defective in cullin neddylation 1 domain containing 5	SELENOV	selenoprotein V	PGAP1	post-GPI attachment to proteins 1	PCGF3	polycomb group ring finger 3	MYCN	MYCN proto-oncogene, bHLH transcription factor
CDC23	cell division cycle 23			THEG	theg spermatid protein	LUC7L3	LUC7 like 3 pre-mRNA splicing factor			LTB4R	leukotriene B4 receptor	KMT2C	lysine methyltransferase 2C	KMT2C	lysine methyltransferase 2C	ARID2	AT-rich interaction domain 2			SNRPB2	small nuclear ribonucleoprotein polypeptide B2	RPRD1B	regulation of nuclear pre-mRNA domain containing 1B	KCNJ10	potassium voltage-gated channel subfamily J member 10	TFDP1	transcription factor Dp-1	FAM162B	family with sequence similarity 162 member B			ITGA6	integrin subunit alpha 6	LONRF2	LON peptidase N-terminal domain and ring finger 2	MEF2D	myocyte enhancer factor 2D	PRSS57	serine protease 57	CLCN5	chloride voltage-gated channel 5	MARVELD3	MARVEL domain containing 3	MED29	mediator complex subunit 29	FN3KRP	fructosamine 3 kinase related protein	MTHFS	methenyltetrahydrofolate synthetase
STK26	serine/threonine kinase 26			PXMP4	peroxisomal membrane protein 4	PLGLB1	plasminogen-like B1			PLEKHA8	pleckstrin homology domain containing A8	G6PD	glucose-6-phosphate dehydrogenase	G6PD	glucose-6-phosphate dehydrogenase	UBE2D2	ubiquitin conjugating enzyme E2 D2			PAXBP1	PAX3 and PAX7 binding protein 1	C12orf29	chromosome 12 open reading frame 29	YIPF6	Yip1 domain family member 6	ZNF12	zinc finger protein 12	SEZ6	seizure related 6 homolog			MORC1	MORC family CW-type zinc finger 1	LYSMD1	LysM domain containing 1	SLC25A31	solute carrier family 25 member 31	WNT7B	Wnt family member 7B	ACSL6	acyl-CoA synthetase long chain family member 6	FOXO1	forkhead box O1	CYBRD1	cytochrome b reductase 1	VPS26B	VPS26, retromer complex component B	ST20-MTHFS	ST20-MTHFS readthrough
EXPH5	exophilin 5			CSMD3	CUB and Sushi multiple domains 3	PLGLB2	plasminogen-like B2			CDK12	cyclin dependent kinase 12	C6orf47	chromosome 6 open reading frame 47	C6orf47	chromosome 6 open reading frame 47	IFI44L	interferon induced protein 44 like			EMX2	empty spiracles homeobox 2	GDI2	GDP dissociation inhibitor 2	TNPO1	transportin 1	CNBP	CCHC-type zinc finger nucleic acid binding protein	GJB3	gap junction protein beta 3			VEGFA	vascular endothelial growth factor A	GCGR	glucagon receptor	TMED7	transmembrane p24 trafficking protein 7	ARL2BP	ADP ribosylation factor like GTPase 2 binding protein	NDFIP1	Nedd4 family interacting protein 1	PROSER1	proline and serine rich 1	ISL1	ISL LIM homeobox 1	ANGPT4	angiopoietin 4	MSI2	musashi RNA binding protein 2
RHOJ	ras homolog family member J			ZNF90	zinc finger protein 90	ZNF680	zinc finger protein 680			DENND6A	DENN domain containing 6A	NKAPD1	NKAP domain containing 1	NKAPD1	NKAP domain containing 1	DENND2A	DENN domain containing 2A			CEACAM6	carcinoembryonic antigen related cell adhesion molecule 6	ZBTB38	zinc finger and BTB domain containing 38	CTSC	cathepsin C	IL6ST	interleukin 6 signal transducer	LAMB4	laminin subunit beta 4			UNC5D	unc-5 netrin receptor D	PFKP	phosphofructokinase, platelet	CPLANE1	ciliogenesis and planar polarity effector 1	RAB3D	RAB3D, member RAS oncogene family	PSG1	pregnancy specific beta-1-glycoprotein 1	SNTG1	syntrophin gamma 1	ZC3H12B	zinc finger CCCH-type containing 12B	APEX2	apurinic/apyrimidinic endodeoxyribonuclease 2	USP3	ubiquitin specific peptidase 3
CSF2	colony stimulating factor 2			SPRY4	sprouty RTK signaling antagonist 4	PNPLA4	patatin like phospholipase domain containing 4			NFIX	nuclear factor I X	CDK6	cyclin dependent kinase 6	CDK6	cyclin dependent kinase 6	TBC1D5	TBC1 domain family member 5			ANKRD17	ankyrin repeat domain 17	SEL1L	SEL1L, ERAD E3 ligase adaptor subunit	YES1	YES proto-oncogene 1, Src family tyrosine kinase	CHTF8	chromosome transmission fidelity factor 8	FAM83B	family with sequence similarity 83 member B			SPP1	secreted phosphoprotein 1	RAP1GDS1	Rap1 GTPase-GDP dissociation stimulator 1	WAPL	WAPL cohesin release factor	CBL	Cbl proto-oncogene	PPM1L	protein phosphatase, Mg2+/Mn2+ dependent 1L	TMEM67	transmembrane protein 67	ZC3H12D	zinc finger CCCH-type containing 12D	HNRNPR	heterogeneous nuclear ribonucleoprotein R	UBE2K	ubiquitin conjugating enzyme E2 K
ZNF595	zinc finger protein 595			ERBB4	erb-b2 receptor tyrosine kinase 4	ZNF250	zinc finger protein 250			UFSP2	UFM1 specific peptidase 2	VPS26A	VPS26, retromer complex component A	VPS26A	VPS26, retromer complex component A	PRDM11	PR/SET domain 11			NAA11	N(alpha)-acetyltransferase 11, NatA catalytic subunit	DIPK2A	divergent protein kinase domain 2A	ATRN	attractin	NIPAL1	NIPA like domain containing 1	ARSA	arylsulfatase A			VEZF1	vascular endothelial zinc finger 1	SLC22A14	solute carrier family 22 member 14	DTD2	D-tyrosyl-tRNA deacylase 2 (putative)	FAM162B	family with sequence similarity 162 member B	NT5DC1	5'-nucleotidase domain containing 1	DNAAF2	dynein axonemal assembly factor 2	TFPI	tissue factor pathway inhibitor	CCDC149	coiled-coil domain containing 149	KMT2C	lysine methyltransferase 2C
MSI2	musashi RNA binding protein 2			NDRG1	N-myc downstream regulated 1	EDEM3	ER degradation enhancing alpha-mannosidase like protein 3			GABRA6	gamma-aminobutyric acid type A receptor alpha6 subunit	VEZF1	vascular endothelial zinc finger 1	VEZF1	vascular endothelial zinc finger 1	CDR2L	cerebellar degeneration related protein 2 like			SLC25A27	solute carrier family 25 member 27	GXYLT1	glucoside xylosyltransferase 1	RERG	RAS like estrogen regulated growth inhibitor	TCP1	t-complex 1	MYO10	myosin X			BTN1A1	butyrophilin subfamily 1 member A1	CCDC120	coiled-coil domain containing 120	FAM91A1	family with sequence similarity 91 member A1	SEZ6	seizure related 6 homolog	CAPN6	calpain 6	LUC7L2	LUC7 like 2, pre-mRNA splicing factor	POLH	DNA polymerase eta	ANKRD45	ankyrin repeat domain 45	RBM3	RNA binding motif protein 3
ATP2A2	ATPase sarcoplasmic/endoplasmic reticulum Ca2+ transporting 2			PTCD3	pentatricopeptide repeat domain 3	TOMM20	translocase of outer mitochondrial membrane 20			DDX3X	DEAD-box helicase 3 X-linked	AHCYL2	adenosylhomocysteinase like 2	AHCYL2	adenosylhomocysteinase like 2	LDLRAD1	low density lipoprotein receptor class A domain containing 1			ZNF695	zinc finger protein 695	IAPP	islet amyloid polypeptide	CEP44	centrosomal protein 44	ZNF391	zinc finger protein 391	PQLC1	PQ loop repeat containing 1			ZNF544	zinc finger protein 544	PNMA2	PNMA family member 2	ZNF106	zinc finger protein 106	GJB3	gap junction protein beta 3	ATRNL1	attractin like 1	ZNF430	zinc finger protein 430	ERCC4	ERCC excision repair 4, endonuclease catalytic subunit	PHB	prohibitin	THBS2	thrombospondin 2
POU2F1	POU class 2 homeobox 1			LSM12	LSM12 homolog	AQP11	aquaporin 11			ERI1	exoribonuclease 1	ACVR2B	activin A receptor type 2B	ACVR2B	activin A receptor type 2B	GML	glycosylphosphatidylinositol anchored molecule like			IFNA14	interferon alpha 14	TTC33	tetratricopeptide repeat domain 33	NHS	NHS actin remodeling regulator	SETDB2	SET domain bifurcated histone lysine methyltransferase 2	SLC25A53	solute carrier family 25 member 53			ARID2	AT-rich interaction domain 2	SRRM4	serine/arginine repetitive matrix 4	GRIP2	glutamate receptor interacting protein 2	FAM83B	family with sequence similarity 83 member B	SLCO6A1	solute carrier organic anion transporter family member 6A1	CPM	carboxypeptidase M	PCDH7	protocadherin 7	RNF157	ring finger protein 157	MED4	mediator complex subunit 4
XPNPEP3	X-prolyl aminopeptidase 3			ADCY1	adenylate cyclase 1	DDX6	DEAD-box helicase 6			IL1RAP	interleukin 1 receptor accessory protein	HIF1AN	hypoxia inducible factor 1 subunit alpha inhibitor	HIF1AN	hypoxia inducible factor 1 subunit alpha inhibitor	CFLAR	CASP8 and FADD like apoptosis regulator			NINL	ninein like	ZDHHC9	zinc finger DHHC-type containing 9	MET	MET proto-oncogene, receptor tyrosine kinase	SHF	Src homology 2 domain containing F	CAV2	caveolin 2			PPM1K	protein phosphatase, Mg2+/Mn2+ dependent 1K	IQSEC1	IQ motif and Sec7 domain 1	ROBO1	roundabout guidance receptor 1	KCNAB2	potassium voltage-gated channel subfamily A regulatory beta subunit 2	SPATA18	spermatogenesis associated 18	MECP2	methyl-CpG binding protein 2	OR2A4	olfactory receptor family 2 subfamily A member 4	SLC7A1	solute carrier family 7 member 1	CHD9	chromodomain helicase DNA binding protein 9
KRTAP24-1	keratin associated protein 24-1			ELL2	elongation factor for RNA polymerase II 2	CEP70	centrosomal protein 70			MIER3	MIER family member 3	ADAL	adenosine deaminase like	ADAL	adenosine deaminase like	CENPN	centromere protein N			THAP2	THAP domain containing 2	RAB27B	RAB27B, member RAS oncogene family	PPP1R7	protein phosphatase 1 regulatory subunit 7	MBOAT2	membrane bound O-acyltransferase domain containing 2	CEP164	centrosomal protein 164			FAM104A	family with sequence similarity 104 member A	TULP4	tubby like protein 4	ETF1	eukaryotic translation termination factor 1	LAMB4	laminin subunit beta 4	PSG8	pregnancy specific beta-1-glycoprotein 8	FAM227A	family with sequence similarity 227 member A	TOGARAM1	TOG array regulator of axonemal microtubules 1	TRAF3IP1	TRAF3 interacting protein 1	PPP4R2	protein phosphatase 4 regulatory subunit 2
TMEM127	transmembrane protein 127			PPIP5K1	diphosphoinositol pentakisphosphate kinase 1	ABL1	ABL proto-oncogene 1, non-receptor tyrosine kinase			ELAVL1	ELAV like RNA binding protein 1	FAM83D	family with sequence similarity 83 member D	FAM83D	family with sequence similarity 83 member D	PPARGC1A	PPARG coactivator 1 alpha			LRIT1	leucine rich repeat, Ig-like and transmembrane domains 1	BTBD10	BTB domain containing 10	DSP	desmoplakin	IGF2	insulin like growth factor 2	SSH3	slingshot protein phosphatase 3			PHF6	PHD finger protein 6	SATL1	spermidine/spermine N1-acetyl transferase like 1	ACTR8	ARP8 actin related protein 8 homolog	ARSA	arylsulfatase A	NAV3	neuron navigator 3	HDAC9	histone deacetylase 9	PDGFD	platelet derived growth factor D	C9orf57	chromosome 9 open reading frame 57	LOXL1	lysyl oxidase like 1
PITPNA	phosphatidylinositol transfer protein alpha			TMCO1	transmembrane and coiled-coil domains 1	KDELC2	KDEL motif containing 2			ATF7	activating transcription factor 7	BCL11A	BCL11A, BAF complex component	BCL11A	BCL11A, BAF complex component	CHP1	calcineurin like EF-hand protein 1			WAC	WW domain containing adaptor with coiled-coil	GPR12	G protein-coupled receptor 12	USP31	ubiquitin specific peptidase 31	TBC1D8	TBC1 domain family member 8	MLLT3	MLLT3, super elongation complex subunit			GSE1	Gse1 coiled-coil protein	REPS2	RALBP1 associated Eps domain containing 2	HBS1L	HBS1 like translational GTPase	MYO10	myosin X	EBF2	EBF transcription factor 2	ARIH1	ariadne RBR E3 ubiquitin protein ligase 1	APOOL	apolipoprotein O like	TSC22D2	TSC22 domain family member 2	STMN1	stathmin 1
ARMC8	armadillo repeat containing 8			MXD1	MAX dimerization protein 1	GPR85	G protein-coupled receptor 85			HK1	hexokinase 1	CNOT9	CCR4-NOT transcription complex subunit 9	CNOT9	CCR4-NOT transcription complex subunit 9	ATXN1	ataxin 1			CASK	calcium/calmodulin dependent serine protein kinase	ZBTB33	zinc finger and BTB domain containing 33	HTR5A	5-hydroxytryptamine receptor 5A	ACADM	acyl-CoA dehydrogenase medium chain	YWHAB	tyrosine 3-monooxygenase/tryptophan 5-monooxygenase activation protein beta			AADAT	aminoadipate aminotransferase	NPR3	natriuretic peptide receptor 3	PRELID3B	PRELI domain containing 3B	PQLC1	PQ loop repeat containing 1	PSG4	pregnancy specific beta-1-glycoprotein 4	CSKMT	citrate synthase lysine methyltransferase	NIN	ninein	TAP2	transporter 2, ATP binding cassette subfamily B member	PAQR5	progestin and adipoQ receptor family member 5
ABCB11	ATP binding cassette subfamily B member 11			ZC3HAV1	zinc finger CCCH-type containing, antiviral 1	INSM1	INSM transcriptional repressor 1			PDE8B	phosphodiesterase 8B	PRPF40A	pre-mRNA processing factor 40 homolog A	PRPF40A	pre-mRNA processing factor 40 homolog A	DNAJB5	DnaJ heat shock protein family (Hsp40) member B5			ATXN1	ataxin 1	POLR3F	RNA polymerase III subunit F	SLC6A15	solute carrier family 6 member 15	RESF1	retroelement silencing factor 1	NELFE	negative elongation factor complex member E			UFM1	ubiquitin fold modifier 1	PTAR1	protein prenyltransferase alpha subunit repeat containing 1	ZNF264	zinc finger protein 264	SSR1	signal sequence receptor subunit 1	PEX5	peroxisomal biogenesis factor 5	ZDHHC17	zinc finger DHHC-type containing 17	CFL2	cofilin 2	ARHGAP19	Rho GTPase activating protein 19	SLC25A3	solute carrier family 25 member 3
IGF2BP3	insulin like growth factor 2 mRNA binding protein 3			SLC7A2	solute carrier family 7 member 2	KAT2B	lysine acetyltransferase 2B			AKAP11	A-kinase anchoring protein 11	UHRF1BP1	UHRF1 binding protein 1	UHRF1BP1	UHRF1 binding protein 1	NAPEPLD	N-acyl phosphatidylethanolamine phospholipase D			PSMA7	proteasome subunit alpha 7	STXBP5	syntaxin binding protein 5	GRAMD2B	GRAM domain containing 2B	GYPA	glycophorin A (MNS blood group)	C17orf102	chromosome 17 open reading frame 102			PCDH9	protocadherin 9	LIN7A	lin-7 homolog A, crumbs cell polarity complex component	RNLS	renalase, FAD dependent amine oxidase	SLC25A53	solute carrier family 25 member 53	GVQW3	GVQW motif containing 3	NUFIP2	nuclear FMR1 interacting protein 2	NRF1	nuclear respiratory factor 1	MASP1	mannan binding lectin serine peptidase 1	ZNF629	zinc finger protein 629
PHLDB2	pleckstrin homology like domain family B member 2			LARP4B	La ribonucleoprotein domain family member 4B	ANKRD22	ankyrin repeat domain 22			LYPLA1	lysophospholipase 1	CREB1	cAMP responsive element binding protein 1	CREB1	cAMP responsive element binding protein 1	FKBP14	FKBP prolyl isomerase 14			COPA	coatomer protein complex subunit alpha	STX2	syntaxin 2	RNF8	ring finger protein 8	STON1	stonin 1	SLC12A7	solute carrier family 12 member 7			WSCD1	WSC domain containing 1	PDS5A	PDS5 cohesin associated factor A	CD1D	CD1d molecule	CAV2	caveolin 2	CHML	CHM like, Rab escort protein 2	YTHDC2	YTH domain containing 2	DENND1B	DENN domain containing 1B	WIPF2	WAS/WASL interacting protein family member 2	ZC3H7A	zinc finger CCCH-type containing 7A
KCNJ2	potassium voltage-gated channel subfamily J member 2			CXXC4	CXXC finger protein 4	BCL10	BCL10, immune signaling adaptor			SAXO1	stabilizer of axonemal microtubules 1	PACSIN2	protein kinase C and casein kinase substrate in neurons 2	PACSIN2	protein kinase C and casein kinase substrate in neurons 2	DDA1	DET1 and DDB1 associated 1			KIAA1549	KIAA1549	ACSL3	acyl-CoA synthetase long chain family member 3	EFEMP2	EGF containing fibulin extracellular matrix protein 2	ZMAT1	zinc finger matrin-type 1	SSR1	signal sequence receptor subunit 1			PUS7L	pseudouridine synthase 7 like	RIPOR2	RHO family interacting cell polarization regulator 2	CBLN4	cerebellin 4 precursor	CEP164	centrosomal protein 164	HMOX1	heme oxygenase 1	FAM71F2	family with sequence similarity 71 member F2	RER1	retention in endoplasmic reticulum sorting receptor 1	BDH2	3-hydroxybutyrate dehydrogenase 2	ZSCAN30	zinc finger and SCAN domain containing 30
HLF	HLF, PAR bZIP transcription factor			POC1B	POC1 centriolar protein B	HLF	HLF, PAR bZIP transcription factor			KANK1	KN motif and ankyrin repeat domains 1	FAM210B	family with sequence similarity 210 member B	FAM210B	family with sequence similarity 210 member B	CALCR	calcitonin receptor			PKP1	plakophilin 1	RNF11	ring finger protein 11	EPHB2	EPH receptor B2	ZFX	zinc finger protein X-linked	SLC1A2	solute carrier family 1 member 2			KCNMB2	potassium calcium-activated channel subfamily M regulatory beta subunit 2	XPR1	xenotropic and polytropic retrovirus receptor 1	FNDC3B	fibronectin type III domain containing 3B	SSH3	slingshot protein phosphatase 3	DNAJC12	DnaJ heat shock protein family (Hsp40) member C12	KPNA1	karyopherin subunit alpha 1	DMTF1	cyclin D binding myb like transcription factor 1	PSMD11	proteasome 26S subunit, non-ATPase 11	TMEM30A	transmembrane protein 30A
CLTC	clathrin heavy chain			BCL11B	BCL11B, BAF complex component	CACNA1E	calcium voltage-gated channel subunit alpha1 E			KCNMA1	potassium calcium-activated channel subfamily M alpha 1	H3F3B	H3 histone family member 3B	H3F3B	H3 histone family member 3B	AHR	aryl hydrocarbon receptor			ZNF763	zinc finger protein 763	DNA2	DNA replication helicase/nuclease 2	JAG1	jagged 1	SUSD5	sushi domain containing 5	KIF6	kinesin family member 6			TTPA	alpha tocopherol transfer protein	PRR29	proline rich 29	DNER	delta/notch like EGF repeat containing	MLLT3	MLLT3, super elongation complex subunit	AKAP12	A-kinase anchoring protein 12	GJC1	gap junction protein gamma 1	ATMIN	ATM interactor	CAMKV	CaM kinase like vesicle associated	SCD5	stearoyl-CoA desaturase 5
SMAD3	SMAD family member 3			PET117	PET117 homolog	NSL1	NSL1, MIS12 kinetochore complex component			ARHGAP5	Rho GTPase activating protein 5	SCRN1	secernin 1	SCRN1	secernin 1	CEBPZOS	CEBPZ opposite strand			ZNF347	zinc finger protein 347	ERG	ETS transcription factor ERG	ADAMTS5	ADAM metallopeptidase with thrombospondin type 1 motif 5	TSPAN8	tetraspanin 8	KCNAB2	potassium voltage-gated channel subfamily A regulatory beta subunit 2			CCDC122	coiled-coil domain containing 122	TFPI	tissue factor pathway inhibitor	PDS5B	PDS5 cohesin associated factor B	YWHAB	tyrosine 3-monooxygenase/tryptophan 5-monooxygenase activation protein beta	CHURC1	churchill domain containing 1	CARF	calcium responsive transcription factor	BMS1	BMS1, ribosome biogenesis factor	CSTF2T	cleavage stimulation factor subunit 2 tau variant	CPM	carboxypeptidase M
DHFR2	dihydrofolate reductase 2			DCTN2	dynactin subunit 2	HDAC2	histone deacetylase 2			TTC31	tetratricopeptide repeat domain 31	NRM	nurim	NRM	nurim	STAT3	signal transducer and activator of transcription 3			SPATA5L1	spermatogenesis associated 5 like 1	TCEANC2	transcription elongation factor A N-terminal and central domain containing 2	FOXN2	forkhead box N2	CHKA	choline kinase alpha	RAB3D	RAB3D, member RAS oncogene family			PPIL4	peptidylprolyl isomerase like 4	HAO1	hydroxyacid oxidase 1	TMEM248	transmembrane protein 248	NELFE	negative elongation factor complex member E	RETREG3	reticulophagy regulator family member 3	SMIM14	small integral membrane protein 14	MSL2	MSL complex subunit 2	GAPT	GRB2 binding adaptor protein, transmembrane	ZNF333	zinc finger protein 333
STK32A	serine/threonine kinase 32A			PLPP6	phospholipid phosphatase 6	PCLO	piccolo presynaptic cytomatrix protein			FGFR4	fibroblast growth factor receptor 4	ARPIN	actin related protein 2/3 complex inhibitor	ARPIN	actin related protein 2/3 complex inhibitor	SYNPO2	synaptopodin 2			PIN4	peptidylprolyl cis/trans isomerase, NIMA-interacting 4	ACTR1A	ARP1 actin related protein 1 homolog A	DCX	doublecortin	HNRNPF	heterogeneous nuclear ribonucleoprotein F	TTBK1	tau tubulin kinase 1			BZW1	basic leucine zipper and W2 domains 1	C21orf62	chromosome 21 open reading frame 62	RBFOX2	RNA binding fox-1 homolog 2	C17orf102	chromosome 17 open reading frame 102	DGKI	diacylglycerol kinase iota	HNRNPC	heterogeneous nuclear ribonucleoprotein C (C1/C2)	CDH6	cadherin 6	NR4A3	nuclear receptor subfamily 4 group A member 3	SPTLC2	serine palmitoyltransferase long chain base subunit 2
TP53INP1	tumor protein p53 inducible nuclear protein 1			RPUSD4	RNA pseudouridine synthase D4	RPIA	ribose 5-phosphate isomerase A			TRIM5	tripartite motif containing 5	DCUN1D4	defective in cullin neddylation 1 domain containing 4	DCUN1D4	defective in cullin neddylation 1 domain containing 4	PIK3IP1	phosphoinositide-3-kinase interacting protein 1			ZNF780A	zinc finger protein 780A	METTL4	methyltransferase like 4	DSG3	desmoglein 3	DCUN1D1	defective in cullin neddylation 1 domain containing 1	ABHD2	abhydrolase domain containing 2			PPME1	protein phosphatase methylesterase 1	SPRN	shadow of prion protein	MTUS2	microtubule associated scaffold protein 2	SLC12A7	solute carrier family 12 member 7	GOLGA2	golgin A2	MIOS	meiosis regulator for oocyte development	ZNF24	zinc finger protein 24	RPA1	replication protein A1	ARF6	ADP ribosylation factor 6
ADAM10	ADAM metallopeptidase domain 10			BEAN1	brain expressed associated with NEDD4 1	SYNPO2	synaptopodin 2			TCEAL3	transcription elongation factor A like 3	VSTM4	V-set and transmembrane domain containing 4	VSTM4	V-set and transmembrane domain containing 4	ACTR5	ARP5 actin related protein 5 homolog			CALCOCO1	calcium binding and coiled-coil domain 1	SNX2	sorting nexin 2	TET3	tet methylcytosine dioxygenase 3	YPEL2	yippee like 2	KRT7	keratin 7			LRRCC1	leucine rich repeat and coiled-coil centrosomal protein 1	NDEL1	nudE neurodevelopment protein 1 like 1	BTG3	BTG anti-proliferation factor 3	ARHGAP35	Rho GTPase activating protein 35	SF3B1	splicing factor 3b subunit 1	MAGEE2	MAGE family member E2	NT5DC1	5'-nucleotidase domain containing 1	MAN2A1	mannosidase alpha class 2A member 1	TBC1D26	TBC1 domain family member 26
SCARA3	scavenger receptor class A member 3			ADCYAP1R1	ADCYAP receptor type I	ZNF273	zinc finger protein 273			TENT4B	terminal nucleotidyltransferase 4B	CLOCK	clock circadian regulator	CLOCK	clock circadian regulator	L2HGDH	L-2-hydroxyglutarate dehydrogenase			TEX2	testis expressed 2	GFM2	G elongation factor mitochondrial 2	LRRC74B	leucine rich repeat containing 74B	RORA	RAR related orphan receptor A	NMNAT2	nicotinamide nucleotide adenylyltransferase 2			C5orf24	chromosome 5 open reading frame 24	PPP3R1	protein phosphatase 3 regulatory subunit B, alpha	CAST	calpastatin	KIF6	kinesin family member 6	CD28	CD28 molecule	TRIM33	tripartite motif containing 33	VPS26A	VPS26, retromer complex component A	ACVR2B	activin A receptor type 2B	ALKBH3	alkB homolog 3, alpha-ketoglutaratedependent dioxygenase
ZNF829	zinc finger protein 829			RIPK1	receptor interacting serine/threonine kinase 1	BNC2	basonuclin 2			ATG7	autophagy related 7	RNF38	ring finger protein 38	RNF38	ring finger protein 38	DNAJC27	DnaJ heat shock protein family (Hsp40) member C27			SEMA3E	semaphorin 3E	ALCAM	activated leukocyte cell adhesion molecule	TNFRSF11A	TNF receptor superfamily member 11a	ATP1B1	ATPase Na+/K+ transporting subunit beta 1	CPNE6	copine 6			ADAM28	ADAM metallopeptidase domain 28	HS3ST2	heparan sulfate-glucosamine 3-sulfotransferase 2	USP46	ubiquitin specific peptidase 46	TNFSF9	TNF superfamily member 9	ARIH1	ariadne RBR E3 ubiquitin protein ligase 1	MS4A2	membrane spanning 4-domains A2	CCDC170	coiled-coil domain containing 170	RAB11FIP2	RAB11 family interacting protein 2	SRCIN1	SRC kinase signaling inhibitor 1
KLF5	Kruppel like factor 5			TNPO2	transportin 2	RPL7L1	ribosomal protein L7 like 1			TSHZ3	teashirt zinc finger homeobox 3	CD34	CD34 molecule	CD34	CD34 molecule	SLC26A9	solute carrier family 26 member 9			GPC4	glypican 4	TMCC1	transmembrane and coiled-coil domain family 1	PGBD2	piggyBac transposable element derived 2	UHRF1	ubiquitin like with PHD and ring finger domains 1	SNPH	syntaphilin			AGMO	alkylglycerol monooxygenase	SALL2	spalt like transcription factor 2	CYP3A5	cytochrome P450 family 3 subfamily A member 5	DDA1	DET1 and DDB1 associated 1	ATF7IP	activating transcription factor 7 interacting protein	RAB14	RAB14, member RAS oncogene family	BOLL	boule homolog, RNA binding protein	ZNF585B	zinc finger protein 585B	TOR4A	torsin family 4 member A
TPP2	tripeptidyl peptidase 2			P4HA1	prolyl 4-hydroxylase subunit alpha 1	OTUD4	OTU deubiquitinase 4			UVRAG	UV radiation resistance associated	HECTD2	HECT domain E3 ubiquitin protein ligase 2	HECTD2	HECT domain E3 ubiquitin protein ligase 2	HMGA2	high mobility group AT-hook 2			YWHAQ	tyrosine 3-monooxygenase/tryptophan 5-monooxygenase activation protein theta	PAX6	paired box 6	DENND1B	DENN domain containing 1B	LGR4	leucine rich repeat containing G protein-coupled receptor 4	C10orf126	chromosome 10 open reading frame 126			MEF2C	myocyte enhancer factor 2C	FAM163A	family with sequence similarity 163 member A	PNRC2	proline rich nuclear receptor coactivator 2	EGF	epidermal growth factor	DSC3	desmocollin 3	PSMB2	proteasome subunit beta 2	RPL37	ribosomal protein L37	ZC4H2	zinc finger C4H2-type containing	ZNF850	zinc finger protein 850
GLUL	glutamate-ammonia ligase			CABYR	calcium binding tyrosine phosphorylation regulated	ITGA4	integrin subunit alpha 4			TBC1D4	TBC1 domain family member 4	ZER1	zyg-11 related cell cycle regulator	ZER1	zyg-11 related cell cycle regulator	SLC6A8	solute carrier family 6 member 8			SNX10	sorting nexin 10	BTG3	BTG anti-proliferation factor 3	CLK4	CDC like kinase 4	NFIB	nuclear factor I B	ARHGAP35	Rho GTPase activating protein 35			MCUB	mitochondrial calcium uniporter dominant negative beta subunit	RNF38	ring finger protein 38	MCMBP	minichromosome maintenance complex binding protein	CGNL1	cingulin like 1	FOXE1	forkhead box E1	SGK1	serum/glucocorticoid regulated kinase 1	MGAT4A	alpha-1,3-mannosyl-glycoprotein 4-beta-N-acetylglucosaminyltransferase A	P2RY10	P2Y receptor family member 10	ASB15	ankyrin repeat and SOCS box containing 15
IRF4	interferon regulatory factor 4			IL33	interleukin 33	LRRFIP1	LRR binding FLII interacting protein 1			AHDC1	AT-hook DNA binding motif containing 1	TRAM1	translocation associated membrane protein 1	TRAM1	translocation associated membrane protein 1	NQO1	NAD(P)H quinone dehydrogenase 1			PLEKHA5	pleckstrin homology domain containing A5	SYT14	synaptotagmin 14	KIF16B	kinesin family member 16B	ANGPTL7	angiopoietin like 7	FHIT	fragile histidine triad			GPATCH2	G-patch domain containing 2	PPIL1	peptidylprolyl isomerase like 1	LNPEP	leucyl and cystinyl aminopeptidase	FHIT	fragile histidine triad	TRIM67	tripartite motif containing 67	LRRTM3	leucine rich repeat transmembrane neuronal 3	KIAA1143	KIAA1143	TAOK1	TAO kinase 1	PAQR9	progestin and adipoQ receptor family member 9
RASGRP1	RAS guanyl releasing protein 1			PHC3	polyhomeotic homolog 3	YES1	YES proto-oncogene 1, Src family tyrosine kinase			CALHM1	calcium homeostasis modulator 1	JMJD8	jumonji domain containing 8	JMJD8	jumonji domain containing 8	SLC2A11	solute carrier family 2 member 11			SRI	sorcin	HIF1A	hypoxia inducible factor 1 subunit alpha	MT1X	metallothionein 1X	C16orf72	chromosome 16 open reading frame 72	CGNL1	cingulin like 1			ATP8A2	ATPase phospholipid transporting 8A2	SEC61A2	Sec61 translocon alpha 2 subunit	STARD9	StAR related lipid transfer domain containing 9	KRT7	keratin 7	ATP13A3	ATPase 13A3	TBPL1	TATA-box binding protein like 1	MFSD4A	major facilitator superfamily domain containing 4A	LUC7L2	LUC7 like 2, pre-mRNA splicing factor	ANKS1A	ankyrin repeat and sterile alpha motif domain containing 1A
ZNF626	zinc finger protein 626			ZNF500	zinc finger protein 500	MYT1L	myelin transcription factor 1 like			TOX	thymocyte selection associated high mobility group box	IGLON5	IgLON family member 5	IGLON5	IgLON family member 5	BRWD1	bromodomain and WD repeat domain containing 1			VAPB	VAMP associated protein B and C	ABCC9	ATP binding cassette subfamily C member 9	CCDC47	coiled-coil domain containing 47	CELF2	CUGBP Elav-like family member 2	ZNF346	zinc finger protein 346			ZNF626	zinc finger protein 626	TXNL4B	thioredoxin like 4B	PTEN	phosphatase and tensin homolog	NMNAT2	nicotinamide nucleotide adenylyltransferase 2	DOP1B	DOP1 leucine zipper like protein B	CD84	CD84 molecule	RASAL2	RAS protein activator like 2	ABHD2	abhydrolase domain containing 2	CAV1	caveolin 1
RPL27A	ribosomal protein L27a			ATG12	autophagy related 12	TTC39C	tetratricopeptide repeat domain 39C			C10orf99	chromosome 10 open reading frame 99	KIF26A	kinesin family member 26A	KIF26A	kinesin family member 26A	CHMP4B	charged multivesicular body protein 4B			ITGAL	integrin subunit alpha L	HDAC2	histone deacetylase 2	KCNJ5	potassium voltage-gated channel subfamily J member 5	COG2	component of oligomeric golgi complex 2	RAB6B	RAB6B, member RAS oncogene family			EPHA5	EPH receptor A5	CADM2	cell adhesion molecule 2	AHCTF1	AT-hook containing transcription factor 1	CPNE6	copine 6	PYGO1	pygopus family PHD finger 1	CXorf38	chromosome X open reading frame 38	RAB3IP	RAB3A interacting protein	SCAF11	SR-related CTD associated factor 11	SOX6	SRY-box 6
RNF111	ring finger protein 111			COL25A1	collagen type XXV alpha 1 chain	ZNF423	zinc finger protein 423			EPHA8	EPH receptor A8	C12orf65	chromosome 12 open reading frame 65	C12orf65	chromosome 12 open reading frame 65	UBASH3B	ubiquitin associated and SH3 domain containing B			CRKL	CRK like proto-oncogene, adaptor protein	HDGFL3	HDGF like 3	MYO1F	myosin IF	PCDHGA7	protocadherin gamma subfamily A, 7	EPOP	elongin BC and polycomb repressive complex 2 associated protein			UBE2G2	ubiquitin conjugating enzyme E2 G2	KLHL11	kelch like family member 11	ZNF486	zinc finger protein 486	C10orf126	chromosome 10 open reading frame 126	ZNF197	zinc finger protein 197	EXOC5	exocyst complex component 5	ZNF516	zinc finger protein 516	PRLR	prolactin receptor	RUNX1	runt related transcription factor 1
NEBL	nebulette			ADAR	adenosine deaminase, RNA specific	GRIA3	glutamate ionotropic receptor AMPA type subunit 3			YIPF5	Yip1 domain family member 5	MZF1	myeloid zinc finger 1	MZF1	myeloid zinc finger 1	PLEKHA5	pleckstrin homology domain containing A5			KCNT1	potassium sodium-activated channel subfamily T member 1	DHX15	DEAH-box helicase 15	LRRFIP1	LRR binding FLII interacting protein 1	HACD4	3-hydroxyacyl-CoA dehydratase 4	TNFSF9	TNF superfamily member 9			RANBP2	RAN binding protein 2	CLBA1	clathrin binding box of aftiphilin containing 1	B3GALNT1	beta-1,3-N-acetylgalactosaminyltransferase 1 (globoside blood group)	NRIP3	nuclear receptor interacting protein 3	FMO2	flavin containing monooxygenase 2	ZNF696	zinc finger protein 696	ANGPT1	angiopoietin 1	SOCS4	suppressor of cytokine signaling 4	LCOR	ligand dependent nuclear receptor corepressor
IDE	insulin degrading enzyme			GTPBP6	GTP binding protein 6 (putative)	PHIP	pleckstrin homology domain interacting protein			TMEM218	transmembrane protein 218	CHD6	chromodomain helicase DNA binding protein 6	CHD6	chromodomain helicase DNA binding protein 6	LIN9	lin-9 DREAM MuvB core complex component			ST8SIA5	ST8 alpha-N-acetyl-neuraminide alpha-2,8-sialyltransferase 5	RAB3C	RAB3C, member RAS oncogene family	SSX2IP	SSX family member 2 interacting protein	CCDC167	coiled-coil domain containing 167	SECISBP2	SECIS binding protein 2			MED6	mediator complex subunit 6	DPP6	dipeptidyl peptidase like 6	EMC2	ER membrane protein complex subunit 2	SNPH	syntaphilin	AGBL4	ATP/GTP binding protein like 4	GJB2	gap junction protein beta 2	SV2B	synaptic vesicle glycoprotein 2B	FGD6	FYVE, RhoGEF and PH domain containing 6	MLH1	mutL homolog 1
ATG14	autophagy related 14			SPTLC2	serine palmitoyltransferase long chain base subunit 2	GUCY1A2	guanylate cyclase 1 soluble subunit alpha 2			PNISR	PNN interacting serine and arginine rich protein	MAML1	mastermind like transcriptional coactivator 1	MAML1	mastermind like transcriptional coactivator 1	IQCA1	IQ motif containing with AAA domain 1			UPP2	uridine phosphorylase 2	ZNF648	zinc finger protein 648	PCGF5	polycomb group ring finger 5	PPP4R2	protein phosphatase 4 regulatory subunit 2	NRIP3	nuclear receptor interacting protein 3			ACAT2	acetyl-CoA acetyltransferase 2	ZNF737	zinc finger protein 737	ZNF330	zinc finger protein 330	ZNF346	zinc finger protein 346	CCN2	cellular communication network factor 2	ZNF154	zinc finger protein 154	FTO	FTO, alpha-ketoglutarate dependent dioxygenase	BHLHE40	basic helix-loop-helix family member e40	EDEM3	ER degradation enhancing alpha-mannosidase like protein 3
TIPRL	TOR signaling pathway regulator			MCTP2	multiple C2 and transmembrane domain containing 2	MYO3B	myosin IIIB			RCAN2	regulator of calcineurin 2	EIF4EBP1	eukaryotic translation initiation factor 4E binding protein 1	EIF4EBP1	eukaryotic translation initiation factor 4E binding protein 1	ZFP2	ZFP2 zinc finger protein			SLC39A8	solute carrier family 39 member 8	OCLM	oculomedin	FOSB	FosB proto-oncogene, AP-1 transcription factor subunit	LAP3	leucine aminopeptidase 3	SEC16A	SEC16 homolog A, endoplasmic reticulum export factor			ANKRD20A3	ankyrin repeat domain 20 family member A3	RPL36A	ribosomal protein L36a	RELL1	RELT like 1	RAB6B	RAB6B, member RAS oncogene family	CDK2AP1	cyclin dependent kinase 2 associated protein 1	TUBA1B	tubulin alpha 1b	ACVR1B	activin A receptor type 1B	GLRB	glycine receptor beta	ZEB1	zinc finger E-box binding homeobox 1
MAP2K1	mitogen-activated protein kinase kinase 1			UBP1	upstream binding protein 1	ETS1	ETS proto-oncogene 1, transcription factor			ARHGAP31	Rho GTPase activating protein 31	ARFGEF2	ADP ribosylation factor guanine nucleotide exchange factor 2	ARFGEF2	ADP ribosylation factor guanine nucleotide exchange factor 2	H1FOO	H1 histone family member O oocyte specific			YWHAE	tyrosine 3-monooxygenase/tryptophan 5-monooxygenase activation protein epsilon	B3GALT2	beta-1,3-galactosyltransferase 2	HYPK	huntingtin interacting protein K	TUBB2B	tubulin beta 2B class IIb	SNX19	sorting nexin 19			STK39	serine/threonine kinase 39	EPX	eosinophil peroxidase	ADAM17	ADAM metallopeptidase domain 17	EPOP	elongin BC and polycomb repressive complex 2 associated protein	GRB14	growth factor receptor bound protein 14	P3H4	prolyl 3-hydroxylase family member 4 (non-enzymatic)	ZNRF1	zinc and ring finger 1	MAP10	microtubule associated protein 10	TENT5A	terminal nucleotidyltransferase 5A
HIPK2	homeodomain interacting protein kinase 2			SPTB	spectrin beta, erythrocytic	DGKH	diacylglycerol kinase eta			CTCFL	CCCTC-binding factor like	CSF3R	colony stimulating factor 3 receptor	CSF3R	colony stimulating factor 3 receptor	HYAL3	hyaluronidase 3			PLCG2	phospholipase C gamma 2	PGBD1	piggyBac transposable element derived 1	FAM135B	family with sequence similarity 135 member B	ATL3	atlastin GTPase 3	ZNF426	zinc finger protein 426			SESN3	sestrin 3	GUCY1A1	guanylate cyclase 1 soluble subunit alpha 1	GTF3C3	general transcription factor IIIC subunit 3	ZNF426	zinc finger protein 426	TSEN15	tRNA splicing endonuclease subunit 15	ZNF770	zinc finger protein 770	IKZF2	IKAROS family zinc finger 2	ANKRD13C	ankyrin repeat domain 13C	C1orf21	chromosome 1 open reading frame 21
IRX5	iroquois homeobox 5			METRN	meteorin, glial cell differentiation regulator	HELZ	helicase with zinc finger			FKBP7	FKBP prolyl isomerase 7	KCNMA1	potassium calcium-activated channel subfamily M alpha 1	KCNMA1	potassium calcium-activated channel subfamily M alpha 1	ZNF814	zinc finger protein 814			ZNF124	zinc finger protein 124	AIF1L	allograft inflammatory factor 1 like	SEPHS1	selenophosphate synthetase 1	CD24	CD24 molecule	TIMM13	translocase of inner mitochondrial membrane 13			ANGPTL5	angiopoietin like 5	YBX1	Y-box binding protein 1	TNFSF4	TNF superfamily member 4	SECISBP2	SECIS binding protein 2	TRIM36	tripartite motif containing 36	DKK1	dickkopf WNT signaling pathway inhibitor 1	PAPOLA	poly(A) polymerase alpha	TMEM121B	transmembrane protein 121B	ZFP42	ZFP42 zinc finger protein
CPEB1	cytoplasmic polyadenylation element binding protein 1			NFIB	nuclear factor I B	PIK3CB	phosphatidylinositol-4,5-bisphosphate 3-kinase catalytic subunit beta			NTS	neurotensin	MCU	mitochondrial calcium uniporter	MCU	mitochondrial calcium uniporter	STX11	syntaxin 11			ZNF765	zinc finger protein 765	RPAP3	RNA polymerase II associated protein 3	NHLRC3	NHL repeat containing 3	SGIP1	SH3 domain GRB2 like endophilin interacting protein 1	RCSD1	RCSD domain containing 1			VAMP7	vesicle associated membrane protein 7	NETO1	neuropilin and tolloid like 1	CTSL	cathepsin L	NXPH3	neurexophilin 3	TET1	tet methylcytosine dioxygenase 1	AMER2	APC membrane recruitment protein 2	PPM1A	protein phosphatase, Mg2+/Mn2+ dependent 1A	UBN2	ubinuclein 2	NBR1	NBR1, autophagy cargo receptor
IKZF2	IKAROS family zinc finger 2			NFATC2	nuclear factor of activated T cells 2	EPHA5	EPH receptor A5			TJP1	tight junction protein 1	TNFSF4	TNF superfamily member 4	TNFSF4	TNF superfamily member 4	C3orf18	chromosome 3 open reading frame 18			IFNA16	interferon alpha 16	TBC1D30	TBC1 domain family member 30	NBEA	neurobeachin	WAPL	WAPL cohesin release factor	SPIN3	spindlin family member 3			BRWD1	bromodomain and WD repeat domain containing 1	SVEP1	sushi, von Willebrand factor type A, EGF and pentraxin domain containing 1	ASCC3	activating signal cointegrator 1 complex subunit 3	SEC16A	SEC16 homolog A, endoplasmic reticulum export factor	ZFP1	ZFP1 zinc finger protein	TMEM106A	transmembrane protein 106A	WBP11	WW domain binding protein 11	MPZL2	myelin protein zero like 2	KIF5B	kinesin family member 5B
GLOD4	glyoxalase domain containing 4			ZNF827	zinc finger protein 827	ZNF830	zinc finger protein 830			ZNF704	zinc finger protein 704	ELOF1	elongation factor 1 homolog	ELOF1	elongation factor 1 homolog	FCAR	Fc fragment of IgA receptor			BBS9	Bardet-Biedl syndrome 9	GAB2	GRB2 associated binding protein 2	OPRK1	opioid receptor kappa 1	PI4K2B	phosphatidylinositol 4-kinase type 2 beta	MAX	MYC associated factor X			INO80D	INO80 complex subunit D	MAP2	microtubule associated protein 2	COMMD2	COMM domain containing 2	SNX19	sorting nexin 19	GUCY1A1	guanylate cyclase 1 soluble subunit alpha 1	KLF12	Kruppel like factor 12	ZNF346	zinc finger protein 346	PIP5K1A	phosphatidylinositol-4-phosphate 5-kinase type 1 alpha	PCID2	PCI domain containing 2
ACSL5	acyl-CoA synthetase long chain family member 5			TEAD1	TEA domain transcription factor 1	MED1	mediator complex subunit 1			PHC1	polyhomeotic homolog 1	XPR1	xenotropic and polytropic retrovirus receptor 1	XPR1	xenotropic and polytropic retrovirus receptor 1	ISL1	ISL LIM homeobox 1			ZNF529	zinc finger protein 529	MMP28	matrix metallopeptidase 28	NBEAL2	neurobeachin like 2	MEGF8	multiple EGF like domains 8	EHD2	EH domain containing 2			PARP8	poly(ADP-ribose) polymerase family member 8	RNF126	ring finger protein 126	TBX18	T-box 18	TIMM13	translocase of inner mitochondrial membrane 13	FCHO2	FCH domain only 2	SFSWAP	splicing factor SWAP	MRI1	methylthioribose-1-phosphate isomerase 1	MCRIP1	MAPK regulated corepressor interacting protein 1	RBM12B	RNA binding motif protein 12B
OCM2	oncomodulin 2			ATG2B	autophagy related 2B	KPNA4	karyopherin subunit alpha 4			ARL5B	ADP ribosylation factor like GTPase 5B	EYA1	EYA transcriptional coactivator and phosphatase 1	EYA1	EYA transcriptional coactivator and phosphatase 1	GRM1	glutamate metabotropic receptor 1			ZIC1	Zic family member 1	C9orf40	chromosome 9 open reading frame 40	ZBTB20	zinc finger and BTB domain containing 20	HAS3	hyaluronan synthase 3	CCL21	C-C motif chemokine ligand 21			MGAM	maltase-glucoamylase	MYO1F	myosin IF	ATMIN	ATM interactor	RCSD1	RCSD domain containing 1	C21orf91	chromosome 21 open reading frame 91	MSL2	MSL complex subunit 2	PPP2R2D	protein phosphatase 2 regulatory subunit Bdelta	FOXJ2	forkhead box J2	PRKACB	protein kinase cAMP-activated catalytic subunit beta
CGNL1	cingulin like 1			YME1L1	YME1 like 1 ATPase	GALNT4	polypeptide N-acetylgalactosaminyltransferase 4			KIR2DS4	killer cell immunoglobulin like receptor, two Ig domains and short cytoplasmic tail 4	MBTPS2	membrane bound transcription factor peptidase, site 2	MBTPS2	membrane bound transcription factor peptidase, site 2	HAL	histidine ammonia-lyase			EML1	EMAP like 1	CAMSAP1	calmodulin regulated spectrin associated protein 1	SLITRK6	SLIT and NTRK like family member 6	ATXN1	ataxin 1	EPB41L2	erythrocyte membrane protein band 4.1 like 2			ZIC3	Zic family member 3	ALDH5A1	aldehyde dehydrogenase 5 family member A1	BROX	BRO1 domain and CAAX motif containing	EHD2	EH domain containing 2	MYT1L	myelin transcription factor 1 like	CHD1L	chromodomain helicase DNA binding protein 1 like	IKZF1	IKAROS family zinc finger 1	HIF1AN	hypoxia inducible factor 1 subunit alpha inhibitor	GRIA4	glutamate ionotropic receptor AMPA type subunit 4
AFF1	AF4/FMR2 family member 1			GLP2R	glucagon like peptide 2 receptor	POC1B-GALNT4	POC1B-GALNT4 readthrough			C14orf132	chromosome 14 open reading frame 132	SNAP25	synaptosome associated protein 25	SNAP25	synaptosome associated protein 25	TPT1	tumor protein, translationally-controlled 1			CTTN	cortactin	PDIA6	protein disulfide isomerase family A member 6	LOX	lysyl oxidase	BCL11A	BCL11A, BAF complex component	CHST3	carbohydrate sulfotransferase 3			SNCA	synuclein alpha	CD274	CD274 molecule	TTC30A	tetratricopeptide repeat domain 30A	SPIN3	spindlin family member 3	RAB8B	RAB8B, member RAS oncogene family	TM7SF3	transmembrane 7 superfamily member 3	C9orf47	chromosome 9 open reading frame 47	JCAD	junctional cadherin 5 associated	CDK17	cyclin dependent kinase 17
ARCN1	archain 1			CCDC78	coiled-coil domain containing 78	G3BP2	G3BP stress granule assembly factor 2			ICAM1	intercellular adhesion molecule 1	MIER3	MIER family member 3	MIER3	MIER family member 3	SCN2B	sodium voltage-gated channel beta subunit 2			EIF5B	eukaryotic translation initiation factor 5B	YOD1	YOD1 deubiquitinase	CD59	CD59 molecule (CD59 blood group)	LHX2	LIM homeobox 2	SLC16A2	solute carrier family 16 member 2			C11orf87	chromosome 11 open reading frame 87	AKTIP	AKT interacting protein	ZNF423	zinc finger protein 423	MAX	MYC associated factor X	CDK15	cyclin dependent kinase 15	ZNF320	zinc finger protein 320	PIP4K2B	phosphatidylinositol-5-phosphate 4-kinase type 2 beta	NFAT5	nuclear factor of activated T cells 5	PDE12	phosphodiesterase 12
VSTM2A	V-set and transmembrane domain containing 2A			RC3H2	ring finger and CCCH-type domains 2	PTN	pleiotrophin			DBF4	DBF4 zinc finger	ZNF444	zinc finger protein 444	ZNF444	zinc finger protein 444	IKZF4	IKAROS family zinc finger 4			HSPA1L	heat shock protein family A (Hsp70) member 1 like	COX20	cytochrome c oxidase assembly factor COX20	BCAT1	branched chain amino acid transaminase 1	SETBP1	SET binding protein 1	PRKRIP1	PRKR interacting protein 1			HS3ST4	heparan sulfate-glucosamine 3-sulfotransferase 4	PAX5	paired box 5	FSIP1	fibrous sheath interacting protein 1	FCRLA	Fc receptor like A	USP48	ubiquitin specific peptidase 48	CKAP2L	cytoskeleton associated protein 2 like	DBT	dihydrolipoamide branched chain transacylase E2	ZXDC	ZXD family zinc finger C	MAN1A2	mannosidase alpha class 1A member 2
LRAT	lecithin retinol acyltransferase			NAA10	N(alpha)-acetyltransferase 10, NatA catalytic subunit	ZNF891	zinc finger protein 891			SNX33	sorting nexin 33	DVL2	dishevelled segment polarity protein 2	DVL2	dishevelled segment polarity protein 2	MRPS25	mitochondrial ribosomal protein S25			IFNA4	interferon alpha 4	SLC25A21	solute carrier family 25 member 21	SRSF1	serine and arginine rich splicing factor 1	ENTPD1	ectonucleoside triphosphate diphosphohydrolase 1	SLC25A22	solute carrier family 25 member 22			RGS16	regulator of G protein signaling 16	INCA1	inhibitor of CDK, cyclin A1 interacting protein 1	GOLGA3	golgin A3	CCL21	C-C motif chemokine ligand 21	VWA2	von Willebrand factor A domain containing 2	TIPRL	TOR signaling pathway regulator	IBA57	IBA57, iron-sulfur cluster assembly	ACSL4	acyl-CoA synthetase long chain family member 4	PLD1	phospholipase D1
CHST11	carbohydrate sulfotransferase 11			LY6G5B	lymphocyte antigen 6 family member G5B	ARL17A	ADP ribosylation factor like GTPase 17A			STK4	serine/threonine kinase 4	C11orf21	chromosome 11 open reading frame 21	C11orf21	chromosome 11 open reading frame 21	GATD1	glutamine amidotransferase like class 1 domain containing 1			IFNA10	interferon alpha 10	MTDH	metadherin	FOXN3	forkhead box N3	AZI2	5-azacytidine induced 2	SLC27A1	solute carrier family 27 member 1			ASB9	ankyrin repeat and SOCS box containing 9	DTL	denticleless E3 ubiquitin protein ligase homolog	HOMER1	homer scaffold protein 1	EPB41L2	erythrocyte membrane protein band 4.1 like 2	PTCD3	pentatricopeptide repeat domain 3	GEMIN8	gem nuclear organelle associated protein 8	RSF1	remodeling and spacing factor 1	SRGAP2	SLIT-ROBO Rho GTPase activating protein 2	RBMY1E	RNA binding motif protein, Y-linked, family 1, member E
OCM	oncomodulin			SLITRK4	SLIT and NTRK like family member 4	LMLN	leishmanolysin like peptidase			ANO5	anoctamin 5	ZNF704	zinc finger protein 704	ZNF704	zinc finger protein 704	SLC38A3	solute carrier family 38 member 3			TNKS	tankyrase	PRICKLE2	prickle planar cell polarity protein 2	SMC2	structural maintenance of chromosomes 2	ATXN7	ataxin 7	NKAIN1	sodium/potassium transporting ATPase interacting 1			GALNT1	polypeptide N-acetylgalactosaminyltransferase 1	FADS1	fatty acid desaturase 1	TCF12	transcription factor 12	SLC27A1	solute carrier family 27 member 1	SOS1	SOS Ras/Rac guanine nucleotide exchange factor 1	CRKL	CRK like proto-oncogene, adaptor protein	GMFB	glia maturation factor beta	C5orf24	chromosome 5 open reading frame 24	B3GALT1	beta-1,3-galactosyltransferase 1
DZIP1	DAZ interacting zinc finger protein 1			NSUN7	NOP2/Sun RNA methyltransferase family member 7	SSX2IP	SSX family member 2 interacting protein			IQSEC1	IQ motif and Sec7 domain 1	ARHGEF3	Rho guanine nucleotide exchange factor 3	ARHGEF3	Rho guanine nucleotide exchange factor 3	KRT73	keratin 73			ALDH6A1	aldehyde dehydrogenase 6 family member A1	SESTD1	SEC14 and spectrin domain containing 1	UGT8	UDP glycosyltransferase 8	GPR26	G protein-coupled receptor 26	EARS2	glutamyl-tRNA synthetase 2, mitochondrial			SLC2A1	solute carrier family 2 member 1	TMEM143	transmembrane protein 143	SGIP1	SH3 domain GRB2 like endophilin interacting protein 1	SLC16A2	solute carrier family 16 member 2	ANKRD13A	ankyrin repeat domain 13A	QKI	QKI, KH domain containing RNA binding	DHRS11	dehydrogenase/reductase 11	DCAF7	DDB1 and CUL4 associated factor 7	MFAP3L	microfibril associated protein 3 like
MBD2	methyl-CpG binding domain protein 2			PARD3	par-3 family cell polarity regulator	WDR93	WD repeat domain 93			TMOD2	tropomodulin 2	DUSP16	dual specificity phosphatase 16	DUSP16	dual specificity phosphatase 16	PPP2R1B	protein phosphatase 2 scaffold subunit Abeta			IFNA17	interferon alpha 17	SHROOM3	shroom family member 3	ZNF514	zinc finger protein 514	GAB1	GRB2 associated binding protein 1	OAT	ornithine aminotransferase			SLC8A1	solute carrier family 8 member A1	SHTN1	shootin 1	DGKH	diacylglycerol kinase eta	TANC2	tetratricopeptide repeat, ankyrin repeat and coiled-coil containing 2	TNFRSF19	TNF receptor superfamily member 19	IMPAD1	inositol monophosphatase domain containing 1	TGFBR1	transforming growth factor beta receptor 1	PEAK1	pseudopodium enriched atypical kinase 1	RDX	radixin
NXF1	nuclear RNA export factor 1			RBM7	RNA binding motif protein 7	RPS3A	ribosomal protein S3A			ZBTB20	zinc finger and BTB domain containing 20	TSR1	TSR1, ribosome maturation factor	TSR1	TSR1, ribosome maturation factor	ITPRID2	ITPR interacting domain containing 2			ZFP1	ZFP1 zinc finger protein	MICU2	mitochondrial calcium uptake 2	GTF3C4	general transcription factor IIIC subunit 4	CALN1	calneuron 1	FOXK1	forkhead box K1			POLR1D	RNA polymerase I and III subunit D	ZNF440	zinc finger protein 440	YME1L1	YME1 like 1 ATPase	PRKRIP1	PRKR interacting protein 1	CCDC91	coiled-coil domain containing 91	CNKSR2	connector enhancer of kinase suppressor of Ras 2	KRTAP3-1	keratin associated protein 3-1	IL18BP	interleukin 18 binding protein	CHD2	chromodomain helicase DNA binding protein 2
GCLC	glutamate-cysteine ligase catalytic subunit			AFF2	AF4/FMR2 family member 2	UBXN7	UBX domain protein 7			VSX1	visual system homeobox 1	SLC35E2A	solute carrier family 35 member E2A	SLC35E2A	solute carrier family 35 member E2A	PLEKHM3	pleckstrin homology domain containing M3			TIGIT	T cell immunoreceptor with Ig and ITIM domains	LYZ	lysozyme	UBQLN1	ubiquilin 1	CLEC3A	C-type lectin domain family 3 member A	ANGPT4	angiopoietin 4			JAZF1	JAZF zinc finger 1	FSTL4	follistatin like 4	CACNB4	calcium voltage-gated channel auxiliary subunit beta 4	CHST3	carbohydrate sulfotransferase 3	MSMO1	methylsterol monooxygenase 1	WDR31	WD repeat domain 31	IKZF3	IKAROS family zinc finger 3	NFATC2	nuclear factor of activated T cells 2	ZNF562	zinc finger protein 562
KDM3A	lysine demethylase 3A			AQP3	aquaporin 3 (Gill blood group)	ZNF41	zinc finger protein 41			OPRM1	opioid receptor mu 1	PHF21A	PHD finger protein 21A	PHF21A	PHD finger protein 21A	DOC2B	double C2 domain beta			ZBTB33	zinc finger and BTB domain containing 33	CALB1	calbindin 1	RAD50	RAD50 double strand break repair protein	SENP6	SUMO specific peptidase 6	BRINP2	BMP/retinoic acid inducible neural specific 2			DLC1	DLC1 Rho GTPase activating protein	LAT2	linker for activation of T cells family member 2	LMLN	leishmanolysin like peptidase	SLC25A22	solute carrier family 25 member 22	ZNF714	zinc finger protein 714	DEPDC5	DEP domain containing 5	ZNF805	zinc finger protein 805	THRA	thyroid hormone receptor alpha	SH3TC2	SH3 domain and tetratricopeptide repeats 2
CYP2B6	cytochrome P450 family 2 subfamily B member 6			SLC16A1	solute carrier family 16 member 1	ARHGAP5	Rho GTPase activating protein 5			DCAF10	DDB1 and CUL4 associated factor 10	TENT4B	terminal nucleotidyltransferase 4B	TENT4B	terminal nucleotidyltransferase 4B	ZNF709	zinc finger protein 709			SDC4	syndecan 4	CCBE1	collagen and calcium binding EGF domains 1	SLC30A8	solute carrier family 30 member 8	ZNF385B	zinc finger protein 385B	FBRS	fibrosin			IFT80	intraflagellar transport 80	PPP2R2D	protein phosphatase 2 regulatory subunit Bdelta	HOXD3	homeobox D3	ANGPT4	angiopoietin 4	MAP3K13	mitogen-activated protein kinase kinase kinase 13	ALKBH4	alkB homolog 4, lysine demethylase	ATRX	ATRX, chromatin remodeler	NAB1	NGFI-A binding protein 1	SLCO1A2	solute carrier organic anion transporter family member 1A2
IQSEC3	IQ motif and Sec7 domain 3			TMEM64	transmembrane protein 64	NR2C2	nuclear receptor subfamily 2 group C member 2			ASPH	aspartate beta-hydroxylase	TTC14	tetratricopeptide repeat domain 14	TTC14	tetratricopeptide repeat domain 14	CDCP1	CUB domain containing protein 1			GOLPH3	golgi phosphoprotein 3	IPMK	inositol polyphosphate multikinase	ARFGEF3	ARFGEF family member 3	SRSF10	serine and arginine rich splicing factor 10	ITGBL1	integrin subunit beta like 1			HNRNPL	heterogeneous nuclear ribonucleoprotein L	SIMC1	SUMO interacting motifs containing 1	ADRA1A	adrenoceptor alpha 1A	NKAIN1	sodium/potassium transporting ATPase interacting 1	PAPOLA	poly(A) polymerase alpha	ATP6V1B2	ATPase H+ transporting V1 subunit B2	HERC4	HECT and RLD domain containing E3 ubiquitin protein ligase 4	AGPS	alkylglycerone phosphate synthase	NQO1	NAD(P)H quinone dehydrogenase 1
ATP9B	ATPase phospholipid transporting 9B (putative)					CSNK1G1	casein kinase 1 gamma 1			ST8SIA4	ST8 alpha-N-acetyl-neuraminide alpha-2,8-sialyltransferase 4	SLX4	SLX4 structure-specific endonuclease subunit	SLX4	SLX4 structure-specific endonuclease subunit	TPD52	tumor protein D52			CSN3	casein kappa	C20orf194	chromosome 20 open reading frame 194	MYH15	myosin heavy chain 15	RBM11	RNA binding motif protein 11	L3MBTL2	L3MBTL2, polycomb repressive complex 1 subunit			PPP3CB	protein phosphatase 3 catalytic subunit beta	PALM2	paralemmin 2	PCDH17	protocadherin 17	EARS2	glutamyl-tRNA synthetase 2, mitochondrial	ALDH5A1	aldehyde dehydrogenase 5 family member A1	CPSF6	cleavage and polyadenylation specific factor 6	CWC27	CWC27 spliceosome associated protein homolog	RNASE13	ribonuclease A family member 13 (inactive)	KIAA0513	KIAA0513
SLCO3A1	solute carrier organic anion transporter family member 3A1					NEMP1	nuclear envelope integral membrane protein 1			SOX13	SRY-box 13	GPATCH2L	G-patch domain containing 2 like	GPATCH2L	G-patch domain containing 2 like	GPR85	G protein-coupled receptor 85			WDR73	WD repeat domain 73	C10orf53	chromosome 10 open reading frame 53	SHC3	SHC adaptor protein 3	DCLK1	doublecortin like kinase 1	MAPT	microtubule associated protein tau			PLG	plasminogen	KRTAP4-12	keratin associated protein 4-12	HOMER2	homer scaffold protein 2	OAT	ornithine aminotransferase	LPP	LIM domain containing preferred translocation partner in lipoma	IKZF3	IKAROS family zinc finger 3	ILF3	interleukin enhancer binding factor 3	KCNIP2	potassium voltage-gated channel interacting protein 2	CCSER2	coiled-coil serine rich protein 2
ZNF43	zinc finger protein 43					DIP2C	disco interacting protein 2 homolog C			CREB3L2	cAMP responsive element binding protein 3 like 2	ANKRD54	ankyrin repeat domain 54	ANKRD54	ankyrin repeat domain 54	RALGPS2	Ral GEF with PH domain and SH3 binding motif 2			ITGB1	integrin subunit beta 1	MMP8	matrix metallopeptidase 8	FRZB	frizzled related protein	TBX22	T-box 22	PIEZO2	piezo type mechanosensitive ion channel component 2			B2M	beta-2-microglobulin	ARHGAP26	Rho GTPase activating protein 26	SUZ12	SUZ12, polycomb repressive complex 2 subunit	MICU1	mitochondrial calcium uptake 1	GAD1	glutamate decarboxylase 1	CCR2	C-C motif chemokine receptor 2	SCN7A	sodium voltage-gated channel alpha subunit 7	SKIDA1	SKI/DACH domain containing 1	NTNG1	netrin G1
LGALS8	galectin 8					ME1	malic enzyme 1			C5orf47	chromosome 5 open reading frame 47	ATG5	autophagy related 5	ATG5	autophagy related 5	ASB7	ankyrin repeat and SOCS box containing 7			FOXN3	forkhead box N3	PYGO2	pygopus family PHD finger 2	TOR1B	torsin family 1 member B	TIGIT	T cell immunoreceptor with Ig and ITIM domains	HSPBAP1	HSPB1 associated protein 1			ERH	ERH, mRNA splicing and mitosis factor	PDK2	pyruvate dehydrogenase kinase 2	FAM135B	family with sequence similarity 135 member B	SLC1A2	solute carrier family 1 member 2	PLXNA2	plexin A2	RNF146	ring finger protein 146	ASCC1	activating signal cointegrator 1 complex subunit 1	YLPM1	YLP motif containing 1	NANOG	Nanog homeobox
STK35	serine/threonine kinase 35					C10orf25	chromosome 10 open reading frame 25			TMEM56	transmembrane protein 56	LGALS12	galectin 12	LGALS12	galectin 12	PARVA	parvin alpha			DTWD2	DTW domain containing 2	LRP2BP	LRP2 binding protein	SMG7	SMG7, nonsense mediated mRNA decay factor	WASHC2A	WASH complex subunit 2A	DDA1	DET1 and DDB1 associated 1			LATS1	large tumor suppressor kinase 1	PPP1R12B	protein phosphatase 1 regulatory subunit 12B	OSBPL8	oxysterol binding protein like 8	OC90	otoconin 90	SEC14L1	SEC14 like lipid binding 1	CYTIP	cytohesin 1 interacting protein	HSD17B7	hydroxysteroid 17-beta dehydrogenase 7	SEMA6D	semaphorin 6D	ELOVL5	ELOVL fatty acid elongase 5
SAP30BP	SAP30 binding protein					CKAP2	cytoskeleton associated protein 2			TXNDC16	thioredoxin domain containing 16	ARL6IP5	ADP ribosylation factor like GTPase 6 interacting protein 5	ARL6IP5	ADP ribosylation factor like GTPase 6 interacting protein 5	SYT1	synaptotagmin 1			FMNL3	formin like 3	PAX9	paired box 9	PCDH17	protocadherin 17	DPF3	double PHD fingers 3	PAK1	p21 (RAC1) activated kinase 1			PREPL	prolyl endopeptidase like	RNF8	ring finger protein 8	SLC35B4	solute carrier family 35 member B4	RFT1	RFT1 homolog	C16orf70	chromosome 16 open reading frame 70	CSRNP3	cysteine and serine rich nuclear protein 3	MS4A12	membrane spanning 4-domains A12	AVEN	apoptosis and caspase activation inhibitor	USP33	ubiquitin specific peptidase 33
FBXO32	F-box protein 32					ZNF701	zinc finger protein 701			ELMOD3	ELMO domain containing 3	ATCAY	ATCAY, caytaxin	ATCAY	ATCAY, caytaxin	CDK2AP2	cyclin dependent kinase 2 associated protein 2			RAMAC	RNA guanine-7 methyltransferase activating subunit	RAP2B	RAP2B, member of RAS oncogene family	AGO4	argonaute RISC catalytic component 4	TRPM8	transient receptor potential cation channel subfamily M member 8	TREML2	triggering receptor expressed on myeloid cells like 2			RSF1	remodeling and spacing factor 1	NSD2	nuclear receptor binding SET domain protein 2	HARS	histidyl-tRNA synthetase	ALG1	ALG1, chitobiosyldiphosphodolichol beta-mannosyltransferase	HSPA12A	heat shock protein family A (Hsp70) member 12A	HAUS2	HAUS augmin like complex subunit 2	AKAP13	A-kinase anchoring protein 13	ZFHX2	zinc finger homeobox 2	COL4A3BP	collagen type IV alpha 3 binding protein
RAB3B	RAB3B, member RAS oncogene family					KIRREL1	kirre like nephrin family adhesion molecule 1			PPFIBP1	PPFIA binding protein 1	GATAD2A	GATA zinc finger domain containing 2A	GATAD2A	GATA zinc finger domain containing 2A	LOC101927844	uncharacterized LOC101927844			AFAP1L1	actin filament associated protein 1 like 1	MLIP	muscular LMNA interacting protein	CDH7	cadherin 7	PMPCB	peptidase, mitochondrial processing beta subunit	ARHGAP31	Rho GTPase activating protein 31			POLDIP3	DNA polymerase delta interacting protein 3	RTN4	reticulon 4	SPRY4	sprouty RTK signaling antagonist 4	FOXK1	forkhead box K1	YWHAQ	tyrosine 3-monooxygenase/tryptophan 5-monooxygenase activation protein theta	KIAA0930	KIAA0930	COPS4	COP9 signalosome subunit 4	CHRDL1	chordin like 1	ERH	ERH, mRNA splicing and mitosis factor
TLDC2	TBC/LysM-associated domain containing 2					WNK3	WNK lysine deficient protein kinase 3			RBAK	RB associated KRAB zinc finger	SFSWAP	splicing factor SWAP	SFSWAP	splicing factor SWAP	CXorf40B	chromosome X open reading frame 40B			NREP	neuronal regeneration related protein	YTHDC2	YTH domain containing 2	ADARB2	adenosine deaminase, RNA specific B2 (inactive)	RPRD1A	regulation of nuclear pre-mRNA domain containing 1A	SEMA4D	semaphorin 4D			PHF14	PHD finger protein 14	EFHC2	EF-hand domain containing 2	TEX30	testis expressed 30	TPD52L2	TPD52 like 2	PEX19	peroxisomal biogenesis factor 19	ARFGEF3	ARFGEF family member 3	RIOK2	RIO kinase 2	ZEB2	zinc finger E-box binding homeobox 2	SNX5	sorting nexin 5
ADA2	adenosine deaminase 2					BDH2	3-hydroxybutyrate dehydrogenase 2			UMAD1	UBAP1-MVB12-associated (UMA) domain containing 1	COG7	component of oligomeric golgi complex 7	COG7	component of oligomeric golgi complex 7	KIAA1211L	KIAA1211 like			PPFIA1	PTPRF interacting protein alpha 1	IQGAP2	IQ motif containing GTPase activating protein 2	ACTL10	actin like 10	NUDT9	nudix hydrolase 9	SYT11	synaptotagmin 11			PIK3C2B	phosphatidylinositol-4-phosphate 3-kinase catalytic subunit type 2 beta	EVA1A	eva-1 homolog A, regulator of programmed cell death	PCDH19	protocadherin 19	RAB3B	RAB3B, member RAS oncogene family	CRHR2	corticotropin releasing hormone receptor 2	DKK2	dickkopf WNT signaling pathway inhibitor 2	PRKCI	protein kinase C iota	LIF	LIF, interleukin 6 family cytokine	GOSR1	golgi SNAP receptor complex member 1
RNF144A	ring finger protein 144A					RUNX1T1	RUNX1 translocation partner 1			GJA5	gap junction protein alpha 5	PTPN11	protein tyrosine phosphatase, non-receptor type 11	PTPN11	protein tyrosine phosphatase, non-receptor type 11	VPS53	VPS53, GARP complex subunit			PGAM1	phosphoglycerate mutase 1	ITGB1BP1	integrin subunit beta 1 binding protein 1	RAB11A	RAB11A, member RAS oncogene family	WDFY3	WD repeat and FYVE domain containing 3	C5orf66	chromosome 5 open reading frame 66			BEND7	BEN domain containing 7	LYVE1	lymphatic vessel endothelial hyaluronan receptor 1	F2R	coagulation factor II thrombin receptor	FBRS	fibrosin	ABAT	4-aminobutyrate aminotransferas	FNDC3A	fibronectin type III domain containing 3A	SLC24A4	solute carrier family 24 member 4	EPHB2	EPH receptor B2	KIAA1958	KIAA1958
ZNF287	zinc finger protein 287					MTDH	metadherin			HIF1AN	hypoxia inducible factor 1 subunit alpha inhibitor	PLLP	plasmolipin	PLLP	plasmolipin	FAM13B	family with sequence similarity 13 member B			PRRG1	proline rich and Gla domain 1	RNF103	ring finger protein 103	BLZF1	basic leucine zipper nuclear factor 1	PAQR9	progestin and adipoQ receptor family member 9	TTC31	tetratricopeptide repeat domain 31			TRPC1	transient receptor potential cation channel subfamily C member 1	HSD17B14	hydroxysteroid 17-beta dehydrogenase 14	HAUS2	HAUS augmin like complex subunit 2	NUDT14	nudix hydrolase 14			COX20	cytochrome c oxidase assembly factor COX20	CEP83	centrosomal protein 83	NACC2	NACC family member 2	EFNA5	ephrin A5
ZC3HAV1L	zinc finger CCCH-type containing, antiviral 1 like					OSBPL11	oxysterol binding protein like 11			PKHD1	PKHD1, fibrocystin/polyductin	ZNF135	zinc finger protein 135	ZNF135	zinc finger protein 135	ARFGEF2	ADP ribosylation factor guanine nucleotide exchange factor 2			VOPP1	VOPP1, WBP1/VOPP1 family member	NEB	nebulin	ALG12	ALG12, alpha-1,6-mannosyltransferase	DMRT3	doublesex and mab-3 related transcription factor 3	PLEC	plectin			PCDH18	protocadherin 18	ARFGEF2	ADP ribosylation factor guanine nucleotide exchange factor 2	PLEKHH2	pleckstrin homology, MyTH4 and FERM domain containing H2	ITGBL1	integrin subunit beta like 1			MTCL1	microtubule crosslinking factor 1	SLF2	SMC5-SMC6 complex localization factor 2	SHTN1	shootin 1	GUCA1B	guanylate cyclase activator 1B
SLC16A2	solute carrier family 16 member 2					GABARAPL2	GABA type A receptor associated protein like 2			SIRT1	sirtuin 1	PCGF3	polycomb group ring finger 3	PCGF3	polycomb group ring finger 3	INSYN1	inhibitory synaptic factor 1			SOHLH2	spermatogenesis and oogenesis specific basic helix-loop-helix 2	SQLE	squalene epoxidase	EIF3G	eukaryotic translation initiation factor 3 subunit G	CYLC2	cylicin 2	ASAP1	ArfGAP with SH3 domain, ankyrin repeat and PH domain 1			APOOL	apolipoprotein O like	PHIP	pleckstrin homology domain interacting protein	ZBTB21	zinc finger and BTB domain containing 21	L3MBTL2	L3MBTL2, polycomb repressive complex 1 subunit			DYRK2	dual specificity tyrosine phosphorylation regulated kinase 2	ZNF641	zinc finger protein 641	BAALC	BAALC, MAP3K1 and KLF4 binding	TECPR2	tectonin beta-propeller repeat containing 2
ZIC4	Zic family member 4					SATB2	SATB homeobox 2			TERF2	telomeric repeat binding factor 2	STAG1	stromal antigen 1	STAG1	stromal antigen 1	PCDHB4	protocadherin beta 4			CCDC169-SOHLH2	CCDC169-SOHLH2 readthrough	TNFRSF1A	TNF receptor superfamily member 1A	GSPT1	G1 to S phase transition 1	DUSP28	dual specificity phosphatase 28	CASTOR2	cytosolic arginine sensor for mTORC1 subunit 2			DLX2	distal-less homeobox 2	KCNJ6	potassium voltage-gated channel subfamily J member 6	PEX3	peroxisomal biogenesis factor 3	SERPINF2	serpin family F member 2			BACH2	BTB domain and CNC homolog 2	FBXL3	F-box and leucine rich repeat protein 3	TRPV3	transient receptor potential cation channel subfamily V member 3	TMEM17	transmembrane protein 17
COLGALT1	collagen beta(1-O)galactosyltransferase 1					NKX3-1	NK3 homeobox 1			H6PD	hexose-6-phosphate dehydrogenase/glucose 1-dehydrogenase	VPS37A	VPS37A, ESCRT-I subunit	VPS37A	VPS37A, ESCRT-I subunit	VPS4A	vacuolar protein sorting 4 homolog A			CADM2	cell adhesion molecule 2	NKAIN3	sodium/potassium transporting ATPase interacting 3	DHH	desert hedgehog signaling molecule	BCAT1	branched chain amino acid transaminase 1	APLNR	apelin receptor			MOCS2	molybdenum cofactor synthesis 2	GFPT2	glutamine-fructose-6-phosphate transaminase 2	NAT2	N-acetyltransferase 2	PIEZO2	piezo type mechanosensitive ion channel component 2			GK5	glycerol kinase 5	LMAN1	lectin, mannose binding 1	PHACTR4	phosphatase and actin regulator 4	NLGN3	neuroligin 3
ZCCHC17	zinc finger CCHC-type containing 17					GRPEL2	GrpE like 2, mitochondrial			SAMD12	sterile alpha motif domain containing 12	GALNT10	polypeptide N-acetylgalactosaminyltransferase 10	GALNT10	polypeptide N-acetylgalactosaminyltransferase 10	SHROOM2	shroom family member 2			CTDNEP1	CTD nuclear envelope phosphatase 1	CTAGE6	CTAGE family member 6	PLPPR4	phospholipid phosphatase related 4	NRXN1	neurexin 1	CSF1	colony stimulating factor 1			ELF2	E74 like ETS transcription factor 2	RAB36	RAB36, member RAS oncogene family	HEATR5B	HEAT repeat containing 5B	PLEC	plectin			KCNAB1	potassium voltage-gated channel subfamily A member regulatory beta subunit 1	FAM19A2	family with sequence similarity 19 member A2, C-C motif chemokine like	RALGAPA1	Ral GTPase activating protein catalytic alpha subunit 1	MCTP2	multiple C2 and transmembrane domain containing 2
PI15	peptidase inhibitor 15					EIF2S1	eukaryotic translation initiation factor 2 subunit alpha			MFSD4A	major facilitator superfamily domain containing 4A	GPHN	gephyrin	GPHN	gephyrin	ESPNL	espin like			MDN1	midasin AAA ATPase 1	CTAGE15	CTAGE family member 15	PAX4	paired box 4	USP31	ubiquitin specific peptidase 31	PHC2	polyhomeotic homolog 2			ZNF215	zinc finger protein 215	DLC1	DLC1 Rho GTPase activating protein	SCN7A	sodium voltage-gated channel alpha subunit 7	HSPBAP1	HSPB1 associated protein 1			SPTLC1	serine palmitoyltransferase long chain base subunit 1	LRP6	LDL receptor related protein 6	IL5RA	interleukin 5 receptor subunit alpha	KAT6A	lysine acetyltransferase 6A
PHF2	PHD finger protein 2					HACE1	HECT domain and ankyrin repeat containing E3 ubiquitin protein ligase 1			TP53BP2	tumor protein p53 binding protein 2	EFNB3	ephrin B3	EFNB3	ephrin B3	ORAI2	ORAI calcium release-activated calcium modulator 2			TNRC18	trinucleotide repeat containing 18	RAB9A	RAB9A, member RAS oncogene family	MED13	mediator complex subunit 13	LILRB3	leukocyte immunoglobulin like receptor B3	MICU1	mitochondrial calcium uptake 1			CLCA2	chloride channel accessory 2	DAZAP2	DAZ associated protein 2	ZNF24	zinc finger protein 24	RD3	retinal degeneration 3, GUCY2D regulator			SETD9	SET domain containing 9	CARD6	caspase recruitment domain family member 6	KDM7A	lysine demethylase 7A	RELN	reelin
ZMIZ1	zinc finger MIZ-type containing 1					KLF8	Kruppel like factor 8			CLEC1A	C-type lectin domain family 1 member A	ARMC7	armadillo repeat containing 7	ARMC7	armadillo repeat containing 7	RALGDS	ral guanine nucleotide dissociation stimulator			ZNF185	zinc finger protein 185 with LIM domain	VASH2	vasohibin 2	SLC25A53	solute carrier family 25 member 53	IL17C	interleukin 17C	ELMO2	engulfment and cell motility 2			MMRN1	multimerin 1	UNC5D	unc-5 netrin receptor D	UBR1	ubiquitin protein ligase E3 component n-recognin 1	ATRN	attractin			ZNF714	zinc finger protein 714	NF2	neurofibromin 2	ASCC1	activating signal cointegrator 1 complex subunit 1	DCC	DCC netrin 1 receptor
SRPRB	SRP receptor subunit beta					MYEOV	myeloma overexpressed			SOX5	SRY-box 5	GAS7	growth arrest specific 7	GAS7	growth arrest specific 7	TLCD2	TLC domain containing 2			FANCA	FA complementation group A	LIMS1	LIM zinc finger domain containing 1	CSAD	cysteine sulfinic acid decarboxylase	SPON1	spondin 1	RPRD1B	regulation of nuclear pre-mRNA domain containing 1B			ZNF706	zinc finger protein 706	FRMPD2	FERM and PDZ domain containing 2	CLOCK	clock circadian regulator	PAK1	p21 (RAC1) activated kinase 1			ARFGEF1	ADP ribosylation factor guanine nucleotide exchange factor 1	SLC25A33	solute carrier family 25 member 33	OPRPN	opiorphin prepropeptide	CTNNA3	catenin alpha 3
RNLS	renalase, FAD dependent amine oxidase					KIF20B	kinesin family member 20B			TMEM25	transmembrane protein 25	FAAH2	fatty acid amide hydrolase 2	FAAH2	fatty acid amide hydrolase 2	HSPA14	heat shock protein family A (Hsp70) member 14			ZNF181	zinc finger protein 181	LRRC8C	leucine rich repeat containing 8 VRAC subunit C	EPB41	erythrocyte membrane protein band 4.1	ZNF266	zinc finger protein 266	RFT1	RFT1 homolog			MIB1	mindbomb E3 ubiquitin protein ligase 1	PRSS12	serine protease 12	HNF4G	hepatocyte nuclear factor 4 gamma	MAPT	microtubule associated protein tau			CASP3	caspase 3	RAP2B	RAP2B, member of RAS oncogene family	RAB5B	RAB5B, member RAS oncogene family	ZNF189	zinc finger protein 189
PIK3CB	phosphatidylinositol-4,5-bisphosphate 3-kinase catalytic subunit beta					SLC25A21	solute carrier family 25 member 21			KIR2DL4	killer cell immunoglobulin like receptor, two Ig domains and long cytoplasmic tail 4	ZNF518A	zinc finger protein 518A	ZNF518A	zinc finger protein 518A	LRRTM2	leucine rich repeat transmembrane neuronal 2			SPARC	secreted protein acidic and cysteine rich	CLU	clusterin	LMTK2	lemur tyrosine kinase 2	SCN3B	sodium voltage-gated channel beta subunit 3	MED13L	mediator complex subunit 13 like			ZFP30	ZFP30 zinc finger protein	PA2G4	proliferation-associated 2G4	RSPH4A	radial spoke head component 4A	ARHGAP31	Rho GTPase activating protein 31			CRIM1	cysteine rich transmembrane BMP regulator 1	PCDH18	protocadherin 18	SMARCE1	SWI/SNF related, matrix associated, actin dependent regulator of chromatin, subfamily e, member 1	NCL	nucleolin
NDUFA10	NADH:ubiquinone oxidoreductase subunit A10					NEPRO	nucleolus and neural progenitor protein			RORB	RAR related orphan receptor B	LENG8	leukocyte receptor cluster member 8	LENG8	leukocyte receptor cluster member 8	CAP1	cyclase associated actin cytoskeleton regulatory protein 1			SOX17	SRY-box 17	APOLD1	apolipoprotein L domain containing 1	TMEM125	transmembrane protein 125	CELF4	CUGBP Elav-like family member 4	FCRL5	Fc receptor like 5			SLC30A8	solute carrier family 30 member 8	DVL3	dishevelled segment polarity protein 3	CASKIN1	CASK interacting protein 1	SEMA4D	semaphorin 4D			GNAQ	G protein subunit alpha q	GPC6	glypican 6	TMEM184B	transmembrane protein 184B	DOK6	docking protein 6
C14orf119	chromosome 14 open reading frame 119					RFC1	replication factor C subunit 1			SPRTN	SprT-like N-terminal domain	SIM2	SIM bHLH transcription factor 2	SIM2	SIM bHLH transcription factor 2	EPB41L1	erythrocyte membrane protein band 4.1 like 1			CACNB2	calcium voltage-gated channel auxiliary subunit beta 2	ATP6V0D2	ATPase H+ transporting V0 subunit d2	PCDH7	protocadherin 7	MAOB	monoamine oxidase B	SYNGR1	synaptogyrin 1			LILRB4	leukocyte immunoglobulin like receptor B4	SMLR1	small leucine rich protein 1	IL20RA	interleukin 20 receptor subunit alpha	SYT11	synaptotagmin 11			MCUR1	mitochondrial calcium uniporter regulator 1	S1PR2	sphingosine-1-phosphate receptor 2	VAMP1	vesicle associated membrane protein 1	DNAJC25	DnaJ heat shock protein family (Hsp40) member C25
RNF213	ring finger protein 213					ZNF100	zinc finger protein 100			KDM5C	lysine demethylase 5C	SMAP2	small ArfGAP2	SMAP2	small ArfGAP2	ZFP91	ZFP91 zinc finger protein			AEN	apoptosis enhancing nuclease	MED13L	mediator complex subunit 13 like	CFAP298	cilia and flagella associated protein 298	MLYCD	malonyl-CoA decarboxylase	PRKACB	protein kinase cAMP-activated catalytic subunit beta			GUCA1B	guanylate cyclase activator 1B	IFITM3	interferon induced transmembrane protein 3	ANKRD22	ankyrin repeat domain 22	CASTOR2	cytosolic arginine sensor for mTORC1 subunit 2			ZNF276	zinc finger protein 276	KCNG3	potassium voltage-gated channel modifier subfamily G member 3	RPS6KA6	ribosomal protein S6 kinase A6	KDM6B	lysine demethylase 6B
ZNF587	zinc finger protein 587					HIKESHI	Hikeshi, heat shock protein nuclear import factor			DTX4	deltex E3 ubiquitin ligase 4	KLHDC10	kelch domain containing 10	KLHDC10	kelch domain containing 10	DTWD2	DTW domain containing 2			ZNF845	zinc finger protein 845	AICDA	activation induced cytidine deaminase	SPAG9	sperm associated antigen 9	CPD	carboxypeptidase D	REL	REL proto-oncogene, NF-kB subunit			MYT1L	myelin transcription factor 1 like	PBX1	PBX homeobox 1	PRPSAP2	phosphoribosyl pyrophosphate synthetase associated protein 2	TTBK1	tau tubulin kinase 1			MN1	MN1 proto-oncogene, transcriptional regulator	MUC21	mucin 21, cell surface associated	RAD18	RAD18, E3 ubiquitin protein ligase	PHLDB2	pleckstrin homology like domain family B member 2
NYX	nyctalopin					FNDC3B	fibronectin type III domain containing 3B			RAD18	RAD18, E3 ubiquitin protein ligase	ATP8A1	ATPase phospholipid transporting 8A1	ATP8A1	ATPase phospholipid transporting 8A1	SLC22A15	solute carrier family 22 member 15			ZNF34	zinc finger protein 34	ANKS1B	ankyrin repeat and sterile alpha motif domain containing 1B	NTNG1	netrin G1	SPTLC3	serine palmitoyltransferase long chain base subunit 3	TANC2	tetratricopeptide repeat, ankyrin repeat and coiled-coil containing 2			CA13	carbonic anhydrase 13	TMEM268	transmembrane protein 268	MTMR1	myotubularin related protein 1	TREML2	triggering receptor expressed on myeloid cells like 2			AJAP1	adherens junctions associated protein 1	ZFYVE26	zinc finger FYVE-type containing 26	KIF21B	kinesin family member 21B	ARRDC4	arrestin domain containing 4
FHL2	four and a half LIM domains 2					PPP1R12B	protein phosphatase 1 regulatory subunit 12B			ELF2	E74 like ETS transcription factor 2	RHBDD1	rhomboid domain containing 1	RHBDD1	rhomboid domain containing 1	ZDHHC16	zinc finger DHHC-type containing 16			TMEM232	transmembrane protein 232	HMGB3	high mobility group box 3	GLE1	GLE1, RNA export mediator	PPP3CB	protein phosphatase 3 catalytic subunit beta	VPS26A	VPS26, retromer complex component A			CPEB2	cytoplasmic polyadenylation element binding protein 2	GCM2	glial cells missing transcription factor 2	ASB8	ankyrin repeat and SOCS box containing 8	ASAP1	ArfGAP with SH3 domain, ankyrin repeat and PH domain 1			ZNF688	zinc finger protein 688	LAMP2	lysosomal associated membrane protein 2	ENAH	ENAH, actin regulator	TWSG1	twisted gastrulation BMP signaling modulator 1
ATF5	activating transcription factor 5					TSPAN5	tetraspanin 5			MTF2	metal response element binding transcription factor 2	ZCCHC14	zinc finger CCHC-type containing 14	ZCCHC14	zinc finger CCHC-type containing 14	POLH	DNA polymerase eta			PRRG4	proline rich and Gla domain 4	WWP2	WW domain containing E3 ubiquitin protein ligase 2	FLRT3	fibronectin leucine rich transmembrane protein 3	NCAPD3	non-SMC condensin II complex subunit D3	C22orf24	chromosome 22 open reading frame 24			BMS1	BMS1, ribosome biogenesis factor	BBOF1	basal body orientation factor 1	GINS4	GINS complex subunit 4	APLNR	apelin receptor			CASP6	caspase 6	KDM1A	lysine demethylase 1A	SLC29A2	solute carrier family 29 member 2	MAN1A1	mannosidase alpha class 1A member 1
EZH1	enhancer of zeste 1 polycomb repressive complex 2 subunit					DGKB	diacylglycerol kinase beta			BVES	blood vessel epicardial substance	YPEL4	yippee like 4	YPEL4	yippee like 4	CEACAM5	carcinoembryonic antigen related cell adhesion molecule 5			ARHGAP6	Rho GTPase activating protein 6	TPBG	trophoblast glycoprotein	STAMBP	STAM binding protein	GLCE	glucuronic acid epimerase	RD3	retinal degeneration 3, GUCY2D regulator			CTSV	cathepsin V	RNF43	ring finger protein 43	MXD1	MAX dimerization protein 1	C22orf24	chromosome 22 open reading frame 24			LRRFIP1	LRR binding FLII interacting protein 1	GHITM	growth hormone inducible transmembrane protein	VCL	vinculin	SPOCK2	SPARC (osteonectin), cwcv and kazal like domains proteoglycan 2
PREX2	phosphatidylinositol-3,4,5-trisphosphate dependent Rac exchange factor 2					BUB3	BUB3, mitotic checkpoint protein			SEH1L	SEH1 like nucleoporin	TMEM178B	transmembrane protein 178B	TMEM178B	transmembrane protein 178B	ZNF7	zinc finger protein 7			ASPH	aspartate beta-hydroxylase	MFSD9	major facilitator superfamily domain containing 9	INAFM2	InaF motif containing 2	FAM163B	family with sequence similarity 163 member B	CCDC157	coiled-coil domain containing 157			CACNB4	calcium voltage-gated channel auxiliary subunit beta 4	CASTOR2	cytosolic arginine sensor for mTORC1 subunit 2	LARP4B	La ribonucleoprotein domain family member 4B	CSF1	colony stimulating factor 1			USP49	ubiquitin specific peptidase 49	F11	coagulation factor XI	FMNL3	formin like 3	POLR2M	RNA polymerase II subunit M
STN1	STN1, CST complex subunit					AQP1	aquaporin 1 (Colton blood group)			AGO1	argonaute RISC catalytic component 1	SAE1	SUMO1 activating enzyme subunit 1	SAE1	SUMO1 activating enzyme subunit 1	ZNF614	zinc finger protein 614			SYK	spleen associated tyrosine kinase	SELENOI	selenoprotein I	RYK	receptor-like tyrosine kinase	GGA2	golgi associated, gamma adaptin ear containing, ARF binding protein 2	ALG1	ALG1, chitobiosyldiphosphodolichol beta-mannosyltransferase			SERF1B	small EDRK-rich factor 1B	CD200R1	CD200 receptor 1	YWHAG	tyrosine 3-monooxygenase/tryptophan 5-monooxygenase activation protein gamma	PHC2	polyhomeotic homolog 2			DCAF16	DDB1 and CUL4 associated factor 16	ANKRD17	ankyrin repeat domain 17	CABLES1	Cdk5 and Abl enzyme substrate 1	GCOM1	GRINL1A complex locus 1
TOP3A	DNA topoisomerase III alpha					PDE7B	phosphodiesterase 7B			GRM1	glutamate metabotropic receptor 1	CDR2L	cerebellar degeneration related protein 2 like	CDR2L	cerebellar degeneration related protein 2 like	ALDH8A1	aldehyde dehydrogenase 8 family member A1			CHRNE	cholinergic receptor nicotinic epsilon subunit	WIF1	WNT inhibitory factor 1	MAP3K12	mitogen-activated protein kinase kinase kinase 12	KCNMB1	potassium calcium-activated channel subfamily M regulatory beta subunit 1	FCRLA	Fc receptor like A			UBE4A	ubiquitination factor E4A	AFF3	AF4/FMR2 family member 3	MSN	moesin	SGSM2	small G protein signaling modulator 2			SUPT6H	SPT6 homolog, histone chaperone	DCP2	decapping mRNA 2	FBXW11	F-box and WD repeat domain containing 11	IFNLR1	interferon lambda receptor 1
TVP23A	trans-golgi network vesicle protein 23 homolog A					MCTS1	MCTS1, re-initiation and release factor			SOCS6	suppressor of cytokine signaling 6	FAM78B	family with sequence similarity 78 member B	FAM78B	family with sequence similarity 78 member B	SLC22A5	solute carrier family 22 member 5			ZNF440	zinc finger protein 440	ZNF225	zinc finger protein 225	ANGPT2	angiopoietin 2	MRPS33	mitochondrial ribosomal protein S33	ADGRG5	adhesion G protein-coupled receptor G5			SYNPO2	synaptopodin 2	ZNF541	zinc finger protein 541	BRSK1	BR serine/threonine kinase 1	ELMO2	engulfment and cell motility 2			GHRHR	growth hormone releasing hormone receptor	CSMD3	CUB and Sushi multiple domains 3	BROX	BRO1 domain and CAAX motif containing	JUND	JunD proto-oncogene, AP-1 transcription factor subunit
C8orf48	chromosome 8 open reading frame 48					ZNF608	zinc finger protein 608			SIRT2	sirtuin 2	DHDDS	dehydrodolichyl diphosphate synthase subunit	DHDDS	dehydrodolichyl diphosphate synthase subunit	HTN1	histatin 1			FRMD4B	FERM domain containing 4B	PLEKHM3	pleckstrin homology domain containing M3	EIF4EBP2	eukaryotic translation initiation factor 4E binding protein 2	MYO15A	myosin XVA	GJB2	gap junction protein beta 2			ACVR1C	activin A receptor type 1C	ZNF652	zinc finger protein 652	CDH8	cadherin 8	RPRD1B	regulation of nuclear pre-mRNA domain containing 1B			KREMEN1	kringle containing transmembrane protein 1	AWAT2	acyl-CoA wax alcohol acyltransferase 2	TMEM132B	transmembrane protein 132B	SDC2	syndecan 2
2008-03-01	membrane associated ring-CH-type finger 8					CPLX1	complexin 1			PVR	poliovirus receptor	RIMS3	regulating synaptic membrane exocytosis 3	RIMS3	regulating synaptic membrane exocytosis 3	CWC25	CWC25 spliceosome associated protein homolog			ZNF544	zinc finger protein 544	UGCG	UDP-glucose ceramide glucosyltransferase	CNOT10	CCR4-NOT transcription complex subunit 10	AIMP1	aminoacyl tRNA synthetase complex interacting multifunctional protein 1	ATRN	attractin			TMEM17	transmembrane protein 17	PRELID3B	PRELI domain containing 3B	C20orf197	chromosome 20 open reading frame 197	REL	REL proto-oncogene, NF-kB subunit			KALRN	kalirin RhoGEF kinase	NETO1	neuropilin and tolloid like 1	PBRM1	polybromo 1	ATP23	ATP23 metallopeptidase and ATP synthase assembly factor homolog
CYYR1	cysteine and tyrosine rich 1					PPARGC1A	PPARG coactivator 1 alpha			SLFN5	schlafen family member 5	SMIM13	small integral membrane protein 13	SMIM13	small integral membrane protein 13	HTN3	histatin 3			SPATA5	spermatogenesis associated 5	CTPS1	CTP synthase 1	SAMD13	sterile alpha motif domain containing 13	LOC100287036	uncharacterized LOC100287036	HAP1	huntingtin associated protein 1			MPV17L	MPV17 mitochondrial inner membrane protein like	SLC35F2	solute carrier family 35 member F2	DIP2B	disco interacting protein 2 homolog B	MED13L	mediator complex subunit 13 like			METTL2B	methyltransferase like 2B	C6	complement C6	B4GALT1	beta-1,4-galactosyltransferase 1	SFT2D1	SFT2 domain containing 1
SYT4	synaptotagmin 4					PDE4D	phosphodiesterase 4D			CCNYL1	cyclin Y like 1	PEG10	paternally expressed 10	PEG10	paternally expressed 10	LRRC3B	leucine rich repeat containing 3B			CDK14	cyclin dependent kinase 14	CACUL1	CDK2 associated cullin domain 1	CAAP1	caspase activity and apoptosis inhibitor 1	MTRF1	mitochondrial translation release factor 1	ZNF585A	zinc finger protein 585A			PHF3	PHD finger protein 3	ADARB2	adenosine deaminase, RNA specific B2 (inactive)	ZDHHC21	zinc finger DHHC-type containing 21	FCRL5	Fc receptor like 5			SZT2	SZT2, KICSTOR complex subunit	MYO5C	myosin VC	GTF2A2	general transcription factor IIA subunit 2	HMGA2	high mobility group AT-hook 2
HECW2	HECT, C2 and WW domain containing E3 ubiquitin protein ligase 2					PASK	PAS domain containing serine/threonine kinase			UBXN2B	UBX domain protein 2B	WFDC10A	WAP four-disulfide core domain 10A	WFDC10A	WAP four-disulfide core domain 10A	BICDL1	BICD family like cargo adaptor 1			DLGAP4	DLG associated protein 4	THUMPD1	THUMP domain containing 1	GRIN2A	glutamate ionotropic receptor NMDA type subunit 2A	USP11	ubiquitin specific peptidase 11	ALX4	ALX homeobox 4			ZNF280B	zinc finger protein 280B	MRPS18A	mitochondrial ribosomal protein S18A	SUDS3	SDS3 homolog, SIN3A corepressor complex component	SYNGR1	synaptogyrin 1			CAND1	cullin associated and neddylation dissociated 1	RBBP9	RB binding protein 9, serine hydrolase	SLC35C1	solute carrier family 35 member C1	SASH1	SAM and SH3 domain containing 1
S100A7A	S100 calcium binding protein A7A					TPRG1	tumor protein p63 regulated 1			SOCS5	suppressor of cytokine signaling 5	RTL6	retrotransposon Gag like 6	RTL6	retrotransposon Gag like 6	CAMK1D	calcium/calmodulin dependent protein kinase ID			LCORL	ligand dependent nuclear receptor corepressor like	HNRNPU	heterogeneous nuclear ribonucleoprotein U	ZMAT3	zinc finger matrin-type 3	PRDM16	PR/SET domain 16	FAM71F2	family with sequence similarity 71 member F2			DOK5	docking protein 5	CD40	CD40 molecule	SLC33A1	solute carrier family 33 member 1	PRKACB	protein kinase cAMP-activated catalytic subunit beta			ZBTB8A	zinc finger and BTB domain containing 8A	PPHLN1	periphilin 1	CHD4	chromodomain helicase DNA binding protein 4	SCFD2	sec1 family domain containing 2
PLEKHM3	pleckstrin homology domain containing M3					USP12	ubiquitin specific peptidase 12			PCDH9	protocadherin 9	CREB3L2	cAMP responsive element binding protein 3 like 2	CREB3L2	cAMP responsive element binding protein 3 like 2	C1RL	complement C1r subcomponent like			PRIM2	DNA primase subunit 2	KIF21B	kinesin family member 21B	ZNF266	zinc finger protein 266	PRKAR2A	protein kinase cAMP-dependent type II regulatory subunit alpha	ANKUB1	ankyrin repeat and ubiquitin domain containing 1			ST18	ST18, C2H2C-type zinc finger	ESYT3	extended synaptotagmin 3	PDCD6IP	programmed cell death 6 interacting protein	VPS26A	VPS26, retromer complex component A			ZNF521	zinc finger protein 521	TRPA1	transient receptor potential cation channel subfamily A member 1	NCLN	nicalin	CEP72	centrosomal protein 72
PCLAF	PCNA clamp associated factor					MCC	MCC, WNT signaling pathway regulator			ARHGAP32	Rho GTPase activating protein 32	HSDL2	hydroxysteroid dehydrogenase like 2	HSDL2	hydroxysteroid dehydrogenase like 2	INKA2	inka box actin regulator 2			ILF3	interleukin enhancer binding factor 3	DSP	desmoplakin	ZNF664	zinc finger protein 664	NTN4	netrin 4	DGKI	diacylglycerol kinase iota			GOLPH3	golgi phosphoprotein 3	RLF	rearranged L-myc fusion	PAPOLA	poly(A) polymerase alpha	ZNF814	zinc finger protein 814			DENND2A	DENN domain containing 2A	CHIC1	cysteine rich hydrophobic domain 1	BTBD9	BTB domain containing 9	CDC42EP3	CDC42 effector protein 3
MYO6	myosin VI					USP47	ubiquitin specific peptidase 47			TCEAL6	transcription elongation factor A like 6	EFR3A	EFR3 homolog A	EFR3A	EFR3 homolog A	TMEM40	transmembrane protein 40			TP53INP1	tumor protein p53 inducible nuclear protein 1	GPD2	glycerol-3-phosphate dehydrogenase 2	SPOPL	speckle type BTB/POZ protein like	SLCO4C1	solute carrier organic anion transporter family member 4C1	GPR78	G protein-coupled receptor 78			PPP1R14B	protein phosphatase 1 regulatory inhibitor subunit 14B	ORC3	origin recognition complex subunit 3	SYT16	synaptotagmin 16	CCDC157	coiled-coil domain containing 157			PNPT1	polyribonucleotide nucleotidyltransferase 1	ANGEL2	angel homolog 2	TRIM66	tripartite motif containing 66	PHTF1	putative homeodomain transcription factor 1
CHST6	carbohydrate sulfotransferase 6					MS4A7	membrane spanning 4-domains A7			RBM27	RNA binding motif protein 27	ZNF827	zinc finger protein 827	ZNF827	zinc finger protein 827	ZNF264	zinc finger protein 264			PAPOLA	poly(A) polymerase alpha	KSR2	kinase suppressor of ras 2	LIN54	lin-54 DREAM MuvB core complex component	PGRMC2	progesterone receptor membrane component 2	ASGR2	asialoglycoprotein receptor 2			TRPS1	transcriptional repressor GATA binding 1	NLGN4Y	neuroligin 4 Y-linked	RTL9	retrotransposon Gag like 9	ADGRG5	adhesion G protein-coupled receptor G5			2014-09-01	septin 14	PCDH17	protocadherin 17	SRP54	signal recognition particle 54	SPRY3	sprouty RTK signaling antagonist 3
RIMS4	regulating synaptic membrane exocytosis 4					CPEB2	cytoplasmic polyadenylation element binding protein 2			TP53INP2	tumor protein p53 inducible nuclear protein 2	ZMIZ1	zinc finger MIZ-type containing 1	ZMIZ1	zinc finger MIZ-type containing 1	USP49	ubiquitin specific peptidase 49			TBRG1	transforming growth factor beta regulator 1	GABRG1	gamma-aminobutyric acid type A receptor gamma1 subunit	ZNF675	zinc finger protein 675	ACO1	aconitase 1	SGSM2	small G protein signaling modulator 2			LAMC1	laminin subunit gamma 1	GIGYF2	GRB10 interacting GYF protein 2	FGFR2	fibroblast growth factor receptor 2	FAM71F2	family with sequence similarity 71 member F2			SLC24A2	solute carrier family 24 member 2	PRR11	proline rich 11	YIPF3	Yip1 domain family member 3	SETD3	SET domain containing 3, actin histidine methyltransferase
KCMF1	potassium channel modulatory factor 1					ANKRD44	ankyrin repeat domain 44			ANKRD13A	ankyrin repeat domain 13A	HIF1A	hypoxia inducible factor 1 subunit alpha	HIF1A	hypoxia inducible factor 1 subunit alpha	TMEM104	transmembrane protein 104			HBS1L	HBS1 like translational GTPase	ROBO2	roundabout guidance receptor 2	ARPP19	cAMP regulated phosphoprotein 19	DLG5	discs large MAGUK scaffold protein 5	SH3BP2	SH3 domain binding protein 2			DOCK4	dedicator of cytokinesis 4	MECOM	MDS1 and EVI1 complex locus	PABPC1	poly(A) binding protein cytoplasmic 1	ETNK2	ethanolamine kinase 2			ZNF704	zinc finger protein 704	CLEC6A	C-type lectin domain containing 6A	ITPKA	inositol-trisphosphate 3-kinase A	ROR2	receptor tyrosine kinase like orphan receptor 2
SMAD4	SMAD family member 4					HORMAD2	HORMA domain containing 2			CLNS1A	chloride nucleotide-sensitive channel 1A	OPRM1	opioid receptor mu 1	OPRM1	opioid receptor mu 1	AP4S1	adaptor related protein complex 4 subunit sigma 1			KATNAL1	katanin catalytic subunit A1 like 1	XPR1	xenotropic and polytropic retrovirus receptor 1	RBFOX2	RNA binding fox-1 homolog 2	KIRREL2	kirre like nephrin family adhesion molecule 2	KIAA0408	KIAA0408			TBC1D8B	TBC1 domain family member 8B	TRPM3	transient receptor potential cation channel subfamily M member 3	DGKE	diacylglycerol kinase epsilon	ALX4	ALX homeobox 4			ERBB3	erb-b2 receptor tyrosine kinase 3	DKC1	dyskerin pseudouridine synthase 1	HTN1	histatin 1	MPP3	membrane palmitoylated protein 3
PLAGL2	PLAG1 like zinc finger 2					MYL10	myosin light chain 10			LAMP3	lysosomal associated membrane protein 3	KDM5C	lysine demethylase 5C	KDM5C	lysine demethylase 5C	MRTO4	MRT4 homolog, ribosome maturation factor			PRKCQ	protein kinase C theta	AKIRIN2	akirin 2	HNRNPC	heterogeneous nuclear ribonucleoprotein C (C1/C2)	IGF1R	insulin like growth factor 1 receptor	MTF1	metal regulatory transcription factor 1			PDCD6IP	programmed cell death 6 interacting protein	PTGES3L	prostaglandin E synthase 3 like	RNF217	ring finger protein 217	NUGGC	nuclear GTPase, germinal center associated			CBL	Cbl proto-oncogene	R3HDM2	R3H domain containing 2	PTPRC	protein tyrosine phosphatase, receptor type C	ARHGAP5	Rho GTPase activating protein 5
RNF8	ring finger protein 8					SP140	SP140 nuclear body protein			FBXL20	F-box and leucine rich repeat protein 20	SOX4	SRY-box 4	SOX4	SRY-box 4	INSYN2B	inhibitory synaptic factor family member 2B			MPIG6B	megakaryocyte and platelet inhibitory receptor G6b	JPH4	junctophilin 4	ZFHX4	zinc finger homeobox 4	RS1	retinoschisin 1	RAB3B	RAB3B, member RAS oncogene family			CCNG2	cyclin G2	CTCFL	CCCTC-binding factor like	PDSS2	decaprenyl diphosphate synthase subunit 2	HAP1	huntingtin associated protein 1			TRIO	trio Rho guanine nucleotide exchange factor	TENT5C	terminal nucleotidyltransferase 5C	NTRK3	neurotrophic receptor tyrosine kinase 3	TTN	titin
RASSF6	Ras association domain family member 6					SCN3A	sodium voltage-gated channel alpha subunit 3			LRRC58	leucine rich repeat containing 58	ADCY1	adenylate cyclase 1	ADCY1	adenylate cyclase 1	GNL3L	G protein nucleolar 3 like			ZNF326	zinc finger protein 326	ANGPTL1	angiopoietin like 1	RALBP1	ralA binding protein 1	CYP39A1	cytochrome P450 family 39 subfamily A member 1	ZFP41	ZFP41 zinc finger protein			BAZ1A	bromodomain adjacent to zinc finger domain 1A	TBC1D1	TBC1 domain family member 1	UVSSA	UV stimulated scaffold protein A	MTF1	metal regulatory transcription factor 1			RAB27A	RAB27A, member RAS oncogene family	CCNJ	cyclin J	SF1	splicing factor 1	TMX1	thioredoxin related transmembrane protein 1
KCNMA1	potassium calcium-activated channel subfamily M alpha 1					HSPH1	heat shock protein family H (Hsp110) member 1			SLC39A9	solute carrier family 39 member 9	TTC28	tetratricopeptide repeat domain 28	TTC28	tetratricopeptide repeat domain 28	KCNAB2	potassium voltage-gated channel subfamily A regulatory beta subunit 2			EFCAB13	EF-hand calcium binding domain 13	RASD2	RASD family member 2	TMEM212	transmembrane protein 212	UBD	ubiquitin D	NUDT14	nudix hydrolase 14			SEPHS1	selenophosphate synthetase 1	NDRG3	NDRG family member 3	C18orf63	chromosome 18 open reading frame 63	ZNF585A	zinc finger protein 585A			LUC7L3	LUC7 like 3 pre-mRNA splicing factor	MAP3K19	mitogen-activated protein kinase kinase kinase 19	VAT1	vesicle amine transport 1	TTC39B	tetratricopeptide repeat domain 39B
ORC3	origin recognition complex subunit 3					GNE	glucosamine (UDP-N-acetyl)-2-epimerase/N-acetylmannosamine kinase			ARGLU1	arginine and glutamate rich 1	DDX11	DEAD/H-box helicase 11	DDX11	DEAD/H-box helicase 11	VKORC1L1	vitamin K epoxide reductase complex subunit 1 like 1			CXorf40A	chromosome X open reading frame 40A	CASP3	caspase 3	PEX11A	peroxisomal biogenesis factor 11 alpha	DDHD2	DDHD domain containing 2	CCNE2	cyclin E2			TMEM50B	transmembrane protein 50B	FNDC5	fibronectin type III domain containing 5	GFPT1	glutamine--fructose-6-phosphate transaminase 1	ANKUB1	ankyrin repeat and ubiquitin domain containing 1			CTDSPL	CTD small phosphatase like	STX17	syntaxin 17	FCHSD1	FCH and double SH3 domains 1	GPM6A	glycoprotein M6A
PRCP	prolylcarboxypeptidase					IL12RB2	interleukin 12 receptor subunit beta 2			EPPIN	epididymal peptidase inhibitor	EIF3J	eukaryotic translation initiation factor 3 subunit J	EIF3J	eukaryotic translation initiation factor 3 subunit J	PRKAR2A	protein kinase cAMP-dependent type II regulatory subunit alpha			COLEC11	collectin subfamily member 11	MTX3	metaxin 3	KISS1	KiSS-1 metastasis suppressor	ALDH1B1	aldehyde dehydrogenase 1 family member B1	TCTA	T cell leukemia translocation altered			MS4A18	membrane spanning 4-domains A18	MAL	mal, T cell differentiation protein	PABPC3	poly(A) binding protein cytoplasmic 3	DGKI	diacylglycerol kinase iota			ANGEL2	angel homolog 2	TRMT9B	tRNA methyltransferase 9B (putative)	RFX7	regulatory factor X7	CLLU1OS	chronic lymphocytic leukemia up-regulated 1 opposite strand
CBSL	cystathionine-beta-synthase like					ZNF816-ZNF321P	ZNF816-ZNF321P readthrough			NDST2	N-deacetylase and N-sulfotransferase 2	SRRM4	serine/arginine repetitive matrix 4	SRRM4	serine/arginine repetitive matrix 4	ZNF445	zinc finger protein 445			ZNF121	zinc finger protein 121	RBM43	RNA binding motif protein 43	ANKRD1	ankyrin repeat domain 1	NEBL	nebulette	RRAGC	Ras related GTP binding C			PDHA1	pyruvate dehydrogenase E1 alpha 1 subunit	CLDN6	claudin 6	RC3H1	ring finger and CCCH-type domains 1	ASGR2	asialoglycoprotein receptor 2			C5orf51	chromosome 5 open reading frame 51	TRIM33	tripartite motif containing 33	SLC4A8	solute carrier family 4 member 8	C8orf48	chromosome 8 open reading frame 48
CBS	cystathionine-beta-synthase									SLC35F1	solute carrier family 35 member F1	SLC41A1	solute carrier family 41 member 1	SLC41A1	solute carrier family 41 member 1	CXorf40A	chromosome X open reading frame 40A			PAX4	paired box 4	LRRC2	leucine rich repeat containing 2	TMEM68	transmembrane protein 68	ZNF19	zinc finger protein 19	ZNF814	zinc finger protein 814			ICE2	interactor of little elongation complex ELL subunit 2	LMO3	LIM domain only 3	UBE2R2	ubiquitin conjugating enzyme E2 R2	MICAL2	microtubule associated monooxygenase, calponin and LIM domain containing 2			RBM43	RNA binding motif protein 43	KCNJ15	potassium voltage-gated channel subfamily J member 15	GALNT15	polypeptide N-acetylgalactosaminyltransferase 15	AZIN1	antizyme inhibitor 1
CCDC50	coiled-coil domain containing 50									SNCAIP	synuclein alpha interacting protein	SLC25A10	solute carrier family 25 member 10	SLC25A10	solute carrier family 25 member 10	BACE1	beta-secretase 1			HMGB1	high mobility group box 1	SPATA13	spermatogenesis associated 13	BHMT2	betaine--homocysteine S-methyltransferase 2	PER2	period circadian regulator 2	SFXN3	sideroflexin 3			N4BP2L1	NEDD4 binding protein 2 like 1	PIP5K1A	phosphatidylinositol-4-phosphate 5-kinase type 1 alpha	FZD6	frizzled class receptor 6	ZC3H12D	zinc finger CCCH-type containing 12D			SMARCC1	SWI/SNF related, matrix associated, actin dependent regulator of chromatin subfamily c member 1	PIK3C2A	phosphatidylinositol-4-phosphate 3-kinase catalytic subunit type 2 alpha	CWC27	CWC27 spliceosome associated protein homolog	TMEFF1	transmembrane protein with EGF like and two follistatin like domains 1
OSBPL6	oxysterol binding protein like 6									PPP1R3B	protein phosphatase 1 regulatory subunit 3B	RIMS4	regulating synaptic membrane exocytosis 4	RIMS4	regulating synaptic membrane exocytosis 4	AP3S2	adaptor related protein complex 3 subunit sigma 2			KCNH8	potassium voltage-gated channel subfamily H member 8	NLN	neurolysin	RAD1	RAD1 checkpoint DNA exonuclease	VAC14	Vac14, PIKFYVE complex component	NDRG3	NDRG family member 3			REEP1	receptor accessory protein 1	AKT3	AKT serine/threonine kinase 3	NR2C2	nuclear receptor subfamily 2 group C member 2	SH3BP2	SH3 domain binding protein 2			TMOD2	tropomodulin 2	MFSD8	major facilitator superfamily domain containing 8	APLNR	apelin receptor	MSANTD3-TMEFF1	MSANTD3-TMEFF1 readthrough
PODN	podocan									PIGA	phosphatidylinositol glycan anchor biosynthesis class A	WWC1	WW and C2 domain containing 1	WWC1	WW and C2 domain containing 1	SVIP	small VCP interacting protein			TRPC5	transient receptor potential cation channel subfamily C member 5	STIM1	stromal interaction molecule 1	CAMK4	calcium/calmodulin dependent protein kinase IV	SAMD4A	sterile alpha motif domain containing 4A	GOT2	glutamic-oxaloacetic transaminase 2			VAT1L	vesicle amine transport 1 like	MR1	major histocompatibility complex, class I-related	FARSB	phenylalanyl-tRNA synthetase subunit beta	GPR78	G protein-coupled receptor 78			MMGT1	membrane magnesium transporter 1	NAA50	N(alpha)-acetyltransferase 50, NatE catalytic subunit	ARL8B	ADP ribosylation factor like GTPase 8B	LPCAT2	lysophosphatidylcholine acyltransferase 2
DPYSL5	dihydropyrimidinase like 5									HNF1B	HNF1 homeobox B	RARRES1	retinoic acid receptor responder 1	RARRES1	retinoic acid receptor responder 1	ASL	argininosuccinate lyase			PSMD12	proteasome 26S subunit, non-ATPase 12	DUSP19	dual specificity phosphatase 19	KIAA0319	KIAA0319	ADAMTSL1	ADAMTS like 1	NUGGC	nuclear GTPase, germinal center associated			SNX20	sorting nexin 20	ATG13	autophagy related 13	OXCT1	3-oxoacid CoA-transferase 1	KIAA0408	KIAA0408			VEZT	vezatin, adherens junctions transmembrane protein	ZDHHC2	zinc finger DHHC-type containing 2	TNRC6C	trinucleotide repeat containing 6C	PKDCC	protein kinase domain containing, cytoplasmic
LSM8	LSM8 homolog, U6 small nuclear RNA associated									GNL1	G protein nucleolar 1 (putative)	RP2	RP2, ARL3 GTPase activating protein	RP2	RP2, ARL3 GTPase activating protein	VPS37A	VPS37A, ESCRT-I subunit			DCAF4L2	DDB1 and CUL4 associated factor 4 like 2	PNPLA8	patatin like phospholipase domain containing 8	TRIB1	tribbles pseudokinase 1	H2AFZ	H2A histone family member Z	DVL3	dishevelled segment polarity protein 3			RNF138	ring finger protein 138	RIMKLA	ribosomal modification protein rimK like family member A	FGF9	fibroblast growth factor 9	NBPF1	NBPF member 1			DCX	doublecortin	BAMBI	BMP and activin membrane bound inhibitor	SUGP2	SURP and G-patch domain containing 2	PTCH1	patched 1
PPTC7	PTC7 protein phosphatase homolog									CCDC88A	coiled-coil domain containing 88A	ST3GAL3	ST3 beta-galactoside alpha-2,3-sialyltransferase 3	ST3GAL3	ST3 beta-galactoside alpha-2,3-sialyltransferase 3	CNNM3	cyclin and CBS domain divalent metal cation transport mediator 3			LCP2	lymphocyte cytosolic protein 2	FRMD4B	FERM domain containing 4B	KRTAP19-3	keratin associated protein 19-3	PCDH17	protocadherin 17	MSN	moesin			AKAP5	A-kinase anchoring protein 5	CRHR2	corticotropin releasing hormone receptor 2	PHF14	PHD finger protein 14	ZFP41	ZFP41 zinc finger protein			NMT2	N-myristoyltransferase 2	TPT1	tumor protein, translationally-controlled 1	TBC1D2B	TBC1 domain family member 2B	SGMS1	sphingomyelin synthase 1
SLC44A1	solute carrier family 44 member 1									COG3	component of oligomeric golgi complex 3	ZNF780B	zinc finger protein 780B	ZNF780B	zinc finger protein 780B	C17orf75	chromosome 17 open reading frame 75			TMEM229B	transmembrane protein 229B	PDYN	prodynorphin	NKTR	natural killer cell triggering receptor	XKR6	XK related 6	CWF19L1	CWF19 like cell cycle control factor 1			GPALPP1	GPALPP motifs containing 1	ZNF784	zinc finger protein 784	MPC2	mitochondrial pyruvate carrier 2	CCNE2	cyclin E2			MKRN2OS	MKRN2 opposite strand	PTBP3	polypyrimidine tract binding protein 3	ST3GAL1	ST3 beta-galactoside alpha-2,3-sialyltransferase 1	FOXJ2	forkhead box J2
PSMA1	proteasome subunit alpha 1									SPATA1	spermatogenesis associated 1	GPR158	G protein-coupled receptor 158	GPR158	G protein-coupled receptor 158	TREM1	triggering receptor expressed on myeloid cells 1			SLC38A1	solute carrier family 38 member 1	CABYR	calcium binding tyrosine phosphorylation regulated	ZMYM5	zinc finger MYM-type containing 5	PPARGC1A	PPARG coactivator 1 alpha	COPS7B	COP9 signalosome subunit 7B			CDK14	cyclin dependent kinase 14	SLC25A37	solute carrier family 25 member 37	CD109	CD109 molecule	CEBPZOS	CEBPZ opposite strand			NOS3	nitric oxide synthase 3	KMT5B	lysine methyltransferase 5B	CD247	CD247 molecule	KLF6	Kruppel like factor 6
DNAJC3	DnaJ heat shock protein family (Hsp40) member C3									XPR1	xenotropic and polytropic retrovirus receptor 1	DUOXA1	dual oxidase maturation factor 1	DUOXA1	dual oxidase maturation factor 1	PLXDC2	plexin domain containing 2			HTN1	histatin 1	LBR	lamin B receptor	BEND4	BEN domain containing 4	MKX	mohawk homeobox	HIC2	HIC ZBTB transcriptional repressor 2			SLC25A16	solute carrier family 25 member 16	NBAS	neuroblastoma amplified sequence	CCDC122	coiled-coil domain containing 122	NDRG3	NDRG family member 3			TFCP2	transcription factor CP2	ATG2B	autophagy related 2B	ZBTB43	zinc finger and BTB domain containing 43	TMPRSS4	transmembrane serine protease 4
LOC101928120	uncharacterized LOC101928120									AKAP13	A-kinase anchoring protein 13	TET2	tet methylcytosine dioxygenase 2	TET2	tet methylcytosine dioxygenase 2	SNX27	sorting nexin family member 27			IARS	isoleucyl-tRNA synthetase	C1orf74	chromosome 1 open reading frame 74	HIP1R	huntingtin interacting protein 1 related	RNF170	ring finger protein 170	VSX2	visual system homeobox 2			CC2D2B	coiled-coil and C2 domain containing 2B	UBE2B	ubiquitin conjugating enzyme E2 B	OLA1	Obg like ATPase 1	AP3S2	adaptor related protein complex 3 subunit sigma 2			VPS53	VPS53, GARP complex subunit	GMEB2	glucocorticoid modulatory element binding protein 2	AADACL3	arylacetamide deacetylase like 3	SPART	spartin
ZNF471	zinc finger protein 471									ZFAT	zinc finger and AT-hook domain containing	QPRT	quinolinate phosphoribosyltransferase	QPRT	quinolinate phosphoribosyltransferase	SLC4A5	solute carrier family 4 member 5			FAM91A1	family with sequence similarity 91 member A1	DDX19A	DEAD-box helicase 19A	DUSP4	dual specificity phosphatase 4	TRAPPC6B	trafficking protein particle complex 6B	MAP7D1	MAP7 domain containing 1			MYLIP	myosin regulatory light chain interacting protein	SOHLH2	spermatogenesis and oogenesis specific basic helix-loop-helix 2	B3GLCT	beta 3-glucosyltransferase	ARPIN-AP3S2	ARPIN-AP3S2 readthrough			CEBPZOS	CEBPZ opposite strand	FOXK1	forkhead box K1	ATP2B4	ATPase plasma membrane Ca2+ transporting 4	THRAP3	thyroid hormone receptor associated protein 3
TMEM132C	transmembrane protein 132C									NR2C2	nuclear receptor subfamily 2 group C member 2	LYPD5	LY6/PLAUR domain containing 5	LYPD5	LY6/PLAUR domain containing 5	TPGS2	tubulin polyglutamylase complex subunit 2			AFF4	AF4/FMR2 family member 4	CLVS2	clavesin 2	CMPK1	cytidine/uridine monophosphate kinase 1	ADAM22	ADAM metallopeptidase domain 22	RHBDD2	rhomboid domain containing 2			DACT1	dishevelled binding antagonist of beta catenin 1	SYPL2	synaptophysin like 2	SPRED1	sprouty related EVH1 domain containing 1	TCTA	T cell leukemia translocation altered			TTLL11	tubulin tyrosine ligase like 11	RTN3	reticulon 3	NCSTN	nicastrin	IL20RB	interleukin 20 receptor subunit beta
TMED4	transmembrane p24 trafficking protein 4									PGAP3	post-GPI attachment to proteins 3	PAN3	poly(A) specific ribonuclease subunit PAN3	PAN3	poly(A) specific ribonuclease subunit PAN3	ZDHHC17	zinc finger DHHC-type containing 17			UPF3A	UPF3A, regulator of nonsense mediated mRNA decay	CNNM2	cyclin and CBS domain divalent metal cation transport mediator 2	C5orf15	chromosome 5 open reading frame 15	SEC62	SEC62 homolog, preprotein translocation factor	ZC3H12D	zinc finger CCCH-type containing 12D			MAN1A2	mannosidase alpha class 1A member 2	ANKRD34A	ankyrin repeat domain 34A	MON2	MON2 homolog, regulator of endosome-to-Golgi trafficking	RRAGC	Ras related GTP binding C			KPNA2	karyopherin subunit alpha 2	FAM126B	family with sequence similarity 126 member B	BCAT1	branched chain amino acid transaminase 1	FSD2	fibronectin type III and SPRY domain containing 2
FYCO1	FYVE and coiled-coil domain containing 1									CNOT8	CCR4-NOT transcription complex subunit 8	MAP3K11	mitogen-activated protein kinase kinase kinase 11	MAP3K11	mitogen-activated protein kinase kinase kinase 11	RYR3	ryanodine receptor 3			ITSN2	intersectin 2	ERICH1	glutamate rich 1	ACACA	acetyl-CoA carboxylase alpha	PLSCR4	phospholipid scramblase 4	KIF3C	kinesin family member 3C			PRUNE1	prune exopolyphosphatase 1	FAM168B	family with sequence similarity 168 member	ATAD2	ATPase family, AAA domain containing 2	PDPR	pyruvate dehydrogenase phosphatase regulatory subunit			UBE2V2	ubiquitin conjugating enzyme E2 V2	TMEM185B	transmembrane protein 185B	GLIPR1	GLI pathogenesis related 1	PPP1R12A	protein phosphatase 1 regulatory subunit 12A
IRGQ	immunity related GTPase Q									PPIL6	peptidylprolyl isomerase like 6	HIP1R	huntingtin interacting protein 1 related	HIP1R	huntingtin interacting protein 1 related	RAB21	RAB21, member RAS oncogene family			SEC61A2	Sec61 translocon alpha 2 subunit	LIM2	lens intrinsic membrane protein 2	AR	androgen receptor	C20orf85	chromosome 20 open reading frame 85	EGF	epidermal growth factor			MYT1	myelin transcription factor 1			KIAA1147	KIAA1147	SFXN3	sideroflexin 3			USP32	ubiquitin specific peptidase 32	ELOVL7	ELOVL fatty acid elongase 7	SCOC	short coiled-coil protein	SH3PXD2A	SH3 and PX domains 2A
CXorf40B	chromosome X open reading frame 40B									SIN3A	SIN3 transcription regulator family member A	RALGPS1	Ral GEF with PH domain and SH3 binding motif 1	RALGPS1	Ral GEF with PH domain and SH3 binding motif 1	QRFPR	pyroglutamylated RFamide peptide receptor			EPHA4	EPH receptor A4	ACOT13	acyl-CoA thioesterase 13	HSFY1	heat shock transcription factor Y-linked 1	UHMK1	U2AF homology motif kinase 1	GJC1	gap junction protein gamma 1			GNG12	G protein subunit gamma 12			FGG	fibrinogen gamma chain	GOT2	glutamic-oxaloacetic transaminase 2			SKI	SKI proto-oncogene	NUDT5	nudix hydrolase 5	CHIC1	cysteine rich hydrophobic domain 1	QDPR	quinoid dihydropteridine reductase
CASTOR2	cytosolic arginine sensor for mTORC1 subunit 2									SORBS2	sorbin and SH3 domain containing 2	KCNK15	potassium two pore domain channel subfamily K member 15	KCNK15	potassium two pore domain channel subfamily K member 15	THG1L	tRNA-histidine guanylyltransferase 1 like			ULK1	unc-51 like autophagy activating kinase 1	ERLIN2	ER lipid raft associated 2	HSFY2	heat shock transcription factor Y-linked 2	ZZZ3	zinc finger ZZ-type containing 3	SLC48A1	solute carrier family 48 member 1			ZFR	zinc finger RNA binding protein			WDFY1	WD repeat and FYVE domain containing 1	DVL3	dishevelled segment polarity protein 3			STS	steroid sulfatase	KPNA3	karyopherin subunit alpha 3	DRP2	dystrophin related protein 2	PDE6A	phosphodiesterase 6A
SLC6A7	solute carrier family 6 member 7									FCGR2B	Fc fragment of IgG receptor IIb	CASP3	caspase 3	CASP3	caspase 3	C17orf102	chromosome 17 open reading frame 102			MYO19	myosin XIX	PPAT	phosphoribosyl pyrophosphate amidotransferase	ZNF618	zinc finger protein 618	EDF1	endothelial differentiation related factor 1	TPD52L2	TPD52 like 2			TM9SF2	transmembrane 9 superfamily member 2			POLR1B	RNA polymerase I subunit B	CEACAM1	carcinoembryonic antigen related cell adhesion molecule 1			GCFC2	GC-rich sequence DNA-binding factor 2	CYP27C1	cytochrome P450 family 27 subfamily C member 1	APCDD1L	APC down-regulated 1 like	FAM168B	family with sequence similarity 168 member B
APPL2	adaptor protein, phosphotyrosine interacting with PH domain and leucine zipper 2									MARCKS	myristoylated alanine rich protein kinase C substrate	UIMC1	ubiquitin interaction motif containing 1	UIMC1	ubiquitin interaction motif containing 1	PROM2	prominin 2			AKAIN1	A-kinase anchor inhibitor 1	CACNB4	calcium voltage-gated channel auxiliary subunit beta 4	KCNN3	potassium calcium-activated channel subfamily N member 3	CREG2	cellular repressor of E1A stimulated genes 2	AP3S2	adaptor related protein complex 3 subunit sigma 2			TIFA	TRAF interacting protein with forkhead associated domain			RAB3B	RAB3B, member RAS oncogene family	MSN	moesin			UNC13C	unc-13 homolog C	PARP15	poly(ADP-ribose) polymerase family member 15	MID1	midline 1	NLN	neurolysin
NSUN7	NOP2/Sun RNA methyltransferase family member 7									LIMCH1	LIM and calponin homology domains 1	GPR85	G protein-coupled receptor 85	GPR85	G protein-coupled receptor 85	SLC9A7	solute carrier family 9 member A7			FAM189A2	family with sequence similarity 189 member A2	GADD45A	growth arrest and DNA damage inducible alpha	FUT9	fucosyltransferase 9	ERBB4	erb-b2 receptor tyrosine kinase 4	ARPIN-AP3S2	ARPIN-AP3S2 readthrough			NPL	N-acetylneuraminate pyruvate lyase			LSM8	LSM8 homolog, U6 small nuclear RNA associated	CWF19L1	CWF19 like cell cycle control factor 1			KLB	klotho beta	ZNF785	zinc finger protein 785	CREB5	cAMP responsive element binding protein 5	DENND4C	DENN domain containing 4C
ACSL1	acyl-CoA synthetase long chain family member 1									ZNF596	zinc finger protein 596	PPM1L	protein phosphatase, Mg2+/Mn2+ dependent 1L	PPM1L	protein phosphatase, Mg2+/Mn2+ dependent 1L	SNAP23	synaptosome associated protein 23			GLIS3	GLIS family zinc finger 3	GABRR2	gamma-aminobutyric acid type A receptor rho2 subunit	SETD9	SET domain containing 9	ENOPH1	enolase-phosphatase 1	GPR3	G protein-coupled receptor 3			PMP2	peripheral myelin protein 2			MUC7	mucin 7, secreted	COPS7B	COP9 signalosome subunit 7B			HCN1	hyperpolarization activated cyclic nucleotide gated potassium channel 1	ALG11	ALG11, alpha-1,2-mannosyltransferase	ADGRE2	adhesion G protein-coupled receptor E2	TTC9B	tetratricopeptide repeat domain 9B
ZNF736	zinc finger protein 736									IL10RB	interleukin 10 receptor subunit beta	ZNF609	zinc finger protein 609	ZNF609	zinc finger protein 609	SOCS7	suppressor of cytokine signaling 7			PDCD6IP	programmed cell death 6 interacting protein	FRS2	fibroblast growth factor receptor substrate 2	PPP1R17	protein phosphatase 1 regulatory subunit 17	CDX2	caudal type homeobox 2	CYP11B2	cytochrome P450 family 11 subfamily B member 2			AUTS2	AUTS2, activator of transcription and developmental regulator			TF	transferrin	HIC2	HIC ZBTB transcriptional repressor 2			EFNA5	ephrin A5	CLMN	calmin	ABL2	ABL proto-oncogene 2, non-receptor tyrosine kinase	KBTBD2	kelch repeat and BTB domain containing 2
CRIM1	cysteine rich transmembrane BMP regulator 1									C1orf141	chromosome 1 open reading frame 141	RHBDL3	rhomboid like 3	RHBDL3	rhomboid like 3	RNF24	ring finger protein 24			MBD3L2	methyl-CpG binding domain protein 3 like 2	PDSS2	decaprenyl diphosphate synthase subunit 2	DOK6	docking protein 6	VKORC1L1	vitamin K epoxide reductase complex subunit 1 like 1	MBOAT7	membrane bound O-acyltransferase domain containing 7			LPCAT2	lysophosphatidylcholine acyltransferase 2			AGO4	argonaute RISC catalytic component 4	VSX2	visual system homeobox 2			DDX51	DEAD-box helicase 51	REXO1	RNA exonuclease 1 homolog	ERCC6	ERCC excision repair 6, chromatin remodeling factor	GABRA4	gamma-aminobutyric acid type A receptor alpha4 subunit
CRADD	CASP2 and RIPK1 domain containing adaptor with death domain									ANOS1	anosmin 1	ASAH2B	N-acylsphingosine amidohydrolase 2B	ASAH2B	N-acylsphingosine amidohydrolase 2B	SLC30A4	solute carrier family 30 member 4			CELF3	CUGBP Elav-like family member 3	NUP107	nucleoporin 107	CFL2	cofilin 2	KDELR2	KDEL endoplasmic reticulum protein retention receptor 2	AKAIN1	A-kinase anchor inhibitor 1			LNX2	ligand of numb-protein X 2			FZD3	frizzled class receptor 3	MAP7D1	MAP7 domain containing 1			MRPS16	mitochondrial ribosomal protein S16	CADM2	cell adhesion molecule 2	KREMEN1	kringle containing transmembrane protein 1	FGFR1	fibroblast growth factor receptor 1
PPP2R5E	protein phosphatase 2 regulatory subunit B'epsilon									DACH1	dachshund family transcription factor 1	IGF2BP2	insulin like growth factor 2 mRNA binding protein 2	IGF2BP2	insulin like growth factor 2 mRNA binding protein 2	EGFR	epidermal growth factor receptor			ZNF562	zinc finger protein 562	PDIK1L	PDLIM1 interacting kinase 1 like	ARRDC4	arrestin domain containing 4	SEC24B	SEC24 homolog B, COPII coat complex component	DROSHA	drosha ribonuclease III			CLOCK	clock circadian regulator			CEP57L1	centrosomal protein 57 like 1	FKBP11	FKBP prolyl isomerase 11			PTCD1	pentatricopeptide repeat domain 1	GOLGA3	golgin A3	RALGAPA2	Ral GTPase activating protein catalytic alpha subunit 2	BMT2	base methyltransferase of 25S rRNA 2 homolog
FBXL5	F-box and leucine rich repeat protein 5									ENTPD3	ectonucleoside triphosphate diphosphohydrolase 3	RXFP3	relaxin family peptide receptor 3	RXFP3	relaxin family peptide receptor 3	RMND1	required for meiotic nuclear division 1 homolog			BTBD7	BTB domain containing 7	CSNK1G1	casein kinase 1 gamma 1	ENTPD7	ectonucleoside triphosphate diphosphohydrolase 7	AIG1	androgen induced 1	PRRX1	paired related homeobox 1			RHAG	Rh associated glycoprotein			TMEM161B	transmembrane protein 161B	RHBDD2	rhomboid domain containing 2			ATP5MF-PTCD1	ATP5MF-PTCD1 readthrough	TRMT2A	tRNA methyltransferase 2 homolog A	KIF18B	kinesin family member 18B	MSANTD3	Myb/SANT DNA binding domain containing 3
HHLA2	HERV-H LTR-associating 2									PUM1	pumilio RNA binding family member 1	WDR4	WD repeat domain 4	WDR4	WD repeat domain 4	SFXN1	sideroflexin 1			PELO	pelota mRNA surveillance and ribosome rescue factor	TRPV3	transient receptor potential cation channel subfamily V member 3	CALD1	caldesmon 1	HPS5	HPS5, biogenesis of lysosomal organelles complex 2 subunit 2	CHP1	calcineurin like EF-hand protein 1			GOLGA7	golgin A7			H2AFV	H2A histone family member V	APOBEC3F	apolipoprotein B mRNA editing enzyme catalytic subunit 3F			ZKSCAN1	zinc finger with KRAB and SCAN domains 1	SPTBN1	spectrin beta, non-erythrocytic 1	SSC4D	scavenger receptor cysteine rich family member with 4 domains	SMIM10L1	small integral membrane protein 10 like 1
NF2	neurofibromin 2									ZNFX1	zinc finger NFX1-type containing 1	EBPL	EBP like	EBPL	EBP like	TMEM164	transmembrane protein 164			MBD3L3	methyl-CpG binding domain protein 3 like 3	PIAS2	protein inhibitor of activated STAT 2	MST1R	macrophage stimulating 1 receptor	CREBRF	CREB3 regulatory factor	CEACAM1	carcinoembryonic antigen related cell adhesion molecule 1			SECISBP2L	SECIS binding protein 2 like			RUSC1	RUN and SH3 domain containing 1	KIF3C	kinesin family member 3C			MBD2	methyl-CpG binding domain protein 2	BTF3L4	basic transcription factor 3 like 4	PCNX4	pecanex 4	TET2	tet methylcytosine dioxygenase 2
ANAPC16	anaphase promoting complex subunit 16									ITGA10	integrin subunit alpha 10	NLRP2B	NLR family pyrin domain containing 2B	NLRP2B	NLR family pyrin domain containing 2B	SOGA1	suppressor of glucose, autophagy associated 1			MBD3L4	methyl-CpG binding domain protein 3 like 4	HEATR1	HEAT repeat containing 1	ERBIN	erbb2 interacting protein	NAALADL2	N-acetylated alpha-linked acidic dipeptidase like 2	UBE2D4	ubiquitin conjugating enzyme E2 D4 (putative)			MIPEP	mitochondrial intermediate peptidase			MCTS1	MCTS1, re-initiation and release factor	SLC48A1	solute carrier family 48 member 1			KCNT2	potassium sodium-activated channel subfamily T member 2	FFAR4	free fatty acid receptor 4	RANBP9	RAN binding protein 9	OGA	O-GlcNAcase
HIPK3	homeodomain interacting protein kinase 3									RHOC	ras homolog family member C	NCBP3	nuclear cap binding subunit 3	NCBP3	nuclear cap binding subunit 3	ZNF483	zinc finger protein 483			MBD3L5	methyl-CpG binding domain protein 3 like 5	FCHO2	FCH domain only 2	SH3BGRL3	SH3 domain binding glutamate rich protein like 3	MEGF11	multiple EGF like domains 11	UGT2B10	UDP glucuronosyltransferase family 2 member B10			DCTN6	dynactin subunit 6			MECP2	methyl-CpG binding protein 2	GPR3	G protein-coupled receptor 3			FLRT1	fibronectin leucine rich transmembrane protein 1	ELAVL2	ELAV like RNA binding protein 2	ZFP28	ZFP28 zinc finger protein	UPRT	uracil phosphoribosyltransferase homolog
PRMT2	protein arginine methyltransferase 2									NPAP1	nuclear pore associated protein 1	DENND6A	DENN domain containing 6A	DENND6A	DENN domain containing 6A	TLR7	toll like receptor 7			MRPL4	mitochondrial ribosomal protein L4	CFDP1	craniofacial development protein 1	RPS6KB1	ribosomal protein S6 kinase B1	KIAA1549	KIAA1549	EMC10	ER membrane protein complex subunit 10			TGIF1	TGFB induced factor homeobox 1			ISPD	isoprenoid synthase domain containing	CYP11B2	cytochrome P450 family 11 subfamily B member 2			MGST1	microsomal glutathione S-transferase 1	KCTD14	potassium channel tetramerization domain containing 14	NOLC1	nucleolar and coiled-body phosphoprotein 1	MYB	MYB proto-oncogene, transcription factor
ZNF285	zinc finger protein 285									TMEM263	transmembrane protein 263	MLXIP	MLX interacting protein	MLXIP	MLX interacting protein	NOP9	NOP9 nucleolar protein			ZNF578	zinc finger protein 578	UHMK1	U2AF homology motif kinase 1	FBXW8	F-box and WD repeat domain containing 8	DTX4	deltex E3 ubiquitin ligase 4	SERPINF2	serpin family F member 2			C9orf72	chromosome 9 open reading frame 72			GCLM	glutamate-cysteine ligase modifier subunit	CHP1	calcineurin like EF-hand protein 1			MANEAL	mannosidase endo-alpha like	GEMIN5	gem nuclear organelle associated protein 5	ALDH1L2	aldehyde dehydrogenase 1 family member L2	SMOC1	SPARC related modular calcium binding 1
PERM1	PPARGC1 and ESRR induced regulator, muscle 1									ST14	suppression of tumorigenicity 14	2011-09-01	septin 11	2011-09-01	septin 11	LOC388436	uncharacterized protein ENSP00000382042			FAM122A	family with sequence similarity 122A	XRCC5	X-ray repair cross complementing 5	ZNF98	zinc finger protein 98	NR1I2	nuclear receptor subfamily 1 group I member 2	FGD2	FYVE, RhoGEF and PH domain containing 2			TRIL	TLR4 interactor with leucine rich repeats			DTWD2	DTW domain containing 2	NPPC	natriuretic peptide C			ERI1	exoribonuclease 1	CUL3	cullin 3	POU2F2	POU class 2 homeobox 2	BARD1	BRCA1 associated RING domain 1
ABCC9	ATP binding cassette subfamily C member 9									FEZF2	FEZ family zinc finger 2	KAT6A	lysine acetyltransferase 6A	KAT6A	lysine acetyltransferase 6A	LOC79999	uncharacterized protein ENSP00000382033			RC3H1	ring finger and CCCH-type domains 1	SEMA4D	semaphorin 4D	FBXO11	F-box protein 11	PTPN3	protein tyrosine phosphatase, non-receptor type 3	SNCA	synuclein alpha			DYNC1LI2	dynein cytoplasmic 1 light intermediate chain 2			PTGER4	prostaglandin E receptor 4	MBOAT7	membrane bound O-acyltransferase domain containing 7			CAPN15	calpain 15	SIKE1	suppressor of IKBKE 1	ZFYVE27	zinc finger FYVE-type containing 27	FKTN	fukutin
CGGBP1	CGG triplet repeat binding protein 1									RAB27A	RAB27A, member RAS oncogene family	ZMYND11	zinc finger MYND-type containing 11	ZMYND11	zinc finger MYND-type containing 11	NOS1	nitric oxide synthase 1			SAP130	Sin3A associated protein 130	CYP20A1	cytochrome P450 family 20 subfamily A member 1	PPEF2	protein phosphatase with EF-hand domain 2	VSIG4	V-set and immunoglobulin domain containing 4	GSK3A	glycogen synthase kinase 3 alpha			KIAA0586	KIAA0586			TAF4	TATA-box binding protein associated factor 4	E2F3	E2F transcription factor 3			EFNA2	ephrin A2	GRWD1	glutamate rich WD repeat containing 1	HTN3	histatin 3	ATF6	activating transcription factor 6
GP2	glycoprotein 2									ATG10	autophagy related 10	FANCE	FA complementation group E	FANCE	FA complementation group E	2003-09-01	septin 3			PPIL2	peptidylprolyl isomerase like 2	TINAG	tubulointerstitial nephritis antigen	PHF2	PHD finger protein 2	UBE2QL1	ubiquitin conjugating enzyme E2 Q family like 1	CBX5	chromobox 5			COBL	cordon-bleu WH2 repeat protein			CA8	carbonic anhydrase 8	DCAF7	DDB1 and CUL4 associated factor 7			ZNF624	zinc finger protein 624	AFDN	afadin, adherens junction formation factor	C1orf105	chromosome 1 open reading frame 105	SYCP2L	synaptonemal complex protein 2 like
SALL4	spalt like transcription factor 4									SORCS2	sortilin related VPS10 domain containing receptor 2	TRAF5	TNF receptor associated factor 5	TRAF5	TNF receptor associated factor 5	ATXN1L	ataxin 1 like			CLEC6A	C-type lectin domain containing 6A	ZRANB2	zinc finger RANBP2-type containing 2	PDZD8	PDZ domain containing 8	PCDH7	protocadherin 7	E2F3	E2F transcription factor 3			DUSP2	dual specificity phosphatase 2			STAM	signal transducing adaptor molecule	AKAIN1	A-kinase anchor inhibitor 1			NSD2	nuclear receptor binding SET domain protein 2	CA5B	carbonic anhydrase 5B	PLXNA4	plexin A4	SSR3	signal sequence receptor subunit 3
ZNF850	zinc finger protein 850									STXBP5	syntaxin binding protein 5	EN2	engrailed homeobox 2	EN2	engrailed homeobox 2	ZNF513	zinc finger protein 513			TOR1AIP1	torsin 1A interacting protein 1	PLD1	phospholipase D1	FHIT	fragile histidine triad	SCN9A	sodium voltage-gated channel alpha subunit 9	PPARA	peroxisome proliferator activated receptor alpha			NUP58	nucleoporin 58			NOD1	nucleotide binding oligomerization domain containing 1	GJC1	gap junction protein gamma 1			RBM46	RNA binding motif protein 46	ZKSCAN8	zinc finger with KRAB and SCAN domains 8	PDE6A	phosphodiesterase 6A	HIVEP3	human immunodeficiency virus type I enhancer binding protein 3
TMX4	thioredoxin related transmembrane protein 4									CCDC68	coiled-coil domain containing 68	YIPF5	Yip1 domain family member 5	YIPF5	Yip1 domain family member 5	CLN8	CLN8, transmembrane ER and ERGIC protein			FUT9	fucosyltransferase 9	COX18	cytochrome c oxidase assembly factor COX18	SP100	SP100 nuclear antigen	FBXO33	F-box protein 33	PDCD11	programmed cell death 11			RGS7BP	regulator of G protein signaling 7 binding protein			SMIM17	small integral membrane protein 17	DROSHA	drosha ribonuclease III			IPO9	importin 9	SLMAP	sarcolemma associated protein	IGF2R	insulin like growth factor 2 receptor	LSM8	LSM8 homolog, U6 small nuclear RNA associated
CACNG8	calcium voltage-gated channel auxiliary subunit gamma 8									DCP1A	decapping mRNA 1A	TRIM67	tripartite motif containing 67	TRIM67	tripartite motif containing 67	SPHKAP	SPHK1 interactor, AKAP domain containing			CWC27	CWC27 spliceosome associated protein homolog	DCUN1D1	defective in cullin neddylation 1 domain containing 1	NAB1	NGFI-A binding protein 1	ZNF253	zinc finger protein 253	MCTP1	multiple C2 and transmembrane domain containing 1			ZNF420	zinc finger protein 420			ZNF626	zinc finger protein 626	SARM1	sterile alpha and TIR motif containing 1			RPL7L1	ribosomal protein L7 like 1	RPAP3	RNA polymerase II associated protein 3	POU2F3	POU class 2 homeobox 3	GPR1	G protein-coupled receptor 1
GJC1	gap junction protein gamma 1									CCND3	cyclin D3	SLC50A1	solute carrier family 50 member 1	SLC50A1	solute carrier family 50 member 1	GTDC1	glycosyltransferase like domain containing 1			PTTG1IP	PTTG1 interacting protein	CHIC1	cysteine rich hydrophobic domain 1	ZC3H6	zinc finger CCCH-type containing 6	CRK	CRK proto-oncogene, adaptor protein	LCE1A	late cornified envelope 1A			TAGAP	T cell activation RhoGTPase activating protein			TMEM35A	transmembrane protein 35A	PRRX1	paired related homeobox 1			SLC35E1	solute carrier family 35 member E1	GABPA	GA binding protein transcription factor subunit alpha	ADAMTS5	ADAM metallopeptidase with thrombospondin type 1 motif 5	PRDM1	PR/SET domain 1
KLF8	Kruppel like factor 8									MFSD13A	major facilitator superfamily domain containing 13A	PCMTD1	protein-L-isoaspartate (D-aspartate) O-methyltransferase domain containing 1	PCMTD1	protein-L-isoaspartate (D-aspartate) O-methyltransferase domain containing 1	ZER1	zyg-11 related cell cycle regulator			HAS2	hyaluronan synthase 2	SP3	Sp3 transcription factor	MFSD9	major facilitator superfamily domain containing 9	NUS1	NUS1, dehydrodolichyl diphosphate synthase subunit	PPP3R1	protein phosphatase 3 regulatory subunit B, alpha			GLIPR2	GLI pathogenesis related 2			TRIM33	tripartite motif containing 33	TIMP2	TIMP metallopeptidase inhibitor 2			PPP1R3E	protein phosphatase 1 regulatory subunit 3E	ZNF713	zinc finger protein 713	APOOL	apolipoprotein O like	SMC5	structural maintenance of chromosomes 5
ZDHHC3	zinc finger DHHC-type containing 3									INA	internexin neuronal intermediate filament protein alpha	ZNF282	zinc finger protein 282	ZNF282	zinc finger protein 282	SKI	SKI proto-oncogene			LARP6	La ribonucleoprotein domain family member 6	PTP4A1	protein tyrosine phosphatase type IVA, member 1	RAB30	RAB30, member RAS oncogene family	ATXN2	ataxin 2	BSG	basigin (Ok blood group)			DAZAP2	DAZ associated protein 2			CCDC50	coiled-coil domain containing 50	UBE2D4	ubiquitin conjugating enzyme E2 D4 (putative)			TMF1	TATA element modulatory factor 1	SHE	Src homology 2 domain containing E	SCAF4	SR-related CTD associated factor 4	JAGN1	jagunal homolog 1
ABHD17A	abhydrolase domain containing 17A									DPY19L2	dpy-19 like 2	TCF3	transcription factor 3	TCF3	transcription factor 3	SORCS1	sortilin related VPS10 domain containing receptor 1			SPATA6L	spermatogenesis associated 6 like	HTR4	5-hydroxytryptamine receptor 4	KLF11	Kruppel like factor 11	RASD1	ras related dexamethasone induced 1	ETNK2	ethanolamine kinase 2			NTRK2	neurotrophic receptor tyrosine kinase 2			STK26	serine/threonine kinase 26	FGD2	FYVE, RhoGEF and PH domain containing 2			ZNF396	zinc finger protein 396	TGFB2	transforming growth factor beta 2	ATRN	attractin	ZFP82	ZFP82 zinc finger protein
ZNF880	zinc finger protein 880									GPATCH2L	G-patch domain containing 2 like	MYO15B	myosin XVB	MYO15B	myosin XVB	NMUR1	neuromedin U receptor 1			LOC101928841	collagen alpha-1(II) chain-like	BDNF	brain derived neurotrophic factor	ZNF106	zinc finger protein 106	DCTN4	dynactin subunit 4	TSTD2	thiosulfate sulfurtransferase like domain containing 2			POU3F1	POU class 3 homeobox 1			GABPA	GA binding protein transcription factor subunit alpha	UGT2B10	UDP glucuronosyltransferase family 2 member B10			C9orf40	chromosome 9 open reading frame 40	PPTC7	PTC7 protein phosphatase homolog	PDSS2	decaprenyl diphosphate synthase subunit 2	ZIK1	zinc finger protein interacting with K protein 1
RPS23	ribosomal protein S23									BAG4	BCL2 associated athanogene 4	PDLIM1	PDZ and LIM domain 1	PDLIM1	PDZ and LIM domain 1	BICD2	BICD cargo adaptor 2			ZNF302	zinc finger protein 302	WDR12	WD repeat domain 12	LRTOMT	leucine rich transmembrane and O-methyltransferase domain containing	LPP	LIM domain containing preferred translocation partner in lipoma	MICAL2	microtubule associated monooxygenase, calponin and LIM domain containing 2			PTPRJ	protein tyrosine phosphatase, receptor type J			BBS12	Bardet-Biedl syndrome 12	PACRGL	parkin coregulated like			SRPX	sushi repeat containing protein X-linked	SOCS5	suppressor of cytokine signaling 5	MRPL17	mitochondrial ribosomal protein L17	ABCD3	ATP binding cassette subfamily D member 3
CCSER2	coiled-coil serine rich protein 2									PSD2	pleckstrin and Sec7 domain containing 2	FHIT	fragile histidine triad	FHIT	fragile histidine triad	RAPSN	receptor associated protein of the synapse			CDK13	cyclin dependent kinase 13	MAP3K2	mitogen-activated protein kinase kinase kinase 2	MCOLN3	mucolipin 3	CHL1	cell adhesion molecule L1 like	SRRM4	serine/arginine repetitive matrix 4			ARFIP1	ADP ribosylation factor interacting protein 1			SRSF5	serine and arginine rich splicing factor 5	MEF2D	myocyte enhancer factor 2D			RAB11FIP2	RAB11 family interacting protein 2	MXRA7	matrix remodeling associated 7	SPRED1	sprouty related EVH1 domain containing 1	PNISR	PNN interacting serine and arginine rich protein
PTPRK	protein tyrosine phosphatase, receptor type K									CDC5L	cell division cycle 5 like	DAAM2	dishevelled associated activator of morphogenesis 2	DAAM2	dishevelled associated activator of morphogenesis 2	GABARAPL1	GABA type A receptor associated protein like 1			ADAM18	ADAM metallopeptidase domain 18	TWSG1	twisted gastrulation BMP signaling modulator 1	PTCHD4	patched domain containing 4	KCNA1	potassium voltage-gated channel subfamily A member 1	PEX5	peroxisomal biogenesis factor 5			ZFAND4	zinc finger AN1-type containing 4			FAM3C	family with sequence similarity 3 member C	EFCAB2	EF-hand calcium binding domain 2			ITCH	itchy E3 ubiquitin protein ligase	UBE2K	ubiquitin conjugating enzyme E2 K	DPPA4	developmental pluripotency associated 4	PKP4	plakophilin 4
SELE	selectin E									AFAP1L1	actin filament associated protein 1 like 1	VSIR	V-set immunoregulatory receptor	VSIR	V-set immunoregulatory receptor	UBE2QL1	ubiquitin conjugating enzyme E2 Q family like 1			AKR7A2	aldo-keto reductase family 7 member A2	BARHL1	BarH like homeobox 1	EPB41L5	erythrocyte membrane protein band 4.1 like 5	RASGRP1	RAS guanyl releasing protein 1	SARM1	sterile alpha and TIR motif containing 1			CEP85	centrosomal protein 85			USP49	ubiquitin specific peptidase 49	EMC10	ER membrane protein complex subunit 10			DNPEP	aspartyl aminopeptidase	SLC35F2	solute carrier family 35 member F2	NFASC	neurofascin	CDKL5	cyclin dependent kinase like 5
USP4	ubiquitin specific peptidase 4									CASTOR2	cytosolic arginine sensor for mTORC1 subunit 2	ZFPM2	zinc finger protein, FOG family member 2	ZFPM2	zinc finger protein, FOG family member 2	SHB	SH2 domain containing adaptor protein B			RBM48	RNA binding motif protein 48	E2F2	E2F transcription factor 2	FNDC9	fibronectin type III domain containing 9	GRIP2	glutamate receptor interacting protein 2	OLFML2A	olfactomedin like 2A			FILIP1L	filamin A interacting protein 1 like			TASOR	transcription activation suppressor	TEAD3	TEA domain transcription factor 3			MTMR12	myotubularin related protein 12	METTL17	methyltransferase like 17	CAMK4	calcium/calmodulin dependent protein kinase IV	SLC9A7	solute carrier family 9 member A7
FANCA	FA complementation group A									PDE7B	phosphodiesterase 7B	ARRB1	arrestin beta 1	ARRB1	arrestin beta 1	MEX3C	mex-3 RNA binding family member C			NHLRC2	NHL repeat containing 2	FAM76B	family with sequence similarity 76 member B	FAN1	FANCD2 and FANCI associated nuclease 1	FZD7	frizzled class receptor 7	APOBEC3F	apolipoprotein B mRNA editing enzyme catalytic subunit 3F			CBFB	core-binding factor subunit beta			DLEU7	deleted in lymphocytic leukemia 7	SNCA	synuclein alpha			HPCAL4	hippocalcin like 4	ZBTB34	zinc finger and BTB domain containing 34	MAGEE2	MAGE family member E2	UGCG	UDP-glucose ceramide glucosyltransferase
RPS6KA5	ribosomal protein S6 kinase A5									IER5L	immediate early response 5 like	SP100	SP100 nuclear antigen	SP100	SP100 nuclear antigen	HOOK3	hook microtubule tethering protein 3			CD96	CD96 molecule	PTPN3	protein tyrosine phosphatase, non-receptor type 3	SLC15A2	solute carrier family 15 member 2	TRDMT1	tRNA aspartic acid methyltransferase 1	WBP2	WW domain binding protein 2			MEX3C	mex-3 RNA binding family member C			IYD	iodotyrosine deiodinase	TULP4	tubby like protein 4			ZNF37A	zinc finger protein 37A	HNRNPLL	heterogeneous nuclear ribonucleoprotein L like	PACS2	phosphofurin acidic cluster sorting protein 2	MRTFB	myocardin related transcription factor B
EFCAB2	EF-hand calcium binding domain 2									UBE2H	ubiquitin conjugating enzyme E2 H	CSTA	cystatin A	CSTA	cystatin A	TMEM123	transmembrane protein 123			ZNF470	zinc finger protein 470	EXPH5	exophilin 5	CEP128	centrosomal protein 128	RFWD3	ring finger and WD repeat domain 3	CSNK2A1	casein kinase 2 alpha 1			PTP4A1	protein tyrosine phosphatase type IVA, member 1			C1D	C1D nuclear receptor corepressor	CBX5	chromobox 5			FAXC	failed axon connections homolog	GRIA2	glutamate ionotropic receptor AMPA type subunit 2	BRAP	BRCA1 associated protein	ALG10B	ALG10B, alpha-1,2-glucosyltransferase
LPGAT1	lysophosphatidylglycerol acyltransferase 1									RNF144A	ring finger protein 144A	PTK6	protein tyrosine kinase 6	PTK6	protein tyrosine kinase 6	TPM3	tropomyosin 3			NEBL	nebulette	RMND5A	required for meiotic nuclear division 5 homolog A	TMEM231	transmembrane protein 231	COL19A1	collagen type XIX alpha 1 chain	TULP4	tubby like protein 4			PCDHA10	protocadherin alpha 10			DQX1	DEAQ-box RNA dependent ATPase 1	GSK3A	glycogen synthase kinase 3 alpha			PNPLA1	patatin like phospholipase domain containing 1	PAPOLG	poly(A) polymerase gamma	ZNF592	zinc finger protein 592	GGACT	gamma-glutamylamine cyclotransferase
HAVCR2	hepatitis A virus cellular receptor 2									RO60	Ro60, Y RNA binding protein	RNASEH2C	ribonuclease H2 subunit C	RNASEH2C	ribonuclease H2 subunit C	CRTC3	CREB regulated transcription coactivator 3			RTN4RL1	reticulon 4 receptor like 1	ZBTB39	zinc finger and BTB domain containing 39	ODF2L	outer dense fiber of sperm tails 2 like	GLIS3	GLIS family zinc finger 3	BAZ2A	bromodomain adjacent to zinc finger domain 2A			PCDHA9	protocadherin alpha 9			LRRC40	leucine rich repeat containing 40	SRRM4	serine/arginine repetitive matrix 4			ABHD18	abhydrolase domain containing 18	PRKAA2	protein kinase AMP-activated catalytic subunit alpha 2	ARL8A	ADP ribosylation factor like GTPase 8A	PPP1CB	protein phosphatase 1 catalytic subunit beta
MPPED2	metallophosphoesterase domain containing 2									POPDC2	popeye domain containing 2	LRRTM4	leucine rich repeat transmembrane neuronal 4	LRRTM4	leucine rich repeat transmembrane neuronal 4	ZCCHC17	zinc finger CCHC-type containing 17			KDELC2	KDEL motif containing 2	PBRM1	polybromo 1	CRYGN	crystallin gamma N	HBD	hemoglobin subunit delta	NOTCH2	notch 2			PCDHA6	protocadherin alpha 6			ARL1	ADP ribosylation factor like GTPase 1	ZNF850	zinc finger protein 850			F2R	coagulation factor II thrombin receptor	ZFHX3	zinc finger homeobox 3	CRTC1	CREB regulated transcription coactivator 1	TCF15	transcription factor 15
ROBO2	roundabout guidance receptor 2									ZNF34	zinc finger protein 34	SORCS2	sortilin related VPS10 domain containing receptor 2	SORCS2	sortilin related VPS10 domain containing receptor 2	SYDE2	synapse defective Rho GTPase homolog 2			ZNF441	zinc finger protein 441	PCMTD2	protein-L-isoaspartate (D-aspartate) O-methyltransferase domain containing 2	CLDN22	claudin 22	PIAS2	protein inhibitor of activated STAT 2	TMEM74	transmembrane protein 74			PCDHA1	protocadherin alpha 1			RAB6D	RAB6D, member RAS oncogene family	PDCD11	programmed cell death 11			BBIP1	BBSome interacting protein 1	GTF2H3	general transcription factor IIH subunit 3	NEURL1	neuralized E3 ubiquitin protein ligase 1	ITGA8	integrin subunit alpha 8
TRA2B	transformer 2 beta homolog									SHISA9	shisa family member 9	ZNF37A	zinc finger protein 37A	ZNF37A	zinc finger protein 37A	TOR1AIP2	torsin 1A interacting protein 2			DENND5B	DENN domain containing 5B	RPS6KA6	ribosomal protein S6 kinase A6	STXBP5	syntaxin binding protein 5	TMEM39A	transmembrane protein 39A	SUPT16H	SPT16 homolog, facilitates chromatin remodeling subunit			PCDHA8	protocadherin alpha 8			SOWAHC	sosondowah ankyrin repeat domain family member C	MCTP1	multiple C2 and transmembrane domain containing 1			MS4A3	membrane spanning 4-domains A3	GRSF1	G-rich RNA sequence binding factor 1	SLC29A3	solute carrier family 29 member 3	COL25A1	collagen type XXV alpha 1 chain
ITGA3	integrin subunit alpha 3									CCAR2	cell cycle and apoptosis regulator 2	ANKS6	ankyrin repeat and sterile alpha motif domain containing 6	ANKS6	ankyrin repeat and sterile alpha motif domain containing 6	IFITM10	interferon induced transmembrane protein 10			NPEPPS	aminopeptidase puromycin sensitive	H2BFM	H2B histone family member M	RWDD2A	RWD domain containing 2A	PCGF5	polycomb group ring finger 5	LYG1	lysozyme g1			PCDHA7	protocadherin alpha 7			ATP2C1	ATPase secretory pathway Ca2+ transporting 1	LCE1A	late cornified envelope 1A			GPR173	G protein-coupled receptor 173	TOMM22	translocase of outer mitochondrial membrane 22	GOLGA7B	golgin A7 family member B	ZPLD1	zona pellucida like domain containing 1
SYNPO2	synaptopodin 2									MFAP3	microfibril associated protein 3	HTRA2	HtrA serine peptidase 2	HTRA2	HtrA serine peptidase 2	GANC	glucosidase alpha, neutral C			ABCC5	ATP binding cassette subfamily C member 5	TENT4B	terminal nucleotidyltransferase 4B	AGGF1	angiogenic factor with G-patch and FHA domains 1	FERMT2	fermitin family member 2	ZNF773	zinc finger protein 773			PCDHA5	protocadherin alpha 5			CYP4X1	cytochrome P450 family 4 subfamily X member 1	CD3EAP	CD3e molecule associated protein			PRKCI	protein kinase C iota	LACTB	lactamase beta	CBL	Cbl proto-oncogene	CA8	carbonic anhydrase 8
NNT	nicotinamide nucleotide transhydrogenase									PTGER3	prostaglandin E receptor 3	MXD1	MAX dimerization protein 1	MXD1	MAX dimerization protein 1	ATXN7L2	ataxin 7 like 2			SCLT1	sodium channel and clathrin linker 1	SLC4A10	solute carrier family 4 member 10	DYNC2LI1	dynein cytoplasmic 2 light intermediate chain 1	CDY1	chromodomain Y-linked 1	PEX11B	peroxisomal biogenesis factor 11 beta			PCDHA4	protocadherin alpha 4			PABPC4L	poly(A) binding protein cytoplasmic 4 like	PPP3R1	protein phosphatase 3 regulatory subunit B, alpha			CAST	calpastatin	AFF4	AF4/FMR2 family member 4	GPC6	glypican 6	RTN4IP1	reticulon 4 interacting protein 1
CD274	CD274 molecule									ZNF366	zinc finger protein 366	UBE2V1	ubiquitin conjugating enzyme E2 V1	UBE2V1	ubiquitin conjugating enzyme E2 V1	NCMAP	non-compact myelin associated protein			SLC45A4	solute carrier family 45 member 4	PRPF4	pre-mRNA processing factor 4	ST8SIA3	ST8 alpha-N-acetyl-neuraminide alpha-2,8-sialyltransferase 3	CDY1B	chromodomain Y-linked 1B	PCGF3	polycomb group ring finger 3			PCDHA3	protocadherin alpha 3			PRDM6	PR/SET domain 6	BSG	basigin (Ok blood group)			SIM2	SIM bHLH transcription factor 2	LDAH	lipid droplet associated hydrolase	PARP8	poly(ADP-ribose) polymerase family member 8	ERP44	endoplasmic reticulum protein 44
TPD52L3	TPD52 like 3									TJP2	tight junction protein 2	ZNF510	zinc finger protein 510	ZNF510	zinc finger protein 510	SPTSSA	serine palmitoyltransferase small subunit A			ZNF705A	zinc finger protein 705A	EIF2S1	eukaryotic translation initiation factor 2 subunit alpha	GPR161	G protein-coupled receptor 161	PLAA	phospholipase A2 activating protein	EFCAB2	EF-hand calcium binding domain 2			PCDHA2	protocadherin alpha 2			NKIRAS2	NFKB inhibitor interacting Ras like 2	TSTD2	thiosulfate sulfurtransferase like domain containing 2			PIKFYVE	phosphoinositide kinase, FYVE-type zinc finger containing	TRIM36	tripartite motif containing 36	TMEM26	transmembrane protein 26	RBM38	RNA binding motif protein 38
HYKK	hydroxylysine kinase									RAD51B	RAD51 paralog B	ZBTB44	zinc finger and BTB domain containing 44	ZBTB44	zinc finger and BTB domain containing 44	SLC1A7	solute carrier family 1 member 7			HTN3	histatin 3	COL25A1	collagen type XXV alpha 1 chain	HECA	hdc homolog, cell cycle regulator	THSD7B	thrombospondin type 1 domain containing 7B	ALDH16A1	aldehyde dehydrogenase 16 family member A1			PCDHA13	protocadherin alpha 13			RNF128	ring finger protein 128, E3 ubiquitin protein ligase	PEX5	peroxisomal biogenesis factor 5			VPS29	VPS29, retromer complex component	UBXN2B	UBX domain protein 2B	STAT6	signal transducer and activator of transcription 6	CHST15	carbohydrate sulfotransferase 15
PRKAR2B	protein kinase cAMP-dependent type II regulatory subunit beta									CBX2	chromobox 2	ARMCX2	armadillo repeat containing X-linked 2	ARMCX2	armadillo repeat containing X-linked 2	HIF1AN	hypoxia inducible factor 1 subunit alpha inhibitor			APOH	apolipoprotein H	ZNF148	zinc finger protein 148	SLC4A8	solute carrier family 4 member 8	LCE1B	late cornified envelope 1B	ADCYAP1R1	ADCYAP receptor type I			PCDHA12	protocadherin alpha 12			CALD1	caldesmon 1	OLFML2A	olfactomedin like 2A			TMEM199	transmembrane protein 199	AGBL4	ATP/GTP binding protein like 4	DMAC2L	distal membrane arm assembly complex 2 like	DYRK1A	dual specificity tyrosine phosphorylation regulated kinase 1A
RPS3	ribosomal protein S3									KBTBD4	kelch repeat and BTB domain containing 4	DCAF10	DDB1 and CUL4 associated factor 10	DCAF10	DDB1 and CUL4 associated factor 10	ZNF850	zinc finger protein 850					SORBS2	sorbin and SH3 domain containing 2	METTL9	methyltransferase like 9	CCPG1	cell cycle progression 1	CEBPZOS	CEBPZ opposite strand			PCDHA11	protocadherin alpha 11			CEP44	centrosomal protein 44	TMEM74	transmembrane protein 74			CASK	calcium/calmodulin dependent serine protein kinase	FBXO38	F-box protein 38	CCDC155	coiled-coil domain containing 155	YTHDC2	YTH domain containing 2
GABPA	GA binding protein transcription factor subunit alpha									RPL34	ribosomal protein L34	ING1	inhibitor of growth family member 1	ING1	inhibitor of growth family member 1	CDC5L	cell division cycle 5 like					NRG1	neuregulin 1	ENPP6	ectonucleotide pyrophosphatase/phosphodiesterase 6	CLCC1	chloride channel CLIC like 1	ZNF850	zinc finger protein 850			PCDHAC2	protocadherin alpha subfamily C, 2			KANSL3	KAT8 regulatory NSL complex subunit 3	PPARA	peroxisome proliferator activated receptor alpha			GIMAP4	GTPase, IMAP family member 4	HAUS5	HAUS augmin like complex subunit 5	TMEM178B	transmembrane protein 178B	FKBP5	FKBP prolyl isomerase 5
CADPS2	calcium dependent secretion activator 2									ZNF99	zinc finger protein 99	SOX13	SRY-box 13	SOX13	SRY-box 13	UTP15	UTP15, small subunit processome component					BTG1	BTG anti-proliferation factor 1	SLC1A2	solute carrier family 1 member 2	RAB3B	RAB3B, member RAS oncogene family	TXLNG	taxilin gamma			PCDHAC1	protocadherin alpha subfamily C, 1			UBE2I	ubiquitin conjugating enzyme E2 I	ARMH3	armadillo-like helical domain containing 3			SKA1	spindle and kinetochore associated complex subunit 1	MGA	MGA, MAX dimerization protein	CCBE1	collagen and calcium binding EGF domains 1	APAF1	apoptotic peptidase activating factor 1
BMP8A	bone morphogenetic protein 8a									ZNF444	zinc finger protein 444	PDPN	podoplanin	PDPN	podoplanin	PRR11	proline rich 11					KIN	Kin17 DNA and RNA binding protein	BMPR1B	bone morphogenetic protein receptor type 1B	KLF6	Kruppel like factor 6	FRMPD3	FERM and PDZ domain containing 3			PTPN4	protein tyrosine phosphatase, non-receptor type 4			AGFG1	ArfGAP with FG repeats 1	WBP2	WW domain binding protein 2			THAP6	THAP domain containing 6	MLEC	malectin	TPCN2	two pore segment channel 2	LEPROTL1	leptin receptor overlapping transcript like 1
UNC5A	unc-5 netrin receptor A									CDC42SE1	CDC42 small effector 1	STXBP6	syntaxin binding protein 6	STXBP6	syntaxin binding protein 6	TRIM33	tripartite motif containing 33					ZC2HC1B	zinc finger C2HC-type containing 1B	CYP4V2	cytochrome P450 family 4 subfamily V member 2	AVPR1A	arginine vasopressin receptor 1A	SOGA3	SOGA family member 3			LRP1	LDL receptor related protein 1			ITGAV	integrin subunit alpha V	CSNK2A1	casein kinase 2 alpha 1			ESM1	endothelial cell specific molecule 1	NUDT11	nudix hydrolase 11	NRSN2	neurensin 2	KIF3B	kinesin family member 3B
YTHDC2	YTH domain containing 2									TRPS1	transcriptional repressor GATA binding 1	CD109	CD109 molecule	CD109	CD109 molecule	RAB7B	RAB7B, member RAS oncogene family					PELI2	pellino E3 ubiquitin protein ligase family member 2	TMEM239	transmembrane protein 239	FOXG1	forkhead box G1	NXPH3	neurexophilin 3			NAA50	N(alpha)-acetyltransferase 50, NatE catalytic subunit			ZNF507	zinc finger protein 507	HS3ST3B1	heparan sulfate-glucosamine 3-sulfotransferase 3B1			TSC22D1	TSC22 domain family member 1	DSCAML1	DS cell adhesion molecule like 1	QKI	QKI, KH domain containing RNA binding	CHIC1	cysteine rich hydrophobic domain 1
APBB1IP	amyloid beta precursor protein binding family B member 1 interacting protein									RPS6KA1	ribosomal protein S6 kinase A1	FAM122C	family with sequence similarity 122C	FAM122C	family with sequence similarity 122C	VGLL4	vestigial like family member 4					OSBPL10	oxysterol binding protein like 10	SLC16A7	solute carrier family 16 member 7	LRRTM3	leucine rich repeat transmembrane neuronal 3	ARHGAP32	Rho GTPase activating protein 32			USF3	upstream transcription factor family member 3			MFSD8	major facilitator superfamily domain containing 8	CHD9	chromodomain helicase DNA binding protein 9			SLC43A1	solute carrier family 43 member 1	CKS1B	CDC28 protein kinase regulatory subunit 1B	STUM	stum, mechanosensory transduction mediator homolog	ITM2A	integral membrane protein 2A
CDK2	cyclin dependent kinase 2									POM121	POM121 transmembrane nucleoporin	BPNT1	3'(2'), 5'-bisphosphate nucleotidase 1	BPNT1	3'(2'), 5'-bisphosphate nucleotidase 1	GAMT	guanidinoacetate N-methyltransferase					ACSL4	acyl-CoA synthetase long chain family member 4	ZNF492	zinc finger protein 492	DUXA	double homeobox A	NAV3	neuron navigator 3			USP32	ubiquitin specific peptidase 32			GPC6	glypican 6	BAZ2A	bromodomain adjacent to zinc finger domain 2A			MTDH	metadherin	SEMA3A	semaphorin 3A	ELAVL4	ELAV like RNA binding protein 4	MAP2	microtubule associated protein 2
PSD3	pleckstrin and Sec7 domain containing 3									UHRF1BP1	UHRF1 binding protein 1	MFAP3	microfibril associated protein 3	MFAP3	microfibril associated protein 3	GRIA1	glutamate ionotropic receptor AMPA type subunit 1					RAD1	RAD1 checkpoint DNA exonuclease	TAGAP	T cell activation RhoGTPase activating protein	MPEG1	macrophage expressed 1	PLEKHA5	pleckstrin homology domain containing A5			M6PR	mannose-6-phosphate receptor, cation dependent			ATOH8	atonal bHLH transcription factor 8	TSPAN18	tetraspanin 18			OXR1	oxidation resistance 1	DNAL1	dynein axonemal light chain 1	CTSK	cathepsin K	FOXP4	forkhead box P4
SLC20A2	solute carrier family 20 member 2									C2CD2L	C2CD2 like	OPRPN	opiorphin prepropeptide	OPRPN	opiorphin prepropeptide	NAT8L	N-acetyltransferase 8 like					SELENOT	selenoprotein T	FAM210B	family with sequence similarity 210 member B	STK17B	serine/threonine kinase 17b	CLCC1	chloride channel CLIC like 1			MARS2	methionyl-tRNA synthetase 2, mitochondrial			INTS6L	integrator complex subunit 6 like	NOTCH2	notch 2			DCP2	decapping mRNA 2	KIF5C	kinesin family member 5C	LAMB4	laminin subunit beta 4	ALG10	ALG10, alpha-1,2-glucosyltransferase
ARHGEF4	Rho guanine nucleotide exchange factor 4									SHLD2	shieldin complex subunit 2	CHST10	carbohydrate sulfotransferase 10	CHST10	carbohydrate sulfotransferase 10	RNF41	ring finger protein 41					UEVLD	UEV and lactate/malate dehyrogenase domains	DTWD1	DTW domain containing 1	PRDM15	PR/SET domain 15	SLC26A2	solute carrier family 26 member 2			LAMTOR3	late endosomal/lysosomal adaptor, MAPK and MTOR activator 3			LRRC2	leucine rich repeat containing 2	CLEC17A	C-type lectin domain containing 17A			UNC119B	unc-119 lipid binding chaperone B	CBL	Cbl proto-oncogene	SPPL3	signal peptide peptidase like 3	ZRANB1	zinc finger RANBP2-type containing 1
TOP1	DNA topoisomerase I									ZNF385A	zinc finger protein 385A	GPR143	G protein-coupled receptor 143	GPR143	G protein-coupled receptor 143	KIAA1324	KIAA1324					MFSD6	major facilitator superfamily domain containing 6	COMMD4	COMM domain containing 4	UBE2E3	ubiquitin conjugating enzyme E2 E3	ARMH3	armadillo-like helical domain containing 3			ELL2	elongation factor for RNA polymerase II 2			FAM167A	family with sequence similarity 167 member A	SUPT16H	SPT16 homolog, facilitates chromatin remodeling subunit			CAMK1D	calcium/calmodulin dependent protein kinase ID	C1GALT1	core 1 synthase, glycoprotein-N-acetylgalactosamine 3-beta-galactosyltransferase 1	SAP30BP	SAP30 binding protein	USF3	upstream transcription factor family member 3
IBA57	IBA57, iron-sulfur cluster assembly									PASK	PAS domain containing serine/threonine kinase	ADRA2A	adrenoceptor alpha 2A	ADRA2A	adrenoceptor alpha 2A	BTBD10	BTB domain containing 10					SEH1L	SEH1 like nucleoporin	SLIT2	slit guidance ligand 2	KCNJ13	potassium voltage-gated channel subfamily J member 13	PLEKHM3	pleckstrin homology domain containing M3			RBM46	RNA binding motif protein 46			AMMECR1L	AMMECR1 like	LYG1	lysozyme g1			GTF2H3	general transcription factor IIH subunit 3	VAPA	VAMP associated protein A	POPDC2	popeye domain containing 2	DBN1	drebrin 1
SATB2	SATB homeobox 2									VCAN	versican	ZCCHC24	zinc finger CCHC-type containing 24	ZCCHC24	zinc finger CCHC-type containing 24	TMOD2	tropomodulin 2					PAFAH1B1	platelet activating factor acetylhydrolase 1b regulatory subunit 1	SGMS2	sphingomyelin synthase 2	NAP1L4	nucleosome assembly protein 1 like 4	KLF6	Kruppel like factor 6			MCMDC2	minichromosome maintenance domain containing 2			GPR180	G protein-coupled receptor 180	ZNF773	zinc finger protein 773			CLASP2	cytoplasmic linker associated protein 2	SLC30A7	solute carrier family 30 member 7	SUOX	sulfite oxidase	COL22A1	collagen type XXII alpha 1 chain
HIF3A	hypoxia inducible factor 3 subunit alpha									DCUN1D4	defective in cullin neddylation 1 domain containing 4	TRPC7	transient receptor potential cation channel subfamily C member 7	TRPC7	transient receptor potential cation channel subfamily C member 7	SOCS5	suppressor of cytokine signaling 5					CLTC	clathrin heavy chain	GABRA1	gamma-aminobutyric acid type A receptor alpha1 subuni	GSTM3	glutathione S-transferase mu 3	CLTCL1	clathrin heavy chain like 1			MGLL	monoglyceride lipase			KLHL42	kelch like family member 42	PEX11B	peroxisomal biogenesis factor 11 beta			WIPF1	WAS/WASL interacting protein family member 1	CNOT6L	CCR4-NOT transcription complex subunit 6 like	A1CF	APOBEC1 complementation factor	C5orf63	chromosome 5 open reading frame 63
ESCO2	establishment of sister chromatid cohesion N-acetyltransferase 2									AKAIN1	A-kinase anchor inhibitor 1	SNX19	sorting nexin 19	SNX19	sorting nexin 19	OPRM1	opioid receptor mu 1					ZNF215	zinc finger protein 215			ZNF782	zinc finger protein 782	RC3H1	ring finger and CCCH-type domains 1			SH3D19	SH3 domain containing 19			CWC22	CWC22 spliceosome associated protein homolog	NEIL2	nei like DNA glycosylase 2			LETM2	leucine zipper and EF-hand containing transmembrane protein 2	SCAMP1	secretory carrier membrane protein 1	TMEM59L	transmembrane protein 59 like	VMA21	VMA21, vacuolar ATPase assembly factor
KCNE1	potassium voltage-gated channel subfamily E regulatory subunit 1									ORC5	origin recognition complex subunit 5	MFSD4A	major facilitator superfamily domain containing 4A	MFSD4A	major facilitator superfamily domain containing 4A	LRTOMT	leucine rich transmembrane and O-methyltransferase domain containing					PRKCQ	protein kinase C theta			COL2A1	collagen type II alpha 1 chain	SLC36A1	solute carrier family 36 member 1			ZNF704	zinc finger protein 704			OLFM2	olfactomedin 2	PHACTR4	phosphatase and actin regulator 4			ZNF761	zinc finger protein 761	RLIM	ring finger protein, LIM domain interacting	IER5L	immediate early response 5 like	C9orf40	chromosome 9 open reading frame 40
UBQLN1	ubiquilin 1									ATG3	autophagy related 3	SDC3	syndecan 3	SDC3	syndecan 3	TSPAN14	tetraspanin 14					KCNJ3	potassium voltage-gated channel subfamily J member 3			VWA5A	von Willebrand factor A domain containing 5A	PARP11	poly(ADP-ribose) polymerase family member 11			CXXC4	CXXC finger protein 4			PPP1CB	protein phosphatase 1 catalytic subunit beta	PCGF3	polycomb group ring finger 3			PAK3	p21 (RAC1) activated kinase 3	SNX30	sorting nexin family member 30	MAGOHB	mago homolog B, exon junction complex subunit	GPAM	glycerol-3-phosphate acyltransferase, mitochondrial
PRX	periaxin									INHBB	inhibin subunit beta B	TERF2	telomeric repeat binding factor 2	TERF2	telomeric repeat binding factor 2	PARP14	poly(ADP-ribose) polymerase family member 14					YES1	YES proto-oncogene 1, Src family tyrosine kinase			ATP5MC1	ATP synthase membrane subunit c locus 1	ZNF737	zinc finger protein 737			KLHL29	kelch like family member 29			CHM	CHM, Rab escort protein 1	ALDH16A1	aldehyde dehydrogenase 16 family member A1			RBM3	RNA binding motif protein 3	ZNF770	zinc finger protein 770	SPRYD7	SPRY domain containing 7	SELENOT	selenoprotein T
PRIM2	DNA primase subunit 2									ZER1	zyg-11 related cell cycle regulator	MYCN	MYCN proto-oncogene, bHLH transcription factor	MYCN	MYCN proto-oncogene, bHLH transcription factor	IKBKE	inhibitor of nuclear factor kappa B kinase subunit epsilon					GUCY1A2	guanylate cyclase 1 soluble subunit alpha 2			VPS54	VPS54, GARP complex subunit	FUS	FUS RNA binding protein			KLHL8	kelch like family member 8			FAM229B	family with sequence similarity 229 member B	ADCYAP1R1	ADCYAP receptor type I			CALM1	calmodulin 1	NDUFC2-KCTD14	NDUFC2-KCTD14 readthrough	MAP3K21	mitogen-activated protein kinase kinase kinase 21	SOCS6	suppressor of cytokine signaling 6
GPSM2	G protein signaling modulator 2									TCF12	transcription factor 12	MIER2	MIER family member 2	MIER2	MIER family member 2	NRBP2	nuclear receptor binding protein 2					ZNF236	zinc finger protein 236			LMAN1	lectin, mannose binding 1	FBXL17	F-box and leucine rich repeat protein 17			PPTC7	PTC7 protein phosphatase homolog			RAB11FIP2	RAB11 family interacting protein 2	TXLNG	taxilin gamma			CXorf21	chromosome X open reading frame 21	KIF3A	kinesin family member 3A	PHACTR3	phosphatase and actin regulator 3	ZBTB7B	zinc finger and BTB domain containing 7B
SHISA2	shisa family member 2									PAPPA	pappalysin 1	FFAR2	free fatty acid receptor 2	FFAR2	free fatty acid receptor 2	PGRMC1	progesterone receptor membrane component 1					MAP4K4	mitogen-activated protein kinase kinase kinase kinase 4			PIGN	phosphatidylinositol glycan anchor biosynthesis class N	FGF23	fibroblast growth factor 23			HLTF	helicase like transcription factor			NUP43	nucleoporin 43	RC3H1	ring finger and CCCH-type domains 1			GABBR2	gamma-aminobutyric acid type B receptor subunit 2	SPATS2L	spermatogenesis associated serine rich 2 like	MIEF1	mitochondrial elongation factor 1	C9orf170	chromosome 9 open reading frame 170
RORA	RAR related orphan receptor A									GOSR1	golgi SNAP receptor complex member 1	FRMD4A	FERM domain containing 4A	FRMD4A	FERM domain containing 4A	KMT5B	lysine methyltransferase 5B					HSFY1	heat shock transcription factor Y-linked 1			VANGL1	VANGL planar cell polarity protein 1	STUM	stum, mechanosensory transduction mediator homolog			USP46	ubiquitin specific peptidase 46			NFAT5	nuclear factor of activated T cells 5	PLEKHA5	pleckstrin homology domain containing A5			PDE4C	phosphodiesterase 4C	ZNF621	zinc finger protein 621	UBE2H	ubiquitin conjugating enzyme E2 H	TMEM33	transmembrane protein 33
UNKL	unk like zinc finger									ADCYAP1R1	ADCYAP receptor type I	CHST11	carbohydrate sulfotransferase 11	CHST11	carbohydrate sulfotransferase 11	TNRC6B	trinucleotide repeat containing 6B					HSFY2	heat shock transcription factor Y-linked 2			SEMA5A	semaphorin 5A	STX2	syntaxin 2			NR3C1	nuclear receptor subfamily 3 group C member 1			ZNF569	zinc finger protein 569	FRMPD3	FERM and PDZ domain containing 3			GGT6	gamma-glutamyltransferase 6	CRKL	CRK like proto-oncogene, adaptor protein	SPERT	spermatid associated	CCDC59	coiled-coil domain containing 59
HLA-DOA	major histocompatibility complex, class II, DO alpha									FOXP4	forkhead box P4	ENC1	ectodermal-neural cortex 1	ENC1	ectodermal-neural cortex 1	GK5	glycerol kinase 5					RBMS3	RNA binding motif single stranded interacting protein 3			ONECUT2	one cut homeobox 2	LRTOMT	leucine rich transmembrane and O-methyltransferase domain containing			LRRC7	leucine rich repeat containing 7			ZNF780A	zinc finger protein 780A	SOGA3	SOGA family member 3			LRP5	LDL receptor related protein 5	DFFB	DNA fragmentation factor subunit beta	RET	ret proto-oncogene	ABHD17C	abhydrolase domain containing 17C
RAB7B	RAB7B, member RAS oncogene family									CASP14	caspase 14	MS4A2	membrane spanning 4-domains A2	MS4A2	membrane spanning 4-domains A2	ALPK3	alpha kinase 3					GABRB3	gamma-aminobutyric acid type A receptor beta3 subunit			PTK2	protein tyrosine kinase 2	POLI	DNA polymerase iota			ZFX	zinc finger protein X-linked			PTPN2	protein tyrosine phosphatase, non-receptor type 2	ZNF587	zinc finger protein 587			ZNF345	zinc finger protein 345	RCAN2	regulator of calcineurin 2	BLOC1S2	biogenesis of lysosomal organelles complex 1 subunit 2	RPS20	ribosomal protein S20
SMS	spermine synthase									AREL1	apoptosis resistant E3 ubiquitin protein ligase 1	ASXL3	ASXL transcriptional regulator 3	ASXL3	ASXL transcriptional regulator 3	RORA	RAR related orphan receptor A					C18orf54	chromosome 18 open reading frame 54			RHOU	ras homolog family member U	CLEC17A	C-type lectin domain containing 17A			SLC9C1	solute carrier family 9 member C1			PRDM16	PR/SET domain 16	ZNF737	zinc finger protein 737			INAFM2	InaF motif containing 2	CEBPZOS	CEBPZ opposite strand	ADAT2	adenosine deaminase, tRNA specific 2	RIF1	replication timing regulatory factor 1
CD302	CD302 molecule									CNOT9	CCR4-NOT transcription complex subunit 9	POLR1A	RNA polymerase I subunit A	POLR1A	RNA polymerase I subunit A	SEMA4F	ssemaphorin 4F					NAA15	N(alpha)-acetyltransferase 15, NatA auxiliary subunit			ABCG2	ATP binding cassette subfamily G member 2 (Junior blood group)	SLC7A8	solute carrier family 7 member 8			TM6SF1	transmembrane 6 superfamily member 1			PCDH15	protocadherin related 15	ARHGAP32	Rho GTPase activating protein 32			FUT9	fucosyltransferase 9	ZNF320	zinc finger protein 320	CHD9	chromodomain helicase DNA binding protein 9	OPTN	optineurin
LY75-CD302	LY75-CD302 readthrough									ATXN7	ataxin 7	SLC17A7	solute carrier family 17 member 7	SLC17A7	solute carrier family 17 member 7	LRPAP1	LDL receptor related protein associated protein 1					SHOC2	SHOC2, leucine rich repeat scaffold protein			EMB	embigin	PPP4R3A	protein phosphatase 4 regulatory subunit 3A			IVD	isovaleryl-CoA dehydrogenase			ZNF839	zinc finger protein 839	MYH9	myosin heavy chain 9			MAPK10	mitogen-activated protein kinase 10	PRR13	proline rich 13	AMMECR1	Alport syndrome, mental retardation, midface hypoplasia and elliptocytosis chromosomal region gene 1	SRSF10	serine and arginine rich splicing factor 10
TRDMT1	tRNA aspartic acid methyltransferase 1									DPEP2NB	DPEP2 neighbor	SOX12	SRY-box 12	SOX12	SRY-box 12	ZNF546	zinc finger protein 546					TMEM251	transmembrane protein 251			ATXN1L	ataxin 1 like	TBRG1	transforming growth factor beta regulator 1			TBX22	T-box 22			SV2B	synaptic vesicle glycoprotein 2B	PLEKHO2	pleckstrin homology domain containing O2			SMYD4	SET and MYND domain containing 4	RBSN	rabenosyn, RAB effector	MEGF11	multiple EGF like domains 11	MTCL1	microtubule crosslinking factor 1
NIPAL3	NIPA like domain containing 3									SCN8A	sodium voltage-gated channel alpha subunit 8	KCP	kielin cysteine rich BMP regulator	KCP	kielin cysteine rich BMP regulator	WDR82	WD repeat domain 82					HNRNPR	heterogeneous nuclear ribonucleoprotein R			KLHL13	kelch like family member 13	KIAA1671	KIAA1671			CNR1	cannabinoid receptor 1			SPDYE3	speedy/RINGO cell cycle regulator family member E3	SLC26A2	solute carrier family 26 member 2			CCDC162P	coiled-coil domain containing 162, pseudogene	KIDINS220	kinase D interacting substrate 220	IKZF4	IKAROS family zinc finger 4	CDKN2D	cyclin dependent kinase inhibitor 2D
PGS1	phosphatidylglycerophosphate synthase 1									H3F3B	H3 histone family member 3B	ANO6	anoctamin 6	ANO6	anoctamin 6	GID4	GID complex subunit 4 homolog					MAGED2	MAGE family member D2			MTUS2	microtubule associated scaffold protein 2	KCMF1	potassium channel modulatory factor 1			KIAA1549	KIAA1549			2007-03-01	membrane associated ring-CH-type finger 7	NAV3	neuron navigator 3			KHDRBS2	KH RNA binding domain containing, signal transduction associated 2	FAM210A	family with sequence similarity 210 member A	HOXC10	homeobox C10	EBF3	EBF transcription factor 3
SGCD	sarcoglycan delta									TMEM245	transmembrane protein 245	SEMA4C	semaphorin 4C	SEMA4C	semaphorin 4C	MBD1	methyl-CpG binding domain protein 1					KLHL12	kelch like family member 12			AKT3	AKT serine/threonine kinase 3	UAP1L1	UDP-N-acetylglucosamine pyrophosphorylase 1 like 1			ARMCX1	armadillo repeat containing X-linked 1			ZNF226	zinc finger protein 226	FGF23	fibroblast growth factor 23			UBFD1	ubiquitin family domain containing 1	BRI3	brain protein I3	NAV2	neuron navigator 2	EIF5A2	eukaryotic translation initiation factor 5A2
SLC48A1	solute carrier family 48 member 1									RGS21	regulator of G protein signaling 21	PTP4A1	protein tyrosine phosphatase type IVA, member 1	PTP4A1	protein tyrosine phosphatase type IVA, member 1	FZD5	frizzled class receptor 5					EEA1	early endosome antigen 1			GALNT3	polypeptide N-acetylgalactosaminyltransferase 3	TSPAN18	tetraspanin 18			KANK4	KN motif and ankyrin repeat domains 4			BRD1	bromodomain containing 1	TNKS1BP1	tankyrase 1 binding protein 1			HEATR1	HEAT repeat containing 1	APOBEC3D	apolipoprotein B mRNA editing enzyme catalytic subunit 3D	TOM1L2	target of myb1 like 2 membrane trafficking protein	RPS16	ribosomal protein S16
AGBL1	ATP/GTP binding protein like 1									PHOX2A	paired like homeobox 2A	SLC22A23	solute carrier family 22 member 23	SLC22A23	solute carrier family 22 member 23	FAM71F1	family with sequence similarity 71 member F1					UBE3D	ubiquitin protein ligase E3D			AGO3	argonaute RISC catalytic component 3	ORAI2	ORAI calcium release-activated calcium modulator 2			DNAL1	dynein axonemal light chain 1			CUL4B	cullin 4B	CLTCL1	clathrin heavy chain like 1			TNFRSF10D	TNF receptor superfamily member 10d	N4BP2	NEDD4 binding protein 2	FCAMR	Fc fragment of IgA and IgM receptor	SOAT1	sterol O-acyltransferase 1
TSPAN5	tetraspanin 5									KDELR2	KDEL endoplasmic reticulum protein retention receptor 2	SNX20	sorting nexin 20	SNX20	sorting nexin 20	SCD	stearoyl-CoA desaturase					KLHL32	kelch like family member 32			ANKRD37	ankyrin repeat domain 37	ARHGAP9	Rho GTPase activating protein 9			GABPA	GA binding protein transcription factor subunit alpha			NCEH1	neutral cholesterol ester hydrolase 1	ORAI2	ORAI calcium release-activated calcium modulator 2			ZNF667	zinc finger protein 667	LTN1	listerin E3 ubiquitin protein ligase 1	CPS1	carbamoyl-phosphate synthase 1	NUCKS1	nuclear casein kinase and cyclin dependent kinase substrate 1
IRF8	interferon regulatory factor 8									NFAT5	nuclear factor of activated T cells 5	SLC20A1	solute carrier family 20 member 1	SLC20A1	solute carrier family 20 member 1	FKBP5	FKBP prolyl isomerase 5					GRM3	glutamate metabotropic receptor 3			USH1C	USH1 protein network component harmonin	KCNH2	potassium voltage-gated channel subfamily H member 2			AGFG1	ArfGAP with FG repeats 1			SCN8A	sodium voltage-gated channel alpha subunit 8	FUS	FUS RNA binding protein			NDFIP2	Nedd4 family interacting protein 2	TMED5	transmembrane p24 trafficking protein 5	FABP7	fatty acid binding protein 7	FBXL5	F-box and leucine rich repeat protein 5
MYOG	myogenin									JAZF1	JAZF zinc finger 1	STOX2	storkhead box 2	STOX2	storkhead box 2	STEAP2	STEAP2 metalloreductase					RASSF8	Ras association domain family member 8			CSRNP3	cysteine and serine rich nuclear protein 3	CCDC136	coiled-coil domain containing 136			G2E3	G2/M-phase specific E3 ubiquitin protein ligase			ZNF624	zinc finger protein 624	CLCC1	chloride channel CLIC like 1			FXN	frataxin	ERP44	endoplasmic reticulum protein 44	CNN3	calponin 3	DOCK4	dedicator of cytokinesis 4
C18orf25	chromosome 18 open reading frame 25									CCNJ	cyclin J	ST3GAL1	ST3 beta-galactoside alpha-2,3-sialyltransferase 1	ST3GAL1	ST3 beta-galactoside alpha-2,3-sialyltransferase 1	ZNF385A	zinc finger protein 385A					CFAP44	cilia and flagella associated protein 44			SNTB1	syntrophin beta 1	COQ10A	coenzyme Q10A			AEBP2	AE binding protein 2			CHN1	chimerin 1	PLEKHM3	pleckstrin homology domain containing M3			GATAD1	GATA zinc finger domain containing 1	CLSPN	claspin	NPAP1	nuclear pore associated protein 1	YPEL2	yippee like 2
P2RY10	P2Y receptor family member 10									SLC25A36	solute carrier family 25 member 36	SZRD1	SUZ RNA binding domain containing 1	SZRD1	SUZ RNA binding domain containing 1	NOL9	nucleolar protein 9					HIPK3	homeodomain interacting protein kinase 3			ZNF326	zinc finger protein 326	TNRC6B	trinucleotide repeat containing 6B			TAPBP	TAP binding protein			HINT3	histidine triad nucleotide binding protein 3	KLF6	Kruppel like factor 6			VKORC1L1	vitamin K epoxide reductase complex subunit 1 like 1	TNFRSF11B	TNF receptor superfamily member 11b	SLC36A1	solute carrier family 36 member 1	RPL7L1	ribosomal protein L7 like 1
LRTOMT	leucine rich transmembrane and O-methyltransferase domain containing									OR2A4	olfactory receptor family 2 subfamily A member 4	AFF3	AF4/FMR2 family member 3	AFF3	AF4/FMR2 family member 3	ROR1	receptor tyrosine kinase like orphan receptor 1					ZNF780B	zinc finger protein 780B			OPRM1	opioid receptor mu 1	ZYG11B	zyg-11 family member B, cell cycle regulator			SLC2A12	solute carrier family 2 member 12			PAK2	p21 (RAC1) activated kinase 2	POLI	DNA polymerase iota			LONP2	lon peptidase 2, peroxisomal	GNA13	G protein subunit alpha 13	APOBEC3F	apolipoprotein B mRNA editing enzyme catalytic subunit 3F	RAP2A	RAP2A, member of RAS oncogene family
HTR5A	5-hydroxytryptamine receptor 5A									WWC1	WW and C2 domain containing 1	CASP7	caspase 7	CASP7	caspase 7	ERFE	erythroferrone					ZNF208	zinc finger protein 208			EFNA2	ephrin A2	CCSAP	centriole, cilia and spindle associated protein			NEK7	NIMA related kinase 7			DCX	doublecortin	TNRC6B	trinucleotide repeat containing 6B			NLK	nemo like kinase	DEFB129	defensin beta 129	CLSPN	claspin	C12orf66	chromosome 12 open reading frame 66
OSBPL7	oxysterol binding protein like 7									KIR3DL1	killer cell immunoglobulin like receptor, three Ig domains and long cytoplasmic tail 1	CCNYL1	cyclin Y like 1	CCNYL1	cyclin Y like 1	PRND	prion like protein doppel					PTBP2	polypyrimidine tract binding protein 2			CDYL	chromodomain Y like	PMP22	peripheral myelin protein 22			TCP10L	t-complex 10 like			CALML4	calmodulin like 4	TRIM40	tripartite motif containing 40			LINGO1	leucine rich repeat and Ig domain containing 1	FAM76B	family with sequence similarity 76 member B	KCNA6	potassium voltage-gated channel subfamily A member 6	ZNF200	zinc finger protein 200
CAMK1D	calcium/calmodulin dependent protein kinase ID									GOLT1B	golgi transport 1B	OPALIN	oligodendrocytic myelin paranodal and inner loop protein	OPALIN	oligodendrocytic myelin paranodal and inner loop protein	FOXK1	forkhead box K1					UBR1	ubiquitin protein ligase E3 component n-recognin 1			HNRNPAB	heterogeneous nuclear ribonucleoprotein A/B	PLEKHO2	pleckstrin homology domain containing O2			NEXMIF	neurite extension and migration factor			BRPF1	bromodomain and PHD finger containing 1	SLC36A1	solute carrier family 36 member 1			FKBP14	FKBP prolyl isomerase 14	UHMK1	U2AF homology motif kinase 1	BRWD3	bromodomain and WD repeat domain containing 3	COPS7B	COP9 signalosome subunit 7B
RTN4RL1	reticulon 4 receptor like 1									THAP11	THAP domain containing 11	FAM120AOS	family with sequence similarity 120A opposite strand	FAM120AOS	family with sequence similarity 120A opposite strand	YEATS2	YEATS domain containing 2					C1orf94	chromosome 1 open reading frame 94			RMND5A	required for meiotic nuclear division 5 homolog A	EXOC7	exocyst complex component 7			CRY1	cryptochrome circadian regulator 1			HECTD2	HECT domain E3 ubiquitin protein ligase 2	PARP11	poly(ADP-ribose) polymerase family member 11			DGKH	diacylglycerol kinase eta	GCSAML	germinal center associated signaling and motility like	GTF2A1	general transcription factor IIA subunit 1	ZNF470	zinc finger protein 470
ADD1	adducin 1									PTK2	protein tyrosine kinase 2	LHFPL3	LHFPL tetraspan subfamily member 3	LHFPL3	LHFPL tetraspan subfamily member 3	ZNF2	zinc finger protein 2					CNIH4	cornichon family AMPA receptor auxiliary protein 4			NXF1	nuclear RNA export factor 1	CLMN	calmin			JPH1	junctophilin 1			HNRNPK	heterogeneous nuclear ribonucleoprotein K	UAP1L1	UDP-N-acetylglucosamine pyrophosphorylase 1 like 1			MTG1	mitochondrial ribosome associated GTPase 1	ELAVL4	ELAV like RNA binding protein 4	COPZ1	coatomer protein complex subunit zeta 1	TIMM22	translocase of inner mitochondrial membrane 22
TANGO2	transport and golgi organization 2 homolog									NTN1	netrin 1	CCT5	chaperonin containing TCP1 subunit 5	CCT5	chaperonin containing TCP1 subunit 5	PLXNA4	plexin A4					PAG1	phosphoprotein membrane anchor with glycosphingolipid microdomains 1			RAB3IP	RAB3A interacting protein	NPAS3	neuronal PAS domain protein 3			NCAM1	neural cell adhesion molecule 1			NDUFB5	NADH:ubiquinone oxidoreductase subunit B5	KIAA1671	KIAA1671			SFRP1	secreted frizzled related protein 1	SLC6A11	solute carrier family 6 member 11	CGN	cingulin	VSTM4	V-set and transmembrane domain containing 4
NSL1	NSL1, MIS12 kinetochore complex component									RUNX1	runt related transcription factor 1	DAP	death associated protein	DAP	death associated protein	B4GALT1	beta-1,4-galactosyltransferase 1					KLF3	Kruppel like factor 3			CILP	cartilage intermediate layer protein	NDUFB2	NADH:ubiquinone oxidoreductase subunit B2			RIMBP2	RIMS binding protein 2			VSNL1	visinin like 1	FBXL17	F-box and leucine rich repeat protein 17			PANK1	pantothenate kinase 1	FAM114A2	family with sequence similarity 114 member A2	BARD1	BRCA1 associated RING domain 1	ATAD1	ATPase family, AAA domain containing 1
HOOK3	hook microtubule tethering protein 3									APOL4	apolipoprotein L4	NAPG	NSF attachment protein gamma	NAPG	NSF attachment protein gamma	TRPM7	transient receptor potential cation channel subfamily M member 7					GUCY1A1	guanylate cyclase 1 soluble subunit alpha 1			TUBE1	tubulin epsilon 1	MRPL30	mitochondrial ribosomal protein L30			EEA1	early endosome antigen 1			FEM1B	fem-1 homolog B	STUM	stum, mechanosensory transduction mediator homolog			SCN3A	sodium voltage-gated channel alpha subunit 3	ZC3HAV1L	zinc finger CCCH-type containing, antiviral 1 like	ADH6	alcohol dehydrogenase 6 (class V)	SGTB	small glutamine rich tetratricopeptide repeat containing beta
PTCHD1	patched domain containing 1									RAB3GAP1	RAB3 GTPase activating protein catalytic subunit 1	ACTR8	ARP8 actin related protein 8 homolog	ACTR8	ARP8 actin related protein 8 homolog	NOTCH4	notch 4					SPTY2D1	SPT2 chromatin protein domain containing 1			ZNF175	zinc finger protein 175	SH3PXD2A	SH3 and PX domains 2A			MBLAC2	metallo-beta-lactamase domain containing 2			RMI2	RecQ mediated genome instability 2	CYP1A2	cytochrome P450 family 1 subfamily A member 2			RSBN1	round spermatid basic protein 1	GABRG1	gamma-aminobutyric acid type A receptor gamma1 subunit	RCBTB1	RCC1 and BTB domain containing protein 1	CD2AP	CD2 associated protein
SARM1	sterile alpha and TIR motif containing 1									SYT13	synaptotagmin 13	ATP8B3	ATPase phospholipid transporting 8B3	ATP8B3	ATPase phospholipid transporting 8B3	ZNF773	zinc finger protein 773					ONECUT2	one cut homeobox 2			AGFG1	ArfGAP with FG repeats 1	MOB3A	MOB kinase activator 3A			IP6K2	inositol hexakisphosphate kinase 2			TMEM106B	transmembrane protein 106B	F2RL2	coagulation factor II thrombin receptor like 2			CBFA2T3	CBFA2/RUNX1 translocation partner 3	POT1	protection of telomeres 1	INTS6	integrator complex subunit 6	SETD9	SET domain containing 9
TMEM184B	transmembrane protein 184B									PCMTD1	protein-L-isoaspartate (D-aspartate) O-methyltransferase domain containing 1	GIT1	GIT ArfGAP 1	GIT1	GIT ArfGAP 1	NMT2	N-myristoyltransferase 2					MOB1B	MOB kinase activator 1B			TET2	tet methylcytosine dioxygenase 2	MFSD4A	major facilitator superfamily domain containing 4A			PAK2	p21 (RAC1) activated kinase 2			ELK4	ELK4, ETS transcription factor	STX2	syntaxin 2			NR2C2	nuclear receptor subfamily 2 group C member 2	TNFAIP8L1	TNF alpha induced protein 8 like 1	SEC23A	Sec23 homolog A, coat complex II component	MTERF2	mitochondrial transcription termination factor 2
JRKL	JRK like									SLC39A8	solute carrier family 39 member 8	ARGLU1	arginine and glutamate rich 1	ARGLU1	arginine and glutamate rich 1	PLPPR5	phospholipid phosphatase related 5					ELOVL4	ELOVL fatty acid elongase 4			PDS5A	PDS5 cohesin associated factor A	PHACTR4	phosphatase and actin regulator 4			RALGPS2	Ral GEF with PH domain and SH3 binding motif 2			KCNN3	potassium calcium-activated channel subfamily N member 3	LRTOMT	leucine rich transmembrane and O-methyltransferase domain containing			NSL1	NSL1, MIS12 kinetochore complex component	FMO2	flavin containing monooxygenase 2	PLCD4	phospholipase C delta 4	LAT2	linker for activation of T cells family member 2
GPC1	glypican 1									SNX30	sorting nexin family member 30	ATP1A2	ATPase Na+/K+ transporting subunit alpha 2	ATP1A2	ATPase Na+/K+ transporting subunit alpha 2	ZFP36L2	ZFP36 ring finger protein like 2					GHSR	growth hormone secretagogue receptor			EID1	EP300 interacting inhibitor of differentiation 1	HS3ST3B1	heparan sulfate-glucosamine 3-sulfotransferase 3B1			FGF7	fibroblast growth factor 7			RALBP1	ralA binding protein 1	PPP4R3A	protein phosphatase 4 regulatory subunit 3A			AP5B1	adaptor related protein complex 5 subunit beta 1	ZNF678	zinc finger protein 678	USP38	ubiquitin specific peptidase 38	CCNDBP1	cyclin D1 binding protein 1
IKBKB	inhibitor of nuclear factor kappa B kinase subunit beta									CREB5	cAMP responsive element binding protein 5	TM7SF2	transmembrane 7 superfamily member 2	TM7SF2	transmembrane 7 superfamily member 2	CCNB1IP1	cyclin B1 interacting protein 1					KLHL28	kelch like family member 28			EIF3A	eukaryotic translation initiation factor 3 subunit A	TNKS1BP1	tankyrase 1 binding protein 1			PEX2	peroxisomal biogenesis factor 2			SERAC1	serine active site containing 1	ZNF544	zinc finger protein 544			NWD1	NACHT and WD repeat domain containing 1	BTBD1	BTB domain containing 1	CDCA5	cell division cycle associated 5	HTR2C	5-hydroxytryptamine receptor 2C
FAM214B	family with sequence similarity 214 member B									INO80	INO80 complex subunit	PGR	progesterone receptor	PGR	progesterone receptor	RIMKLA	ribosomal modification protein rimK like family member A					MYCL	MYCL proto-oncogene, bHLH transcription factor			FAM89A	family with sequence similarity 89 member A	KDELC2	KDEL motif containing 2			MMP20	matrix metallopeptidase 20			EIF4A1	eukaryotic translation initiation factor 4A1	TBRG1	transforming growth factor beta regulator 1			UBE2G1	ubiquitin conjugating enzyme E2 G1	SOAT1	sterol O-acyltransferase 1	ADCY6	adenylate cyclase 6	TMEM215	transmembrane protein 215
CYP4A22	cytochrome P450 family 4 subfamily A member 22									LMO3	LIM domain only 3	NOVA1	NOVA alternative splicing regulator 1	NOVA1	NOVA alternative splicing regulator 1	MYOZ3	myozenin 3					SAP18	Sin3A associated protein 18			MMP1	matrix metallopeptidase 1	LRRTM4	leucine rich repeat transmembrane neuronal 4			SERINC1	serine incorporator 1			ASXL1	ASXL transcriptional regulator 1	KCMF1	potassium channel modulatory factor 1			ZNF766	zinc finger protein 766	MIP	major intrinsic protein of lens fiber	PBX1	PBX homeobox 1	MTX1	metaxin 1
										HSPA4L	heat shock protein family A (Hsp70) member 4 like	MAPK6	mitogen-activated protein kinase 6	MAPK6	mitogen-activated protein kinase 6	KCNC4	potassium voltage-gated channel subfamily C member 4					NRROS	negative regulator of reactive oxygen species			DIDO1	death inducer-obliterator 1	IL17A	interleukin 17A			THSD7A	thrombospondin type 1 domain containing 7A			SCGB2B2	secretoglobin family 2B member 2	WNT9B	Wnt family member 9B			COL9A3	collagen type IX alpha 3 chain	HUS1	HUS1 checkpoint clamp component	CDC6	cell division cycle 6	SSTR1	somatostatin receptor 1
										JMJD8	jumonji domain containing 8	SFXN2	sideroflexin 2	SFXN2	sideroflexin 2	ARHGAP35	Rho GTPase activating protein 35					USP15	ubiquitin specific peptidase 15			AAK1	AP2 associated kinase 1	CYP1A2	cytochrome P450 family 1 subfamily A member 2			DUSP19	dual specificity phosphatase 19			DMXL1	Dmx like 1	MTFMT	mitochondrial methionyl-tRNA formyltransferase			SSTR2	somatostatin receptor 2	COMMD7	COMM domain containing 7	RIC3	RIC3 acetylcholine receptor chaperone	SLC25A46	solute carrier family 25 member 46
										OPRPN	opiorphin prepropeptide	TMEM167A	transmembrane protein 167A	TMEM167A	transmembrane protein 167A	TRIM13	tripartite motif containing 13					KALRN	kalirin RhoGEF kinase			MBTD1	mbt domain containing 1	CADM3	cell adhesion molecule 3			PLGLB1	plasminogen-like B1			C2orf66	chromosome 2 open reading frame 66	ARHGAP9	Rho GTPase activating protein 9			GPX8	glutathione peroxidase 8 (putative)	TWISTNB	TWIST neighbor	SCG3	secretogranin III	MASP1	mannan binding lectin serine peptidase 1
										CORIN	corin, serine peptidase	TCF4	transcription factor 4	TCF4	transcription factor 4	EVI5	ecotropic viral integration site 5					DOCK10	dedicator of cytokinesis 10			MEGF9	multiple EGF like domains 9	PTPRE	protein tyrosine phosphatase, receptor type E			PLGLB2	plasminogen-like B2			FGD4	FYVE, RhoGEF and PH domain containing 4	KCNH2	potassium voltage-gated channel subfamily H member 2			CDH5	cadherin 5	DCAF12	DDB1 and CUL4 associated factor 12	SLC2A13	solute carrier family 2 member 13	BMPR1B	bone morphogenetic protein receptor type 1B
										KIR2DL1	killer cell immunoglobulin like receptor, two Ig domains and long cytoplasmic tail 1	EPB41	erythrocyte membrane protein band 4.1	EPB41	erythrocyte membrane protein band 4.1	FHDC1	FH2 domain containing 1					IGSF1	immunoglobulin superfamily member 1			TMEM135	transmembrane protein 135	CAMK2A	calcium/calmodulin dependent protein kinase II alpha			MUC13	mucin 13, cell surface associated			DTL	denticleless E3 ubiquitin protein ligase homolog	CCDC136	coiled-coil domain containing 136			VHL	von Hippel-Lindau tumor suppressor	EEF2K	eukaryotic elongation factor 2 kinase	CTIF	cap binding complex dependent translation initiation factor	SEMA6D	semaphorin 6D
										ENAH	ENAH, actin regulator	PXK	PX domain containing serine/threonine kinase like	PXK	PX domain containing serine/threonine kinase like	TSPOAP1	TSPO associated protein 1					TRA2B	transformer 2 beta homolog			ADAM23	ADAM metallopeptidase domain 23	PACS1	phosphofurin acidic cluster sorting protein 1			PRNP	prion protein			PHF20L1	PHD finger protein 20 like 1	COQ10A	coenzyme Q10A			NR2C1	nuclear receptor subfamily 2 group C member 1	KCTD9	potassium channel tetramerization domain containing 9	SERPINB9	serpin family B member 9	WDR43	WD repeat domain 43
										NBR1	NBR1, autophagy cargo receptor	NXF2	nuclear RNA export factor 2	NXF2	nuclear RNA export factor 2	ZNF224	zinc finger protein 224					TMEM38B	transmembrane protein 38B			DNALI1	dynein axonemal light intermediate chain 1	CD3EAP	CD3e molecule associated protein			TEX12	testis expressed 12			AHR	aryl hydrocarbon receptor	ZYG11B	zyg-11 family member B, cell cycle regulator			CABP4	calcium binding protein 4	EPYC	epiphycan	IP6K1	inositol hexakisphosphate kinase 1	ADNP2	ADNP homeobox 2
										KIAA1958	KIAA1958	NXF2B	nuclear RNA export factor 2B	NXF2B	nuclear RNA export factor 2B	C21orf62	chromosome 21 open reading frame 62					ZNF391	zinc finger protein 391			RASSF10	Ras association domain family member 10	XPNPEP3	X-prolyl aminopeptidase 3			PTPN21	protein tyrosine phosphatase, non-receptor type 21			ASTN2	astrotactin 2	CCSAP	centriole, cilia and spindle associated protein			ZNF546	zinc finger protein 546	LPGAT1	lysophosphatidylglycerol acyltransferase 1	CDK16	cyclin dependent kinase 16	TMX4	thioredoxin related transmembrane protein 4
										STMN1	stathmin 1	NTN1	netrin 1	NTN1	netrin 1	TBX1	T-box 1					SNRNP35	small nuclear ribonucleoprotein U11/U12 subunit 35			AMOTL1	angiomotin like 1	OGA	O-GlcNAcase			TTC6	tetratricopeptide repeat domain 6			EBF1	EBF transcription factor 1	SUMF2	sulfatase modifying factor 2			MTPAP	mitochondrial poly(A) polymerase	ZNF578	zinc finger protein 578	TTC5	tetratricopeptide repeat domain 5	BRWD1	bromodomain and WD repeat domain containing 1
										PDGFD	platelet derived growth factor D	PDAP1	PDGFA associated protein 1	PDAP1	PDGFA associated protein 1	SPEN	spen family transcriptional repressor					PTER	phosphotriesterase related			FGB	fibrinogen beta chain	KRT17	keratin 17			PPFIA1	PTPRF interacting protein alpha 1			APOB	apolipoprotein B	SCN8A	sodium voltage-gated channel alpha subunit 8			BSPRY	B-box and SPRY domain containing	FGA	fibrinogen alpha chain	RNF150	ring finger protein 150	CHMP4A	charged multivesicular body protein 4A
										ANO10	anoctamin 10	ZC3H7B	zinc finger CCCH-type containing 7B	ZC3H7B	zinc finger CCCH-type containing 7B	MSI2	musashi RNA binding protein 2					MPZL1	myelin protein zero like 1			PRKAA2	protein kinase AMP-activated catalytic subunit alpha 2	DHX33	DEAH-box helicase 33			AFF3	AF4/FMR2 family member 3			SCAI	suppressor of cancer cell invasion	PMP22	peripheral myelin protein 22			SREK1IP1	SREK1 interacting protein 1	TTC33	tetratricopeptide repeat domain 33	FGFR1OP	FGFR1 oncogene partner	ZBTB39	zinc finger and BTB domain containing 39
										ALDH1L2	aldehyde dehydrogenase 1 family member L2	SOX9	SRY-box 9	SOX9	SRY-box 9	ELMOD1	ELMO domain containing 1					UBE2D1	ubiquitin conjugating enzyme E2 D1			KCNK15	potassium two pore domain channel subfamily K member 15	TNS4	tensin 4			POPDC3	popeye domain containing 3			FAM149A	family with sequence similarity 149 member A	IL36RN	interleukin 36 receptor antagonist			LYRM7	LYR motif containing 7	SHISA9	shisa family member 9	ACP7	acid phosphatase 7, tartrate resistant (putative)	MIPOL1	mirror-image polydactyly 1
										UNC5D	unc-5 netrin receptor D	TP63	tumor protein p63	TP63	tumor protein p63	ABCG4	ATP binding cassette subfamily G member 4					MSR1	macrophage scavenger receptor 1			SLC1A2	solute carrier family 1 member 2	ZNF544	zinc finger protein 544			ALDH6A1	aldehyde dehydrogenase 6 family member A1			OPCML	opioid binding protein/cell adhesion molecule like	XPNPEP3	X-prolyl aminopeptidase 3			SGO2	shugoshin 2	GSR	glutathione-disulfide reductase	PRKAR1A	protein kinase cAMP-dependent type I regulatory subunit alpha	DND1	DND microRNA-mediated repression inhibitor 1
										FKTN	fukutin	FNDC8	fibronectin type III domain containing 8	FNDC8	fibronectin type III domain containing 8	MMP2	matrix metallopeptidase 2					PEG3	paternally expressed 3			PXMP4	peroxisomal membrane protein 4	SLC35E2A	solute carrier family 35 member E2A			ZNF681	zinc finger protein 681			ZNF805	zinc finger protein 805	TEX261	testis expressed 261			ABHD11	abhydrolase domain containing 11	PAGE4	PAGE family member 4	CBX7	chromobox 7	RPL31	ribosomal protein L31
										ANKRD34C	ankyrin repeat domain 34C	UBE2R2	ubiquitin conjugating enzyme E2 R2	UBE2R2	ubiquitin conjugating enzyme E2 R2	LRRFIP1	LRR binding FLII interacting protein 1					NOL7	nucleolar protein 7			DOP1A	DOP1 leucine zipper like protein A	FRAS1	Fraser extracellular matrix complex subunit 1			TM2D3	TM2 domain containing 3			CIPC	CLOCK interacting pacemaker	MOB3A	MOB kinase activator 3A			WDR17	WD repeat domain 17	MRTFB	myocardin related transcription factor B	PSMD9	proteasome 26S subunit, non-ATPase 9	PDE7B	phosphodiesterase 7B
										KIR3DL3	killer cell immunoglobulin like receptor, three Ig domains and long cytoplasmic tail 3	MEGF10	multiple EGF like domains 10	MEGF10	multiple EGF like domains 10	ARPIN-AP3S2	ARPIN-AP3S2 readthrough					WBP2NL	WBP2 N-terminal like			GRIN2A	glutamate ionotropic receptor NMDA type subunit 2A	F2RL2	coagulation factor II thrombin receptor like 2			IRAK3	interleukin 1 receptor associated kinase 3			CNOT7	CCR4-NOT transcription complex subunit 7	EXOC7	exocyst complex component 7			DZIP1	DAZ interacting zinc finger protein 1	SLC28A1	solute carrier family 28 member 1	HS6ST3	heparan sulfate 6-O-sulfotransferase 3	RBM12	RNA binding motif protein 12
										PPARGC1A	PPARG coactivator 1 alpha	HMGXB4	HMG-box containing 4	HMGXB4	HMG-box containing 4	GPR155	G protein-coupled receptor 155					UBN2	ubinuclein 2			CENPN	centromere protein N	RCN3	reticulocalbin 3			FOXN2	forkhead box N2			SRSF12	serine and arginine rich splicing factor 12	NPAS3	neuronal PAS domain protein 3			GRIN2C	glutamate ionotropic receptor NMDA type subunit 2C	STEAP2	STEAP2 metalloreductase	SCAF8	SR-related CTD associated factor 8	KLF12	Kruppel like factor 12
										KDM7A	lysine demethylase 7A	EML1	EMAP like 1	EML1	EMAP like 1	ZNF410	zinc finger protein 410					ST6GAL2	ST6 beta-galactoside alpha-2,6-sialyltransferase 2			MAP2K1	mitogen-activated protein kinase kinase 1	PERP	PERP, TP53 apoptosis effector			ZNF71	zinc finger protein 71			MLLT10	MLLT10, histone lysine methyltransferase DOT1L cofactor	SFXN5	sideroflexin 5			SLC35F5	solute carrier family 35 member F5	CAPN2	calpain 2	ZNF598	zinc finger protein 598	RHO	rhodopsin
										ZNF561	zinc finger protein 561	FBXO41	F-box protein 41	FBXO41	F-box protein 41	ZSCAN29	zinc finger and SCAN domain containing 29					PIBF1	progesterone immunomodulatory binding factor 1			ZNF569	zinc finger protein 569	SUMF2	sulfatase modifying factor 2			IQCH	IQ motif containing H			TFEC	transcription factor EC	NDUFB2	NADH:ubiquinone oxidoreductase subunit B2			MANEA	mannosidase endo-alpha	APBB2	amyloid beta precursor protein binding family B member 2	KCNB1	potassium voltage-gated channel subfamily B member 1	ZNF273	zinc finger protein 273
										GABRR1	gamma-aminobutyric acid type A receptor rho1 subunit	MXD4	MAX dimerization protein 4	MXD4	MAX dimerization protein 4	SPIB	Spi-B transcription factor					TUBA1C	tubulin alpha 1c			TM2D3	TM2 domain containing 3	ZNF578	zinc finger protein 578			FUBP3	far upstream element binding protein 3			PPM1B	protein phosphatase, Mg2+/Mn2+ dependent 1B	CLMN	calmin			WIPI2	WD repeat domain, phosphoinositide interacting 2	FLI1	Fli-1 proto-oncogene, ETS transcription factor	FRMD4A	FERM domain containing 4A	SCARB2	scavenger receptor class B member 2
										WDCP	WD repeat and coiled coil containing	ADGRL1	adhesion G protein-coupled receptor L1	ADGRL1	adhesion G protein-coupled receptor L1	PTCD1	pentatricopeptide repeat domain 1					AKTIP	AKT interacting protein			NECAP2	NECAP endocytosis associated 2	EPSTI1	epithelial stromal interaction 1			ACADSB	acyl-CoA dehydrogenase short/branched chain			KIAA0232	KIAA0232	MFSD4A	major facilitator superfamily domain containing 4A			HAO1	hydroxyacid oxidase 1	OSTF1	osteoclast stimulating factor 1	ZNF655	zinc finger protein 655	HK2	hexokinase 2
										FAM168A	family with sequence similarity 168 member A	DACH1	dachshund family transcription factor 1	DACH1	dachshund family transcription factor 1	ATP5MF-PTCD1	ATP5MF-PTCD1 readthrough					AZI2	5-azacytidine induced 2			RAB22A	RAB22A, member RAS oncogene family	WNT9B	Wnt family member 9B			L3MBTL3	L3MBTL3, histone methyl-lysine binding protein			RFK	riboflavin kinase	SH3PXD2A	SH3 and PX domains 2A			HOXA13	homeobox A13	SLC25A18	solute carrier family 25 member 18	NEUROD2	neuronal differentiation 2	METTL7A	methyltransferase like 7A
										EFCAB14	EF-hand calcium binding domain 14	NAT16	N-acetyltransferase 16 (putative)	NAT16	N-acetyltransferase 16 (putative)	C10orf25	chromosome 10 open reading frame 25					YKT6	YKT6 v-SNARE homolog			ACSM2B	acyl-CoA synthetase medium chain family member 2B	CDC42BPB	CDC42 binding protein kinase beta			TMEM170B	transmembrane protein 170B			KLF12	Kruppel like factor 12	TNS4	tensin 4			RAB2A	RAB2A, member RAS oncogene family	CRIPT	CXXC repeat containing interactor of PDZ3 domain	C5AR2	complement component 5a receptor 2	C8orf87	chromosome 8 open reading frame 87
										SIRT5	sirtuin 5	TNFSF10	TNF superfamily member 10	TNFSF10	TNF superfamily member 10	TMEM132D	transmembrane protein 132D					SCP2	sterol carrier protein 2			ZNF696	zinc finger protein 696	PDPR	pyruvate dehydrogenase phosphatase regulatory subunit			MOB1B	MOB kinase activator 1B			ABCE1	ATP binding cassette subfamily E member 1	SLC35E2A	solute carrier family 35 member E2A			HTATSF1	HIV-1 Tat specific factor 1	PTCHD4	patched domain containing 4	CARMIL1	capping protein regulator and myosin 1 linker 1	MN1	MN1 proto-oncogene, transcriptional regulator
										AHCYL2	adenosylhomocysteinase like 2	PUM1	pumilio RNA binding family member 1	PUM1	pumilio RNA binding family member 1	ZNF326	zinc finger protein 326					ASH2L	ASH2 like, histone lysine methyltransferase complex subunit			ZNF708	zinc finger protein 708	ZNF587	zinc finger protein 587			CDV3	CDV3 homolog			ADCY3	adenylate cyclase 3	TTC28	tetratricopeptide repeat domain 28			FGFR2	fibroblast growth factor receptor 2	RGS8	regulator of G protein signaling 8	CHP2	calcineurin like EF-hand protein 2	NAA40	N(alpha)-acetyltransferase 40, NatD catalytic subunit
										BCL11A	BCL11A, BAF complex component	ZNF74	zinc finger protein 74	ZNF74	zinc finger protein 74	CGA	glycoprotein hormones, alpha polypeptide					PNMA2	PNMA family member 2			RNF217	ring finger protein 217	TDRKH	tudor and KH domain containing			AFTPH	aftiphilin			HDX	highly divergent homeobox	UTP20	UTP20, small subunit processome component			HNRNPUL2	heterogeneous nuclear ribonucleoprotein U like 2	HEMK1	HemK methyltransferase family member 1	ZNF18	zinc finger protein 18	SMAD9	SMAD family member 9
										ZNF275	zinc finger protein 275	POTEM	POTE ankyrin domain family member M	POTEM	POTE ankyrin domain family member M	OLFML3	olfactomedin like 3					ELF2	E74 like ETS transcription factor 2			SLC22A3	solute carrier family 22 member 3	CDH19	cadherin 19			SAV1	salvador family WW domain containing protein 1			PHTF2	putative homeodomain transcription factor 2	KDELC2	KDEL motif containing 2			TRERF1	transcriptional regulating factor 1	MDM4	MDM4, p53 regulator	TNNI1	troponin I1, slow skeletal type	ZNF160	zinc finger protein 160
										FXR1	FMR1 autosomal homolog 1	CACNA1E	calcium voltage-gated channel subunit alpha1 E	CACNA1E	calcium voltage-gated channel subunit alpha1 E	FAM129A	family with sequence similarity 129 member A					UNC80	unc-80 homolog, NALCN channel complex subunit			C10orf111	chromosome 10 open reading frame 111	AIM2	absent in melanoma 2			CDC7	cell division cycle 7			MREG	melanoregulin	LRRTM4	leucine rich repeat transmembrane neuronal 4			CNP	2',3'-cyclic nucleotide 3' phosphodiesterase	FDFT1	farnesyl-diphosphate farnesyltransferase 1	XYLB	xylulokinase	XPR1	xenotropic and polytropic retrovirus receptor 1
										NMNAT2	nicotinamide nucleotide adenylyltransferase 2	SNX27	sorting nexin family member 27	SNX27	sorting nexin family member 27	ZNF587	zinc finger protein 587					MBNL3	muscleblind like splicing regulator 3			ANKRD50	ankyrin repeat domain 50	HUNK	hormonally up-regulated Neu-associated kinase			JAK2	Janus kinase 2			RGS4	regulator of G protein signaling 4	IL17A	interleukin 17A			SPPL3	signal peptide peptidase like 3	LSM8	LSM8 homolog, U6 small nuclear RNA associated	ZNF580	zinc finger protein 580	UPF1	UPF1, RNA helicase and ATPase
										ISM2	isthmin 2	SLC4A8	solute carrier family 4 member 8	SLC4A8	solute carrier family 4 member 8	KRT39	keratin 39					BDP1	B double prime 1, subunit of RNA polymerase III transcription initiation factor IIIB			SEC24D	SEC24 homolog D, COPII coat complex component	HTT	huntingtin			OSR1	odd-skipped related transcription factor 1			TMEM41B	transmembrane protein 41B	CADM3	cell adhesion molecule 3			DOP1B	DOP1 leucine zipper like protein B	TCHH	trichohyalin	CDSN	corneodesmosin	ETNK1	ethanolamine kinase 1
										LIN7A	lin-7 homolog A, crumbs cell polarity complex component	TESMIN	testis expressed metallothionein like protein	TESMIN	testis expressed metallothionein like protein	MTMR12	myotubularin related protein 12					TNKS	tankyrase			PRRG4	proline rich and Gla domain 4	CELF5	CUGBP Elav-like family member 5			C7orf57	chromosome 7 open reading frame 57			MBIP	MAP3K12 binding inhibitory protein 1	PTPRE	protein tyrosine phosphatase, receptor type E			KIAA1324	KIAA1324	RORA	RAR related orphan receptor A	ARNT	aryl hydrocarbon receptor nuclear translocator	CD58	CD58 molecule
										KRTAP4-2	keratin associated protein 4-2	LPP	LIM domain containing preferred translocation partner in lipoma	LPP	LIM domain containing preferred translocation partner in lipoma	AAK1	AP2 associated kinase 1					PSTPIP2	proline-serine-threonine phosphatase interacting protein 2			ATP6V1C1	ATPase H+ transporting V1 subunit C1	TIMP2	TIMP metallopeptidase inhibitor 2			RAB8B	RAB8B, member RAS oncogene family			TMEM252	transmembrane protein 252	CAMK2A	calcium/calmodulin dependent protein kinase II alpha			WNT2B	Wnt family member 2B	DHRSX	dehydrogenase/reductase X-linked	NAPEPLD	N-acyl phosphatidylethanolamine phospholipase D	AP4B1	adaptor related protein complex 4 subunit beta 1
										PPM1L	protein phosphatase, Mg2+/Mn2+ dependent 1L	ZDHHC3	zinc finger DHHC-type containing 3	ZDHHC3	zinc finger DHHC-type containing 3	NDUFV3	NADH:ubiquinone oxidoreductase subunit V3					SSR3	signal sequence receptor subunit 3			PI15	peptidase inhibitor 15	TMEM19	transmembrane protein 19			MAML1	mastermind like transcriptional coactivator 1			GSK3B	glycogen synthase kinase 3 beta	PACS1	phosphofurin acidic cluster sorting protein 1			CAV1	caveolin 1	PDK3	pyruvate dehydrogenase kinase 3	AMIGO1	adhesion molecule with Ig like domain 1	ITGAV	integrin subunit alpha V
										DMRT2	doublesex and mab-3 related transcription factor 2	H6PD	hexose-6-phosphate dehydrogenase/glucose 1-dehydrogenase	H6PD	hexose-6-phosphate dehydrogenase/glucose 1-dehydrogenase	CMIP	c-Maf inducing protein					COQ2	coenzyme Q2, polyprenyltransferase			PDCD6IP	programmed cell death 6 interacting protein	TSPAN14	tetraspanin 14			ARAF	A-Raf proto-oncogene, serine/threonine kinase			PPM1L	protein phosphatase, Mg2+/Mn2+ dependent 1L	OGA	O-GlcNAcase			SPN	sialophorin	BTBD11	BTB domain containing 11	SPTLC2	serine palmitoyltransferase long chain base subunit 2	HAO1	hydroxyacid oxidase 1
										CACNA2D1	calcium voltage-gated channel auxiliary subunit alpha2delta 1	TMEM182	transmembrane protein 182	TMEM182	transmembrane protein 182	USP7	ubiquitin specific peptidase 7					KBTBD8	kelch repeat and BTB domain containing 8			CACNB4	calcium voltage-gated channel auxiliary subunit beta 4	ZNF619	zinc finger protein 619			EPB41L5	erythrocyte membrane protein band 4.1 like 5			TMEM182	transmembrane protein 182	KRT17	keratin 17			AADAT	aminoadipate aminotransferase	LAMP3	lysosomal associated membrane protein 3	DDR1	discoidin domain receptor tyrosine kinase 1	RXRA	retinoid X receptor alpha
										SNX1	sorting nexin 1	EEPD1	endonuclease/exonuclease/phosphatase family domain containing 1	EEPD1	endonuclease/exonuclease/phosphatase family domain containing 1	KCNJ5	potassium voltage-gated channel subfamily J member 5					TSR1	TSR1, ribosome maturation factor			FLNB	filamin B	INSYN1	inhibitory synaptic factor 1			TOP2B	DNA topoisomerase II beta			NT5DC1	5'-nucleotidase domain containing 1	DHX33	DEAH-box helicase 33			OPRM1	opioid receptor mu 1	SCD	stearoyl-CoA desaturase	PDE8B	phosphodiesterase 8B	GK	glycerol kinase
										PYHIN1	pyrin and HIN domain family member 1	AHDC1	AT-hook DNA binding motif containing 1	AHDC1	AT-hook DNA binding motif containing 1	BROX	BRO1 domain and CAAX motif containing					PTPRC	protein tyrosine phosphatase, receptor type C			UHRF2	ubiquitin like with PHD and ring finger domains 2	SERPINE2	serpin family E member 2			ZNF292	zinc finger protein 292			DCAF4L1	DDB1 and CUL4 associated factor 4 like 1	ARGFX	arginine-fifty homeobox			SOD1	superoxide dismutase 1	FCHO2	FCH domain only 2	P2RY8	P2Y receptor family member 8	CDNF	cerebral dopamine neurotrophic factor
										LAYN	layilin	FEZF2	FEZ family zinc finger 2	FEZF2	FEZ family zinc finger 2	TRIP11	thyroid hormone receptor interactor 11					EHMT2	euchromatic histone lysine methyltransferase 2			SLC24A2	solute carrier family 24 member 2	TOM1L2	target of myb1 like 2 membrane trafficking protein			ANKIB1	ankyrin repeat and IBR domain containing 1			EBNA1BP2	EBNA1 binding protein 2	ZNF619	zinc finger protein 619			VCAN	versican	ZBTB6	zinc finger and BTB domain containing 6	ADRB2	adrenoceptor beta 2	PHF3	PHD finger protein 3
										LUZP1	leucine zipper protein 1	PPARGC1B	PPARG coactivator 1 beta	PPARGC1B	PPARG coactivator 1 beta	NIPSNAP3B	nipsnap homolog 3B					OPHN1	oligophrenin 1			COX10	cytochrome c oxidase assembly factor heme A:farnesyltransferase COX10	UNC45A	unc-45 myosin chaperone A			SRSF2	serine and arginine rich splicing factor 2			TSHZ2	teashirt zinc finger homeobox 2	MRPL30	mitochondrial ribosomal protein L30			TTPAL	alpha tocopherol transfer protein like	METTL4	methyltransferase like 4	RUNX3	runt related transcription factor 3	SOX11	SRY-box 11
										SLC25A44	solute carrier family 25 member 44	ENG	endoglin	ENG	endoglin	ZNF816-ZNF321P	ZNF816-ZNF321P readthrough					GLB1	galactosidase beta 1			MAK16	MAK16 homolog	ARGFX	arginine-fifty homeobox			TIA1	TIA1 cytotoxic granule associated RNA binding protein			SERBP1	SERPINE1 mRNA binding protein 1	FRAS1	Fraser extracellular matrix complex subunit 1			CIAO2A	cytosolic iron-sulfur assembly component 2A	SGPP2	sphingosine-1-phosphate phosphatase 2	PRKX	protein kinase X-linked	FAM171A1	family with sequence similarity 171 member A1
										UBE2R2	ubiquitin conjugating enzyme E2 R2	TBC1D4	TBC1 domain family member 4	TBC1D4	TBC1 domain family member 4	MTUS2	microtubule associated scaffold protein 2					ZNF449	zinc finger protein 449			FAM217A	family with sequence similarity 217 member A	PAIP2B	poly(A) binding protein interacting protein 2B			PLCXD3	phosphatidylinositol specific phospholipase C X domain containing 3			KLHDC10	kelch domain containing 10	RCN3	reticulocalbin 3			LASP1	LIM and SH3 protein 1	NRIP1	nuclear receptor interacting protein 1	RIC8A	RIC8 guanine nucleotide exchange factor A	ZNF805	zinc finger protein 805
										PANK2	pantothenate kinase 2	YEATS2	YEATS domain containing 2	YEATS2	YEATS domain containing 2	MTMR2	myotubularin related protein 2					C18orf25	chromosome 18 open reading frame 25			VSTM4	V-set and transmembrane domain containing 4	NBPF1	NBPF member 1			GRM1	glutamate metabotropic receptor 1			FUNDC2	FUN14 domain containing 2	SNX27	sorting nexin family member 27			MYO10	myosin X	HRH4	histamine receptor H4	APAF1	apoptotic peptidase activating factor 1	PHLPP2	PH domain and leucine rich repeat protein phosphatase 2
										MGRN1	mahogunin ring finger 1	WDR45B	WD repeat domain 45B	WDR45B	WD repeat domain 45B	CLDN19	claudin 19					HIPK1	homeodomain interacting protein kinase 1			NABP1	nucleic acid binding protein 1	PACS2	phosphofurin acidic cluster sorting protein 2			C16orf46	chromosome 16 open reading frame 46			FAM19A1	family with sequence similarity 19 member A1, C-C motif chemokine like	PERP	PERP, TP53 apoptosis effector			SLC43A2	solute carrier family 43 member 2	ASB4	ankyrin repeat and SOCS box containing 4	RANGAP1	Ran GTPase activating protein 1	NEXMIF	neurite extension and migration factor
										PRTG	protogenin	GNAO1	G protein subunit alpha o1	GNAO1	G protein subunit alpha o1	DSTYK	dual serine/threonine and tyrosine protein kinase					HMGCR	3-hydroxy-3-methylglutaryl-CoA reductase			SLC8A2	solute carrier family 8 member A2	CRTAP	cartilage associated protein			SHANK2	SH3 and multiple ankyrin repeat domains 2			ST8SIA1	ST8 alpha-N-acetyl-neuraminide alpha-2,8-sialyltransferase 1	TMEM19	transmembrane protein 19			WDR73	WD repeat domain 73	MBNL2	muscleblind like splicing regulator 2	MACROD2	MACRO domain containing 2	SEC22B	SEC22 homolog B, vesicle trafficking protein (gene/pseudogene)
										IL6R	interleukin 6 receptor	SYS1	SYS1, golgi trafficking protein	SYS1	SYS1, golgi trafficking protein	NWD1	NACHT and WD repeat domain containing 1					SULF1	sulfatase 1			RGPD1	RANBP2-like and GRIP domain containing 1	KSR2	kinase suppressor of ras 2			NRXN1	neurexin 1			RABGEF1	RAB guanine nucleotide exchange factor 1	EPSTI1	epithelial stromal interaction 1			ARL16	ADP ribosylation factor like GTPase 16	ZFP14	ZFP14 zinc finger protein	IL2RG	interleukin 2 receptor subunit gamma	SLC22A14	solute carrier family 22 member 14
										PSD3	pleckstrin and Sec7 domain containing 3	MACF1	microtubule-actin crosslinking factor 1	MACF1	microtubule-actin crosslinking factor 1	RIOK2	RIO kinase 2					GPR82	G protein-coupled receptor 82			ERRFI1	ERBB receptor feedback inhibitor 1	DCAF7	DDB1 and CUL4 associated factor 7			SLC30A5	solute carrier family 30 member 5			KIF13B	kinesin family member 13B	MIER2	MIER family member 2			FOXG1	forkhead box G1	ADAMTS9	ADAM metallopeptidase with thrombospondin type 1 motif 9	EHD1	EH domain containing 1	CNTN1	contactin 1
										EDC3	enhancer of mRNA decapping 3	ZNF607	zinc finger protein 607	ZNF607	zinc finger protein 607	UMPS	uridine monophosphate synthetase					NLGN4X	neuroligin 4 X-linked			PALM2	paralemmin 2	CRTC1	CREB regulated transcription coactivator 1			ZNF200	zinc finger protein 200			LYN	LYN proto-oncogene, Src family tyrosine kinase	CDC42BPB	CDC42 binding protein kinase beta			JHY	junctional cadherin complex regulator	PLCXD1	phosphatidylinositol specific phospholipase C X domain containing 1	PRKAR2A	protein kinase cAMP-dependent type II regulatory subunit alpha	ST18	ST18, C2H2C-type zinc finger
										SLC29A3	solute carrier family 29 member 3	COQ9	coenzyme Q9	COQ9	coenzyme Q9	NCBP3	nuclear cap binding subunit 3					SRSF10	serine and arginine rich splicing factor 10			PLGRKT	plasminogen receptor with a C-terminal lysine	PNPLA5	patatin like phospholipase domain containing 5			AARD	alanine and arginine rich domain containing protein			PPIL4	peptidylprolyl isomerase like 4	INSYN1	inhibitory synaptic factor 1			NIPAL1	NIPA like domain containing 1	SNX1	sorting nexin 1	VPS25	vacuolar protein sorting 25 homolog	POU2F2	POU class 2 homeobox 2
										DUSP15	dual specificity phosphatase 15	CTDSPL2	CTD small phosphatase like 2	CTDSPL2	CTD small phosphatase like 2	SCN8A	sodium voltage-gated channel alpha subunit 8					PHC3	polyhomeotic homolog 3			PRRC2C	proline rich coiled-coil 2C	MBD6	methyl-CpG binding domain protein 6			NHLRC2	NHL repeat containing 2			TMLHE	trimethyllysine hydroxylase, epsilon	KLF7	Kruppel like factor 7			DDX47	DEAD-box helicase 47	SULT1E1	sulfotransferase family 1E member 1	CLSTN3	calsyntenin 3	TMEM159	transmembrane protein 159
										AK2	adenylate kinase 2	SMG1	SMG1, nonsense mediated mRNA decay associated PI3K related kinase	SMG1	SMG1, nonsense mediated mRNA decay associated PI3K related kinase	PYDC1	pyrin domain containing 1					RIOK3	RIO kinase 3			THEMIS2	thymocyte selection associated family member 2	SH3GLB1	SH3 domain containing GRB2 like, endophilin B1			SPDYE5	speedy/RINGO cell cycle regulator family member E5			AK4	adenylate kinase 4	TDRKH	tudor and KH domain containing			SRSF10	serine and arginine rich splicing factor 10	ICE2	interactor of little elongation complex ELL subunit 2	RERG	RAS like estrogen regulated growth inhibitor	GNB1L	G protein subunit beta 1 like
										RSPH3	radial spoke head 3 homolog	KSR2	kinase suppressor of ras 2	KSR2	kinase suppressor of ras 2	PDE4B	phosphodiesterase 4B					TNRC6B	trinucleotide repeat containing 6B			PROX2	prospero homeobox 2	TEAD3	TEA domain transcription factor 3			MMP8	matrix metallopeptidase 8			ACAP2	ArfGAP with coiled-coil, ankyrin repeat and PH domains 2	CBX6	chromobox 6			TTC14	tetratricopeptide repeat domain 14	DCBLD2	discoidin, CUB and LCCL domain containing 2	TTC3	tetratricopeptide repeat domain 3	LGALSL	galectin like
										MBTPS2	membrane bound transcription factor peptidase, site 2	C7orf33	chromosome 7 open reading frame 33	C7orf33	chromosome 7 open reading frame 33	RMND5A	required for meiotic nuclear division 5 homolog A					PRPF38B	pre-mRNA processing factor 38B			LYRM7	LYR motif containing 7	SLX4IP	SLX4 interacting protein			KLHL11	kelch like family member 11			FAM126B	family with sequence similarity 126 member B	PACS2	phosphofurin acidic cluster sorting protein 2			TAF1L	TATA-box binding protein associated factor 1 like	ARFIP1	ADP ribosylation factor interacting protein 1	KDM5A	lysine demethylase 5A	TOX4	TOX high mobility group box family member 4
										UPF2	UPF2, regulator of nonsense mediated mRNA decay	SLC25A36	solute carrier family 25 member 36	SLC25A36	solute carrier family 25 member 36	PRDM1	PR/SET domain 1					DNAJB9	DnaJ heat shock protein family (Hsp40) member B9			CACNA1B	calcium voltage-gated channel subunit alpha1 B	KLHL3	kelch like family member 3			SBSPON	somatomedin B and thrombospondin type 1 domain containing			BICD1	BICD cargo adaptor 1	CELF5	CUGBP Elav-like family member 5			MPV17L	MPV17 mitochondrial inner membrane protein like	UTP23	UTP23, small subunit processome component	AURKA	aurora kinase A	CCDC141	coiled-coil domain containing 141
										MYLK3	myosin light chain kinase 3	MC1R	melanocortin 1 receptor	MC1R	melanocortin 1 receptor	TFDP2	transcription factor Dp-2					A1CF	APOBEC1 complementation factor			PSAPL1	prosaposin like 1 (gene/pseudogene)	TTC28	tetratricopeptide repeat domain 28			LCORL	ligand dependent nuclear receptor corepressor like			TOX	thymocyte selection associated high mobility group box	AKT2	AKT serine/threonine kinase 2			CRK	CRK proto-oncogene, adaptor protein	KLF12	Kruppel like factor 12	ARF3	ADP ribosylation factor 3	LRRK2	leucine rich repeat kinase 2
										PLPP6	phospholipid phosphatase 6	SEL1L	SEL1L, ERAD E3 ligase adaptor subunit	SEL1L	SEL1L, ERAD E3 ligase adaptor subunit	ADCY2	adenylate cyclase 2					LANCL3	LanC like 3			CEP97	centrosomal protein 97	SCN8A	sodium voltage-gated channel alpha subunit 8			CENPU	centromere protein U			ITGA4	integrin subunit alpha 4	ZNF578	zinc finger protein 578			CNOT6L	CCR4-NOT transcription complex subunit 6 like	ZBTB2	zinc finger and BTB domain containing 2	SIRPB1	signal regulatory protein beta 1	DLC1	DLC1 Rho GTPase activating protein
										NSFL1C	NSFL1 cofactor	SNCB	synuclein beta	SNCB	synuclein beta	HDAC6	histone deacetylase 6					MAGEB3	MAGE family member B3			GABBR2	gamma-aminobutyric acid type B receptor subunit 2	CHST6	carbohydrate sulfotransferase 6			ZNF211	zinc finger protein 211			GHSR	growth hormone secretagogue receptor	CRTAP	cartilage associated protein			DMBX1	diencephalon/mesencephalon homeobox 1	ZNF611	zinc finger protein 611	2008-03-01	membrane associated ring-CH-type finger 8	TCF25	transcription factor 25
										BMP6	bone morphogenetic protein 6	MAPKBP1	mitogen-activated protein kinase binding protein 1	MAPKBP1	mitogen-activated protein kinase binding protein 1	KCNMA1	potassium calcium-activated channel subfamily M alpha 1					ARPP19	cAMP regulated phosphoprotein 19			PGR	progesterone receptor	HERC6	HECT and RLD domain containing E3 ubiquitin protein ligase family member 6			AGPS	alkylglycerone phosphate synthase			RPP30	ribonuclease P/MRP subunit p30	CDH19	cadherin 19			SUN3	Sad1 and UNC84 domain containing 3	TM4SF20	transmembrane 4 L six family member 20	CHI3L1	chitinase 3 like 1	UBN1	ubinuclein 1
										BRAP	BRCA1 associated protein	IER5L	immediate early response 5 like	IER5L	immediate early response 5 like	GRK6	G protein-coupled receptor kinase 6					CEMIP2	cell migration inducing hyaluronidase 2			RTL5	retrotransposon Gag like 5	KIAA0513	KIAA0513			ADAM10	ADAM metallopeptidase domain 10			SNX25	sorting nexin 25	AIM2	absent in melanoma 2			GALNT6	polypeptide N-acetylgalactosaminyltransferase 6	ZC3HAV1	zinc finger CCCH-type containing, antiviral 1	RHOF	ras homolog family member F, filopodia associated	MED13	mediator complex subunit 13
										NRSN2	neurensin 2	ANKRD44	ankyrin repeat domain 44	ANKRD44	ankyrin repeat domain 44	SLC4A8	solute carrier family 4 member 8					RUNX2	runt related transcription factor 2			STK26	serine/threonine kinase 26	H6PD	hexose-6-phosphate dehydrogenase/glucose 1-dehydrogenase			ITGA4	integrin subunit alpha 4			RORA	RAR related orphan receptor A	TSPAN13	tetraspanin 13			RPL28	ribosomal protein L28	NFAT5	nuclear factor of activated T cells 5	SMARCA2	SWI/SNF related, matrix associated, actin dependent regulator of chromatin, subfamily a, member 2	METTL21C	methyltransferase like 21C
										PLAU	plasminogen activator, urokinase	MANEAL	mannosidase endo-alpha like	MANEAL	mannosidase endo-alpha like	IPCEF1	interaction protein for cytohesin exchange factors 1					KCTD12	potassium channel tetramerization domain containing 12			MEAF6	MYST/Esa1 associated factor 6	MYH9	myosin heavy chain 9			DDX46	DEAD-box helicase 46			CDC73	cell division cycle 73	SLX4IP	SLX4 interacting protein			PALLD	palladin, cytoskeletal associated protein	TTC14	tetratricopeptide repeat domain 14	MGAT3	mannosyl (beta-1,4-)-glycoprotein beta-1,4-N-acetylglucosaminyltransferase	SIRT1	sirtuin 1
										NXN	nucleoredoxin	ZNF705D	zinc finger protein 705D	ZNF705D	zinc finger protein 705D	KCNG1	potassium voltage-gated channel modifier subfamily G member 1					DNAJC21	DnaJ heat shock protein family (Hsp40) member C21			ACAT1	acetyl-CoA acetyltransferase 1	NRG1	neuregulin 1			ZNF286B	zinc finger protein 286B			ASPN	asporin	ZPR1	ZPR1 zinc finger			KAT6A	lysine acetyltransferase 6A	THUMPD2	THUMP domain containing 2	AQP2	aquaporin 2	DCTD	dCMP deaminase
										CA10	carbonic anhydrase 10	PARP8	poly(ADP-ribose) polymerase family member 8	PARP8	poly(ADP-ribose) polymerase family member 8	F11R	F11 receptor					CAND1	cullin associated and neddylation dissociated 1			KCNV1	potassium voltage-gated channel modifier subfamily V member 1	KLF7	Kruppel like factor 7			ABHD13	abhydrolase domain containing 13			CLIP4	CAP-Gly domain containing linker protein family member 4	PAIP2B	poly(A) binding protein interacting protein 2B			GTF2H5	general transcription factor IIH subunit 5	SUV39H2	suppressor of variegation 3-9 homolog 2	SLC7A8	solute carrier family 7 member 8	ADAMTS3	ADAM metallopeptidase with thrombospondin type 1 motif 3
										SPOCK3	SPARC (osteonectin), cwcv and kazal like domains proteoglycan 3	CCDC124	coiled-coil domain containing 124	CCDC124	coiled-coil domain containing 124	RBM4	RNA binding motif protein 4					SAR1A	secretion associated Ras related GTPase 1A			C9orf43	chromosome 9 open reading frame 43	RWDD2B	RWD domain containing 2B			RANBP3L	RAN binding protein 3 like			KCTD3	potassium channel tetramerization domain containing 3	MBNL3	muscleblind like splicing regulator 3			GIGYF1	GRB10 interacting GYF protein 1	OCLN	occludin	ELMO2	engulfment and cell motility 2	TMED5	transmembrane p24 trafficking protein 5
										ADCY1	adenylate cyclase 1	SEMA6A	semaphorin 6A	SEMA6A	semaphorin 6A	LDHA	lactate dehydrogenase A					PIP4K2A	phosphatidylinositol-5-phosphate 4-kinase type 2 alpha			ASCC2	activating signal cointegrator 1 complex subunit 2	TEX261	testis expressed 261			ZNF714	zinc finger protein 714			PFDN4	prefoldin subunit 4	TSPAN14	tetraspanin 14			CCR6	C-C motif chemokine receptor 6	GRAMD1B	GRAM domain containing 1B	AGBL4	ATP/GTP binding protein like 4	NFIB	nuclear factor I B
										RILPL1	Rab interacting lysosomal protein like 1	PDLIM5	PDZ and LIM domain 5	PDLIM5	PDZ and LIM domain 5	MBD4	methyl-CpG binding domain 4, DNA glycosylase					ATP5PB	ATP synthase peripheral stalk-membrane subunit b			F5	coagulation factor V	PPAN-P2RY11	PPAN-P2RY11 readthrough			ABHD2	abhydrolase domain containing 2			SPCS3	signal peptidase complex subunit 3	SERPINE2	serpin family E member 2			BICC1	BicC family RNA binding protein 1	ZNF577	zinc finger protein 577	FGFR1	fibroblast growth factor receptor 1	MOSPD2	motile sperm domain containing 2
										CALN1	calneuron 1	ZRANB1	zinc finger RANBP2-type containing 1	ZRANB1	zinc finger RANBP2-type containing 1	MEAK7	MTOR associated protein, eak-7 homolog					ZC3H14	zinc finger CCCH-type containing 14			TEFM	transcription elongation factor, mitochondrial	MTFMT	mitochondrial methionyl-tRNA formyltransferase			PLEKHA3	pleckstrin homology domain containing A3			PDZD2	PDZ domain containing 2	HUNK	hormonally up-regulated Neu-associated kinase			IVD	isovaleryl-CoA dehydrogenase	RALGAPA1	Ral GTPase activating protein catalytic alpha subunit 1	MKNK1	MAP kinase interacting serine/threonine kinase 1	STRN	striatin
										PALM2	paralemmin 2	NOS3	nitric oxide synthase 3	NOS3	nitric oxide synthase 3	LIN7A	lin-7 homolog A, crumbs cell polarity complex component					SMIM8	small integral membrane protein 8			ST6GALNAC5	ST6 N-acetylgalactosaminide alpha-2,6-sialyltransferase 5	AKT2	AKT serine/threonine kinase 2			LRRC1	leucine rich repeat containing 1			ZNF781	zinc finger protein 781	HTT	huntingtin			MYO3B	myosin IIIB	TBCA	tubulin folding cofactor A	CELF1	CUGBP Elav-like family member 1	TBC1D1	TBC1 domain family member 1
										NPLOC4	NPL4 homolog, ubiquitin recognition factor	ZNF705A	zinc finger protein 705A	ZNF705A	zinc finger protein 705A	GRM7	glutamate metabotropic receptor 7					OAZ1	ornithine decarboxylase antizyme 1			GHSR	growth hormone secretagogue receptor	MEF2D	myocyte enhancer factor 2D			MTCH2	mitochondrial carrier 2			HDAC6	histone deacetylase 6	UNC45A	unc-45 myosin chaperone A			MAN2A2	mannosidase alpha class 2A member 2	ZNF672	zinc finger protein 672	LUZP4	leucine zipper protein 4	RIMBP2	RIMS binding protein 2
										CALHM5	calcium homeostasis modulator family member 5	ZNF705E	zinc finger protein 705E	ZNF705E	zinc finger protein 705E	HSD11B2	hydroxysteroid 11-beta dehydrogenase 2					PLAGL2	PLAG1 like zinc finger 2			RBM12	RNA binding motif protein 12	SNX27	sorting nexin family member 27			PRAG1	PEAK1 related, kinase-activating pseudokinase 1			ABHD13	abhydrolase domain containing 13	NEK2	NIMA related kinase 2			IL1A	interleukin 1 alpha	ZBTB20	zinc finger and BTB domain containing 20	FOXA1	forkhead box A1	SHOX2	short stature homeobox 2
										2011-09-01	septin 11	BRI3BP	BRI3 binding protein	BRI3BP	BRI3 binding protein	PXMP4	peroxisomal membrane protein 4					ZNF407	zinc finger protein 407			YME1L1	YME1 like 1 ATPase	OC90	otoconin 90			LOC100287896	uncharacterized LOC100287896			C8orf34	chromosome 8 open reading frame 34	CHST6	carbohydrate sulfotransferase 6			FBXL13	F-box and leucine rich repeat protein 13	SGCB	sarcoglycan beta	ARHGEF38	Rho guanine nucleotide exchange factor 38	HDDC2	HD domain containing 2
										SPTB	spectrin beta, erythrocytic	CCAR2	cell cycle and apoptosis regulator 2	CCAR2	cell cycle and apoptosis regulator 2	TSPAN6	tetraspanin 6					LHCGR	luteinizing hormone/choriogonadotropin receptor			MFAP1	microfibril associated protein 1	CBX6	chromobox 6			ZNF451	zinc finger protein 451			TENT4B	terminal nucleotidyltransferase 4B	TOM1L2	target of myb1 like 2 membrane trafficking protein			FAM8A1	family with sequence similarity 8 member A1	FAXC	failed axon connections homolog	HIP1	huntingtin interacting protein 1	CCDC57	coiled-coil domain containing 57
										ZDHHC3	zinc finger DHHC-type containing 3	RTN4RL2	reticulon 4 receptor like 2	RTN4RL2	reticulon 4 receptor like 2	RAB33B	RAB33B, member RAS oncogene family					HTATSF1	HIV-1 Tat specific factor 1			SAA2	serum amyloid A2	PVR	poliovirus receptor			RGS7	regulator of G protein signaling 7			GRIA4	glutamate ionotropic receptor AMPA type subunit 4	SLC4A8	solute carrier family 4 member 8			SLC6A4	solute carrier family 6 member 4	NRAS	NRAS proto-oncogene, GTPase	PAN2	poly(A) specific ribonuclease subunit PAN2	SREK1	splicing regulatory glutamic acid and lysine rich protein 1
										YPEL4	yippee like 4	FTO	FTO, alpha-ketoglutarate dependent dioxygenase	FTO	FTO, alpha-ketoglutarate dependent dioxygenase	TNS3	tensin 3					ZBTB20	zinc finger and BTB domain containing 20			MRPS11	mitochondrial ribosomal protein S11	LOC100130357	uncharacterized LOC100130357			CCAR1	cell division cycle and apoptosis regulator 1			SLC16A4	solute carrier family 16 member 4	CRTC1	CREB regulated transcription coactivator 1			MRPL57	mitochondrial ribosomal protein L57	RNF2	ring finger protein 2	GOLGA1	golgin A1	NCAPG2	non-SMC condensin II complex subunit G2
										RAB22A	RAB22A, member RAS oncogene family	MGAT5B	alpha-1,6-mannosylglycoprotein 6-beta-N-acetylglucosaminyltransferase B	MGAT5B	alpha-1,6-mannosylglycoprotein 6-beta-N-acetylglucosaminyltransferase B	IPP	intracisternal A particle-promoted polypeptide					EYA4	EYA transcriptional coactivator and phosphatase 4			STOX2	storkhead box 2	GPR34	G protein-coupled receptor 34			TDRD1	tudor domain containing 1			RNF138	ring finger protein 138	PNPLA5	patatin like phospholipase domain containing 5			CCDC89	coiled-coil domain containing 89	TAP2	transporter 2, ATP binding cassette subfamily B member	SHISA7	shisa family member 7	FRMD6	FERM domain containing 6
										RTF2	replication termination factor 2	ZNF292	zinc finger protein 292	ZNF292	zinc finger protein 292	TECPR2	tectonin beta-propeller repeat containing 2					SGPL1	sphingosine-1-phosphate lyase 1			PTPN14	protein tyrosine phosphatase, non-receptor type 14	RMND5B	required for meiotic nuclear division 5 homolog B			ZNF516	zinc finger protein 516			NCOA2	nuclear receptor coactivator 2	MBD6	methyl-CpG binding domain protein 6			FHIT	fragile histidine triad	TANGO2	transport and golgi organization 2 homolog	TRIM25	tripartite motif containing 25	DACH1	dachshund family transcription factor 1
										ZFP36L2	ZFP36 ring finger protein like 2	RAVER1	ribonucleoprotein, PTB binding 1	RAVER1	ribonucleoprotein, PTB binding 1	KAT5	lysine acetyltransferase 5					ATAD1	ATPase family, AAA domain containing 1			CD1A	CD1a molecule	CROT	carnitine O-octanoyltransferase			COLEC10	collectin subfamily member 10			OCIAD1	OCIA domain containing 1	SH3GLB1	SH3 domain containing GRB2 like, endophilin B1			ZC3H7A	zinc finger CCCH-type containing 7A	ST6GAL2	ST6 beta-galactoside alpha-2,6-sialyltransferase 2	TSPAN11	tetraspanin 11	GTF2H5	general transcription factor IIH subunit 5
										SLC25A17	solute carrier family 25 member 17	VAPB	VAMP associated protein B and C	VAPB	VAMP associated protein B and C	CCNT2	cyclin T2					SERPINB10	serpin family B member 10			ELAVL3	ELAV like RNA binding protein 3	AK2	adenylate kinase 2			SCP2	sterol carrier protein 2			PRRC2C	proline rich coiled-coil 2C	TVP23A	trans-golgi network vesicle protein 23 homolog A			ZC2HC1B	zinc finger C2HC-type containing 1B	FAM234B	family with sequence similarity 234 member B	CALN1	calneuron 1	OLFML2A	olfactomedin like 2A
										INPP5B	inositol polyphosphate-5-phosphatase B	TMEM189-UBE2V1	TMEM189-UBE2V1 readthrough	TMEM189-UBE2V1	TMEM189-UBE2V1 readthrough	SMIM24	small integral membrane protein 24					TMOD2	tropomodulin 2			PLXDC2	plexin domain containing 2	MBNL3	muscleblind like splicing regulator 3			CXorf56	chromosome X open reading frame 56			SLC4A7	solute carrier family 4 member 7	TGM2	transglutaminase 2			RMDN3	regulator of microtubule dynamics 3	ENPP1	ectonucleotide pyrophosphatase/phosphodiesterase 1	KRT31	keratin 31	CCER1	coiled-coil glutamate rich protein 1
										CHST10	carbohydrate sulfotransferase 10	NEBL	nebulette	NEBL	nebulette	TTC22	tetratricopeptide repeat domain 22					PABPC4L	poly(A) binding protein cytoplasmic 4 like			MMP16	matrix metallopeptidase 16	KCNC1	potassium voltage-gated channel subfamily C member 1			CEP128	centrosomal protein 128			RAP2A	RAP2A, member of RAS oncogene family	KLHL3	kelch like family member 3			RBBP5	RB binding protein 5, histone lysine methyltransferase complex subunit	PCSK6	proprotein convertase subtilisin/kexin type 6	ESAM	endothelial cell adhesion molecule	CENPBD1	CENPB DNA-binding domain containing 1
												TCEAL5	transcription elongation factor A like 5	TCEAL5	transcription elongation factor A like 5	SPECC1	sperm antigen with calponin homology and coiled-coil domains 1					FSD1L	fibronectin type III and SPRY domain containing 1 like			TNFAIP6	TNF alpha induced protein 6	RND1	Rho family GTPase 1			NAPEPLD	N-acyl phosphatidylethanolamine phospholipase D			MRVI1	murine retrovirus integration site 1 homolog	KIAA0513	KIAA0513			BRMS1L	BRMS1 like transcriptional repressor	TMCC1	transmembrane and coiled-coil domain family 1	SZRD1	SUZ RNA binding domain containing 1	AKAP7	A-kinase anchoring protein 7
												EFCAB14	EF-hand calcium binding domain 14	EFCAB14	EF-hand calcium binding domain 14	AGPAT5	1-acylglycerol-3-phosphate O-acyltransferase 5					DCP2	decapping mRNA 2			KIF3A	kinesin family member 3A	RIC8B	RIC8 guanine nucleotide exchange factor B			DR1	down-regulator of transcription 1			DCLK1	doublecortin like kinase 1	ATP6V0D2	ATPase H+ transporting V0 subunit d2			PDE6A	phosphodiesterase 6A	CRYAA	crystallin alpha A	VDR	vitamin D receptor	ICE2	interactor of little elongation complex ELL subunit 2
												PLEKHG4B	pleckstrin homology and RhoGEF domain containing G4B	PLEKHG4B	pleckstrin homology and RhoGEF domain containing G4B	TMEM120B	transmembrane protein 120B					RANBP6	RAN binding protein 6			RWDD4	RWD domain containing 4	SLC4A8	solute carrier family 4 member 8			C10orf25	chromosome 10 open reading frame 25			THSD1	thrombospondin type 1 domain containing 1	HERC6	HECT and RLD domain containing E3 ubiquitin protein ligase family member 6			OASL	2'-5'-oligoadenylate synthetase like	CHMP1B	charged multivesicular body protein 1B	CMTM4	CKLF like MARVEL transmembrane domain containing 4	PARP11	poly(ADP-ribose) polymerase family member 11
												GALNTL6	polypeptide N-acetylgalactosaminyltransferase like 6	GALNTL6	polypeptide N-acetylgalactosaminyltransferase like 6	FANCA	FA complementation group A					PRDM5	PR/SET domain 5			IVD	isovaleryl-CoA dehydrogenase	GOSR2	golgi SNAP receptor complex member 2			ZNF280D	zinc finger protein 280D			NOL11	nucleolar protein 11	NRG1	neuregulin 1			ZYG11B	zyg-11 family member B, cell cycle regulator	FAM122B	family with sequence similarity 122B	SLC39A11	solute carrier family 39 member 11	LIN7A	lin-7 homolog A, crumbs cell polarity complex component
												ULBP1	UL16 binding protein 1	ULBP1	UL16 binding protein 1	TMEM156	transmembrane protein 156					KCNA1	potassium voltage-gated channel subfamily A member 1			B3GLCT	beta 3-glucosyltransferase	RPH3A	rabphilin 3A			QKI	QKI, KH domain containing RNA binding			MSH2	mutS homolog 2	OPA1	OPA1, mitochondrial dynamin like GTPase			COLEC11	collectin subfamily member 11	IARS	isoleucyl-tRNA synthetase	PLAC9	placenta specific 9	PTPRB	protein tyrosine phosphatase, receptor type B
												SPECC1	sperm antigen with calponin homology and coiled-coil domains 1	SPECC1	sperm antigen with calponin homology and coiled-coil domains 1	ZDHHC23	zinc finger DHHC-type containing 23					CYLC2	cylicin 2			ZMYM2	zinc finger MYM-type containing 2	LARP6	La ribonucleoprotein domain family member 6			RELCH	RAB11 binding and LisH domain, coiled-coil and HEAT repeat containing			CCDC25	coiled-coil domain containing 25	RWDD2B	RWD domain containing 2B			DACT1	dishevelled binding antagonist of beta catenin 1	GLRX2	glutaredoxin 2	NIT2	nitrilase family member 2	PHKA1	phosphorylase kinase regulatory subunit alpha 1
												THAP1	THAP domain containing 1	THAP1	THAP domain containing 1	DMKN	dermokine					NOVA1	NOVA alternative splicing regulator 1			CDC42EP3	CDC42 effector protein 3	ZKSCAN1	zinc finger with KRAB and SCAN domains 1			EBF1	EBF transcription factor 1			C1orf116	chromosome 1 open reading frame 116	PSD	pleckstrin and Sec7 domain containing			MDM1	Mdm1 nuclear protein	TRIM37	tripartite motif containing 37	TRAM2	translocation associated membrane protein 2	AFDN	afadin, adherens junction formation factor
												PLD2	phospholipase D2	PLD2	phospholipase D2	CACNB2	calcium voltage-gated channel auxiliary subunit beta 2					RAPH1	Ras association (RalGDS/AF-6) and pleckstrin homology domains 1			EPHA7	EPH receptor A7	SNX20	sorting nexin 20			INSM1	INSM transcriptional repressor 1			SOCS4	suppressor of cytokine signaling 4	BEAN1	brain expressed associated with NEDD4 1			ATAD3C	ATPase family, AAA domain containing 3C	SP4	Sp4 transcription factor	SUDS3	SDS3 homolog, SIN3A corepressor complex component	PBX1	PBX homeobox 1
												RPA1	replication protein A1	RPA1	replication protein A1	MAPRE2	microtubule associated protein RP/EB family member 2					HEBP2	heme binding protein 2			GRIK1	glutamate ionotropic receptor kainate type subunit 1	SLC26A6	solute carrier family 26 member 6			PERP	PERP, TP53 apoptosis effector			FKTN	fukutin	PPAN-P2RY11	PPAN-P2RY11 readthrough			BACE1	beta-secretase 1	MTPAP	mitochondrial poly(A) polymerase	ARPP21	cAMP regulated phosphoprotein 21	ZNF695	zinc finger protein 695
												MIF4GD	MIF4G domain containing	MIF4GD	MIF4G domain containing	C21orf58	chromosome 21 open reading frame 58					ZIC4	Zic family member 4			LRP5L	LDL receptor related protein 5 like	ATOH8	atonal bHLH transcription factor 8			DLEU7	deleted in lymphocytic leukemia 7			RAPGEF2	Rap guanine nucleotide exchange factor 2	PAQR5	progestin and adipoQ receptor family member 5			QPRT	quinolinate phosphoribosyltransferase	RNF40	ring finger protein 40	TGFA	transforming growth factor alpha	C2orf78	chromosome 2 open reading frame 78
												ZKSCAN4	zinc finger with KRAB and SCAN domains 4	ZKSCAN4	zinc finger with KRAB and SCAN domains 4	NAIP	NLR family apoptosis inhibitory protein					PIK3R3	phosphoinositide-3-kinase regulatory subunit 3			MB21D2	Mab-21 domain containing 2	TVP23A	trans-golgi network vesicle protein 23 homolog A			CARF	calcium responsive transcription factor			TSPAN7	tetraspanin 7	AK2	adenylate kinase 2			CBLN2	cerebellin 2 precursor	UQCRB	ubiquinol-cytochrome c reductase binding protein	ATP5PB	ATP synthase peripheral stalk-membrane subunit b
												SKP2	S-phase kinase associated protein 2	SKP2	S-phase kinase associated protein 2	SCAMP1	secretory carrier membrane protein 1					COPS3	COP9 signalosome subunit 3			RALGPS2	Ral GEF with PH domain and SH3 binding motif 2	CD2AP	CD2 associated protein			WDR82	WD repeat domain 82			SYNE1	spectrin repeat containing nuclear envelope protein 1	HOGA1	4-hydroxy-2-oxoglutarate aldolase 1			KCNN3	potassium calcium-activated channel subfamily N member 3	PCBD2	pterin-4 alpha-carbinolamine dehydratase 2	DHCR24	24-dehydrocholesterol reductase
												TP53INP2	tumor protein p53 inducible nuclear protein 2	TP53INP2	tumor protein p53 inducible nuclear protein 2	MAN2A2	mannosidase alpha class 2A member 2					TRIM23	tripartite motif containing 23			IARS	isoleucyl-tRNA synthetase	PDE3A	phosphodiesterase 3A			KCNK5	potassium two pore domain channel subfamily K member 5			ANLN	anillin actin binding protein	KSR2	kinase suppressor of ras 2			ZHX3	zinc fingers and homeoboxes 3	ZFAND5	zinc finger AN1-type containing 5	ITGAL	integrin subunit alpha L
												NOVA2	NOVA alternative splicing regulator 2	NOVA2	NOVA alternative splicing regulator 2	ARSA	arylsulfatase A					MBOAT1	membrane bound O-acyltransferase domain containing 1			ALOX15	arachidonate 15-lipoxygenase	MIER2	MIER family member 2			ARX	aristaless related homeobox			CLINT1	clathrin interactor 1	KCNC1	potassium voltage-gated channel subfamily C member 1			SCYL2	SCY1 like pseudokinase 2	TRAK1	trafficking kinesin protein 1	PPIF	peptidylprolyl isomerase F
												USP47	ubiquitin specific peptidase 47	USP47	ubiquitin specific peptidase 47	MTX3	metaxin 3					SGIP1	SH3 domain GRB2 like endophilin interacting protein 1			PTPRD	protein tyrosine phosphatase, receptor type D	FBXO45	F-box protein 45			TMEM26	transmembrane protein 26			PKHD1	PKHD1, fibrocystin/polyductin	NAV1	neuron navigator 1			SYNJ2BP	synaptojanin 2 binding protein	SLC31A1	solute carrier family 31 member 1	PRG2	proteoglycan 2, pro eosinophil major basic protein
												PSMF1	proteasome inhibitor subunit 1	PSMF1	proteasome inhibitor subunit 1	PPARD	peroxisome proliferator activated receptor delta					GLIS3	GLIS family zinc finger 3			USP9X	ubiquitin specific peptidase 9 X-linke	OPA1	OPA1, mitochondrial dynamin like GTPase			PATZ1	POZ/BTB and AT hook containing zinc finger 1			IGSF11	immunoglobulin superfamily member 11	LOC100130357	uncharacterized LOC100130357			RTN3	reticulon 3	CCDC186	coiled-coil domain containing 186	CLTA	clathrin light chain A
												C2CD2L	C2CD2 like	C2CD2L	C2CD2 like	ZC3H12D	zinc finger CCCH-type containing 12D					RINL	Ras and Rab interactor like					RGS8	regulator of G protein signaling 8			HDAC9	histone deacetylase 9			MMGT1	membrane magnesium transporter 1	SRGAP2	SLIT-ROBO Rho GTPase activating protein 2			PHC3	polyhomeotic homolog 3	PTEN	phosphatase and tensin homolog	EIF4EBP2	eukaryotic translation initiation factor 4E binding protein 2
												IGF2BP1	insulin like growth factor 2 mRNA binding protein 1	IGF2BP1	insulin like growth factor 2 mRNA binding protein 1	SRGAP1	SLIT-ROBO Rho GTPase activating protein 1					RBM7	RNA binding motif protein 7					NPPC	natriuretic peptide C			COQ10B	coenzyme Q10B			CHIC1	cysteine rich hydrophobic domain 1	GPR34	G protein-coupled receptor 34			CHD9	chromodomain helicase DNA binding protein 9	RC3H1	ring finger and CCCH-type domains 1	CLDN1	claudin 1
												DHTKD1	dehydrogenase E1 and transketolase domain containing 1	DHTKD1	dehydrogenase E1 and transketolase domain containing 1	LIX1	limb and CNS expressed 1					ZC3H6	zinc finger CCCH-type containing 6					CHD9	chromodomain helicase DNA binding protein 9			MAP3K1	mitogen-activated protein kinase kinase kinase 1			PGGT1B	protein geranylgeranyltransferase type I subunit beta	RMND5B	required for meiotic nuclear division 5 homolog B			TIGAR	TP53 induced glycolysis regulatory phosphatase	RASSF5	Ras association domain family member 5	MCL1	MCL1, BCL2 family apoptosis regulator
												STAMBP	STAM binding protein	STAMBP	STAM binding protein	TNFAIP6	TNF alpha induced protein 6					AZIN1	antizyme inhibitor 1					FOXL2NB	FOXL2 neighbor			DICER1	dicer 1, ribonuclease III			ZFX	zinc finger protein X-linked	CROT	carnitine O-octanoyltransferase			SLC4A5	solute carrier family 4 member 5	ATP5MC3	ATP synthase membrane subunit c locus 3	MFSD14B	major facilitator superfamily domain containing 14B
												TNRC6B	trinucleotide repeat containing 6B	TNRC6B	trinucleotide repeat containing 6B	DPF3	double PHD fingers 3					PCDH8	protocadherin 8					TRIM40	tripartite motif containing 40			ZNF484	zinc finger protein 484			HSD17B12	hydroxysteroid 17-beta dehydrogenase 12	FOXL2NB	FOXL2 neighbor			CAMK4	calcium/calmodulin dependent protein kinase IV	ZNF845	zinc finger protein 845	C20orf96	chromosome 20 open reading frame 96
												DHH	desert hedgehog signaling molecule	DHH	desert hedgehog signaling molecule	EXOG	exo/endonuclease G					TMOD1	tropomodulin 1					ACER2	alkaline ceramidase 2			DAPK1	death associated protein kinase 1			ABHD10	abhydrolase domain containing 10	PVR	poliovirus receptor			ZNF44	zinc finger protein 44	RHOU	ras homolog family member U	HECTD2	HECT domain E3 ubiquitin protein ligase 2
												STPG4	sperm-tail PG-rich repeat containing 4	STPG4	sperm-tail PG-rich repeat containing 4	ENTPD1	ectonucleoside triphosphate diphosphohydrolase 1					LDHA	lactate dehydrogenase A					SLC29A3	solute carrier family 29 member 3			SCN3A	sodium voltage-gated channel alpha subunit 3			GPR174	G protein-coupled receptor 174	NWD1	NACHT and WD repeat domain containing 1			PDP2	pyruvate dehyrogenase phosphatase catalytic subunit 2	TRIB2	tribbles pseudokinase 2	STARD4	StAR related lipid transfer domain containing 4
												H2AFX	H2A histone family member X	H2AFX	H2A histone family member X	PPP1R16B	protein phosphatase 1 regulatory subunit 16B					RSAD2	radical S-adenosyl methionine domain containing 2					UTP20	UTP20, small subunit processome component			USP15	ubiquitin specific peptidase 15			KHDRBS1	KH RNA binding domain containing, signal transduction associated 1	RALY	RALY heterogeneous nuclear ribonucleoprotein			RINL	Ras and Rab interactor like	MPZL3	myelin protein zero like 3	AMN1	antagonist of mitotic exit network 1 homolog
												ADGRL3	adhesion G protein-coupled receptor L3	ADGRL3	adhesion G protein-coupled receptor L3	PPP1R1C	protein phosphatase 1 regulatory inhibitor subunit 1C					LMNA	lamin A/C					SLC16A14	solute carrier family 16 member 14			TBX3	T-box 3			PHF21B	PHD finger protein 21B	RND1	Rho family GTPase 1			C1orf43	chromosome 1 open reading frame 43	CYP4V2	cytochrome P450 family 4 subfamily V member 2	KCTD12	potassium channel tetramerization domain containing 12
												RIMBP3	RIMS binding protein 3	RIMBP3	RIMS binding protein 3	RPL15	ribosomal protein L15					PAPPA2	pappalysin 2					EPHA4	EPH receptor A4			UBN1	ubinuclein 1			BCO2	beta-carotene oxygenase 2	RIC8B	RIC8 guanine nucleotide exchange factor B			IDS	iduronate 2-sulfatase	ZMIZ1	zinc finger MIZ-type containing 1	ZMYM4	zinc finger MYM-type containing 4
												RIMBP3B	RIMS binding protein 3B	RIMBP3B	RIMS binding protein 3B	AP1AR	adaptor related protein complex 1 associated regulatory protein					FBXO7	F-box protein 7					HGH1	HGH1 homolog			LHFPL5	LHFPL tetraspan subfamily member 5			MSI2	musashi RNA binding protein 2	TM4SF20	transmembrane 4 L six family member 20			HMX2	H6 family homeobox 2	ADGRF4	adhesion G protein-coupled receptor F4	TRIM32	tripartite motif containing 32
												RIMBP3C	RIMS binding protein 3C	RIMBP3C	RIMS binding protein 3C	LYRM2	LYR motif containing 2					LRAT	lecithin retinol acyltransferase					TNFRSF10B	TNF receptor superfamily member 10b			PRDM15	PR/SET domain 15			FUT9	fucosyltransferase 9	H6PD	hexose-6-phosphate dehydrogenase/glucose 1-dehydrogenase			TFAP2C	transcription factor AP-2 gamma	HMBOX1	homeobox containing 1	MAP6	microtubule associated protein 6
												TCF12	transcription factor 12	TCF12	transcription factor 12	YY1AP1	YY1 associated protein 1					XPO1	exportin 1					ALKBH6	alkB homolog 6			ROR2	receptor tyrosine kinase like orphan receptor 2			OGT	O-linked N-acetylglucosamine (GlcNAc) transferase	ATOH8	atonal bHLH transcription factor 8			UBE2E1	ubiquitin conjugating enzyme E2 E1	TMEM136	transmembrane protein 136	IPO11	importin 11
												SLC7A2	solute carrier family 7 member 2	SLC7A2	solute carrier family 7 member 2	LHPP	phospholysine phosphohistidine inorganic pyrophosphate phosphatase					USP24	ubiquitin specific peptidase 24					PRMT5	protein arginine methyltransferase 5			TP53INP1	tumor protein p53 inducible nuclear protein 1			TSPAN13	tetraspanin 13	GOSR2	golgi SNAP receptor complex member 2			RUNDC1	RUN domain containing 1	CCDC85A	coiled-coil domain containing 85A	ZSCAN2	zinc finger and SCAN domain containing 2
												MYD88	MYD88, innate immune signal transduction adaptor	MYD88	MYD88, innate immune signal transduction adaptor	HIP1	huntingtin interacting protein 1					BET1	Bet1 golgi vesicular membrane trafficking protein					SPOUT1	SPOUT domain containing methyltransferase 1			NCBP1	nuclear cap binding protein subunit 1			LSM10	LSM10, U7 small nuclear RNA associated	RPH3A	rabphilin 3A			TTC31	tetratricopeptide repeat domain 31	MYO15A	myosin XVA	IL1A	interleukin 1 alpha
												ZFP90	ZFP90 zinc finger protein	ZFP90	ZFP90 zinc finger protein	CXorf38	chromosome X open reading frame 38					DCUN1D5	defective in cullin neddylation 1 domain containing 5					AMPD3	adenosine monophosphate deaminase 3			UBA5	ubiquitin like modifier activating enzyme 5			GALNT2	polypeptide N-acetylgalactosaminyltransferase 2	LARP6	La ribonucleoprotein domain family member 6			NANOS1	nanos C2HC-type zinc finger 1	FAM107B	family with sequence similarity 107 member B	MRTFA	myocardin related transcription factor A
												TMEM104	transmembrane protein 104	TMEM104	transmembrane protein 104	B3GALT5	beta-1,3-galactosyltransferase 5					WDR36	WD repeat domain 36					PGP	phosphoglycolate phosphatase			ZNF286A	zinc finger protein 286A			VGLL3	vestigial like family member 3	ZKSCAN1	zinc finger with KRAB and SCAN domains 1			ERG	ETS transcription factor ERG	ITSN1	intersectin 1	SLC35E4	solute carrier family 35 member E4
												USP49	ubiquitin specific peptidase 49	USP49	ubiquitin specific peptidase 49	BRWD3	bromodomain and WD repeat domain containing 3					FAM234B	family with sequence similarity 234 member B					RASD2	RASD family member 2			DNAH12	dynein axonemal heavy chain 12			MAP4K3	mitogen-activated protein kinase kinase kinase kinase 3	SNX20	sorting nexin 20			SRSF11	serine and arginine rich splicing factor 11	FAM19A1	family with sequence similarity 19 member A1, C-C motif chemokine like	SYPL2	synaptophysin like 2
												AREL1	apoptosis resistant E3 ubiquitin protein ligase 1	AREL1	apoptosis resistant E3 ubiquitin protein ligase 1	PDIA6	protein disulfide isomerase family A member 6					SNAP47	synaptosome associated protein 47					SNX30	sorting nexin family member 30			GGPS1	geranylgeranyl diphosphate synthase 1			ADAM28	ADAM metallopeptidase domain 28	SLC26A6	solute carrier family 26 member 6			NKTR	natural killer cell triggering receptor	PRRG4	proline rich and Gla domain 4	LYPLA2	lysophospholipase 2
												MOV10	Mov10 RISC complex RNA helicase	MOV10	Mov10 RISC complex RNA helicase	ANKRD52	ankyrin repeat domain 52					STARD13	StAR related lipid transfer domain containing 13					PACRGL	parkin coregulated like			SATB2	SATB homeobox 2			OXR1	oxidation resistance 1	SEMA4G	semaphorin 4G			DEGS1	delta 4-desaturase, sphingolipid 1	ITGB3	integrin subunit beta 3	CA10	carbonic anhydrase 10
												PHOX2B	paired like homeobox 2B	PHOX2B	paired like homeobox 2B	QPCTL	glutaminyl-peptide cyclotransferase like					PRKAA1	protein kinase AMP-activated catalytic subunit alpha 1					NYNRIN	NYN domain and retroviral integrase containing			GRM7	glutamate metabotropic receptor 7			ENY2	ENY2, transcription and export complex 2 subunit	PDE7A	phosphodiesterase 7A			RLN2	relaxin 2	PRELID2	PRELI domain containing 2	BBS4	Bardet-Biedl syndrome 4
												GPR26	G protein-coupled receptor 26	GPR26	G protein-coupled receptor 26	MXD4	MAX dimerization protein 4					HNRNPA1	heterogeneous nuclear ribonucleoprotein A1					DTX3L	deltex E3 ubiquitin ligase 3L			RNF38	ring finger protein 38			SLC26A2	solute carrier family 26 member 2	CD2AP	CD2 associated protein			ZNF223	zinc finger protein 223	B3GALNT1	beta-1,3-N-acetylgalactosaminyltransferase 1 (globoside blood group)	PEX11B	peroxisomal biogenesis factor 11 beta
												SYN1	synapsin I	SYN1	synapsin I	NOTCH2NLA	notch 2 N-terminal like A					RICTOR	RPTOR independent companion of MTOR complex 2					SGSM1	small G protein signaling modulator 1			LRRC59	leucine rich repeat containing 59			COMMD8	COMM domain containing 8	RASD2	RASD family member 2			SUV39H2	suppressor of variegation 3-9 homolog 2	PSMF1	proteasome inhibitor subunit 1	PDE11A	phosphodiesterase 11A
												RTN1	reticulon 1	RTN1	reticulon 1	TNFRSF10B	TNF receptor superfamily member 10b					PRKCI	protein kinase C iota					FNDC3A	fibronectin type III domain containing 3A			ANP32E	acidic nuclear phosphoprotein 32 family member E			MRO	maestro	PDE3A	phosphodiesterase 3A			PTCD3	pentatricopeptide repeat domain 3	TMEM239	transmembrane protein 239	NTRK2	neurotrophic receptor tyrosine kinase 2
												MOCS1	molybdenum cofactor synthesis 1	MOCS1	molybdenum cofactor synthesis 1	PPP1R3E	protein phosphatase 1 regulatory subunit 3E					NRXN3	neurexin 3					SIPA1L3	signal induced proliferation associated 1 like 3			CNTD1	cyclin N-terminal domain containing 1			CBWD5	COBW domain containing 5	ACER2	alkaline ceramidase 2			ZNF451	zinc finger protein 451	ADH6	alcohol dehydrogenase 6 (class V)	NPHS2	NPHS2, podocin
												TMEM245	transmembrane protein 245	TMEM245	transmembrane protein 245	UGGT1	UDP-glucose glycoprotein glucosyltransferase 1					ING1	inhibitor of growth family member 1					GLT1D1	glycosyltransferase 1 domain containing 1			SCAI	suppressor of cancer cell invasion			PTBP3	polypyrimidine tract binding protein 3	SLC29A3	solute carrier family 29 member 3			AP4S1	adaptor related protein complex 4 subunit sigma 1	DACH1	dachshund family transcription factor 1	RNF165	ring finger protein 165
												EPB41L4B	erythrocyte membrane protein band 4.1 like 4B	EPB41L4B	erythrocyte membrane protein band 4.1 like 4B	ARID5B	AT-rich interaction domain 5B					TMEM106A	transmembrane protein 106A					SFXN5	sideroflexin 5			NAPB	NSF attachment protein beta			TMEM30A	transmembrane protein 30A	DTX3L	deltex E3 ubiquitin ligase 3L			HIVEP3	human immunodeficiency virus type I enhancer binding protein 3	GPN3	GPN-loop GTPase 3	SLC7A11	solute carrier family 7 member 11
												STRA6	stimulated by retinoic acid 6	STRA6	stimulated by retinoic acid 6	WIPF2	WAS/WASL interacting protein family member 2					COX7A2L	cytochrome c oxidase subunit 7A2 like					ZNF710	zinc finger protein 710			RIOX1	ribosomal oxygenase 1			SLC25A46	solute carrier family 25 member 46	PITPNM3	PITPNM family member 3			AXIN2	axin 2	GLRA3	glycine receptor alpha 3	AFF1	AF4/FMR2 family member 1
												GAD2	glutamate decarboxylase 2	GAD2	glutamate decarboxylase 2	GTF2F1	general transcription factor IIF subunit 1					CDK19	cyclin dependent kinase 19					RAB11FIP5	RAB11 family interacting protein 5			PCDHB4	protocadherin beta 4			NCAPG2	non-SMC condensin II complex subunit G2	SLC16A14	solute carrier family 16 member 14			SET	SET nuclear proto-oncogene	SAMHD1	SAM and HD domain containing deoxynucleoside triphosphate triphosphohydrolase 1	PRX	periaxin
												APOBEC3G	apolipoprotein B mRNA editing enzyme catalytic subunit 3G	APOBEC3G	apolipoprotein B mRNA editing enzyme catalytic subunit 3G	ZBTB18	zinc finger and BTB domain containing 18					TMEM74	transmembrane protein 74					TUB	tubby bipartite transcription factor			PRPF40A	pre-mRNA processing factor 40 homolog A			SLC14A1	solute carrier family 14 member 1 (Kidd blood group)	TP73	tumor protein p73			SLC12A6	solute carrier family 12 member 6	CKS2	CDC28 protein kinase regulatory subunit 2	POU3F2	POU class 3 homeobox 2
												MAP2K7	mitogen-activated protein kinase kinase 7	MAP2K7	mitogen-activated protein kinase kinase 7	ZFP82	ZFP82 zinc finger protein					MFSD4A	major facilitator superfamily domain containing 4A					PPIL3	peptidylprolyl isomerase like 3			MLLT10	MLLT10, histone lysine methyltransferase DOT1L cofactor			RPE	ribulose-5-phosphate-3-epimerase	MRPS11	mitochondrial ribosomal protein S11			ARHGEF38	Rho guanine nucleotide exchange factor 38	AKR1D1	aldo-keto reductase family 1 member D1	ZNF445	zinc finger protein 445
												KDM8	lysine demethylase 8	KDM8	lysine demethylase 8	XXYLT1	xyloside xylosyltransferase 1					ZNF22	zinc finger protein 22					DES	desmin			KIAA1109	KIAA1109			LAMP2	lysosomal associated membrane protein 2	EPHA4	EPH receptor A4			ARHGEF39	Rho guanine nucleotide exchange factor 39	MED9	mediator complex subunit 9	C18orf25	chromosome 18 open reading frame 25
												SIX5	SIX homeobox 5	SIX5	SIX homeobox 5	JPT2	Jupiter microtubule associated homolog 2					ANKRD44	ankyrin repeat domain 44					PITPNM3	PITPNM family member 3			SLC7A2	solute carrier family 7 member 2			ARNTL2	aryl hydrocarbon receptor nuclear translocator like 2	FBXW2	F-box and WD repeat domain containing 2			UGGT1	UDP-glucose glycoprotein glucosyltransferase 1	CALU	calumenin	SLC6A17	solute carrier family 6 member 17
												FRMD7	FERM domain containing 7	FRMD7	FERM domain containing 7	TXLNB	taxilin beta					SPATA46	spermatogenesis associated 46					TXNDC5	thioredoxin domain containing 5			SESTD1	SEC14 and spectrin domain containing 1			SNX30	sorting nexin family member 30	PCBD2	pterin-4 alpha-carbinolamine dehydratase 2			ADAT1	adenosine deaminase, tRNA specific 1	STAM2	signal transducing adaptor molecule 2	PTPN9	protein tyrosine phosphatase, non-receptor type 9
												SUFU	SUFU negative regulator of hedgehog signaling	SUFU	SUFU negative regulator of hedgehog signaling	RAB3B	RAB3B, member RAS oncogene family					TPM3	tropomyosin 3					RALY	RALY heterogeneous nuclear ribonucleoprotein			LRRC2	leucine rich repeat containing 2			CPNE3	copine 3	TNFRSF10B	TNF receptor superfamily member 10b			COQ10B	coenzyme Q10B	SF3B3	splicing factor 3b subunit 3	DTD2	D-tyrosyl-tRNA deacylase 2 (putative)
												GAMT	guanidinoacetate N-methyltransferase	GAMT	guanidinoacetate N-methyltransferase	GFOD2	glucose-fructose oxidoreductase domain containing 2					MINDY2	MINDY lysine 48 deubiquitinase 2					NUCKS1	nuclear casein kinase and cyclin dependent kinase substrate 1			AASS	aminoadipate-semialdehyde synthase			TMEM135	transmembrane protein 135	C5orf66	chromosome 5 open reading frame 66			LMO4	LIM domain only 4	PRSS8	serine protease 8	RCAN2	regulator of calcineurin 2
												ZNF483	zinc finger protein 483	ZNF483	zinc finger protein 483	TMEM184C	transmembrane protein 184C					SLC5A7	solute carrier family 5 member 7					FBXW2	F-box and WD repeat domain containing 2			OXR1	oxidation resistance 1			CBLN2	cerebellin 2 precursor	GLT1D1	glycosyltransferase 1 domain containing 1			SPTLC2	serine palmitoyltransferase long chain base subunit 2	MIOS	meiosis regulator for oocyte development	PAN3	poly(A) specific ribonuclease subunit PAN3
												SOX7	SRY-box 7	SOX7	SRY-box 7	TTC5	tetratricopeptide repeat domain 5					TSPYL5	TSPY like 5					TRIM8	tripartite motif containing 8			NDST3	N-deacetylase and N-sulfotransferase 3			YY2	YY2 transcription factor	HGH1	HGH1 homolog			TFDP1	transcription factor Dp-1	CASZ1	castor zinc finger 1	ZBTB46	zinc finger and BTB domain containing 46
												SPATA13	spermatogenesis associated 13	SPATA13	spermatogenesis associated 13	C3orf62	chromosome 3 open reading frame 62					ARHGAP31	Rho GTPase activating protein 31					ZNF497	zinc finger protein 497			RPL36A	ribosomal protein L36a			TMEM50A	transmembrane protein 50A	WNK3	WNK lysine deficient protein kinase 3			GIT2	GIT ArfGAP 2	ZNF281	zinc finger protein 281	KIAA0513	KIAA0513
												ZKSCAN3	zinc finger with KRAB and SCAN domains 3	ZKSCAN3	zinc finger with KRAB and SCAN domains 3	ZNF429	zinc finger protein 429					ARID1A	AT-rich interaction domain 1A					THEMIS2	thymocyte selection associated family member 2			TAOK1	TAO kinase 1			ELAVL1	ELAV like RNA binding protein 1	ALKBH6	alkB homolog 6			AASDH	aminoadipate-semialdehyde dehydrogenase	CEP70	centrosomal protein 70	CARF	calcium responsive transcription factor
												GLT1D1	glycosyltransferase 1 domain containing 1	GLT1D1	glycosyltransferase 1 domain containing 1	ATP8A2	ATPase phospholipid transporting 8A2					COG3	component of oligomeric golgi complex 3					PMS2	PMS1 homolog 2, mismatch repair system component			SLC1A2	solute carrier family 1 member 2			STX3	syntaxin 3	ZNF782	zinc finger protein 782			ABCD2	ATP binding cassette subfamily D member 2	SSBP2	single stranded DNA binding protein 2	ZMPSTE24	zinc metallopeptidase STE24
												RAB3GAP1	RAB3 GTPase activating protein catalytic subunit 1	RAB3GAP1	RAB3 GTPase activating protein catalytic subunit 1	PLCD1	phospholipase C delta 1					NBEAL1	neurobeachin like 1					ITPRID1	ITPR interacting domain containing 1			EBF2	EBF transcription factor 2			ABI3BP	ABI family member 3 binding protein	FCAMR	Fc fragment of IgA and IgM receptor			TMEM192	transmembrane protein 192	SLC35E2B	solute carrier family 35 member E2B	FLRT3	fibronectin leucine rich transmembrane protein 3
												MYH15	myosin heavy chain 15	MYH15	myosin heavy chain 15	CPNE9	copine family member 9					ATXN2	ataxin 2					SLC45A4	solute carrier family 45 member 4			NTN4	netrin 4			EIF5A2	eukaryotic translation initiation factor 5A2	PRMT5	protein arginine methyltransferase 5			NUP43	nucleoporin 43	MSS51	MSS51 mitochondrial translational activator	METAP2	methionyl aminopeptidase 2
[truncated: 579 more rows]
[truncated: 155 more columns]
