# Supplementary material for: SARS-CoV-2 putative mi-RNAs may target host immune system and cellular mechanisms to mediate pathogenesis-an in silico and in vivo study
Source: Research Square preprint supplement (doi:10.21203/rs.3.rs-6526890/v1), 2025-05-09
Supplement: Supplementary file 3 [file 699dcdb8913cd782bbc2a9ea.xlsx]

## Sheet: Hairpins
miRNA fold
S.N.	Sequence ID	Sequence	Location in genome	MFE
1	>MT358637.1_1	UGUUCUCUAAACGAACUUUAAAAUCUGUGUGGCUGUCACUCGGCUGCAUGCUUAGUGCACUCACGCAGUAUAAUUAAUAACUAAUUACUGUCGUUGACAGGACA	59-162	-28.9			Hairpins	574
3	>MT358637.1_2	UCUGUUCUCUAAACGAACUUUAAAAUCUGUGUGGCUGUCACUCGGCUGCAUGCUUAGUGCACUCACGCAGUAUAAUUAAUAACUAAUUACUGUCGUUGACAGG	57-159	-29.2			≥20kj/mol	127
5	>MT358637.1_3	AUCUGUGUGGCUGUCACUCGGCUGCAUGCUUAGUGCACUCACGCAGUAUAAUUAAUAACUAAUUACUGUCGUUGACAGGACACGAGU	81-167	-27.1			≤20kj/mol	447
7	>MT358637.1_4	AGGCUGCUUACGGUUUCGUCCGUGUUGCAGCCGAUCAUCAGCACAUCUAGGUUUUGUCCGGGUGUGACCGAAAGGUAAGAUGGAGAGCCU	186-275	-25.3
9	>MT358637.1_5	CUCGUCUAUCUUCUGCAGGCUGCUUACGGUUUCGUCCGUGUUGCAGCCGAUCAUCAGCACAUCUAGGUUUUGUCCGGGUGUGACCGAAAGGUAAGAUGGAGAG	170-272	-30.3
11	>MT358637.1_6	UGUUGCAGCCGAUCAUCAGCACAUCUAGGUUUUGUCCGGGUGUGACCGAAAGGUAAGAUGGAGAGCCUUGUCCCUGGUUUCAACG	208-292	-24
13	>MT358637.1_7	UCUAGGUUUUGUCCGGGUGUGACCGAAAGGUAAGAUGGAGAGCCUUGUCCCUGGUUUCAACGAGA	231-295	-19.6
15	>MT358637.1_8	AUGGAGAGCCUUGUCCCUGGUUUCAACGAGAAAACACACGUCCAACUCAGUUUGCCUGUUUUACAGGUUCGCGACGUGCUCGUACGUGGCUUUGGAGACUCCGU	265-368	-35.7
17	>MT358637.1_9	CUGUUUUACAGGUUCGCGACGUGCUCGUACGUGGCUUUGGAGACUCCGUGGAGGAGGUCUUAUCAGAGGCACGUCAACAUCUUAAAGAUGGCACUUGUGGCUUAG	320-424	-34.8
19	>MT358637.1_10	CAGUUUGCCUGUUUUACAGGUUCGCGACGUGCUCGUACGUGGCUUUGGAGACUCCGUGGAGGAGGUCUUAUCAGAGGCACGUCAACAUCUUAAAGAUGGCACUUG	312-416	-34
21	>MT358637.1_11	GAGGCACGUCAACAUCUUAAAGAUGGCACUUGUGGCUUAGUAGAAGUUGAAAAAGGCGUUUUGCCUC	385-451	-20.2
23	>MT358637.1_12	GUUUUGCCUCAACUUGAACAGCCCUAUGUGUUCAUCAAACGUUCGGAUGCUCGAACUGCACCUCAUGGUCAUGUUAUGGUUGAGCUGGUAGCAGAAC	442-538	-31.2
25	>MT358637.1_13	UGUGUUCAUCAAACGUUCGGAUGCUCGAACUGCACCUCAUGGUCAUGUUAUGGUUGAGCUGGUAGCAGAACUCGAAGGCAUUCAGUACGGUCGUAGUGGUGAGACA	468-573	-33
27	>MT358637.1_14	GCACCUCAUGGUCAUGUUAUGGUUGAGCUGGUAGCAGAACUCGAAGGCAUUCAGUACGGUCGUAGUGGUGAGACACUUGGUGU	499-581	-27.8
29	>MT358637.1_15	GCAUUCAGUACGGUCGUAGUGGUGAGACACUUGGUGUCCUUGUCCCUCAUGUGGGCGAAAUACCAGUGGCUUACCGCAAGGUUCUUCUUCGUAAGAACGGU	545-645	-35
31	>MT358637.1_16	UCUUCGUAAGAACGGUAAUAAAGGAGCUGGUGGCCAUAGUUACGGCGCCGAUCUAAAGUCAUUUGACUUAGGCGACGAGCUUGGCACUGAUCCUUAUGAAGA	630-731	-39.2
33	>MT358637.1_17	UCAUUUGACUUAGGCGACGAGCUUGGCACUGAUCCUUAUGAAGAUUUUCAAGAAAACUGGAACACUAAACAUAGCAGUGGUGUUACCCGUGAACUCAUGCGUGA	688-791	-25.7
35	>MT358637.1_18	ACAUAGCAGUGGUGUUACCCGUGAACUCAUGCGUGAGCUUAACGGAGGGGCAUACACUCGCUAUGU	756-821	-21.1
37	>MT358637.1_19	GAGCUUAACGGAGGGGCAUACACUCGCUAUGUCGAUAACAACUUCUGUGGCCCUGAUGGCUACCCUCUUGAGUGCAUUAAAGACCUUCUAGCACGUGCUGGUAAAGCUU	790-898	-37.7
39	>MT358637.1_20	GUGCUGGUAAAGCUUCAUGCACUUUGUCCGAACAACUGGACUUUAUUGACACUAAGAGGGGUGUAUACUGCUGCCGUGAACAUGAGCAUGAAAUUGCUUGGUAC	884-987	-33.5
41	>MT358637.1_21	GUGUAUACUGCUGCCGUGAACAUGAGCAUGAAAUUGCUUGGUACACGGAACGUUCUGAAAAGAGC	944-1008	-16.8
43	>MT358637.1_22	UUGCUUGGUACACGGAACGUUCUGAAAAGAGCUAUGAAUUGCAGACACCUUUUGAAAUUAAAUUGGCAA	977-1045	-12.7
45	>MT358637.1_23	GAAAUUAAAUUGGCAAAGAAAUUUGACACCUUCAAUGGGGAAUGUCCAAAUUUUGUAUUUCCCUUAAAUUC	1030-1100	-14.5
47	>MT358637.1_24	UUGUAUUUCCCUUAAAUUCCAUAAUCAAGACUAUUCAACCAAGGGUUGAAAAGAAAAAGCUUGAUGGCUUUAUGGGUAGAAUUCGA	1082-1167	-18.5
49	>MT358637.1_25	AGAAUUCGAUCUGUCUAUCCAGUUGCGUCACCAAAUGAAUGCAACCAAAUGUGCCUUUCAACUCUCAUGAAGUGUGAUCAUUGUGGUGAAACUUCAUGGCAGACGGGCGAUUUU	1159-1272	-34.2
51	>MT358637.1_26	CAAAUGAAUGCAACCAAAUGUGCCUUUCAACUCUCAUGAAGUGUGAUCAUUGUGGUGAAACUUCAUGGCAGACGGGCGAUUUUGUUAAAGCCACUUGCGAAUUUUG	1190-1295	-33.2
53	>MT358637.1_27	UGGCAGACGGGCGAUUUUGUUAAAGCCACUUGCGAAUUUUGUGGCACUGAGAAUUUGACUAAAGAAGGUGCCACUACUUGUGGUUACUUACCCCAAAAUGCUGUUGUUA	1255-1363	-32.5
55	>MT358637.1_28	CUACUUGUGGUUACUUACCCCAAAAUGCUGUUGUUAAAAUUUAUUGUCCAGCAUGUCACAAUUCAGAAGUAG	1328-1399	-16
57	>MT358637.1_29	AAUACCAUAAUGAAUCUGGCUUGAAAACCAUUCUUCGUAAGGGUGGUCGCACUAUUGCCUUUGGAGGCUGUGUGUUCUCUUAUGUUGGUUGCCAUAACAAGUGUGCCUAUU	1421-1531	-33.3
59	>MT358637.1_30	GCCUUUGGAGGCUGUGUGUUCUCUUAUGUUGGUUGCCAUAACAAGUGUGCCUAUUGGGUUCCACGUGCUAGCGCUAACAUAGGUUGUAACCAUACAGGUGUUGUUGGAGAAGGUUCCGAAGGU	1477-1599	-41
61	>MT358637.1_31	GGUUGCCAUAACAAGUGUGCCUAUUGGGUUCCACGUGCUAGCGCUAACAUAGGUUGUAACCAUACAGGUGUUGUUGGAGAAGGUUCCGAAGGUCUUAAUGACAACC	1507-1612	-32.7
63	>MT358637.1_32	GGUGUUGUUGGAGAAGGUUCCGAAGGUCUUAAUGACAACCUUCUUGAAAUACU	1573-1625	-16.1
65	>MT358637.1_33	GAAAUACUCCAAAAAGAGAAAGUCAACAUCAAUAUUGUUGGUGACUUUAAACUUAAUGAAGAGAUCGCCAUUAUUUUGGCAUCUUUUUCUGCUUCCACAAGUGCUUU	1618-1724	-26.5
67	>MT358637.1_34	UUAAUGAAGAGAUCGCCAUUAUUUUGGCAUCUUUUUCUGCUUCCACAAGUGCUUUUGUGGAAACUGUGAAAGGUUUGGAUUAUAAAGCAUUCAA	1670-1763	-22
69	>MT358637.1_35	CUUUUGUGGAAACUGUGAAAGGUUUGGAUUAUAAAGCAUUCAAACAAAUUGUUGAAUCCUGUGGUAAUUUUAAAGUUACAAAAG	1721-1804	-17.9
71	>MT358637.1_36	AGCAUUCAAACAAAUUGUUGAAUCCUGUGGUAAUUUUAAAGUUACAAAAGGAAAAGCUAAAAAAGGUGCCUGGAAUAUUGGUGAACAGAAAUCAAUACUGAGUCCU	1755-1860	-20
73	>MT358637.1_37	AAAGGUGCCUGGAAUAUUGGUGAACAGAAAUCAAUACUGAGUCCUCUUUAUGCAUUUGCAUCAGAGGCUGCUCGUGUUGUACGAUCAAUUUUCUCCCGCACUCUU	1816-1920	-35.1
75	>MT358637.1_38	ACAGAAAUCAAUACUGAGUCCUCUUUAUGCAUUUGCAUCAGAGGCUGCUCGUGUUGUACGAUCAAUUUUCUCCCGCACUCUUGAAACUGCUCAAAAUUCUGU	1839-1940	-31.6
77	>MT358637.1_39	AUCAAUUUUCUCCCGCACUCUUGAAACUGCUCAAAAUUCUGUGCGUGUUUUACAGAAGGCCGCUAUAACAAUACUAGAUGGAAUUUCACAGUAUUCACUGAGACUCAUUGAU	1899-2010	-28.5
79	>MT358637.1_40	GCUAUAACAAUACUAGAUGGAAUUUCACAGUAUUCACUGAGACUCAUUGAUGCUAUGAUGUUCACAUCUGAUUUGGC	1960-2036	-18.8
81	>MT358637.1_41	UAACAAUACUAGAUGGAAUUUCACAGUAUUCACUGAGACUCAUUGAUGCUAUGAUGUUCACAUCUGAUUUGGCUA	1964-2038	-16.7
83	>MT358637.1_42	UCACUGAGACUCAUUGAUGCUAUGAUGUUCACAUCUGAUUUGGCUACUAACAAUCUAGUUGUAAUGGCCUACAUUACAGGUGGUGUUGUUCAGUUGACUUCGCAGUGG	1993-2100	-30.4
85	>MT358637.1_43	UGCUAUGAUGUUCACAUCUGAUUUGGCUACUAACAAUCUAGUUGUAAUGGCCUACAUUACAGGUGGUGUUGUUCAGUUGACUUCGCAGUGGCUAACUAACAUCUUUGGCA	2010-2119	-33.4
87	>MT358637.1_44	CAAUCUAGUUGUAAUGGCCUACAUUACAGGUGGUGUUGUUCAGUUGACUUCGCAGUGGCUAACUAACAUCUUUGGCACUGUUUAUGAAAAACUCAAACCCGUCCUUGAUUG	2043-2153	-28.8
89	>MT358637.1_45	GGCCUACAUUACAGGUGGUGUUGUUCAGUUGACUUCGCAGUGGCUAACUAACAUCUUUGGCACUGUUUAUGAAAAACUCAAACCCGUCCUUGAUUGGCU	2058-2156	-25.2
91	>MT358637.1_46	UAACAUCUUUGGCACUGUUUAUGAAAAACUCAAACCCGUCCUUGAUUGGCUUGAAGAGAAGUUUAAGGAAGGUGUAGAGUUUCUUAGAGACGGUUGGGAAAUUGUUA	2106-2212	-39.6
93	>MT358637.1_47	CUUAGAGACGGUUGGGAAAUUGUUAAAUUUAUCUCAACCUGUGCUUGUGAAAUUGUCGGUGGACAAAUUGUCACCUGUGCAAAGGAAAUUAAGGAGAGUGUUCAGACAUUCUUUAAG	2188-2304	-32.2
95	>MT358637.1_48	GCUUGUGAAAUUGUCGGUGGACAAAUUGUCACCUGUGCAAAGGAAAUUAAGGAGAGUGUUCAGACAUUCUUUAAGC	2230-2305	-21.8
97	>MT358637.1_49	AUUAAGGAGAGUGUUCAGACAUUCUUUAAGCUUGUAAAUAAAUUUUUGGCUUUGUGUGCUGACUCUAUCAUUAUUGGU	2275-2352	-14.5
99	>MT358637.1_50	UUUUUGGCUUUGUGUGCUGACUCUAUCAUUAUUGGUGGAGCUAAACUUAAAGCCUUGAAUUUAGGUGAAACAUUUGUCACGCACUCAAAGGGAUUGUACAGAAA	2317-2420	-25.9
101	>MT358637.1_51	UUGUACAGAAAGUGUGUUAAAUCCAGAGAAGAAACUGGCCUACUCAUGCCUCUAAAAGCCCCAAAAGAAAUUAUCUUCUUAGAGGGAGAAACACUUCCCACAG	2410-2512	-26.9
103	>MT358637.1_52	AAAUUAUCUUCUUAGAGGGAGAAACACUUCCCACAGAAGUGUUAACAGAGGAAGUUGUCUUGAAAACUGGUGAUUU	2477-2552	-17.9
105	>MT358637.1_53	AGUUGUCUUGAAAACUGGUGAUUUACAACCAUUAGAACAACCUACUAGUGAAGCUGUUGAAGCUCCAUUGGUUGGUACACCAGUUUGUAUUAACGGGCUUAUGUUGCU	2529-2636	-32.6
107	>MT358637.1_54	UUGAAAACUGGUGAUUUACAACCAUUAGAACAACCUACUAGUGAAGCUGUUGAAGCUCCAUUGGUUGGUACACCAGUUUGUAUUAACGGGCUUAUGUUGCUCGA	2536-2639	-31
109	>MT358637.1_55	GGUACACCAGUUUGUAUUAACGGGCUUAUGUUGCUCGAAAUCAAAGACACAGAAAAGUACUGUGCC	2602-2667	-19.8
111	>MT358637.1_56	UGAUGGUAACAAACAAUACCUUCACACUCAAAGGCGGUGCACCAACAAAGGUUACUUUUGGUGAUGACACUGUGAUAGAAGUGCAAGGUUACAAGAGUGUGAAUAUCA	2681-2788	-35.5
113	>MT358637.1_57	GUGCAAGGUUACAAGAGUGUGAAUAUCACUUUUGAACUUGAUGAAAGGAUUGAUAAAGUACUUAAUGAGAAGUGCUCUGCCUAUACAGUUGAACUCGGUAC	2761-2861	-25.5
115	>MT358637.1_58	UUGAUAAAGUACUUAAUGAGAAGUGCUCUGCCUAUACAGUUGAACUCGGUACAGAAGUAAAUGAGUUCGCCUGUGUUGUGGCAGAUGCUGUCAUAAAAACUUUGCAA	2810-2916	-44.2
117	>MT358637.1_59	GUCAUAAAAACUUUGCAACCAGUAUCUGAAUUACUUACACCACUGGGCAUUGAUUUAGAUGAGUGGAGUAUGGC	2899-2972	-16.5
119	>MT358637.1_60	AAUUACUUACACCACUGGGCAUUGAUUUAGAUGAGUGGAGUAUGGCUACAUACUACUUAUUUGAUGAGUCUGGUGAGUUUAAAUU	2927-3011	-20.9
121	>MT358637.1_61	GGGCAUUGAUUUAGAUGAGUGGAGUAUGGCUACAUACUACUUAUUUGAUGAGUCUGGUGAGUUUAAAUUGGCUUCACAUAUGUAUUGUUC	2943-3032	-21.9
123	>MT358637.1_62	UUGAUGAGUCUGGUGAGUUUAAAUUGGCUUCACAUAUGUAUUGUUCUUUUUACCCUCCAGAUGAGGAUGAAGAAGAAGGUGAUUGUGAAGAAGAAGAGUUUGAGCCAUCAA	2987-3097	-32.1
125	>MT358637.1_63	UGAAGAAGAAGAGUUUGAGCCAUCAACUCAAUAUGAGUAUGGUACUGAAGAUGAUUACCAAGGUAAACCUUUGGAAUUUGGUGCCACUUCUGCUGCUCUUCA	3072-3173	-22.8
127	>MT358637.1_64	ACCAAGGUAAACCUUUGGAAUUUGGUGCCACUUCUGCUGCUCUUCAACCUGAAGAAGAGCAAGAAGAAGAUUGGUUAGAUGAUGAUAGUCAACAAACUGUUGGU	3128-3231	-33.2
129	>MT358637.1_65	AGCAAGAAGAAGAUUGGUUAGAUGAUGAUAGUCAACAAACUGUUGGUCAACAAGACGGCAGUGAGGACAAUCAGACAACUACUAUUCAAACAAUUGUU	3185-3282	-26.3
131	>MT358637.1_66	UGAGGACAAUCAGACAACUACUAUUCAAACAAUUGUUGAGGUUCAACCUCA	3246-3296	-14.5
133	>MT358637.1_67	GGACAAUCAGACAACUACUAUUCAAACAAUUGUUGAGGUUCAACCUCAAUUAGAGAUGGAACUUACACCAGUUGUUCAGACUAUUGAAGUGAAUAGUUUUAGUGGUU	3249-3355	-29.1
135	>MT358637.1_68	CUUACUGACAAUGUAUACAUUAAAAAUGCAGACAUUGUGGAAGAAGCUAAAAAGGUAAAACCAACAGUGGUUGUUAAUGCAGCCAAUGUUUACCUUAAACAUGGAG	3364-3469	-24.9
137	>MT358637.1_69	AGUGGUUGUUAAUGCAGCCAAUGUUUACCUUAAACAUGGAGGAGGUGUUGCAGGAGCCUUAAAUAAGGCUACUAACAAUGCCAUGCAAGUUGAAUCUGAUGAUUACAUAGCUACU	3429-3543	-33.7
139	>MT358637.1_70	ACAAUGCCAUGCAAGUUGAAUCUGAUGAUUACAUAGCUACUAAUGGACCACUUAAAGUGGGUGGUAGUUGUGUUUUAAGCGGACACAAUCUUGCUAAACACUGU	3503-3606	-38.6
141	>MT358637.1_71	AGUUGUGUUUUAAGCGGACACAAUCUUGCUAAACACUGUCUUCAUGUUGUCGGCCCAAAUGUUAACAAAGGUGAAGACAUUCAACUUCUUAAGAGUGCUUAUGAAAAUU	3568-3676	-34.1
143	>MT358637.1_72	UCAGCACGAAGUUCUACUUGCACCAUUAUUAUCAGCUGGUAUUUUUGGUGCUGA	3681-3734	-18.3
145	>MT358637.1_73	UUAUUAUCAGCUGGUAUUUUUGGUGCUGACCCUAUACAUUCUUUAAGAGUUUGUGUAGAUACUGUUCGCACAAAUGUCUACUUAGCUGUCUUUGAUAA	3706-3803	-28.6
147	>MT358637.1_74	CUUAGCUGUCUUUGAUAAAAAUCUCUAUGACAAACUUGUUUCAAGCUUUUUGGAAAUGAAGAGUGAAAAGCAAGUUGAACAAAAGAUCGCUGAGAUUCCUAAAGAGGAAGUUAAG	3786-3900	-37.5
149	>MT358637.1_75	UGAAAAGCAAGUUGAACAAAAGAUCGCUGAGAUUCCUAAAGAGGAAGUUAAGCCAUUUAUAACUGAAAGUAAACCUUCA	3849-3927	-20
151	>MT358637.1_76	GAUGAUAAGAAAAUCAAAGCUUGUGUUGAAGAAGUUACAACAACUCUGGAAGAAACUAAGUUCCUCACAGAAAACUUGUUACUUUAUAUUGACAUUAAUGGCAAUCUUCAUC	3946-4057	-28.2
153	>MT358637.1_77	AAUCAAAGCUUGUGUUGAAGAAGUUACAACAACUCUGGAAGAAACUAAGUUCCUCACAGAAAACUUGUUACUUUAUAUUGACAUUAAUGGCAAUCUUCAUCCAGAUU	3957-4063	-24.5
155	>MT358637.1_78	GUUACAACAACUCUGGAAGAAACUAAGUUCCUCACAGAAAACUUGUUACUUUAUAUUGACAUUAAUGGCAAUCUUCAUCCAGAUUCUGCCACUCUUGUUAGUGAC	3979-4083	-24.1
157	>MT358637.1_79	GACAUUAAUGGCAAUCUUCAUCCAGAUUCUGCCACUCUUGUUAGUGACAUUGACAUCACUUUCUUAAAGAAAGAUGCUCCAUAUAUAGUGGGUGAUGUUGUUCAAGAGGGUGUU	4036-4149	-31.5
159	>MT358637.1_80	GCCACUCUUGUUAGUGACAUUGACAUCACUUUCUUAAAGAAAGAUGCUCCAUAUAUAGUGGGUGAUGUUGUUCAAGAGGGUGUUUUAACUGCUGUGGU	4066-4163	-28.5
161	>MT358637.1_81	AGAUGCUCCAUAUAUAGUGGGUGAUGUUGUUCAAGAGGGUGUUUUAACUGCUGUGGUUAUACCUACUAAAAAGGCUGGUGGCACUACU	4107-4194	-26.3
163	>MT358637.1_82	UAACUGCUGUGGUUAUACCUACUAAAAAGGCUGGUGGCACUACUGAAAUGCUAGCGAAAGCUUUGAGAAAAGUGCCAACAGACAAUUAUAUAACCACUUA	4151-4250	-21
165	>MT358637.1_83	UACUGAAAUGCUAGCGAAAGCUUUGAGAAAAGUGCCAACAGACAAUUAUAUAACCACUUACCCGGGUCAGGGUUUAAAUGGUUACACUGUAGAGGAGGCAAAGACAGUG	4191-4299	-22.3
167	>MT358637.1_84	GGGUUUAAAUGGUUACACUGUAGAGGAGGCAAAGACAGUGCUUAAAAAGUGUAAAAGUGCCUUUUACAUUCUACCAUCUAUUAUCU	4260-4345	-24.9
169	>MT358637.1_85	GUGCCUUUUACAUUCUACCAUCUAUUAUCUCUAAUGAGAAGCAAGAAAUUCUUGGAACUGUUUCUUGGAAUUUGCGAGAAAUGCUUGCAC	4316-4405	-17.4
171	>MT358637.1_86	UGCCUUUUACAUUCUACCAUCUAUUAUCUCUAAUGAGAAGCAAGAAAUUCUUGGAACUGUUUCUUGGAAUUUGCGAGAAAUGCUUGCACAUGCAGAAGAAACACGCA	4317-4423	-21.4
173	>MT358637.1_87	AAUUUGCGAGAAAUGCUUGCACAUGCAGAAGAAACACGCAAAUU	4384-4427	-12.7
175	>MT358637.1_88	UUAAUGCCUGUCUGUGUGGAAACUAAAGCCAUAGUUUCAACUAUACAGCGUAAAUAUAAGGGUAUUAA	4426-4493	-18.1
177	>MT358637.1_89	GUGUGGAAACUAAAGCCAUAGUUUCAACUAUACAGCGUAAAUAUAAGGGUAUUAAAAUACAAGAGGGUGUGGUUGAUUAUGGUGCUAGAUUUUACUUUUACAC	4439-4541	-26.5
179	>MT358637.1_90	GGGUGUGGUUGAUUAUGGUGCUAGAUUUUACUUUUACACCAGUAAAACAACUGUAGCGUCACUUAUCAACACACUU	4503-4578	-19
181	>MT358637.1_91	GUAGCGUCACUUAUCAACACACUUAACGAUCUAAAUGAAACUCUUGUUACAAUGCCACUUGGCUAUGUAACACAUGGCUUAAAUUUGGAAGAAGCUGC	4555-4652	-19.8
183	>MT358637.1_92	GCUAUGUAACACAUGGCUUAAAUUUGGAAGAAGCUGCUCGGUAUAUGAGAUCUCUCAAAGUGCCAGCUACAGUUUCUGUUUCUUCACCUGAUGCUGUUACAGCGU	4616-4720	-31.2
185	>MT358637.1_93	UUUGGAAGAAGCUGCUCGGUAUAUGAGAUCUCUCAAAGUGCCAGCUACAGUUUCUGUUUCUUCACCUGAUGCUGUUACAGCGUAUAAUGGUUAUCUUACUUCUUCUUCUAAA	4638-4749	-34.1
187	>MT358637.1_94	CAGCGUAUAAUGGUUAUCUUACUUCUUCUUCUAAAACACCUGAAGAACAUUUUAUUGAAACCAUCUCACUUGCUG	4715-4789	-21.2
189	>MT358637.1_95	ACAUUUUAUUGAAACCAUCUCACUUGCUGGUUCCUAUAAAGAUUGGUCCUAUUCUGGACAAUCUACACAACUAGGUAUAGAAUUUCUUAAGAGAGGUGAUAAAAGUGU	4761-4868	-27.2
191	>MT358637.1_96	CUAGGUAUAGAAUUUCUUAAGAGAGGUGAUAAAAGUGUAUAUUACACUAGUAAUCCUACCACAUUCCACCUAG	4831-4903	-20.4
193	>MT358637.1_97	AUUUCUUAAGAGAGGUGAUAAAAGUGUAUAUUACACUAGUAAUCCUACCACAUUCCACCUAGAUGGUGAAGUUAUCACCUUUGACAAUCUUAAGACACUUCUUUCUUUGAGAGAAGU	4842-4958	-32.1
195	>MT358637.1_98	CUACCACAUUCCACCUAGAUGGUGAAGUUAUCACCUUUGACAAUCUUAAGACACUUCUUUCUUUGAGAGAAGUGAGGACUAUUAAGGUGUUUACAACAGUAG	4886-4987	-25.6
197	>MT358637.1_99	GACACUUCUUUCUUUGAGAGAAGUGAGGACUAUUAAGGUGUUUACAACAGUAGACAACAUUAACCUCCACACGCAAGUUGUGGACAUGUC	4935-5024	-22.7
199	>MT358637.1_100	UAGACAACAUUAACCUCCACACGCAAGUUGUGGACAUGUCAAUGACAUAUGGACAACAGUUUGGUCCAACUUAUUUGGAUGGAGCUGAUGUUACUA	4985-5080	-30.5
201	>MT358637.1_101	ACUUAUUUGGAUGGAGCUGAUGUUACUAAAAUAAAACCUCAUAAUUCACAUGAAGGUAAAACAUUUUAUGUUUUACCUAAUGAUGACACUCUACGUGUUGAGGCUUUUGAGU	5053-5164	-17.6
203	>MT358637.1_102	UGACACUCUACGUGUUGAGGCUUUUGAGUACUACCACACAACUGAUCCUAGUUUUCUGGGUAGGUACAUGUCAGCAUUAAAUCA	5136-5219	-23
205	>MT358637.1_103	GAUCCUAGUUUUCUGGGUAGGUACAUGUCAGCAUUAAAUCACACUAAAAAGUGGAAAUACCCACAAGUUAAUGGUU	5179-5254	-16.8
207	>MT358637.1_104	UAGUUUUCUGGGUAGGUACAUGUCAGCAUUAAAUCACACUAAAAAGUGGAAAUACCCACAAGUUAAUGGUUUAACUUCUAUUAAAUGGGCAGAUAACAACUG	5184-5285	-24.6
209	>MT358637.1_105	ACACUAAAAAGUGGAAAUACCCACAAGUUAAUGGUUUAACUUCUAUUAAAUGGGCAGAUAACAACUGUUAUCUUGCCACUGCAUUGU	5219-5305	-20.7
211	>MT358637.1_106	GUUAAUGGUUUAACUUCUAUUAAAUGGGCAGAUAACAACUGUUAUCUUGCCACUGCAUUGUUAACACUCCAACAAAUAGAGUUGAAGUUUAAU	5245-5337	-24.7
213	>MT358637.1_107	AGUUGAAGUUUAAUCCACCUGCUCUACAAGAUGCUUAUUACAGAGCAAGGGCUGGUGAAGCU	5324-5385	-11.5
215	>MT358637.1_108	UUAAUCCACCUGCUCUACAAGAUGCUUAUUACAGAGCAAGGGCUGGUGAAGCUGCUAACUUUUGUGCACUUAUCUUAGCCUACUGUAAUAAGACAGUAGGUGAGUUAG	5333-5440	-38.5
217	>MT358637.1_109	GGCUGGUGAAGCUGCUAACUUUUGUGCACUUAUCUUAGCCUACUGUAAUAAGACAGUAGGUGAGUUAGGUGAUGUUAGAGAAACAAUGAGUUACUUGUUUCAACAUGCC	5373-5481	-41.7
219	>MT358637.1_110	GGUGAUGUUAGAGAAACAAUGAGUUACUUGUUUCAACAUGCCAAUUUAGAUUCUUGCAAAAGAGUCUUGAACGUGGUGUGUAAAACUUGUGGACAACAGCAGACAACC	5440-5547	-27.9
221	>MT358637.1_111	GGUGUGUAAAACUUGUGGACAACAGCAGACAACCCUUAAGGGUGUAGAAGCUGUUAUGUACAUGGGCACACU	5514-5585	-28.6
223	>MT358637.1_112	GGGUGUAGAAGCUGUUAUGUACAUGGGCACACUUUCUUAUGAACAAUUUAAGAAAGGUGUUCAGAUACCUUGUACGUGUGGUAAACAAGCUACAAAAUAUCU	5553-5654	-32.4
225	>MT358637.1_113	CUAGUACAACAGGAGUCACCUUUUGUUAUGAUGUCAGCACCACCUGCUCAGUAUGAACUUAAGCAUGGUACAUUUACUUGUGCUAG	5653-5738	-26.4
227	>MT358637.1_114	AGUCACCUUUUGUUAUGAUGUCAGCACCACCUGCUCAGUAUGAACUUAAGCAUGGUACAUUUACUUGUGCUAGUGAGUACACUGGUAAUUACCAGUGUGGUCACU	5666-5770	-30
229	>MT358637.1_115	GUAUGAACUUAAGCAUGGUACAUUUACUUGUGCUAGUGAGUACACUGGUAAUUACCAGUGUGGUCACUAUAAACAUAU	5703-5780	-21.2
231	>MT358637.1_116	UUGUGCUAGUGAGUACACUGGUAAUUACCAGUGUGGUCACUAUAAACAUAUAACUUCUAAAGAAACUUUGUAUUGCAUAGACGGUGCUUUACUUACAAAGUCCUCAG	5730-5836	-23
233	>MT358637.1_117	GUACACUGGUAAUUACCAGUGUGGUCACUAUAAACAUAUAACUUCUAAAGAAACUUUGUAUUGCAUAGACGGUGCUUUACUUACAAAGUCCUCAGAAUAC	5742-5841	-21.8
235	>MT358637.1_118	UAUAAACAUAUAACUUCUAAAGAAACUUUGUAUUGCAUAGACGGUGCUUUACUUACAAAGUCCUCAGAAUACAAAGGUCCUAUUACGGAUGUUUUCUA	5770-5867	-20.6
237	>MT358637.1_119	GUCCUAUUACGGAUGUUUUCUACAAAGAAAACAGUUACACAACAACCAUAAAACCAGUUACUUAUAAAUUGGAUGGUGUUGUUUGUACAGAAAUUGACCCUAAGUUGGAC	5846-5955	-23.9
239	>MT358637.1_120	GGAUGUUUUCUACAAAGAAAACAGUUACACAACAACCAUAAAACCAGUUACUUAUAAAUUGGAUGGUGUUGUUUGUACAGAAAUUGACCCUAAGUUGGACAAUUAUU	5856-5962	-22.7
241	>MT358637.1_121	UUGGAUGGUGUUGUUUGUACAGAAAUUGACCCUAAGUUGGACAAUUAUUAUAAGAAAGACAAUUCUUAUUUCACAGAGCAACCAAUUGAUCUUGUACCAAACCAACCAUAUCCAA	5914-6028	-30.2
243	>MT358637.1_122	UCUUGUACCAAACCAACCAUAUCCAAACGCAAGCUUCGAUAAUUUUAAGUUUGUAUGUGAUAAUAUCAAAUUUGCUGAUGAUUUAAACCAGUUAACUGGUUAUAAGA	6003-6109	-21.3
245	>MT358637.1_123	UUUAAGUUUGUAUGUGAUAAUAUCAAAUUUGCUGAUGAUUUAAACCAGUUAACUGGUUAUAAGAAACCUGCUUCAAGAGAGCUUAAAGUUACAUUUUUCCCUGACUUAAA	6046-6155	-20.3
247	>MT358637.1_124	AGCUUAAAGUUACAUUUUUCCCUGACUUAAAUGGUGAUGUGGUGGCUAUUGAUUAUAAACACUACACACCCUCUUUUAAGAAAGGAGCUAAAUUGUUACAUAAACCU	6125-6231	-31
249	>MT358637.1_125	AUUGUUUGGCAUGUUAACAAUGCAACUAAUAAAGCCACGUAUAAACCAAAUACCUGGUGUAUACGUUGUCUUUGGAGCACAAAACCAGUUGAAACAUCAAAUUCGU	6232-6337	-30.8
251	>MT358637.1_126	GUCUUUGGAGCACAAAACCAGUUGAAACAUCAAAUUCGUUUGAUGUACUGAAGUCAGAGGACGCGCAGGGAAUGGAUAAUCUUGCCUGCGAAGAU	6299-6393	-19.7
253	>MT358637.1_127	ACUGAAGUCAGAGGACGCGCAGGGAAUGGAUAAUCUUGCCUGCGAAGAUCUAAAACCAGU	6345-6404	-17.4
255	>MT358637.1_128	GUCUCUGAAGAAGUAGUGGAAAAUCCUACCAUACAGAAAGACGUUCUUGAGUGUAAUGUGAAGACUACCGAAGUUGUAGGAGAC	6403-6486	-20.1
257	>MT358637.1_129	GACGUUCUUGAGUGUAAUGUGAAGACUACCGAAGUUGUAGGAGACAUUAUACUUAAACCAGCAAAUAAUAGUUUAAAAAUUACAGAAGAGGUU	6442-6534	-24.7
259	>MT358637.1_130	GGUUGGCCACACAGAUCUAAUGGCUGCUUAUGUAGACAAUUCUAGUCUUACUAUUAAGAAACCUAAUGAAUUAUCUAGAGUAUUAGGUUUGAAAACCCUUGCUACUC	6531-6637	-26.1
261	>MT358637.1_131	CCUAAUGAAUUAUCUAGAGUAUUAGGUUUGAAAACCCUUGCUACUCAUGGUUUAGCUGCUGUUAAUAGUGUCCCUUGGG	6592-6670	-18.8
263	>MT358637.1_132	AGGUUUGAAAACCCUUGCUACUCAUGGUUUAGCUGCUGUUAAUAGUGUCCCUUGGGAUACUAUAGCUAAUUAUGCUAAGCCU	6615-6696	-17.5
265	>MT358637.1_133	CAUGGUUUAGCUGCUGUUAAUAGUGUCCCUUGGGAUACUAUAGCUAAUUAUGCUAAGCCUUUUCUUAACAAAGUUGUUAGUACAACUACUAACAUAGUUACACGGUG	6637-6743	-23
267	>MT358637.1_134	CAAAGUUGUUAGUACAACUACUAACAUAGUUACACGGUGUUUAAACCGUGUUUGUACUAAUUAUAUG	6705-6771	-19.2
269	>MT358637.1_135	AGUUACACGGUGUUUAAACCGUGUUUGUACUAAUUAUAUGCCUUAUUUCUUUACUUUAUUGCUACAAUUGUGUACUUUUACUAGAAGUACAAAUUCUAGAAUU	6732-6834	-13.7
271	>MT358637.1_136	CUUUAUUGCUACAAUUGUGUACUUUUACUAGAAGUACAAAUUCUAGAAUUAAAG	6785-6838	-14.6
273	>MT358637.1_137	AAGUACAAAUUCUAGAAUUAAAGCAUCUAUGCCGACUACUAUAGCAAAGAAUACUGUUAAGAGUGUCGGUAAAUUUUGUCUAGAGGCUUCAUUU	6816-6909	-29.6
275	>MT358637.1_138	GUCGGUAAAUUUUGUCUAGAGGCUUCAUUUAAUUAUUUGAAGUCACCUAAUUUUUCUAAACUGAU	6880-6944	-18.8
277	>MT358637.1_139	ACUAUUAAGUGUUUGCCUAGGUUCUUUAAUCUACUCAACCGCUGCUUUAGGUGUUUUAAUGUCUAAUUUAGGCAUGCCUUCUUACUGUACUGGU	6966-7059	-24.8
279	>MT358637.1_140	UUAAGUGUUUGCCUAGGUUCUUUAAUCUACUCAACCGCUGCUUUAGGUGUUUUAAUGUCUAAUUUAGGCAUGCCUUCUUACUGUACUGGUUACAGAGAAGGCUAUUUGA	6970-7078	-25.4
281	>MT358637.1_141	AGUGUUUGCCUAGGUUCUUUAAUCUACUCAACCGCUGCUUUAGGUGUUUUAAUGUCUAAUUUAGGCAUGCCUUCUUACUGUACUGGUUACAGAGAAGGCUAUUUGAACU	6973-7081	-26.8
283	>MT358637.1_142	AGGUGUUUUAAUGUCUAAUUUAGGCAUGCCUUCUUACUGUACUGGUUACAGAGAAGGCUAUUUGAACUCUACUAAUGUCACUAUUGCAACCUACUGUACUGGUUCUAUACCU	7014-7125	-25.7
285	>MT358637.1_143	AGAGAAGGCUAUUUGAACUCUACUAAUGUCACUAUUGCAACCUACUGUACUGGUUCUAUACCUUGUAGUGUUUGUCUUAGUGGUUUAGAUUCUUUAGACACCUAUCCUUCUUU	7063-7175	-29.9
287	>MT358637.1_144	ACCUAUCCUUCUUUAGAAACUAUACAAAUUACCAUUUCAUCUUUUAAAUGGGAUUUAACUGCUUUUGGCUUAGUUGCAGAGUGGUUUUUGGCAUAUAUUCUUUUCACUAGGU	7162-7273	-26.1
289	>MT358637.1_145	GUUGCAGAGUGGUUUUUGGCAUAUAUUCUUUUCACUAGGUUUUUCUAUGUACUUGGAUUGGCUGCAAU	7234-7301	-17
291	>MT358637.1_146	CAUAUAUUCUUUUCACUAGGUUUUUCUAUGUACUUGGAUUGGCUGCAAUCAUGCAAUUGUUUUUCAGCUAUUUUGCAGUACAUUUUAUUAGUAAUUCUUGGCUUAUGUG	7253-7361	-27.6
293	>MT358637.1_147	GUACAUUUUAUUAGUAAUUCUUGGCUUAUGUGGUUAAUAAUUAAUCUUGUACAAAUGGCCCCGAUUUCAGCUAUGGUUAGAAUGUAC	7330-7416	-24.4
295	>MT358637.1_148	UGGCCCCGAUUUCAGCUAUGGUUAGAAUGUACAUCUUCUUUGCAUCAUUUUAUUAUGUAUGGAAAAGUUAUGUGCAUGUUGUAGACGGUUGUAAUUCAUCA	7385-7485	-29.8
297	>MT358637.1_149	UAUGGAAAAGUUAUGUGCAUGUUGUAGACGGUUGUAAUUCAUCAACUUGUAUGAUGUGUUACAAACGUAAUAGAGCAACAAGAGUCGAAUGUACAACUAUUGUUAAUG	7442-7549	-29.9
299	>MT358637.1_150	GCAUGUUGUAGACGGUUGUAAUUCAUCAACUUGUAUGAUGUGUUACAAACGUAAUAGAGCAACAAGAGUCGAAUGUACAACUAUUGUUAAUGGUGU	7458-7553	-29.3
301	>MT358637.1_151	GAAUGUACAACUAUUGUUAAUGGUGUUAGAAGGUCCUUUUAUGUCUAUGCUAAUGGAGGUAAAGGCUUUUGCAAACUACACAAUUGGAAUUGUGUUAAUUGUGAUACAUUC	7528-7638	-28.7
303	>MT358637.1_152	GGUAAAGGCUUUUGCAAACUACACAAUUGGAAUUGUGUUAAUUGUGAUACAUUCUGUGCUGGUAGUACAUUUAUUAGUGAUGAAGUUGCGAGAGACUUGUCACU	7585-7688	-25.4
305	>MT358637.1_153	CUGGUAGUACAUUUAUUAGUGAUGAAGUUGCGAGAGACUUGUCACUACAGUUUAAAAGACCAAUAAAUCCUACUGACCAGUCUUCUUACAUCGUUGAUAGUGUUACAG	7643-7750	-31.9
307	>MT358637.1_154	AGUCUUCUUACAUCGUUGAUAGUGUUACAGUGAAGAAUGGUUCCAUCCAUCUUUACUUUGAUAAAGCUGGUCAAAAGACU	7721-7800	-21.7
309	>MT358637.1_155	GUCUUCUUACAUCGUUGAUAGUGUUACAGUGAAGAAUGGUUCCAUCCAUCUUUACUUUGAUAAAGCUGGUCAAAAGACUUAUGAAAGAC	7722-7810	-23.1
311	>MT358637.1_156	UGAUAAAGCUGGUCAAAAGACUUAUGAAAGACAUUCUCUCUCUCAUUUUGUUAACUUAGACAACCUGAGAGCUAAUAACACUAAAGGUUCAUUGCCUAUUAAUGUUA	7779-7885	-31.3
313	>MT358637.1_157	ACCUGAGAGCUAAUAACACUAAAGGUUCAUUGCCUAUUAAUGUUAUAGUUUUUGAUGGU	7841-7899	-18.5
315	>MT358637.1_158	AGGUUCAUUGCCUAUUAAUGUUAUAGUUUUUGAUGGUAAAUCAAAAUGUGAAGAAUCAUCUGCAAAAUCAGCGUCUGUUUACUACAGUCAGCUUAUGUGUCAACCU	7863-7968	-21.8
317	>MT358637.1_159	AAUCAUCUGCAAAAUCAGCGUCUGUUUACUACAGUCAGCUUAUGUGUCAACCUAUACUGUUACUAGAUCAGGCAUUAGUGUCUGAUGUUGGUGAUAGUGCGGAAGUU	7916-8022	-31.9
319	>MT358637.1_160	AUUAGUGUCUGAUGUUGGUGAUAGUGCGGAAGUUGCAGUUAAAAUGUUUGAUGCUUACGUUAAUACGUUUUCAUCAACUUUUAACGUACCAAUGGAAAAACUCAAAACACUAGU	7989-8102	-37.2
321	>MT358637.1_161	GGAAAAACUCAAAACACUAGUUGCAACUGCAGAAGCUGAACUUGCAAAGAAUGUGUCCUUAGACAAUGUCU	8082-8152	-16.7
323	>MT358637.1_162	AAGAAUGUGUCCUUAGACAAUGUCUUAUCUACUUUUAUUUCAGCAGCUCGGCAAGGGUUUGUUGAUUCAGAUGUAGAAACUAAAGAUGUUGUUGAAUGUCUU	8128-8229	-30.3
325	>MT358637.1_163	UGUUGAUUCAGAUGUAGAAACUAAAGAUGUUGUUGAAUGUCUUAAAUUGUCACAUCAAUCUGACA	8187-8251	-15.5
327	>MT358637.1_164	AAUGUCUUAAAUUGUCACAUCAAUCUGACAUAGAAGUUACUGGCGAUAGUUGUAAUAACUAUAUGCUCACCUAUAACAAAGUUGAAAACAUGACACCCCGUGACCUU	8222-8328	-25.9
329	>MT358637.1_165	CUAUAACAAAGUUGAAAACAUGACACCCCGUGACCUUGGUGCUUGUAUUGACUGUAGUGCGCGUCAUAUUAAUGCGCAGGUAGCAAAAAGUCACAACAUUGCUUUGAUAUGG	8292-8403	-30.9
331	>MT358637.1_166	UGACUGUAGUGCGCGUCAUAUUAAUGCGCAGGUAGCAAAAAGUCACAACAUUGCUUUGAUAUGGAACGUUAAAGAUUUCAUGUCA	8340-8424	-21.4
333	>MT358637.1_167	AGUGCUGCUAAAAAGAAUAACUUACCUUUUAAGUUGACAUGUGCAACUACUAGACAAGUUGUUAAUGUUGUAACAACAAAGAUAGCACUUAAGGGUGGUAAAAUU	8455-8559	-25.2
335	>MT358637.1_168	UAACUUACCUUUUAAGUUGACAUGUGCAACUACUAGACAAGUUGUUAAUGUUGUAACAACAAAGAUAGCACUUAAGGGUGGUAAAAUUGUUAAUAAUUGGUUGAAGCAGUUA	8472-8583	-30.1
337	>MT358637.1_169	GGGUGGUAAAAUUGUUAAUAAUUGGUUGAAGCAGUUAAUUAAAGUUACACUUGUGUUCCUUUUUGUUGCUGCUAUUUUCUAUUUAAUAACACCU	8547-8640	-27.3
339	>MT358637.1_170	UGCUAUUUUCUAUUUAAUAACACCUGUUCAUGUCAUGUCUAAACAUACUGACUUUUCAAGUGAAAUCAUAGGAUACAAGGCUAUUGAUGGUGGUGUCACUCGUGACAUAGCA	8616-8727	-28.1
341	>MT358637.1_171	UGUCUAAACAUACUGACUUUUCAAGUGAAAUCAUAGGAUACAAGGCUAUUGAUGGUGGUGUCACUCGUGACAUAGCAUCUACAGAUA	8651-8737	-23.9
343	>MT358637.1_172	GUGUCACUCGUGACAUAGCAUCUACAGAUACUUGUUUUGCUAACAAACAUGCUGAUUUUGACAC	8708-8771	-16.8
345	>MT358637.1_173	UGUCACUCGUGACAUAGCAUCUACAGAUACUUGUUUUGCUAACAAACAUGCUGAUUUUGACACAUGGUUUAGCCAGCGUGGUGGUAGUUAUACUAAUGACA	8709-8809	-26.4
347	>MT358637.1_174	CUUGUUUUGCUAACAAACAUGCUGAUUUUGACACAUGGUUUAGCCAGCGUGGUGGUAGUUAUACUAAUGACAAAGCUUGCCCAUUGAUUGCUGCAGUCAUAACAAG	8738-8843	-27.5
349	>MT358637.1_175	GAUUGCUGCAGUCAUAACAAGAGAAGUGGGUUUUGUCGUGCCUGGUUUGCCUGGCACGAUAUUACGCACAACUAAUGGUGACUUUUUGCAUUUC	8823-8916	-40.1
351	>MT358637.1_176	UUGCAUUUCUUACCUAGAGUUUUUAGUGCAGUUGGUAACAUCUGUUACACACCAUCAAAACUUAUAGAGUACACUGACUUUGCAA	8908-8992	-17.7
353	>MT358637.1_177	AGAGUUUUUAGUGCAGUUGGUAACAUCUGUUACACACCAUCAAAACUUAUAGAGUACACUGACUUUGCAACAUCAGCUUGUGUUUUGGCUGCUGAAUGUACAAUUUU	8923-9029	-23.9
355	>MT358637.1_178	CUUAUAGAGUACACUGACUUUGCAACAUCAGCUUGUGUUUUGGCUGCUGAAUGUACAAUUUUUAAAGAUGCUUCUGGUAAG	8968-9048	-22.7
357	>MT358637.1_179	GGCUGCUGAAUGUACAAUUUUUAAAGAUGCUUCUGGUAAGCCAGUACCAUAUUGUUAUGAUACCAAUGUACUAGAAGGUUCUGUUGCUUAUGAAAGUUUACGCCC	9009-9113	-28.4
359	>MT358637.1_180	GUGUUUUGGCUGCUGAAUGUACAAUUUUUAAAGAUGCUUCUGGUAAGCCAGUACCAUAUUGUUAUGAUACCAAUGUACUAGAAGGUUCUGUUGCUUAUGAAAGUUUACGC	9002-9111	-30.5
361	>MT358637.1_181	AAGGUUCUGUUGCUUAUGAAAGUUUACGCCCUGACACACGUUAUGUGCUCAUGGAUGGCUCUAUUAUUCAAUUUCCUAACACCUACCUU	9083-9171	-23.6
363	>MT358637.1_182	AUGAAAGUUUACGCCCUGACACACGUUAUGUGCUCAUGGAUGGCUCUAUUAUUCAAUUUCCUAACACCUACCUUGAAGGUUCUGUUAGAGUGGUAACAACUUUUGAU	9098-9204	-24.3
365	>MT358637.1_183	UGUGCUCAUGGAUGGCUCUAUUAUUCAAUUUCCUAACACCUACCUUGAAGGUUCUGUUAGAGUGGUAACAACUUUUGAUUCUGAGUACUGUAGGCACG	9126-9223	-24.6
367	>MT358637.1_184	AGUGGUAACAACUUUUGAUUCUGAGUACUGUAGGCACGGCACUUGUGAAAGAUCAGAAGCUGGUGUUUGUGUAUCUACU	9186-9264	-19.6
369	>MT358637.1_185	ACGGCACUUGUGAAAGAUCAGAAGCUGGUGUUUGUGUAUCUACUAGUGGUAGAUGGGUACUUAACAAUGAUUAUUACAGAUCUUUACCAGGAGUUUUCUGUGGUGUAGAUGCUGU	9221-9335	-34.1
371	>MT358637.1_186	UAGUGGUAGAUGGGUACUUAACAAUGAUUAUUACAGAUCUUUACCAGGAGUUUUCUGUGGUGUAGAUGCUGUAAAUUUACUUACUAAUAUGUUUACACCACUA	9264-9366	-32.7
373	>MT358637.1_187	UCUUUACCAGGAGUUUUCUGUGGUGUAGAUGCUGUAAAUUUACUUACUAAUAUGUUUACACCACUAAUUCAACCUAUUGGUGCUUUGGA	9301-9389	-27.7
375	>MT358637.1_188	UUACCAGGAGUUUUCUGUGGUGUAGAUGCUGUAAAUUUACUUACUAAUAUGUUUACACCACUAAUUCAACCUAUUGGUGCUUUGGACAUAUCAGCAUCUAUAGUAGCUGGUGG	9304-9416	-35.8
377	>MT358637.1_189	CUAAUUCAACCUAUUGGUGCUUUGGACAUAUCAGCAUCUAUAGUAGCUGGUGGUAUUGUAGCUAUCGUAGUAACAUGCCUUGCCUACUAUUUUAUGAGGUUUAGAAG	9364-9470	-21.4
379	>MT358637.1_190	AACAUGCCUUGCCUACUAUUUUAUGAGGUUUAGAAGAGCUUUUGGUGAAUACAGUCAUGUAGUUGCCUUUAAUACUUUACUAUUCCUUAUGUCAUUCACUGUACUCUGUU	9435-9544	-23.9
381	>MT358637.1_191	AUGAGGUUUAGAAGAGCUUUUGGUGAAUACAGUCAUGUAGUUGCCUUUAAUACUUUACUAUUCCUUAUGUCAUUCACUGUACUCUGUUUAACACCAGU	9457-9554	-21
383	>MT358637.1_192	UGUCAUUCACUGUACUCUGUUUAACACCAGUUUACUCAUUCUUACCUGGUGUUUAUUCUGUUAUUUACUUGUACUUGACA	9524-9603	-22.4
385	>MT358637.1_193	UACUAAUGAUGUUUCUUUUUUAGCACAUAUUCAGUGGAUGGUUAUGUUCACACCUUUAGUACCUUUCUGGAUAACAAUUGCUUAUAUCAUUUGUA	9612-9706	-26.2
387	>MT358637.1_194	GCUUAUAUCAUUUGUAUUUCCACAAAGCAUUUCUAUUGGUUCUUUAGUAAUUACCUAAAGAGACGUGUAGUCUUUAAUGGUGUUUCCUUUAGUACUUUUGAAGAAGC	9691-9797	-28.3
389	>MT358637.1_195	UUUGUUAAAUAAAGAAAUGUAUCUAAAGUUGCGUAGUGAUGUGCUAUUACCUCUUACGCAAUAUAAUAGAUACUUAGCUCUUUAUAAUAAGUACAAG	9813-9909	-32.6
391	>MT358637.1_196	UCUUACGCAAUAUAAUAGAUACUUAGCUCUUUAUAAUAAGUACAAGUAUUUUAGUGGAGCAAUGGAUACAACUAGCUACAGAGAAGCUGCUUGUUGUCAUCUCGCAAAGG	9864-9973	-24.1
393	>MT358637.1_197	GGAGCAAUGGAUACAACUAGCUACAGAGAAGCUGCUUGUUGUCAUCUCGCAAAGGCUCU	9919-9977	-17.7
395	>MT358637.1_198	CUUCAGUAACUCAGGUUCUGAUGUUCUUUACCAACCACCACAAACCUCUAUCACCUCAGCUGUUUUGCAGAGUGGUUUUAGAAAAAUGGCAUUCCCAUCUGGUAAAGUUGAGG	9984-10096	-31.2
397	>MT358637.1_199	ACCACAAACCUCUAUCACCUCAGCUGUUUUGCAGAGUGGUUUUAGAAAAAUGGCAUUCCCAUCUGGUAAAGUUGAGGGUUGUAUGGUACAAGUAACUUGUGGU	10020-10122	-27.6
399	>MT358637.1_200	AGGGUUGUAUGGUACAAGUAACUUGUGGUACAACUACACUUAACGGUCUUUGGCUUGAUGACGUAGUUUACUGUCCAAGACAUGUGAUCUGCACCUCUGAAGACAUGCUUAACCCU	10094-10209	-33.9
401	>MT358637.1_201	CUCUGAAGACAUGCUUAACCCUAAUUAUGAAGAUUUACUCAUUCGUAAGUCUAAUCAUAAUUUCUUGGUACAGGCUGGUAAUGUUCAACUCAGGG	10188-10282	-26.4
403	>MT358637.1_202	AGACAUGCUUAACCCUAAUUAUGAAGAUUUACUCAUUCGUAAGUCUAAUCAUAAUUUCUUGGUACAGGCUGGUAAUGUUCAACUCAGGGUUAUUGGACAUUCU	10194-10296	-30
405	>MT358637.1_203	UAAUUUCUUGGUACAGGCUGGUAAUGUUCAACUCAGGGUUAUUGGACAUUCUAUGCAAAAUUGUGUACUUAAGCUUAAGGUUG	10245-10327	-21.2
407	>MT358637.1_204	UGGACAUUCUAUGCAAAAUUGUGUACUUAAGCUUAAGGUUGAUACAGCCAAUCCUAAGACACCUAAGUAUAAGUUUGUUCG	10287-10367	-20.8
409	>MT358637.1_205	AGCCAAUCCUAAGACACCUAAGUAUAAGUUUGUUCGCAUUCAACCAGGACAGACUUUUUCAGUGUUAGCUUGUUACAAUGGUU	10332-10414	-23.4
411	>MT358637.1_206	UCACCAUCUGGUGUUUACCAAUGUGCUAUGAGGCCCAAUUUCACUAUUAAGGGUUCAUUCCUUAAUGGUUCAUGUGGUAGUGUUGGUUUUAACAUAGAUUAUGA	10414-10517	-35.8
413	>MT358637.1_207	GGUUCAUUCCUUAAUGGUUCAUGUGGUAGUGUUGGUUUUAACAUAGAUUAUGACUGUGUCUCUUUUUGUUACAUGCACCAUAUGGAAUUACCAACUGGAGUUCAUGCU	10465-10572	-29.1
415	>MT358637.1_208	UUAUGACUGUGUCUCUUUUUGUUACAUGCACCAUAUGGAAUUACCAACUGGAGUUCAUGCUGGCACAGACUUAG	10512-10585	-21
417	>MT358637.1_209	UGUCUCUUUUUGUUACAUGCACCAUAUGGAAUUACCAACUGGAGUUCAUGCUGGCACAGACUUAGAAGGUAACUUUUAUGGACCUUUUGUUGACAGGCA
419	>MT358637.1_210	GGACCUUUUGUUGACAGGCAAACAGCACAAGCAGCUGGUACGGACACAACUAUUACAGUUAAUGUUUUAGCUUGGUUGUACGCUGCUGUUAUAAAUGGAGACAGGUGGUUU	10600-10710	-35.5
421	>MT358637.1_211	UGUUAUAAAUGGAGACAGGUGGUUUCUCAAUCGAUUUACCACAACUCUUAAUGACUUUAACCUUGUGGCUAUGAAGUACAAUUAUGAACCUCUAACACAAGACCAUGUUGACA	10686-10798	-25.5
423	>MT358637.1_212	AUGAAGUACAAUUAUGAACCUCUAACACAAGACCAUGUUGACAUACUAGGACCUCUUUCUGCUCAAACUGGAAUUGCCGUUUUAGAUAUGUGUGCUUCAU	10756-10855	-31.8
425	>MT358637.1_213	UUAGAUAUGUGUGCUUCAUUAAAAGAAUUACUGCAAAAUGGUAUGAAUGGACGUACCAUAUUGGGUAGUGCUUUAUUAGAAGAUGAAUUUACACCUUUUGA	10837-10937	-34.9
427	>MT358637.1_214	GACAAUGCUCAGGUGUUACUUUCCAAAGUGCAGUGAAAAGAACAAUCAAGGGUACACACCACUGGUUGUUACUCACAAUUUUGACUUCACUUUUAGUUUUAGUC	10946-11049	-32.8
429	>MT358637.1_215	GUGCAGUGAAAAGAACAAUCAAGGGUACACACCACUGGUUGUUACUCACAAUUUUGACUUCACUUUUAGUUUUAGUCCAGAGUACUCAAUGGUCUUUGUUCUUUUUUUUGUAU	10973-11085	-36.3
431	>MT358637.1_216	GUAUGAAAAUGCCUUUUUACCUUUUGCUAUGGGUAUUAUUGCUAUGUCUGC	11082-11132	-12
433	>MT358637.1_217	GCUAUGUCUGCUUUUGCAAUGAUGUUUGUCAAACAUAAGCAUGCAUUUCUCUGUUUGUUUUUGUUACCUUCUCUUGCCACUGUAGCUUAUUUUAAUAUGGU	11122-11222	-26.3
435	>MT358637.1_218	UGUUUGUCAAACAUAAGCAUGCAUUUCUCUGUUUGUUUUUGUUACCUUCUCUUGCCACUGUAGCUUAUUUUAAUAUGGUCUAUAUGCCUGCUAGUUGGGUGAUGCG	11144-11249	-24.1
437	>MT358637.1_219	CUGCUAGUUGGGUGAUGCGUAUUAUGACAUGGUUGGAUAUGGUUGAUACUAGUUUGUCUGGUUUUAAGCUAAAAGACUGUGUUAUGUAUGCAUCAGCUGUAG	11231-11332	-37.5
439	>MT358637.1_220	UUGUCUGGUUUUAAGCUAAAAGACUGUGUUAUGUAUGCAUCAGCUGUAGUGUUACUAAUCCUUAUGACAG	11284-11353	-17.3
441	>MT358637.1_221	GUCUGGUUUUAAGCUAAAAGACUGUGUUAUGUAUGCAUCAGCUGUAGUGUUACUAAUCCUUAUGACAGCAAGAACUGUGUAUGAUGAUGGUGCUAGGAGAGUGUGGAC	11286-11393	-26.9
443	>MT358637.1_222	AGUGUUACUAAUCCUUAUGACAGCAAGAACUGUGUAUGAUGAUGGUGCUAGGAGAGUGUGGACACU	11331-11396	-17.1
445	>MT358637.1_223	ACACUUAUGAAUGUCUUGACACUCGUUUAUAAAGUUUAUUAUGGUAAUGCUUUAGAUCAAGCCAUUUCCAUGUGGGCUCUUAUAAUCUCUGUUACUUCUAACUACUCAGGUGU	11392-11504	-27.1
447	>MT358637.1_224	UCAAGCCAUUUCCAUGUGGGCUCUUAUAAUCUCUGUUACUUCUAACUACUCAGGUGUAGUUACAACUGUCAUGUUUUUGGCCAGAGGUAUUGUUUUUAUGUGUGUUGA	11448-11555	-27
449	>MT358637.1_225	GCUCUUAUAAUCUCUGUUACUUCUAACUACUCAGGUGUAGUUACAACUGUCAUGUUUUUGGCCAGAGGUAUUGUUUUUAUGUGUGUUGAGU	11467-11557	-22.8
451	>MT358637.1_226	UUAUGUGUGUUGAGUAUUGCCCUAUUUUCUUCAUAACUGGUAAUACACUUCAGUGUAUAAUGCUAGUUUAUUGUUUCUUAGGCUAUUUUUGUACUUGUUACUUUGG	11543-11648	-22.6
453	>MT358637.1_227	ACACUUCAGUGUAUAAUGCUAGUUUAUUGUUUCUUAGGCUAUUUUUGUACUUGUUACUUUGGCCUCUUUUGUUUACUCAACCGCUACUUUAGACUGACUCUUGGUGU	11587-11693	-25.1
455	>MT358637.1_228	UAUAUGAAUUCACAGGGACUACUCCCACCCAAGAAUAGCAUAGAUGCCUUCAAACUCAACAUUAAAUUGUUGGGUGUUGGUGGCAAACCUUGUAUCAAAGUA	11728-11829	-28.3
457	>MT358637.1_229	AUUCACAGGGACUACUCCCACCCAAGAAUAGCAUAGAUGCCUUCAAACUCAACAUUAAAUUGUUGGGUGUUGGUGGCAAACCUUGUAUCAAAGUAGCCACUGUACAGU	11735-11842	-34
459	>MT358637.1_230	UGGUGGCAAACCUUGUAUCAAAGUAGCCACUGUACAGUCUAAAAUGUCAGAUGUAAAGUGCACAUCAGUAGUCUUACUCUCAGUUUUGCAACAACUCAGAGUAGAAUCAUCA	11805-11916	-25.4
461	>MT358637.1_231	AGUGCACAUCAGUAGUCUUACUCUCAGUUUUGCAACAACUCAGAGUAGAAUCAUCAUCUAAAUUGUGGGCU	11861-11931	-19.6
463	>MT358637.1_232	AGAGUAGAAUCAUCAUCUAAAUUGUGGGCUCAAUGUGUCCAGUUACACAAUGACAUUCUCUUAGCUAAAGAUACUACUGAAGCCUUUGAAAAAAUGGUUUCACUACUUU	11902-12010	-29.8
465	>MT358637.1_233	GUCCAGUUACACAAUGACAUUCUCUUAGCUAAAGAUACUACUGAAGCCUUUGAAAAAAUGGUUUCACUACUUUCUGUUUUGCUUUCCAUGCAGGGUGCUGUAGACAU	11938-12044	-28.4
467	>MT358637.1_234	UUCACUACUUUCUGUUUUGCUUUCCAUGCAGGGUGCUGUAGACAUAAACAAGCUUUGUGAA	12000-12060	-15.1
469	>MT358637.1_235	GCUUUCCAUGCAGGGUGCUGUAGACAUAAACAAGCUUUGUGAAGAAAUGCUGGACAACAGGGCAACCUUACAAGCUAUAGCCUCAGAGUUUAGU	12018-12111	-20.4
471	>MT358637.1_236	AAGCUAUAGCCUCAGAGUUUAGUUCCCUUCCAUCAUAUGCAGCUUUUGCUACUGCUCAAGAAGCUUAUGAGCAGGCUGUUGCUAAUGGUGAUUCUGAAGUUGUUCUU	12089-12195	-36
473	>MT358637.1_237	AGUCUUUGAAUGUGGCUAAAUCUGAAUUUGACCGUGAUGCAGCCAUGCAACGUAAGUUGGAAAAGAUGGCUGAUCAAGCUAUGACCCAAAUGUAUAAACAGGCU	12209-12312	-27
475	>MT358637.1_238	UGUAUAAACAGGCUAGAUCUGAGGACAAGAGGGCAAAAGUUACUAGUGCUAUGCAGACAAUGCUUUUCACUAUGCUUAGAAAGUUGGAUAAUGAUGCA	12299-12396	-26.3
477	>MT358637.1_239	UGCUUAGAAAGUUGGAUAAUGAUGCACUCAACAACAUUAUCAACAAUGCAAGAGAUGGUUGUGUUCCCUUGAACAUAAUACCUCUUACAACAGCA	12371-12465	-22.9
479	>MT358637.1_240	UAUCAACAAUGCAAGAGAUGGUUGUGUUCCCUUGAACAUAAUACCUCUUACAACAGCAGCCAAACUAAUGGUUGUCAUA	12408-12486	-17.8
481	>MT358637.1_241	AUACCUCUUACAACAGCAGCCAAACUAAUGGUUGUCAUACCAGACUAU	12448-12495	-13.6
483	>MT358637.1_242	UCUUACAACAGCAGCCAAACUAAUGGUUGUCAUACCAGACUAUAACACAUAUAAAAAUACGUGUGAUGGUACAACAUUUACUUAUGCAUCAGCAUUGUGGGA	12453-12554	-25.6
485	>MT358637.1_243	CAUAUAAAAAUACGUGUGAUGGUACAACAUUUACUUAUGCAUCAGCAUUGUGGGAAAUCCAACAGGUUGUAGAUGCAGAUAGUAAAAUUGUUCAACUUAGUGAAAUUAGUAUG	12500-12612	-33.9
487	>MT358637.1_244	UAGCAUGGCCUCUUAUUGUAACAGCUUUAAGGGCCAAUUCUGCUG	12629-12673	-12.6
489	>MT358637.1_245	AGCAUGGCCUCUUAUUGUAACAGCUUUAAGGGCCAAUUCUGCUGUCAAAUUACAGAAUAAUGAGCUUAGUCCUGUUGCACUACGACAGAUGUCUUGUGCU	12630-12729	-32.4
491	>MT358637.1_246	UAGUCCUGUUGCACUACGACAGAUGUCUUGUGCUGCCGGUACUACACAAACUGCUUGCACUGAUGACAAUGCGUUAGCUUACUA	12696-12779	-23.5
493	>MT358637.1_247	UGCCGGUACUACACAAACUGCUUGCACUGAUGACAAUGCGUUAGCUUACUACAACACAACAAAGGGAGGUAGGUUUGUACUUGCA	12729-12813	-22.5
495	>MT358637.1_248	CUACACAAACUGCUUGCACUGAUGACAAUGCGUUAGCUUACUACAACACAACAAAGGGAGGUAGGUUUGUACUUGCACUGUUAUCCGAUUUACAGGAUUUGAAAUGG	12737-12843	-29.2
497	>MT358637.1_249	ACUUGCACUGUUAUCCGAUUUACAGGAUUUGAAAUGGGCUAGAUUCCCUAAGAGUGAUGGAACUGGUACUAUCUAUACAGAACUGGAACCACCUUGUAGGU	12807-12907	-29.4
499	>MT358637.1_250	AGACACACCUAAAGGUCCUAAAGUGAAGUAUUUAUACUUUAUUAAAGGAUUAAACAACCUAAAUAGAGGUAUGGUACUUGGUAGUUUAGCUGCCACAGUACGUCU	12915-13019	-30.7
501	>MT358637.1_251	UACUUUAUUAAAGGAUUAAACAACCUAAAUAGAGGUAUGGUACUUGGUAGUUUAGCUGCCACAGUACGUCUACAAGCUGGUAAUGCAACAGAAGUG	12949-13044	-26.1
503	>MT358637.1_252	GUUUAGCUGCCACAGUACGUCUACAAGCUGGUAAUGCAACAGAAGUGCCUGCCAAUUCAACUGUAUUAUCUUUCUGUGCUUUUGCUGUAGAUGCUGCUAAAGCUUAC	12998-13104	-33.5
505	>MT358637.1_253	UUGCUGUAGAUGCUGCUAAAGCUUACAAAGAUUAUCUAGCUAGUGGGGGACAACCAAUCACUAAUUGUGUUAAGAUGUUGUGUACACACACUGGUACUGGUCAGGCAA	13079-13186	-30.4
507	>MT358637.1_254	GCUGCUAAAGCUUACAAAGAUUAUCUAGCUAGUGGGGGACAACCAAUCACUAAUUGUGUUAAGAUGUUGUGUACACACACUGGUACUGGUCAGGCAAUAACAGU	13090-13193	-29.3
509	>MT358637.1_255	UGUGUACACACACUGGUACUGGUCAGGCAAUAACAGUUACACCGGAAGCCAAUAUGGAUCAAGAAUCCUUUGGUGGUGCAUCGUGUUGUCUGUACUGCCGUUGCCACAUA	13157-13266	-36.7
511	>MT358637.1_256	UGGUACUGGUCAGGCAAUAACAGUUACACCGGAAGCCAAUAUGGAUCAAGAAUCCUUUGGUGGUGCAUCGUGUUGUCUGUACUGCCGUUGCCACAUAGAUCAUCCA	13170-13275	-34.4
513	>MT358637.1_257	GCAUCGUGUUGUCUGUACUGCCGUUGCCACAUAGAUCAUCCAAAUCCUAAAGGAUUUUGUGACUUAAAAGGUAAGUAUGUACAAAUACCUACAACUUGUGC	13234-13334	-33.3
515	>MT358637.1_258	CAAAUACCUACAACUUGUGCUAAUGACCCUGUGGGUUUUACACUUAAAAACACAGUCUGUACCGUCUGCGGUAUGUG	13315-13391	-19.1
517	>MT358637.1_259	ACCUACAACUUGUGCUAAUGACCCUGUGGGUUUUACACUUAAAAACACAGUCUGUACCGUCUGCGGUAUGUGGAAAGGU	13320-13398	-19.8
519	>MT358637.1_260	UACAACUUGUGCUAAUGACCCUGUGGGUUUUACACUUAAAAACACAGUCUGUACCGUCUGCGGUAUGUGGAAAGGUUAUGGCUGUAGUUGUG	13323-13414	-24.9
521	>MT358637.1_261	GGCUGUAGUUGUGAUCAACUCCGCGAACCCAUGCUUCAGUCAGCUGAUGCACAAUCGUUUUUAAACGGGUUUGCGGUGUAAGUGCAGCC	13402-13490	-35.7
523	>MT358637.1_262	GUCAGCUGAUGCACAAUCGUUUUUAAACGGGUUUGCGGUGUAAGUGCAGCCCGUCUUACACCGUGCGGCACAGGCACUAGUACUGAUGUCGUAUACAGGGCUUUUGAC	13440-13547	-29.2
525	>MT358637.1_263	AUCGUUUUUAAACGGGUUUGCGGUGUAAGUGCAGCCCGUCUUACACCGUGCGGCACAGGCACUAGUACUGAUGUCGUAUACAGGGCUUUUGACAUCUACAAUGAU	13455-13559	-26.9
527	>MT358637.1_264	GGCACUAGUACUGAUGUCGUAUACAGGGCUUUUGACAUCUACAAUGAUAAAGUAGCUGGUUUUGCUAAAUUCCUAAAAACUAAUUGUUGUC	13512-13602	-15.2
529	>MT358637.1_265	UGUCGUAUACAGGGCUUUUGACAUCUACAAUGAUAAAGUAGCUGGUUUUGCUAAAUUCCUAAAAACUAAUUGUUGUCGCUUCCAAGAAAAGGACGAAGAUGACA	13526-13629	-19.6
531	>MT358637.1_266	AAAGUAGCUGGUUUUGCUAAAUUCCUAAAAACUAAUUGUUGUCGCUUCCAAGAAAAGGACGAAGAUGACAAUUUAAUUGAUUCUUACUUUGUAGUUAAGAGACACACUUU	13560-13669	-22.3
533	>MT358637.1_267	GGACGAAGAUGACAAUUUAAUUGAUUCUUACUUUGUAGUUAAGAGACACACUUUCUCUAACUACCAACAUGAAGAAACAAUUUAUAAUUUACUUAAGGAUUGUCC	13616-13720	-30.7
535	>MT358637.1_268	UACCAACAUGAAGAAACAAUUUAUAAUUUACUUAAGGAUUGUCCAGCUGUUGCUAAACAUGACUUCUUUAAGUUUAGAAUAGACGGUGACAUGGUA	13677-13772	-27.5
537	>MT358637.1_269	UGACAUGGUACCACAUAUAUCACGUCAACGUCUUACUAAAUACACAAUGGCAGACCUCGUCUAUGCUUUAAGGCAUUUUGAUGAAGGUAAUUGUGACACAUUA	13763-13865	-26.9
539	>MT358637.1_270	AUGCUUUAAGGCAUUUUGAUGAAGGUAAUUGUGACACAUUAAAAGAAAUACUUGUCACAUACAAUUGUUGUGAUGAUGAUUAU	13825-13907	-17.5
541	>MT358637.1_271	UGGUAUGAUUUUGUAGAAAACCCAGAUAUAUUACGCGUAUACGCCAACUUAGGUGAACGUGUACGCCAAGCUUUGUUAAAAACAGUACAAUUCUGUGAUGCCA	13923-14025	-26.3
543	>MT358637.1_272	GUACGCCAAGCUUUGUUAAAAACAGUACAAUUCUGUGAUGCCAUGCGAAAUGCUGGUAUUGUUGGUGUACUGACAUUAGAUAAUCAAGAUCUCAAUGGUAAC	13983-14084	-25.2
545	>MT358637.1_273	GCGAAAUGCUGGUAUUGUUGGUGUACUGACAUUAGAUAAUCAAGAUCUCAAUGGUAACUGGUAUGAUUUCGGUGAUUUCAUACAAACCACGCCAGGUAGUGGAGU	14027-14131	-26.6
547	>MT358637.1_274	GCUGGUAUUGUUGGUGUACUGACAUUAGAUAAUCAAGAUCUCAAUGGUAACUGGUAUGAUUUCGGUGAUUUCAUACAAACCACGCCAGGUAGUGGAGU	14034-14131	-25.2
549	>MT358637.1_275	CGGUGAUUUCAUACAAACCACGCCAGGUAGUGGAGUUCCUGUUGUAGAUUCUUAUUAUUCAUUG	14096-14159	-12.2
551	>MT358637.1_276	AGGUAGUGGAGUUCCUGUUGUAGAUUCUUAUUAUUCAUUGUUAAUGCCUAUAUUAACCUUGACCAGGGCUUUAACUGCAGAGUCACAUGUUGACACUGACU	14120-14220	-23.5
553	>MT358637.1_277	AGUGGAGUUCCUGUUGUAGAUUCUUAUUAUUCAUUGUUAAUGCCUAUAUUAACCUUGACCAGGGCUUUAACUGCAGAGUCACAUGUUGACACUGACU	14124-14220	-23.3
555	>MT358637.1_278	UUAACCUUGACCAGGGCUUUAACUGCAGAGUCACAUGUUGACACUGACUUAACAAAGCCUUACAUUAAGUGGGAUUUGUUAAAAUAUGACUUCACGGAAGAGAGGUUAA	14172-14280	-30.4
557	>MT358637.1_279	GACCAGGGCUUUAACUGCAGAGUCACAUGUUGACACUGACUUAACAAAGCCUUACAUUAAGUGGGAUUUGUUAAAAUAUGACUUCACGGAAGAGAGGUUAAAACUC	14180-14285	-28.6
559	>MT358637.1_280	AUUUGUUAAAAUAUGACUUCACGGAAGAGAGGUUAAAACUCUUUGACCGUUAUUUUAAAUAUUGGGAUCAGACAUACCACCCAAAUUGUGUUAACUGUUUGGAUGACAGAU	14245-14355	-18.9
561	>MT358637.1_281	CUGCAUUGUGCAAACUUUAAUGUUUUAUUCUCUACAGUGUUCCCACUUACAAGUUUUGGACCACUAGUGAGAAAAAUAUUUGUUGAUGGUGUUCCAUUUGUAG	14361-14463	-29.2
563	>MT358637.1_282	ACAGAUGCAUUCUGCAUUGUGCAAACUUUAAUGUUUUAUUCUCUACAGUGUUCCCACUUACAAGUUUUGGACCACUAGUGAGAAAAAUAUUUGUUGAUGGUGUUCCAUUUGU	14350-14461	-31.8
565	>MT358637.1_283	GUGUUCCCACUUACAAGUUUUGGACCACUAGUGAGAAAAAUAUUUGUUGAUGGUGUUCCAUUUGUAGUUUCAACUGGAUACCACUUCAGAGAGCUAGGUGUUGUACAU	14397-14504	-29.8
567	>MT358637.1_284	CUAGUGAGAAAAAUAUUUGUUGAUGGUGUUCCAUUUGUAGUUUCAACUGGAUACCACUUCAGAGAGCUAGGUGUUGUACAUAAUCAGGAUGUAAACUUACAUAG	14424-14527	-32.7
569	>MT358637.1_285	CAUUUGUAGUUUCAACUGGAUACCACUUCAGAGAGCUAGGUGUUGUACAUAAUCAGGAUGUAAACUUACAUAGCUCUAGACUUAGUUUUAAGGAAUUACUUGUG	14455-14558	-33.4
571	>MT358637.1_286	UCAGAGAGCUAGGUGUUGUACAUAAUCAGGAUGUAAACUUACAUAGCUCUAGACUUAGUUUUAAGGAAUUACUUGUGUAUGCUGCUGACCCUGCUAUGCACGCUGCUUCUGG	14482-14593	-33.4
573	>MT358637.1_287	UUACUUGUGUAUGCUGCUGACCCUGCUAUGCACGCUGCUUCUGGUAAUCUAUUACUAGAUAAACGCACUACGUGCUUUUCAGUAGCUGCACUUACUAA	14550-14647	-39.8
575	>MT358637.1_288	UAGAUAAACGCACUACGUGCUUUUCAGUAGCUGCACUUACUAACAAUGUUGCUUUUCAAACUGUCAAACCCGGUAAUUUUAACAAAGACUUCUAUGACUUUGCUGUGUCUA	14605-14715	-22.1
577	>MT358637.1_289	CUGUCAAACCCGGUAAUUUUAACAAAGACUUCUAUGACUUUGCUGUGUCUAAGGGUUUCUUUAAGGAAGGAAGUUCUGUUGAAUUAAAACACUUCUUCUUUGCUCAG	14665-14771	-25
579	>MT358637.1_290	GGGUUUCUUUAAGGAAGGAAGUUCUGUUGAAUUAAAACACUUCUUCUUUGCUCAGGAUGGUAAUGCUGCUAUCAGCGAUUAUGACUACUAUCGUUAUAAUCU	14717-14818	-25.3
581	>MT358637.1_291	AUGACUACUAUCGUUAUAAUCUACCAACAAUGUGUGAUAUCAGACAACUACUAUUUGUAGUUGAAGUUGUUGAUAAGUACUUUGAUUGUUACGAUGGUGGCUGU	14797-14900	-33.2
583	>MT358637.1_292	AGUUGAAGUUGUUGAUAAGUACUUUGAUUGUUACGAUGGUGGCUGUAUUAAUGCUAACCAAGUCAUCGUCAACAACCUAGACAAAUCAGCUGGUUUUCCAUU	14855-14956	-30.1
585	>MT358637.1_293	GUCAUCGUCAACAACCUAGACAAAUCAGCUGGUUUUCCAUUUAAUAAAUGGGGUAAGGCUAGACUUUAUUAUGAUUCAAUGAGUUAUGAGGAU	14916-15008	-17.6
587	>MT358637.1_294	UGAGUUAUGAGGAUCAAGAUGCACUUUUCGCAUAUACAAAACGUAAUGUCAUCCCUACUAUAACUCAAAUGAAUCUUAAGUAUGCCAUUAGUGCAAAGAAUAGAGCUCG	14995-15103	-29.1
589	>MT358637.1_295	GCUCGCACCGUAGCUGGUGUCUCUAUCUGUAGUACUAUGACCAAUAGACAGUUUCAUCAAAAAUUAUUGAAAUCAAUAGCCGCCACUAGAGGAGCUACUGUAGU	15099-15202	-26.9
591	>MT358637.1_296	CAUCAAAAAUUAUUGAAAUCAAUAGCCGCCACUAGAGGAGCUACUGUAGUAAUUGGAACAAGCAAAUUCUAUGGUGGUUGGCACAACAUGUUAAAAACUGUUUAUAGUGAUG	15153-15264	-31.3
593	>MT358637.1_297	AAUUCUAUGGUGGUUGGCACAACAUGUUAAAAACUGUUUAUAGUGAUGUAGAAAACCCUCACCUUAUGGGUUGGGAUU	15217-15294	-18.2
595	>MT358637.1_298	AGUGAUGUAGAAAACCCUCACCUUAUGGGUUGGGAUUAUCCUAAAUGUGAUAGAGCCAUGCCUAACAUGCUUAGAAUUAUGGCCUCACU	15258-15346	-24.4
597	>MT358637.1_299	UGUGAUAGAGCCAUGCCUAACAUGCUUAGAAUUAUGGCCUCACUUGUUCUUGCUCGCA	15303-15360	-15.8
599	>MT358637.1_300	UAUGGCCUCACUUGUUCUUGCUCGCAAACAUACAACGUGUUGUAGCUUGUCACACCGUUUCUAUAGAUUAGCUAAUGAGUGUGCUCAAGUAUUGAGUGAAAUGGUCAUG	15335-15443	-32.2
601	>MT358637.1_301	AACGUGUUGUAGCUUGUCACACCGUUUCUAUAGAUUAGCUAAUGAGUGUGCUCAAGUAUUGAGUGAAAUGGUCAUGUGUGGCGGUUCACUAUAUGUU	15368-15464	-29
603	>MT358637.1_302	UGUGGCGGUUCACUAUAUGUUAAACCAGGUGGAACCUCAUCAGGAGAUGCCACA	15444-15497	-14.7
605	>MT358637.1_303	CACUAUAUGUUAAACCAGGUGGAACCUCAUCAGGAGAUGCCACAACUGCUUAUGCUAAUAGUG	15454-15516	-15.6
607	>MT358637.1_304	UCAUCAGGAGAUGCCACAACUGCUUAUGCUAAUAGUGUUUUUAACAUUUGUCAAGCUGUCACGGCCAAUGUUAAUGCACUUUUAUCUACUGAUGG	15480-15574	-25.3
609	>MT358637.1_305	CAGACUUUAUGAGUGUCUCUAUAGAAAUAGAGAUGUUGACACAGACUUUGUGAAUGAGUUUUACGCAUAUUUGCGUAAACAUUUCUCAAUGAUGAUACUCUCUG	15614-15717	-33.6
611	>MT358637.1_306	GCGUAAACAUUUCUCAAUGAUGAUACUCUCUGACGAUGCUGUUGUGUGUUUCAAUAGCACUUAUGCAUCUCAAGGUCUAGUGGCUAGCAUAAAGAACUUUAAGU	15686-15789	-27.3
613	>MT358637.1_307	AGGUCUAGUGGCUAGCAUAAAGAACUUUAAGUCAGUUCUUUAUUAUCAAAACAAUGUUUUUAUGUCUGAAGCAAAAUGUUGGACUGAGACUGACCUUACUAAAGGACCU	15758-15866	-27.8
615	>MT358637.1_308	CAUAAAGAACUUUAAGUCAGUUCUUUAUUAUCAAAACAAUGUUUUUAUGUCUGAAGCAAAAUGUUGGACUGAGACUGACCUUACUAAAGGACCUCAUG	15773-15870	-25.2
617	>MT358637.1_309	UUAUUAUCAAAACAAUGUUUUUAUGUCUGAAGCAAAAUGUUGGACUGAGACUGACCUUACUAAAGGACCUCAUGAAUUUUGCUCUCAACAUACAAUGCUAGUUAAACAGGGUGAUGA	15797-15913	-32
619	>MT358637.1_310	UUUUGCUCUCAACAUACAAUGCUAGUUAAACAGGGUGAUGAUUAUGUGUACCUUCCUUACCCAGAUCCAUCAAGAAUCCUAGGGGCCGGCUGUUUUGUAGAUGAUAUCGUAAAA	15873-15986	-28
621	>MT358637.1_311	ACCCAGAUCCAUCAAGAAUCCUAGGGGCCGGCUGUUUUGUAGAUGAUAUCGUAAAAACAGAUGGUACACUUAUGAUUGAACGGU	15931-16014	-22.3
623	>MT358637.1_312	GGGCCGGCUGUUUUGUAGAUGAUAUCGUAAAAACAGAUGGUACACUUAUGAUUGAACGGUUCGUGUCUUUAGCUAUAGAUGCUUACCC	15955-16042	-23.7
625	>MT358637.1_313	AUCAGGAGUAUGCUGAUGUCUUUCAUUUGUACUUACAAUACAUAAGAAAGCUACAUGAUGAGUUAACAGGACACAUGUUAGACAUGUAUUCUGUUAUGCUUACUAAUGAU	16060-16169	-30
627	>MT358637.1_314	AGGACACAUGUUAGACAUGUAUUCUGUUAUGCUUACUAAUGAUAACACUUCAAGGUAUUGGGAACCUGAGUUUUAUGAGGCUAUGUACACACCGCAUACAGUCUU	16127-16231	-21.2
629	>MT358637.1_315	UGUUAGACAUGUAUUCUGUUAUGCUUACUAAUGAUAACACUUCAAGGUAUUGGGAACCUGAGUUUUAUGAGGCUAUGUACACACCGCAUACAGUCUUACA	16135-16234	-22.5
631	>MT358637.1_316	GAGUUUUAUGAGGCUAUGUACACACCGCAUACAGUCUUACAGGCUGUUGGGGCUUGUGUUCUUUGCAAUUCACAGACUU	16194-16272	-25.9
633	>MT358637.1_317	UAUGAGGCUAUGUACACACCGCAUACAGUCUUACAGGCUGUUGGGGCUUGUGUUCUUUGCAAUUCACAGACUUCAUUAAGAUGUGGUGCUUGCAUACGUAGACCAUUCUUAUG	16200-16312	-34.1
635	>MT358637.1_318	UGCUUGCAUACGUAGACCAUUCUUAUGUUGUAAAUGCUGUUACGACCAUGUCAUAUCAACAUCACAUAAAUUAGUCUUGUCUGUUAAUCCGUAUGUUUGCA	16286-16386	-30.8
637	>MT358637.1_319	GUUACGACCAUGUCAUAUCAACAUCACAUAAAUUAGUCUUGUCUGUUAAUCCGUAUGUUUGCAAUGCUCCAGGUUGUGAUGUCACAGAUGUGAC	16324-16417	-26.3
639	>MT358637.1_320	AUGUUUGCAAUGCUCCAGGUUGUGAUGUCACAGAUGUGACUCAACUUUACUUAGGAGGUAUGAGCUAUUAUUGUAAAUCACAUAAACCACCCAUUAGUUUUCCAU	16378-16482	-24.6
641	>MT358637.1_321	UAUGAGCUAUUAUUGUAAAUCACAUAAACCACCCAUUAGUUUUCCAUUGUGUGCUAAUGGACAAGUUUUUGGUUUAUAUAAAAAUACAUGUGUUGGUAGCGAUA	16436-16539	-29.8
643	>MT358637.1_322	UACAUGUGUUGGUAGCGAUAAUGUUACUGACUUUAAUGCAAUUGCAACAUGUGACUGGACAAAUGCUGGUGAUUACAUUUUAGCUAACACCUGUA	16520-16614	-29.9
645	>MT358637.1_323	AUGUGACUGGACAAAUGCUGGUGAUUACAUUUUAGCUAACACCUGUACUGAAAGACUCAAGCUUUUUGCAGCAGAAACGCUCAAAGCUACUGAGGAGACAU	16568-16668	-24.9
647	>MT358637.1_324	UUUUGCAGCAGAAACGCUCAAAGCUACUGAGGAGACAUUUAAACUGUCUUAUGGUAUUGCUACUGUACGUGAAGUGCUGUCUGA	16631-16714	-27.6
649	>MT358637.1_325	UUAAACUGUCUUAUGGUAUUGCUACUGUACGUGAAGUGCUGUCUGACAGAGAAUUACAUCUUUCAUGGGAAGUUGGUAAACCUAGACCACCACUUAA	16669-16765	-23.5
651	>MT358637.1_326	UUUCAUGGGAAGUUGGUAAACCUAGACCACCACUUAACCGAAAUUAUGUCUUUACUGGUUAUCGUGUAACUAAAAACAGUAAAGUACAAAUAGGAGAGUACACCUUUGAAA	16729-16839	-22.1
653	>MT358637.1_327	UGUAACUAAAAACAGUAAAGUACAAAUAGGAGAGUACACCUUUGAAAAAGGUGACUAUGGUGAUGCUGUUGUUUACCGAGGUACA	16793-16877	-25.2
655	>MT358637.1_328	AGGUGACUAUGGUGAUGCUGUUGUUUACCGAGGUACAACAACUUACAAAUUAAAUGUUGGUGAUUAUUUUGUGCUGACAUCACAUACAGUAAUGCCAUUAAGUGCACCU	16841-16949	-38.7
657	>MT358637.1_329	GUAAUGCCAUUAAGUGCACCUACACUAGUGCCACAAGAGCACUAUGUUAGAAUUACUGGCUUAUAC	16929-16994	-20.6
659	>MT358637.1_330	UACCCAACACUCAAUAUCUCAGAUGAGUUUUCUAGCAAUGUUGCAAAUUAUCAAAAGGUUGGUAUGCAAAAGUAUUCUACACUCCAGGGACCACCUGGUA	16992-17091	-21.5
661	>MT358637.1_331	GGUUGGUAUGCAAAAGUAUUCUACACUCCAGGGACCACCUGGUACUGGUAAGAGUCAUUUUGCUAUUGGCCUAGCU	17048-17123	-26.3
663	>MT358637.1_332	CAGGGACCACCUGGUACUGGUAAGAGUCAUUUUGCUAUUGGCCUAGCUCUCUACUACCCUUCUGCUCGCAUAGUGUAUACAGCUUGCUCUCAUGCCGCUGUUGAUG	17076-17181	-26.5
665	>MT358637.1_333	UCUGCUCGCAUAGUGUAUACAGCUUGCUCUCAUGCCGCUGUUGAUGCACUAUGUGAGAAGG	17136-17196	-29.6
667	>MT358637.1_334	UCAUGCCGCUGUUGAUGCACUAUGUGAGAAGGCAUUAAAAUAUUUGCCUAUAGAUAAAUGUAGUAGAAUUAUACCUGCACGUGCUCGUGUAGAGUGUUUUGA	17165-17266	-27.7
669	>MT358637.1_335	UUGAUAAAUUCAAAGUGAAUUCAACAUUAGAACAGUAUGUCUUUUGUACUGUAAAUGCAUUGCCUGAGACGACAGCAGAUAUAGUUGUCUUUGAUGAAAUUUCAA	17263-17367	-28.6
671	>MT358637.1_336	UCAAAGUGAAUUCAACAUUAGAACAGUAUGUCUUUUGUACUGUAAAUGCAUUGCCUGAGACGACAGCAGAUAUAGUUGUCUUUGAUGAAAUUUCAAUGG	17272-17370	-26.1
673	>MT358637.1_337	UGUAAAUGCAUUGCCUGAGACGACAGCAGAUAUAGUUGUCUUUGAUGAAAUUUCAAUGGCCACAAAUUAUGAUUUGAGUGUUGUCAAUGCCAGAUUACGUGCUAAGCA	17312-17419	-27.1
675	>MT358637.1_338	AAUUUCAAUGGCCACAAAUUAUGAUUUGAGUGUUGUCAAUGCCAGAUUACGUGCUAAGCACUAUGUGUACAUUGGCGACCCUGCUCAAUUACCUGCACCACGCACAUU	17360-17467	-25.4
677	>MT358637.1_339	GCACUAUGUGUACAUUGGCGACCCUGCUCAAUUACCUGCACCACGCACAUUGCUAACUAAGGGCACACUAGAACCAGAAUAUUUCAAUUCAGUGU	17417-17511	-16.9
679	>MT358637.1_340	ACCUGCACCACGCACAUUGCUAACUAAGGGCACACUAGAACCAGAAUAUUUCAAUUCAGUGUGUAGACUUAUGAAAACUAUAGGU	17450-17534	-15.2
681	>MT358637.1_341	GCUAACUAAGGGCACACUAGAACCAGAAUAUUUCAAUUCAGUGUGUAGACUUAUGAAAACUAUAGGU	17468-17534	-13.4
683	>MT358637.1_342	GAACCAGAAUAUUUCAAUUCAGUGUGUAGACUUAUGAAAACUAUAGGUCCAGACAUGUUCCUCGGAACUUGUCGGCGUUGUCCUGCUGAAAUUGUUGACACUGUGAGUGCUUUGGUUU	17487-17604	-35.6
685	>MT358637.1_343	GGAACUUGUCGGCGUUGUCCUGCUGAAAUUGUUGACACUGUGAGUGCUUUGGUUUAUGAUAAUAAGCUUAAAGCACAUAAAGACAAAUCAGCUCAAUGCUUUAAAAUGUUUU	17550-17661	-36.8
687	>MT358637.1_344	AAUCAGCUCAAUGCUUUAAAAUGUUUUAUAAGGGUGUUAUCACGCAUGAUGUUUCAUCUGCAAUU	17635-17699	-12
689	>MT358637.1_345	CUUUAAAAUGUUUUAUAAGGGUGUUAUCACGCAUGAUGUUUCAUCUGCAAUUAACAGGCCACAAAUAGGCGUGGUAAGAGAAUUCCUUACACGUAACCCUGCUUGGAG	17648-17755	-30.5
691	>MT358637.1_346	AGGCCACAAAUAGGCGUGGUAAGAGAAUUCCUUACACGUAACCCUGCUUGGAGAAAAGCUGUCU	17703-17766	-14.6
693	>MT358637.1_347	AGGCCACAAAUAGGCGUGGUAAGAGAAUUCCUUACACGUAACCCUGCUUGGAGAAAAGCUGUCUUUAUUUCACCUUAUAAUUCACAGAAUGCUGUAGCCU	17703-17802	-21
695	>MT358637.1_348	UAUAAUUCACAGAAUGCUGUAGCCUCAAAGAUUUUGGGACUACCAACUCAAACUGUUGAUUCAUCACAGGGCUCAGAAUAUGACUAUG	17778-17865	-18.4
697	>MT358637.1_349	GAAUGCUGUAGCCUCAAAGAUUUUGGGACUACCAACUCAAACUGUUGAUUCAUCACAGGGCUCAGAAUAUGACUAUGUCAUAUUC	17789-17873	-16.6
699	>MT358637.1_350	CUAUGUCAUAUUCACUCAAACCACUGAAACAGCUCACUCUUGUAAUGUAAACAGAUUUAAUGUUGCUAUUACCAGAGCAAAAGUAGGCAUACUUUGCAUAAUGUCUGAUAG	17861-17971	-24.5
701	>MT358637.1_351	UUCACUCAAACCACUGAAACAGCUCACUCUUGUAAUGUAAACAGAUUUAAUGUUGCUAUUACCAGAGCAAAAGUAGGCAUACUUUGCAUAAUGUCUGAUAGAG	17871-17973	-23.7
703	>MT358637.1_352	AGGCAUACUUUGCAUAAUGUCUGAUAGAGACCUUUAUGACAAGUUGCAAUUUACAAGUCU	17945-18004	-17.7
705	>MT358637.1_353	GUUGCAAUUUACAAGUCUUGAAAUUCCACGUAGGAAUGUGGCAACUUUACAAGCUGAAAAUGUAAC	17987-18052	-20.1
707	>MT358637.1_354	GUAGGAAUGUGGCAACUUUACAAGCUGAAAAUGUAACAGGACUCUUUAAAGAUUGUAGUAAGGUAAUCACUGGGUUACAUCCUACACAGGCACCUAC	18016-18112	-21.3
709	>MT358637.1_355	UGGGUUACAUCCUACACAGGCACCUACACACCUCAGUGUUGACACUAAAUUCAAAACUGAAGGUUUAUGUGUUGACAUACCUGGCAUACCUA	18086-18177	-27
711	>MT358637.1_356	AGGUAAUCACUGGGUUACAUCCUACACAGGCACCUACACACCUCAGUGUUGACACUAAAUUCAAAACUGAAGGUUUAUGUGUUGACAUACCUGGCAUACCU	18076-18176	-34.8
713	>MT358637.1_357	GUGUUGACAUACCUGGCAUACCUAAGGACAUGACCUAUAGAAGACUCAUCUCUAUGAUGGGUUUUAAAAUGAAUUAUCAAGUUAAUGGUUACCCUAACAUGUUUAUCAC	18154-18262	-29.8
715	>MT358637.1_358	UGAAUUAUCAAGUUAAUGGUUACCCUAACAUGUUUAUCACCCGCGAAGAAGCUAUAAGACAUGUACGUGCAUGGAUUGGCUUCGAUGUCG	18223-18312	-17.8
717	>MT358637.1_359	AGAAGCUAUAAGACAUGUACGUGCAUGGAUUGGCUUCGAUGUCGAGGGGUGUCAUGCUACU	18269-18329	-16.5
719	>MT358637.1_360	UGUCAUGCUACUAGAGAAGCUGUUGGUACCAAUUUACCUUUACAGCUAGGUUUUUCUACA	18318-18377	-19.5
721	>MT358637.1_361	UGUUGGUACCAAUUUACCUUUACAGCUAGGUUUUUCUACAGGUGUUAACCUAGUUGCUGUACCUACAGGUUAUGUUGAUACACCUA	18338-18423	-23.3
723	>MT358637.1_362	UAGGUUUUUCUACAGGUGUUAACCUAGUUGCUGUACCUACAGGUUAUGUUGAUACACCUA	18364-18423	-16.5
725	>MT358637.1_363	AGGUGUUAACCUAGUUGCUGUACCUACAGGUUAUGUUGAUACACCUAAUAAUACAGAUUUUUCCAGAGUUAGUGCUAAACCACCGCCUGGAGAUCAAUUUAAACACCU	18377-18484	-27
727	>MT358637.1_364	CACUUAUGUACAAAGGACUUCCUUGGAAUGUAGUGCGUAUAAAGAUUGUACAAAUGUUAAGUG	18490-18552	-13.1
729	>MT358637.1_365	ACUUAAAAAUCUCUCUGACAGAGUCGUAUUUGUCUUAUGGGCACAUGGCUUUGAGU	18557-18612	-13.9
731	>MT358637.1_366	AUCUCUCUGACAGAGUCGUAUUUGUCUUAUGGGCACAUGGCUUUGAGUUGACAUCUAUGAAGUAUUUUGUGAAAAUAGGACCUGAGCGCACCUGUUGUCUAUGUGAU	18565-18671	-31
733	>MT358637.1_367	AGUAUUUUGUGAAAAUAGGACCUGAGCGCACCUGUUGUCUAUGUGAUAGACGUGCCACAUGCUUUUCCACUGCUUCAGACACUUAUGCCUGUUGGCAUCAUUCUAUU	18625-18731	-27
735	>MT358637.1_368	GUGAUAGACGUGCCACAUGCUUUUCCACUGCUUCAGACACUUAUGCCUGUUGGCAUCAUUCUAUUGGAUUUGAUUACGUCUAUAAU	18667-18752	-26.8
737	>MT358637.1_369	ACUUAUGCCUGUUGGCAUCAUUCUAUUGGAUUUGAUUACGUCUAUAAUCCGUUUAUGAUUGAUGUUCAACAAUGGGGUUUUACAGGU	18705-18791	-25
739	>MT358637.1_370	UUAUGAUUGAUGUUCAACAAUGGGGUUUUACAGGUAACCUACAAAGCAACCAUGAUCUGUAUUGUCAAGUCCAUGGUAAUGCACAUGUAGCUAGUUGUGAUGCAAUCAUGA	18757-18867	-28.5
741	>MT358637.1_371	AGUCCAUGGUAAUGCACAUGUAGCUAGUUGUGAUGCAAUCAUGACUAGGUGUCUAGCUGUCCACGAGUGCUUUGUUAAGCGUGUUGACUGGACU	18824-18917	-30.3
743	>MT358637.1_372	GUGUCUAGCUGUCCACGAGUGCUUUGUUAAGCGUGUUGACUGGACUAUUGAAUAUCCUAUAAUUGGUGAUGAACUGAAGAUUAAUGCGGCUUGUAGAAAGGUUCAACAC	18872-18980	-24
745	>MT358637.1_373	AAUUGGUGAUGAACUGAAGAUUAAUGCGGCUUGUAGAAAGGUUCAACACAUGGUUGUUAAAGCUGCAUUAUUAGCAGACAAAUUCCCAGUU	18932-19022	-27.8
747	>MT358637.1_374	UGCAUUAUUAGCAGACAAAUUCCCAGUUCUUCACGACAUUGGUAACCCUAAAGCUAUUAAGUGUGUACCUCAAGCUGAUGUAGAAUGGAAGUUCUAUGAUGCA	18995-19097	-25.5
749	>MT358637.1_375	AGUGUGUACCUCAAGCUGAUGUAGAAUGGAAGUUCUAUGAUGCACAGCCUUGUAGUGACAAAGCUUAUAAAAUAGAAGAAUUAUUCUAUUCUUAUGCCACACAUU	19054-19158	-35
751	>MT358637.1_376	AUUCUAUUCUUAUGCCACACAUUCUGACAAAUUCACAGAUGGUGUAUGCCUAUUUUGGAAU	19136-19196	-13.2
753	>MT358637.1_377	UCUAUUCUUAUGCCACACAUUCUGACAAAUUCACAGAUGGUGUAUGCCUAUUUUGGAAUUGCAAUGUCGAUAGA	19138-19211	-15.1
755	>MT358637.1_378	UAUUCUUAUGCCACACAUUCUGACAAAUUCACAGAUGGUGUAUGCCUAUUUUGGAAUUGCAAUGUCGAUAGAUAUCCUGCUAAUUCCAUUGUUUGUAGAUUUGACACUAGAGUG	19140-19253	-25.6
757	>MT358637.1_379	UCACAGAUGGUGUAUGCCUAUUUUGGAAUUGCAAUGUCGAUAGAUAUCCUGCUAAUUCCAUUGUUUGUAGAUUUGACACUAGAGUGCUAUCUAACCUUAACUUGCCUGGUUGUGA	19168-19282	-27
759	>MT358637.1_380	UGUUUGUAGAUUUGACACUAGAGUGCUAUCUAACCUUAACUUGCCUGGUUGUGAUGGUGGCAGUUUGUAUGUAAAUAAACA	19229-19309	-23.9
761	>MT358637.1_381	UAUGUAAAUAAACAUGCAUUCCACACACCAGCUUUUGAUAAAAGUGCUUUUGUUAAUUUAAAACAAUUACCAUUUUUCUAUUACUCUGACAGUCCAUGUGAGUCUCAUG	19296-19404	-23.9
763	>MT358637.1_382	CAUUUUUCUAUUACUCUGACAGUCCAUGUGAGUCUCAUGGAAAACAAGUAGUGUCAGAUAUAGAUUAUG	19366-19434	-20.8
765	>MT358637.1_383	CUCAUGGAAAACAAGUAGUGUCAGAUAUAGAUUAUGUACCACUAAAGUCUGCUACGUGUAUAACACGUUGCAAUUUAGGUGGUGCUGUCUGUAGACAUCAUGCUAAUGAG	19399-19508	-43.7
767	>MT358637.1_384	UAGGUGGUGCUGUCUGUAGACAUCAUGCUAAUGAGUACAGAUUGUAUCUCGAUGCUUAUAACAUGAUGAUCUCAGCUGGCUUUAGCUUGUGGGUUUACAAACAAUUUGAUACUUA	19474-19588	-35.1
769	>MT358637.1_385	CUUUAGCUUGUGGGUUUACAAACAAUUUGAUACUUAUAACCUCUGGAACACUUUUACAAGACUUCAGAGUUUAGAAAAUGUGGCUUUUAAUGUUGUAAAUAAGG	19553-19656	-15.8
771	>MT358637.1_386	CUCUGGAACACUUUUACAAGACUUCAGAGUUUAGAAAAUGUGGCUUUUAAUGUUGUAAAUAAGGG	19593-19657	-13.1
773	>MT358637.1_387	ACAAGACUUCAGAGUUUAGAAAAUGUGGCUUUUAAUGUUGUAAAUAAGGGACACUUUGAUGGACAACAGGGUGAAGUACCAGUUUCUAUCAUUAAUAACACUGU	19608-19711	-27.1
775	>MT358637.1_388	AACAGGGUGAAGUACCAGUUUCUAUCAUUAAUAACACUGUUUACACAAAAGUUGAUGGUGUUGAUGUAGAAUUGUUUGAAAAUAAAACAACAUUACCUGUU	19672-19772	-23.5
777	>MT358637.1_389	UUGAUGGUGUUGAUGUAGAAUUGUUUGAAAAUAAAACAACAUUACCUGUUAAUGUAGCAUUUGAGCUUUGGGCUAAGCGCAACAUUAAACCAGUACCAG	19723-19821	-20.2
779	>MT358637.1_390	UUACCUGUUAAUGUAGCAUUUGAGCUUUGGGCUAAGCGCAACAUUAAACCAGUACCAGAGGUGA	19764-19827	-17.8
781	>MT358637.1_391	UGGGCUAAGCGCAACAUUAAACCAGUACCAGAGGUGAAAAUACUCAAUAAUUUGGGUGUGGACAUUGCUGCUAAUACUGUGAUCUGGGACUA	19791-19882	-23.8
783	>MT358637.1_392	CAAAAGAGAUGCUCCAGCACAUAUAUCUACUAUUGGUGUUUGUUCUAUGACUGACAUAGCCAAGAAACCAACUGAAACGAUUUGUGCACCACUCACUGUCUUUUUUG	19883-19989	-32.2
785	>MT358637.1_393	ACCAACUGAAACGAUUUGUGCACCACUCACUGUCUUUUUUGAUGGUAGAGUUGAUGGUCAAGUAGACUUAUUUAGAAAUGCCCGUAAUGGUGUUCUUAUUACAGAAGGU	19949-20057	-30.8
787	>MT358637.1_394	UGGUAGAGUUGAUGGUCAAGUAGACUUAUUUAGAAAUGCCCGUAAUGGUGUUCUUAUUACAGAAGGUAGUGUUAAAGGUUUACAACCAUCUGUAGGUCCCA	19991-20091	-29
789	>MT358637.1_395	GACUUAUUUAGAAAUGCCCGUAAUGGUGUUCUUAUUACAGAAGGUAGUGUUAAAGGUUUACAACCAUCUGUAGGUCCCAAACAAGCUAGUCUUAAUGGAGUC	20013-20114	-32.5
791	>MT358637.1_396	ACCAUCUGUAGGUCCCAAACAAGCUAGUCUUAAUGGAGUCACAUUAAUUGGAGAAGCCGUAAAAACACAGUUCAAUUAUUAUAAGAAAGUUGAUGGU	20075-20171	-22.1
793	>MT358637.1_397	AAACACAGUUCAAUUAUUAUAAGAAAGUUGAUGGUGUUGUCCAACAAUUACCUGAAACUUACUUU	20137-20201	-10.7
795	>MT358637.1_398	UAAGAAAGUUGAUGGUGUUGUCCAACAAUUACCUGAAACUUACUUUACUCAGAGUAGAAAUUUACAAGAAUUUAAACCCAGGAGUCAAAUGGAAAUUGAUUUCUUA	20156-20261	-15.7
797	>MT358637.1_399	GAUUUCUUAGAAUUAGCUAUGGAUGAAUUCAUUGAACGGUAUAAAUUAGAAGGCUAUGCCUUCGAACAUAUCGUUUAUGGAGAUUUUAGUCAUAGUCAGUUAGGUGGUU	20253-20361	-35.3
799	>MT358637.1_400	UCGUUUAUGGAGAUUUUAGUCAUAGUCAGUUAGGUGGUUUACAUCUACUGAUUGGACUAGCUAAACGUUUUAAGGAAUCACCUUUUGAAUUAGAAGAUUUUAUUCCUAUGG	20323-20433	-26
801	>MT358637.1_401	CAUCUACUGAUUGGACUAGCUAAACGUUUUAAGGAAUCACCUUUUGAAUUAGAAGAUUUUAUUCCUAUGGACAGUACAGUUAAAAACUAUUUCAUAACAGAUG	20364-20466	-26
803	>MT358637.1_402	AGGUGGUUUACAUCUACUGAUUGGACUAGCUAAACGUUUUAAGGAAUCACCUUUUGAAUUAGAAGAUUUUAUUCCUAUGGACAGUACAGUUAAAAACUAUUU	20354-20455	-24.9
805	>MT358637.1_403	GACAGUACAGUUAAAAACUAUUUCAUAACAGAUGCGCAAACAGGUUCAUCUAAGUGUGUGUGUUCUGUU	20433-20501	-18.3
807	>MT358637.1_404	AUCCCAAGAUUUAUCUGUAGUUUCUAAGGUUGUCAAAGUGACUAUUGACUAUACAGAAAUUUCAUUUAUGCUUUGGUGU	20540-20618	-21.1
809	>MT358637.1_405	GGUUGUCAAAGUGACUAUUGACUAUACAGAAAUUUCAUUUAUGCUUUGGUGUAAAGAUGGCCAUGUAGAAACAUUUUACCCAAAAUUACAAUCUAGUCAAGCGUGGCAACC	20567-20677	-29.2
811	>MT358637.1_406	AGAAAUUUCAUUUAUGCUUUGGUGUAAAGAUGGCCAUGUAGAAACAUUUUACCCAAAAUUACAAUCUAGUCAAGCGUGGCAACCGGGUGUUGCUAUGCCUAAUCU	20594-20698	-25.1
813	>MT358637.1_407	GCAAAGAAUGCUAUUAGAAAAGUGUGACCUUCAAAAUUAUGGUGAUAGUGCAACAUUACCUAAAGGCAUAAUGAUGAAUGUCGCAAAAUAUACUCAACUGUGU	20708-20810	-26
815	>MT358637.1_408	GCUGUACCCUAUAAUAUGAGAGUUAUACAUUUUGGUGCUGGUUCUGAUAAAGGAGUUGCACCAGGUACAGCUGUUUUAAGACAGU	20835-20919	-24.4
817	>MT358637.1_409	GGAGUUGCACCAGGUACAGCUGUUUUAAGACAGUGGUUGCCUACGGGUACGCUGCUUGUCGAUUCAGAUCUUAAUGACUUUGUCUCUGAUGCAGAUUC	20886-20983	-32.3
819	>MT358637.1_410	GGAGUUGCACCAGGUACAGCUGUUUUAAGACAGUGGUUGCCUACGGGUACGCUGCUUGUCGAUUCAGAUCUUAAUGACUUUGUCUCUGAUGCAGAUUCAACUUU	20886-20989	-24.5
821	>MT358637.1_411	AGAUCUUAAUGACUUUGUCUCUGAUGCAGAUUCAACUUUGAUUGGUGAUUGUGCAACUGUACAUACAGCUAAUAAAUGGGAUCU	20951-21034	-19.7
823	>MT358637.1_412	UCUUAAUGACUUUGUCUCUGAUGCAGAUUCAACUUUGAUUGGUGAUUGUGCAACUGUACAUACAGCUAAUAAAUGGGAUCUCAUUAUUAGUGAUAUGUACGACCCUAAGA	20954-21063	-27.2
825	>MT358637.1_413	UUCAACUUUGAUUGGUGAUUGUGCAACUGUACAUACAGCUAAUAAAUGGGAUCUCAUUAUUAGUGAUAUGUACGACCCUAAGACUAAAAAUGUUACAAAAGAA	20981-21083	-25.7
827	>MT358637.1_414	GACCCUAAGACUAAAAAUGUUACAAAAGAAAAUGACUCUAAAGAGGGUUUUUUCACUUACAUUUGUGGGUU	21054-21124	-18.6
829	>MT358637.1_415	GGGUUUUUUCACUUACAUUUGUGGGUUUAUACAACAAAAGCUAGCUCUUGGAGGUUCCGUGGCUAUAAAGAUAACAGAACAUUCUUGGAAUGCUGAUCUUUAUAAGCUC	21098-21206	-21.1
831	>MT358637.1_416	CAUUCUUGGAAUGCUGAUCUUUAUAAGCUCAUGGGACACUUCGCAUGGUGGACAGCCUUUGUUACUAAUGUGAAUG	21177-21252	-15
833	>MT358637.1_417	ACAUUCUUGGAAUGCUGAUCUUUAUAAGCUCAUGGGACACUUCGCAUGGUGGACAGCCUUUGUUACUAAUGU	21176-21247	-15.7
835	>MT358637.1_418	UUCGCAUGGUGGACAGCCUUUGUUACUAAUGUGAAUGCGUCAUCAUCUGAAGCAUUUUUAAUUGGAUGUAAUUAUCUUGGCAAACCACGCGAA	21216-21308	-28.6
837	>MT358637.1_419	CUGAAGCAUUUUUAAUUGGAUGUAAUUAUCUUGGCAAACCACGCGAACAAAUAGAUGGUUAUGUCAUGCAUGCAAAUUACAUAUUUUGGAGGAAUACAAAUCCAAUUCAG	21262-21371	-26.4
839	>MT358637.1_420	AAAUCCAAUUCAGUUGUCUUCCUAUUCUUUAUUUGACAUGAGUAAAUUUCCCCUUAAAUUAAGGGGUACUGCUGUUAUGUCUUUAAAAGAAGGUCAAAUCAAUGAUAUGAUUU	21359-21471	-32.4
841	>MT358637.1_421	AGGGGUACUGCUGUUAUGUCUUUAAAAGAAGGUCAAAUCAAUGAUAUGAUUUUAUCUCUUCUUAGUAAAGGUAGACUUAUAAUUAGAGAAAACAACAGAGUUGUUAUUUCU	21420-21530	-31.7
843	>MT358637.1_422	AUUAGAGAAAACAACAGAGUUGUUAUUUCUAGUGAUGUUCUUGUUAACAACUAAACGAACAAUGUUUGUUUUUCUUGUUUUAUUGCCACUAGUCUCUAGU	21501-21600	-17.6
845	>MT358637.1_423	GUUGUUAUUUCUAGUGAUGUUCUUGUUAACAACUAAACGAACAAUGUUUGUUUUUCUUGUUUUAUUGCCACUAGUCUCUAGUCAGUGUGUUAAUCUUAC	21519-21617	-18
847	>MT358637.1_424	GUUUGUUUUUCUUGUUUUAUUGCCACUAGUCUCUAGUCAGUGUGUUAAUCUUACAACCAGAACUCAAU	21564-21631	-14.6
849	>MT358637.1_425	GUCAGUGUGUUAAUCUUACAACCAGAACUCAAUUACCCCCUGCAUACACUAAUUCUUUCACACGUGGUGUUUAUUACCCUGAC	21599-21681	-15.4
851	>MT358637.1_426	ACUAAUUCUUUCACACGUGGUGUUUAUUACCCUGACAAAGUUUUCAGAUCCUCAGUUUUACAUUCAACUCAGGACUUGUUCUUACCUUUCUUUUCCAAUGUUACUUGGU	21646-21754	-23.4
853	>MT358637.1_427	CAGGACUUGUUCUUACCUUUCUUUUCCAAUGUUACUUGGUUCCAUGCUAUACAUGUCUCUGGGACCAAUGGUACUAAGAGGUUUGAUAACCCUG	21715-21808	-32
855	>MT358637.1_428	AAUGGUACUAAGAGGUUUGAUAACCCUGUCCUACCAUU	21781-21818	-12.5
857	>MT358637.1_429	ACCAUUUAAUGAUGGUGUUUAUUUUGCUUCCACUGAGAAGUCUAACAUAAUAAGAGGCUGGAUUUUUGGU	21813-21882	-14.6
859	>MT358637.1_430	CUGAGAAGUCUAACAUAAUAAGAGGCUGGAUUUUUGGUACUACUUUAGAUUCGAAGACCCAGUCCCUACUUAUUGUUAAUAACGCUACUAAUGUUGUUAUUAAAG	21845-21949	-17.8
861	>MT358637.1_431	CUGUGAAUUUCAAUUUUGUAAUGAUCCAUUUUUGGGUGUUUAUUACCACAAAAACAACAAAAGUUGGAUGGAAAGUGAGUUCAGAGUUUAUUCUAG	21951-22046	-22.4
863	>MT358637.1_432	CCACAAAAACAACAAAAGUUGGAUGGAAAGUGAGUUCAGAGUUUAUUCUAGUGCGAAUAAUUGCACUUUUGAAUAUGUCUCUCAGCCUUUUCUUAUGG	21996-22093	-22.2
865	>MT358637.1_433	CGAAUAAUUGCACUUUUGAAUAUGUCUCUCAGCCUUUUCUUAUGGACCUUGAAGGAAAACAGGGUAAUUUCAAAAAUCUUAGGGAAUUUG	22049-22138	-13.1
867	>MT358637.1_434	AGGGUAAUUUCAAAAAUCUUAGGGAAUUUGUGUUUAAGAAUAUUGAUGGUUAUUUUAAAAUAUAUUCUAAGCACACGCCUAUUAAUUUAGUGCGUGAUCUCCCU	22109-22212	-25.8
869	>MT358637.1_435	GCCUAUUAAUUUAGUGCGUGAUCUCCCUCAGGGUUUUUCGGCUUUAGAACCAUUGGUAGAUUUGCCAAUAGGUAUUAACAUCACUAGGU	22185-22273	-26.9
871	>MT358637.1_436	GUAGAUUUGCCAAUAGGUAUUAACAUCACUAGGUUUCAAACUUUACUUGCUUUACAUAGAAGUUAUUUGACUCCUGGUGAUUCUUCUUCAGGUUGGACAGCUGGUGCUGC	22240-22349	-34.3
873	>MT358637.1_437	UCCUGGUGAUUCUUCUUCAGGUUGGACAGCUGGUGCUGCAGCUUAUUAUGUGGGUUAUCUUCGACCUAGGA	22311-22381	-18.1
875	>MT358637.1_438	GGUGCUGCAGCUUAUUAUGUGGGUUAUCUUCGACCUAGGACUUUUCUAUUAAAAUAUAAUGAAAAUGGAACCAUUACAGAUGCUGUAGACUGUGCACU	22342-22439	-19.2
877	>MT358637.1_439	GGGUUAUCUUCGACCUAGGACUUUUCUAUUAAAAUAUAAUGAAAAUGGAACCAUUACAGAUGCUGUAGACUGUGCACUUGACCC	22362-22445	-16.3
879	>MT358637.1_440	GAUGCUGUAGACUGUGCACUUGACCCUCUCUCAGAAACAAAGUGUACGUUGAAAUC	22420-22475	-13.2
881	>MT358637.1_441	CUUCACUGUAGAAAAAGGAAUCUAUCAAACUUCUAACUUUAGAGUCCAACCAACAGAAUCUAUUGUUAGAUUUCCUAAUAUUACAAACUUGUGCCCUUUUGGUGAAG	22476-22582	-26
883	>MT358637.1_442	UUGUUAGAUUUCCUAAUAUUACAAACUUGUGCCCUUUUGGUGAAGUUUUUAACGCCACCAGAUUUGCAUCUGUUUAUGCUUGGAACAGGAAGAGAAUCAGCAA	22538-22640	-31.3
885	>MT358637.1_443	AACGCCACCAGAUUUGCAUCUGUUUAUGCUUGGAACAGGAAGAGAAUCAGCAACUGUGUUGCUGAUUAUUCUGUCCUAUAUAAUUCCGCAUCAUUUUCCACUUUUAAGUGUU	22588-22699	-32.5
887	>MT358637.1_444	UGUUAUGGAGUGUCUCCUACUAAAUUAAAUGAUCUCUGCUUUACUAAUGUCUAUGCAGAUUCAUUUGUAAUUAGAGGUGAUGAAGUCAGACAAAUCGCUCCAGGGCA	22696-22802	-36.3
889	>MT358637.1_445	UCAUUUGUAAUUAGAGGUGAUGAAGUCAGACAAAUCGCUCCAGGGCAAACUGGAAAGAUUGCUGAUUAUAAUUAUAAAUUACCAGAUGA	22756-22844	-27.3
891	>MT358637.1_446	AUUACCAGAUGAUUUUACAGGCUGCGUUAUAGCUUGGAAUUCUAACAAUCUUGAUUCUAAGGUUGGUGGUAAUUAUAAUUACCUGUAUAGAUUGUUUAGGAAGU	22833-22936	-29.9
893	>MT358637.1_447	GGUGGUAAUUAUAAUUACCUGUAUAGAUUGUUUAGGAAGUCUAAUCUCAAACCUUUUGAGAGAGAUAUUUCAACUGAAAUCUAUCAGGCCGGUAGCACACC	22897-22997	-26.5
895	>MT358637.1_448	AACCUUUUGAGAGAGAUAUUUCAACUGAAAUCUAUCAGGCCGGUAGCACACCUUGUAAUGGUGUUGAAGGUUUUAAUUGUUACUUUCCUUUACAAUCAUAUGGUU	22946-23050	-27.9
897	>MT358637.1_449	GAAAUCUAUCAGGCCGGUAGCACACCUUGUAAUGGUGUUGAAGGUUUUAAUUGUUACUUUCCUUUACAAUCAUAUGGUUUC	22972-23052	-20.9
899	>MT358637.1_450	UGAAGGUUUUAAUUGUUACUUUCCUUUACAAUCAUAUGGUUUCCAACCCACUAAUGGUGUUGGUUACCAACCAUACAGAGUAGUAGUACUUUCUUUUGAACUUCUA	23010-23115	-29.1
901	>MT358637.1_451	CAGAGUAGUAGUACUUUCUUUUGAACUUCUACAUGCACCAGCAACUGUUUGUGGACCUAAAAAGUCUACUAAUUUG	23085-23160	-25.2
903	>MT358637.1_452	AACUGUUUGUGGACCUAAAAAGUCUACUAAUUUGGUUAAAAACAAAUGUGUCAAUUUCAACUUCAAUGGUUUAACAGGCACAGGUGUUCUUACUGAGUCUAACAAAAAGUU	23127-23237	-27.9
905	>MT358637.1_453	AAAGUCUACUAAUUUGGUUAAAAACAAAUGUGUCAAUUUCAACUUCAAUGGUUUAACAGGCACAGGUGUUCUUACUGAGUCUAACAAAAAGUUUCUGCCUUU	23145-23246	-25.3
907	>MT358637.1_454	CAGGUGUUCUUACUGAGUCUAACAAAAAGUUUCUGCCUUUCCAACAAUUUGGCAGAGACAUUGCUGACACUACUGAUGCUGUCCGUGAUCCACAGACACUUG	23207-23308	-25.2
909	>MT358637.1_455	ACAGGUGUUCUUACUGAGUCUAACAAAAAGUUUCUGCCUUUCCAACAAUUUGGCAGAGACAUUGCUGACACUACUGAUGCUGU	23206-23288	-23.1
911	>MT358637.1_456	CUGACACUACUGAUGCUGUCCGUGAUCCACAGACACUUGAGAUUCUUGACAUUACACCAUGUUCUUUUGGUGGUGUCAG	23270-23348	-19.8
913	>MT358637.1_457	AUGCUGUCCGUGAUCCACAGACACUUGAGAUUCUUGACAUUACACCAUGUUCUUUUGGUGGUGUCAGUGUUAUAACACCAGGAACAAAU	23282-23370	-22.3
915	>MT358637.1_458	CAUGUUCUUUUGGUGGUGUCAGUGUUAUAACACCAGGAACAAAUACUUCUAACCAGGUUGCUGUUCUUUAUCAGGGUGUUAACUGCACAGAAGUCCCUGUUGCUAUUCAUG	23327-23437	-33.5
917	>MT358637.1_459	UGUUGCUAUUCAUGCAGAUCAACUUACUCCUACUUGGCGUGUUUAUUCUACAGGUUCUAAUGUUUUUCAAACACGUGCAGGCUGUUUAAUAGGGGCUGAACAUGUCAACA	23424-23533	-28.1
919	>MT358637.1_460	UACUCCUACUUGGCGUGUUUAUUCUACAGGUUCUAAUGUUUUUCAAACACGUGCAGGCUGUUUAAUAGGGGCUGAACAUGUCAACAACUCAUAUGAGUG	23448-23546	-28.9
921	>MT358637.1_461	GUUUUUCAAACACGUGCAGGCUGUUUAAUAGGGGCUGAACAUGUCAACAACUCAUAUGAGUGUGACAUACCCAUUGGUGCAGGUAUAUGCGCUAGUUAUCAGAC	23485-23588	-28
923	>MT358637.1_462	AGUUAUCAGACUCAGACUAAUUCUCCUCGGCGGGCACGUAGUGUAGCUAGUCAAUCCAUCAUUGCCUACACUAUGUCACUUGGUGCAGAAAAUUCAGUUGCUUACUCUAAUAACU	23578-23692	-40.3
925	>MT358637.1_463	CUUGGUGCAGAAAAUUCAGUUGCUUACUCUAAUAACUCUAUUGCCAUACCCACAAAUUUUACUAUUAGUGUUACCACAGAAAUUCUACCAGUGUCUAUGACCAAG	23656-23760	-24.8
927	>MT358637.1_464	UUACUAUUAGUGUUACCACAGAAAUUCUACCAGUGUCUAUGACCAAGACAUCAGUAGAUUGUACAAUGUACAUUUGUGGUGAUUCAACUGAAUGCAGCAA	23714-23813	-23.6
929	>MT358637.1_465	GUACAAUGUACAUUUGUGGUGAUUCAACUGAAUGCAGCAAUCUUUUGUUGCAAUAUGGCAGUUUUUGUACACAAUUAAACCGUGCUUUAAC	23774-23864	-24.4
931	>MT358637.1_466	GCAGCAAUCUUUUGUUGCAAUAUGGCAGUUUUUGUACACAAUUAAACCGUGCUUUAACUGGAAUAGCUGU	23807-23876	-17.3
933	>MT358637.1_467	UUUUGUUGCAAUAUGGCAGUUUUUGUACACAAUUAAACCGUGCUUUAACUGGAAUAGCUGUUGAACAAGA	23816-23885	-17
935	>MT358637.1_468	AAUAGCUGUUGAACAAGACAAAAACACCCAAGAAGUUUUUGCACAAGUCAAACAAAUUUACAAAACACCACCAAUUAAAGAUUUUGGUGGUUUUAAUUUUUCACAAAUAUU	23868-23978	-19.1
937	>MT358637.1_469	GAUUUUGGUGGUUUUAAUUUUUCACAAAUAUUACCAGAUCCAUC	23947-23990	-10
939	>MT358637.1_470	AUUACCAGAUCCAUCAAAACCAAGCAAGAGGUCAUUUAUUGAAGAUCUACUUUUCAACAAAGUGACACUUGCAGAUGCUGGCUUCAUCAAACAAUAUGGUGAU	23976-24078	-29.2
941	>MT358637.1_471	GCAGAUGCUGGCUUCAUCAAACAAUAUGGUGAUUGCCUUGGUGAUAUUGCUGCUAGAGACCUCAUUUGUGCACAAAAGUUUAACGGCCUUACUGUUUUGCCACCUUUGC	24046-24154	-31.6
943	>MT358637.1_472	UGCUAGAGACCUCAUUUGUGCACAAAAGUUUAACGGCCUUACUGUUUUGCCACCUUUGCUCACAGAUGAAAUGAUUGCUCAAUACA	24096-24181	-24.2
945	>MT358637.1_473	CAGAUGAAAUGAUUGCUCAAUACACUUCUGCACUGUUAGCGGGUACAAUCACUUCUGGUUGGACCUUUGGUGCAGGUGCUGCAUUACAAAUACCAUUUG	24158-24256	-31
947	>MT358637.1_474	UUCUGGUUGGACCUUUGGUGCAGGUGCUGCAUUACAAAUACCAUUUGCUAUGCAAAUGGCUUAUAGGUUUAAUGGUAUUGGAGUUACACAGAAUGUUCUCUAUGAGAA	24210-24317	-26.5
949	>MT358637.1_475	UGGUUGGACCUUUGGUGCAGGUGCUGCAUUACAAAUACCAUUUGCUAUGCAAAUGGCUUAUAGGUUUAAUGGUAUUGGAGUUACACAGAAUGUUCUCUAUGAGAACCA	24213-24320	-29.3
951	>MT358637.1_476	AGGUUUAAUGGUAUUGGAGUUACACAGAAUGUUCUCUAUGAGAACCAAAAAUUGAUUGCCAACCAAUUUAAUAGUGCUAUUGGCAAAAUUCAAGACUCACUU	24274-24375	-16.7
953	>MT358637.1_477	AGCAAGUGCACUUGGAAAACUUCAAGAUGUGGUCAACCAAAAUGCACAAGCU	24384-24435	-19.3
955	>MT358637.1_478	AGUGCACUUGGAAAACUUCAAGAUGUGGUCAACCAAAAUGCACAAGCUUUAAACACGCUUGUUAAACAACUUAGCUCCAAUUUUGGUGCAAUUUCAAGUGUUUU	24388-24491	-31.9
957	>MT358637.1_479	GCUUGUUAAACAACUUAGCUCCAAUUUUGGUGCAAUUUCAAGUGUUUUAAAUGAUAUCCUUUCACGUCUUGACAAAGUUGAGGCUGAAGUGCAAAUUGAUAGGU	24444-24547	-29.8
959	>MT358637.1_480	AGUUGAGGCUGAAGUGCAAAUUGAUAGGUUGAUCACAGGCAGACUUCAAAGUUUGCAGACAUAUGUGACUCAACAAUUAAUUAGAGCUGCAGAAAUCAGAGCUUCUGCU	24519-24627	-38.7
961	>MT358637.1_481	GGUUGAUCACAGGCAGACUUCAAAGUUUGCAGACAUAUGUGACUCAACAAUUAAUUAGAGCUGCAGAAAUCAGAGCUUCUGCUAAUCUUGCU	24545-24636	-29
963	>MT358637.1_482	AGCUGCAGAAAUCAGAGCUUCUGCUAAUCUUGCUGCUACUAAAAUGUCAGAGUGUGUACUUGGACAAUCAAAAAGAGUUGAUUUUUGUGGAAAGGGCU	24603-24700	-25.9
965	>MT358637.1_483	GUCAGAGUGUGUACUUGGACAAUCAAAAAGAGUUGAUUUUUGUGGAAAGGGCUAUCAUCUUAUGUCCUUCCCUCAGUCAGCACCUCAUGGUGUAGUCUUCUUGCAUGUGAC	24648-24758	-36.6
967	>MT358637.1_484	CAGUCAGCACCUCAUGGUGUAGUCUUCUUGCAUGUGACUUAUGUCCCUGCACAAGAAAAGAACUUCACAACUGCUCCUG	24721-24799	-22.5
969	>MT358637.1_485	UGUCCCUGCACAAGAAAAGAACUUCACAACUGCUCCUGCCAUUUGUCAUGAUGGAAAAGCACACUUUCCUCGUGAAGGUGUCUUUGUUUCAAAUGGCACACA	24762-24863	-30.5
971	>MT358637.1_486	GUGAAGGUGUCUUUGUUUCAAAUGGCACACACUGGUUUGUAACACAAAGGAAUUUUUAUGAACCACAAAUCAU	24833-24905	-11.7
973	>MT358637.1_487	AAUUUUUAUGAACCACAAAUCAUUACUACAGACAACACAUUUGUGUCUGGUAACUGUGAUGUUGUAAUAGGAAUU	24883-24957	-17.7
975	>MT358637.1_488	UGUGUCUGGUAACUGUGAUGUUGUAAUAGGAAUUGUCAACAACACAGUUUAUGAUCCUUUGCAACCUGAAUUAGACUCA	24924-25002	-21.5
977	>MT358637.1_489	GUCAACAACACAGUUUAUGAUCCUUUGCAACCUGAAUUAGACUCAUUCAAGGAGGAGUUAGAUAAAUAUUUUAAGAAUCAUACAUCACCAGAUGUUGAU	24958-25056	-23.4
979	>MT358637.1_490	UGAUCCUUUGCAACCUGAAUUAGACUCAUUCAAGGAGGAGUUAGAUAAAUAUUUUAAGAAUCAUACAUCACCAGAUGUUGAUUUAGGUGACAUCUCUGGCAUUA	24975-25078	-23.4
981	>MT358637.1_491	GAUUUAGGUGACAUCUCUGGCAUUAAUGCUUCAGUUGUAAACAUUCAAAAAGAAAUUGACCGCCUCAAUGAGGUUGCCAAGAAUUUAAAUGAAUC	25054-25148	-25.8
983	>MT358637.1_492	GACCGCCUCAAUGAGGUUGCCAAGAAUUUAAAUGAAUCUCUCAUCGAUCUCCAAGAACUUGGAAAGUAUGAGCAGUAUAUAAAAUGGCCAUGGUACAUUUGGCUAGGUU	25111-25219	-32
985	>MT358637.1_493	UCUCCAAGAACUUGGAAAGUAUGAGCAGUAUAUAAAAUGGCCAUGGUACAUUUGGCUAGGUUUUAUAGCUGGCUUGAUUGCCAUAGUAAUGGUGA	25158-25252	-28.1
987	>MT358637.1_494	AAAGUAUGAGCAGUAUAUAAAAUGGCCAUGGUACAUUUGGCUAGGUUUUAUAGCUGGCUUGAUUGCCAUAGUAAUGGUGACAAUUAUGCUUU	25173-25264	-28.1
989	>MT358637.1_495	GCAGUAUAUAAAAUGGCCAUGGUACAUUUGGCUAGGUUUUAUAGCUGGCUUGAUUGCCAUAGUAAUGGUGACAAUUAUGCUUUGCUGUAUGACCAGUUGCUGU	25182-25284	-29.4
991	>MT358637.1_496	UAGGUUUUAUAGCUGGCUUGAUUGCCAUAGUAAUGGUGACAAUUAUGCUUUGCUGUAUGACCAGUUGCUGUAGUUGUCUCAAGGGCUGUUGUUCUUGUGGAUCCUG	25214-25319	-32.3
993	>MT358637.1_497	UGACAAUUAUGCUUUGCUGUAUGACCAGUUGCUGUAGUUGUCUCAAGGGCUGUUGUUCUUGUGGAUCCUGCUGCAAAUUUGAUGAAGACGACUCUGAGCCAGUGCUCA	25250-25357	-33.6
995	>MT358637.1_498	CUUUGCUGUAUGACCAGUUGCUGUAGUUGUCUCAAGGGCUGUUGUUCUUGUGGAUCCUGCUGCAAAUUUGAUGAAGACGACUCUGAGCCAGUGCUCAAAGGAG	25261-25363	-29.2
997	>MT358637.1_499	CCAGUGCUCAAAGGAGUCAAAUUACAUUACACAUAAACGAACUUAUGGAUUUGUUUAUGAGAAUCUUCACAAUUGG	25348-25423	-19.4
999	>MT358637.1_500	UGAGAAUCUUCACAAUUGGAACUGUAACUUUGAAGCAAGGUGAAAUCAAGGAUGCUACUCCUUCAGAUUUUGUUCGCGCUACUGCAACGAUACCGAUACAAGCCUCA	25405-25511	-29
1001	>MT358637.1_501	UGCAACGAUACCGAUACAAGCCUCACUCCCUUUCGGAUGGCUUAUUGUUGGCGUUGCA	25487-25544	-25
1003	>MT358637.1_502	UUCUUGCUGUUUUUCAGAGCGCUUCCAAAAUCAUAACCCUCAAAAAGAGAUGGCAACUAGCACUCUCCAAGGG	25546-25618	-16.6
1005	>MT358637.1_503	GGCAACUAGCACUCUCCAAGGGUGUUCACUUUGUUUGCAACUUGCUGUUGUUGUUUGUAACAGUUUACUCACACCUUUUGCUCGUUGCUGCUGGCC	25597-25692	-33.7
1007	>MT358637.1_504	CGUUGCUGCUGGCCUUGAAGCCCCUUUUCUCUAUCUUUAUGCUUUAGUCUACUUCUUGCAGAGUAUAAACUUUGUAAGAAUAAUAAUGAGGCUUUGGCUUUGCUGGAAAUG	25679-25789	-34.4
1009	>MT358637.1_505	GAAGCCCCUUUUCUCUAUCUUUAUGCUUUAGUCUACUUCUUGCAGAGUAUAAACUUUGUAAGAAUAAUAAUGAGGCUUUGGCUUUGCUGGAAAUGCCGUUC	25695-25795	-30.1
1011	>MT358637.1_506	ACUUUAUGAUGCCAACUAUUUUCUUUGCUGGCAUACUAAUUGU	25808-25850	-11.7
1013	>MT358637.1_507	CCUUACAAUAGUGUAACUUCUUCAAUUGUCAUUACUUCAGGUGAUGGCACAACAAGUCCUAUUUCUGAACAUGACUACCAGAUUGGUGGUUAUACUGAAAAAUGGG	25866-25971	-34.7
1015	>MT358637.1_508	GAUUGGUGGUUAUACUGAAAAAUGGGAAUCUGGAGUAAAAGACUGUGUUGUAUUACACAGUUACUUCACUUCAGACUAUUACCAGCUGUACUCAACUCAAUU	25946-26047	-34.9
1017	>MT358637.1_509	UGUUGUAUUACACAGUUACUUCACUUCAGACUAUUACCAGCUGUACUCAACUCAAUUGAGUACAGACACUGGUGUUGAACAUGUUACCUUCUUCAUCUACAAUA	25991-26094	-32.5
1019	>MT358637.1_510	GACACUGGUGUUGAACAUGUUACCUUCUUCAUCUACAAUAAAAUUGUU	26055-26102	-10.7
1021	>MT358637.1_511	GUGUUGAACAUGUUACCUUCUUCAUCUACAAUAAAAUUGUUGAUGAGCCUGAAGAACAU	26062-26120	-14
1023	>MT358637.1_512	AAGAACAUGUCCAAAUUCACACAAUCGACGGUUCAUCCGGAGUUGUUAAUCCAGUAAUGGAACCAAUUUAUGAUGAACCGACGACGACUACUAGCGUGCCUU	26113-26214	-37
1025	>MT358637.1_513	UGCCUUUGUAAGCACAAGCUGAUGAGUACGAACUUAUGUACUCAUUCGUUUCGGAAGAGACAGGUACGUUAAUAGUUAAUAGCGUACUUCUUUUUCUUGCUUUCGUGGUA	26209-26318	-36.6
1027	>MT358637.1_514	GGUACGUUAAUAGUUAAUAGCGUACUUCUUUUUCUUGCUUUCGUGGUAUUCUUGCUAGUUACACUAGCCAUCCUUACUGCGCUUCGAUUGUGUGCGUACU	26271-26370	-30.2
1029	>MT358637.1_515	UUACACUAGCCAUCCUUACUGCGCUUCGAUUGUGUGCGUACUGCUGCAAUAUUGUUAACGUGA	26329-26391	-12.7
1031	>MT358637.1_516	GCUUCGAUUGUGUGCGUACUGCUGCAAUAUUGUUAACGUGAGUCUUGUAAAACCUUCUUUUUACGUUUACUCUCGUGU	26351-26428	-16.9
1033	>MT358637.1_517	UGUUAAAAAUCUGAAUUCUUCUAGAGUUCCUGAUCUUCUGGUCUAAACGAACUAAAUAUUAUAUUAGUUUUUCUGUUUGGAACUUUAAUUUUAGCCAUGGCA	26426-26527	-25
1035	>MT358637.1_518	AUUAUAUUAGUUUUUCUGUUUGGAACUUUAAUUUUAGCCAUGGCAGAUUCCAACGGUACUAUUACCGU	26483-26550	-14.6
1037	>MT358637.1_519	UAUUAGUUUUUCUGUUUGGAACUUUAAUUUUAGCCAUGGCAGAUUCCAACGGUACUAUUACCGUUGAAGAGCUUAAAAAGCUCCUUGAACAAUGGAACCUAGUA	26487-26590	-24.6
1039	>MT358637.1_520	GAACAAUGGAACCUAGUAAUAGGUUUCCUAUUCCUUACAUGGAUUUGUCUUCUACAAUUUGCCUAUGCCAACAGGAAUAGGUUUUUGUAUAUAAUUAAGUUAAUUUUC	26573-26680	-27.1
1041	>MT358637.1_521	ACAAUUUGCCUAUGCCAACAGGAAUAGGUUUUUGUAUAUAAUUAAGUUAAUUUUCCUCUGGCUGUUAUGGCCAGUAACUUUAGCUUGUUUUGUGCUUGCUGCUGU	26626-26730	-27.5
1043	>MT358637.1_522	CCAACAGGAAUAGGUUUUUGUAUAUAAUUAAGUUAAUUUUCCUCUGGCUGUUAUGGCCAGUAACUUUAGCUUGUUUUGUGCUUGCUGCUGUUUACAGAAUAAAUUGG	26640-26746	-30.1
1045	>MT358637.1_523	GAUCACCGGUGGAAUUGCUAUCGCAAUGGCUUGUCUUGUAGGCUUGAUGUGGCUCAGCUACUUCAUUGCUUCUUUCAGACUGUUUGCGCGUACGCGUUCCAUGUGGUC	26746-26853	-42
1047	>MT358637.1_524	UUCUGACCAGACCGCUUCUAGAAAGUGAACUCGUAAUCGGAGCUGUGAUCCUUCGUGGACAUCUUCGUAUUGCUGGACACCAUCUAGGACGCUGUGACAUCAAGG	26904-27008	-31.3
1049	>MT358637.1_525	AGUGAACUCGUAAUCGGAGCUGUGAUCCUUCGUGGACAUCUUCGUAUUGCUGGACACCAUCUAGGACGCUGUGACAUCAAGGACCUGCCUAAAGAAAUCACU	26927-27028	-30.9
1051	>MT358637.1_526	CACCAUCUAGGACGCUGUGACAUCAAGGACCUGCCUAAAGAAAUCACUGUUGCUACAUCACGAACGCUUUCUUAUUACAAAUUGGGAGCUUCGCAGCGUGUAGCAGGUG	26981-27089	-35.8
1053	>MT358637.1_527	AGGACCUGCCUAAAGAAAUCACUGUUGCUACAUCACGAACGCUUUCUUAUUACAAAUUGGGAGCUUCGCAGCGUGUAGCAGGUGACUCAGGUUUU	27006-27100	-30.1
1055	>MT358637.1_528	GACCUGCCUAAAGAAAUCACUGUUGCUACAUCACGAACGCUUUCUUAUUACAAAUUGGGAGCUUCGCAGCGUGUAGCAGGUGACUCAGGUUUUGCUGCAUACAGUC	27008-27113	-31
1057	>MT358637.1_529	GUUUUGCUGCAUACAGUCGCUACAGGAUUGGCAACUAUAAAUUAAACACAGACCAUUCCAGUAGCAGUGAC	27096-27166	-14.9
1059	>MT358637.1_530	AGUAGCAGUGACAAUAUUGCUUUGCUUGUACAGUAAGUGACAACAGAUGUUUCAUCUCGUUGACUUUCAGGUUACUAUAGCAGAGAUAUUACU	27155-27247	-20.5
1061	>MT358637.1_531	GGUUACUAUAGCAGAGAUAUUACUAAUUAUUAUGAGGACUUUUAAAGUUUCCAUUUGGAAUCUUGAUUACAUCAUAAACCUCAUAAUUAAAAAUUUAUCUAAGUCACUAACU	27224-27335	-25.6
1063	>MT358637.1_532	GAUGAAGAGCAACCAAUGGAGAUUGAUUAAACGAACAUGAAAAUUAUUCUUUUCUUGGCACUGAUAACACUCGCUACUUGUGAGCUUUAUC	27357-27447	-20.8
1065	>MT358637.1_533	UUCUUUUCUUGGCACUGAUAACACUCGCUACUUGUGAGCUUUAUCACUACCAAGAGUGUGUUAGAG	27403-27468	-26.2
1067	>MT358637.1_534	UUCUUUUCUUGGCACUGAUAACACUCGCUACUUGUGAGCUUUAUCACUACCAAGAGUGUGUUAGAGGUACAACAGUACUUUUAAAAGAA	27403-27491	-21.8
1069	>MT358637.1_535	GUGAGCUUUAUCACUACCAAGAGUGUGUUAGAGGUACAACAGUACUUUUAAAAGAACCUUGCUCUUCUGGAACAUACGAGGGCAAUUCAC	27436-27525	-20.1
1071	>MT358637.1_536	GUGUGUUAGAGGUACAACAGUACUUUUAAAAGAACCUUGCUCUUCUGGAACAUACGAGGGCAAUUCACCAUUUCAUCCUCUAGCUGAU	27458-27545	-21.7
1073	>MT358637.1_537	GUGUUAGAGGUACAACAGUACUUUUAAAAGAACCUUGCUCUUCUGGAACAUACGAGGGCAAUUCACCAUUUCAUCCUCUAGCUGAUAACAAAUUUGCACUGACUUGCUUUAGCAC	27460-27574	-29.3
1075	>MT358637.1_538	GCUGAUAACAAAUUUGCACUGACUUGCUUUAGCACUCAAUUUGCUUUUGCUUGUCCUGACGGC	27540-27602	-17.3
1077	>MT358637.1_539	CUCAAUUUGCUUUUGCUUGUCCUGACGGCGUAAAACACGUCUAUCAGUUACGUGCCAGAUCAGUUUCACCUAAACUGUUCAUCAGACAAGAGGAAGUUCAAG	27574-27675	-24.4
1079	>MT358637.1_540	GGAAGUUCAAGAACUUUACUCUCCAAUUUUUCUUAUUGUUGCGGCAAUAGUGUUUAUAACACUUUGCUUCACACUCAAAAGAAAGACAGAAUGAUUGAACUUUC	27665-27768	-35
1081	>MT358637.1_541	CAAAAGAAAGACAGAAUGAUUGAACUUUCAUUAAUUGACUUCUAUUUGUGCUUUUUAGCCUUUCUGCUAUUCCUUG	27740-27815	-16
1083	>MT358637.1_542	UUUUAGCCUUUCUGCUAUUCCUUGUUUUAAUUAUGCUUAUUAUCUUUUGGUUCUCACUUGAACUGCAAGAUCAUAAUGAAACUUGUCACGCCUAAACGAACAUGAAA	27792-27898	-21.6
1085	>MT358637.1_543	UGGUUCUCACUUGAACUGCAAGAUCAUAAUGAAACUUGUCACGCCUAAACGAACAUGAAAUUUCUUGUUUUCUUAGGAAUCA	27839-27920	-20
1087	>MT358637.1_544	AGGAAUCAUCACAACUGUAGCUGCAUUUCACCAAGAAUGUAGUUUACAGUCAUGUACUCAACAUCAACCAUAUGUAGUUGAUGACCCGUGUCCU	27913-28006	-25.7
1089	>MT358637.1_545	UCAACCAUAUGUAGUUGAUGACCCGUGUCCUAUUCACUUCUAUUCUAAAUGGUAUAUUAGAGUAGGAGCUAGAAAAUCAGCACCUUUAAUUGAAUUGUGCGUGGAUGA	27976-28083	-33.3
1091	>MT358637.1_546	GUAGGAGCUAGAAAAUCAGCACCUUUAAUUGAAUUGUGCGUGGAUGAGGCUGGUUCUAAAUCACCCAUUCAGUACAUCGAUAUCGGUAAUUAUACAGUUUCCUGUUUACCUUUUAC	28037-28152	-24.6
1093	>MT358637.1_547	AAUCACCCAUUCAGUACAUCGAUAUCGGUAAUUAUACAGUUUCCUGUUUACCUUUUACAAUUAAUUGCCAGGAACCUAAAUUGGGUAGUCUUGUAGUGCGUUGUUCGUU	28095-28203	-23.6
1095	>MT358637.1_548	GUUUACCUUUUACAAUUAAUUGCCAGGAACCUAAAUUGGGUAGUCUUGUAGUGCGUUGUUCGUUCUAUGAAGACUUUUUAGAGUAUCAUGACGUUCGUGUUGUUUUAGAU	28140-28249	-24.7
1097	>MT358637.1_549	GUCUUGUAGUGCGUUGUUCGUUCUAUGAAGACUUUUUAGAGUAUCAUGACGUUCGUGUUGUUUUAGAUUUCAUCUAAACGAACAAACUAAAAUGUCUGAUAAUGGAC	28182-28288	-25.8
1099	>MT358637.1_550	UGCGUUGUUCGUUCUAUGAAGACUUUUUAGAGUAUCAUGACGUUCGUGUUGUUUUAGAUUUCAUCUAAACGAACAAACUAAAAUGUCUGAUAAUGGACCCCA	28191-28292	-23.2
1101	>MT358637.1_551	UGGUGGACCCUCAGAUUCAACUGGCAGUAACCAGAAUGGAGAACGCAGUGGGGCGCGAUCAAAACAACGUCGACCCCAAGGUUUACCCAAUAAUACUGCGUCUUGGUUCACCG	28323-28435	-46.1
1103	>MT358637.1_552	UUGGUUCACCGCUCUCACUCAACAUGGCAAGGAAGACCUUAAAUUCCCUCGAGGACAAGGCGUUCCAAUUAACACCAAUAGCAGUCCAGAUGACCAA	28425-28521	-28.6
1105	>MT358637.1_553	GAAGAGCUACCAGACGAAUUCGUGGUGGUGACGGUAAAAUGAAAGAUCUCAGUCCAAGAUGGUAUUUCUACUACCUAGGAACUGGGCCAGAAGCUGGACUUC	28535-28636	-28.3
1107	>MT358637.1_554	GGGCCAGAAGCUGGACUUCCCUAUGGUGCUAACAAAGACGGCAUCAUAUGGGUUGCAACUGAGGGAGCCU	28618-28687	-20.7
1109	>MT358637.1_555	GCCAGAAGCUGGACUUCCCUAUGGUGCUAACAAAGACGGCAUCAUAUGGGUUGCAACUGAGGGAGCCUUGAAUACACCAAAAGAUCACAUUGGC	28620-28713	-27.8
1111	>MT358637.1_556	GGGUUGCAACUGAGGGAGCCUUGAAUACACCAAAAGAUCACAUUGGCACCCGCAAUCC	28667-28724	-19
1113	>MT358637.1_557	GAACAACAUUGCCAAAAGGCUUCUACGCAGAAGGGAGCAGAGGCGGCAGUCAAGCCUCUUCUCGUUCCUCAUCACGUAGUCGCAACAGUUC	28763-28853	-30.8
1115	>MT358637.1_558	GUUCCUCAUCACGUAGUCGCAACAGUUCAAGAAAUUCAACUCCAGGCAGCAGUAGGGGAAC	28826-28886	-15.2
1117	>MT358637.1_559	GGCAGCAGUAGGGGAACUUCUCCUGCUAGAAUGGCUGGCAAUGGCGGUGAUGCUGCU	28870-28926	-25.1
1119	>MT358637.1_560	UGGCUGGCAAUGGCGGUGAUGCUGCUCUUGCUUUGCUGCUGCUUGACAGAUUGAACCAGCUUGAGAGCAAAAUGUCUGGUAAAGGCCAACAACAACAAGGCCA	28901-29003	-30.7
1121	>MT358637.1_561	AGCUUGAGAGCAAAAUGUCUGGUAAAGGCCAACAACAACAAGGCCAAACUGUCACUAAGAAAUCUGCUGCUGAGGCU	28958-29034	-23.9
1123	>MT358637.1_562	CCAGGAACUAAUCAGACAAGGAACUGAUUACAAACAUUGGCCGCAAAUUGCACAAUUUGCCCCCAGCGCUUCAGCGUUCUUCGGAAUGUCGCGCAUUGGCAUGG	29136-29239	-27.7
1125	>MT358637.1_563	CAAUUUGCCCCCAGCGCUUCAGCGUUCUUCGGAAUGUCGCGCAUUGGCAUGGAAGUCACACCUUCGGGAACGUGGUUGACCUACACAGGUGCCAUCAAAUUG	29188-29289	-25.5
1127	>MT358637.1_564	UGUCGCGCAUUGGCAUGGAAGUCACACCUUCGGGAACGUGGUUGACCUACACAGGUGCCAUCAAAUUGGAUGACA	29222-29296	-22.8
1129	>MT358637.1_565	UGACCUACACAGGUGCCAUCAAAUUGGAUGACAAAGAUCCAAAUUUCAAAGAUCAAGUCA	29264-29323	-11.6
1131	>MT358637.1_566	UGAUGAAACUCAAGCCUUACCGCAGAGACAGAAGAAACAGCAAACUGUGAUUCUUCUUCCUGCUGCAGAUUUGGAUGAUUUCUCCA	29400-29485	-23.2
1133	>MT358637.1_567	UCUUCCUGCUGCAGAUUUGGAUGAUUUCUCCAAACAAUUGCAACAAUCCAUGAGCAGUGCUGA	29454-29516	-14.6
1135	>MT358637.1_568	UUGCAACAAUCCAUGAGCAGUGCUGACUCAACUCAGGCCUAAACUCAUGCAG	29491-29542	-10.7
1137	>MT358637.1_569	GCCUAAACUCAUGCAGACCACACAAGGCAGAUGGGCUAUAUAAACGUUUUCGCUUUUCCGUUUACGAUAUAUAGUCUACUCUUGUGCAGAAUGAAUUCUCGU	29527-29628	-33
1139	>MT358637.1_570	AUAUAGUCUACUCUUGUGCAGAAUGAAUUCUCGUAACUACAUAGCACAAGUAGAUGUAGU	29595-29654	-15.8
1141	>MT358637.1_571	AGAUGUAGUUAACUUUAAUCUCACAUAGCAAUCUUUAAUCAGUGUGUAACAUUAGGGAGGACUUGAAAGAGCCACCACAUUU	29646-29727	-17.3
1143	>MT358637.1_572	UAGGGAGGACUUGAAAGAGCCACCACAUUUUCACCGAGGCCACGCGGAGUACGAUCGAGUGUACAGUGAACAAUGCUAGGGAGAGCUGCCUA	29698-29789	-22.9
1145	>MT358637.1_573	UUUUCACCGAGGCCACGCGGAGUACGAUCGAGUGUACAGUGAACAAUGCUAGGGAGAGCUGCCUAUAUGGAAG	29725-29797	-19.2
1147	>MT358637.1_574	CUAGGGAGAGCUGCCUAUAUGGAAGAGCCCUAAUGUGUAAAAUUAAUUUUAGUAGUGCUAUCCCCAUGUGAUUUUAAUAGCUUCUUAG	29773-29860	-21.4

## Sheet: Duplex SVM
miRNA fold					MiRduplexSVM
S.N.	Sequence ID	Sequence	Location in genome	MFE		5strandMature	3strandMature	miRNA coding potential	Selected Pre-MiRNA
1	>MT358637.1_1	UGUUCUCUAAACGAACUUUAAAAUCUGUGUGGCUGUCACUCGGCUGCAUGCUUAGUGCACUCACGCAGUAUAAUUAAUAACUAAUUACUGUCGUUGACAGGACA	59-162	-28.9	>MT358637.1_1	UUUAAAAUCUGUGUGGCUGUCA	UCACGCAGUAUAAUUAAUAAC	Yes	Yes
3	>MT358637.1_2	UCUGUUCUCUAAACGAACUUUAAAAUCUGUGUGGCUGUCACUCGGCUGCAUGCUUAGUGCACUCACGCAGUAUAAUUAAUAACUAAUUACUGUCGUUGACAGG	57-159	-29.2	>MT358637.1_2	UUUAAAAUCUGUGUGGCUGUCA	UCACGCAGUAUAAUUAAUAAC	Yes	Yes
5	>MT358637.1_3	AUCUGUGUGGCUGUCACUCGGCUGCAUGCUUAGUGCACUCACGCAGUAUAAUUAAUAACUAAUUACUGUCGUUGACAGGACACGAGU	81-167	-27.1	>MT358637.1_3	Multibranch-No prediction	Multibranch-No prediction	No	No		hairpins	447
7	>MT358637.1_4	AGGCUGCUUACGGUUUCGUCCGUGUUGCAGCCGAUCAUCAGCACAUCUAGGUUUUGUCCGGGUGUGACCGAAAGGUAAGAUGGAGAGCCU	186-275	-25.3	>MT358637.1_4	Multibranch-No prediction	Multibranch-No prediction	No	No		duplex svm prediction	272
9	>MT358637.1_5	CUCGUCUAUCUUCUGCAGGCUGCUUACGGUUUCGUCCGUGUUGCAGCCGAUCAUCAGCACAUCUAGGUUUUGUCCGGGUGUGACCGAAAGGUAAGAUGGAGAG	170-272	-30.3	>MT358637.1_5	Multibranch-No prediction	Multibranch-No prediction	No	No
11	>MT358637.1_6	UGUUGCAGCCGAUCAUCAGCACAUCUAGGUUUUGUCCGGGUGUGACCGAAAGGUAAGAUGGAGAGCCUUGUCCCUGGUUUCAACG	208-292	-24	>MT358637.1_6	AGCACAUCUAGGUUUUGUCCGGGU	GAUGGAGAGCCUUGUCCCUGG	Yes	Yes
15	>MT358637.1_8	AUGGAGAGCCUUGUCCCUGGUUUCAACGAGAAAACACACGUCCAACUCAGUUUGCCUGUUUUACAGGUUCGCGACGUGCUCGUACGUGGCUUUGGAGACUCCGU	265-368	-35.7	>MT358637.1_8	ACGAGAAAACACACGUCCAACU	UUCGCGACGUGCUCGUACGUGG	Yes	Yes
17	>MT358637.1_9	CUGUUUUACAGGUUCGCGACGUGCUCGUACGUGGCUUUGGAGACUCCGUGGAGGAGGUCUUAUCAGAGGCACGUCAACAUCUUAAAGAUGGCACUUGUGGCUUAG	320-424	-34.8	>MT358637.1_9	UGCUCGUACGUGGCUUUGGAG	UAUCAGAGGCACGUCAACAUC	Yes	Yes
19	>MT358637.1_10	CAGUUUGCCUGUUUUACAGGUUCGCGACGUGCUCGUACGUGGCUUUGGAGACUCCGUGGAGGAGGUCUUAUCAGAGGCACGUCAACAUCUUAAAGAUGGCACUUG	312-416	-34	>MT358637.1_10	Multibranch-No prediction	Multibranch-No prediction	No	No
21	>MT358637.1_11	GAGGCACGUCAACAUCUUAAAGAUGGCACUUGUGGCUUAGUAGAAGUUGAAAAAGGCGUUUUGCCUC	385-451	-20.2	>MT358637.1_11	Multibranch-No prediction	Multibranch-No prediction	No	No
23	>MT358637.1_12	GUUUUGCCUCAACUUGAACAGCCCUAUGUGUUCAUCAAACGUUCGGAUGCUCGAACUGCACCUCAUGGUCAUGUUAUGGUUGAGCUGGUAGCAGAAC	442-538	-31.2	>MT358637.1_12	AGCCCUAUGUGUUCAUCAAACGU	UGCACCUCAUGGUCAUGUUAU	Yes	Yes
25	>MT358637.1_13	UGUGUUCAUCAAACGUUCGGAUGCUCGAACUGCACCUCAUGGUCAUGUUAUGGUUGAGCUGGUAGCAGAACUCGAAGGCAUUCAGUACGGUCGUAGUGGUGAGACA	468-573	-33	>MT358637.1_13	GCUCGAACUGCACCUCAUGGU	UAGCAGAACUCGAAGGCAUUCAGU	Yes	Yes
27	>MT358637.1_14	GCACCUCAUGGUCAUGUUAUGGUUGAGCUGGUAGCAGAACUCGAAGGCAUUCAGUACGGUCGUAGUGGUGAGACACUUGGUGU	499-581	-27.8	>MT358637.1_14	UCAUGUUAUGGUUGAGCUGGUA	CAGUACGGUCGUAGUGGUGAGA	Yes	Yes
29	>MT358637.1_15	GCAUUCAGUACGGUCGUAGUGGUGAGACACUUGGUGUCCUUGUCCCUCAUGUGGGCGAAAUACCAGUGGCUUACCGCAAGGUUCUUCUUCGUAAGAACGGU	545-645	-35	>MT358637.1_15	Multibranch-No prediction	Multibranch-No prediction	No	No
31	>MT358637.1_16	UCUUCGUAAGAACGGUAAUAAAGGAGCUGGUGGCCAUAGUUACGGCGCCGAUCUAAAGUCAUUUGACUUAGGCGACGAGCUUGGCACUGAUCCUUAUGAAGA	630-731	-39.2	>MT358637.1_16	AGCUGGUGGCCAUAGUUACGGC	UUUGACUUAGGCGACGAGCUUG	Yes	Yes
33	>MT358637.1_17	UCAUUUGACUUAGGCGACGAGCUUGGCACUGAUCCUUAUGAAGAUUUUCAAGAAAACUGGAACACUAAACAUAGCAGUGGUGUUACCCGUGAACUCAUGCGUGA	688-791	-25.7	>MT358637.1_17	Multibranch-No prediction	Multibranch-No prediction	No	No
35	>MT358637.1_18	ACAUAGCAGUGGUGUUACCCGUGAACUCAUGCGUGAGCUUAACGGAGGGGCAUACACUCGCUAUGU	756-821	-21.1	>MT358637.1_18	CAUAGCAGUGGUGUUACCCGUG	AGGGGCAUACACUCGCUAUGU	Yes	Yes
37	>MT358637.1_19	GAGCUUAACGGAGGGGCAUACACUCGCUAUGUCGAUAACAACUUCUGUGGCCCUGAUGGCUACCCUCUUGAGUGCAUUAAAGACCUUCUAGCACGUGCUGGUAAAGCUU	790-898	-37.7	>MT358637.1_19	Multibranch-No prediction	Multibranch-No prediction	No	No
39	>MT358637.1_20	GUGCUGGUAAAGCUUCAUGCACUUUGUCCGAACAACUGGACUUUAUUGACACUAAGAGGGGUGUAUACUGCUGCCGUGAACAUGAGCAUGAAAUUGCUUGGUAC	884-987	-33.5	>MT358637.1_20	Multibranch-No prediction	Multibranch-No prediction	No	No
49	>MT358637.1_25	AGAAUUCGAUCUGUCUAUCCAGUUGCGUCACCAAAUGAAUGCAACCAAAUGUGCCUUUCAACUCUCAUGAAGUGUGAUCAUUGUGGUGAAACUUCAUGGCAGACGGGCGAUUUU	1159-1272	-34.2	>MT358637.1_25	ACCAAAUGAAUGCAACCAAAUG	UGAAGUGUGAUCAUUGUGGUGA	Yes	Yes
51	>MT358637.1_26	CAAAUGAAUGCAACCAAAUGUGCCUUUCAACUCUCAUGAAGUGUGAUCAUUGUGGUGAAACUUCAUGGCAGACGGGCGAUUUUGUUAAAGCCACUUGCGAAUUUUG	1190-1295	-33.2	>MT358637.1_26	UGCCUUUCAACUCUCAUGAAGU	UUCAUGGCAGACGGGCGAUUUU	Yes	Yes
53	>MT358637.1_27	UGGCAGACGGGCGAUUUUGUUAAAGCCACUUGCGAAUUUUGUGGCACUGAGAAUUUGACUAAAGAAGGUGCCACUACUUGUGGUUACUUACCCCAAAAUGCUGUUGUUA	1255-1363	-32.5	>MT358637.1_27	AAAGCCACUUGCGAAUUUUGU	CACUACUUGUGGUUACUUACC	Yes	Yes
57	>MT358637.1_29	AAUACCAUAAUGAAUCUGGCUUGAAAACCAUUCUUCGUAAGGGUGGUCGCACUAUUGCCUUUGGAGGCUGUGUGUUCUCUUAUGUUGGUUGCCAUAACAAGUGUGCCUAUU	1421-1531	-33.3	>MT358637.1_29	UGAAAACCAUUCUUCGUAAGGG	UUCUCUUAUGUUGGUUGCCAUA	Yes	Yes
59	>MT358637.1_30	GCCUUUGGAGGCUGUGUGUUCUCUUAUGUUGGUUGCCAUAACAAGUGUGCCUAUUGGGUUCCACGUGCUAGCGCUAACAUAGGUUGUAACCAUACAGGUGUUGUUGGAGAAGGUUCCGAAGGU	1477-1599	-41	>MT358637.1_30	UGUUGGUUGCCAUAACAAGUGU	ACGUGCUAGCGCUAACAUAGGU	Yes	Yes
61	>MT358637.1_31	GGUUGCCAUAACAAGUGUGCCUAUUGGGUUCCACGUGCUAGCGCUAACAUAGGUUGUAACCAUACAGGUGUUGUUGGAGAAGGUUCCGAAGGUCUUAAUGACAACC	1507-1612	-32.7	>MT358637.1_31	UUCCACGUGCUAGCGCUAACA	CAGGUGUUGUUGGAGAAGGUUC	Yes	Yes
65	>MT358637.1_33	GAAAUACUCCAAAAAGAGAAAGUCAACAUCAAUAUUGUUGGUGACUUUAAACUUAAUGAAGAGAUCGCCAUUAUUUUGGCAUCUUUUUCUGCUUCCACAAGUGCUUU	1618-1724	-26.5	>MT358637.1_33	Multibranch-No prediction	Multibranch-No prediction	No	No
67	>MT358637.1_34	UUAAUGAAGAGAUCGCCAUUAUUUUGGCAUCUUUUUCUGCUUCCACAAGUGCUUUUGUGGAAACUGUGAAAGGUUUGGAUUAUAAAGCAUUCAA	1670-1763	-22	>MT358637.1_34	Multibranch-No prediction	Multibranch-No prediction	No	No
71	>MT358637.1_36	AGCAUUCAAACAAAUUGUUGAAUCCUGUGGUAAUUUUAAAGUUACAAAAGGAAAAGCUAAAAAAGGUGCCUGGAAUAUUGGUGAACAGAAAUCAAUACUGAGUCCU	1755-1860	-20	>MT358637.1_36	Multibranch-No prediction	Multibranch-No prediction	No	No
73	>MT358637.1_37	AAAGGUGCCUGGAAUAUUGGUGAACAGAAAUCAAUACUGAGUCCUCUUUAUGCAUUUGCAUCAGAGGCUGCUCGUGUUGUACGAUCAAUUUUCUCCCGCACUCUU	1816-1920	-35.1	>MT358637.1_37	AUUGGUGAACAGAAAUCAAUAC	CUCGUGUUGUACGAUCAAUUUU	Yes	Yes
75	>MT358637.1_38	ACAGAAAUCAAUACUGAGUCCUCUUUAUGCAUUUGCAUCAGAGGCUGCUCGUGUUGUACGAUCAAUUUUCUCCCGCACUCUUGAAACUGCUCAAAAUUCUGU	1839-1940	-31.6	>MT358637.1_38	Multibranch-No prediction	Multibranch-No prediction	No	No
77	>MT358637.1_39	AUCAAUUUUCUCCCGCACUCUUGAAACUGCUCAAAAUUCUGUGCGUGUUUUACAGAAGGCCGCUAUAACAAUACUAGAUGGAAUUUCACAGUAUUCACUGAGACUCAUUGAU	1899-2010	-28.5	>MT358637.1_39	GAAACUGCUCAAAAUUCUGUGC	AUGGAAUUUCACAGUAUUCACU	Yes	Yes
83	>MT358637.1_42	UCACUGAGACUCAUUGAUGCUAUGAUGUUCACAUCUGAUUUGGCUACUAACAAUCUAGUUGUAAUGGCCUACAUUACAGGUGGUGUUGUUCAGUUGACUUCGCAGUGG	1993-2100	-30.4	>MT358637.1_42	Multibranch-No prediction	Multibranch-No prediction	No	No
85	>MT358637.1_43	UGCUAUGAUGUUCACAUCUGAUUUGGCUACUAACAAUCUAGUUGUAAUGGCCUACAUUACAGGUGGUGUUGUUCAGUUGACUUCGCAGUGGCUAACUAACAUCUUUGGCA	2010-2119	-33.4	>MT358637.1_43	UGGCUACUAACAAUCUAGUUGU	AGGUGGUGUUGUUCAGUUGACU	Yes	Yes
87	>MT358637.1_44	CAAUCUAGUUGUAAUGGCCUACAUUACAGGUGGUGUUGUUCAGUUGACUUCGCAGUGGCUAACUAACAUCUUUGGCACUGUUUAUGAAAAACUCAAACCCGUCCUUGAUUG	2043-2153	-28.8	>MT358637.1_44	Multibranch-No prediction	Multibranch-No prediction	No	No
89	>MT358637.1_45	GGCCUACAUUACAGGUGGUGUUGUUCAGUUGACUUCGCAGUGGCUAACUAACAUCUUUGGCACUGUUUAUGAAAAACUCAAACCCGUCCUUGAUUGGCU	2058-2156	-25.2	>MT358637.1_45	UGUUCAGUUGACUUCGCAGUGG	ACUGUUUAUGAAAAACUCAAA	Yes	Yes
91	>MT358637.1_46	UAACAUCUUUGGCACUGUUUAUGAAAAACUCAAACCCGUCCUUGAUUGGCUUGAAGAGAAGUUUAAGGAAGGUGUAGAGUUUCUUAGAGACGGUUGGGAAAUUGUUA	2106-2212	-39.6	>MT358637.1_46	UAUGAAAAACUCAAACCCGUCC	AAGGUGUAGAGUUUCUUAGAGA	Yes	Yes
93	>MT358637.1_47	CUUAGAGACGGUUGGGAAAUUGUUAAAUUUAUCUCAACCUGUGCUUGUGAAAUUGUCGGUGGACAAAUUGUCACCUGUGCAAAGGAAAUUAAGGAGAGUGUUCAGACAUUCUUUAAG	2188-2304	-32.2	>MT358637.1_47	Multibranch-No prediction	Multibranch-No prediction	No	No
95	>MT358637.1_48	GCUUGUGAAAUUGUCGGUGGACAAAUUGUCACCUGUGCAAAGGAAAUUAAGGAGAGUGUUCAGACAUUCUUUAAGC	2230-2305	-21.8	>MT358637.1_48	Multibranch-No prediction	Multibranch-No prediction	No	No
99	>MT358637.1_50	UUUUUGGCUUUGUGUGCUGACUCUAUCAUUAUUGGUGGAGCUAAACUUAAAGCCUUGAAUUUAGGUGAAACAUUUGUCACGCACUCAAAGGGAUUGUACAGAAA	2317-2420	-25.9	>MT358637.1_50	Multibranch-No prediction	Multibranch-No prediction	No	No
101	>MT358637.1_51	UUGUACAGAAAGUGUGUUAAAUCCAGAGAAGAAACUGGCCUACUCAUGCCUCUAAAAGCCCCAAAAGAAAUUAUCUUCUUAGAGGGAGAAACACUUCCCACAG	2410-2512	-26.9	>MT358637.1_51	UGUGUUAAAUCCAGAGAAGAA	UUCUUAGAGGGAGAAACACUU	Yes	Yes
105	>MT358637.1_53	AGUUGUCUUGAAAACUGGUGAUUUACAACCAUUAGAACAACCUACUAGUGAAGCUGUUGAAGCUCCAUUGGUUGGUACACCAGUUUGUAUUAACGGGCUUAUGUUGCU	2529-2636	-32.6	>MT358637.1_53	Multibranch-No prediction	Multibranch-No prediction	No	No
107	>MT358637.1_54	UUGAAAACUGGUGAUUUACAACCAUUAGAACAACCUACUAGUGAAGCUGUUGAAGCUCCAUUGGUUGGUACACCAGUUUGUAUUAACGGGCUUAUGUUGCUCGA	2536-2639	-31	>MT358637.1_54	Multibranch-No prediction	Multibranch-No prediction	No	No
111	>MT358637.1_56	UGAUGGUAACAAACAAUACCUUCACACUCAAAGGCGGUGCACCAACAAAGGUUACUUUUGGUGAUGACACUGUGAUAGAAGUGCAAGGUUACAAGAGUGUGAAUAUCA	2681-2788	-35.5	>MT358637.1_56	ACACUCAAAGGCGGUGCACCA	UGAUGACACUGUGAUAGAAGUG	Yes	Yes
113	>MT358637.1_57	GUGCAAGGUUACAAGAGUGUGAAUAUCACUUUUGAACUUGAUGAAAGGAUUGAUAAAGUACUUAAUGAGAAGUGCUCUGCCUAUACAGUUGAACUCGGUAC	2761-2861	-25.5	>MT358637.1_57	Multibranch-No prediction	Multibranch-No prediction	No	No
115	>MT358637.1_58	UUGAUAAAGUACUUAAUGAGAAGUGCUCUGCCUAUACAGUUGAACUCGGUACAGAAGUAAAUGAGUUCGCCUGUGUUGUGGCAGAUGCUGUCAUAAAAACUUUGCAA	2810-2916	-44.2	>MT358637.1_58	UCUGCCUAUACAGUUGAACUCG	AGUUCGCCUGUGUUGUGGCAGA	Yes	Yes
119	>MT358637.1_60	AAUUACUUACACCACUGGGCAUUGAUUUAGAUGAGUGGAGUAUGGCUACAUACUACUUAUUUGAUGAGUCUGGUGAGUUUAAAUU	2927-3011	-20.9	>MT358637.1_60	GGGCAUUGAUUUAGAUGAGUGG	UACUUAUUUGAUGAGUCUGGU	Yes	Yes
121	>MT358637.1_61	GGGCAUUGAUUUAGAUGAGUGGAGUAUGGCUACAUACUACUUAUUUGAUGAGUCUGGUGAGUUUAAAUUGGCUUCACAUAUGUAUUGUUC	2943-3032	-21.9	>MT358637.1_61	Multibranch-No prediction	Multibranch-No prediction	No	No
123	>MT358637.1_62	UUGAUGAGUCUGGUGAGUUUAAAUUGGCUUCACAUAUGUAUUGUUCUUUUUACCCUCCAGAUGAGGAUGAAGAAGAAGGUGAUUGUGAAGAAGAAGAGUUUGAGCCAUCAA	2987-3097	-32.1	>MT358637.1_62	UCACAUAUGUAUUGUUCUUUUU	AAGAAGAAGGUGAUUGUGAAGA	Yes	Yes
125	>MT358637.1_63	UGAAGAAGAAGAGUUUGAGCCAUCAACUCAAUAUGAGUAUGGUACUGAAGAUGAUUACCAAGGUAAACCUUUGGAAUUUGGUGCCACUUCUGCUGCUCUUCA	3072-3173	-22.8	>MT358637.1_63	Multibranch-No prediction	Multibranch-No prediction	No	No
127	>MT358637.1_64	ACCAAGGUAAACCUUUGGAAUUUGGUGCCACUUCUGCUGCUCUUCAACCUGAAGAAGAGCAAGAAGAAGAUUGGUUAGAUGAUGAUAGUCAACAAACUGUUGGU	3128-3231	-33.2	>MT358637.1_64	Multibranch-No prediction	Multibranch-No prediction	No	No
129	>MT358637.1_65	AGCAAGAAGAAGAUUGGUUAGAUGAUGAUAGUCAACAAACUGUUGGUCAACAAGACGGCAGUGAGGACAAUCAGACAACUACUAUUCAAACAAUUGUU	3185-3282	-26.3	>MT358637.1_65	UGGUUAGAUGAUGAUAGUCAAC	CAGUGAGGACAAUCAGACAACU	Yes	Yes
133	>MT358637.1_67	GGACAAUCAGACAACUACUAUUCAAACAAUUGUUGAGGUUCAACCUCAAUUAGAGAUGGAACUUACACCAGUUGUUCAGACUAUUGAAGUGAAUAGUUUUAGUGGUU	3249-3355	-29.1	>MT358637.1_67	Multibranch-No prediction	Multibranch-No prediction	No	No
135	>MT358637.1_68	CUUACUGACAAUGUAUACAUUAAAAAUGCAGACAUUGUGGAAGAAGCUAAAAAGGUAAAACCAACAGUGGUUGUUAAUGCAGCCAAUGUUUACCUUAAACAUGGAG	3364-3469	-24.9	>MT358637.1_68	Multibranch-No prediction	Multibranch-No prediction	No	No
137	>MT358637.1_69	AGUGGUUGUUAAUGCAGCCAAUGUUUACCUUAAACAUGGAGGAGGUGUUGCAGGAGCCUUAAAUAAGGCUACUAACAAUGCCAUGCAAGUUGAAUCUGAUGAUUACAUAGCUACU	3429-3543	-33.7	>MT358637.1_69	Multibranch-No prediction	Multibranch-No prediction	No	No
139	>MT358637.1_70	ACAAUGCCAUGCAAGUUGAAUCUGAUGAUUACAUAGCUACUAAUGGACCACUUAAAGUGGGUGGUAGUUGUGUUUUAAGCGGACACAAUCUUGCUAAACACUGU	3503-3606	-38.6	>MT358637.1_70	UCUGAUGAUUACAUAGCUACU	UAGUUGUGUUUUAAGCGGAC	Yes	Yes
141	>MT358637.1_71	AGUUGUGUUUUAAGCGGACACAAUCUUGCUAAACACUGUCUUCAUGUUGUCGGCCCAAAUGUUAACAAAGGUGAAGACAUUCAACUUCUUAAGAGUGCUUAUGAAAAUU	3568-3676	-34.1	>MT358637.1_71	Multibranch-No prediction	Multibranch-No prediction	No	No
145	>MT358637.1_73	UUAUUAUCAGCUGGUAUUUUUGGUGCUGACCCUAUACAUUCUUUAAGAGUUUGUGUAGAUACUGUUCGCACAAAUGUCUACUUAGCUGUCUUUGAUAA	3706-3803	-28.6	>MT358637.1_73	UGGUAUUUUUGGUGCUGACCCUA	UACUGUUCGCACAAAUGUCUAC	Yes	Yes
147	>MT358637.1_74	CUUAGCUGUCUUUGAUAAAAAUCUCUAUGACAAACUUGUUUCAAGCUUUUUGGAAAUGAAGAGUGAAAAGCAAGUUGAACAAAAGAUCGCUGAGAUUCCUAAAGAGGAAGUUAAG	3786-3900	-37.5	>MT358637.1_74	UGACAAACUUGUUUCAAGCUUU	AGAGUGAAAAGCAAGUUGAACAA	Yes	Yes
149	>MT358637.1_75	UGAAAAGCAAGUUGAACAAAAGAUCGCUGAGAUUCCUAAAGAGGAAGUUAAGCCAUUUAUAACUGAAAGUAAACCUUCA	3849-3927	-20	>MT358637.1_75	UGAACAAAAGAUCGCUGAGAUUC	GAAGUUAAGCCAUUUAUAACU	Yes	Yes
151	>MT358637.1_76	GAUGAUAAGAAAAUCAAAGCUUGUGUUGAAGAAGUUACAACAACUCUGGAAGAAACUAAGUUCCUCACAGAAAACUUGUUACUUUAUAUUGACAUUAAUGGCAAUCUUCAUC	3946-4057	-28.2	>MT358637.1_76	AAGUUACAACAACUCUGGAA	UCACAGAAAACUUGUUACUUUA	Yes	Yes
153	>MT358637.1_77	AAUCAAAGCUUGUGUUGAAGAAGUUACAACAACUCUGGAAGAAACUAAGUUCCUCACAGAAAACUUGUUACUUUAUAUUGACAUUAAUGGCAAUCUUCAUCCAGAUU	3957-4063	-24.5	>MT358637.1_77	Multibranch-No prediction	Multibranch-No prediction	No	No
155	>MT358637.1_78	GUUACAACAACUCUGGAAGAAACUAAGUUCCUCACAGAAAACUUGUUACUUUAUAUUGACAUUAAUGGCAAUCUUCAUCCAGAUUCUGCCACUCUUGUUAGUGAC	3979-4083	-24.1	>MT358637.1_78	Multibranch-No prediction	Multibranch-No prediction	No	No
157	>MT358637.1_79	GACAUUAAUGGCAAUCUUCAUCCAGAUUCUGCCACUCUUGUUAGUGACAUUGACAUCACUUUCUUAAAGAAAGAUGCUCCAUAUAUAGUGGGUGAUGUUGUUCAAGAGGGUGUU	4036-4149	-31.5	>MT358637.1_79	Multibranch-No prediction	Multibranch-No prediction	No	No
159	>MT358637.1_80	GCCACUCUUGUUAGUGACAUUGACAUCACUUUCUUAAAGAAAGAUGCUCCAUAUAUAGUGGGUGAUGUUGUUCAAGAGGGUGUUUUAACUGCUGUGGU	4066-4163	-28.5	>MT358637.1_80	ACAUUGACAUCACUUUCUUAAA	UGGGUGAUGUUGUUCAAGAGG	Yes	Yes
161	>MT358637.1_81	AGAUGCUCCAUAUAUAGUGGGUGAUGUUGUUCAAGAGGGUGUUUUAACUGCUGUGGUUAUACCUACUAAAAAGGCUGGUGGCACUACU	4107-4194	-26.3	>MT358637.1_81	AGUGGGUGAUGUUGUUCAAGA	UGGUUAUACCUACUAAAAAGGC	Yes	Yes
163	>MT358637.1_82	UAACUGCUGUGGUUAUACCUACUAAAAAGGCUGGUGGCACUACUGAAAUGCUAGCGAAAGCUUUGAGAAAAGUGCCAACAGACAAUUAUAUAACCACUUA	4151-4250	-21	>MT358637.1_82	GGCUGGUGGCACUACUGAAAU	UGAGAAAAGUGCCAACAGACAA	Yes	Yes
165	>MT358637.1_83	UACUGAAAUGCUAGCGAAAGCUUUGAGAAAAGUGCCAACAGACAAUUAUAUAACCACUUACCCGGGUCAGGGUUUAAAUGGUUACACUGUAGAGGAGGCAAAGACAGUG	4191-4299	-22.3	>MT358637.1_83	Multibranch-No prediction	Multibranch-No prediction	No	No
167	>MT358637.1_84	GGGUUUAAAUGGUUACACUGUAGAGGAGGCAAAGACAGUGCUUAAAAAGUGUAAAAGUGCCUUUUACAUUCUACCAUCUAUUAUCU	4260-4345	-24.9	>MT358637.1_84	CACUGUAGAGGAGGCAAAGACA	UAAAAGUGCCUUUUACAUUCU	Yes	Yes
171	>MT358637.1_86	UGCCUUUUACAUUCUACCAUCUAUUAUCUCUAAUGAGAAGCAAGAAAUUCUUGGAACUGUUUCUUGGAAUUUGCGAGAAAUGCUUGCACAUGCAGAAGAAACACGCA	4317-4423	-21.4	>MT358637.1_86	Multibranch-No prediction	Multibranch-No prediction	No	No
177	>MT358637.1_89	GUGUGGAAACUAAAGCCAUAGUUUCAACUAUACAGCGUAAAUAUAAGGGUAUUAAAAUACAAGAGGGUGUGGUUGAUUAUGGUGCUAGAUUUUACUUUUACAC	4439-4541	-26.5	>MT358637.1_89	AACUAUACAGCGUAAAUAUAA	AAAUACAAGAGGGUGUGGUUGA	Yes	Yes
183	>MT358637.1_92	GCUAUGUAACACAUGGCUUAAAUUUGGAAGAAGCUGCUCGGUAUAUGAGAUCUCUCAAAGUGCCAGCUACAGUUUCUGUUUCUUCACCUGAUGCUGUUACAGCGU	4616-4720	-31.2	>MT358637.1_92	UUUGGAAGAAGCUGCUCGGUAU	CCAGCUACAGUUUCUGUUUCUU	Yes	Yes
185	>MT358637.1_93	UUUGGAAGAAGCUGCUCGGUAUAUGAGAUCUCUCAAAGUGCCAGCUACAGUUUCUGUUUCUUCACCUGAUGCUGUUACAGCGUAUAAUGGUUAUCUUACUUCUUCUUCUAAA	4638-4749	-34.1	>MT358637.1_93	Multibranch-No prediction	Multibranch-No prediction	No	No
187	>MT358637.1_94	CAGCGUAUAAUGGUUAUCUUACUUCUUCUUCUAAAACACCUGAAGAACAUUUUAUUGAAACCAUCUCACUUGCUG	4715-4789	-21.2	>MT358637.1_94	AUGGUUAUCUUACUUCUUCU	GAACAUUUUAUUGAAACCAUCU	Yes	Yes
189	>MT358637.1_95	ACAUUUUAUUGAAACCAUCUCACUUGCUGGUUCCUAUAAAGAUUGGUCCUAUUCUGGACAAUCUACACAACUAGGUAUAGAAUUUCUUAAGAGAGGUGAUAAAAGUGU	4761-4868	-27.2	>MT358637.1_95	ACAUUUUAUUGAAACCAUCUCAC	UAAGAGAGGUGAUAAAAGUGU	Yes	Yes
191	>MT358637.1_96	CUAGGUAUAGAAUUUCUUAAGAGAGGUGAUAAAAGUGUAUAUUACACUAGUAAUCCUACCACAUUCCACCUAG	4831-4903	-20.4	>MT358637.1_96	CUAGGUAUAGAAUUUCUUAAGA	UAAUCCUACCACAUUCCACCUAG	Yes	Yes
193	>MT358637.1_97	AUUUCUUAAGAGAGGUGAUAAAAGUGUAUAUUACACUAGUAAUCCUACCACAUUCCACCUAGAUGGUGAAGUUAUCACCUUUGACAAUCUUAAGACACUUCUUUCUUUGAGAGAAGU	4842-4958	-32.1	>MT358637.1_97	Multibranch-No prediction	Multibranch-No prediction	No	No
195	>MT358637.1_98	CUACCACAUUCCACCUAGAUGGUGAAGUUAUCACCUUUGACAAUCUUAAGACACUUCUUUCUUUGAGAGAAGUGAGGACUAUUAAGGUGUUUACAACAGUAG	4886-4987	-25.6	>MT358637.1_98	Multibranch-No prediction	Multibranch-No prediction	No	No
197	>MT358637.1_99	GACACUUCUUUCUUUGAGAGAAGUGAGGACUAUUAAGGUGUUUACAACAGUAGACAACAUUAACCUCCACACGCAAGUUGUGGACAUGUC	4935-5024	-22.7	>MT358637.1_99	Multibranch-No prediction	Multibranch-No prediction	No	No
199	>MT358637.1_100	UAGACAACAUUAACCUCCACACGCAAGUUGUGGACAUGUCAAUGACAUAUGGACAACAGUUUGGUCCAACUUAUUUGGAUGGAGCUGAUGUUACUA	4985-5080	-30.5	>MT358637.1_100	Multibranch-No prediction	Multibranch-No prediction	No	No
203	>MT358637.1_102	UGACACUCUACGUGUUGAGGCUUUUGAGUACUACCACACAACUGAUCCUAGUUUUCUGGGUAGGUACAUGUCAGCAUUAAAUCA	5136-5219	-23	>MT358637.1_102	Multibranch-No prediction	Multibranch-No prediction	No	No
207	>MT358637.1_104	UAGUUUUCUGGGUAGGUACAUGUCAGCAUUAAAUCACACUAAAAAGUGGAAAUACCCACAAGUUAAUGGUUUAACUUCUAUUAAAUGGGCAGAUAACAACUG	5184-5285	-24.6	>MT358637.1_104	UCAGCAUUAAAUCACACUAAAA	AAGUUAAUGGUUUAACUUCUAU	Yes	Yes
209	>MT358637.1_105	ACACUAAAAAGUGGAAAUACCCACAAGUUAAUGGUUUAACUUCUAUUAAAUGGGCAGAUAACAACUGUUAUCUUGCCACUGCAUUGU	5219-5305	-20.7	>MT358637.1_105	Multibranch-No prediction	Multibranch-No prediction	No	No
211	>MT358637.1_106	GUUAAUGGUUUAACUUCUAUUAAAUGGGCAGAUAACAACUGUUAUCUUGCCACUGCAUUGUUAACACUCCAACAAAUAGAGUUGAAGUUUAAU	5245-5337	-24.7	>MT358637.1_106	Multibranch-No prediction	Multibranch-No prediction	No	No
215	>MT358637.1_108	UUAAUCCACCUGCUCUACAAGAUGCUUAUUACAGAGCAAGGGCUGGUGAAGCUGCUAACUUUUGUGCACUUAUCUUAGCCUACUGUAAUAAGACAGUAGGUGAGUUAG	5333-5440	-38.5	>MT358637.1_108	UGCUUAUUACAGAGCAAGGGCUGG	UAGCCUACUGUAAUAAGACAGU	Yes	Yes
217	>MT358637.1_109	GGCUGGUGAAGCUGCUAACUUUUGUGCACUUAUCUUAGCCUACUGUAAUAAGACAGUAGGUGAGUUAGGUGAUGUUAGAGAAACAAUGAGUUACUUGUUUCAACAUGCC	5373-5481	-41.7	>MT358637.1_109	UGUGCACUUAUCUUAGCCUAC	UAGGUGAGUUAGGUGAUGUUA	Yes	Yes
219	>MT358637.1_110	GGUGAUGUUAGAGAAACAAUGAGUUACUUGUUUCAACAUGCCAAUUUAGAUUCUUGCAAAAGAGUCUUGAACGUGGUGUGUAAAACUUGUGGACAACAGCAGACAACC	5440-5547	-27.9	>MT358637.1_110	UGAGUUACUUGUUUCAACAUGCC	UGUGUAAAACUUGUGGACAAC	Yes	Yes
221	>MT358637.1_111	GGUGUGUAAAACUUGUGGACAACAGCAGACAACCCUUAAGGGUGUAGAAGCUGUUAUGUACAUGGGCACACU	5514-5585	-28.6	>MT358637.1_111	UGUAAAACUUGUGGACAACAGC	UGUUAUGUACAUGGGCACACU	Yes	Yes
223	>MT358637.1_112	GGGUGUAGAAGCUGUUAUGUACAUGGGCACACUUUCUUAUGAACAAUUUAAGAAAGGUGUUCAGAUACCUUGUACGUGUGGUAAACAAGCUACAAAAUAUCU	5553-5654	-32.4	>MT358637.1_112	UAUGUACAUGGGCACACUUUCU	AAAGGUGUUCAGAUACCUUGU	Yes	Yes
225	>MT358637.1_113	CUAGUACAACAGGAGUCACCUUUUGUUAUGAUGUCAGCACCACCUGCUCAGUAUGAACUUAAGCAUGGUACAUUUACUUGUGCUAG	5653-5738	-26.4	>MT358637.1_113	Multibranch-No prediction	Multibranch-No prediction	No	No
227	>MT358637.1_114	AGUCACCUUUUGUUAUGAUGUCAGCACCACCUGCUCAGUAUGAACUUAAGCAUGGUACAUUUACUUGUGCUAGUGAGUACACUGGUAAUUACCAGUGUGGUCACU	5666-5770	-30	>MT358637.1_114	Multibranch-No prediction	Multibranch-No prediction	No	No
229	>MT358637.1_115	GUAUGAACUUAAGCAUGGUACAUUUACUUGUGCUAGUGAGUACACUGGUAAUUACCAGUGUGGUCACUAUAAACAUAU	5703-5780	-21.2	>MT358637.1_115	Multibranch-No prediction	Multibranch-No prediction	No	No
231	>MT358637.1_116	UUGUGCUAGUGAGUACACUGGUAAUUACCAGUGUGGUCACUAUAAACAUAUAACUUCUAAAGAAACUUUGUAUUGCAUAGACGGUGCUUUACUUACAAAGUCCUCAG	5730-5836	-23	>MT358637.1_116	Multibranch-No prediction	Multibranch-No prediction	No	No
233	>MT358637.1_117	GUACACUGGUAAUUACCAGUGUGGUCACUAUAAACAUAUAACUUCUAAAGAAACUUUGUAUUGCAUAGACGGUGCUUUACUUACAAAGUCCUCAGAAUAC	5742-5841	-21.8	>MT358637.1_117	Multibranch-No prediction	Multibranch-No prediction	No	No
235	>MT358637.1_118	UAUAAACAUAUAACUUCUAAAGAAACUUUGUAUUGCAUAGACGGUGCUUUACUUACAAAGUCCUCAGAAUACAAAGGUCCUAUUACGGAUGUUUUCUA	5770-5867	-20.6	>MT358637.1_118	Multibranch-No prediction	Multibranch-No prediction	No	No
237	>MT358637.1_119	GUCCUAUUACGGAUGUUUUCUACAAAGAAAACAGUUACACAACAACCAUAAAACCAGUUACUUAUAAAUUGGAUGGUGUUGUUUGUACAGAAAUUGACCCUAAGUUGGAC	5846-5955	-23.9	>MT358637.1_119	GAUGUUUUCUACAAAGAAAAC	UUGUUUGUACAGAAAUUGACC	Yes	Yes
239	>MT358637.1_120	GGAUGUUUUCUACAAAGAAAACAGUUACACAACAACCAUAAAACCAGUUACUUAUAAAUUGGAUGGUGUUGUUUGUACAGAAAUUGACCCUAAGUUGGACAAUUAUU	5856-5962	-22.7	>MT358637.1_120	Multibranch-No prediction	Multibranch-No prediction	No	No
241	>MT358637.1_121	UUGGAUGGUGUUGUUUGUACAGAAAUUGACCCUAAGUUGGACAAUUAUUAUAAGAAAGACAAUUCUUAUUUCACAGAGCAACCAAUUGAUCUUGUACCAAACCAACCAUAUCCAA	5914-6028	-30.2	>MT358637.1_121	UUGGAUGGUGUUGUUUGUACAG	UACCAAACCAACCAUAUCCAA	Yes	Yes
243	>MT358637.1_122	UCUUGUACCAAACCAACCAUAUCCAAACGCAAGCUUCGAUAAUUUUAAGUUUGUAUGUGAUAAUAUCAAAUUUGCUGAUGAUUUAAACCAGUUAACUGGUUAUAAGA	6003-6109	-21.3	>MT358637.1_122	Multibranch-No prediction	Multibranch-No prediction	No	No
245	>MT358637.1_123	UUUAAGUUUGUAUGUGAUAAUAUCAAAUUUGCUGAUGAUUUAAACCAGUUAACUGGUUAUAAGAAACCUGCUUCAAGAGAGCUUAAAGUUACAUUUUUCCCUGACUUAAA	6046-6155	-20.3	>MT358637.1_123	UAAGUUUGUAUGUGAUAAUAUCA	UUACAUUUUUCCCUGACUUAAA	Yes	Yes
247	>MT358637.1_124	AGCUUAAAGUUACAUUUUUCCCUGACUUAAAUGGUGAUGUGGUGGCUAUUGAUUAUAAACACUACACACCCUCUUUUAAGAAAGGAGCUAAAUUGUUACAUAAACCU	6125-6231	-31	>MT358637.1_124	UGACUUAAAUGGUGAUGUGGUG	CUACACACCCUCUUUUAAGAAA	Yes	Yes
249	>MT358637.1_125	AUUGUUUGGCAUGUUAACAAUGCAACUAAUAAAGCCACGUAUAAACCAAAUACCUGGUGUAUACGUUGUCUUUGGAGCACAAAACCAGUUGAAACAUCAAAUUCGU	6232-6337	-30.8	>MT358637.1_125	CAACUAAUAAAGCCACGUAUA	UACGUUGUCUUUGGAGCACA	Yes	Yes
255	>MT358637.1_128	GUCUCUGAAGAAGUAGUGGAAAAUCCUACCAUACAGAAAGACGUUCUUGAGUGUAAUGUGAAGACUACCGAAGUUGUAGGAGAC	6403-6486	-20.1	>MT358637.1_128	UAGUGGAAAAUCCUACCAUACA	UGUAAUGUGAAGACUACCGAAG	Yes	Yes
257	>MT358637.1_129	GACGUUCUUGAGUGUAAUGUGAAGACUACCGAAGUUGUAGGAGACAUUAUACUUAAACCAGCAAAUAAUAGUUUAAAAAUUACAGAAGAGGUU	6442-6534	-24.7	>MT358637.1_129	UGAGUGUAAUGUGAAGACUAC	AGACAUUAUACUUAAACCAGCA	Yes	Yes
259	>MT358637.1_130	GGUUGGCCACACAGAUCUAAUGGCUGCUUAUGUAGACAAUUCUAGUCUUACUAUUAAGAAACCUAAUGAAUUAUCUAGAGUAUUAGGUUUGAAAACCCUUGCUACUC	6531-6637	-26.1	>MT358637.1_130	UGGCUGCUUAUGUAGACAAUUCU	AAUUAUCUAGAGUAUUAGGUUUG	Yes	Yes
265	>MT358637.1_133	CAUGGUUUAGCUGCUGUUAAUAGUGUCCCUUGGGAUACUAUAGCUAAUUAUGCUAAGCCUUUUCUUAACAAAGUUGUUAGUACAACUACUAACAUAGUUACACGGUG	6637-6743	-23	>MT358637.1_133	Multibranch-No prediction	Multibranch-No prediction	No	No
273	>MT358637.1_137	AAGUACAAAUUCUAGAAUUAAAGCAUCUAUGCCGACUACUAUAGCAAAGAAUACUGUUAAGAGUGUCGGUAAAUUUUGUCUAGAGGCUUCAUUU	6816-6909	-29.6	>MT358637.1_137	UAAAGCAUCUAUGCCGACUAC	UGUCGGUAAAUUUUGUCUAGAG	Yes	Yes
277	>MT358637.1_139	ACUAUUAAGUGUUUGCCUAGGUUCUUUAAUCUACUCAACCGCUGCUUUAGGUGUUUUAAUGUCUAAUUUAGGCAUGCCUUCUUACUGUACUGGU	6966-7059	-24.8	>MT358637.1_139	ACUAUUAAGUGUUUGCCUAGGU	UUAGGCAUGCCUUCUUACUG	Yes	Yes
279	>MT358637.1_140	UUAAGUGUUUGCCUAGGUUCUUUAAUCUACUCAACCGCUGCUUUAGGUGUUUUAAUGUCUAAUUUAGGCAUGCCUUCUUACUGUACUGGUUACAGAGAAGGCUAUUUGA	6970-7078	-25.4	>MT358637.1_140	Multibranch-No prediction	Multibranch-No prediction	No	No
281	>MT358637.1_141	AGUGUUUGCCUAGGUUCUUUAAUCUACUCAACCGCUGCUUUAGGUGUUUUAAUGUCUAAUUUAGGCAUGCCUUCUUACUGUACUGGUUACAGAGAAGGCUAUUUGAACU	6973-7081	-26.8	>MT358637.1_141	Multibranch-No prediction	Multibranch-No prediction	No	No
283	>MT358637.1_142	AGGUGUUUUAAUGUCUAAUUUAGGCAUGCCUUCUUACUGUACUGGUUACAGAGAAGGCUAUUUGAACUCUACUAAUGUCACUAUUGCAACCUACUGUACUGGUUCUAUACCU	7014-7125	-25.7	>MT358637.1_142	Multibranch-No prediction	Multibranch-No prediction	No	No
285	>MT358637.1_143	AGAGAAGGCUAUUUGAACUCUACUAAUGUCACUAUUGCAACCUACUGUACUGGUUCUAUACCUUGUAGUGUUUGUCUUAGUGGUUUAGAUUCUUUAGACACCUAUCCUUCUUU	7063-7175	-29.9	>MT358637.1_143	UCACUAUUGCAACCUACUGUACU	UAGUGUUUGUCUUAGUGGUUUA	Yes	Yes
287	>MT358637.1_144	ACCUAUCCUUCUUUAGAAACUAUACAAAUUACCAUUUCAUCUUUUAAAUGGGAUUUAACUGCUUUUGGCUUAGUUGCAGAGUGGUUUUUGGCAUAUAUUCUUUUCACUAGGU	7162-7273	-26.1	>MT358637.1_144	UAUACAAAUUACCAUUUCAUCU	UUGCAGAGUGGUUUUUGGCAU	Yes	Yes
291	>MT358637.1_146	CAUAUAUUCUUUUCACUAGGUUUUUCUAUGUACUUGGAUUGGCUGCAAUCAUGCAAUUGUUUUUCAGCUAUUUUGCAGUACAUUUUAUUAGUAAUUCUUGGCUUAUGUG	7253-7361	-27.6	>MT358637.1_146	UGUACUUGGAUUGGCUGCAAUC	UUCAGCUAUUUUGCAGUACAUUU	Yes	Yes
293	>MT358637.1_147	GUACAUUUUAUUAGUAAUUCUUGGCUUAUGUGGUUAAUAAUUAAUCUUGUACAAAUGGCCCCGAUUUCAGCUAUGGUUAGAAUGUAC	7330-7416	-24.4	>MT358637.1_147	UUAGUAAUUCUUGGCUUAUGU	UUGUACAAAUGGCCCCGAUUUCA	Yes	Yes
295	>MT358637.1_148	UGGCCCCGAUUUCAGCUAUGGUUAGAAUGUACAUCUUCUUUGCAUCAUUUUAUUAUGUAUGGAAAAGUUAUGUGCAUGUUGUAGACGGUUGUAAUUCAUCA	7385-7485	-29.8	>MT358637.1_148	UCAGCUAUGGUUAGAAUGUAC	UGCAUGUUGUAGACGGUUGUAA	Yes	Yes
297	>MT358637.1_149	UAUGGAAAAGUUAUGUGCAUGUUGUAGACGGUUGUAAUUCAUCAACUUGUAUGAUGUGUUACAAACGUAAUAGAGCAACAAGAGUCGAAUGUACAACUAUUGUUAAUG	7442-7549	-29.9	>MT358637.1_149	CAUGUUGUAGACGGUUGUAAUU	UGUUACAAACGUAAUAGAGCAA	Yes	Yes
299	>MT358637.1_150	GCAUGUUGUAGACGGUUGUAAUUCAUCAACUUGUAUGAUGUGUUACAAACGUAAUAGAGCAACAAGAGUCGAAUGUACAACUAUUGUUAAUGGUGU	7458-7553	-29.3	>MT358637.1_150	GUAAUUCAUCAACUUGUAUGA	CAACAAGAGUCGAAUGUACAA	Yes	Yes
301	>MT358637.1_151	GAAUGUACAACUAUUGUUAAUGGUGUUAGAAGGUCCUUUUAUGUCUAUGCUAAUGGAGGUAAAGGCUUUUGCAAACUACACAAUUGGAAUUGUGUUAAUUGUGAUACAUUC	7528-7638	-28.7	>MT358637.1_151	Multibranch-No prediction	Multibranch-No prediction	No	No
303	>MT358637.1_152	GGUAAAGGCUUUUGCAAACUACACAAUUGGAAUUGUGUUAAUUGUGAUACAUUCUGUGCUGGUAGUACAUUUAUUAGUGAUGAAGUUGCGAGAGACUUGUCACU	7585-7688	-25.4	>MT358637.1_152	UGCAAACUACACAAUUGGAAUU	UUCUGUGCUGGUAGUACAUUU	Yes	Yes
305	>MT358637.1_153	CUGGUAGUACAUUUAUUAGUGAUGAAGUUGCGAGAGACUUGUCACUACAGUUUAAAAGACCAAUAAAUCCUACUGACCAGUCUUCUUACAUCGUUGAUAGUGUUACAG	7643-7750	-31.9	>MT358637.1_153	CGAGAGACUUGUCACUACAGU	CCUACUGACCAGUCUUCUUACA	Yes	Yes
307	>MT358637.1_154	AGUCUUCUUACAUCGUUGAUAGUGUUACAGUGAAGAAUGGUUCCAUCCAUCUUUACUUUGAUAAAGCUGGUCAAAAGACU	7721-7800	-21.7	>MT358637.1_154	UUGAUAGUGUUACAGUGAAGA	UUUACUUUGAUAAAGCUGGUC	Yes	Yes
309	>MT358637.1_155	GUCUUCUUACAUCGUUGAUAGUGUUACAGUGAAGAAUGGUUCCAUCCAUCUUUACUUUGAUAAAGCUGGUCAAAAGACUUAUGAAAGAC	7722-7810	-23.1	>MT358637.1_155	UUGAUAGUGUUACAGUGAAGA	UUUACUUUGAUAAAGCUGGUC	Yes	Yes
311	>MT358637.1_156	UGAUAAAGCUGGUCAAAAGACUUAUGAAAGACAUUCUCUCUCUCAUUUUGUUAACUUAGACAACCUGAGAGCUAAUAACACUAAAGGUUCAUUGCCUAUUAAUGUUA	7779-7885	-31.3	>MT358637.1_156	Multibranch-No prediction	Multibranch-No prediction	No	No
315	>MT358637.1_158	AGGUUCAUUGCCUAUUAAUGUUAUAGUUUUUGAUGGUAAAUCAAAAUGUGAAGAAUCAUCUGCAAAAUCAGCGUCUGUUUACUACAGUCAGCUUAUGUGUCAACCU	7863-7968	-21.8	>MT358637.1_158	Multibranch-No prediction	Multibranch-No prediction	No	No
317	>MT358637.1_159	AAUCAUCUGCAAAAUCAGCGUCUGUUUACUACAGUCAGCUUAUGUGUCAACCUAUACUGUUACUAGAUCAGGCAUUAGUGUCUGAUGUUGGUGAUAGUGCGGAAGUU	7916-8022	-31.9	>MT358637.1_159	Multibranch-No prediction	Multibranch-No prediction	No	No
319	>MT358637.1_160	AUUAGUGUCUGAUGUUGGUGAUAGUGCGGAAGUUGCAGUUAAAAUGUUUGAUGCUUACGUUAAUACGUUUUCAUCAACUUUUAACGUACCAAUGGAAAAACUCAAAACACUAGU	7989-8102	-37.2	>MT358637.1_160	CGGAAGUUGCAGUUAAAAUGUU	UACGUUUUCAUCAACUUUUAAC	Yes	Yes
323	>MT358637.1_162	AAGAAUGUGUCCUUAGACAAUGUCUUAUCUACUUUUAUUUCAGCAGCUCGGCAAGGGUUUGUUGAUUCAGAUGUAGAAACUAAAGAUGUUGUUGAAUGUCUU	8128-8229	-30.3	>MT358637.1_162	Multibranch-No prediction	Multibranch-No prediction	No	No
327	>MT358637.1_164	AAUGUCUUAAAUUGUCACAUCAAUCUGACAUAGAAGUUACUGGCGAUAGUUGUAAUAACUAUAUGCUCACCUAUAACAAAGUUGAAAACAUGACACCCCGUGACCUU	8222-8328	-25.9	>MT358637.1_164	UGUCACAUCAAUCUGACAUAGA	UAACAAAGUUGAAAACAUGACA	Yes	Yes
329	>MT358637.1_165	CUAUAACAAAGUUGAAAACAUGACACCCCGUGACCUUGGUGCUUGUAUUGACUGUAGUGCGCGUCAUAUUAAUGCGCAGGUAGCAAAAAGUCACAACAUUGCUUUGAUAUGG	8292-8403	-30.9	>MT358637.1_165	CGUGACCUUGGUGCUUGUAUUGA	AUAUUAAUGCGCAGGUAGCAAA	Yes	Yes
331	>MT358637.1_166	UGACUGUAGUGCGCGUCAUAUUAAUGCGCAGGUAGCAAAAAGUCACAACAUUGCUUUGAUAUGGAACGUUAAAGAUUUCAUGUCA	8340-8424	-21.4	>MT358637.1_166	Multibranch-No prediction	Multibranch-No prediction	No	No
333	>MT358637.1_167	AGUGCUGCUAAAAAGAAUAACUUACCUUUUAAGUUGACAUGUGCAACUACUAGACAAGUUGUUAAUGUUGUAACAACAAAGAUAGCACUUAAGGGUGGUAAAAUU	8455-8559	-25.2	>MT358637.1_167	Multibranch-No prediction	Multibranch-No prediction	No	No
335	>MT358637.1_168	UAACUUACCUUUUAAGUUGACAUGUGCAACUACUAGACAAGUUGUUAAUGUUGUAACAACAAAGAUAGCACUUAAGGGUGGUAAAAUUGUUAAUAAUUGGUUGAAGCAGUUA	8472-8583	-30.1	>MT358637.1_168	GUUGACAUGUGCAACUACUAG	AAGGGUGGUAAAAUUGUUAAU	Yes	Yes
337	>MT358637.1_169	GGGUGGUAAAAUUGUUAAUAAUUGGUUGAAGCAGUUAAUUAAAGUUACACUUGUGUUCCUUUUUGUUGCUGCUAUUUUCUAUUUAAUAACACCU	8547-8640	-27.3	>MT358637.1_169	GGGUGGUAAAAUUGUUAAUAAU	UAUUUUCUAUUUAAUAACACCU	Yes	Yes
339	>MT358637.1_170	UGCUAUUUUCUAUUUAAUAACACCUGUUCAUGUCAUGUCUAAACAUACUGACUUUUCAAGUGAAAUCAUAGGAUACAAGGCUAUUGAUGGUGGUGUCACUCGUGACAUAGCA	8616-8727	-28.1	>MT358637.1_170	ACCUGUUCAUGUCAUGUCUAAAC	UGGUGUCACUCGUGACAUAGC	Yes	Yes
341	>MT358637.1_171	UGUCUAAACAUACUGACUUUUCAAGUGAAAUCAUAGGAUACAAGGCUAUUGAUGGUGGUGUCACUCGUGACAUAGCAUCUACAGAUA	8651-8737	-23.9	>MT358637.1_171	Multibranch-No prediction	Multibranch-No prediction	No	No
345	>MT358637.1_173	UGUCACUCGUGACAUAGCAUCUACAGAUACUUGUUUUGCUAACAAACAUGCUGAUUUUGACACAUGGUUUAGCCAGCGUGGUGGUAGUUAUACUAAUGACA	8709-8809	-26.4	>MT358637.1_173	Multibranch-No prediction	Multibranch-No prediction	No	No
347	>MT358637.1_174	CUUGUUUUGCUAACAAACAUGCUGAUUUUGACACAUGGUUUAGCCAGCGUGGUGGUAGUUAUACUAAUGACAAAGCUUGCCCAUUGAUUGCUGCAGUCAUAACAAG	8738-8843	-27.5	>MT358637.1_174	Multibranch-No prediction	Multibranch-No prediction	No	No
349	>MT358637.1_175	GAUUGCUGCAGUCAUAACAAGAGAAGUGGGUUUUGUCGUGCCUGGUUUGCCUGGCACGAUAUUACGCACAACUAAUGGUGACUUUUUGCAUUUC	8823-8916	-40.1	>MT358637.1_175	AGAGAAGUGGGUUUUGUCGUGCC	CACGAUAUUACGCACAACUAA	Yes	Yes
353	>MT358637.1_177	AGAGUUUUUAGUGCAGUUGGUAACAUCUGUUACACACCAUCAAAACUUAUAGAGUACACUGACUUUGCAACAUCAGCUUGUGUUUUGGCUGCUGAAUGUACAAUUUU	8923-9029	-23.9	>MT358637.1_177	Multibranch-No prediction	Multibranch-No prediction	No	No
355	>MT358637.1_178	CUUAUAGAGUACACUGACUUUGCAACAUCAGCUUGUGUUUUGGCUGCUGAAUGUACAAUUUUUAAAGAUGCUUCUGGUAAG	8968-9048	-22.7	>MT358637.1_178	UACACUGACUUUGCAACAUCAGC	UGAAUGUACAAUUUUUAAAGAU	Yes	Yes
357	>MT358637.1_179	GGCUGCUGAAUGUACAAUUUUUAAAGAUGCUUCUGGUAAGCCAGUACCAUAUUGUUAUGAUACCAAUGUACUAGAAGGUUCUGUUGCUUAUGAAAGUUUACGCCC	9009-9113	-28.4	>MT358637.1_179	AGAUGCUUCUGGUAAGCCAGUA	UACCAAUGUACUAGAAGGUUCUG	Yes	Yes
359	>MT358637.1_180	GUGUUUUGGCUGCUGAAUGUACAAUUUUUAAAGAUGCUUCUGGUAAGCCAGUACCAUAUUGUUAUGAUACCAAUGUACUAGAAGGUUCUGUUGCUUAUGAAAGUUUACGC	9002-9111	-30.5	>MT358637.1_180	AGAUGCUUCUGGUAAGCCAGUA	UACCAAUGUACUAGAAGGUUCUG	Yes	Yes
361	>MT358637.1_181	AAGGUUCUGUUGCUUAUGAAAGUUUACGCCCUGACACACGUUAUGUGCUCAUGGAUGGCUCUAUUAUUCAAUUUCCUAACACCUACCUU	9083-9171	-23.6	>MT358637.1_181	UUAUGAAAGUUUACGCCCUGAC	UCAUGGAUGGCUCUAUUAUUCA	Yes	Yes
363	>MT358637.1_182	AUGAAAGUUUACGCCCUGACACACGUUAUGUGCUCAUGGAUGGCUCUAUUAUUCAAUUUCCUAACACCUACCUUGAAGGUUCUGUUAGAGUGGUAACAACUUUUGAU	9098-9204	-24.3	>MT358637.1_182	Multibranch-No prediction	Multibranch-No prediction	No	No
365	>MT358637.1_183	UGUGCUCAUGGAUGGCUCUAUUAUUCAAUUUCCUAACACCUACCUUGAAGGUUCUGUUAGAGUGGUAACAACUUUUGAUUCUGAGUACUGUAGGCACG	9126-9223	-24.6	>MT358637.1_183	UGUGCUCAUGGAUGGCUCUAU	AUUCUGAGUACUGUAGGCACG	Yes	Yes
369	>MT358637.1_185	ACGGCACUUGUGAAAGAUCAGAAGCUGGUGUUUGUGUAUCUACUAGUGGUAGAUGGGUACUUAACAAUGAUUAUUACAGAUCUUUACCAGGAGUUUUCUGUGGUGUAGAUGCUGU	9221-9335	-34.1	>MT358637.1_185	Multibranch-No prediction	Multibranch-No prediction	No	No
371	>MT358637.1_186	UAGUGGUAGAUGGGUACUUAACAAUGAUUAUUACAGAUCUUUACCAGGAGUUUUCUGUGGUGUAGAUGCUGUAAAUUUACUUACUAAUAUGUUUACACCACUA	9264-9366	-32.7	>MT358637.1_186	AUGAUUAUUACAGAUCUUUACC	UGUAGAUGCUGUAAAUUUACUUA	Yes	Yes
373	>MT358637.1_187	UCUUUACCAGGAGUUUUCUGUGGUGUAGAUGCUGUAAAUUUACUUACUAAUAUGUUUACACCACUAAUUCAACCUAUUGGUGCUUUGGA	9301-9389	-27.7	>MT358637.1_187	AGGAGUUUUCUGUGGUGUAGAUG	UUACACCACUAAUUCAACCUAU	Yes	Yes
375	>MT358637.1_188	UUACCAGGAGUUUUCUGUGGUGUAGAUGCUGUAAAUUUACUUACUAAUAUGUUUACACCACUAAUUCAACCUAUUGGUGCUUUGGACAUAUCAGCAUCUAUAGUAGCUGGUGG	9304-9416	-35.8	>MT358637.1_188	UUACUAAUAUGUUUACACCACU	UGCUUUGGACAUAUCAGCAUCU	Yes	Yes
377	>MT358637.1_189	CUAAUUCAACCUAUUGGUGCUUUGGACAUAUCAGCAUCUAUAGUAGCUGGUGGUAUUGUAGCUAUCGUAGUAACAUGCCUUGCCUACUAUUUUAUGAGGUUUAGAAG	9364-9470	-21.4	>MT358637.1_189	Multibranch-No prediction	Multibranch-No prediction	No	No
379	>MT358637.1_190	AACAUGCCUUGCCUACUAUUUUAUGAGGUUUAGAAGAGCUUUUGGUGAAUACAGUCAUGUAGUUGCCUUUAAUACUUUACUAUUCCUUAUGUCAUUCACUGUACUCUGUU	9435-9544	-23.9	>MT358637.1_190	AGAAGAGCUUUUGGUGAAUAC	UAGUUGCCUUUAAUACUUUACU	Yes	Yes
381	>MT358637.1_191	AUGAGGUUUAGAAGAGCUUUUGGUGAAUACAGUCAUGUAGUUGCCUUUAAUACUUUACUAUUCCUUAUGUCAUUCACUGUACUCUGUUUAACACCAGU	9457-9554	-21	>MT358637.1_191	AGAAGAGCUUUUGGUGAAUAC	UAGUUGCCUUUAAUACUUUACU	Yes	Yes
383	>MT358637.1_192	UGUCAUUCACUGUACUCUGUUUAACACCAGUUUACUCAUUCUUACCUGGUGUUUAUUCUGUUAUUUACUUGUACUUGACA	9524-9603	-22.4	>MT358637.1_192	CACUGUACUCUGUUUAACACCA	UGGUGUUUAUUCUGUUAUUUACU	Yes	Yes
385	>MT358637.1_193	UACUAAUGAUGUUUCUUUUUUAGCACAUAUUCAGUGGAUGGUUAUGUUCACACCUUUAGUACCUUUCUGGAUAACAAUUGCUUAUAUCAUUUGUA	9612-9706	-26.2	>MT358637.1_193	UAGCACAUAUUCAGUGGAUGG	UUUCUGGAUAACAAUUGCUUAU	Yes	Yes
387	>MT358637.1_194	GCUUAUAUCAUUUGUAUUUCCACAAAGCAUUUCUAUUGGUUCUUUAGUAAUUACCUAAAGAGACGUGUAGUCUUUAAUGGUGUUUCCUUUAGUACUUUUGAAGAAGC	9691-9797	-28.3	>MT358637.1_194	Multibranch-No prediction	Multibranch-No prediction	No	No
389	>MT358637.1_195	UUUGUUAAAUAAAGAAAUGUAUCUAAAGUUGCGUAGUGAUGUGCUAUUACCUCUUACGCAAUAUAAUAGAUACUUAGCUCUUUAUAAUAAGUACAAG	9813-9909	-32.6	>MT358637.1_195	UGUAUCUAAAGUUGCGUAGUGA	UUACGCAAUAUAAUAGAUACUU	Yes	Yes
391	>MT358637.1_196	UCUUACGCAAUAUAAUAGAUACUUAGCUCUUUAUAAUAAGUACAAGUAUUUUAGUGGAGCAAUGGAUACAACUAGCUACAGAGAAGCUGCUUGUUGUCAUCUCGCAAAGG	9864-9973	-24.1	>MT358637.1_196	Multibranch-No prediction	Multibranch-No prediction	No	No
395	>MT358637.1_198	CUUCAGUAACUCAGGUUCUGAUGUUCUUUACCAACCACCACAAACCUCUAUCACCUCAGCUGUUUUGCAGAGUGGUUUUAGAAAAAUGGCAUUCCCAUCUGGUAAAGUUGAGG	9984-10096	-31.2	>MT358637.1_198	Multibranch-No prediction	Multibranch-No prediction	No	No
397	>MT358637.1_199	ACCACAAACCUCUAUCACCUCAGCUGUUUUGCAGAGUGGUUUUAGAAAAAUGGCAUUCCCAUCUGGUAAAGUUGAGGGUUGUAUGGUACAAGUAACUUGUGGU	10020-10122	-27.6	>MT358637.1_199	GCUGUUUUGCAGAGUGGUUUUAG	CAUUCCCAUCUGGUAAAGUUGA	Yes	Yes
399	>MT358637.1_200	AGGGUUGUAUGGUACAAGUAACUUGUGGUACAACUACACUUAACGGUCUUUGGCUUGAUGACGUAGUUUACUGUCCAAGACAUGUGAUCUGCACCUCUGAAGACAUGCUUAACCCU	10094-10209	-33.9	>MT358637.1_200	Multibranch-No prediction	Multibranch-No prediction	No	No
401	>MT358637.1_201	CUCUGAAGACAUGCUUAACCCUAAUUAUGAAGAUUUACUCAUUCGUAAGUCUAAUCAUAAUUUCUUGGUACAGGCUGGUAAUGUUCAACUCAGGG	10188-10282	-26.4	>MT358637.1_201	UGCUUAACCCUAAUUAUGAAGA	UAAUUUCUUGGUACAGGCUGG	Yes	Yes
403	>MT358637.1_202	AGACAUGCUUAACCCUAAUUAUGAAGAUUUACUCAUUCGUAAGUCUAAUCAUAAUUUCUUGGUACAGGCUGGUAAUGUUCAACUCAGGGUUAUUGGACAUUCU	10194-10296	-30	>MT358637.1_202	Multibranch-No prediction	Multibranch-No prediction	No	No
405	>MT358637.1_203	UAAUUUCUUGGUACAGGCUGGUAAUGUUCAACUCAGGGUUAUUGGACAUUCUAUGCAAAAUUGUGUACUUAAGCUUAAGGUUG	10245-10327	-21.2	>MT358637.1_203	UGGUACAGGCUGGUAAUGUUCA	GACAUUCUAUGCAAAAUUGUGU	Yes	Yes
407	>MT358637.1_204	UGGACAUUCUAUGCAAAAUUGUGUACUUAAGCUUAAGGUUGAUACAGCCAAUCCUAAGACACCUAAGUAUAAGUUUGUUCG	10287-10367	-20.8	>MT358637.1_204	UGGACAUUCUAUGCAAAAUUG	CACCUAAGUAUAAGUUUGUUCG	Yes	Yes
409	>MT358637.1_205	AGCCAAUCCUAAGACACCUAAGUAUAAGUUUGUUCGCAUUCAACCAGGACAGACUUUUUCAGUGUUAGCUUGUUACAAUGGUU	10332-10414	-23.4	>MT358637.1_205	ACACCUAAGUAUAAGUUUGUUC	ACAGACUUUUUCAGUGUUAGCU	Yes	Yes
411	>MT358637.1_206	UCACCAUCUGGUGUUUACCAAUGUGCUAUGAGGCCCAAUUUCACUAUUAAGGGUUCAUUCCUUAAUGGUUCAUGUGGUAGUGUUGGUUUUAACAUAGAUUAUGA	10414-10517	-35.8	>MT358637.1_206	ACCAAUGUGCUAUGAGGCCCAA	UGGUUCAUGUGGUAGUGUUGGUU	Yes	Yes
413	>MT358637.1_207	GGUUCAUUCCUUAAUGGUUCAUGUGGUAGUGUUGGUUUUAACAUAGAUUAUGACUGUGUCUCUUUUUGUUACAUGCACCAUAUGGAAUUACCAACUGGAGUUCAUGCU	10465-10572	-29.1	>MT358637.1_207	UCAUGUGGUAGUGUUGGUUUUAA	ACAUGCACCAUAUGGAAUUACC	Yes	Yes
415	>MT358637.1_208	UUAUGACUGUGUCUCUUUUUGUUACAUGCACCAUAUGGAAUUACCAACUGGAGUUCAUGCUGGCACAGACUUAG	10512-10585	-21	>MT358637.1_208	UCUCUUUUUGUUACAUGCACC	GGAGUUCAUGCUGGCACAGACU	Yes	Yes
417	>MT358637.1_209	UGUCUCUUUUUGUUACAUGCACCAUAUGGAAUUACCAACUGGAGUUCAUGCUGGCACAGACUUAGAAGGUAACUUUUAUGGACCUUUUGUUGACAGGCA			>MT358637.1_209	ACCAUAUGGAAUUACCAACUGGA	UUAGAAGGUAACUUUUAUGGAC	Yes	Yes
419	>MT358637.1_210	GGACCUUUUGUUGACAGGCAAACAGCACAAGCAGCUGGUACGGACACAACUAUUACAGUUAAUGUUUUAGCUUGGUUGUACGCUGCUGUUAUAAAUGGAGACAGGUGGUUU	10600-10710	-35.5	>MT358637.1_210	AGCUGGUACGGACACAACUAUU	UAGCUUGGUUGUACGCUGCUG	Yes	Yes
421	>MT358637.1_211	UGUUAUAAAUGGAGACAGGUGGUUUCUCAAUCGAUUUACCACAACUCUUAAUGACUUUAACCUUGUGGCUAUGAAGUACAAUUAUGAACCUCUAACACAAGACCAUGUUGACA	10686-10798	-25.5	>MT358637.1_211	Multibranch-No prediction	Multibranch-No prediction	No	No
423	>MT358637.1_212	AUGAAGUACAAUUAUGAACCUCUAACACAAGACCAUGUUGACAUACUAGGACCUCUUUCUGCUCAAACUGGAAUUGCCGUUUUAGAUAUGUGUGCUUCAU	10756-10855	-31.8	>MT358637.1_212	UAACACAAGACCAUGUUGACA	UCAAACUGGAAUUGCCGUUUUA	Yes	Yes
425	>MT358637.1_213	UUAGAUAUGUGUGCUUCAUUAAAAGAAUUACUGCAAAAUGGUAUGAAUGGACGUACCAUAUUGGGUAGUGCUUUAUUAGAAGAUGAAUUUACACCUUUUGA	10837-10937	-34.9	>MT358637.1_213	UAAAAGAAUUACUGCAAAAUGG	CAUAUUGGGUAGUGCUUUAUUA	Yes	Yes
427	>MT358637.1_214	GACAAUGCUCAGGUGUUACUUUCCAAAGUGCAGUGAAAAGAACAAUCAAGGGUACACACCACUGGUUGUUACUCACAAUUUUGACUUCACUUUUAGUUUUAGUC	10946-11049	-32.8	>MT358637.1_214	UACUUUCCAAAGUGCAGUGAAA	UUACUCACAAUUUUGACUUCA	Yes	Yes
429	>MT358637.1_215	GUGCAGUGAAAAGAACAAUCAAGGGUACACACCACUGGUUGUUACUCACAAUUUUGACUUCACUUUUAGUUUUAGUCCAGAGUACUCAAUGGUCUUUGUUCUUUUUUUUGUAU	10973-11085	-36.3	>MT358637.1_215	UGGUUGUUACUCACAAUUUUGA	UAGUCCAGAGUACUCAAUGGUC	Yes	Yes
433	>MT358637.1_217	GCUAUGUCUGCUUUUGCAAUGAUGUUUGUCAAACAUAAGCAUGCAUUUCUCUGUUUGUUUUUGUUACCUUCUCUUGCCACUGUAGCUUAUUUUAAUAUGGU	11122-11222	-26.3	>MT358637.1_217	UUUGCAAUGAUGUUUGUCAAA	UUACCUUCUCUUGCCACUGUAG	Yes	Yes
435	>MT358637.1_218	UGUUUGUCAAACAUAAGCAUGCAUUUCUCUGUUUGUUUUUGUUACCUUCUCUUGCCACUGUAGCUUAUUUUAAUAUGGUCUAUAUGCCUGCUAGUUGGGUGAUGCG	11144-11249	-24.1	>MT358637.1_218	AAGCAUGCAUUUCUCUGUUUGU	UAAUAUGGUCUAUAUGCCUGCU	Yes	Yes
437	>MT358637.1_219	CUGCUAGUUGGGUGAUGCGUAUUAUGACAUGGUUGGAUAUGGUUGAUACUAGUUUGUCUGGUUUUAAGCUAAAAGACUGUGUUAUGUAUGCAUCAGCUGUAG	11231-11332	-37.5	>MT358637.1_219	UGCGUAUUAUGACAUGGUUGGA	UAAAAGACUGUGUUAUGUAUGC	Yes	Yes
441	>MT358637.1_221	GUCUGGUUUUAAGCUAAAAGACUGUGUUAUGUAUGCAUCAGCUGUAGUGUUACUAAUCCUUAUGACAGCAAGAACUGUGUAUGAUGAUGGUGCUAGGAGAGUGUGGAC	11286-11393	-26.9	>MT358637.1_221	UUAUGUAUGCAUCAGCUGUAG	UGACAGCAAGAACUGUGUAUGA	Yes	Yes
445	>MT358637.1_223	ACACUUAUGAAUGUCUUGACACUCGUUUAUAAAGUUUAUUAUGGUAAUGCUUUAGAUCAAGCCAUUUCCAUGUGGGCUCUUAUAAUCUCUGUUACUUCUAACUACUCAGGUGU	11392-11504	-27.1	>MT358637.1_223	UAUAAAGUUUAUUAUGGUAAUG	UUUCCAUGUGGGCUCUUAUAAU	Yes	Yes
447	>MT358637.1_224	UCAAGCCAUUUCCAUGUGGGCUCUUAUAAUCUCUGUUACUUCUAACUACUCAGGUGUAGUUACAACUGUCAUGUUUUUGGCCAGAGGUAUUGUUUUUAUGUGUGUUGA	11448-11555	-27	>MT358637.1_224	AUCUCUGUUACUUCUAACUACUC	UCAUGUUUUUGGCCAGAGGUAU	Yes	Yes
449	>MT358637.1_225	GCUCUUAUAAUCUCUGUUACUUCUAACUACUCAGGUGUAGUUACAACUGUCAUGUUUUUGGCCAGAGGUAUUGUUUUUAUGUGUGUUGAGU	11467-11557	-22.8	>MT358637.1_225	CUCUGUUACUUCUAACUACUC	UCAUGUUUUUGGCCAGAGGUAU	Yes	Yes
451	>MT358637.1_226	UUAUGUGUGUUGAGUAUUGCCCUAUUUUCUUCAUAACUGGUAAUACACUUCAGUGUAUAAUGCUAGUUUAUUGUUUCUUAGGCUAUUUUUGUACUUGUUACUUUGG	11543-11648	-22.6	>MT358637.1_226	CUAUUUUCUUCAUAACUGGUAA	UAAUGCUAGUUUAUUGUUUCUU	Yes	Yes
453	>MT358637.1_227	ACACUUCAGUGUAUAAUGCUAGUUUAUUGUUUCUUAGGCUAUUUUUGUACUUGUUACUUUGGCCUCUUUUGUUUACUCAACCGCUACUUUAGACUGACUCUUGGUGU	11587-11693	-25.1	>MT358637.1_227	AGUGUAUAAUGCUAGUUUAUUG	UCAACCGCUACUUUAGACUGAC	Yes	Yes
455	>MT358637.1_228	UAUAUGAAUUCACAGGGACUACUCCCACCCAAGAAUAGCAUAGAUGCCUUCAAACUCAACAUUAAAUUGUUGGGUGUUGGUGGCAAACCUUGUAUCAAAGUA	11728-11829	-28.3	>MT358637.1_228	Multibranch-No prediction	Multibranch-No prediction	No	No
457	>MT358637.1_229	AUUCACAGGGACUACUCCCACCCAAGAAUAGCAUAGAUGCCUUCAAACUCAACAUUAAAUUGUUGGGUGUUGGUGGCAAACCUUGUAUCAAAGUAGCCACUGUACAGU	11735-11842	-34	>MT358637.1_229	AGCAUAGAUGCCUUCAAACUCA	GUGUUGGUGGCAAACCUUGUAU	Yes	Yes
459	>MT358637.1_230	UGGUGGCAAACCUUGUAUCAAAGUAGCCACUGUACAGUCUAAAAUGUCAGAUGUAAAGUGCACAUCAGUAGUCUUACUCUCAGUUUUGCAACAACUCAGAGUAGAAUCAUCA	11805-11916	-25.4	>MT358637.1_230	Multibranch-No prediction	Multibranch-No prediction	No	No
463	>MT358637.1_232	AGAGUAGAAUCAUCAUCUAAAUUGUGGGCUCAAUGUGUCCAGUUACACAAUGACAUUCUCUUAGCUAAAGAUACUACUGAAGCCUUUGAAAAAAUGGUUUCACUACUUU	11902-12010	-29.8	>MT358637.1_232	UGGGCUCAAUGUGUCCAGUUACA	UUAGCUAAAGAUACUACUGAAG	Yes	Yes
465	>MT358637.1_233	GUCCAGUUACACAAUGACAUUCUCUUAGCUAAAGAUACUACUGAAGCCUUUGAAAAAAUGGUUUCACUACUUUCUGUUUUGCUUUCCAUGCAGGGUGCUGUAGACAU	11938-12044	-28.4	>MT358637.1_233	AGCUAAAGAUACUACUGAAGCC	UUUCACUACUUUCUGUUUUGCU	Yes	Yes
469	>MT358637.1_235	GCUUUCCAUGCAGGGUGCUGUAGACAUAAACAAGCUUUGUGAAGAAAUGCUGGACAACAGGGCAACCUUACAAGCUAUAGCCUCAGAGUUUAGU	12018-12111	-20.4	>MT358637.1_235	UGUAGACAUAAACAAGCUUUGU	CAGGGCAACCUUACAAGCUAUAGC	Yes	Yes
471	>MT358637.1_236	AAGCUAUAGCCUCAGAGUUUAGUUCCCUUCCAUCAUAUGCAGCUUUUGCUACUGCUCAAGAAGCUUAUGAGCAGGCUGUUGCUAAUGGUGAUUCUGAAGUUGUUCUU	12089-12195	-36	>MT358637.1_236	AUAUGCAGCUUUUGCUACUGCUC	AGGCUGUUGCUAAUGGUGAUUC	Yes	Yes
473	>MT358637.1_237	AGUCUUUGAAUGUGGCUAAAUCUGAAUUUGACCGUGAUGCAGCCAUGCAACGUAAGUUGGAAAAGAUGGCUGAUCAAGCUAUGACCCAAAUGUAUAAACAGGCU	12209-12312	-27	>MT358637.1_237	AAUUUGACCGUGAUGCAGCCAUG	UGGCUGAUCAAGCUAUGACCCA	Yes	Yes
475	>MT358637.1_238	UGUAUAAACAGGCUAGAUCUGAGGACAAGAGGGCAAAAGUUACUAGUGCUAUGCAGACAAUGCUUUUCACUAUGCUUAGAAAGUUGGAUAAUGAUGCA	12299-12396	-26.3	>MT358637.1_238	UGAGGACAAGAGGGCAAAAGUUA	UGCUUUUCACUAUGCUUAGAAA	Yes	Yes
477	>MT358637.1_239	UGCUUAGAAAGUUGGAUAAUGAUGCACUCAACAACAUUAUCAACAAUGCAAGAGAUGGUUGUGUUCCCUUGAACAUAAUACCUCUUACAACAGCA	12371-12465	-22.9	>MT358637.1_239	Multibranch-No prediction	Multibranch-No prediction	No	No
483	>MT358637.1_242	UCUUACAACAGCAGCCAAACUAAUGGUUGUCAUACCAGACUAUAACACAUAUAAAAAUACGUGUGAUGGUACAACAUUUACUUAUGCAUCAGCAUUGUGGGA	12453-12554	-25.6	>MT358637.1_242	Multibranch-No prediction	Multibranch-No prediction	No	No
485	>MT358637.1_243	CAUAUAAAAAUACGUGUGAUGGUACAACAUUUACUUAUGCAUCAGCAUUGUGGGAAAUCCAACAGGUUGUAGAUGCAGAUAGUAAAAUUGUUCAACUUAGUGAAAUUAGUAUG	12500-12612	-33.9	>MT358637.1_243	ACAUUUACUUAUGCAUCAGCA	UAGAUGCAGAUAGUAAAAUUGU	Yes	Yes
489	>MT358637.1_245	AGCAUGGCCUCUUAUUGUAACAGCUUUAAGGGCCAAUUCUGCUGUCAAAUUACAGAAUAAUGAGCUUAGUCCUGUUGCACUACGACAGAUGUCUUGUGCU	12630-12729	-32.4	>MT358637.1_245	AACAGCUUUAAGGGCCAAUUCU	AAUAAUGAGCUUAGUCCUGUUGC	Yes	Yes
491	>MT358637.1_246	UAGUCCUGUUGCACUACGACAGAUGUCUUGUGCUGCCGGUACUACACAAACUGCUUGCACUGAUGACAAUGCGUUAGCUUACUA	12696-12779	-23.5	>MT358637.1_246	Multibranch-No prediction	Multibranch-No prediction	No	No
493	>MT358637.1_247	UGCCGGUACUACACAAACUGCUUGCACUGAUGACAAUGCGUUAGCUUACUACAACACAACAAAGGGAGGUAGGUUUGUACUUGCA	12729-12813	-22.5	>MT358637.1_247	UACUACACAAACUGCUUGCACUG	AGGGAGGUAGGUUUGUACUUGC	Yes	Yes
495	>MT358637.1_248	CUACACAAACUGCUUGCACUGAUGACAAUGCGUUAGCUUACUACAACACAACAAAGGGAGGUAGGUUUGUACUUGCACUGUUAUCCGAUUUACAGGAUUUGAAAUGG	12737-12843	-29.2	>MT358637.1_248	AUGACAAUGCGUUAGCUUACU	UAGGUUUGUACUUGCACUGUU	Yes	Yes
497	>MT358637.1_249	ACUUGCACUGUUAUCCGAUUUACAGGAUUUGAAAUGGGCUAGAUUCCCUAAGAGUGAUGGAACUGGUACUAUCUAUACAGAACUGGAACCACCUUGUAGGU	12807-12907	-29.4	>MT358637.1_249	Multibranch-No prediction	Multibranch-No prediction	No	No
499	>MT358637.1_250	AGACACACCUAAAGGUCCUAAAGUGAAGUAUUUAUACUUUAUUAAAGGAUUAAACAACCUAAAUAGAGGUAUGGUACUUGGUAGUUUAGCUGCCACAGUACGUCU	12915-13019	-30.7	>MT358637.1_250	Multibranch-No prediction	Multibranch-No prediction	No	No
501	>MT358637.1_251	UACUUUAUUAAAGGAUUAAACAACCUAAAUAGAGGUAUGGUACUUGGUAGUUUAGCUGCCACAGUACGUCUACAAGCUGGUAAUGCAACAGAAGUG	12949-13044	-26.1	>MT358637.1_251	Multibranch-No prediction	Multibranch-No prediction	No	No
503	>MT358637.1_252	GUUUAGCUGCCACAGUACGUCUACAAGCUGGUAAUGCAACAGAAGUGCCUGCCAAUUCAACUGUAUUAUCUUUCUGUGCUUUUGCUGUAGAUGCUGCUAAAGCUUAC	12998-13104	-33.5	>MT358637.1_252	UGGUAAUGCAACAGAAGUGCC	UAUUAUCUUUCUGUGCUUUUGC	Yes	Yes
505	>MT358637.1_253	UUGCUGUAGAUGCUGCUAAAGCUUACAAAGAUUAUCUAGCUAGUGGGGGACAACCAAUCACUAAUUGUGUUAAGAUGUUGUGUACACACACUGGUACUGGUCAGGCAA	13079-13186	-30.4	>MT358637.1_253	UACAAAGAUUAUCUAGCUAGUG	UAAGAUGUUGUGUACACACACU	Yes	Yes
507	>MT358637.1_254	GCUGCUAAAGCUUACAAAGAUUAUCUAGCUAGUGGGGGACAACCAAUCACUAAUUGUGUUAAGAUGUUGUGUACACACACUGGUACUGGUCAGGCAAUAACAGU	13090-13193	-29.3	>MT358637.1_254	UAGCUAGUGGGGGACAACCAA	UGUGUACACACACUGGUACUGG	Yes	Yes
509	>MT358637.1_255	UGUGUACACACACUGGUACUGGUCAGGCAAUAACAGUUACACCGGAAGCCAAUAUGGAUCAAGAAUCCUUUGGUGGUGCAUCGUGUUGUCUGUACUGCCGUUGCCACAUA	13157-13266	-36.7	>MT358637.1_255	Multibranch-No prediction	Multibranch-No prediction	No	No
511	>MT358637.1_256	UGGUACUGGUCAGGCAAUAACAGUUACACCGGAAGCCAAUAUGGAUCAAGAAUCCUUUGGUGGUGCAUCGUGUUGUCUGUACUGCCGUUGCCACAUAGAUCAUCCA	13170-13275	-34.4	>MT358637.1_256	AGGCAAUAACAGUUACACCGG	UGGUGCAUCGUGUUGUCUGUAC	Yes	Yes
513	>MT358637.1_257	GCAUCGUGUUGUCUGUACUGCCGUUGCCACAUAGAUCAUCCAAAUCCUAAAGGAUUUUGUGACUUAAAAGGUAAGUAUGUACAAAUACCUACAACUUGUGC	13234-13334	-33.3	>MT358637.1_257	CCGUUGCCACAUAGAUCAUCCA	UGUGACUUAAAAGGUAAGUAU	Yes	Yes
519	>MT358637.1_260	UACAACUUGUGCUAAUGACCCUGUGGGUUUUACACUUAAAAACACAGUCUGUACCGUCUGCGGUAUGUGGAAAGGUUAUGGCUGUAGUUGUG	13323-13414	-24.9	>MT358637.1_260	Multibranch-No prediction	Multibranch-No prediction	No	No
521	>MT358637.1_261	GGCUGUAGUUGUGAUCAACUCCGCGAACCCAUGCUUCAGUCAGCUGAUGCACAAUCGUUUUUAAACGGGUUUGCGGUGUAAGUGCAGCC	13402-13490	-35.7	>MT358637.1_261	AACUCCGCGAACCCAUGCUUCA	UAAACGGGUUUGCGGUGUAAG	Yes	Yes
523	>MT358637.1_262	GUCAGCUGAUGCACAAUCGUUUUUAAACGGGUUUGCGGUGUAAGUGCAGCCCGUCUUACACCGUGCGGCACAGGCACUAGUACUGAUGUCGUAUACAGGGCUUUUGAC	13440-13547	-29.2	>MT358637.1_262	Multibranch-No prediction	Multibranch-No prediction	No	No
525	>MT358637.1_263	AUCGUUUUUAAACGGGUUUGCGGUGUAAGUGCAGCCCGUCUUACACCGUGCGGCACAGGCACUAGUACUGAUGUCGUAUACAGGGCUUUUGACAUCUACAAUGAU	13455-13559	-26.9	>MT358637.1_263	Multibranch-No prediction	Multibranch-No prediction	No	No
531	>MT358637.1_266	AAAGUAGCUGGUUUUGCUAAAUUCCUAAAAACUAAUUGUUGUCGCUUCCAAGAAAAGGACGAAGAUGACAAUUUAAUUGAUUCUUACUUUGUAGUUAAGAGACACACUUU	13560-13669	-22.3	>MT358637.1_266	Multibranch-No prediction	Multibranch-No prediction	No	No
533	>MT358637.1_267	GGACGAAGAUGACAAUUUAAUUGAUUCUUACUUUGUAGUUAAGAGACACACUUUCUCUAACUACCAACAUGAAGAAACAAUUUAUAAUUUACUUAAGGAUUGUCC	13616-13720	-30.7	>MT358637.1_267	UAAUUGAUUCUUACUUUGUAGUUA	UAACUACCAACAUGAAGAAAC	Yes	Yes
535	>MT358637.1_268	UACCAACAUGAAGAAACAAUUUAUAAUUUACUUAAGGAUUGUCCAGCUGUUGCUAAACAUGACUUCUUUAAGUUUAGAAUAGACGGUGACAUGGUA	13677-13772	-27.5	>MT358637.1_268	CAAUUUAUAAUUUACUUAAGGA	CUUCUUUAAGUUUAGAAUAGA	Yes	Yes
537	>MT358637.1_269	UGACAUGGUACCACAUAUAUCACGUCAACGUCUUACUAAAUACACAAUGGCAGACCUCGUCUAUGCUUUAAGGCAUUUUGAUGAAGGUAAUUGUGACACAUUA	13763-13865	-26.9	>MT358637.1_269	Multibranch-No prediction	Multibranch-No prediction	No	No
541	>MT358637.1_271	UGGUAUGAUUUUGUAGAAAACCCAGAUAUAUUACGCGUAUACGCCAACUUAGGUGAACGUGUACGCCAAGCUUUGUUAAAAACAGUACAAUUCUGUGAUGCCA	13923-14025	-26.3	>MT358637.1_271	CAGAUAUAUUACGCGUAUACG	UGUACGCCAAGCUUUGUUAAAA	Yes	Yes
543	>MT358637.1_272	GUACGCCAAGCUUUGUUAAAAACAGUACAAUUCUGUGAUGCCAUGCGAAAUGCUGGUAUUGUUGGUGUACUGACAUUAGAUAAUCAAGAUCUCAAUGGUAAC	13983-14084	-25.2	>MT358637.1_272	Multibranch-No prediction	Multibranch-No prediction	No	No
545	>MT358637.1_273	GCGAAAUGCUGGUAUUGUUGGUGUACUGACAUUAGAUAAUCAAGAUCUCAAUGGUAACUGGUAUGAUUUCGGUGAUUUCAUACAAACCACGCCAGGUAGUGGAGU	14027-14131	-26.6	>MT358637.1_273	Multibranch-No prediction	Multibranch-No prediction	No	No
547	>MT358637.1_274	GCUGGUAUUGUUGGUGUACUGACAUUAGAUAAUCAAGAUCUCAAUGGUAACUGGUAUGAUUUCGGUGAUUUCAUACAAACCACGCCAGGUAGUGGAGU	14034-14131	-25.2	>MT358637.1_274	UGACAUUAGAUAAUCAAGAUC	UAUGAUUUCGGUGAUUUCAUAC	Yes	Yes
551	>MT358637.1_276	AGGUAGUGGAGUUCCUGUUGUAGAUUCUUAUUAUUCAUUGUUAAUGCCUAUAUUAACCUUGACCAGGGCUUUAACUGCAGAGUCACAUGUUGACACUGACU	14120-14220	-23.5	>MT358637.1_276	Multibranch-No prediction	Multibranch-No prediction	No	No
553	>MT358637.1_277	AGUGGAGUUCCUGUUGUAGAUUCUUAUUAUUCAUUGUUAAUGCCUAUAUUAACCUUGACCAGGGCUUUAACUGCAGAGUCACAUGUUGACACUGACU	14124-14220	-23.3	>MT358637.1_277	Multibranch-No prediction	Multibranch-No prediction	No	No
555	>MT358637.1_278	UUAACCUUGACCAGGGCUUUAACUGCAGAGUCACAUGUUGACACUGACUUAACAAAGCCUUACAUUAAGUGGGAUUUGUUAAAAUAUGACUUCACGGAAGAGAGGUUAA	14172-14280	-30.4	>MT358637.1_278	UGCAGAGUCACAUGUUGACACU	UGUUAAAAUAUGACUUCACGGA	Yes	Yes
557	>MT358637.1_279	GACCAGGGCUUUAACUGCAGAGUCACAUGUUGACACUGACUUAACAAAGCCUUACAUUAAGUGGGAUUUGUUAAAAUAUGACUUCACGGAAGAGAGGUUAAAACUC	14180-14285	-28.6	>MT358637.1_279	UGCAGAGUCACAUGUUGACACU	UGUUAAAAUAUGACUUCACGGA	Yes	Yes
561	>MT358637.1_281	CUGCAUUGUGCAAACUUUAAUGUUUUAUUCUCUACAGUGUUCCCACUUACAAGUUUUGGACCACUAGUGAGAAAAAUAUUUGUUGAUGGUGUUCCAUUUGUAG	14361-14463	-29.2	>MT358637.1_281	UGUUUUAUUCUCUACAGUGUUC	ACCACUAGUGAGAAAAAUAUU	Yes	Yes
563	>MT358637.1_282	ACAGAUGCAUUCUGCAUUGUGCAAACUUUAAUGUUUUAUUCUCUACAGUGUUCCCACUUACAAGUUUUGGACCACUAGUGAGAAAAAUAUUUGUUGAUGGUGUUCCAUUUGU	14350-14461	-31.8	>MT358637.1_282	ACAGAUGCAUUCUGCAUUGUGC	UUUGUUGAUGGUGUUCCAUUUGU	Yes	Yes
565	>MT358637.1_283	GUGUUCCCACUUACAAGUUUUGGACCACUAGUGAGAAAAAUAUUUGUUGAUGGUGUUCCAUUUGUAGUUUCAACUGGAUACCACUUCAGAGAGCUAGGUGUUGUACAU	14397-14504	-29.8	>MT358637.1_283	Multibranch-No prediction	Multibranch-No prediction	No	No
567	>MT358637.1_284	CUAGUGAGAAAAAUAUUUGUUGAUGGUGUUCCAUUUGUAGUUUCAACUGGAUACCACUUCAGAGAGCUAGGUGUUGUACAUAAUCAGGAUGUAAACUUACAUAG	14424-14527	-32.7	>MT358637.1_284	UGGUGUUCCAUUUGUAGUUUCA	AGAGCUAGGUGUUGUACAUAAUC	Yes	Yes
569	>MT358637.1_285	CAUUUGUAGUUUCAACUGGAUACCACUUCAGAGAGCUAGGUGUUGUACAUAAUCAGGAUGUAAACUUACAUAGCUCUAGACUUAGUUUUAAGGAAUUACUUGUG	14455-14558	-33.4	>MT358637.1_285	UCAGAGAGCUAGGUGUUGUA	UAAACUUACAUAGCUCUAGACU	Yes	Yes
571	>MT358637.1_286	UCAGAGAGCUAGGUGUUGUACAUAAUCAGGAUGUAAACUUACAUAGCUCUAGACUUAGUUUUAAGGAAUUACUUGUGUAUGCUGCUGACCCUGCUAUGCACGCUGCUUCUGG	14482-14593	-33.4	>MT358637.1_286	UCAGGAUGUAAACUUACAUAGC	UUACUUGUGUAUGCUGCUGACC	Yes	Yes
573	>MT358637.1_287	UUACUUGUGUAUGCUGCUGACCCUGCUAUGCACGCUGCUUCUGGUAAUCUAUUACUAGAUAAACGCACUACGUGCUUUUCAGUAGCUGCACUUACUAA	14550-14647	-39.8	>MT358637.1_287	ACCCUGCUAUGCACGCUGCUUCU	AUAAACGCACUACGUGCUUUU	Yes	Yes
575	>MT358637.1_288	UAGAUAAACGCACUACGUGCUUUUCAGUAGCUGCACUUACUAACAAUGUUGCUUUUCAAACUGUCAAACCCGGUAAUUUUAACAAAGACUUCUAUGACUUUGCUGUGUCUA	14605-14715	-22.1	>MT358637.1_288	Multibranch-No prediction	Multibranch-No prediction	No	No
577	>MT358637.1_289	CUGUCAAACCCGGUAAUUUUAACAAAGACUUCUAUGACUUUGCUGUGUCUAAGGGUUUCUUUAAGGAAGGAAGUUCUGUUGAAUUAAAACACUUCUUCUUUGCUCAG	14665-14771	-25	>MT358637.1_289	Multibranch-No prediction	Multibranch-No prediction	No	No
579	>MT358637.1_290	GGGUUUCUUUAAGGAAGGAAGUUCUGUUGAAUUAAAACACUUCUUCUUUGCUCAGGAUGGUAAUGCUGCUAUCAGCGAUUAUGACUACUAUCGUUAUAAUCU	14717-14818	-25.3	>MT358637.1_290	Multibranch-No prediction	Multibranch-No prediction	No	No
581	>MT358637.1_291	AUGACUACUAUCGUUAUAAUCUACCAACAAUGUGUGAUAUCAGACAACUACUAUUUGUAGUUGAAGUUGUUGAUAAGUACUUUGAUUGUUACGAUGGUGGCUGU	14797-14900	-33.2	>MT358637.1_291	GUUAUAAUCUACCAACAAUGUGU	UAAGUACUUUGAUUGUUACGA	Yes	Yes
583	>MT358637.1_292	AGUUGAAGUUGUUGAUAAGUACUUUGAUUGUUACGAUGGUGGCUGUAUUAAUGCUAACCAAGUCAUCGUCAACAACCUAGACAAAUCAGCUGGUUUUCCAUU	14855-14956	-30.1	>MT358637.1_292	AGUACUUUGAUUGUUACGAUGG	AAGUCAUCGUCAACAACCUAG	Yes	Yes
587	>MT358637.1_294	UGAGUUAUGAGGAUCAAGAUGCACUUUUCGCAUAUACAAAACGUAAUGUCAUCCCUACUAUAACUCAAAUGAAUCUUAAGUAUGCCAUUAGUGCAAAGAAUAGAGCUCG	14995-15103	-29.1	>MT358637.1_294	Multibranch-No prediction	Multibranch-No prediction	No	No
589	>MT358637.1_295	GCUCGCACCGUAGCUGGUGUCUCUAUCUGUAGUACUAUGACCAAUAGACAGUUUCAUCAAAAAUUAUUGAAAUCAAUAGCCGCCACUAGAGGAGCUACUGUAGU	15099-15202	-26.9	>MT358637.1_295	UGUAGUACUAUGACCAAUAGAC	UGAAAUCAAUAGCCGCCACUAG	Yes	Yes
591	>MT358637.1_296	CAUCAAAAAUUAUUGAAAUCAAUAGCCGCCACUAGAGGAGCUACUGUAGUAAUUGGAACAAGCAAAUUCUAUGGUGGUUGGCACAACAUGUUAAAAACUGUUUAUAGUGAUG	15153-15264	-31.3	>MT358637.1_296	Multibranch-No prediction	Multibranch-No prediction	No	No
595	>MT358637.1_298	AGUGAUGUAGAAAACCCUCACCUUAUGGGUUGGGAUUAUCCUAAAUGUGAUAGAGCCAUGCCUAACAUGCUUAGAAUUAUGGCCUCACU	15258-15346	-24.4	>MT358637.1_298	Multibranch-No prediction	Multibranch-No prediction	No	No
599	>MT358637.1_300	UAUGGCCUCACUUGUUCUUGCUCGCAAACAUACAACGUGUUGUAGCUUGUCACACCGUUUCUAUAGAUUAGCUAAUGAGUGUGCUCAAGUAUUGAGUGAAAUGGUCAUG	15335-15443	-32.2	>MT358637.1_300	Multibranch-No prediction	Multibranch-No prediction	No	No
601	>MT358637.1_301	AACGUGUUGUAGCUUGUCACACCGUUUCUAUAGAUUAGCUAAUGAGUGUGCUCAAGUAUUGAGUGAAAUGGUCAUGUGUGGCGGUUCACUAUAUGUU	15368-15464	-29	>MT358637.1_301	CACCGUUUCUAUAGAUUAGCUA	AAGUAUUGAGUGAAAUGGUCAU	Yes	Yes
607	>MT358637.1_304	UCAUCAGGAGAUGCCACAACUGCUUAUGCUAAUAGUGUUUUUAACAUUUGUCAAGCUGUCACGGCCAAUGUUAAUGCACUUUUAUCUACUGAUGG	15480-15574	-25.3	>MT358637.1_304	UAAUAGUGUUUUUAACAUUUG	CCAAUGUUAAUGCACUUUUAUC	Yes	Yes
609	>MT358637.1_305	CAGACUUUAUGAGUGUCUCUAUAGAAAUAGAGAUGUUGACACAGACUUUGUGAAUGAGUUUUACGCAUAUUUGCGUAAACAUUUCUCAAUGAUGAUACUCUCUG	15614-15717	-33.6	>MT358637.1_305	AGAGAUGUUGACACAGACUUU	CAUAUUUGCGUAAACAUUUCU	Yes	Yes
611	>MT358637.1_306	GCGUAAACAUUUCUCAAUGAUGAUACUCUCUGACGAUGCUGUUGUGUGUUUCAAUAGCACUUAUGCAUCUCAAGGUCUAGUGGCUAGCAUAAAGAACUUUAAGU	15686-15789	-27.3	>MT358637.1_306	AUACUCUCUGACGAUGCUGUUG	UAUGCAUCUCAAGGUCUAGUGG	Yes	Yes
613	>MT358637.1_307	AGGUCUAGUGGCUAGCAUAAAGAACUUUAAGUCAGUUCUUUAUUAUCAAAACAAUGUUUUUAUGUCUGAAGCAAAAUGUUGGACUGAGACUGACCUUACUAAAGGACCU	15758-15866	-27.8	>MT358637.1_307	UCAGUUCUUUAUUAUCAAAACA	UUGGACUGAGACUGACCUUACU	Yes	Yes
615	>MT358637.1_308	CAUAAAGAACUUUAAGUCAGUUCUUUAUUAUCAAAACAAUGUUUUUAUGUCUGAAGCAAAAUGUUGGACUGAGACUGACCUUACUAAAGGACCUCAUG	15773-15870	-25.2	>MT358637.1_308	Multibranch-No prediction	Multibranch-No prediction	No	No
617	>MT358637.1_309	UUAUUAUCAAAACAAUGUUUUUAUGUCUGAAGCAAAAUGUUGGACUGAGACUGACCUUACUAAAGGACCUCAUGAAUUUUGCUCUCAACAUACAAUGCUAGUUAAACAGGGUGAUGA	15797-15913	-32	>MT358637.1_309	UUAUGUCUGAAGCAAAAUGUU	CCUCAUGAAUUUUGCUCUCAAC	Yes	Yes
619	>MT358637.1_310	UUUUGCUCUCAACAUACAAUGCUAGUUAAACAGGGUGAUGAUUAUGUGUACCUUCCUUACCCAGAUCCAUCAAGAAUCCUAGGGGCCGGCUGUUUUGUAGAUGAUAUCGUAAAA	15873-15986	-28	>MT358637.1_310	UACAAUGCUAGUUAAACAGGGU	CUAGGGGCCGGCUGUUUUGUAG	Yes	Yes
621	>MT358637.1_311	ACCCAGAUCCAUCAAGAAUCCUAGGGGCCGGCUGUUUUGUAGAUGAUAUCGUAAAAACAGAUGGUACACUUAUGAUUGAACGGU	15931-16014	-22.3	>MT358637.1_311	AAGAAUCCUAGGGGCCGGCUGUUU	AAACAGAUGGUACACUUAUGA	Yes	Yes
623	>MT358637.1_312	GGGCCGGCUGUUUUGUAGAUGAUAUCGUAAAAACAGAUGGUACACUUAUGAUUGAACGGUUCGUGUCUUUAGCUAUAGAUGCUUACCC	15955-16042	-23.7	>MT358637.1_312	Multibranch-No prediction	Multibranch-No prediction	No	No
625	>MT358637.1_313	AUCAGGAGUAUGCUGAUGUCUUUCAUUUGUACUUACAAUACAUAAGAAAGCUACAUGAUGAGUUAACAGGACACAUGUUAGACAUGUAUUCUGUUAUGCUUACUAAUGAU	16060-16169	-30	>MT358637.1_313	Multibranch-No prediction	Multibranch-No prediction	No	No
627	>MT358637.1_314	AGGACACAUGUUAGACAUGUAUUCUGUUAUGCUUACUAAUGAUAACACUUCAAGGUAUUGGGAACCUGAGUUUUAUGAGGCUAUGUACACACCGCAUACAGUCUU	16127-16231	-21.2	>MT358637.1_314	Multibranch-No prediction	Multibranch-No prediction	No	No
629	>MT358637.1_315	UGUUAGACAUGUAUUCUGUUAUGCUUACUAAUGAUAACACUUCAAGGUAUUGGGAACCUGAGUUUUAUGAGGCUAUGUACACACCGCAUACAGUCUUACA	16135-16234	-22.5	>MT358637.1_315	AUGCUUACUAAUGAUAACACUUCA	UGAGUUUUAUGAGGCUAUGUAC	Yes	Yes
631	>MT358637.1_316	GAGUUUUAUGAGGCUAUGUACACACCGCAUACAGUCUUACAGGCUGUUGGGGCUUGUGUUCUUUGCAAUUCACAGACUU	16194-16272	-25.9	>MT358637.1_316	AGGCUAUGUACACACCGCAUA	UGGGGCUUGUGUUCUUUGCAAUU	Yes	Yes
633	>MT358637.1_317	UAUGAGGCUAUGUACACACCGCAUACAGUCUUACAGGCUGUUGGGGCUUGUGUUCUUUGCAAUUCACAGACUUCAUUAAGAUGUGGUGCUUGCAUACGUAGACCAUUCUUAUG	16200-16312	-34.1	>MT358637.1_317	Multibranch-No prediction	Multibranch-No prediction	No	No
635	>MT358637.1_318	UGCUUGCAUACGUAGACCAUUCUUAUGUUGUAAAUGCUGUUACGACCAUGUCAUAUCAACAUCACAUAAAUUAGUCUUGUCUGUUAAUCCGUAUGUUUGCA	16286-16386	-30.8	>MT358637.1_318	ACCAUUCUUAUGUUGUAAAUGC	AACAUCACAUAAAUUAGUCUUG	Yes	Yes
637	>MT358637.1_319	GUUACGACCAUGUCAUAUCAACAUCACAUAAAUUAGUCUUGUCUGUUAAUCCGUAUGUUUGCAAUGCUCCAGGUUGUGAUGUCACAGAUGUGAC	16324-16417	-26.3	>MT358637.1_319	ACAUCACAUAAAUUAGUCUUGUC	AAUGCUCCAGGUUGUGAUGUCA	Yes	Yes
639	>MT358637.1_320	AUGUUUGCAAUGCUCCAGGUUGUGAUGUCACAGAUGUGACUCAACUUUACUUAGGAGGUAUGAGCUAUUAUUGUAAAUCACAUAAACCACCCAUUAGUUUUCCAU	16378-16482	-24.6	>MT358637.1_320	AUGUUUGCAAUGCUCCAGGUU	UAUGAGCUAUUAUUGUAAAUCAC	Yes	Yes
641	>MT358637.1_321	UAUGAGCUAUUAUUGUAAAUCACAUAAACCACCCAUUAGUUUUCCAUUGUGUGCUAAUGGACAAGUUUUUGGUUUAUAUAAAAAUACAUGUGUUGGUAGCGAUA	16436-16539	-29.8	>MT358637.1_321	AUCACAUAAACCACCCAUUAGU	UAAUGGACAAGUUUUUGGUUUAU	Yes	Yes
643	>MT358637.1_322	UACAUGUGUUGGUAGCGAUAAUGUUACUGACUUUAAUGCAAUUGCAACAUGUGACUGGACAAAUGCUGGUGAUUACAUUUUAGCUAACACCUGUA	16520-16614	-29.9	>MT358637.1_322	UGUGUUGGUAGCGAUAAUGUU	CAUUUUAGCUAACACCUGUA	Yes	Yes
645	>MT358637.1_323	AUGUGACUGGACAAAUGCUGGUGAUUACAUUUUAGCUAACACCUGUACUGAAAGACUCAAGCUUUUUGCAGCAGAAACGCUCAAAGCUACUGAGGAGACAU	16568-16668	-24.9	>MT358637.1_323	Multibranch-No prediction	Multibranch-No prediction	No	No
647	>MT358637.1_324	UUUUGCAGCAGAAACGCUCAAAGCUACUGAGGAGACAUUUAAACUGUCUUAUGGUAUUGCUACUGUACGUGAAGUGCUGUCUGA	16631-16714	-27.6	>MT358637.1_324	CGCUCAAAGCUACUGAGGAGA	UAUGGUAUUGCUACUGUACGUGA	Yes	Yes
649	>MT358637.1_325	UUAAACUGUCUUAUGGUAUUGCUACUGUACGUGAAGUGCUGUCUGACAGAGAAUUACAUCUUUCAUGGGAAGUUGGUAAACCUAGACCACCACUUAA	16669-16765	-23.5	>MT358637.1_325	UAUUGCUACUGUACGUGAAGUG	UACAUCUUUCAUGGGAAGUUG	Yes	Yes
651	>MT358637.1_326	UUUCAUGGGAAGUUGGUAAACCUAGACCACCACUUAACCGAAAUUAUGUCUUUACUGGUUAUCGUGUAACUAAAAACAGUAAAGUACAAAUAGGAGAGUACACCUUUGAAA	16729-16839	-22.1	>MT358637.1_326	Multibranch-No prediction	Multibranch-No prediction	No	No
653	>MT358637.1_327	UGUAACUAAAAACAGUAAAGUACAAAUAGGAGAGUACACCUUUGAAAAAGGUGACUAUGGUGAUGCUGUUGUUUACCGAGGUACA	16793-16877	-25.2	>MT358637.1_327	UAAAGUACAAAUAGGAGAGUAC	UGACUAUGGUGAUGCUGUUGUUU	Yes	Yes
655	>MT358637.1_328	AGGUGACUAUGGUGAUGCUGUUGUUUACCGAGGUACAACAACUUACAAAUUAAAUGUUGGUGAUUAUUUUGUGCUGACAUCACAUACAGUAAUGCCAUUAAGUGCACCU	16841-16949	-38.7	>MT358637.1_328	UACCGAGGUACAACAACUUACA	UGAUUAUUUUGUGCUGACAUCA	Yes	Yes
657	>MT358637.1_329	GUAAUGCCAUUAAGUGCACCUACACUAGUGCCACAAGAGCACUAUGUUAGAAUUACUGGCUUAUAC	16929-16994	-20.6	>MT358637.1_329	UAAUGCCAUUAAGUGCACCUACA	UGUUAGAAUUACUGGCUUAUAC	Yes	Yes
659	>MT358637.1_330	UACCCAACACUCAAUAUCUCAGAUGAGUUUUCUAGCAAUGUUGCAAAUUAUCAAAAGGUUGGUAUGCAAAAGUAUUCUACACUCCAGGGACCACCUGGUA	16992-17091	-21.5	>MT358637.1_330	Multibranch-No prediction	Multibranch-No prediction	No	No
661	>MT358637.1_331	GGUUGGUAUGCAAAAGUAUUCUACACUCCAGGGACCACCUGGUACUGGUAAGAGUCAUUUUGCUAUUGGCCUAGCU	17048-17123	-26.3	>MT358637.1_331	UGCAAAAGUAUUCUACACUCC	UACUGGUAAGAGUCAUUUUGCU	Yes	Yes
663	>MT358637.1_332	CAGGGACCACCUGGUACUGGUAAGAGUCAUUUUGCUAUUGGCCUAGCUCUCUACUACCCUUCUGCUCGCAUAGUGUAUACAGCUUGCUCUCAUGCCGCUGUUGAUG	17076-17181	-26.5	>MT358637.1_332	Multibranch-No prediction	Multibranch-No prediction	No	No
665	>MT358637.1_333	UCUGCUCGCAUAGUGUAUACAGCUUGCUCUCAUGCCGCUGUUGAUGCACUAUGUGAGAAGG	17136-17196	-29.6	>MT358637.1_333	UCUGCUCGCAUAGUGUAUACAGC	UUGAUGCACUAUGUGAGAAGG	Yes	Yes
667	>MT358637.1_334	UCAUGCCGCUGUUGAUGCACUAUGUGAGAAGGCAUUAAAAUAUUUGCCUAUAGAUAAAUGUAGUAGAAUUAUACCUGCACGUGCUCGUGUAGAGUGUUUUGA	17165-17266	-27.7	>MT358637.1_334	Multibranch-No prediction	Multibranch-No prediction	No	No
669	>MT358637.1_335	UUGAUAAAUUCAAAGUGAAUUCAACAUUAGAACAGUAUGUCUUUUGUACUGUAAAUGCAUUGCCUGAGACGACAGCAGAUAUAGUUGUCUUUGAUGAAAUUUCAA	17263-17367	-28.6	>MT358637.1_335	Multibranch-No prediction	Multibranch-No prediction	No	No
671	>MT358637.1_336	UCAAAGUGAAUUCAACAUUAGAACAGUAUGUCUUUUGUACUGUAAAUGCAUUGCCUGAGACGACAGCAGAUAUAGUUGUCUUUGAUGAAAUUUCAAUGG	17272-17370	-26.1	>MT358637.1_336	ACAGUAUGUCUUUUGUACUGUA	GACGACAGCAGAUAUAGUUGUC	Yes	Yes
673	>MT358637.1_337	UGUAAAUGCAUUGCCUGAGACGACAGCAGAUAUAGUUGUCUUUGAUGAAAUUUCAAUGGCCACAAAUUAUGAUUUGAGUGUUGUCAAUGCCAGAUUACGUGCUAAGCA	17312-17419	-27.1	>MT358637.1_337	UGCCUGAGACGACAGCAGAUA	UUUGAGUGUUGUCAAUGCCAGA	Yes	Yes
675	>MT358637.1_338	AAUUUCAAUGGCCACAAAUUAUGAUUUGAGUGUUGUCAAUGCCAGAUUACGUGCUAAGCACUAUGUGUACAUUGGCGACCCUGCUCAAUUACCUGCACCACGCACAUU	17360-17467	-25.4	>MT358637.1_338	UGAGUGUUGUCAAUGCCAGAUUA	UGUACAUUGGCGACCCUGCUCA	Yes	Yes
683	>MT358637.1_342	GAACCAGAAUAUUUCAAUUCAGUGUGUAGACUUAUGAAAACUAUAGGUCCAGACAUGUUCCUCGGAACUUGUCGGCGUUGUCCUGCUGAAAUUGUUGACACUGUGAGUGCUUUGGUUU	17487-17604	-35.6	>MT358637.1_342	Multibranch-No prediction	Multibranch-No prediction	No	No
685	>MT358637.1_343	GGAACUUGUCGGCGUUGUCCUGCUGAAAUUGUUGACACUGUGAGUGCUUUGGUUUAUGAUAAUAAGCUUAAAGCACAUAAAGACAAAUCAGCUCAAUGCUUUAAAAUGUUUU	17550-17661	-36.8	>MT358637.1_343	CGGCGUUGUCCUGCUGAAAUUG	CAAAUCAGCUCAAUGCUUUA	Yes	Yes
689	>MT358637.1_345	CUUUAAAAUGUUUUAUAAGGGUGUUAUCACGCAUGAUGUUUCAUCUGCAAUUAACAGGCCACAAAUAGGCGUGGUAAGAGAAUUCCUUACACGUAACCCUGCUUGGAG	17648-17755	-30.5	>MT358637.1_345	Multibranch-No prediction	Multibranch-No prediction	No	No
693	>MT358637.1_347	AGGCCACAAAUAGGCGUGGUAAGAGAAUUCCUUACACGUAACCCUGCUUGGAGAAAAGCUGUCUUUAUUUCACCUUAUAAUUCACAGAAUGCUGUAGCCU	17703-17802	-21	>MT358637.1_347	AGGCGUGGUAAGAGAAUUCCUUAC	UCUUUAUUUCACCUUAUAAUU	Yes	Yes
699	>MT358637.1_350	CUAUGUCAUAUUCACUCAAACCACUGAAACAGCUCACUCUUGUAAUGUAAACAGAUUUAAUGUUGCUAUUACCAGAGCAAAAGUAGGCAUACUUUGCAUAAUGUCUGAUAG	17861-17971	-24.5	>MT358637.1_350	Multibranch-No prediction	Multibranch-No prediction	No	No
701	>MT358637.1_351	UUCACUCAAACCACUGAAACAGCUCACUCUUGUAAUGUAAACAGAUUUAAUGUUGCUAUUACCAGAGCAAAAGUAGGCAUACUUUGCAUAAUGUCUGAUAGAG	17871-17973	-23.7	>MT358637.1_351	Multibranch-No prediction	Multibranch-No prediction	No	No
705	>MT358637.1_353	GUUGCAAUUUACAAGUCUUGAAAUUCCACGUAGGAAUGUGGCAACUUUACAAGCUGAAAAUGUAAC	17987-18052	-20.1	>MT358637.1_353	AAUUUACAAGUCUUGAAAUUCC	CAACUUUACAAGCUGAAAAUGU	Yes	Yes
707	>MT358637.1_354	GUAGGAAUGUGGCAACUUUACAAGCUGAAAAUGUAACAGGACUCUUUAAAGAUUGUAGUAAGGUAAUCACUGGGUUACAUCCUACACAGGCACCUAC	18016-18112	-21.3	>MT358637.1_354	UGGCAACUUUACAAGCUGAAAA	UAAAGAUUGUAGUAAGGUAAU	Yes	Yes
709	>MT358637.1_355	UGGGUUACAUCCUACACAGGCACCUACACACCUCAGUGUUGACACUAAAUUCAAAACUGAAGGUUUAUGUGUUGACAUACCUGGCAUACCUA	18086-18177	-27	>MT358637.1_355	ACAGGCACCUACACACCUCAGU	AAGGUUUAUGUGUUGACAUACC	Yes	Yes
711	>MT358637.1_356	AGGUAAUCACUGGGUUACAUCCUACACAGGCACCUACACACCUCAGUGUUGACACUAAAUUCAAAACUGAAGGUUUAUGUGUUGACAUACCUGGCAUACCU	18076-18176	-34.8	>MT358637.1_356	UGGGUUACAUCCUACACAGGCA	AAGGUUUAUGUGUUGACAUACC	Yes	Yes
713	>MT358637.1_357	GUGUUGACAUACCUGGCAUACCUAAGGACAUGACCUAUAGAAGACUCAUCUCUAUGAUGGGUUUUAAAAUGAAUUAUCAAGUUAAUGGUUACCCUAACAUGUUUAUCAC	18154-18262	-29.8	>MT358637.1_357	UAAGGACAUGACCUAUAGAAGAC	GUUUUAAAAUGAAUUAUCAAGU	Yes	Yes
721	>MT358637.1_361	UGUUGGUACCAAUUUACCUUUACAGCUAGGUUUUUCUACAGGUGUUAACCUAGUUGCUGUACCUACAGGUUAUGUUGAUACACCUA	18338-18423	-23.3	>MT358637.1_361	Multibranch-No prediction	Multibranch-No prediction	No	No
725	>MT358637.1_363	AGGUGUUAACCUAGUUGCUGUACCUACAGGUUAUGUUGAUACACCUAAUAAUACAGAUUUUUCCAGAGUUAGUGCUAAACCACCGCCUGGAGAUCAAUUUAAACACCU	18377-18484	-27	>MT358637.1_363	Multibranch-No prediction	Multibranch-No prediction	No	No
731	>MT358637.1_366	AUCUCUCUGACAGAGUCGUAUUUGUCUUAUGGGCACAUGGCUUUGAGUUGACAUCUAUGAAGUAUUUUGUGAAAAUAGGACCUGAGCGCACCUGUUGUCUAUGUGAU	18565-18671	-31	>MT358637.1_366	UGUCUUAUGGGCACAUGGCUUU	AAGUAUUUUGUGAAAAUAGGA	Yes	Yes
733	>MT358637.1_367	AGUAUUUUGUGAAAAUAGGACCUGAGCGCACCUGUUGUCUAUGUGAUAGACGUGCCACAUGCUUUUCCACUGCUUCAGACACUUAUGCCUGUUGGCAUCAUUCUAUU	18625-18731	-27	>MT358637.1_367	Multibranch-No prediction	Multibranch-No prediction	No	No
735	>MT358637.1_368	GUGAUAGACGUGCCACAUGCUUUUCCACUGCUUCAGACACUUAUGCCUGUUGGCAUCAUUCUAUUGGAUUUGAUUACGUCUAUAAU	18667-18752	-26.8	>MT358637.1_368	AGACGUGCCACAUGCUUUUCC	UAUUGGAUUUGAUUACGUCUAU	Yes	Yes
737	>MT358637.1_369	ACUUAUGCCUGUUGGCAUCAUUCUAUUGGAUUUGAUUACGUCUAUAAUCCGUUUAUGAUUGAUGUUCAACAAUGGGGUUUUACAGGU	18705-18791	-25	>MT358637.1_369	UGUUGGCAUCAUUCUAUUGGAU	UCCGUUUAUGAUUGAUGUUCAA	Yes	Yes
739	>MT358637.1_370	UUAUGAUUGAUGUUCAACAAUGGGGUUUUACAGGUAACCUACAAAGCAACCAUGAUCUGUAUUGUCAAGUCCAUGGUAAUGCACAUGUAGCUAGUUGUGAUGCAAUCAUGA	18757-18867	-28.5	>MT358637.1_370	AACCUACAAAGCAACCAUGAU	UAAUGCACAUGUAGCUAGUUGU	Yes	Yes
741	>MT358637.1_371	AGUCCAUGGUAAUGCACAUGUAGCUAGUUGUGAUGCAAUCAUGACUAGGUGUCUAGCUGUCCACGAGUGCUUUGUUAAGCGUGUUGACUGGACU	18824-18917	-30.3	>MT358637.1_371	Multibranch-No prediction	Multibranch-No prediction	No	No
743	>MT358637.1_372	GUGUCUAGCUGUCCACGAGUGCUUUGUUAAGCGUGUUGACUGGACUAUUGAAUAUCCUAUAAUUGGUGAUGAACUGAAGAUUAAUGCGGCUUGUAGAAAGGUUCAACAC	18872-18980	-24	>MT358637.1_372	Multibranch-No prediction	Multibranch-No prediction	No	No
745	>MT358637.1_373	AAUUGGUGAUGAACUGAAGAUUAAUGCGGCUUGUAGAAAGGUUCAACACAUGGUUGUUAAAGCUGCAUUAUUAGCAGACAAAUUCCCAGUU	18932-19022	-27.8	>MT358637.1_373	AAGAUUAAUGCGGCUUGUAGA	UUAAAGCUGCAUUAUUAGCAG	Yes	Yes
747	>MT358637.1_374	UGCAUUAUUAGCAGACAAAUUCCCAGUUCUUCACGACAUUGGUAACCCUAAAGCUAUUAAGUGUGUACCUCAAGCUGAUGUAGAAUGGAAGUUCUAUGAUGCA	18995-19097	-25.5	>MT358637.1_374	UCCCAGUUCUUCACGACAUUGG	AAGCUGAUGUAGAAUGGAAGU	Yes	Yes
749	>MT358637.1_375	AGUGUGUACCUCAAGCUGAUGUAGAAUGGAAGUUCUAUGAUGCACAGCCUUGUAGUGACAAAGCUUAUAAAAUAGAAGAAUUAUUCUAUUCUUAUGCCACACAUU	19054-19158	-35	>MT358637.1_375	Multibranch-No prediction	Multibranch-No prediction	No	No
755	>MT358637.1_378	UAUUCUUAUGCCACACAUUCUGACAAAUUCACAGAUGGUGUAUGCCUAUUUUGGAAUUGCAAUGUCGAUAGAUAUCCUGCUAAUUCCAUUGUUUGUAGAUUUGACACUAGAGUG	19140-19253	-25.6	>MT358637.1_378	UGACAAAUUCACAGAUGGUGU	UUCCAUUGUUUGUAGAUUUGAC	Yes	Yes
757	>MT358637.1_379	UCACAGAUGGUGUAUGCCUAUUUUGGAAUUGCAAUGUCGAUAGAUAUCCUGCUAAUUCCAUUGUUUGUAGAUUUGACACUAGAGUGCUAUCUAACCUUAACUUGCCUGGUUGUGA	19168-19282	-27	>MT358637.1_379	Multibranch-No prediction	Multibranch-No prediction	No	No
759	>MT358637.1_380	UGUUUGUAGAUUUGACACUAGAGUGCUAUCUAACCUUAACUUGCCUGGUUGUGAUGGUGGCAGUUUGUAUGUAAAUAAACA	19229-19309	-23.9	>MT358637.1_380	UUGACACUAGAGUGCUAUCUAAC	UUGUGAUGGUGGCAGUUUGUAU	Yes	Yes
761	>MT358637.1_381	UAUGUAAAUAAACAUGCAUUCCACACACCAGCUUUUGAUAAAAGUGCUUUUGUUAAUUUAAAACAAUUACCAUUUUUCUAUUACUCUGACAGUCCAUGUGAGUCUCAUG	19296-19404	-23.9	>MT358637.1_381	ACCAGCUUUUGAUAAAAGUGCUU	ACCAUUUUUCUAUUACUCUGAC	Yes	Yes
763	>MT358637.1_382	CAUUUUUCUAUUACUCUGACAGUCCAUGUGAGUCUCAUGGAAAACAAGUAGUGUCAGAUAUAGAUUAUG	19366-19434	-20.8	>MT358637.1_382	CAUUUUUCUAUUACUCUGACAGUCC	UAGUGUCAGAUAUAGAUUAUG	Yes	Yes
765	>MT358637.1_383	CUCAUGGAAAACAAGUAGUGUCAGAUAUAGAUUAUGUACCACUAAAGUCUGCUACGUGUAUAACACGUUGCAAUUUAGGUGGUGCUGUCUGUAGACAUCAUGCUAAUGAG	19399-19508	-43.7	>MT358637.1_383	UCAGAUAUAGAUUAUGUACCAC	UGGUGCUGUCUGUAGACAUCAU	Yes	Yes
767	>MT358637.1_384	UAGGUGGUGCUGUCUGUAGACAUCAUGCUAAUGAGUACAGAUUGUAUCUCGAUGCUUAUAACAUGAUGAUCUCAGCUGGCUUUAGCUUGUGGGUUUACAAACAAUUUGAUACUUA	19474-19588	-35.1	>MT358637.1_384	Multibranch-No prediction	Multibranch-No prediction	No	No
773	>MT358637.1_387	ACAAGACUUCAGAGUUUAGAAAAUGUGGCUUUUAAUGUUGUAAAUAAGGGACACUUUGAUGGACAACAGGGUGAAGUACCAGUUUCUAUCAUUAAUAACACUGU	19608-19711	-27.1	>MT358637.1_387	UGGCUUUUAAUGUUGUAAAUA	UGGACAACAGGGUGAAGUACCA	Yes	Yes
775	>MT358637.1_388	AACAGGGUGAAGUACCAGUUUCUAUCAUUAAUAACACUGUUUACACAAAAGUUGAUGGUGUUGAUGUAGAAUUGUUUGAAAAUAAAACAACAUUACCUGUU	19672-19772	-23.5	>MT358637.1_388	AGUUUCUAUCAUUAAUAACACU	UGGUGUUGAUGUAGAAUUGUU	Yes	Yes
777	>MT358637.1_389	UUGAUGGUGUUGAUGUAGAAUUGUUUGAAAAUAAAACAACAUUACCUGUUAAUGUAGCAUUUGAGCUUUGGGCUAAGCGCAACAUUAAACCAGUACCAG	19723-19821	-20.2	>MT358637.1_389	Multibranch-No prediction	Multibranch-No prediction	No	No
781	>MT358637.1_391	UGGGCUAAGCGCAACAUUAAACCAGUACCAGAGGUGAAAAUACUCAAUAAUUUGGGUGUGGACAUUGCUGCUAAUACUGUGAUCUGGGACUA	19791-19882	-23.8	>MT358637.1_391	Multibranch-No prediction	Multibranch-No prediction	No	No
783	>MT358637.1_392	CAAAAGAGAUGCUCCAGCACAUAUAUCUACUAUUGGUGUUUGUUCUAUGACUGACAUAGCCAAGAAACCAACUGAAACGAUUUGUGCACCACUCACUGUCUUUUUUG	19883-19989	-32.2	>MT358637.1_392	CAGCACAUAUAUCUACUAUUGG	CAACUGAAACGAUUUGUGCACCA	Yes	Yes
785	>MT358637.1_393	ACCAACUGAAACGAUUUGUGCACCACUCACUGUCUUUUUUGAUGGUAGAGUUGAUGGUCAAGUAGACUUAUUUAGAAAUGCCCGUAAUGGUGUUCUUAUUACAGAAGGU	19949-20057	-30.8	>MT358637.1_393	Multibranch-No prediction	Multibranch-No prediction	No	No
787	>MT358637.1_394	UGGUAGAGUUGAUGGUCAAGUAGACUUAUUUAGAAAUGCCCGUAAUGGUGUUCUUAUUACAGAAGGUAGUGUUAAAGGUUUACAACCAUCUGUAGGUCCCA	19991-20091	-29	>MT358637.1_394	AAGUAGACUUAUUUAGAAAUGCC	UAGUGUUAAAGGUUUACAACC	Yes	Yes
789	>MT358637.1_395	GACUUAUUUAGAAAUGCCCGUAAUGGUGUUCUUAUUACAGAAGGUAGUGUUAAAGGUUUACAACCAUCUGUAGGUCCCAAACAAGCUAGUCUUAAUGGAGUC	20013-20114	-32.5	>MT358637.1_395	UGUUCUUAUUACAGAAGGUAGU	AACCAUCUGUAGGUCCCAAACA	Yes	Yes
791	>MT358637.1_396	ACCAUCUGUAGGUCCCAAACAAGCUAGUCUUAAUGGAGUCACAUUAAUUGGAGAAGCCGUAAAAACACAGUUCAAUUAUUAUAAGAAAGUUGAUGGU	20075-20171	-22.1	>MT358637.1_396	CAAGCUAGUCUUAAUGGAGUCA	UAAAAACACAGUUCAAUUAUUAUAAGAAAGUU	Yes	Yes
797	>MT358637.1_399	GAUUUCUUAGAAUUAGCUAUGGAUGAAUUCAUUGAACGGUAUAAAUUAGAAGGCUAUGCCUUCGAACAUAUCGUUUAUGGAGAUUUUAGUCAUAGUCAGUUAGGUGGUU	20253-20361	-35.3	>MT358637.1_399	UAGCUAUGGAUGAAUUCAUUGA	AUGGAGAUUUUAGUCAUAGUCA	Yes	Yes
799	>MT358637.1_400	UCGUUUAUGGAGAUUUUAGUCAUAGUCAGUUAGGUGGUUUACAUCUACUGAUUGGACUAGCUAAACGUUUUAAGGAAUCACCUUUUGAAUUAGAAGAUUUUAUUCCUAUGG	20323-20433	-26	>MT358637.1_400	Multibranch-No prediction	Multibranch-No prediction	No	No
801	>MT358637.1_401	CAUCUACUGAUUGGACUAGCUAAACGUUUUAAGGAAUCACCUUUUGAAUUAGAAGAUUUUAUUCCUAUGGACAGUACAGUUAAAAACUAUUUCAUAACAGAUG	20364-20466	-26	>MT358637.1_401	CUAGCUAAACGUUUUAAGGAAUCA	AUUUUAUUCCUAUGGACAGUAC	Yes	Yes
803	>MT358637.1_402	AGGUGGUUUACAUCUACUGAUUGGACUAGCUAAACGUUUUAAGGAAUCACCUUUUGAAUUAGAAGAUUUUAUUCCUAUGGACAGUACAGUUAAAAACUAUUU	20354-20455	-24.9	>MT358637.1_402	Multibranch-No prediction	Multibranch-No prediction	No	No
807	>MT358637.1_404	AUCCCAAGAUUUAUCUGUAGUUUCUAAGGUUGUCAAAGUGACUAUUGACUAUACAGAAAUUUCAUUUAUGCUUUGGUGU	20540-20618	-21.1	>MT358637.1_404	UUAUCUGUAGUUUCUAAGGUUG	ACUAUACAGAAAUUUCAUUUAU	Yes	Yes
809	>MT358637.1_405	GGUUGUCAAAGUGACUAUUGACUAUACAGAAAUUUCAUUUAUGCUUUGGUGUAAAGAUGGCCAUGUAGAAACAUUUUACCCAAAAUUACAAUCUAGUCAAGCGUGGCAACC	20567-20677	-29.2	>MT358637.1_405	CAUUUAUGCUUUGGUGUAAAGA	UUUUACCCAAAAUUACAAUCU	Yes	Yes
811	>MT358637.1_406	AGAAAUUUCAUUUAUGCUUUGGUGUAAAGAUGGCCAUGUAGAAACAUUUUACCCAAAAUUACAAUCUAGUCAAGCGUGGCAACCGGGUGUUGCUAUGCCUAAUCU	20594-20698	-25.1	>MT358637.1_406	Multibranch-No prediction	Multibranch-No prediction	No	No
813	>MT358637.1_407	GCAAAGAAUGCUAUUAGAAAAGUGUGACCUUCAAAAUUAUGGUGAUAGUGCAACAUUACCUAAAGGCAUAAUGAUGAAUGUCGCAAAAUAUACUCAACUGUGU	20708-20810	-26	>MT358637.1_407	Multibranch-No prediction	Multibranch-No prediction	No	No
815	>MT358637.1_408	GCUGUACCCUAUAAUAUGAGAGUUAUACAUUUUGGUGCUGGUUCUGAUAAAGGAGUUGCACCAGGUACAGCUGUUUUAAGACAGU	20835-20919	-24.4	>MT358637.1_408	UACAUUUUGGUGCUGGUUCUGA	AAAGGAGUUGCACCAGGUACA	Yes	Yes
817	>MT358637.1_409	GGAGUUGCACCAGGUACAGCUGUUUUAAGACAGUGGUUGCCUACGGGUACGCUGCUUGUCGAUUCAGAUCUUAAUGACUUUGUCUCUGAUGCAGAUUC	20886-20983	-32.3	>MT358637.1_409	UACAGCUGUUUUAAGACAGUGG	GCUGCUUGUCGAUUCAGAUCU	Yes	Yes
819	>MT358637.1_410	GGAGUUGCACCAGGUACAGCUGUUUUAAGACAGUGGUUGCCUACGGGUACGCUGCUUGUCGAUUCAGAUCUUAAUGACUUUGUCUCUGAUGCAGAUUCAACUUU	20886-20989	-24.5	>MT358637.1_410	UACAGCUGUUUUAAGACAGUGG	GCUGCUUGUCGAUUCAGAUCU	Yes	Yes
823	>MT358637.1_412	UCUUAAUGACUUUGUCUCUGAUGCAGAUUCAACUUUGAUUGGUGAUUGUGCAACUGUACAUACAGCUAAUAAAUGGGAUCUCAUUAUUAGUGAUAUGUACGACCCUAAGA	20954-21063	-27.2	>MT358637.1_412	AGAUUCAACUUUGAUUGGUGAUU	CAGCUAAUAAAUGGGAUCUCA	Yes	Yes
825	>MT358637.1_413	UUCAACUUUGAUUGGUGAUUGUGCAACUGUACAUACAGCUAAUAAAUGGGAUCUCAUUAUUAGUGAUAUGUACGACCCUAAGACUAAAAAUGUUACAAAAGAA	20981-21083	-25.7	>MT358637.1_413	UGGUGAUUGUGCAACUGUACAUAC	AUAUGUACGACCCUAAGACUAA	Yes	Yes
829	>MT358637.1_415	GGGUUUUUUCACUUACAUUUGUGGGUUUAUACAACAAAAGCUAGCUCUUGGAGGUUCCGUGGCUAUAAAGAUAACAGAACAUUCUUGGAAUGCUGAUCUUUAUAAGCUC	21098-21206	-21.1	>MT358637.1_415	Multibranch-No prediction	Multibranch-No prediction	No	No
835	>MT358637.1_418	UUCGCAUGGUGGACAGCCUUUGUUACUAAUGUGAAUGCGUCAUCAUCUGAAGCAUUUUUAAUUGGAUGUAAUUAUCUUGGCAAACCACGCGAA	21216-21308	-28.6	>MT358637.1_418	UUUGUUACUAAUGUGAAUGC	AUUUUUAAUUGGAUGUAAUUA	Yes	Yes
837	>MT358637.1_419	CUGAAGCAUUUUUAAUUGGAUGUAAUUAUCUUGGCAAACCACGCGAACAAAUAGAUGGUUAUGUCAUGCAUGCAAAUUACAUAUUUUGGAGGAAUACAAAUCCAAUUCAG	21262-21371	-26.4	>MT358637.1_419	Multibranch-No prediction	Multibranch-No prediction	No	No
839	>MT358637.1_420	AAAUCCAAUUCAGUUGUCUUCCUAUUCUUUAUUUGACAUGAGUAAAUUUCCCCUUAAAUUAAGGGGUACUGCUGUUAUGUCUUUAAAAGAAGGUCAAAUCAAUGAUAUGAUUU	21359-21471	-32.4	>MT358637.1_420	UAUUCUUUAUUUGACAUGAGUA	UUAUGUCUUUAAAAGAAGGUC	Yes	Yes
841	>MT358637.1_421	AGGGGUACUGCUGUUAUGUCUUUAAAAGAAGGUCAAAUCAAUGAUAUGAUUUUAUCUCUUCUUAGUAAAGGUAGACUUAUAAUUAGAGAAAACAACAGAGUUGUUAUUUCU	21420-21530	-31.7	>MT358637.1_421	Multibranch-No prediction	Multibranch-No prediction	No	No
851	>MT358637.1_426	ACUAAUUCUUUCACACGUGGUGUUUAUUACCCUGACAAAGUUUUCAGAUCCUCAGUUUUACAUUCAACUCAGGACUUGUUCUUACCUUUCUUUUCCAAUGUUACUUGGU	21646-21754	-23.4	>MT358637.1_426	Multibranch-No prediction	Multibranch-No prediction	No	No
853	>MT358637.1_427	CAGGACUUGUUCUUACCUUUCUUUUCCAAUGUUACUUGGUUCCAUGCUAUACAUGUCUCUGGGACCAAUGGUACUAAGAGGUUUGAUAACCCUG	21715-21808	-32	>MT358637.1_427	UCUUUUCCAAUGUUACUUGGUU	UGGGACCAAUGGUACUAAGAGG	Yes	Yes
861	>MT358637.1_431	CUGUGAAUUUCAAUUUUGUAAUGAUCCAUUUUUGGGUGUUUAUUACCACAAAAACAACAAAAGUUGGAUGGAAAGUGAGUUCAGAGUUUAUUCUAG	21951-22046	-22.4	>MT358637.1_431	UGUAAUGAUCCAUUUUUGGGU	ACAAAAGUUGGAUGGAAAGUGA	Yes	Yes
863	>MT358637.1_432	CCACAAAAACAACAAAAGUUGGAUGGAAAGUGAGUUCAGAGUUUAUUCUAGUGCGAAUAAUUGCACUUUUGAAUAUGUCUCUCAGCCUUUUCUUAUGG	21996-22093	-22.2	>MT358637.1_432	Multibranch-No prediction	Multibranch-No prediction	No	No
867	>MT358637.1_434	AGGGUAAUUUCAAAAAUCUUAGGGAAUUUGUGUUUAAGAAUAUUGAUGGUUAUUUUAAAAUAUAUUCUAAGCACACGCCUAUUAAUUUAGUGCGUGAUCUCCCU	22109-22212	-25.8	>MT358637.1_434	Multibranch-No prediction	Multibranch-No prediction	No	No
869	>MT358637.1_435	GCCUAUUAAUUUAGUGCGUGAUCUCCCUCAGGGUUUUUCGGCUUUAGAACCAUUGGUAGAUUUGCCAAUAGGUAUUAACAUCACUAGGU	22185-22273	-26.9	>MT358637.1_435	UGCGUGAUCUCCCUCAGGGUUU	ACCAUUGGUAGAUUUGCCAAU	Yes	Yes
871	>MT358637.1_436	GUAGAUUUGCCAAUAGGUAUUAACAUCACUAGGUUUCAAACUUUACUUGCUUUACAUAGAAGUUAUUUGACUCCUGGUGAUUCUUCUUCAGGUUGGACAGCUGGUGCUGC	22240-22349	-34.3	>MT358637.1_436	Multibranch-No prediction	Multibranch-No prediction	No	No
881	>MT358637.1_441	CUUCACUGUAGAAAAAGGAAUCUAUCAAACUUCUAACUUUAGAGUCCAACCAACAGAAUCUAUUGUUAGAUUUCCUAAUAUUACAAACUUGUGCCCUUUUGGUGAAG	22476-22582	-26	>MT358637.1_441	UCAAACUUCUAACUUUAGAGUC	AUCUAUUGUUAGAUUUCCUA	Yes	Yes
883	>MT358637.1_442	UUGUUAGAUUUCCUAAUAUUACAAACUUGUGCCCUUUUGGUGAAGUUUUUAACGCCACCAGAUUUGCAUCUGUUUAUGCUUGGAACAGGAAGAGAAUCAGCAA	22538-22640	-31.3	>MT358637.1_442	UUACAAACUUGUGCCCUUUUGGU	CCAGAUUUGCAUCUGUUUAUGC	Yes	Yes
885	>MT358637.1_443	AACGCCACCAGAUUUGCAUCUGUUUAUGCUUGGAACAGGAAGAGAAUCAGCAACUGUGUUGCUGAUUAUUCUGUCCUAUAUAAUUCCGCAUCAUUUUCCACUUUUAAGUGUU	22588-22699	-32.5	>MT358637.1_443	Multibranch-No prediction	Multibranch-No prediction	No	No
887	>MT358637.1_444	UGUUAUGGAGUGUCUCCUACUAAAUUAAAUGAUCUCUGCUUUACUAAUGUCUAUGCAGAUUCAUUUGUAAUUAGAGGUGAUGAAGUCAGACAAAUCGCUCCAGGGCA	22696-22802	-36.3	>MT358637.1_444	UACUAAAUUAAAUGAUCUCUGC	CAGAUUCAUUUGUAAUUAGAGG	Yes	Yes
889	>MT358637.1_445	UCAUUUGUAAUUAGAGGUGAUGAAGUCAGACAAAUCGCUCCAGGGCAAACUGGAAAGAUUGCUGAUUAUAAUUAUAAAUUACCAGAUGA	22756-22844	-27.3	>MT358637.1_445	UGAAGUCAGACAAAUCGCUCC	AAAGAUUGCUGAUUAUAAUU	Yes	Yes
891	>MT358637.1_446	AUUACCAGAUGAUUUUACAGGCUGCGUUAUAGCUUGGAAUUCUAACAAUCUUGAUUCUAAGGUUGGUGGUAAUUAUAAUUACCUGUAUAGAUUGUUUAGGAAGU	22833-22936	-29.9	>MT358637.1_446	UGAUUUUACAGGCUGCGUUAUA	UAAUUACCUGUAUAGAUUGUUU	Yes	Yes
893	>MT358637.1_447	GGUGGUAAUUAUAAUUACCUGUAUAGAUUGUUUAGGAAGUCUAAUCUCAAACCUUUUGAGAGAGAUAUUUCAACUGAAAUCUAUCAGGCCGGUAGCACACC	22897-22997	-26.5	>MT358637.1_447	AUAGAUUGUUUAGGAAGUCUAA	AGAUAUUUCAACUGAAAUCUAUC	Yes	Yes
895	>MT358637.1_448	AACCUUUUGAGAGAGAUAUUUCAACUGAAAUCUAUCAGGCCGGUAGCACACCUUGUAAUGGUGUUGAAGGUUUUAAUUGUUACUUUCCUUUACAAUCAUAUGGUU	22946-23050	-27.9	>MT358637.1_448	AACUGAAAUCUAUCAGGCCGGU	UGGUGUUGAAGGUUUUAAUUGU	Yes	Yes
897	>MT358637.1_449	GAAAUCUAUCAGGCCGGUAGCACACCUUGUAAUGGUGUUGAAGGUUUUAAUUGUUACUUUCCUUUACAAUCAUAUGGUUUC	22972-23052	-20.9	>MT358637.1_449	AAAUCUAUCAGGCCGGUAGCACA	UACUUUCCUUUACAAUCAUAUG	Yes	Yes
899	>MT358637.1_450	UGAAGGUUUUAAUUGUUACUUUCCUUUACAAUCAUAUGGUUUCCAACCCACUAAUGGUGUUGGUUACCAACCAUACAGAGUAGUAGUACUUUCUUUUGAACUUCUA	23010-23115	-29.1	>MT358637.1_450	UAAUUGUUACUUUCCUUUACAA	ACCAACCAUACAGAGUAGUAGU	Yes	Yes
901	>MT358637.1_451	CAGAGUAGUAGUACUUUCUUUUGAACUUCUACAUGCACCAGCAACUGUUUGUGGACCUAAAAAGUCUACUAAUUUG	23085-23160	-25.2	>MT358637.1_451	UACUUUCUUUUGAACUUCUACA	UGUGGACCUAAAAAGUCUACU	Yes	Yes
903	>MT358637.1_452	AACUGUUUGUGGACCUAAAAAGUCUACUAAUUUGGUUAAAAACAAAUGUGUCAAUUUCAACUUCAAUGGUUUAACAGGCACAGGUGUUCUUACUGAGUCUAACAAAAAGUU	23127-23237	-27.9	>MT358637.1_452	UUAAAAACAAAUGUGUCAAUUU	CAGGCACAGGUGUUCUUACUGA	Yes	Yes
905	>MT358637.1_453	AAAGUCUACUAAUUUGGUUAAAAACAAAUGUGUCAAUUUCAACUUCAAUGGUUUAACAGGCACAGGUGUUCUUACUGAGUCUAACAAAAAGUUUCUGCCUUU	23145-23246	-25.3	>MT358637.1_453	UUAAAAACAAAUGUGUCAAUUU	CAGGCACAGGUGUUCUUACUGA	Yes	Yes
907	>MT358637.1_454	CAGGUGUUCUUACUGAGUCUAACAAAAAGUUUCUGCCUUUCCAACAAUUUGGCAGAGACAUUGCUGACACUACUGAUGCUGUCCGUGAUCCACAGACACUUG	23207-23308	-25.2	>MT358637.1_454	Multibranch-No prediction	Multibranch-No prediction	No	No
909	>MT358637.1_455	ACAGGUGUUCUUACUGAGUCUAACAAAAAGUUUCUGCCUUUCCAACAAUUUGGCAGAGACAUUGCUGACACUACUGAUGCUGU	23206-23288	-23.1	>MT358637.1_455	UGAGUCUAACAAAAAGUUUCUGC	CAGAGACAUUGCUGACACUAC	Yes	Yes
913	>MT358637.1_457	AUGCUGUCCGUGAUCCACAGACACUUGAGAUUCUUGACAUUACACCAUGUUCUUUUGGUGGUGUCAGUGUUAUAACACCAGGAACAAAU	23282-23370	-22.3	>MT358637.1_457	Multibranch-No prediction	Multibranch-No prediction	No	No
915	>MT358637.1_458	CAUGUUCUUUUGGUGGUGUCAGUGUUAUAACACCAGGAACAAAUACUUCUAACCAGGUUGCUGUUCUUUAUCAGGGUGUUAACUGCACAGAAGUCCCUGUUGCUAUUCAUG	23327-23437	-33.5	>MT358637.1_458	CAGUGUUAUAACACCAGGAACA	AUCAGGGUGUUAACUGCACAG	Yes	Yes
917	>MT358637.1_459	UGUUGCUAUUCAUGCAGAUCAACUUACUCCUACUUGGCGUGUUUAUUCUACAGGUUCUAAUGUUUUUCAAACACGUGCAGGCUGUUUAAUAGGGGCUGAACAUGUCAACA	23424-23533	-28.1	>MT358637.1_459	CUCCUACUUGGCGUGUUUAUUC	CAAACACGUGCAGGCUGUUUAA	Yes	Yes
919	>MT358637.1_460	UACUCCUACUUGGCGUGUUUAUUCUACAGGUUCUAAUGUUUUUCAAACACGUGCAGGCUGUUUAAUAGGGGCUGAACAUGUCAACAACUCAUAUGAGUG	23448-23546	-28.9	>MT358637.1_460	Multibranch-No prediction	Multibranch-No prediction	No	No
921	>MT358637.1_461	GUUUUUCAAACACGUGCAGGCUGUUUAAUAGGGGCUGAACAUGUCAACAACUCAUAUGAGUGUGACAUACCCAUUGGUGCAGGUAUAUGCGCUAGUUAUCAGAC	23485-23588	-28	>MT358637.1_461	ACGUGCAGGCUGUUUAAUAGGG	ACAUACCCAUUGGUGCAGGUAU	Yes	Yes
923	>MT358637.1_462	AGUUAUCAGACUCAGACUAAUUCUCCUCGGCGGGCACGUAGUGUAGCUAGUCAAUCCAUCAUUGCCUACACUAUGUCACUUGGUGCAGAAAAUUCAGUUGCUUACUCUAAUAACU	23578-23692	-40.3	>MT358637.1_462	UCGGCGGGCACGUAGUGUAGCU	CUACACUAUGUCACUUGGUGCA	Yes	Yes
925	>MT358637.1_463	CUUGGUGCAGAAAAUUCAGUUGCUUACUCUAAUAACUCUAUUGCCAUACCCACAAAUUUUACUAUUAGUGUUACCACAGAAAUUCUACCAGUGUCUAUGACCAAG	23656-23760	-24.8	>MT358637.1_463	AGAAAAUUCAGUUGCUUACUCU	UGUUACCACAGAAAUUCUACC	Yes	Yes
927	>MT358637.1_464	UUACUAUUAGUGUUACCACAGAAAUUCUACCAGUGUCUAUGACCAAGACAUCAGUAGAUUGUACAAUGUACAUUUGUGGUGAUUCAACUGAAUGCAGCAA	23714-23813	-23.6	>MT358637.1_464	Multibranch-No prediction	Multibranch-No prediction	No	No
929	>MT358637.1_465	GUACAAUGUACAUUUGUGGUGAUUCAACUGAAUGCAGCAAUCUUUUGUUGCAAUAUGGCAGUUUUUGUACACAAUUAAACCGUGCUUUAAC	23774-23864	-24.4	>MT358637.1_465	UUUGUGGUGAUUCAACUGAAUG	UGGCAGUUUUUGUACACAAUUA	Yes	Yes
939	>MT358637.1_470	AUUACCAGAUCCAUCAAAACCAAGCAAGAGGUCAUUUAUUGAAGAUCUACUUUUCAACAAAGUGACACUUGCAGAUGCUGGCUUCAUCAAACAAUAUGGUGAU	23976-24078	-29.2	>MT358637.1_470	Multibranch-No prediction	Multibranch-No prediction	No	No
941	>MT358637.1_471	GCAGAUGCUGGCUUCAUCAAACAAUAUGGUGAUUGCCUUGGUGAUAUUGCUGCUAGAGACCUCAUUUGUGCACAAAAGUUUAACGGCCUUACUGUUUUGCCACCUUUGC	24046-24154	-31.6	>MT358637.1_471	AUUGCCUUGGUGAUAUUGCUGCU	CACAAAAGUUUAACGGCCUUA	Yes	Yes
943	>MT358637.1_472	UGCUAGAGACCUCAUUUGUGCACAAAAGUUUAACGGCCUUACUGUUUUGCCACCUUUGCUCACAGAUGAAAUGAUUGCUCAAUACA	24096-24181	-24.2	>MT358637.1_472	UCAUUUGUGCACAAAAGUUUAA	UGCCACCUUUGCUCACAGAUG	Yes	Yes
945	>MT358637.1_473	CAGAUGAAAUGAUUGCUCAAUACACUUCUGCACUGUUAGCGGGUACAAUCACUUCUGGUUGGACCUUUGGUGCAGGUGCUGCAUUACAAAUACCAUUUG	24158-24256	-31	>MT358637.1_473	UGCUCAAUACACUUCUGCACUG	UGGUGCAGGUGCUGCAUUACA	Yes	Yes
947	>MT358637.1_474	UUCUGGUUGGACCUUUGGUGCAGGUGCUGCAUUACAAAUACCAUUUGCUAUGCAAAUGGCUUAUAGGUUUAAUGGUAUUGGAGUUACACAGAAUGUUCUCUAUGAGAA	24210-24317	-26.5	>MT358637.1_474	CUUUGGUGCAGGUGCUGCAUUA	UUGGAGUUACACAGAAUGUUC	Yes	Yes
949	>MT358637.1_475	UGGUUGGACCUUUGGUGCAGGUGCUGCAUUACAAAUACCAUUUGCUAUGCAAAUGGCUUAUAGGUUUAAUGGUAUUGGAGUUACACAGAAUGUUCUCUAUGAGAACCA	24213-24320	-29.3	>MT358637.1_475	Multibranch-No prediction	Multibranch-No prediction	No	No
955	>MT358637.1_478	AGUGCACUUGGAAAACUUCAAGAUGUGGUCAACCAAAAUGCACAAGCUUUAAACACGCUUGUUAAACAACUUAGCUCCAAUUUUGGUGCAAUUUCAAGUGUUUU	24388-24491	-31.9	>MT358637.1_478	AACUUCAAGAUGUGGUCAACCA	UAGCUCCAAUUUUGGUGCAAUU	Yes	Yes
957	>MT358637.1_479	GCUUGUUAAACAACUUAGCUCCAAUUUUGGUGCAAUUUCAAGUGUUUUAAAUGAUAUCCUUUCACGUCUUGACAAAGUUGAGGCUGAAGUGCAAAUUGAUAGGU	24444-24547	-29.8	>MT358637.1_479	CCAAUUUUGGUGCAAUUUCAA	CACGUCUUGACAAAGUUGAGG	Yes	Yes
959	>MT358637.1_480	AGUUGAGGCUGAAGUGCAAAUUGAUAGGUUGAUCACAGGCAGACUUCAAAGUUUGCAGACAUAUGUGACUCAACAAUUAAUUAGAGCUGCAGAAAUCAGAGCUUCUGCU	24519-24627	-38.7	>MT358637.1_480	AAAUUGAUAGGUUGAUCACAGG	AGACAUAUGUGACUCAACAAUUA	Yes	Yes
961	>MT358637.1_481	GGUUGAUCACAGGCAGACUUCAAAGUUUGCAGACAUAUGUGACUCAACAAUUAAUUAGAGCUGCAGAAAUCAGAGCUUCUGCUAAUCUUGCU	24545-24636	-29	>MT358637.1_481	Multibranch-No prediction	Multibranch-No prediction	No	No
963	>MT358637.1_482	AGCUGCAGAAAUCAGAGCUUCUGCUAAUCUUGCUGCUACUAAAAUGUCAGAGUGUGUACUUGGACAAUCAAAAAGAGUUGAUUUUUGUGGAAAGGGCU	24603-24700	-25.9	>MT358637.1_482	AGAGCUUCUGCUAAUCUUGCUGC	UGGACAAUCAAAAAGAGUUGAU	Yes	Yes
965	>MT358637.1_483	GUCAGAGUGUGUACUUGGACAAUCAAAAAGAGUUGAUUUUUGUGGAAAGGGCUAUCAUCUUAUGUCCUUCCCUCAGUCAGCACCUCAUGGUGUAGUCUUCUUGCAUGUGAC	24648-24758	-36.6	>MT358637.1_483	AGUUGAUUUUUGUGGAAAGGGC	UCCUUCCCUCAGUCAGCACCUC	Yes	Yes
967	>MT358637.1_484	CAGUCAGCACCUCAUGGUGUAGUCUUCUUGCAUGUGACUUAUGUCCCUGCACAAGAAAAGAACUUCACAACUGCUCCUG	24721-24799	-22.5	>MT358637.1_484	UCAUGGUGUAGUCUUCUUGCAU	GCACAAGAAAAGAACUUCACAA	Yes	Yes
969	>MT358637.1_485	UGUCCCUGCACAAGAAAAGAACUUCACAACUGCUCCUGCCAUUUGUCAUGAUGGAAAAGCACACUUUCCUCGUGAAGGUGUCUUUGUUUCAAAUGGCACACA	24762-24863	-30.5	>MT358637.1_485	AUUUGUCAUGAUGGAAAAGCACA	UCUUUGUUUCAAAUGGCACACA	Yes	Yes
975	>MT358637.1_488	UGUGUCUGGUAACUGUGAUGUUGUAAUAGGAAUUGUCAACAACACAGUUUAUGAUCCUUUGCAACCUGAAUUAGACUCA	24924-25002	-21.5	>MT358637.1_488	UGUGUCUGGUAACUGUGAUGUUG	ACAACACAGUUUAUGAUCCUUU	Yes	Yes
977	>MT358637.1_489	GUCAACAACACAGUUUAUGAUCCUUUGCAACCUGAAUUAGACUCAUUCAAGGAGGAGUUAGAUAAAUAUUUUAAGAAUCAUACAUCACCAGAUGUUGAU	24958-25056	-23.4	>MT358637.1_489	UGAUCCUUUGCAACCUGAAUUA	GAUAAAUAUUUUAAGAAUCAUA	Yes	Yes
979	>MT358637.1_490	UGAUCCUUUGCAACCUGAAUUAGACUCAUUCAAGGAGGAGUUAGAUAAAUAUUUUAAGAAUCAUACAUCACCAGAUGUUGAUUUAGGUGACAUCUCUGGCAUUA	24975-25078	-23.4	>MT358637.1_490	Multibranch-No prediction	Multibranch-No prediction	No	No
981	>MT358637.1_491	GAUUUAGGUGACAUCUCUGGCAUUAAUGCUUCAGUUGUAAACAUUCAAAAAGAAAUUGACCGCCUCAAUGAGGUUGCCAAGAAUUUAAAUGAAUC	25054-25148	-25.8	>MT358637.1_491	UCUCUGGCAUUAAUGCUUCAGUUG	CCUCAAUGAGGUUGCCAAGAAU	Yes	Yes
983	>MT358637.1_492	GACCGCCUCAAUGAGGUUGCCAAGAAUUUAAAUGAAUCUCUCAUCGAUCUCCAAGAACUUGGAAAGUAUGAGCAGUAUAUAAAAUGGCCAUGGUACAUUUGGCUAGGUU	25111-25219	-32	>MT358637.1_492	GACCGCCUCAAUGAGGUUGCCA	CCAUGGUACAUUUGGCUAGGUU	Yes	Yes
985	>MT358637.1_493	UCUCCAAGAACUUGGAAAGUAUGAGCAGUAUAUAAAAUGGCCAUGGUACAUUUGGCUAGGUUUUAUAGCUGGCUUGAUUGCCAUAGUAAUGGUGA	25158-25252	-28.1	>MT358637.1_493	AUGAGCAGUAUAUAAAAUGGCC	CUAGGUUUUAUAGCUGGCUUGA	Yes	Yes
987	>MT358637.1_494	AAAGUAUGAGCAGUAUAUAAAAUGGCCAUGGUACAUUUGGCUAGGUUUUAUAGCUGGCUUGAUUGCCAUAGUAAUGGUGACAAUUAUGCUUU	25173-25264	-28.1	>MT358637.1_494	Multibranch-No prediction	Multibranch-No prediction	No	No
989	>MT358637.1_495	GCAGUAUAUAAAAUGGCCAUGGUACAUUUGGCUAGGUUUUAUAGCUGGCUUGAUUGCCAUAGUAAUGGUGACAAUUAUGCUUUGCUGUAUGACCAGUUGCUGU	25182-25284	-29.4	>MT358637.1_495	Multibranch-No prediction	Multibranch-No prediction	No	No
991	>MT358637.1_496	UAGGUUUUAUAGCUGGCUUGAUUGCCAUAGUAAUGGUGACAAUUAUGCUUUGCUGUAUGACCAGUUGCUGUAGUUGUCUCAAGGGCUGUUGUUCUUGUGGAUCCUG	25214-25319	-32.3	>MT358637.1_496	Multibranch-No prediction	Multibranch-No prediction	No	No
993	>MT358637.1_497	UGACAAUUAUGCUUUGCUGUAUGACCAGUUGCUGUAGUUGUCUCAAGGGCUGUUGUUCUUGUGGAUCCUGCUGCAAAUUUGAUGAAGACGACUCUGAGCCAGUGCUCA	25250-25357	-33.6	>MT358637.1_497	Multibranch-No prediction	Multibranch-No prediction	No	No
995	>MT358637.1_498	CUUUGCUGUAUGACCAGUUGCUGUAGUUGUCUCAAGGGCUGUUGUUCUUGUGGAUCCUGCUGCAAAUUUGAUGAAGACGACUCUGAGCCAGUGCUCAAAGGAG	25261-25363	-29.2	>MT358637.1_498	Multibranch-No prediction	Multibranch-No prediction	No	No
999	>MT358637.1_500	UGAGAAUCUUCACAAUUGGAACUGUAACUUUGAAGCAAGGUGAAAUCAAGGAUGCUACUCCUUCAGAUUUUGUUCGCGCUACUGCAACGAUACCGAUACAAGCCUCA	25405-25511	-29	>MT358637.1_500	UUGAAGCAAGGUGAAAUCAAGG	UCAGAUUUUGUUCGCGCUACUG	Yes	Yes
1001	>MT358637.1_501	UGCAACGAUACCGAUACAAGCCUCACUCCCUUUCGGAUGGCUUAUUGUUGGCGUUGCA	25487-25544	-25	>MT358637.1_501	UGCAACGAUACCGAUACAAGCCUC	UGGCUUAUUGUUGGCGUUGCA	Yes	Yes
1005	>MT358637.1_503	GGCAACUAGCACUCUCCAAGGGUGUUCACUUUGUUUGCAACUUGCUGUUGUUGUUUGUAACAGUUUACUCACACCUUUUGCUCGUUGCUGCUGGCC	25597-25692	-33.7	>MT358637.1_503	AGGGUGUUCACUUUGUUUGCA	UAACAGUUUACUCACACCUUUU	Yes	Yes
1007	>MT358637.1_504	CGUUGCUGCUGGCCUUGAAGCCCCUUUUCUCUAUCUUUAUGCUUUAGUCUACUUCUUGCAGAGUAUAAACUUUGUAAGAAUAAUAAUGAGGCUUUGGCUUUGCUGGAAAUG	25679-25789	-34.4	>MT358637.1_504	UGCUUUAGUCUACUUCUUGCA	UAAGAAUAAUAAUGAGGCUUU	Yes	Yes
1009	>MT358637.1_505	GAAGCCCCUUUUCUCUAUCUUUAUGCUUUAGUCUACUUCUUGCAGAGUAUAAACUUUGUAAGAAUAAUAAUGAGGCUUUGGCUUUGCUGGAAAUGCCGUUC	25695-25795	-30.1	>MT358637.1_505	UGCUUUAGUCUACUUCUUGCA	UAAGAAUAAUAAUGAGGCUUU	Yes	Yes
1013	>MT358637.1_507	CCUUACAAUAGUGUAACUUCUUCAAUUGUCAUUACUUCAGGUGAUGGCACAACAAGUCCUAUUUCUGAACAUGACUACCAGAUUGGUGGUUAUACUGAAAAAUGGG	25866-25971	-34.7	>MT358637.1_507	AUUGUCAUUACUUCAGGUGAU	UUUCUGAACAUGACUACCAGAU	Yes	Yes
1015	>MT358637.1_508	GAUUGGUGGUUAUACUGAAAAAUGGGAAUCUGGAGUAAAAGACUGUGUUGUAUUACACAGUUACUUCACUUCAGACUAUUACCAGCUGUACUCAACUCAAUU	25946-26047	-34.9	>MT358637.1_508	AAUGGGAAUCUGGAGUAAAAGA	AGUUACUUCACUUCAGACUAU	Yes	Yes
1017	>MT358637.1_509	UGUUGUAUUACACAGUUACUUCACUUCAGACUAUUACCAGCUGUACUCAACUCAAUUGAGUACAGACACUGGUGUUGAACAUGUUACCUUCUUCAUCUACAAUA	25991-26094	-32.5	>MT358637.1_509	CUUCAGACUAUUACCAGCUGUA	GUACAGACACUGGUGUUGAAC	Yes	Yes
1023	>MT358637.1_512	AAGAACAUGUCCAAAUUCACACAAUCGACGGUUCAUCCGGAGUUGUUAAUCCAGUAAUGGAACCAAUUUAUGAUGAACCGACGACGACUACUAGCGUGCCUU	26113-26214	-37	>MT358637.1_512	GACGGUUCAUCCGGAGUUGUU	CCAAUUUAUGAUGAACCGACGA	Yes	Yes
1025	>MT358637.1_513	UGCCUUUGUAAGCACAAGCUGAUGAGUACGAACUUAUGUACUCAUUCGUUUCGGAAGAGACAGGUACGUUAAUAGUUAAUAGCGUACUUCUUUUUCUUGCUUUCGUGGUA	26209-26318	-36.6	>MT358637.1_513	Multibranch-No prediction	Multibranch-No prediction	No	No
1027	>MT358637.1_514	GGUACGUUAAUAGUUAAUAGCGUACUUCUUUUUCUUGCUUUCGUGGUAUUCUUGCUAGUUACACUAGCCAUCCUUACUGCGCUUCGAUUGUGUGCGUACU	26271-26370	-30.2	>MT358637.1_514	UACGUUAAUAGUUAAUAGCGUA	UGCGCUUCGAUUGUGUGCGUAC	Yes	Yes
1033	>MT358637.1_517	UGUUAAAAAUCUGAAUUCUUCUAGAGUUCCUGAUCUUCUGGUCUAAACGAACUAAAUAUUAUAUUAGUUUUUCUGUUUGGAACUUUAAUUUUAGCCAUGGCA	26426-26527	-25	>MT358637.1_517	Multibranch-No prediction	Multibranch-No prediction	No	No
1037	>MT358637.1_519	UAUUAGUUUUUCUGUUUGGAACUUUAAUUUUAGCCAUGGCAGAUUCCAACGGUACUAUUACCGUUGAAGAGCUUAAAAAGCUCCUUGAACAAUGGAACCUAGUA	26487-26590	-24.6	>MT358637.1_519	GGAACUUUAAUUUUAGCCAUGGCA	GAAGAGCUUAAAAAGCUCCUUG	Yes	Yes
1039	>MT358637.1_520	GAACAAUGGAACCUAGUAAUAGGUUUCCUAUUCCUUACAUGGAUUUGUCUUCUACAAUUUGCCUAUGCCAACAGGAAUAGGUUUUUGUAUAUAAUUAAGUUAAUUUUC	26573-26680	-27.1	>MT358637.1_520	Multibranch-No prediction	Multibranch-No prediction	No	No
1041	>MT358637.1_521	ACAAUUUGCCUAUGCCAACAGGAAUAGGUUUUUGUAUAUAAUUAAGUUAAUUUUCCUCUGGCUGUUAUGGCCAGUAACUUUAGCUUGUUUUGUGCUUGCUGCUGU	26626-26730	-27.5	>MT358637.1_521	Multibranch-No prediction	Multibranch-No prediction	No	No
1043	>MT358637.1_522	CCAACAGGAAUAGGUUUUUGUAUAUAAUUAAGUUAAUUUUCCUCUGGCUGUUAUGGCCAGUAACUUUAGCUUGUUUUGUGCUUGCUGCUGUUUACAGAAUAAAUUGG	26640-26746	-30.1	>MT358637.1_522	UAUAUAAUUAAGUUAAUUUUCCU	UAACUUUAGCUUGUUUUGUGCU	Yes	Yes
1045	>MT358637.1_523	GAUCACCGGUGGAAUUGCUAUCGCAAUGGCUUGUCUUGUAGGCUUGAUGUGGCUCAGCUACUUCAUUGCUUCUUUCAGACUGUUUGCGCGUACGCGUUCCAUGUGGUC	26746-26853	-42	>MT358637.1_523	UGGCUUGUCUUGUAGGCUUGA	CAUUGCUUCUUUCAGACUGUUU	Yes	Yes
1047	>MT358637.1_524	UUCUGACCAGACCGCUUCUAGAAAGUGAACUCGUAAUCGGAGCUGUGAUCCUUCGUGGACAUCUUCGUAUUGCUGGACACCAUCUAGGACGCUGUGACAUCAAGG	26904-27008	-31.3	>MT358637.1_524	AAGUGAACUCGUAAUCGGAGCU	UUCGUAUUGCUGGACACCAUCU	Yes	Yes
1049	>MT358637.1_525	AGUGAACUCGUAAUCGGAGCUGUGAUCCUUCGUGGACAUCUUCGUAUUGCUGGACACCAUCUAGGACGCUGUGACAUCAAGGACCUGCCUAAAGAAAUCACU	26927-27028	-30.9	>MT358637.1_525	Multibranch-No prediction	Multibranch-No prediction	No	No
1051	>MT358637.1_526	CACCAUCUAGGACGCUGUGACAUCAAGGACCUGCCUAAAGAAAUCACUGUUGCUACAUCACGAACGCUUUCUUAUUACAAAUUGGGAGCUUCGCAGCGUGUAGCAGGUG	26981-27089	-35.8	>MT358637.1_526	Multibranch-No prediction	Multibranch-No prediction	No	No
1053	>MT358637.1_527	AGGACCUGCCUAAAGAAAUCACUGUUGCUACAUCACGAACGCUUUCUUAUUACAAAUUGGGAGCUUCGCAGCGUGUAGCAGGUGACUCAGGUUUU	27006-27100	-30.1	>MT358637.1_527	UGCUACAUCACGAACGCUUUC	GAGCUUCGCAGCGUGUAGCAGG	Yes	Yes
1055	>MT358637.1_528	GACCUGCCUAAAGAAAUCACUGUUGCUACAUCACGAACGCUUUCUUAUUACAAAUUGGGAGCUUCGCAGCGUGUAGCAGGUGACUCAGGUUUUGCUGCAUACAGUC	27008-27113	-31	>MT358637.1_528	Multibranch-No prediction	Multibranch-No prediction	No	No
1059	>MT358637.1_530	AGUAGCAGUGACAAUAUUGCUUUGCUUGUACAGUAAGUGACAACAGAUGUUUCAUCUCGUUGACUUUCAGGUUACUAUAGCAGAGAUAUUACU	27155-27247	-20.5	>MT358637.1_530	UGCUUGUACAGUAAGUGACAAC	UGACUUUCAGGUUACUAUAGCA	Yes	Yes
1061	>MT358637.1_531	GGUUACUAUAGCAGAGAUAUUACUAAUUAUUAUGAGGACUUUUAAAGUUUCCAUUUGGAAUCUUGAUUACAUCAUAAACCUCAUAAUUAAAAAUUUAUCUAAGUCACUAACU	27224-27335	-25.6	>MT358637.1_531	AGAGAUAUUACUAAUUAUUAUGA	AACCUCAUAAUUAAAAAUUUAU	Yes	Yes
1063	>MT358637.1_532	GAUGAAGAGCAACCAAUGGAGAUUGAUUAAACGAACAUGAAAAUUAUUCUUUUCUUGGCACUGAUAACACUCGCUACUUGUGAGCUUUAUC	27357-27447	-20.8	>MT358637.1_532	Multibranch-No prediction	Multibranch-No prediction	No	No
1065	>MT358637.1_533	UUCUUUUCUUGGCACUGAUAACACUCGCUACUUGUGAGCUUUAUCACUACCAAGAGUGUGUUAGAG	27403-27468	-26.2	>MT358637.1_533	UCUUUUCUUGGCACUGAUAACACU	CUUUAUCACUACCAAGAGUGUGU	Yes	Yes
1067	>MT358637.1_534	UUCUUUUCUUGGCACUGAUAACACUCGCUACUUGUGAGCUUUAUCACUACCAAGAGUGUGUUAGAGGUACAACAGUACUUUUAAAAGAA	27403-27491	-21.8	>MT358637.1_534	Multibranch-No prediction	Multibranch-No prediction	No	No
1069	>MT358637.1_535	GUGAGCUUUAUCACUACCAAGAGUGUGUUAGAGGUACAACAGUACUUUUAAAAGAACCUUGCUCUUCUGGAACAUACGAGGGCAAUUCAC	27436-27525	-20.1	>MT358637.1_535	UCACUACCAAGAGUGUGUUAGA	UAAAAGAACCUUGCUCUUCUGG	Yes	Yes
1071	>MT358637.1_536	GUGUGUUAGAGGUACAACAGUACUUUUAAAAGAACCUUGCUCUUCUGGAACAUACGAGGGCAAUUCACCAUUUCAUCCUCUAGCUGAU	27458-27545	-21.7	>MT358637.1_536	Multibranch-No prediction	Multibranch-No prediction	No	No
1073	>MT358637.1_537	GUGUUAGAGGUACAACAGUACUUUUAAAAGAACCUUGCUCUUCUGGAACAUACGAGGGCAAUUCACCAUUUCAUCCUCUAGCUGAUAACAAAUUUGCACUGACUUGCUUUAGCAC	27460-27574	-29.3	>MT358637.1_537	Multibranch-No prediction	Multibranch-No prediction	No	No
1077	>MT358637.1_539	CUCAAUUUGCUUUUGCUUGUCCUGACGGCGUAAAACACGUCUAUCAGUUACGUGCCAGAUCAGUUUCACCUAAACUGUUCAUCAGACAAGAGGAAGUUCAAG	27574-27675	-24.4	>MT358637.1_539	Multibranch-No prediction	Multibranch-No prediction	No	No
1079	>MT358637.1_540	GGAAGUUCAAGAACUUUACUCUCCAAUUUUUCUUAUUGUUGCGGCAAUAGUGUUUAUAACACUUUGCUUCACACUCAAAAGAAAGACAGAAUGAUUGAACUUUC	27665-27768	-35	>MT358637.1_540	UUUUUCUUAUUGUUGCGGCAAUA	UUUGCUUCACACUCAAAAGAAA	Yes	Yes
1083	>MT358637.1_542	UUUUAGCCUUUCUGCUAUUCCUUGUUUUAAUUAUGCUUAUUAUCUUUUGGUUCUCACUUGAACUGCAAGAUCAUAAUGAAACUUGUCACGCCUAAACGAACAUGAAA	27792-27898	-21.6	>MT358637.1_542	Multibranch-No prediction	Multibranch-No prediction	No	No
1085	>MT358637.1_543	UGGUUCUCACUUGAACUGCAAGAUCAUAAUGAAACUUGUCACGCCUAAACGAACAUGAAAUUUCUUGUUUUCUUAGGAAUCA	27839-27920	-20	>MT358637.1_543	Multibranch-No prediction	Multibranch-No prediction	No	No
1087	>MT358637.1_544	AGGAAUCAUCACAACUGUAGCUGCAUUUCACCAAGAAUGUAGUUUACAGUCAUGUACUCAACAUCAACCAUAUGUAGUUGAUGACCCGUGUCCU	27913-28006	-25.7	>MT358637.1_544	Multibranch-No prediction	Multibranch-No prediction	No	No
1089	>MT358637.1_545	UCAACCAUAUGUAGUUGAUGACCCGUGUCCUAUUCACUUCUAUUCUAAAUGGUAUAUUAGAGUAGGAGCUAGAAAAUCAGCACCUUUAAUUGAAUUGUGCGUGGAUGA	27976-28083	-33.3	>MT358637.1_545	CCCGUGUCCUAUUCACUUCUAUU	UAGGAGCUAGAAAAUCAGCAC	Yes	Yes
1091	>MT358637.1_546	GUAGGAGCUAGAAAAUCAGCACCUUUAAUUGAAUUGUGCGUGGAUGAGGCUGGUUCUAAAUCACCCAUUCAGUACAUCGAUAUCGGUAAUUAUACAGUUUCCUGUUUACCUUUUAC	28037-28152	-24.6	>MT358637.1_546	Multibranch-No prediction	Multibranch-No prediction	No	No
1093	>MT358637.1_547	AAUCACCCAUUCAGUACAUCGAUAUCGGUAAUUAUACAGUUUCCUGUUUACCUUUUACAAUUAAUUGCCAGGAACCUAAAUUGGGUAGUCUUGUAGUGCGUUGUUCGUU	28095-28203	-23.6	>MT358637.1_547	Multibranch-No prediction	Multibranch-No prediction	No	No
1095	>MT358637.1_548	GUUUACCUUUUACAAUUAAUUGCCAGGAACCUAAAUUGGGUAGUCUUGUAGUGCGUUGUUCGUUCUAUGAAGACUUUUUAGAGUAUCAUGACGUUCGUGUUGUUUUAGAU	28140-28249	-24.7	>MT358637.1_548	Multibranch-No prediction	Multibranch-No prediction	No	No
1097	>MT358637.1_549	GUCUUGUAGUGCGUUGUUCGUUCUAUGAAGACUUUUUAGAGUAUCAUGACGUUCGUGUUGUUUUAGAUUUCAUCUAAACGAACAAACUAAAAUGUCUGAUAAUGGAC	28182-28288	-25.8	>MT358637.1_549	Multibranch-No prediction	Multibranch-No prediction	No	No
1099	>MT358637.1_550	UGCGUUGUUCGUUCUAUGAAGACUUUUUAGAGUAUCAUGACGUUCGUGUUGUUUUAGAUUUCAUCUAAACGAACAAACUAAAAUGUCUGAUAAUGGACCCCA	28191-28292	-23.2	>MT358637.1_550	Multibranch-No prediction	Multibranch-No prediction	No	No
1101	>MT358637.1_551	UGGUGGACCCUCAGAUUCAACUGGCAGUAACCAGAAUGGAGAACGCAGUGGGGCGCGAUCAAAACAACGUCGACCCCAAGGUUUACCCAAUAAUACUGCGUCUUGGUUCACCG	28323-28435	-46.1	>MT358637.1_551	AUGGAGAACGCAGUGGGGCGCG	CGACCCCAAGGUUUACCCAAU	Yes	Yes
1103	>MT358637.1_552	UUGGUUCACCGCUCUCACUCAACAUGGCAAGGAAGACCUUAAAUUCCCUCGAGGACAAGGCGUUCCAAUUAACACCAAUAGCAGUCCAGAUGACCAA	28425-28521	-28.6	>MT358637.1_552	AACAUGGCAAGGAAGACCUUAAA	CAAGGCGUUCCAAUUAACACCA	Yes	Yes
1105	>MT358637.1_553	GAAGAGCUACCAGACGAAUUCGUGGUGGUGACGGUAAAAUGAAAGAUCUCAGUCCAAGAUGGUAUUUCUACUACCUAGGAACUGGGCCAGAAGCUGGACUUC	28535-28636	-28.3	>MT358637.1_553	Multibranch-No prediction	Multibranch-No prediction	No	No
1107	>MT358637.1_554	GGGCCAGAAGCUGGACUUCCCUAUGGUGCUAACAAAGACGGCAUCAUAUGGGUUGCAACUGAGGGAGCCU	28618-28687	-20.7	>MT358637.1_554	AGCUGGACUUCCCUAUGGUGCU	CAUCAUAUGGGUUGCAACUGA	Yes	Yes
1109	>MT358637.1_555	GCCAGAAGCUGGACUUCCCUAUGGUGCUAACAAAGACGGCAUCAUAUGGGUUGCAACUGAGGGAGCCUUGAAUACACCAAAAGAUCACAUUGGC	28620-28713	-27.8	>MT358637.1_555	Multibranch-No prediction	Multibranch-No prediction	No	No
1113	>MT358637.1_557	GAACAACAUUGCCAAAAGGCUUCUACGCAGAAGGGAGCAGAGGCGGCAGUCAAGCCUCUUCUCGUUCCUCAUCACGUAGUCGCAACAGUUC	28763-28853	-30.8	>MT358637.1_557	UCUACGCAGAAGGGAGCAGAGG	UUCUCGUUCCUCAUCACGUAG	Yes	Yes
1117	>MT358637.1_559	GGCAGCAGUAGGGGAACUUCUCCUGCUAGAAUGGCUGGCAAUGGCGGUGAUGCUGCU	28870-28926	-25.1	>MT358637.1_559	Multibranch-No prediction	Multibranch-No prediction	No	No
1119	>MT358637.1_560	UGGCUGGCAAUGGCGGUGAUGCUGCUCUUGCUUUGCUGCUGCUUGACAGAUUGAACCAGCUUGAGAGCAAAAUGUCUGGUAAAGGCCAACAACAACAAGGCCA	28901-29003	-30.7	>MT358637.1_560	Multibranch-No prediction	Multibranch-No prediction	No	No
1121	>MT358637.1_561	AGCUUGAGAGCAAAAUGUCUGGUAAAGGCCAACAACAACAAGGCCAAACUGUCACUAAGAAAUCUGCUGCUGAGGCU	28958-29034	-23.9	>MT358637.1_561	AGAGCAAAAUGUCUGGUAAAGG	UGUCACUAAGAAAUCUGCUGCUGA	Yes	Yes
1123	>MT358637.1_562	CCAGGAACUAAUCAGACAAGGAACUGAUUACAAACAUUGGCCGCAAAUUGCACAAUUUGCCCCCAGCGCUUCAGCGUUCUUCGGAAUGUCGCGCAUUGGCAUGG	29136-29239	-27.7	>MT358637.1_562	Multibranch-No prediction	Multibranch-No prediction	No	No
1125	>MT358637.1_563	CAAUUUGCCCCCAGCGCUUCAGCGUUCUUCGGAAUGUCGCGCAUUGGCAUGGAAGUCACACCUUCGGGAACGUGGUUGACCUACACAGGUGCCAUCAAAUUG	29188-29289	-25.5	>MT358637.1_563	Multibranch-No prediction	Multibranch-No prediction	No	No
1127	>MT358637.1_564	UGUCGCGCAUUGGCAUGGAAGUCACACCUUCGGGAACGUGGUUGACCUACACAGGUGCCAUCAAAUUGGAUGACA	29222-29296	-22.8	>MT358637.1_564	AUUGGCAUGGAAGUCACACC	UUGACCUACACAGGUGCCAUCA	Yes	Yes
1131	>MT358637.1_566	UGAUGAAACUCAAGCCUUACCGCAGAGACAGAAGAAACAGCAAACUGUGAUUCUUCUUCCUGCUGCAGAUUUGGAUGAUUUCUCCA	29400-29485	-23.2	>MT358637.1_566	UACCGCAGAGACAGAAGAAAC	UGAUUCUUCUUCCUGCUGCAG	Yes	Yes
1137	>MT358637.1_569	GCCUAAACUCAUGCAGACCACACAAGGCAGAUGGGCUAUAUAAACGUUUUCGCUUUUCCGUUUACGAUAUAUAGUCUACUCUUGUGCAGAAUGAAUUCUCGU	29527-29628	-33	>MT358637.1_569	CAGACCACACAAGGCAGAUGGG	UAUAGUCUACUCUUGUGCAGAA	Yes	Yes
1143	>MT358637.1_572	UAGGGAGGACUUGAAAGAGCCACCACAUUUUCACCGAGGCCACGCGGAGUACGAUCGAGUGUACAGUGAACAAUGCUAGGGAGAGCUGCCUA	29698-29789	-22.9	>MT358637.1_572	AGCCACCACAUUUUCACCGAGG	AUCGAGUGUACAGUGAACAAUG	Yes	Yes
1147	>MT358637.1_574	CUAGGGAGAGCUGCCUAUAUGGAAGAGCCCUAAUGUGUAAAAUUAAUUUUAGUAGUGCUAUCCCCAUGUGAUUUUAAUAGCUUCUUAG	29773-29860	-21.4	>MT358637.1_574	UAUAUGGAAGAGCCCUAAUGUG	UAGUAGUGCUAUCCCCAUGUG	Yes	Yes

## Sheet: Putative Pre-miRNA
			mirEval		Sequence-Structure Motif Base Webserver
S.N.	Sequence ID	Sequence	Sequence ID		Sequence ID	Prediction	MFE	Result	Putative Pre-miRNA
1	>MT358637.1_1	UGUUCUCUAAACGAACUUUAAAAUCUGUGUGGCUGUCACUCGGCUGCAUGCUUAGUGCACUCACGCAGUAUAAUUAAUAACUAAUUACUGUCGUUGACAGGACA	No mir-like hairpin predictions		No mir-like hairpin predictions				No
2	>MT358637.1_2	UCUGUUCUCUAAACGAACUUUAAAAUCUGUGUGGCUGUCACUCGGCUGCAUGCUUAGUGCACUCACGCAGUAUAAUUAAUAACUAAUUACUGUCGUUGACAGG	No mir-like hairpin predictions		No mir-like hairpin predictions				No
3	>MT358637.1_6	UGUUGCAGCCGAUCAUCAGCACAUCUAGGUUUUGUCCGGGUGUGACCGAAAGGUAAGAUGGAGAGCCUUGUCCCUGGUUUCAACG	No mir-like hairpin predictions		No mir-like hairpin predictions				No
4	>MT358637.1_8	AUGGAGAGCCUUGUCCCUGGUUUCAACGAGAAAACACACGUCCAACUCAGUUUGCCUGUUUUACAGGUUCGCGACGUGCUCGUACGUGGCUUUGGAGACUCCGU	Result of MT358637.1_8	-20.4	No mir-like hairpin predictions				Yes
5	>MT358637.1_9	CUGUUUUACAGGUUCGCGACGUGCUCGUACGUGGCUUUGGAGACUCCGUGGAGGAGGUCUUAUCAGAGGCACGUCAACAUCUUAAAGAUGGCACUUGUGGCUUAG	No mir-like hairpin predictions		No mir-like hairpin predictions				No
6	>MT358637.1_12	GUUUUGCCUCAACUUGAACAGCCCUAUGUGUUCAUCAAACGUUCGGAUGCUCGAACUGCACCUCAUGGUCAUGUUAUGGUUGAGCUGGUAGCAGAAC	Result of MT358637.1_12	-21.9	No mir-like hairpin predictions				Yes
7	>MT358637.1_13	UGUGUUCAUCAAACGUUCGGAUGCUCGAACUGCACCUCAUGGUCAUGUUAUGGUUGAGCUGGUAGCAGAACUCGAAGGCAUUCAGUACGGUCGUAGUGGUGAGACA	Result of MT358637.1_13	-22	No mir-like hairpin predictions				Yes
8	>MT358637.1_14	GCACCUCAUGGUCAUGUUAUGGUUGAGCUGGUAGCAGAACUCGAAGGCAUUCAGUACGGUCGUAGUGGUGAGACACUUGGUGU	Result of MT358637.1_14	-19.7	No mir-like hairpin predictions				No
9	>MT358637.1_16	UCUUCGUAAGAACGGUAAUAAAGGAGCUGGUGGCCAUAGUUACGGCGCCGAUCUAAAGUCAUUUGACUUAGGCGACGAGCUUGGCACUGAUCCUUAUGAAGA	Result of MT358637.1_16	-27.1	No mir-like hairpin predictions				Yes
10	>MT358637.1_18	ACAUAGCAGUGGUGUUACCCGUGAACUCAUGCGUGAGCUUAACGGAGGGGCAUACACUCGCUAUGU	Result of MT358637.1_18	-26.1	>MT358637.1_Seq_18	CAUAGCAGUGGUGUUACCCGUGAACUCAUGCGUGAGCUUAACGGAGGGGCAUACACUCGCUAUGU			Yes
11	>MT358637.1_25	AGAAUUCGAUCUGUCUAUCCAGUUGCGUCACCAAAUGAAUGCAACCAAAUGUGCCUUUCAACUCUCAUGAAGUGUGAUCAUUGUGGUGAAACUUCAUGGCAGACGGGCGAUUUU	Result of MT358637.1_25	-19	No mir-like hairpin predictions				No
12	>MT358637.1_26	CAAAUGAAUGCAACCAAAUGUGCCUUUCAACUCUCAUGAAGUGUGAUCAUUGUGGUGAAACUUCAUGGCAGACGGGCGAUUUUGUUAAAGCCACUUGCGAAUUUUG	Result of MT358637.1_26	-21.5	No mir-like hairpin predictions				Yes
13	>MT358637.1_27	UGGCAGACGGGCGAUUUUGUUAAAGCCACUUGCGAAUUUUGUGGCACUGAGAAUUUGACUAAAGAAGGUGCCACUACUUGUGGUUACUUACCCCAAAAUGCUGUUGUUA	No mir-like hairpin predictions		No mir-like hairpin predictions				No
14	>MT358637.1_29	AAUACCAUAAUGAAUCUGGCUUGAAAACCAUUCUUCGUAAGGGUGGUCGCACUAUUGCCUUUGGAGGCUGUGUGUUCUCUUAUGUUGGUUGCCAUAACAAGUGUGCCUAUU	Result of MT358637.1_29	-24.2	No mir-like hairpin predictions				Yes
15	>MT358637.1_30	GCCUUUGGAGGCUGUGUGUUCUCUUAUGUUGGUUGCCAUAACAAGUGUGCCUAUUGGGUUCCACGUGCUAGCGCUAACAUAGGUUGUAACCAUACAGGUGUUGUUGGAGAAGGUUCCGAAGGU	Result of MT358637.1_30	-23.1	>MT358637.1_Seq_30	CUUUGGAGGCUGUGUGUUCUCUUAUGUUGGUUGCCAUAACAAGUGUGCCUAUUGGGUUCCACGUGCUAGCGCUAACAUAGGUUGUAACCAUACAGGUGUUGUU			Yes
16	>MT358637.1_31	GGUUGCCAUAACAAGUGUGCCUAUUGGGUUCCACGUGCUAGCGCUAACAUAGGUUGUAACCAUACAGGUGUUGUUGGAGAAGGUUCCGAAGGUCUUAAUGACAACC	Result of MT358637.1_31	-20.2	No mir-like hairpin predictions				Yes
17	>MT358637.1_37	AAAGGUGCCUGGAAUAUUGGUGAACAGAAAUCAAUACUGAGUCCUCUUUAUGCAUUUGCAUCAGAGGCUGCUCGUGUUGUACGAUCAAUUUUCUCCCGCACUCUU	Result of MT358637.1_37	-24.5	>MT358637.1_Seq_37	CCUGGAAUAUUGGUGAACAGAAAUCAAUACUGAGUCCUCUUUAUGCAUUUGCAUCAGAGGCUGCUCGUGUUGUACGAUCAAUUUUCUCCCGCACUCUU			Yes
18	>MT358637.1_39	AUCAAUUUUCUCCCGCACUCUUGAAACUGCUCAAAAUUCUGUGCGUGUUUUACAGAAGGCCGCUAUAACAAUACUAGAUGGAAUUUCACAGUAUUCACUGAGACUCAUUGAU	No mir-like hairpin predictions		No mir-like hairpin predictions				No
19	>MT358637.1_43	UGCUAUGAUGUUCACAUCUGAUUUGGCUACUAACAAUCUAGUUGUAAUGGCCUACAUUACAGGUGGUGUUGUUCAGUUGACUUCGCAGUGGCUAACUAACAUCUUUGGCA	Result of MT358637.1_43	-24.8	>MT358637.1_Seq_43	GUUCACAUCUGAUUUGGCUACUAACAAUCUAGUUGUAAUGGCCUACAUUACAGGUGGUGUUGUUCAGUUGACUUCGCAGUGGCUAACUAACAUCUUUGGCA			Yes
20	>MT358637.1_45	GGCCUACAUUACAGGUGGUGUUGUUCAGUUGACUUCGCAGUGGCUAACUAACAUCUUUGGCACUGUUUAUGAAAAACUCAAACCCGUCCUUGAUUGGCU	Result of MT358637.1_45	-17.2	>MT358637.1_Seq_46	UCUUUGGCACUGUUUAUGAAAAACUCAAACCCGUCCUUGAUUGGCUUGAAGAGAAGUUUAAGGAAGGUGUAGAGUUUCUUAGAGACGGUUGGGAAAUUG			No
21	>MT358637.1_46	UAACAUCUUUGGCACUGUUUAUGAAAAACUCAAACCCGUCCUUGAUUGGCUUGAAGAGAAGUUUAAGGAAGGUGUAGAGUUUCUUAGAGACGGUUGGGAAAUUGUUA	Result of MT358637.1_46	-26.2	No mir-like hairpin predictions				Yes
22	>MT358637.1_51	UUGUACAGAAAGUGUGUUAAAUCCAGAGAAGAAACUGGCCUACUCAUGCCUCUAAAAGCCCCAAAAGAAAUUAUCUUCUUAGAGGGAGAAACACUUCCCACAG	No mir-like hairpin predictions		No mir-like hairpin predictions				No
23	>MT358637.1_56	UGAUGGUAACAAACAAUACCUUCACACUCAAAGGCGGUGCACCAACAAAGGUUACUUUUGGUGAUGACACUGUGAUAGAAGUGCAAGGUUACAAGAGUGUGAAUAUCA	Result of MT358637.1_56	-22.5	No mir-like hairpin predictions				Yes
24	>MT358637.1_58	UUGAUAAAGUACUUAAUGAGAAGUGCUCUGCCUAUACAGUUGAACUCGGUACAGAAGUAAAUGAGUUCGCCUGUGUUGUGGCAGAUGCUGUCAUAAAAACUUUGCAA	Result of MT358637.1_58	-32.7	>MT358637.1_Seq_58	AAGUACUUAAUGAGAAGUGCUCUGCCUAUACAGUUGAACUCGGUACAGAAGUAAAUGAGUUCGCCUGUGUUGUGGCAGAUGCUGUCAUAAAAACUUUGCAA			Yes
25	>MT358637.1_60	AAUUACUUACACCACUGGGCAUUGAUUUAGAUGAGUGGAGUAUGGCUACAUACUACUUAUUUGAUGAGUCUGGUGAGUUUAAAUU	Result of MT358637.1_60	-24.1	>MT358637.1_Seq_60	ACUUACACCACUGGGCAUUGAUUUAGAUGAGUGGAGUAUGGCUACAUACUACUUAUUUGAUGAGUCUGGUGAGUUUAAAUU			Yes
26	>MT358637.1_62	UUGAUGAGUCUGGUGAGUUUAAAUUGGCUUCACAUAUGUAUUGUUCUUUUUACCCUCCAGAUGAGGAUGAAGAAGAAGGUGAUUGUGAAGAAGAAGAGUUUGAGCCAUCAA	No mir-like hairpin predictions		>MT358637.1_Seq_62	UCUGGUGAGUUUAAAUUGGCUUCACAUAUGUAUUGUUCUUUUUACCCUCCAGAUGAGGAUGAAGAAGAAGGUGAUUGUGAAGAAGAAGAGUUUGAGCCAUCAA			Yes
27	>MT358637.1_65	AGCAAGAAGAAGAUUGGUUAGAUGAUGAUAGUCAACAAACUGUUGGUCAACAAGACGGCAGUGAGGACAAUCAGACAACUACUAUUCAAACAAUUGUU	Result of MT358637.1_65	-20.2	No mir-like hairpin predictions				Yes
28	>MT358637.1_70	ACAAUGCCAUGCAAGUUGAAUCUGAUGAUUACAUAGCUACUAAUGGACCACUUAAAGUGGGUGGUAGUUGUGUUUUAAGCGGACACAAUCUUGCUAAACACUGU	Result of MT358637.1_70	-29.8	>MT358637.1_Seq_70	ACAAUGCCAUGCAAGUUGAAUCUGAUGAUUACAUAGCUACUAAUGGACCACUUAAAGUGGGUGGUAGUUGUGUUUUAAGCGGACACAAUCUUGCUAAACACUGU			Yes
29	>MT358637.1_73	UUAUUAUCAGCUGGUAUUUUUGGUGCUGACCCUAUACAUUCUUUAAGAGUUUGUGUAGAUACUGUUCGCACAAAUGUCUACUUAGCUGUCUUUGAUAA	No mir-like hairpin predictions		>MT358637.1_Seq_73	UUAUUAUCAGCUGGUAUUUUUGGUGCUGACCCUAUACAUUCUUUAAGAGUUUGUGUAGAUACUGUUCGCACAAAUGUCUACUUAGCUGUCUUUGAUA			Yes
30	>MT358637.1_74	CUUAGCUGUCUUUGAUAAAAAUCUCUAUGACAAACUUGUUUCAAGCUUUUUGGAAAUGAAGAGUGAAAAGCAAGUUGAACAAAAGAUCGCUGAGAUUCCUAAAGAGGAAGUUAAG	No mir-like hairpin predictions		>MT358637.1_Seq_74	GUCUUUGAUAAAAAUCUCUAUGACAAACUUGUUUCAAGCUUUUUGGAAAUGAAGAGUGAAAAGCAAGUUGAACAAAAGAUCGCUGAGAUUCCUAAAGAGGAAGU			Yes
31	>MT358637.1_75	UGAAAAGCAAGUUGAACAAAAGAUCGCUGAGAUUCCUAAAGAGGAAGUUAAGCCAUUUAUAACUGAAAGUAAACCUUCA	No mir-like hairpin predictions		No mir-like hairpin predictions				No
32	>MT358637.1_76	GAUGAUAAGAAAAUCAAAGCUUGUGUUGAAGAAGUUACAACAACUCUGGAAGAAACUAAGUUCCUCACAGAAAACUUGUUACUUUAUAUUGACAUUAAUGGCAAUCUUCAUC	No mir-like hairpin predictions		No mir-like hairpin predictions				No
33	>MT358637.1_80	GCCACUCUUGUUAGUGACAUUGACAUCACUUUCUUAAAGAAAGAUGCUCCAUAUAUAGUGGGUGAUGUUGUUCAAGAGGGUGUUUUAACUGCUGUGGU	Result of MT358637.1_80	-16	No mir-like hairpin predictions				No
34	>MT358637.1_81	AGAUGCUCCAUAUAUAGUGGGUGAUGUUGUUCAAGAGGGUGUUUUAACUGCUGUGGUUAUACCUACUAAAAAGGCUGGUGGCACUACU	Result of MT358637.1_81	-18.2	No mir-like hairpin predictions				No
35	>MT358637.1_82	UAACUGCUGUGGUUAUACCUACUAAAAAGGCUGGUGGCACUACUGAAAUGCUAGCGAAAGCUUUGAGAAAAGUGCCAACAGACAAUUAUAUAACCACUUA	No mir-like hairpin predictions		No mir-like hairpin predictions				No
36	>MT358637.1_84	GGGUUUAAAUGGUUACACUGUAGAGGAGGCAAAGACAGUGCUUAAAAAGUGUAAAAGUGCCUUUUACAUUCUACCAUCUAUUAUCU	Result of MT358637.1_84	-18.1	No mir-like hairpin predictions				No
37	>MT358637.1_89	GUGUGGAAACUAAAGCCAUAGUUUCAACUAUACAGCGUAAAUAUAAGGGUAUUAAAAUACAAGAGGGUGUGGUUGAUUAUGGUGCUAGAUUUUACUUUUACAC	No mir-like hairpin predictions		>MT358637.1_Seq_89	GUGUGGAAACUAAAGCCAUAGUUUCAACUAUACAGCGUAAAUAUAAGGGUAUUAAAAUACAAGAGGGUGUGGUUGAUUAUGGUGCUAGAUUUUACUUUU			Yes
38	>MT358637.1_92	GCUAUGUAACACAUGGCUUAAAUUUGGAAGAAGCUGCUCGGUAUAUGAGAUCUCUCAAAGUGCCAGCUACAGUUUCUGUUUCUUCACCUGAUGCUGUUACAGCGU	Result of MT358637.1_92	-20.5	No mir-like hairpin predictions				Yes
39	>MT358637.1_94	CAGCGUAUAAUGGUUAUCUUACUUCUUCUUCUAAAACACCUGAAGAACAUUUUAUUGAAACCAUCUCACUUGCUG	No mir-like hairpin predictions		No mir-like hairpin predictions				No
40	>MT358637.1_95	ACAUUUUAUUGAAACCAUCUCACUUGCUGGUUCCUAUAAAGAUUGGUCCUAUUCUGGACAAUCUACACAACUAGGUAUAGAAUUUCUUAAGAGAGGUGAUAAAAGUGU	No mir-like hairpin predictions		No mir-like hairpin predictions				No
41	>MT358637.1_96	CUAGGUAUAGAAUUUCUUAAGAGAGGUGAUAAAAGUGUAUAUUACACUAGUAAUCCUACCACAUUCCACCUAG	No mir-like hairpin predictions		No mir-like hairpin predictions				No
42	>MT358637.1_104	UAGUUUUCUGGGUAGGUACAUGUCAGCAUUAAAUCACACUAAAAAGUGGAAAUACCCACAAGUUAAUGGUUUAACUUCUAUUAAAUGGGCAGAUAACAACUG	No mir-like hairpin predictions		No mir-like hairpin predictions				No
43	>MT358637.1_108	UUAAUCCACCUGCUCUACAAGAUGCUUAUUACAGAGCAAGGGCUGGUGAAGCUGCUAACUUUUGUGCACUUAUCUUAGCCUACUGUAAUAAGACAGUAGGUGAGUUAG	Result of MT358637.1_108	-23.7	>MT358637.1_Seq_108	UGCUCUACAAGAUGCUUAUUACAGAGCAAGGGCUGGUGAAGCUGCUAACUUUUGUGCACUUAUCUUAGCCUACUGUAAUAAGACAGUAGGUGAGUUAG			Yes
44	>MT358637.1_109	GGCUGGUGAAGCUGCUAACUUUUGUGCACUUAUCUUAGCCUACUGUAAUAAGACAGUAGGUGAGUUAGGUGAUGUUAGAGAAACAAUGAGUUACUUGUUUCAACAUGCC	Result of MT358637.1_109	-27.6	>MT358637.1_Seq_109	UGGUGAAGCUGCUAACUUUUGUGCACUUAUCUUAGCCUACUGUAAUAAGACAGUAGGUGAGUUAGGUGAUGUUAGAGAAACAAUGAGUUACUUGUUUCAACAU			Yes
45	>MT358637.1_110	GGUGAUGUUAGAGAAACAAUGAGUUACUUGUUUCAACAUGCCAAUUUAGAUUCUUGCAAAAGAGUCUUGAACGUGGUGUGUAAAACUUGUGGACAACAGCAGACAACC	Result of MT358637.1_110	-22.1	No mir-like hairpin predictions				Yes
46	>MT358637.1_111	GGUGUGUAAAACUUGUGGACAACAGCAGACAACCCUUAAGGGUGUAGAAGCUGUUAUGUACAUGGGCACACU	Result of MT358637.1_111	-24.9	No mir-like hairpin predictions				Yes
47	>MT358637.1_112	GGGUGUAGAAGCUGUUAUGUACAUGGGCACACUUUCUUAUGAACAAUUUAAGAAAGGUGUUCAGAUACCUUGUACGUGUGGUAAACAAGCUACAAAAUAUCU	Result of MT358637.1_112	-24.6	>MT358637.1_Seq_112	GGGUGUAGAAGCUGUUAUGUACAUGGGCACACUUUCUUAUGAACAAUUUAAGAAAGGUGUUCAGAUACCUUGUACGUGUGGUAAACAA			Yes
48	>MT358637.1_119	GUCCUAUUACGGAUGUUUUCUACAAAGAAAACAGUUACACAACAACCAUAAAACCAGUUACUUAUAAAUUGGAUGGUGUUGUUUGUACAGAAAUUGACCCUAAGUUGGAC	No mir-like hairpin predictions		No mir-like hairpin predictions				No
49	>MT358637.1_121	UUGGAUGGUGUUGUUUGUACAGAAAUUGACCCUAAGUUGGACAAUUAUUAUAAGAAAGACAAUUCUUAUUUCACAGAGCAACCAAUUGAUCUUGUACCAAACCAACCAUAUCCAA	No mir-like hairpin predictions		No mir-like hairpin predictions				No
50	>MT358637.1_123	UUUAAGUUUGUAUGUGAUAAUAUCAAAUUUGCUGAUGAUUUAAACCAGUUAACUGGUUAUAAGAAACCUGCUUCAAGAGAGCUUAAAGUUACAUUUUUCCCUGACUUAAA	No mir-like hairpin predictions		No mir-like hairpin predictions				No
51	>MT358637.1_124	AGCUUAAAGUUACAUUUUUCCCUGACUUAAAUGGUGAUGUGGUGGCUAUUGAUUAUAAACACUACACACCCUCUUUUAAGAAAGGAGCUAAAUUGUUACAUAAACCU	Result of MT358637.1_124	-22.7	>MT358637.1_Seq_124	CUUAAAGUUACAUUUUUCCCUGACUUAAAUGGUGAUGUGGUGGCUAUUGAUUAUAAACACUACACACCCUCUUUUAAGAAAGGAGCUAAAUUGUUACAUAAAC			Yes
52	>MT358637.1_125	AUUGUUUGGCAUGUUAACAAUGCAACUAAUAAAGCCACGUAUAAACCAAAUACCUGGUGUAUACGUUGUCUUUGGAGCACAAAACCAGUUGAAACAUCAAAUUCGU	No mir-like hairpin predictions		No mir-like hairpin predictions				No
53	>MT358637.1_128	GUCUCUGAAGAAGUAGUGGAAAAUCCUACCAUACAGAAAGACGUUCUUGAGUGUAAUGUGAAGACUACCGAAGUUGUAGGAGAC	No mir-like hairpin predictions		No mir-like hairpin predictions				No
54	>MT358637.1_129	GACGUUCUUGAGUGUAAUGUGAAGACUACCGAAGUUGUAGGAGACAUUAUACUUAAACCAGCAAAUAAUAGUUUAAAAAUUACAGAAGAGGUU	No mir-like hairpin predictions		No mir-like hairpin predictions				No
55	>MT358637.1_130	GGUUGGCCACACAGAUCUAAUGGCUGCUUAUGUAGACAAUUCUAGUCUUACUAUUAAGAAACCUAAUGAAUUAUCUAGAGUAUUAGGUUUGAAAACCCUUGCUACUC	Result of MT358637.1_130	-17.8	No mir-like hairpin predictions				No
56	>MT358637.1_137	AAGUACAAAUUCUAGAAUUAAAGCAUCUAUGCCGACUACUAUAGCAAAGAAUACUGUUAAGAGUGUCGGUAAAUUUUGUCUAGAGGCUUCAUUU	No mir-like hairpin predictions		>MT358637.1_Seq_137	UACAAAUUCUAGAAUUAAAGCAUCUAUGCCGACUACUAUAGCAAAGAAUACUGUUAAGAGUGUCGGUAAAUUUUGUCUAGAGGCUUCAUUU			Yes
57	>MT358637.1_139	ACUAUUAAGUGUUUGCCUAGGUUCUUUAAUCUACUCAACCGCUGCUUUAGGUGUUUUAAUGUCUAAUUUAGGCAUGCCUUCUUACUGUACUGGU	No mir-like hairpin predictions		No mir-like hairpin predictions				No
58	>MT358637.1_143	AGAGAAGGCUAUUUGAACUCUACUAAUGUCACUAUUGCAACCUACUGUACUGGUUCUAUACCUUGUAGUGUUUGUCUUAGUGGUUUAGAUUCUUUAGACACCUAUCCUUCUUU	No mir-like hairpin predictions		No mir-like hairpin predictions				No
59	>MT358637.1_144	ACCUAUCCUUCUUUAGAAACUAUACAAAUUACCAUUUCAUCUUUUAAAUGGGAUUUAACUGCUUUUGGCUUAGUUGCAGAGUGGUUUUUGGCAUAUAUUCUUUUCACUAGGU	No mir-like hairpin predictions		No mir-like hairpin predictions				No
60	>MT358637.1_146	CAUAUAUUCUUUUCACUAGGUUUUUCUAUGUACUUGGAUUGGCUGCAAUCAUGCAAUUGUUUUUCAGCUAUUUUGCAGUACAUUUUAUUAGUAAUUCUUGGCUUAUGUG	No mir-like hairpin predictions		No mir-like hairpin predictions				No
61	>MT358637.1_147	GUACAUUUUAUUAGUAAUUCUUGGCUUAUGUGGUUAAUAAUUAAUCUUGUACAAAUGGCCCCGAUUUCAGCUAUGGUUAGAAUGUAC	Result of MT358637.1_147	-16	No mir-like hairpin predictions				No
62	>MT358637.1_148	UGGCCCCGAUUUCAGCUAUGGUUAGAAUGUACAUCUUCUUUGCAUCAUUUUAUUAUGUAUGGAAAAGUUAUGUGCAUGUUGUAGACGGUUGUAAUUCAUCA	No mir-like hairpin predictions		No mir-like hairpin predictions				No
63	>MT358637.1_149	UAUGGAAAAGUUAUGUGCAUGUUGUAGACGGUUGUAAUUCAUCAACUUGUAUGAUGUGUUACAAACGUAAUAGAGCAACAAGAGUCGAAUGUACAACUAUUGUUAAUG	Result of MT358637.1_149	-22.2	>MT358637.1_Seq_149	UAUGGAAAAGUUAUGUGCAUGUUGUAGACGGUUGUAAUUCAUCAACUUGUAUGAUGUGUUACAAACGUAAUAGAGCAACAAGAGUCGAAUGUACAACUAUU			Yes
64	>MT358637.1_150	GCAUGUUGUAGACGGUUGUAAUUCAUCAACUUGUAUGAUGUGUUACAAACGUAAUAGAGCAACAAGAGUCGAAUGUACAACUAUUGUUAAUGGUGU	Result of MT358637.1_150	-18.6	>MT358637.1_Seq_150	CAUGUUGUAGACGGUUGUAAUUCAUCAACUUGUAUGAUGUGUUACAAACGUAAUAGAGCAACAAGAGUCGAAUGUACAACUAUUGUUAAUGGUGU			No
65	>MT358637.1_152	GGUAAAGGCUUUUGCAAACUACACAAUUGGAAUUGUGUUAAUUGUGAUACAUUCUGUGCUGGUAGUACAUUUAUUAGUGAUGAAGUUGCGAGAGACUUGUCACU	No mir-like hairpin predictions		No mir-like hairpin predictions				No
66	>MT358637.1_153	CUGGUAGUACAUUUAUUAGUGAUGAAGUUGCGAGAGACUUGUCACUACAGUUUAAAAGACCAAUAAAUCCUACUGACCAGUCUUCUUACAUCGUUGAUAGUGUUACAG	Result of MT358637.1_153	-20	>MT358637.1_Seq_153	AGUACAUUUAUUAGUGAUGAAGUUGCGAGAGACUUGUCACUACAGUUUAAAAGACCAAUAAAUCCUACUGACCAGUCUUCUUACAUCGUUGAUAGUGUUACAG			Yes
67	>MT358637.1_154	AGUCUUCUUACAUCGUUGAUAGUGUUACAGUGAAGAAUGGUUCCAUCCAUCUUUACUUUGAUAAAGCUGGUCAAAAGACU	Result of MT358637.1_154	-22	No mir-like hairpin predictions				Yes
68	>MT358637.1_155	GUCUUCUUACAUCGUUGAUAGUGUUACAGUGAAGAAUGGUUCCAUCCAUCUUUACUUUGAUAAAGCUGGUCAAAAGACUUAUGAAAGAC	No mir-like hairpin predictions		>MT358637.1_Seq_155	GUCUUCUUACAUCGUUGAUAGUGUUACAGUGAAGAAUGGUUCCAUCCAUCUUUACUUUGAUAAAGCUGGUCAAAAGACUUAUGAAAGAC			Yes
69	>MT358637.1_160	AUUAGUGUCUGAUGUUGGUGAUAGUGCGGAAGUUGCAGUUAAAAUGUUUGAUGCUUACGUUAAUACGUUUUCAUCAACUUUUAACGUACCAAUGGAAAAACUCAAAACACUAGU	Result of MT358637.1_160	-17.9	No mir-like hairpin predictions				No
70	>MT358637.1_164	AAUGUCUUAAAUUGUCACAUCAAUCUGACAUAGAAGUUACUGGCGAUAGUUGUAAUAACUAUAUGCUCACCUAUAACAAAGUUGAAAACAUGACACCCCGUGACCUU	No mir-like hairpin predictions		No mir-like hairpin predictions				No
71	>MT358637.1_165	CUAUAACAAAGUUGAAAACAUGACACCCCGUGACCUUGGUGCUUGUAUUGACUGUAGUGCGCGUCAUAUUAAUGCGCAGGUAGCAAAAAGUCACAACAUUGCUUUGAUAUGG	No mir-like hairpin predictions		No mir-like hairpin predictions				No
72	>MT358637.1_168	UAACUUACCUUUUAAGUUGACAUGUGCAACUACUAGACAAGUUGUUAAUGUUGUAACAACAAAGAUAGCACUUAAGGGUGGUAAAAUUGUUAAUAAUUGGUUGAAGCAGUUA	Result of MT358637.1_168	-16.7	No mir-like hairpin predictions				No
73	>MT358637.1_169	GGGUGGUAAAAUUGUUAAUAAUUGGUUGAAGCAGUUAAUUAAAGUUACACUUGUGUUCCUUUUUGUUGCUGCUAUUUUCUAUUUAAUAACACCU	No mir-like hairpin predictions		No mir-like hairpin predictions				No
74	>MT358637.1_170	UGCUAUUUUCUAUUUAAUAACACCUGUUCAUGUCAUGUCUAAACAUACUGACUUUUCAAGUGAAAUCAUAGGAUACAAGGCUAUUGAUGGUGGUGUCACUCGUGACAUAGCA	No mir-like hairpin predictions		No mir-like hairpin predictions				No
75	>MT358637.1_175	GAUUGCUGCAGUCAUAACAAGAGAAGUGGGUUUUGUCGUGCCUGGUUUGCCUGGCACGAUAUUACGCACAACUAAUGGUGACUUUUUGCAUUUC	Result of MT358637.1_175	-35.3	No mir-like hairpin predictions				Yes
76	>MT358637.1_178	CUUAUAGAGUACACUGACUUUGCAACAUCAGCUUGUGUUUUGGCUGCUGAAUGUACAAUUUUUAAAGAUGCUUCUGGUAAG	Result of MT358637.1_178	-12.9	No mir-like hairpin predictions				No
77	>MT358637.1_179	GGCUGCUGAAUGUACAAUUUUUAAAGAUGCUUCUGGUAAGCCAGUACCAUAUUGUUAUGAUACCAAUGUACUAGAAGGUUCUGUUGCUUAUGAAAGUUUACGCCC	No mir-like hairpin predictions		No mir-like hairpin predictions				No
78	>MT358637.1_180	GUGUUUUGGCUGCUGAAUGUACAAUUUUUAAAGAUGCUUCUGGUAAGCCAGUACCAUAUUGUUAUGAUACCAAUGUACUAGAAGGUUCUGUUGCUUAUGAAAGUUUACGC	No mir-like hairpin predictions		No mir-like hairpin predictions				No
79	>MT358637.1_181	AAGGUUCUGUUGCUUAUGAAAGUUUACGCCCUGACACACGUUAUGUGCUCAUGGAUGGCUCUAUUAUUCAAUUUCCUAACACCUACCUU	No mir-like hairpin predictions		>MT358637.1_Seq_180	CUGAAUGUACAAUUUUUAAAGAUGCUUCUGGUAAGCCAGUACCAUAUUGUUAUGAUACCAAUGUACUAGAAGGUUCUGUUGCUUAUGAAAGUUUACGC			Yes
80	>MT358637.1_183	UGUGCUCAUGGAUGGCUCUAUUAUUCAAUUUCCUAACACCUACCUUGAAGGUUCUGUUAGAGUGGUAACAACUUUUGAUUCUGAGUACUGUAGGCACG	No mir-like hairpin predictions		No mir-like hairpin predictions				No
81	>MT358637.1_186	UAGUGGUAGAUGGGUACUUAACAAUGAUUAUUACAGAUCUUUACCAGGAGUUUUCUGUGGUGUAGAUGCUGUAAAUUUACUUACUAAUAUGUUUACACCACUA	Result of MT358637.1_186	-19.2	No mir-like hairpin predictions				No
82	>MT358637.1_187	UCUUUACCAGGAGUUUUCUGUGGUGUAGAUGCUGUAAAUUUACUUACUAAUAUGUUUACACCACUAAUUCAACCUAUUGGUGCUUUGGA	Result of MT358637.1_187	-20.3	No mir-like hairpin predictions				Yes
83	>MT358637.1_188	UUACCAGGAGUUUUCUGUGGUGUAGAUGCUGUAAAUUUACUUACUAAUAUGUUUACACCACUAAUUCAACCUAUUGGUGCUUUGGACAUAUCAGCAUCUAUAGUAGCUGGUGG	Result of MT358637.1_188	-25.5	No mir-like hairpin predictions				Yes
84	>MT358637.1_190	AACAUGCCUUGCCUACUAUUUUAUGAGGUUUAGAAGAGCUUUUGGUGAAUACAGUCAUGUAGUUGCCUUUAAUACUUUACUAUUCCUUAUGUCAUUCACUGUACUCUGUU	Result of MT358637.1_190	-19.2	No mir-like hairpin predictions				No
85	>MT358637.1_191	AUGAGGUUUAGAAGAGCUUUUGGUGAAUACAGUCAUGUAGUUGCCUUUAAUACUUUACUAUUCCUUAUGUCAUUCACUGUACUCUGUUUAACACCAGU	No mir-like hairpin predictions		No mir-like hairpin predictions				No
86	>MT358637.1_192	UGUCAUUCACUGUACUCUGUUUAACACCAGUUUACUCAUUCUUACCUGGUGUUUAUUCUGUUAUUUACUUGUACUUGACA	No mir-like hairpin predictions		No mir-like hairpin predictions				No
87	>MT358637.1_193	UACUAAUGAUGUUUCUUUUUUAGCACAUAUUCAGUGGAUGGUUAUGUUCACACCUUUAGUACCUUUCUGGAUAACAAUUGCUUAUAUCAUUUGUA	Result of MT358637.1_193	-14.7	No mir-like hairpin predictions				No
88	>MT358637.1_195	UUUGUUAAAUAAAGAAAUGUAUCUAAAGUUGCGUAGUGAUGUGCUAUUACCUCUUACGCAAUAUAAUAGAUACUUAGCUCUUUAUAAUAAGUACAAG	Result of MT358637.1_195	-22.3	>MT358637.1_Seq_195	UUUGUUAAAUAAAGAAAUGUAUCUAAAGUUGCGUAGUGAUGUGCUAUUACCUCUUACGCAAUAUAAUAGAUACUUAGCUCUUUAUAAUAAGUA			Yes
89	>MT358637.1_199	ACCACAAACCUCUAUCACCUCAGCUGUUUUGCAGAGUGGUUUUAGAAAAAUGGCAUUCCCAUCUGGUAAAGUUGAGGGUUGUAUGGUACAAGUAACUUGUGGU	Result of MT358637.1_199	-18.9	No mir-like hairpin predictions				No
90	>MT358637.1_201	CUCUGAAGACAUGCUUAACCCUAAUUAUGAAGAUUUACUCAUUCGUAAGUCUAAUCAUAAUUUCUUGGUACAGGCUGGUAAUGUUCAACUCAGGG	Result of MT358637.1_201	-24.7	>MT358637.1_Seq_201	CUCUGAAGACAUGCUUAACCCUAAUUAUGAAGAUUUACUCAUUCGUAAGUCUAAUCAUAAUUUCUUGGUACAGGCUGGUAAUGUUCAAC			Yes
91	>MT358637.1_203	UAAUUUCUUGGUACAGGCUGGUAAUGUUCAACUCAGGGUUAUUGGACAUUCUAUGCAAAAUUGUGUACUUAAGCUUAAGGUUG	No mir-like hairpin predictions		No mir-like hairpin predictions				No
92	>MT358637.1_204	UGGACAUUCUAUGCAAAAUUGUGUACUUAAGCUUAAGGUUGAUACAGCCAAUCCUAAGACACCUAAGUAUAAGUUUGUUCG	No mir-like hairpin predictions		No mir-like hairpin predictions				No
93	>MT358637.1_205	AGCCAAUCCUAAGACACCUAAGUAUAAGUUUGUUCGCAUUCAACCAGGACAGACUUUUUCAGUGUUAGCUUGUUACAAUGGUU	Result of MT358637.1_205	-15.7	No mir-like hairpin predictions				No
94	>MT358637.1_206	UCACCAUCUGGUGUUUACCAAUGUGCUAUGAGGCCCAAUUUCACUAUUAAGGGUUCAUUCCUUAAUGGUUCAUGUGGUAGUGUUGGUUUUAACAUAGAUUAUGA	Result of MT358637.1_206	-24.2	>MT358637.1_Seq_206	CCAUCUGGUGUUUACCAAUGUGCUAUGAGGCCCAAUUUCACUAUUAAGGGUUCAUUCCUUAAUGGUUCAUGUGGUAGUGUUGGUUUUAACAUAGAUUAUGA			Yes
95	>MT358637.1_207	GGUUCAUUCCUUAAUGGUUCAUGUGGUAGUGUUGGUUUUAACAUAGAUUAUGACUGUGUCUCUUUUUGUUACAUGCACCAUAUGGAAUUACCAACUGGAGUUCAUGCU	No mir-like hairpin predictions		>MT358637.1_Seq_207	GGUUCAUUCCUUAAUGGUUCAUGUGGUAGUGUUGGUUUUAACAUAGAUUAUGACUGUGUCUCUUUUUGUUACAUGCACCAUAUGGAAUUACCAAC			Yes
96	>MT358637.1_208	UUAUGACUGUGUCUCUUUUUGUUACAUGCACCAUAUGGAAUUACCAACUGGAGUUCAUGCUGGCACAGACUUAG	No mir-like hairpin predictions		No mir-like hairpin predictions				No
97	>MT358637.1_209	UGUCUCUUUUUGUUACAUGCACCAUAUGGAAUUACCAACUGGAGUUCAUGCUGGCACAGACUUAGAAGGUAACUUUUAUGGACCUUUUGUUGACAGGCA	No mir-like hairpin predictions		No mir-like hairpin predictions				No
98	>MT358637.1_210	GGACCUUUUGUUGACAGGCAAACAGCACAAGCAGCUGGUACGGACACAACUAUUACAGUUAAUGUUUUAGCUUGGUUGUACGCUGCUGUUAUAAAUGGAGACAGGUGGUUU	Result of MT358637.1_210	-21.1	No mir-like hairpin predictions				No
99	>MT358637.1_212	AUGAAGUACAAUUAUGAACCUCUAACACAAGACCAUGUUGACAUACUAGGACCUCUUUCUGCUCAAACUGGAAUUGCCGUUUUAGAUAUGUGUGCUUCAU	No mir-like hairpin predictions		No mir-like hairpin predictions				No
100	>MT358637.1_213	UUAGAUAUGUGUGCUUCAUUAAAAGAAUUACUGCAAAAUGGUAUGAAUGGACGUACCAUAUUGGGUAGUGCUUUAUUAGAAGAUGAAUUUACACCUUUUGA	Result of MT358637.1_213	-21.5	>MT358637.1_Seq_213	UUAGAUAUGUGUGCUUCAUUAAAAGAAUUACUGCAAAAUGGUAUGAAUGGACGUACCAUAUUGGGUAGUGCUUUAUUAGAAGAUGAAUUUACACCUU			Yes
101	>MT358637.1_214	GACAAUGCUCAGGUGUUACUUUCCAAAGUGCAGUGAAAAGAACAAUCAAGGGUACACACCACUGGUUGUUACUCACAAUUUUGACUUCACUUUUAGUUUUAGUC	Result of MT358637.1_214	-19.7	No mir-like hairpin predictions				No
102	>MT358637.1_215	GUGCAGUGAAAAGAACAAUCAAGGGUACACACCACUGGUUGUUACUCACAAUUUUGACUUCACUUUUAGUUUUAGUCCAGAGUACUCAAUGGUCUUUGUUCUUUUUUUUGUAU	Result of MT358637.1_215	-14.1	No mir-like hairpin predictions				No
103	>MT358637.1_217	GCUAUGUCUGCUUUUGCAAUGAUGUUUGUCAAACAUAAGCAUGCAUUUCUCUGUUUGUUUUUGUUACCUUCUCUUGCCACUGUAGCUUAUUUUAAUAUGGU	No mir-like hairpin predictions		No mir-like hairpin predictions				No
104	>MT358637.1_218	UGUUUGUCAAACAUAAGCAUGCAUUUCUCUGUUUGUUUUUGUUACCUUCUCUUGCCACUGUAGCUUAUUUUAAUAUGGUCUAUAUGCCUGCUAGUUGGGUGAUGCG	No mir-like hairpin predictions		No mir-like hairpin predictions				No
105	>MT358637.1_219	CUGCUAGUUGGGUGAUGCGUAUUAUGACAUGGUUGGAUAUGGUUGAUACUAGUUUGUCUGGUUUUAAGCUAAAAGACUGUGUUAUGUAUGCAUCAGCUGUAG	Result of MT358637.1_219	-32.2	>MT358637.1_Seq_219	UGGGUGAUGCGUAUUAUGACAUGGUUGGAUAUGGUUGAUACUAGUUUGUCUGGUUUUAAGCUAAAAGACUGUGUUAUGUAUGCAUCAGCUGUAG			Yes
106	>MT358637.1_221	GUCUGGUUUUAAGCUAAAAGACUGUGUUAUGUAUGCAUCAGCUGUAGUGUUACUAAUCCUUAUGACAGCAAGAACUGUGUAUGAUGAUGGUGCUAGGAGAGUGUGGAC	Result of MT358637.1_221	-13.2	No mir-like hairpin predictions				No
107	>MT358637.1_223	ACACUUAUGAAUGUCUUGACACUCGUUUAUAAAGUUUAUUAUGGUAAUGCUUUAGAUCAAGCCAUUUCCAUGUGGGCUCUUAUAAUCUCUGUUACUUCUAACUACUCAGGUGU	Result of MT358637.1_223	-17.4	No mir-like hairpin predictions				No
108	>MT358637.1_224	UCAAGCCAUUUCCAUGUGGGCUCUUAUAAUCUCUGUUACUUCUAACUACUCAGGUGUAGUUACAACUGUCAUGUUUUUGGCCAGAGGUAUUGUUUUUAUGUGUGUUGA	No mir-like hairpin predictions		No mir-like hairpin predictions				No
109	>MT358637.1_225	GCUCUUAUAAUCUCUGUUACUUCUAACUACUCAGGUGUAGUUACAACUGUCAUGUUUUUGGCCAGAGGUAUUGUUUUUAUGUGUGUUGAGU	No mir-like hairpin predictions		No mir-like hairpin predictions				No
110	>MT358637.1_226	UUAUGUGUGUUGAGUAUUGCCCUAUUUUCUUCAUAACUGGUAAUACACUUCAGUGUAUAAUGCUAGUUUAUUGUUUCUUAGGCUAUUUUUGUACUUGUUACUUUGG	No mir-like hairpin predictions		>MT358637.1_Seq_226	UUAUGUGUGUUGAGUAUUGCCCUAUUUUCUUCAUAACUGGUAAUACACUUCAGUGUAUAAUGCUAGUUUAUUGUUUCUUAGGCUAUUUUUGUACUUGUUACUU			Yes
111	>MT358637.1_227	ACACUUCAGUGUAUAAUGCUAGUUUAUUGUUUCUUAGGCUAUUUUUGUACUUGUUACUUUGGCCUCUUUUGUUUACUCAACCGCUACUUUAGACUGACUCUUGGUGU	No mir-like hairpin predictions		No mir-like hairpin predictions				No
112	>MT358637.1_229	AUUCACAGGGACUACUCCCACCCAAGAAUAGCAUAGAUGCCUUCAAACUCAACAUUAAAUUGUUGGGUGUUGGUGGCAAACCUUGUAUCAAAGUAGCCACUGUACAGU	No mir-like hairpin predictions		No mir-like hairpin predictions				No
113	>MT358637.1_232	AGAGUAGAAUCAUCAUCUAAAUUGUGGGCUCAAUGUGUCCAGUUACACAAUGACAUUCUCUUAGCUAAAGAUACUACUGAAGCCUUUGAAAAAAUGGUUUCACUACUUU	No mir-like hairpin predictions		No mir-like hairpin predictions				No
114	>MT358637.1_233	GUCCAGUUACACAAUGACAUUCUCUUAGCUAAAGAUACUACUGAAGCCUUUGAAAAAAUGGUUUCACUACUUUCUGUUUUGCUUUCCAUGCAGGGUGCUGUAGACAU	No mir-like hairpin predictions		No mir-like hairpin predictions				No
115	>MT358637.1_235	GCUUUCCAUGCAGGGUGCUGUAGACAUAAACAAGCUUUGUGAAGAAAUGCUGGACAACAGGGCAACCUUACAAGCUAUAGCCUCAGAGUUUAGU	No mir-like hairpin predictions		No mir-like hairpin predictions				No
116	>MT358637.1_236	AAGCUAUAGCCUCAGAGUUUAGUUCCCUUCCAUCAUAUGCAGCUUUUGCUACUGCUCAAGAAGCUUAUGAGCAGGCUGUUGCUAAUGGUGAUUCUGAAGUUGUUCUU	Result of MT358637.1_236	-22.1	No mir-like hairpin predictions				Yes
117	>MT358637.1_237	AGUCUUUGAAUGUGGCUAAAUCUGAAUUUGACCGUGAUGCAGCCAUGCAACGUAAGUUGGAAAAGAUGGCUGAUCAAGCUAUGACCCAAAUGUAUAAACAGGCU	No mir-like hairpin predictions		No mir-like hairpin predictions				No
118	>MT358637.1_238	UGUAUAAACAGGCUAGAUCUGAGGACAAGAGGGCAAAAGUUACUAGUGCUAUGCAGACAAUGCUUUUCACUAUGCUUAGAAAGUUGGAUAAUGAUGCA	No mir-like hairpin predictions		No mir-like hairpin predictions				No
119	>MT358637.1_243	CAUAUAAAAAUACGUGUGAUGGUACAACAUUUACUUAUGCAUCAGCAUUGUGGGAAAUCCAACAGGUUGUAGAUGCAGAUAGUAAAAUUGUUCAACUUAGUGAAAUUAGUAUG	Result of MT358637.1_243	-20.5	No mir-like hairpin predictions				Yes
120	>MT358637.1_245	AGCAUGGCCUCUUAUUGUAACAGCUUUAAGGGCCAAUUCUGCUGUCAAAUUACAGAAUAAUGAGCUUAGUCCUGUUGCACUACGACAGAUGUCUUGUGCU	No mir-like hairpin predictions		No mir-like hairpin predictions				No
121	>MT358637.1_247	UGCCGGUACUACACAAACUGCUUGCACUGAUGACAAUGCGUUAGCUUACUACAACACAACAAAGGGAGGUAGGUUUGUACUUGCA	No mir-like hairpin predictions		No mir-like hairpin predictions				No
122	>MT358637.1_248	CUACACAAACUGCUUGCACUGAUGACAAUGCGUUAGCUUACUACAACACAACAAAGGGAGGUAGGUUUGUACUUGCACUGUUAUCCGAUUUACAGGAUUUGAAAUGG	No mir-like hairpin predictions		No mir-like hairpin predictions				No
123	>MT358637.1_252	GUUUAGCUGCCACAGUACGUCUACAAGCUGGUAAUGCAACAGAAGUGCCUGCCAAUUCAACUGUAUUAUCUUUCUGUGCUUUUGCUGUAGAUGCUGCUAAAGCUUAC	No mir-like hairpin predictions		No mir-like hairpin predictions				No
124	>MT358637.1_253	UUGCUGUAGAUGCUGCUAAAGCUUACAAAGAUUAUCUAGCUAGUGGGGGACAACCAAUCACUAAUUGUGUUAAGAUGUUGUGUACACACACUGGUACUGGUCAGGCAA	No mir-like hairpin predictions		No mir-like hairpin predictions				No
125	>MT358637.1_254	GCUGCUAAAGCUUACAAAGAUUAUCUAGCUAGUGGGGGACAACCAAUCACUAAUUGUGUUAAGAUGUUGUGUACACACACUGGUACUGGUCAGGCAAUAACAGU	No mir-like hairpin predictions		No mir-like hairpin predictions				No
126	>MT358637.1_256	UGGUACUGGUCAGGCAAUAACAGUUACACCGGAAGCCAAUAUGGAUCAAGAAUCCUUUGGUGGUGCAUCGUGUUGUCUGUACUGCCGUUGCCACAUAGAUCAUCCA	Result of MT358637.1_256	-23.4	No mir-like hairpin predictions				Yes
127	>MT358637.1_257	GCAUCGUGUUGUCUGUACUGCCGUUGCCACAUAGAUCAUCCAAAUCCUAAAGGAUUUUGUGACUUAAAAGGUAAGUAUGUACAAAUACCUACAACUUGUGC	No mir-like hairpin predictions		No mir-like hairpin predictions				No
128	>MT358637.1_261	GGCUGUAGUUGUGAUCAACUCCGCGAACCCAUGCUUCAGUCAGCUGAUGCACAAUCGUUUUUAAACGGGUUUGCGGUGUAAGUGCAGCC	Result of MT358637.1_261	-34.6	No mir-like hairpin predictions				Yes
129	>MT358637.1_267	GGACGAAGAUGACAAUUUAAUUGAUUCUUACUUUGUAGUUAAGAGACACACUUUCUCUAACUACCAACAUGAAGAAACAAUUUAUAAUUUACUUAAGGAUUGUCC	No mir-like hairpin predictions		No mir-like hairpin predictions				No
130	>MT358637.1_268	UACCAACAUGAAGAAACAAUUUAUAAUUUACUUAAGGAUUGUCCAGCUGUUGCUAAACAUGACUUCUUUAAGUUUAGAAUAGACGGUGACAUGGUA	No mir-like hairpin predictions		No mir-like hairpin predictions				No
131	>MT358637.1_271	UGGUAUGAUUUUGUAGAAAACCCAGAUAUAUUACGCGUAUACGCCAACUUAGGUGAACGUGUACGCCAAGCUUUGUUAAAAACAGUACAAUUCUGUGAUGCCA	No mir-like hairpin predictions		No mir-like hairpin predictions				No
132	>MT358637.1_274	GCUGGUAUUGUUGGUGUACUGACAUUAGAUAAUCAAGAUCUCAAUGGUAACUGGUAUGAUUUCGGUGAUUUCAUACAAACCACGCCAGGUAGUGGAGU	Result of MT358637.1_274	-15.1	No mir-like hairpin predictions				No
133	>MT358637.1_278	UUAACCUUGACCAGGGCUUUAACUGCAGAGUCACAUGUUGACACUGACUUAACAAAGCCUUACAUUAAGUGGGAUUUGUUAAAAUAUGACUUCACGGAAGAGAGGUUAA	Result of MT358637.1_278	-17.9	No mir-like hairpin predictions				No
134	>MT358637.1_279	GACCAGGGCUUUAACUGCAGAGUCACAUGUUGACACUGACUUAACAAAGCCUUACAUUAAGUGGGAUUUGUUAAAAUAUGACUUCACGGAAGAGAGGUUAAAACUC	Result of MT358637.1_279	-17.9	No mir-like hairpin predictions				No
135	>MT358637.1_281	CUGCAUUGUGCAAACUUUAAUGUUUUAUUCUCUACAGUGUUCCCACUUACAAGUUUUGGACCACUAGUGAGAAAAAUAUUUGUUGAUGGUGUUCCAUUUGUAG	Result of MT358637.1_281	-16.6	>MT358637.1_Seq_281	CUGCAUUGUGCAAACUUUAAUGUUUUAUUCUCUACAGUGUUCCCACUUACAAGUUUUGGACCACUAGUGAGAAAAAUAUUUGUUGAUGGUGUUCCAUUUG			No
136	>MT358637.1_282	ACAGAUGCAUUCUGCAUUGUGCAAACUUUAAUGUUUUAUUCUCUACAGUGUUCCCACUUACAAGUUUUGGACCACUAGUGAGAAAAAUAUUUGUUGAUGGUGUUCCAUUUGU	Result of MT358637.1_282	-16.3	>MT358637.1_Seq_282	CUGCAUUGUGCAAACUUUAAUGUUUUAUUCUCUACAGUGUUCCCACUUACAAGUUUUGGACCACUAGUGAGAAAAAUAUUUGUUGAUGGUGUUCCAUUUG			No
137	>MT358637.1_284	CUAGUGAGAAAAAUAUUUGUUGAUGGUGUUCCAUUUGUAGUUUCAACUGGAUACCACUUCAGAGAGCUAGGUGUUGUACAUAAUCAGGAUGUAAACUUACAUAG	No mir-like hairpin predictions		No mir-like hairpin predictions				No
138	>MT358637.1_285	CAUUUGUAGUUUCAACUGGAUACCACUUCAGAGAGCUAGGUGUUGUACAUAAUCAGGAUGUAAACUUACAUAGCUCUAGACUUAGUUUUAAGGAAUUACUUGUG	No mir-like hairpin predictions		No mir-like hairpin predictions				No
139	>MT358637.1_286	UCAGAGAGCUAGGUGUUGUACAUAAUCAGGAUGUAAACUUACAUAGCUCUAGACUUAGUUUUAAGGAAUUACUUGUGUAUGCUGCUGACCCUGCUAUGCACGCUGCUUCUGG	Result of MT358637.1_286	-15.2	No mir-like hairpin predictions				No
140	>MT358637.1_287	UUACUUGUGUAUGCUGCUGACCCUGCUAUGCACGCUGCUUCUGGUAAUCUAUUACUAGAUAAACGCACUACGUGCUUUUCAGUAGCUGCACUUACUAA	Result of MT358637.1_287	-24.7	>MT358637.1_Seq_287	ACUUGUGUAUGCUGCUGACCCUGCUAUGCACGCUGCUUCUGGUAAUCUAUUACUAGAUAAACGCACUACGUGCUUUUCAGUAGCUGCACUUACUAA			Yes
141	>MT358637.1_291	AUGACUACUAUCGUUAUAAUCUACCAACAAUGUGUGAUAUCAGACAACUACUAUUUGUAGUUGAAGUUGUUGAUAAGUACUUUGAUUGUUACGAUGGUGGCUGU	Result of MT358637.1_291	-19.4	No mir-like hairpin predictions				No
142	>MT358637.1_292	AGUUGAAGUUGUUGAUAAGUACUUUGAUUGUUACGAUGGUGGCUGUAUUAAUGCUAACCAAGUCAUCGUCAACAACCUAGACAAAUCAGCUGGUUUUCCAUU	Result of MT358637.1_292	-21.2	>MT358637.1_Seq_292	GUUGAAGUUGUUGAUAAGUACUUUGAUUGUUACGAUGGUGGCUGUAUUAAUGCUAACCAAGUCAUCGUCAACAACCUAGACAAAUCAGCUGGUUUUCCAUU			Yes
143	>MT358637.1_295	GCUCGCACCGUAGCUGGUGUCUCUAUCUGUAGUACUAUGACCAAUAGACAGUUUCAUCAAAAAUUAUUGAAAUCAAUAGCCGCCACUAGAGGAGCUACUGUAGU	No mir-like hairpin predictions		No mir-like hairpin predictions				No
144	>MT358637.1_301	AACGUGUUGUAGCUUGUCACACCGUUUCUAUAGAUUAGCUAAUGAGUGUGCUCAAGUAUUGAGUGAAAUGGUCAUGUGUGGCGGUUCACUAUAUGUU	Result of MT358637.1_301	-18.4	No mir-like hairpin predictions				No
145	>MT358637.1_304	UCAUCAGGAGAUGCCACAACUGCUUAUGCUAAUAGUGUUUUUAACAUUUGUCAAGCUGUCACGGCCAAUGUUAAUGCACUUUUAUCUACUGAUGG	No mir-like hairpin predictions		No mir-like hairpin predictions				No
146	>MT358637.1_305	CAGACUUUAUGAGUGUCUCUAUAGAAAUAGAGAUGUUGACACAGACUUUGUGAAUGAGUUUUACGCAUAUUUGCGUAAACAUUUCUCAAUGAUGAUACUCUCUG	No mir-like hairpin predictions		No mir-like hairpin predictions				No
147	>MT358637.1_306	GCGUAAACAUUUCUCAAUGAUGAUACUCUCUGACGAUGCUGUUGUGUGUUUCAAUAGCACUUAUGCAUCUCAAGGUCUAGUGGCUAGCAUAAAGAACUUUAAGU	Result of MT358637.1_306	-17	No mir-like hairpin predictions				No
148	>MT358637.1_307	AGGUCUAGUGGCUAGCAUAAAGAACUUUAAGUCAGUUCUUUAUUAUCAAAACAAUGUUUUUAUGUCUGAAGCAAAAUGUUGGACUGAGACUGACCUUACUAAAGGACCU	No mir-like hairpin predictions		No mir-like hairpin predictions				No
149	>MT358637.1_309	UUAUUAUCAAAACAAUGUUUUUAUGUCUGAAGCAAAAUGUUGGACUGAGACUGACCUUACUAAAGGACCUCAUGAAUUUUGCUCUCAACAUACAAUGCUAGUUAAACAGGGUGAUGA	No mir-like hairpin predictions		No mir-like hairpin predictions				No
150	>MT358637.1_310	UUUUGCUCUCAACAUACAAUGCUAGUUAAACAGGGUGAUGAUUAUGUGUACCUUCCUUACCCAGAUCCAUCAAGAAUCCUAGGGGCCGGCUGUUUUGUAGAUGAUAUCGUAAAA	No mir-like hairpin predictions		No mir-like hairpin predictions				No
151	>MT358637.1_311	ACCCAGAUCCAUCAAGAAUCCUAGGGGCCGGCUGUUUUGUAGAUGAUAUCGUAAAAACAGAUGGUACACUUAUGAUUGAACGGU	No mir-like hairpin predictions		No mir-like hairpin predictions				No
152	>MT358637.1_315	UGUUAGACAUGUAUUCUGUUAUGCUUACUAAUGAUAACACUUCAAGGUAUUGGGAACCUGAGUUUUAUGAGGCUAUGUACACACCGCAUACAGUCUUACA	No mir-like hairpin predictions		No mir-like hairpin predictions				No
153	>MT358637.1_316	GAGUUUUAUGAGGCUAUGUACACACCGCAUACAGUCUUACAGGCUGUUGGGGCUUGUGUUCUUUGCAAUUCACAGACUU	Result of MT358637.1_316	-23.1	No mir-like hairpin predictions				Yes
154	>MT358637.1_318	UGCUUGCAUACGUAGACCAUUCUUAUGUUGUAAAUGCUGUUACGACCAUGUCAUAUCAACAUCACAUAAAUUAGUCUUGUCUGUUAAUCCGUAUGUUUGCA	No mir-like hairpin predictions		No mir-like hairpin predictions				No
155	>MT358637.1_319	GUUACGACCAUGUCAUAUCAACAUCACAUAAAUUAGUCUUGUCUGUUAAUCCGUAUGUUUGCAAUGCUCCAGGUUGUGAUGUCACAGAUGUGAC	Result of MT358637.1_319	-20	No mir-like hairpin predictions				Yes
156	>MT358637.1_320	AUGUUUGCAAUGCUCCAGGUUGUGAUGUCACAGAUGUGACUCAACUUUACUUAGGAGGUAUGAGCUAUUAUUGUAAAUCACAUAAACCACCCAUUAGUUUUCCAU	Result of MT358637.1_320	-21.3	No mir-like hairpin predictions				Yes
157	>MT358637.1_321	UAUGAGCUAUUAUUGUAAAUCACAUAAACCACCCAUUAGUUUUCCAUUGUGUGCUAAUGGACAAGUUUUUGGUUUAUAUAAAAAUACAUGUGUUGGUAGCGAUA	No mir-like hairpin predictions		No mir-like hairpin predictions				No
158	>MT358637.1_322	UACAUGUGUUGGUAGCGAUAAUGUUACUGACUUUAAUGCAAUUGCAACAUGUGACUGGACAAAUGCUGGUGAUUACAUUUUAGCUAACACCUGUA	No mir-like hairpin predictions		No mir-like hairpin predictions				No
159	>MT358637.1_324	UUUUGCAGCAGAAACGCUCAAAGCUACUGAGGAGACAUUUAAACUGUCUUAUGGUAUUGCUACUGUACGUGAAGUGCUGUCUGA	Result of MT358637.1_324	-22.5	No mir-like hairpin predictions				Yes
160	>MT358637.1_325	UUAAACUGUCUUAUGGUAUUGCUACUGUACGUGAAGUGCUGUCUGACAGAGAAUUACAUCUUUCAUGGGAAGUUGGUAAACCUAGACCACCACUUAA	No mir-like hairpin predictions		No mir-like hairpin predictions				No
161	>MT358637.1_327	UGUAACUAAAAACAGUAAAGUACAAAUAGGAGAGUACACCUUUGAAAAAGGUGACUAUGGUGAUGCUGUUGUUUACCGAGGUACA	No mir-like hairpin predictions		No mir-like hairpin predictions				No
162	>MT358637.1_328	AGGUGACUAUGGUGAUGCUGUUGUUUACCGAGGUACAACAACUUACAAAUUAAAUGUUGGUGAUUAUUUUGUGCUGACAUCACAUACAGUAAUGCCAUUAAGUGCACCU	No mir-like hairpin predictions		>MT358637.1_Seq_328	AGGUGACUAUGGUGAUGCUGUUGUUUACCGAGGUACAACAACUUACAAAUUAAAUGUUGGUGAUUAUUUUGUGCUGACAUCACAUACAGUAAUGCCAUUAAGUGCACC			Yes
163	>MT358637.1_329	GUAAUGCCAUUAAGUGCACCUACACUAGUGCCACAAGAGCACUAUGUUAGAAUUACUGGCUUAUAC	Result of MT358637.1_329	-15.1	No mir-like hairpin predictions				No
164	>MT358637.1_331	GGUUGGUAUGCAAAAGUAUUCUACACUCCAGGGACCACCUGGUACUGGUAAGAGUCAUUUUGCUAUUGGCCUAGCU	Result of MT358637.1_331	-26.2	>MT358637.1_Seq_331	GGUUGGUAUGCAAAAGUAUUCUACACUCCAGGGACCACCUGGUACUGGUAAGAGUCAUUUUGCUAUUGGCCUA			Yes
165	>MT358637.1_333	UCUGCUCGCAUAGUGUAUACAGCUUGCUCUCAUGCCGCUGUUGAUGCACUAUGUGAGAAGG	Result of MT358637.1_333	-29.6	>MT358637.1_Seq_333	UGCUCGCAUAGUGUAUACAGCUUGCUCUCAUGCCGCUGUUGAUGCACUAUGUGAGAAGG			Yes
166	>MT358637.1_336	UCAAAGUGAAUUCAACAUUAGAACAGUAUGUCUUUUGUACUGUAAAUGCAUUGCCUGAGACGACAGCAGAUAUAGUUGUCUUUGAUGAAAUUUCAAUGG	No mir-like hairpin predictions		No mir-like hairpin predictions				No
167	>MT358637.1_337	UGUAAAUGCAUUGCCUGAGACGACAGCAGAUAUAGUUGUCUUUGAUGAAAUUUCAAUGGCCACAAAUUAUGAUUUGAGUGUUGUCAAUGCCAGAUUACGUGCUAAGCA	Result of MT358637.1_337	-19	No mir-like hairpin predictions				No
168	>MT358637.1_338	AAUUUCAAUGGCCACAAAUUAUGAUUUGAGUGUUGUCAAUGCCAGAUUACGUGCUAAGCACUAUGUGUACAUUGGCGACCCUGCUCAAUUACCUGCACCACGCACAUU	Result of MT358637.1_338	-22.3	No mir-like hairpin predictions				Yes
169	>MT358637.1_343	GGAACUUGUCGGCGUUGUCCUGCUGAAAUUGUUGACACUGUGAGUGCUUUGGUUUAUGAUAAUAAGCUUAAAGCACAUAAAGACAAAUCAGCUCAAUGCUUUAAAAUGUUUU	Result of MT358637.1_343	-22.1	>MT358637.1_Seq_343	CGGCGUUGUCCUGCUGAAAUUGUUGACACUGUGAGUGCUUUGGUUUAUGAUAAUAAGCUUAAAGCACAUAAAGACAAAUCAGCUCAAUGCUUUAAAAU			Yes
170	>MT358637.1_347	AGGCCACAAAUAGGCGUGGUAAGAGAAUUCCUUACACGUAACCCUGCUUGGAGAAAAGCUGUCUUUAUUUCACCUUAUAAUUCACAGAAUGCUGUAGCCU	No mir-like hairpin predictions		No mir-like hairpin predictions				No
171	>MT358637.1_353	GUUGCAAUUUACAAGUCUUGAAAUUCCACGUAGGAAUGUGGCAACUUUACAAGCUGAAAAUGUAAC	Result of MT358637.1_353	-14.8	No mir-like hairpin predictions				No
172	>MT358637.1_354	GUAGGAAUGUGGCAACUUUACAAGCUGAAAAUGUAACAGGACUCUUUAAAGAUUGUAGUAAGGUAAUCACUGGGUUACAUCCUACACAGGCACCUAC	No mir-like hairpin predictions		No mir-like hairpin predictions				No
173	>MT358637.1_355	UGGGUUACAUCCUACACAGGCACCUACACACCUCAGUGUUGACACUAAAUUCAAAACUGAAGGUUUAUGUGUUGACAUACCUGGCAUACCUA	No mir-like hairpin predictions		No mir-like hairpin predictions				No
174	>MT358637.1_356	AGGUAAUCACUGGGUUACAUCCUACACAGGCACCUACACACCUCAGUGUUGACACUAAAUUCAAAACUGAAGGUUUAUGUGUUGACAUACCUGGCAUACCU	No mir-like hairpin predictions		No mir-like hairpin predictions				No
175	>MT358637.1_357	GUGUUGACAUACCUGGCAUACCUAAGGACAUGACCUAUAGAAGACUCAUCUCUAUGAUGGGUUUUAAAAUGAAUUAUCAAGUUAAUGGUUACCCUAACAUGUUUAUCAC	No mir-like hairpin predictions		No mir-like hairpin predictions				No
176	>MT358637.1_366	AUCUCUCUGACAGAGUCGUAUUUGUCUUAUGGGCACAUGGCUUUGAGUUGACAUCUAUGAAGUAUUUUGUGAAAAUAGGACCUGAGCGCACCUGUUGUCUAUGUGAU	Result of MT358637.1_366	-21.5	No mir-like hairpin predictions				Yes
177	>MT358637.1_368	GUGAUAGACGUGCCACAUGCUUUUCCACUGCUUCAGACACUUAUGCCUGUUGGCAUCAUUCUAUUGGAUUUGAUUACGUCUAUAAU	No mir-like hairpin predictions		No mir-like hairpin predictions				No
178	>MT358637.1_369	ACUUAUGCCUGUUGGCAUCAUUCUAUUGGAUUUGAUUACGUCUAUAAUCCGUUUAUGAUUGAUGUUCAACAAUGGGGUUUUACAGGU	Result of MT358637.1_369	-20.5	>MT358637.1_Seq_369	ACUUAUGCCUGUUGGCAUCAUUCUAUUGGAUUUGAUUACGUCUAUAAUCCGUUUAUGAUUGAUGUUCAACAAUGGGGUUUUA			Yes
179	>MT358637.1_370	UUAUGAUUGAUGUUCAACAAUGGGGUUUUACAGGUAACCUACAAAGCAACCAUGAUCUGUAUUGUCAAGUCCAUGGUAAUGCACAUGUAGCUAGUUGUGAUGCAAUCAUGA	Result of MT358637.1_370	-22.6	No mir-like hairpin predictions				Yes
180	>MT358637.1_373	AAUUGGUGAUGAACUGAAGAUUAAUGCGGCUUGUAGAAAGGUUCAACACAUGGUUGUUAAAGCUGCAUUAUUAGCAGACAAAUUCCCAGUU	Result of MT358637.1_373	-23.7	No mir-like hairpin predictions				Yes
181	>MT358637.1_374	UGCAUUAUUAGCAGACAAAUUCCCAGUUCUUCACGACAUUGGUAACCCUAAAGCUAUUAAGUGUGUACCUCAAGCUGAUGUAGAAUGGAAGUUCUAUGAUGCA	Result of MT358637.1_378	-20.5	No mir-like hairpin predictions				Yes
182	>MT358637.1_378	UAUUCUUAUGCCACACAUUCUGACAAAUUCACAGAUGGUGUAUGCCUAUUUUGGAAUUGCAAUGUCGAUAGAUAUCCUGCUAAUUCCAUUGUUUGUAGAUUUGACACUAGAGUG	Result of MT358637.1_380	-17.1	No mir-like hairpin predictions				No
183	>MT358637.1_380	UGUUUGUAGAUUUGACACUAGAGUGCUAUCUAACCUUAACUUGCCUGGUUGUGAUGGUGGCAGUUUGUAUGUAAAUAAACA	No mir-like hairpin predictions		No mir-like hairpin predictions				No
184	>MT358637.1_381	UAUGUAAAUAAACAUGCAUUCCACACACCAGCUUUUGAUAAAAGUGCUUUUGUUAAUUUAAAACAAUUACCAUUUUUCUAUUACUCUGACAGUCCAUGUGAGUCUCAUG	No mir-like hairpin predictions		No mir-like hairpin predictions				No
185	>MT358637.1_382	CAUUUUUCUAUUACUCUGACAGUCCAUGUGAGUCUCAUGGAAAACAAGUAGUGUCAGAUAUAGAUUAUG	Result of MT358637.1_382	-16.1	No mir-like hairpin predictions				No
186	>MT358637.1_383	CUCAUGGAAAACAAGUAGUGUCAGAUAUAGAUUAUGUACCACUAAAGUCUGCUACGUGUAUAACACGUUGCAAUUUAGGUGGUGCUGUCUGUAGACAUCAUGCUAAUGAG	Result of MT358637.1_383	-30.2	>MT358637.1_Seq_383	ACAAGUAGUGUCAGAUAUAGAUUAUGUACCACUAAAGUCUGCUACGUGUAUAACACGUUGCAAUUUAGGUGGUGCUGUCUGUAGACAUCAUGCUAAUGAG			Yes
187	>MT358637.1_387	ACAAGACUUCAGAGUUUAGAAAAUGUGGCUUUUAAUGUUGUAAAUAAGGGACACUUUGAUGGACAACAGGGUGAAGUACCAGUUUCUAUCAUUAAUAACACUGU	No mir-like hairpin predictions		No mir-like hairpin predictions				No
188	>MT358637.1_388	AACAGGGUGAAGUACCAGUUUCUAUCAUUAAUAACACUGUUUACACAAAAGUUGAUGGUGUUGAUGUAGAAUUGUUUGAAAAUAAAACAACAUUACCUGUU	No mir-like hairpin predictions		No mir-like hairpin predictions				No
189	>MT358637.1_392	CAAAAGAGAUGCUCCAGCACAUAUAUCUACUAUUGGUGUUUGUUCUAUGACUGACAUAGCCAAGAAACCAACUGAAACGAUUUGUGCACCACUCACUGUCUUUUUUG	No mir-like hairpin predictions		No mir-like hairpin predictions				No
190	>MT358637.1_394	UGGUAGAGUUGAUGGUCAAGUAGACUUAUUUAGAAAUGCCCGUAAUGGUGUUCUUAUUACAGAAGGUAGUGUUAAAGGUUUACAACCAUCUGUAGGUCCCA	Result of MT358637.1_394	-21.3	No mir-like hairpin predictions				Yes
191	>MT358637.1_395	GACUUAUUUAGAAAUGCCCGUAAUGGUGUUCUUAUUACAGAAGGUAGUGUUAAAGGUUUACAACCAUCUGUAGGUCCCAAACAAGCUAGUCUUAAUGGAGUC	No mir-like hairpin predictions		No mir-like hairpin predictions				No
192	>MT358637.1_396	ACCAUCUGUAGGUCCCAAACAAGCUAGUCUUAAUGGAGUCACAUUAAUUGGAGAAGCCGUAAAAACACAGUUCAAUUAUUAUAAGAAAGUUGAUGGU	No mir-like hairpin predictions		No mir-like hairpin predictions				No
193	>MT358637.1_399	GAUUUCUUAGAAUUAGCUAUGGAUGAAUUCAUUGAACGGUAUAAAUUAGAAGGCUAUGCCUUCGAACAUAUCGUUUAUGGAGAUUUUAGUCAUAGUCAGUUAGGUGGUU	Result of MT358637.1_399	-25	No mir-like hairpin predictions				Yes
194	>MT358637.1_401	CAUCUACUGAUUGGACUAGCUAAACGUUUUAAGGAAUCACCUUUUGAAUUAGAAGAUUUUAUUCCUAUGGACAGUACAGUUAAAAACUAUUUCAUAACAGAUG	No mir-like hairpin predictions		No mir-like hairpin predictions				No
195	>MT358637.1_404	AUCCCAAGAUUUAUCUGUAGUUUCUAAGGUUGUCAAAGUGACUAUUGACUAUACAGAAAUUUCAUUUAUGCUUUGGUGU	No mir-like hairpin predictions		No mir-like hairpin predictions				No
196	>MT358637.1_405	GGUUGUCAAAGUGACUAUUGACUAUACAGAAAUUUCAUUUAUGCUUUGGUGUAAAGAUGGCCAUGUAGAAACAUUUUACCCAAAAUUACAAUCUAGUCAAGCGUGGCAACC	No mir-like hairpin predictions		No mir-like hairpin predictions				No
197	>MT358637.1_408	GCUGUACCCUAUAAUAUGAGAGUUAUACAUUUUGGUGCUGGUUCUGAUAAAGGAGUUGCACCAGGUACAGCUGUUUUAAGACAGU	Result of MT358637.1_408	-28.2	No mir-like hairpin predictions				Yes
198	>MT358637.1_409	GGAGUUGCACCAGGUACAGCUGUUUUAAGACAGUGGUUGCCUACGGGUACGCUGCUUGUCGAUUCAGAUCUUAAUGACUUUGUCUCUGAUGCAGAUUC	No mir-like hairpin predictions		No mir-like hairpin predictions				No
199	>MT358637.1_410	GGAGUUGCACCAGGUACAGCUGUUUUAAGACAGUGGUUGCCUACGGGUACGCUGCUUGUCGAUUCAGAUCUUAAUGACUUUGUCUCUGAUGCAGAUUCAACUUU	No mir-like hairpin predictions		No mir-like hairpin predictions				No
200	>MT358637.1_412	UCUUAAUGACUUUGUCUCUGAUGCAGAUUCAACUUUGAUUGGUGAUUGUGCAACUGUACAUACAGCUAAUAAAUGGGAUCUCAUUAUUAGUGAUAUGUACGACCCUAAGA	Result of MT358637.1_412	-21.6	No mir-like hairpin predictions				Yes
201	>MT358637.1_413	UUCAACUUUGAUUGGUGAUUGUGCAACUGUACAUACAGCUAAUAAAUGGGAUCUCAUUAUUAGUGAUAUGUACGACCCUAAGACUAAAAAUGUUACAAAAGAA	No mir-like hairpin predictions		No mir-like hairpin predictions				No
202	>MT358637.1_418	UUCGCAUGGUGGACAGCCUUUGUUACUAAUGUGAAUGCGUCAUCAUCUGAAGCAUUUUUAAUUGGAUGUAAUUAUCUUGGCAAACCACGCGAA	Result of MT358637.1_418	-23.6	No mir-like hairpin predictions				Yes
203	>MT358637.1_420	AAAUCCAAUUCAGUUGUCUUCCUAUUCUUUAUUUGACAUGAGUAAAUUUCCCCUUAAAUUAAGGGGUACUGCUGUUAUGUCUUUAAAAGAAGGUCAAAUCAAUGAUAUGAUUU	No mir-like hairpin predictions		>MT358637.1_Seq_420	UCAGUUGUCUUCCUAUUCUUUAUUUGACAUGAGUAAAUUUCCCCUUAAAUUAAGGGGUACUGCUGUUAUGUCUUUAAAAGAAGGUCAAAUCAAUGAUAU			Yes
204	>MT358637.1_427	CAGGACUUGUUCUUACCUUUCUUUUCCAAUGUUACUUGGUUCCAUGCUAUACAUGUCUCUGGGACCAAUGGUACUAAGAGGUUUGAUAACCCUG	Result of MT358637.1_427	-24.4	No mir-like hairpin predictions				Yes
205	>MT358637.1_431	CUGUGAAUUUCAAUUUUGUAAUGAUCCAUUUUUGGGUGUUUAUUACCACAAAAACAACAAAAGUUGGAUGGAAAGUGAGUUCAGAGUUUAUUCUAG	Result of MT358637.1_431	-15.6	No mir-like hairpin predictions				No
206	>MT358637.1_435	GCCUAUUAAUUUAGUGCGUGAUCUCCCUCAGGGUUUUUCGGCUUUAGAACCAUUGGUAGAUUUGCCAAUAGGUAUUAACAUCACUAGGU	No mir-like hairpin predictions		No mir-like hairpin predictions				No
207	>MT358637.1_441	CUUCACUGUAGAAAAAGGAAUCUAUCAAACUUCUAACUUUAGAGUCCAACCAACAGAAUCUAUUGUUAGAUUUCCUAAUAUUACAAACUUGUGCCCUUUUGGUGAAG	No mir-like hairpin predictions		No mir-like hairpin predictions				No
208	>MT358637.1_442	UUGUUAGAUUUCCUAAUAUUACAAACUUGUGCCCUUUUGGUGAAGUUUUUAACGCCACCAGAUUUGCAUCUGUUUAUGCUUGGAACAGGAAGAGAAUCAGCAA	No mir-like hairpin predictions		No mir-like hairpin predictions				No
209	>MT358637.1_444	UGUUAUGGAGUGUCUCCUACUAAAUUAAAUGAUCUCUGCUUUACUAAUGUCUAUGCAGAUUCAUUUGUAAUUAGAGGUGAUGAAGUCAGACAAAUCGCUCCAGGGCA	Result of MT358637.1_444	-19.9	>MT358637.1_Seq_444	UGUUAUGGAGUGUCUCCUACUAAAUUAAAUGAUCUCUGCUUUACUAAUGUCUAUGCAGAUUCAUUUGUAAUUAGAGGUGAUGAAGUCAGACAAA			No
210	>MT358637.1_445	UCAUUUGUAAUUAGAGGUGAUGAAGUCAGACAAAUCGCUCCAGGGCAAACUGGAAAGAUUGCUGAUUAUAAUUAUAAAUUACCAGAUGA	Result of MT358637.1_445	-25.4	>MT358637.1_Seq_445	UUGUAAUUAGAGGUGAUGAAGUCAGACAAAUCGCUCCAGGGCAAACUGGAAAGAUUGCUGAUUAUAAUUAUAAAUUACCAGAUGA			Yes
211	>MT358637.1_446	AUUACCAGAUGAUUUUACAGGCUGCGUUAUAGCUUGGAAUUCUAACAAUCUUGAUUCUAAGGUUGGUGGUAAUUAUAAUUACCUGUAUAGAUUGUUUAGGAAGU	No mir-like hairpin predictions		No mir-like hairpin predictions				No
212	>MT358637.1_447	GGUGGUAAUUAUAAUUACCUGUAUAGAUUGUUUAGGAAGUCUAAUCUCAAACCUUUUGAGAGAGAUAUUUCAACUGAAAUCUAUCAGGCCGGUAGCACACC	Result of MT358637.1_447	-22.6	>MT358637.1_Seq_447	AAUUAUAAUUACCUGUAUAGAUUGUUUAGGAAGUCUAAUCUCAAACCUUUUGAGAGAGAUAUUUCAACUGAAAUCUAUCAGGCCGGUAGCACACC			Yes
213	>MT358637.1_448	AACCUUUUGAGAGAGAUAUUUCAACUGAAAUCUAUCAGGCCGGUAGCACACCUUGUAAUGGUGUUGAAGGUUUUAAUUGUUACUUUCCUUUACAAUCAUAUGGUU	Result of MT358637.1_448	-16.1	No mir-like hairpin predictions				No
214	>MT358637.1_449	GAAAUCUAUCAGGCCGGUAGCACACCUUGUAAUGGUGUUGAAGGUUUUAAUUGUUACUUUCCUUUACAAUCAUAUGGUUUC	No mir-like hairpin predictions		No mir-like hairpin predictions				No
215	>MT358637.1_450	UGAAGGUUUUAAUUGUUACUUUCCUUUACAAUCAUAUGGUUUCCAACCCACUAAUGGUGUUGGUUACCAACCAUACAGAGUAGUAGUACUUUCUUUUGAACUUCUA	No mir-like hairpin predictions		No mir-like hairpin predictions				No
216	>MT358637.1_451	CAGAGUAGUAGUACUUUCUUUUGAACUUCUACAUGCACCAGCAACUGUUUGUGGACCUAAAAAGUCUACUAAUUUG	Result of MT358637.1_451	-16.4	No mir-like hairpin predictions				No
217	>MT358637.1_452	AACUGUUUGUGGACCUAAAAAGUCUACUAAUUUGGUUAAAAACAAAUGUGUCAAUUUCAACUUCAAUGGUUUAACAGGCACAGGUGUUCUUACUGAGUCUAACAAAAAGUU	No mir-like hairpin predictions		No mir-like hairpin predictions				No
218	>MT358637.1_453	AAAGUCUACUAAUUUGGUUAAAAACAAAUGUGUCAAUUUCAACUUCAAUGGUUUAACAGGCACAGGUGUUCUUACUGAGUCUAACAAAAAGUUUCUGCCUUU	No mir-like hairpin predictions		No mir-like hairpin predictions				No
219	>MT358637.1_455	ACAGGUGUUCUUACUGAGUCUAACAAAAAGUUUCUGCCUUUCCAACAAUUUGGCAGAGACAUUGCUGACACUACUGAUGCUGU	Result of MT358637.1_455	-18.3	No mir-like hairpin predictions				No
220	>MT358637.1_458	CAUGUUCUUUUGGUGGUGUCAGUGUUAUAACACCAGGAACAAAUACUUCUAACCAGGUUGCUGUUCUUUAUCAGGGUGUUAACUGCACAGAAGUCCCUGUUGCUAUUCAUG	Result of MT358637.1_458	-21.5	No mir-like hairpin predictions				Yes
221	>MT358637.1_459	UGUUGCUAUUCAUGCAGAUCAACUUACUCCUACUUGGCGUGUUUAUUCUACAGGUUCUAAUGUUUUUCAAACACGUGCAGGCUGUUUAAUAGGGGCUGAACAUGUCAACA	Result of MT358637.1_459	-18.8	No mir-like hairpin predictions				No
222	>MT358637.1_461	GUUUUUCAAACACGUGCAGGCUGUUUAAUAGGGGCUGAACAUGUCAACAACUCAUAUGAGUGUGACAUACCCAUUGGUGCAGGUAUAUGCGCUAGUUAUCAGAC	No mir-like hairpin predictions		No mir-like hairpin predictions				No
223	>MT358637.1_462	AGUUAUCAGACUCAGACUAAUUCUCCUCGGCGGGCACGUAGUGUAGCUAGUCAAUCCAUCAUUGCCUACACUAUGUCACUUGGUGCAGAAAAUUCAGUUGCUUACUCUAAUAACU	Result of MT358637.1_462	-20.5	>MT358637.1_Seq_462	AGACUCAGACUAAUUCUCCUCGGCGGGCACGUAGUGUAGCUAGUCAAUCCAUCAUUGCCUACACUAUGUCACUUGGUGCAGAAAAUUCAGUUGCUUACUC			Yes
224	>MT358637.1_463	CUUGGUGCAGAAAAUUCAGUUGCUUACUCUAAUAACUCUAUUGCCAUACCCACAAAUUUUACUAUUAGUGUUACCACAGAAAUUCUACCAGUGUCUAUGACCAAG	No mir-like hairpin predictions		No mir-like hairpin predictions				No
225	>MT358637.1_465	GUACAAUGUACAUUUGUGGUGAUUCAACUGAAUGCAGCAAUCUUUUGUUGCAAUAUGGCAGUUUUUGUACACAAUUAAACCGUGCUUUAAC	No mir-like hairpin predictions		No mir-like hairpin predictions				No
226	>MT358637.1_471	GCAGAUGCUGGCUUCAUCAAACAAUAUGGUGAUUGCCUUGGUGAUAUUGCUGCUAGAGACCUCAUUUGUGCACAAAAGUUUAACGGCCUUACUGUUUUGCCACCUUUGC	Result of MT358637.1_471	-14.6	No mir-like hairpin predictions				No
227	>MT358637.1_472	UGCUAGAGACCUCAUUUGUGCACAAAAGUUUAACGGCCUUACUGUUUUGCCACCUUUGCUCACAGAUGAAAUGAUUGCUCAAUACA	No mir-like hairpin predictions		No mir-like hairpin predictions				No
228	>MT358637.1_473	CAGAUGAAAUGAUUGCUCAAUACACUUCUGCACUGUUAGCGGGUACAAUCACUUCUGGUUGGACCUUUGGUGCAGGUGCUGCAUUACAAAUACCAUUUG	Result of MT358637.1_473	-19.9	No mir-like hairpin predictions				No
229	>MT358637.1_474	UUCUGGUUGGACCUUUGGUGCAGGUGCUGCAUUACAAAUACCAUUUGCUAUGCAAAUGGCUUAUAGGUUUAAUGGUAUUGGAGUUACACAGAAUGUUCUCUAUGAGAA	No mir-like hairpin predictions		No mir-like hairpin predictions				No
230	>MT358637.1_478	AGUGCACUUGGAAAACUUCAAGAUGUGGUCAACCAAAAUGCACAAGCUUUAAACACGCUUGUUAAACAACUUAGCUCCAAUUUUGGUGCAAUUUCAAGUGUUUU	No mir-like hairpin predictions		No mir-like hairpin predictions				No
231	>MT358637.1_479	GCUUGUUAAACAACUUAGCUCCAAUUUUGGUGCAAUUUCAAGUGUUUUAAAUGAUAUCCUUUCACGUCUUGACAAAGUUGAGGCUGAAGUGCAAAUUGAUAGGU	Result of MT358637.1_479	-16	No mir-like hairpin predictions				No
232	>MT358637.1_480	AGUUGAGGCUGAAGUGCAAAUUGAUAGGUUGAUCACAGGCAGACUUCAAAGUUUGCAGACAUAUGUGACUCAACAAUUAAUUAGAGCUGCAGAAAUCAGAGCUUCUGCU	Result of MT358637.1_480	-21.7	>MT358637.1_Seq_480	GUUGAGGCUGAAGUGCAAAUUGAUAGGUUGAUCACAGGCAGACUUCAAAGUUUGCAGACAUAUGUGACUCAACAAUUAAUUAGAGCUGCAGAAAUCAGAG			Yes
233	>MT358637.1_482	AGCUGCAGAAAUCAGAGCUUCUGCUAAUCUUGCUGCUACUAAAAUGUCAGAGUGUGUACUUGGACAAUCAAAAAGAGUUGAUUUUUGUGGAAAGGGCU	No mir-like hairpin predictions		No mir-like hairpin predictions				No
234	>MT358637.1_483	GUCAGAGUGUGUACUUGGACAAUCAAAAAGAGUUGAUUUUUGUGGAAAGGGCUAUCAUCUUAUGUCCUUCCCUCAGUCAGCACCUCAUGGUGUAGUCUUCUUGCAUGUGAC	No mir-like hairpin predictions		No mir-like hairpin predictions				No
235	>MT358637.1_484	CAGUCAGCACCUCAUGGUGUAGUCUUCUUGCAUGUGACUUAUGUCCCUGCACAAGAAAAGAACUUCACAACUGCUCCUG	No mir-like hairpin predictions		No mir-like hairpin predictions				No
236	>MT358637.1_485	UGUCCCUGCACAAGAAAAGAACUUCACAACUGCUCCUGCCAUUUGUCAUGAUGGAAAAGCACACUUUCCUCGUGAAGGUGUCUUUGUUUCAAAUGGCACACA	No mir-like hairpin predictions		No mir-like hairpin predictions				No
237	>MT358637.1_488	UGUGUCUGGUAACUGUGAUGUUGUAAUAGGAAUUGUCAACAACACAGUUUAUGAUCCUUUGCAACCUGAAUUAGACUCA	Result of MT358637.1_488	-18.9	No mir-like hairpin predictions				No
238	>MT358637.1_489	GUCAACAACACAGUUUAUGAUCCUUUGCAACCUGAAUUAGACUCAUUCAAGGAGGAGUUAGAUAAAUAUUUUAAGAAUCAUACAUCACCAGAUGUUGAU	No mir-like hairpin predictions		No mir-like hairpin predictions				No
239	>MT358637.1_491	GAUUUAGGUGACAUCUCUGGCAUUAAUGCUUCAGUUGUAAACAUUCAAAAAGAAAUUGACCGCCUCAAUGAGGUUGCCAAGAAUUUAAAUGAAUC	Result of MT358637.1_491	-19.1	No mir-like hairpin predictions				No
240	>MT358637.1_492	GACCGCCUCAAUGAGGUUGCCAAGAAUUUAAAUGAAUCUCUCAUCGAUCUCCAAGAACUUGGAAAGUAUGAGCAGUAUAUAAAAUGGCCAUGGUACAUUUGGCUAGGUU	No mir-like hairpin predictions		No mir-like hairpin predictions				No
241	>MT358637.1_493	UCUCCAAGAACUUGGAAAGUAUGAGCAGUAUAUAAAAUGGCCAUGGUACAUUUGGCUAGGUUUUAUAGCUGGCUUGAUUGCCAUAGUAAUGGUGA	No mir-like hairpin predictions		No mir-like hairpin predictions				No
242	>MT358637.1_500	UGAGAAUCUUCACAAUUGGAACUGUAACUUUGAAGCAAGGUGAAAUCAAGGAUGCUACUCCUUCAGAUUUUGUUCGCGCUACUGCAACGAUACCGAUACAAGCCUCA	No mir-like hairpin predictions		No mir-like hairpin predictions				No
243	>MT358637.1_501	UGCAACGAUACCGAUACAAGCCUCACUCCCUUUCGGAUGGCUUAUUGUUGGCGUUGCA	Result of MT358637.1_501	-20.4	>MT358637.1_Seq_501	UGCAACGAUACCGAUACAAGCCUCACUCCCUUUCGGAUGGCUUAUUGUUGGCGUUGCA			Yes
244	>MT358637.1_503	GGCAACUAGCACUCUCCAAGGGUGUUCACUUUGUUUGCAACUUGCUGUUGUUGUUUGUAACAGUUUACUCACACCUUUUGCUCGUUGCUGCUGGCC	No mir-like hairpin predictions		No mir-like hairpin predictions				No
245	>MT358637.1_504	CGUUGCUGCUGGCCUUGAAGCCCCUUUUCUCUAUCUUUAUGCUUUAGUCUACUUCUUGCAGAGUAUAAACUUUGUAAGAAUAAUAAUGAGGCUUUGGCUUUGCUGGAAAUG	No mir-like hairpin predictions		No mir-like hairpin predictions				No
246	>MT358637.1_505	GAAGCCCCUUUUCUCUAUCUUUAUGCUUUAGUCUACUUCUUGCAGAGUAUAAACUUUGUAAGAAUAAUAAUGAGGCUUUGGCUUUGCUGGAAAUGCCGUUC	Result of MT358637.1_505	-23.1	No mir-like hairpin predictions				Yes
247	>MT358637.1_507	CCUUACAAUAGUGUAACUUCUUCAAUUGUCAUUACUUCAGGUGAUGGCACAACAAGUCCUAUUUCUGAACAUGACUACCAGAUUGGUGGUUAUACUGAAAAAUGGG	Result of MT358637.1_507	-21.9	No mir-like hairpin predictions				Yes
248	>MT358637.1_508	GAUUGGUGGUUAUACUGAAAAAUGGGAAUCUGGAGUAAAAGACUGUGUUGUAUUACACAGUUACUUCACUUCAGACUAUUACCAGCUGUACUCAACUCAAUU	Result of MT358637.1_508	-23.5	>MT358637.1_Seq_508	AUUGGUGGUUAUACUGAAAAAUGGGAAUCUGGAGUAAAAGACUGUGUUGUAUUACACAGUUACUUCACUUCAGACUAUUACCAGCUGUACUCAACUCAAU			Yes
249	>MT358637.1_509	UGUUGUAUUACACAGUUACUUCACUUCAGACUAUUACCAGCUGUACUCAACUCAAUUGAGUACAGACACUGGUGUUGAACAUGUUACCUUCUUCAUCUACAAUA	Result of MT358637.1_509	-20.9	No mir-like hairpin predictions				Yes
250	>MT358637.1_512	AAGAACAUGUCCAAAUUCACACAAUCGACGGUUCAUCCGGAGUUGUUAAUCCAGUAAUGGAACCAAUUUAUGAUGAACCGACGACGACUACUAGCGUGCCUU	Result of MT358637.1_512	-23.9	No mir-like hairpin predictions				Yes
251	>MT358637.1_514	GGUACGUUAAUAGUUAAUAGCGUACUUCUUUUUCUUGCUUUCGUGGUAUUCUUGCUAGUUACACUAGCCAUCCUUACUGCGCUUCGAUUGUGUGCGUACU	No mir-like hairpin predictions		No mir-like hairpin predictions				No
252	>MT358637.1_519	UAUUAGUUUUUCUGUUUGGAACUUUAAUUUUAGCCAUGGCAGAUUCCAACGGUACUAUUACCGUUGAAGAGCUUAAAAAGCUCCUUGAACAAUGGAACCUAGUA	No mir-like hairpin predictions		No mir-like hairpin predictions				No
253	>MT358637.1_522	CCAACAGGAAUAGGUUUUUGUAUAUAAUUAAGUUAAUUUUCCUCUGGCUGUUAUGGCCAGUAACUUUAGCUUGUUUUGUGCUUGCUGCUGUUUACAGAAUAAAUUGG	No mir-like hairpin predictions		No mir-like hairpin predictions				No
254	>MT358637.1_523	GAUCACCGGUGGAAUUGCUAUCGCAAUGGCUUGUCUUGUAGGCUUGAUGUGGCUCAGCUACUUCAUUGCUUCUUUCAGACUGUUUGCGCGUACGCGUUCCAUGUGGUC	Result of MT358637.1_523	-20.9	>MT358637.1_Seq_523	ACCGGUGGAAUUGCUAUCGCAAUGGCUUGUCUUGUAGGCUUGAUGUGGCUCAGCUACUUCAUUGCUUCUUUCAGACUGUUUGCGCGUACGCGUUCCAUGUGGUC			Yes
255	>MT358637.1_524	UUCUGACCAGACCGCUUCUAGAAAGUGAACUCGUAAUCGGAGCUGUGAUCCUUCGUGGACAUCUUCGUAUUGCUGGACACCAUCUAGGACGCUGUGACAUCAAGG	Result of MT358637.1_524	-27.1	No mir-like hairpin predictions				Yes
256	>MT358637.1_527	AGGACCUGCCUAAAGAAAUCACUGUUGCUACAUCACGAACGCUUUCUUAUUACAAAUUGGGAGCUUCGCAGCGUGUAGCAGGUGACUCAGGUUUU	Result of MT358637.1_527	-29.8	>MT358637.1_Seq_527	UAAAGAAAUCACUGUUGCUACAUCACGAACGCUUUCUUAUUACAAAUUGGGAGCUUCGCAGCGUGUAGCAGGUGACUCAGGUUUU			Yes
257	>MT358637.1_530	AGUAGCAGUGACAAUAUUGCUUUGCUUGUACAGUAAGUGACAACAGAUGUUUCAUCUCGUUGACUUUCAGGUUACUAUAGCAGAGAUAUUACU	No mir-like hairpin predictions		No mir-like hairpin predictions				No
258	>MT358637.1_531	GGUUACUAUAGCAGAGAUAUUACUAAUUAUUAUGAGGACUUUUAAAGUUUCCAUUUGGAAUCUUGAUUACAUCAUAAACCUCAUAAUUAAAAAUUUAUCUAAGUCACUAACU	No mir-like hairpin predictions		>MT358637.1_Seq_549	GUCUUGUAGUGCGUUGUUCGUUCUAUGAAGACUUUUUAGAGUAUCAUGACGUUCGUGUUGUUUUAGAUUUCAUCUAAACGAACAAACUAAAAUGUCUGAU			Yes
259	>MT358637.1_533	UUCUUUUCUUGGCACUGAUAACACUCGCUACUUGUGAGCUUUAUCACUACCAAGAGUGUGUUAGAG	Result of MT358637.1_533	-19.6	No mir-like hairpin predictions				No
260	>MT358637.1_535	GUGAGCUUUAUCACUACCAAGAGUGUGUUAGAGGUACAACAGUACUUUUAAAAGAACCUUGCUCUUCUGGAACAUACGAGGGCAAUUCAC	No mir-like hairpin predictions		No mir-like hairpin predictions				No
261	>MT358637.1_540	GGAAGUUCAAGAACUUUACUCUCCAAUUUUUCUUAUUGUUGCGGCAAUAGUGUUUAUAACACUUUGCUUCACACUCAAAAGAAAGACAGAAUGAUUGAACUUUC	No mir-like hairpin predictions		No mir-like hairpin predictions				No
262	>MT358637.1_545	UCAACCAUAUGUAGUUGAUGACCCGUGUCCUAUUCACUUCUAUUCUAAAUGGUAUAUUAGAGUAGGAGCUAGAAAAUCAGCACCUUUAAUUGAAUUGUGCGUGGAUGA	No mir-like hairpin predictions		No mir-like hairpin predictions				No
263	>MT358637.1_551	UGGUGGACCCUCAGAUUCAACUGGCAGUAACCAGAAUGGAGAACGCAGUGGGGCGCGAUCAAAACAACGUCGACCCCAAGGUUUACCCAAUAAUACUGCGUCUUGGUUCACCG	No mir-like hairpin predictions		No mir-like hairpin predictions				No
264	>MT358637.1_552	UUGGUUCACCGCUCUCACUCAACAUGGCAAGGAAGACCUUAAAUUCCCUCGAGGACAAGGCGUUCCAAUUAACACCAAUAGCAGUCCAGAUGACCAA	No mir-like hairpin predictions		No mir-like hairpin predictions				No
265	>MT358637.1_554	GGGCCAGAAGCUGGACUUCCCUAUGGUGCUAACAAAGACGGCAUCAUAUGGGUUGCAACUGAGGGAGCCU	Result of MT358637.1_554	-21.4	No mir-like hairpin predictions				Yes
266	>MT358637.1_557	GAACAACAUUGCCAAAAGGCUUCUACGCAGAAGGGAGCAGAGGCGGCAGUCAAGCCUCUUCUCGUUCCUCAUCACGUAGUCGCAACAGUUC	Result of MT358637.1_557	-28.6	No mir-like hairpin predictions				Yes
267	>MT358637.1_561	AGCUUGAGAGCAAAAUGUCUGGUAAAGGCCAACAACAACAAGGCCAAACUGUCACUAAGAAAUCUGCUGCUGAGGCU	Result of MT358637.1_561	-17.9	No mir-like hairpin predictions				No
268	>MT358637.1_564	UGUCGCGCAUUGGCAUGGAAGUCACACCUUCGGGAACGUGGUUGACCUACACAGGUGCCAUCAAAUUGGAUGACA	Result of MT358637.1_564	-17	No mir-like hairpin predictions				No
269	>MT358637.1_566	UGAUGAAACUCAAGCCUUACCGCAGAGACAGAAGAAACAGCAAACUGUGAUUCUUCUUCCUGCUGCAGAUUUGGAUGAUUUCUCCA	Result of MT358637.1_566	-21	>MT358637.1_Seq_566	GAAACUCAAGCCUUACCGCAGAGACAGAAGAAACAGCAAACUGUGAUUCUUCUUCCUGCUGCAGAUUUGGAUGAUUUCUCCA			Yes
270	>MT358637.1_569	GCCUAAACUCAUGCAGACCACACAAGGCAGAUGGGCUAUAUAAACGUUUUCGCUUUUCCGUUUACGAUAUAUAGUCUACUCUUGUGCAGAAUGAAUUCUCGU	Result of MT358637.1_569	-21.3	No mir-like hairpin predictions				Yes
271	>MT358637.1_572	UAGGGAGGACUUGAAAGAGCCACCACAUUUUCACCGAGGCCACGCGGAGUACGAUCGAGUGUACAGUGAACAAUGCUAGGGAGAGCUGCCUA	No mir-like hairpin predictions		No mir-like hairpin predictions				No
272	>MT358637.1_574	CUAGGGAGAGCUGCCUAUAUGGAAGAGCCCUAAUGUGUAAAAUUAAUUUUAGUAGUGCUAUCCCCAUGUGAUUUUAAUAGCUUCUUAG	No mir-like hairpin predictions		No mir-like hairpin predictions				No

## Sheet: mature miRNA
S.N.	Sequence ID	Sequence	miRNA ID	Sequence	miRNA ID	Sequence
1	>MT358637.1_8	AUGGAGAGCCUUGUCCCUGGUUUCAACGAGAAAACACACGUCCAACUCAGUUUGCCUGUUUUACAGGUUCGCGACGUGCUCGUACGUGGCUUUGGAGACUCCGU	>MT358637.1_8_miRNA_1	UUGCCUGUUUUACAGGUUCGCG	>MT358637.1_8_miRNA_2	UUCGCGACGUGCUCGUACGUGG
2	>MT358637.1_12	GUUUUGCCUCAACUUGAACAGCCCUAUGUGUUCAUCAAACGUUCGGAUGCUCGAACUGCACCUCAUGGUCAUGUUAUGGUUGAGCUGGUAGCAGAAC	>MT358637.1_12_miRNA_1	CGGAUGCUCGAACUGCACCUCA	>MT358637.1_12_miRNA_2	CACCUCAUGGUCAUGUUAUGGU
3	>MT358637.1_13	UGUGUUCAUCAAACGUUCGGAUGCUCGAACUGCACCUCAUGGUCAUGUUAUGGUUGAGCUGGUAGCAGAACUCGAAGGCAUUCAGUACGGUCGUAGUGGUGAGACA	>MT358637.1_13_miRNA_1	AUGCUCGAACUGCACCUCAUGG	>MT358637.1_13_miRNA_2	AGCUGGUAGCAGAACUCGAAGG
4	>MT358637.1_16	UCUUCGUAAGAACGGUAAUAAAGGAGCUGGUGGCCAUAGUUACGGCGCCGAUCUAAAGUCAUUUGACUUAGGCGACGAGCUUGGCACUGAUCCUUAUGAAGA	>MT358637.1_16_miRNA_1	AGCUGGUGGCCAUAGUUACGGC	>MT358637.1_16_miRNA_2	AGGCGACGAGCUUGGCACUGAU		Putative Pre-miRNA	91
5	>MT358637.1_18	ACAUAGCAGUGGUGUUACCCGUGAACUCAUGCGUGAGCUUAACGGAGGGGCAUACACUCGCUAUGU	>MT358637.1_18_miRNA_1	AGCAGUGGUGUUACCCGUGAAC	>MT358637.1_18_miRNA_2	UUAACGGAGGGGCAUACACUCG		Mature miRNA	189
6	>MT358637.1_26	CAAAUGAAUGCAACCAAAUGUGCCUUUCAACUCUCAUGAAGUGUGAUCAUUGUGGUGAAACUUCAUGGCAGACGGGCGAUUUUGUUAAAGCCACUUGCGAAUUUUG	>MT358637.1_26_miRNA_1	AAGUGUGAUCAUUGUGGUGAAA	>MT358637.1_26_miRNA_2	AAACUUCAUGGCAGACGGGCGA
7	>MT358637.1_29	AAUACCAUAAUGAAUCUGGCUUGAAAACCAUUCUUCGUAAGGGUGGUCGCACUAUUGCCUUUGGAGGCUGUGUGUUCUCUUAUGUUGGUUGCCAUAACAAGUGUGCCUAUU	>MT358637.1_29_miRNA_1	UAUUGCCUUUGGAGGCUGUGUG	>MT358637.1_29_miRNA_2	GUGUGUUCUCUUAUGUUGGUUG
8	>MT358637.1_30	GCCUUUGGAGGCUGUGUGUUCUCUUAUGUUGGUUGCCAUAACAAGUGUGCCUAUUGGGUUCCACGUGCUAGCGCUAACAUAGGUUGUAACCAUACAGGUGUUGUUGGAGAAGGUUCCGAAGGU	>MT358637.1_30_miRNA_1	GGAGGCUGUGUGUUCUCUUAUG	>MT358637.1_30_miRNA_2	CACGUGCUAGCGCUAACAUAGG
9	>MT358637.1_31	GGUUGCCAUAACAAGUGUGCCUAUUGGGUUCCACGUGCUAGCGCUAACAUAGGUUGUAACCAUACAGGUGUUGUUGGAGAAGGUUCCGAAGGUCUUAAUGACAACC	>MT358637.1_31_miRNA_1	CAUAACAAGUGUGCCUAUUGGG	>MT358637.1_31_miRNA_2	UGUUGGAGAAGGUUCCGAAGGU
10	>MT358637.1_37	AAAGGUGCCUGGAAUAUUGGUGAACAGAAAUCAAUACUGAGUCCUCUUUAUGCAUUUGCAUCAGAGGCUGCUCGUGUUGUACGAUCAAUUUUCUCCCGCACUCUU	>MT358637.1_37_miRNA_1	AAUCAAUACUGAGUCCUCUUUA	>MT358637.1_37_miRNA_2	AGAGGCUGCUCGUGUUGUACGA
11	>MT358637.1_43	UGCUAUGAUGUUCACAUCUGAUUUGGCUACUAACAAUCUAGUUGUAAUGGCCUACAUUACAGGUGGUGUUGUUCAGUUGACUUCGCAGUGGCUAACUAACAUCUUUGGCA	>MT358637.1_43_miRNA_1	GGCUACUAACAAUCUAGUUGUA	>MT358637.1_43_miRNA_2	UUACAGGUGGUGUUGUUCAGUU
12	>MT358637.1_46	UAACAUCUUUGGCACUGUUUAUGAAAAACUCAAACCCGUCCUUGAUUGGCUUGAAGAGAAGUUUAAGGAAGGUGUAGAGUUUCUUAGAGACGGUUGGGAAAUUGUUA	>MT358637.1_46_miRNA_1	ACUCAAACCCGUCCUUGAUUGG	>MT358637.1_46_miRNA_2	AAGGAAGGUGUAGAGUUUCUUA
13	>MT358637.1_56	UGAUGGUAACAAACAAUACCUUCACACUCAAAGGCGGUGCACCAACAAAGGUUACUUUUGGUGAUGACACUGUGAUAGAAGUGCAAGGUUACAAGAGUGUGAAUAUCA	>MT358637.1_56_miRNA_1	CACCAACAAAGGUUACUUUUGG	>MT358637.1_56_miRNA_2	UGACACUGUGAUAGAAGUGCAA
14	>MT358637.1_58	UUGAUAAAGUACUUAAUGAGAAGUGCUCUGCCUAUACAGUUGAACUCGGUACAGAAGUAAAUGAGUUCGCCUGUGUUGUGGCAGAUGCUGUCAUAAAAACUUUGCAA	>MT358637.1_58_miRNA_1	CUGCCUAUACAGUUGAACUCGG	>MT358637.1_58_miRNA_2	AUGCUGUCAUAAAAACUUUGCA
15	>MT358637.1_60	AAUUACUUACACCACUGGGCAUUGAUUUAGAUGAGUGGAGUAUGGCUACAUACUACUUAUUUGAUGAGUCUGGUGAGUUUAAAUU	>MT358637.1_60_miRNA_1	AUGGCUACAUACUACUUAUUUG	>MT358637.1_60_miRNA_2	UACUUAUUUGAUGAGUCUGGUG
16	>MT358637.1_62	UUGAUGAGUCUGGUGAGUUUAAAUUGGCUUCACAUAUGUAUUGUUCUUUUUACCCUCCAGAUGAGGAUGAAGAAGAAGGUGAUUGUGAAGAAGAAGAGUUUGAGCCAUCAA	>MT358637.1_62_miRNA_1	CUGGUGAGUUUAAAUUGGCUUC	>MT358637.1_62_miRNA_2	AUGAAGAAGAAGGUGAUUGUGA
17	>MT358637.1_65	AGCAAGAAGAAGAUUGGUUAGAUGAUGAUAGUCAACAAACUGUUGGUCAACAAGACGGCAGUGAGGACAAUCAGACAACUACUAUUCAAACAAUUGUU	>MT358637.1_65_miRNA_1	UGUUGGUCAACAAGACGGCAGU	>MT358637.1_65_miRNA_2	CAGUGAGGACAAUCAGACAACU
18	>MT358637.1_70	ACAAUGCCAUGCAAGUUGAAUCUGAUGAUUACAUAGCUACUAAUGGACCACUUAAAGUGGGUGGUAGUUGUGUUUUAAGCGGACACAAUCUUGCUAAACACUGU	>MT358637.1_70_miRNA_1	UUGAAUCUGAUGAUUACAUAGC	>MT358637.1_70_miRNA_2	GGUGGUAGUUGUGUUUUAAGCG
19	>MT358637.1_73	UUAUUAUCAGCUGGUAUUUUUGGUGCUGACCCUAUACAUUCUUUAAGAGUUUGUGUAGAUACUGUUCGCACAAAUGUCUACUUAGCUGUCUUUGAUAA	>MT358637.1_73_miRNA_1	UACAUUCUUUAAGAGUUUGUGU	>MT358637.1_73_miRNA_2	UUGUGUAGAUACUGUUCGCACA
20	>MT358637.1_74	CUUAGCUGUCUUUGAUAAAAAUCUCUAUGACAAACUUGUUUCAAGCUUUUUGGAAAUGAAGAGUGAAAAGCAAGUUGAACAAAAGAUCGCUGAGAUUCCUAAAGAGGAAGUUAAG	>MT358637.1_74_miRNA_1	UAUGACAAACUUGUUUCAAGCU	>MT358637.1_74_miRNA_2	AGAUUCCUAAAGAGGAAGUUAA
21	>MT358637.1_89	GUGUGGAAACUAAAGCCAUAGUUUCAACUAUACAGCGUAAAUAUAAGGGUAUUAAAAUACAAGAGGGUGUGGUUGAUUAUGGUGCUAGAUUUUACUUUUACAC	>MT358637.1_89_miRNA_1	AACUAUACAGCGUAAAUAUAAG	>MT358637.1_89_miRNA_2	UUGAUUAUGGUGCUAGAUUUUA
22	>MT358637.1_92	GCUAUGUAACACAUGGCUUAAAUUUGGAAGAAGCUGCUCGGUAUAUGAGAUCUCUCAAAGUGCCAGCUACAGUUUCUGUUUCUUCACCUGAUGCUGUUACAGCGU	>MT358637.1_92_miRNA_1	UAUGUAACACAUGGCUUAAAUU	>MT358637.1_92_miRNA_2	GGAAGAAGCUGCUCGGUAUAUG
23	>MT358637.1_108	UUAAUCCACCUGCUCUACAAGAUGCUUAUUACAGAGCAAGGGCUGGUGAAGCUGCUAACUUUUGUGCACUUAUCUUAGCCUACUGUAAUAAGACAGUAGGUGAGUUAG	>MT358637.1_108_miRNA_1	UUAUUACAGAGCAAGGGCUGGU	>MT358637.1_108_miRNA_2	ACUUAUCUUAGCCUACUGUAAU
24	>MT358637.1_109	GGCUGGUGAAGCUGCUAACUUUUGUGCACUUAUCUUAGCCUACUGUAAUAAGACAGUAGGUGAGUUAGGUGAUGUUAGAGAAACAAUGAGUUACUUGUUUCAACAUGCC	>MT358637.1_109_miRNA_1	UUGUGCACUUAUCUUAGCCUAC	>MT358637.1_109_miRNA_2	UAGGUGAGUUAGGUGAUGUUAG
25	>MT358637.1_110	GGUGAUGUUAGAGAAACAAUGAGUUACUUGUUUCAACAUGCCAAUUUAGAUUCUUGCAAAAGAGUCUUGAACGUGGUGUGUAAAACUUGUGGACAACAGCAGACAACC	>MT358637.1_110_miRNA_1	CAAUGAGUUACUUGUUUCAACA	>MT358637.1_110_miRNA_2	UUUCAACAUGCCAAUUUAGAUU
26	>MT358637.1_111	GGUGUGUAAAACUUGUGGACAACAGCAGACAACCCUUAAGGGUGUAGAAGCUGUUAUGUACAUGGGCACACU	>MT358637.1_111_miRNA_1	GACAACAGCAGACAACCCUUAA	>MT358637.1_111_miRNA_2	UAGAAGCUGUUAUGUACAUGGG
27	>MT358637.1_112	GGGUGUAGAAGCUGUUAUGUACAUGGGCACACUUUCUUAUGAACAAUUUAAGAAAGGUGUUCAGAUACCUUGUACGUGUGGUAAACAAGCUACAAAAUAUCU	>MT358637.1_112_miRNA_1	UAUGUACAUGGGCACACUUUCU	>MT358637.1_112_miRNA_2	AGGUGUUCAGAUACCUUGUACG
28	>MT358637.1_124	AGCUUAAAGUUACAUUUUUCCCUGACUUAAAUGGUGAUGUGGUGGCUAUUGAUUAUAAACACUACACACCCUCUUUUAAGAAAGGAGCUAAAUUGUUACAUAAACCU	>MT358637.1_124_miRNA_1	UGACUUAAAUGGUGAUGUGGUG	>MT358637.1_124_miRNA_2	ACUACACACCCUCUUUUAAGAA
29	>MT358637.1_137	AAGUACAAAUUCUAGAAUUAAAGCAUCUAUGCCGACUACUAUAGCAAAGAAUACUGUUAAGAGUGUCGGUAAAUUUUGUCUAGAGGCUUCAUUU	>MT358637.1_137_miRNA_1	UCUAUGCCGACUACUAUAGCAA	>MT358637.1_137_miRNA_2	GUCGGUAAAUUUUGUCUAGAGG
30	>MT358637.1_149	UAUGGAAAAGUUAUGUGCAUGUUGUAGACGGUUGUAAUUCAUCAACUUGUAUGAUGUGUUACAAACGUAAUAGAGCAACAAGAGUCGAAUGUACAACUAUUGUUAAUG	>MT358637.1_149_miRNA_1	UGUUGUAGACGGUUGUAAUUCA	>MT358637.1_149_miRNA_2	UGUUACAAACGUAAUAGAGCAA
31	>MT358637.1_153	CUGGUAGUACAUUUAUUAGUGAUGAAGUUGCGAGAGACUUGUCACUACAGUUUAAAAGACCAAUAAAUCCUACUGACCAGUCUUCUUACAUCGUUGAUAGUGUUACAG	>MT358637.1_153_miRNA_1	GACUUGUCACUACAGUUUAAAA	>MT358637.1_153_miRNA_2	AAUCCUACUGACCAGUCUUCUU
32	>MT358637.1_154	AGUCUUCUUACAUCGUUGAUAGUGUUACAGUGAAGAAUGGUUCCAUCCAUCUUUACUUUGAUAAAGCUGGUCAAAAGACU	>MT358637.1_154_miRNA_1	UUGAUAGUGUUACAGUGAAGAA	>MT358637.1_154_miRNA_2	UCUUUACUUUGAUAAAGCUGGU
33	>MT358637.1_155	GUCUUCUUACAUCGUUGAUAGUGUUACAGUGAAGAAUGGUUCCAUCCAUCUUUACUUUGAUAAAGCUGGUCAAAAGACUUAUGAAAGAC	>MT358637.1_155_miRNA_1	UUGAUAGUGUUACAGUGAAGAA	>MT358637.1_155_miRNA_2	UCUUUACUUUGAUAAAGCUGGU
34	>MT358637.1_175	GAUUGCUGCAGUCAUAACAAGAGAAGUGGGUUUUGUCGUGCCUGGUUUGCCUGGCACGAUAUUACGCACAACUAAUGGUGACUUUUUGCAUUUC	>MT358637.1_175_miRNA_1	UGCCUGGUUUGCCUGGCACGAU	>MT358637.1_175_miRNA_2	CACGAUAUUACGCACAACUAAU
35	>MT358637.1_181	AAGGUUCUGUUGCUUAUGAAAGUUUACGCCCUGACACACGUUAUGUGCUCAUGGAUGGCUCUAUUAUUCAAUUUCCUAACACCUACCUU	>MT358637.1_181_miRNA_1	ACACACGUUAUGUGCUCAUGGA	>MT358637.1_181_miRNA_2	UGCUCAUGGAUGGCUCUAUUAU
36	>MT358637.1_187	UCUUUACCAGGAGUUUUCUGUGGUGUAGAUGCUGUAAAUUUACUUACUAAUAUGUUUACACCACUAAUUCAACCUAUUGGUGCUUUGGA	>MT358637.1_187_miRNA_1	CAGGAGUUUUCUGUGGUGUAGA	>MT358637.1_187_miRNA_2	UAAUAUGUUUACACCACUAAUU
37	>MT358637.1_188	UUACCAGGAGUUUUCUGUGGUGUAGAUGCUGUAAAUUUACUUACUAAUAUGUUUACACCACUAAUUCAACCUAUUGGUGCUUUGGACAUAUCAGCAUCUAUAGUAGCUGGUGG	>MT358637.1_188_miRNA_1	UAAUAUGUUUACACCACUAAUU	>MT358637.1_188_miRNA_2	UAUCAGCAUCUAUAGUAGCUGG
38	>MT358637.1_195	UUUGUUAAAUAAAGAAAUGUAUCUAAAGUUGCGUAGUGAUGUGCUAUUACCUCUUACGCAAUAUAAUAGAUACUUAGCUCUUUAUAAUAAGUACAAG	>MT358637.1_195_miRNA_1	AUGUAUCUAAAGUUGCGUAGUG	>MT358637.1_195_miRNA_2	UUACGCAAUAUAAUAGAUACUU
39	>MT358637.1_201	CUCUGAAGACAUGCUUAACCCUAAUUAUGAAGAUUUACUCAUUCGUAAGUCUAAUCAUAAUUUCUUGGUACAGGCUGGUAAUGUUCAACUCAGGG	>MT358637.1_201_miRNA_1	CUUAACCCUAAUUAUGAAGAUU	>MT358637.1_201_miRNA_2	AAGUCUAAUCAUAAUUUCUUGG
40	>MT358637.1_206	UCACCAUCUGGUGUUUACCAAUGUGCUAUGAGGCCCAAUUUCACUAUUAAGGGUUCAUUCCUUAAUGGUUCAUGUGGUAGUGUUGGUUUUAACAUAGAUUAUGA	>MT358637.1_206_miRNA_1	UUAAGGGUUCAUUCCUUAAUGG	>MT358637.1_206_miRNA_2	UUAAUGGUUCAUGUGGUAGUGU
41	>MT358637.1_207	GGUUCAUUCCUUAAUGGUUCAUGUGGUAGUGUUGGUUUUAACAUAGAUUAUGACUGUGUCUCUUUUUGUUACAUGCACCAUAUGGAAUUACCAACUGGAGUUCAUGCU	>MT358637.1_207_miRNA_1	UAACAUAGAUUAUGACUGUGUC	>MT358637.1_207_miRNA_2	UGCACCAUAUGGAAUUACCAAC
42	>MT358637.1_213	UUAGAUAUGUGUGCUUCAUUAAAAGAAUUACUGCAAAAUGGUAUGAAUGGACGUACCAUAUUGGGUAGUGCUUUAUUAGAAGAUGAAUUUACACCUUUUGA	>MT358637.1_213_miRNA_1	AAAAGAAUUACUGCAAAAUGGU	>MT358637.1_213_miRNA_2	UACCAUAUUGGGUAGUGCUUUA
43	>MT358637.1_219	CUGCUAGUUGGGUGAUGCGUAUUAUGACAUGGUUGGAUAUGGUUGAUACUAGUUUGUCUGGUUUUAAGCUAAAAGACUGUGUUAUGUAUGCAUCAGCUGUAG	>MT358637.1_219_miRNA_1	AUACUAGUUUGUCUGGUUUUAA	>MT358637.1_219_miRNA_2	UGUGUUAUGUAUGCAUCAGCUG
44	>MT358637.1_226	UUAUGUGUGUUGAGUAUUGCCCUAUUUUCUUCAUAACUGGUAAUACACUUCAGUGUAUAAUGCUAGUUUAUUGUUUCUUAGGCUAUUUUUGUACUUGUUACUUUGG	>MT358637.1_226_miRNA_1	UAAUACACUUCAGUGUAUAAUG	>MT358637.1_226_miRNA_2	AAUGCUAGUUUAUUGUUUCUUA
45	>MT358637.1_236	AAGCUAUAGCCUCAGAGUUUAGUUCCCUUCCAUCAUAUGCAGCUUUUGCUACUGCUCAAGAAGCUUAUGAGCAGGCUGUUGCUAAUGGUGAUUCUGAAGUUGUUCUU	>MT358637.1_236_miRNA_1	AUAUGCAGCUUUUGCUACUGCU	>MT358637.1_236_miRNA_2	AGGCUGUUGCUAAUGGUGAUUC
46	>MT358637.1_243	CAUAUAAAAAUACGUGUGAUGGUACAACAUUUACUUAUGCAUCAGCAUUGUGGGAAAUCCAACAGGUUGUAGAUGCAGAUAGUAAAAUUGUUCAACUUAGUGAAAUUAGUAUG	>MT358637.1_243_miRNA_1	ACAUUUACUUAUGCAUCAGCAU	>MT358637.1_243_miRNA_2	UAGAUGCAGAUAGUAAAAUUGU
47	>MT358637.1_256	UGGUACUGGUCAGGCAAUAACAGUUACACCGGAAGCCAAUAUGGAUCAAGAAUCCUUUGGUGGUGCAUCGUGUUGUCUGUACUGCCGUUGCCACAUAGAUCAUCCA	>MT358637.1_256_miRNA_1	UAUGGAUCAAGAAUCCUUUGGU	>MT358637.1_256_miRNA_2	UUUGGUGGUGCAUCGUGUUGUC
48	>MT358637.1_261	GGCUGUAGUUGUGAUCAACUCCGCGAACCCAUGCUUCAGUCAGCUGAUGCACAAUCGUUUUUAAACGGGUUUGCGGUGUAAGUGCAGCC	>MT358637.1_261_miRNA_1	UCCGCGAACCCAUGCUUCAGUC	>MT358637.1_261_miRNA_2	GGGUUUGCGGUGUAAGUGCAGC
49	>MT358637.1_287	UUACUUGUGUAUGCUGCUGACCCUGCUAUGCACGCUGCUUCUGGUAAUCUAUUACUAGAUAAACGCACUACGUGCUUUUCAGUAGCUGCACUUACUAA	>MT358637.1_287_miRNA_1	CUUCUGGUAAUCUAUUACUAGA	>MT358637.1_287_miRNA_2	UACGUGCUUUUCAGUAGCUGCA
50	>MT358637.1_292	AGUUGAAGUUGUUGAUAAGUACUUUGAUUGUUACGAUGGUGGCUGUAUUAAUGCUAACCAAGUCAUCGUCAACAACCUAGACAAAUCAGCUGGUUUUCCAUU	>MT358637.1_292_miRNA_1	UUGAUUGUUACGAUGGUGGCUG	>MT358637.1_292_miRNA_2	CAAGUCAUCGUCAACAACCUAG
51	>MT358637.1_316	GAGUUUUAUGAGGCUAUGUACACACCGCAUACAGUCUUACAGGCUGUUGGGGCUUGUGUUCUUUGCAAUUCACAGACUU	>MT358637.1_316_miRNA_1	UACAGUCUUACAGGCUGUUGGG	>MT358637.1_316_miRNA_2	UGUUGGGGCUUGUGUUCUUUGC
52	>MT358637.1_319	GUUACGACCAUGUCAUAUCAACAUCACAUAAAUUAGUCUUGUCUGUUAAUCCGUAUGUUUGCAAUGCUCCAGGUUGUGAUGUCACAGAUGUGAC	>MT358637.1_319_miRNA_1	CAACAUCACAUAAAUUAGUCUU	>MT358637.1_319_miRNA_2	AAUGCUCCAGGUUGUGAUGUCA
53	>MT358637.1_320	AUGUUUGCAAUGCUCCAGGUUGUGAUGUCACAGAUGUGACUCAACUUUACUUAGGAGGUAUGAGCUAUUAUUGUAAAUCACAUAAACCACCCAUUAGUUUUCCAU	>MT358637.1_320_miRNA_1	UGCAAUGCUCCAGGUUGUGAUG	>MT358637.1_320_miRNA_2	ACUCAACUUUACUUAGGAGGUA
54	>MT358637.1_324	UUUUGCAGCAGAAACGCUCAAAGCUACUGAGGAGACAUUUAAACUGUCUUAUGGUAUUGCUACUGUACGUGAAGUGCUGUCUGA	>MT358637.1_324_miRNA_1	AGAAACGCUCAAAGCUACUGAG	>MT358637.1_324_miRNA_2	UCUUAUGGUAUUGCUACUGUAC
55	>MT358637.1_328	AGGUGACUAUGGUGAUGCUGUUGUUUACCGAGGUACAACAACUUACAAAUUAAAUGUUGGUGAUUAUUUUGUGCUGACAUCACAUACAGUAAUGCCAUUAAGUGCACCU	>MT358637.1_328_miRNA_1	GUGACUAUGGUGAUGCUGUUGU	>MT358637.1_328_miRNA_2	UACAGUAAUGCCAUUAAGUGCA
56	>MT358637.1_331	GGUUGGUAUGCAAAAGUAUUCUACACUCCAGGGACCACCUGGUACUGGUAAGAGUCAUUUUGCUAUUGGCCUAGCU	>MT358637.1_331_miRNA_1	UAUGCAAAAGUAUUCUACACUC	>MT358637.1_331_miRNA_2	UGGUAAGAGUCAUUUUGCUAUU
57	>MT358637.1_333	UCUGCUCGCAUAGUGUAUACAGCUUGCUCUCAUGCCGCUGUUGAUGCACUAUGUGAGAAGG	>MT358637.1_333_miRNA_1	UGCUCGCAUAGUGUAUACAGCU	>MT358637.1_333_miRNA_2	UGUUGAUGCACUAUGUGAGAAG
58	>MT358637.1_338	AAUUUCAAUGGCCACAAAUUAUGAUUUGAGUGUUGUCAAUGCCAGAUUACGUGCUAAGCACUAUGUGUACAUUGGCGACCCUGCUCAAUUACCUGCACCACGCACAUU	>MT358637.1_338_miRNA_1	UGAGUGUUGUCAAUGCCAGAUU	>MT358637.1_338_miRNA_2	AUGUGUACAUUGGCGACCCUGC
59	>MT358637.1_343	GGAACUUGUCGGCGUUGUCCUGCUGAAAUUGUUGACACUGUGAGUGCUUUGGUUUAUGAUAAUAAGCUUAAAGCACAUAAAGACAAAUCAGCUCAAUGCUUUAAAAUGUUUU	>MT358637.1_343_miRNA_1	CGGCGUUGUCCUGCUGAAAUUG	>MT358637.1_343_miRNA_2	UUAAAGCACAUAAAGACAAAUC
60	>MT358637.1_366	AUCUCUCUGACAGAGUCGUAUUUGUCUUAUGGGCACAUGGCUUUGAGUUGACAUCUAUGAAGUAUUUUGUGAAAAUAGGACCUGAGCGCACCUGUUGUCUAUGUGAU	>MT358637.1_366_miRNA_1	AGAGUCGUAUUUGUCUUAUGGG	>MT358637.1_366_miRNA_2	AAAUAGGACCUGAGCGCACCUG
61	>MT358637.1_369	ACUUAUGCCUGUUGGCAUCAUUCUAUUGGAUUUGAUUACGUCUAUAAUCCGUUUAUGAUUGAUGUUCAACAAUGGGGUUUUACAGGU	>MT358637.1_369_miRNA_1	UGUUGGCAUCAUUCUAUUGGAU	>MT358637.1_369_miRNA_2	AAUCCGUUUAUGAUUGAUGUUC
62	>MT358637.1_370	UUAUGAUUGAUGUUCAACAAUGGGGUUUUACAGGUAACCUACAAAGCAACCAUGAUCUGUAUUGUCAAGUCCAUGGUAAUGCACAUGUAGCUAGUUGUGAUGCAAUCAUGA	>MT358637.1_370_miRNA_1	UCAACAAUGGGGUUUUACAGGU	>MT358637.1_370_miRNA_2	UCCAUGGUAAUGCACAUGUAGC
63	>MT358637.1_373	AAUUGGUGAUGAACUGAAGAUUAAUGCGGCUUGUAGAAAGGUUCAACACAUGGUUGUUAAAGCUGCAUUAUUAGCAGACAAAUUCCCAGUU	>MT358637.1_373_miRNA_1	UUCAACACAUGGUUGUUAAAGC	>MT358637.1_373_miRNA_2	UUAAAGCUGCAUUAUUAGCAGA
64	>MT358637.1_374	UGCAUUAUUAGCAGACAAAUUCCCAGUUCUUCACGACAUUGGUAACCCUAAAGCUAUUAAGUGUGUACCUCAAGCUGAUGUAGAAUGGAAGUUCUAUGAUGCA	>MT358637.1_374_miRNA_1	AAUUCCCAGUUCUUCACGACAU	>MT358637.1_374_miRNA_2	AUGUAGAAUGGAAGUUCUAUGA
65	>MT358637.1_383	CUCAUGGAAAACAAGUAGUGUCAGAUAUAGAUUAUGUACCACUAAAGUCUGCUACGUGUAUAACACGUUGCAAUUUAGGUGGUGCUGUCUGUAGACAUCAUGCUAAUGAG	>MT358637.1_383_miRNA_1	UAUGUACCACUAAAGUCUGCUA	>MT358637.1_383_miRNA_2	UUGCAAUUUAGGUGGUGCUGUC
66	>MT358637.1_394	UGGUAGAGUUGAUGGUCAAGUAGACUUAUUUAGAAAUGCCCGUAAUGGUGUUCUUAUUACAGAAGGUAGUGUUAAAGGUUUACAACCAUCUGUAGGUCCCA	>MT358637.1_394_miRNA_1	GUAAUGGUGUUCUUAUUACAGA	>MT358637.1_394_miRNA_2	GUGUUAAAGGUUUACAACCAUC
67	>MT358637.1_399	GAUUUCUUAGAAUUAGCUAUGGAUGAAUUCAUUGAACGGUAUAAAUUAGAAGGCUAUGCCUUCGAACAUAUCGUUUAUGGAGAUUUUAGUCAUAGUCAGUUAGGUGGUU	>MT358637.1_399_miRNA_1	UAUGGAUGAAUUCAUUGAACGG	>MT358637.1_399_miRNA_2	UUAGUCAUAGUCAGUUAGGUGG
68	>MT358637.1_408	GCUGUACCCUAUAAUAUGAGAGUUAUACAUUUUGGUGCUGGUUCUGAUAAAGGAGUUGCACCAGGUACAGCUGUUUUAAGACAGU	>MT358637.1_408_miRNA_1	UAUAAUAUGAGAGUUAUACAUU	>MT358637.1_408_miRNA_2	UGCACCAGGUACAGCUGUUUUA
69	>MT358637.1_412	UCUUAAUGACUUUGUCUCUGAUGCAGAUUCAACUUUGAUUGGUGAUUGUGCAACUGUACAUACAGCUAAUAAAUGGGAUCUCAUUAUUAGUGAUAUGUACGACCCUAAGA	>MT358637.1_412_miRNA_1	UGACUUUGUCUCUGAUGCAGAU	>MT358637.1_412_miRNA_2	ACAGCUAAUAAAUGGGAUCUCA
70	>MT358637.1_418	UUCGCAUGGUGGACAGCCUUUGUUACUAAUGUGAAUGCGUCAUCAUCUGAAGCAUUUUUAAUUGGAUGUAAUUAUCUUGGCAAACCACGCGAA	>MT358637.1_418_miRNA_1	CUUUGUUACUAAUGUGAAUGCG	>MT358637.1_418_miRNA_2	AAGCAUUUUUAAUUGGAUGUAA
71	>MT358637.1_420	AAAUCCAAUUCAGUUGUCUUCCUAUUCUUUAUUUGACAUGAGUAAAUUUCCCCUUAAAUUAAGGGGUACUGCUGUUAUGUCUUUAAAAGAAGGUCAAAUCAAUGAUAUGAUUU	>MT358637.1_420_miRNA_1	UAAAUUAAGGGGUACUGCUGUU	>MT358637.1_420_miRNA_2	GUACUGCUGUUAUGUCUUUAAA
72	>MT358637.1_427	CAGGACUUGUUCUUACCUUUCUUUUCCAAUGUUACUUGGUUCCAUGCUAUACAUGUCUCUGGGACCAAUGGUACUAAGAGGUUUGAUAACCCUG	>MT358637.1_427_miRNA_1	UUUCCAAUGUUACUUGGUUCCA	>MT358637.1_427_miRNA_2	UCUGGGACCAAUGGUACUAAGA
73	>MT358637.1_445	UCAUUUGUAAUUAGAGGUGAUGAAGUCAGACAAAUCGCUCCAGGGCAAACUGGAAAGAUUGCUGAUUAUAAUUAUAAAUUACCAGAUGA	>MT358637.1_445_miRNA_1	AUGAAGUCAGACAAAUCGCUCC	>MT358637.1_445_miRNA_2	AAGAUUGCUGAUUAUAAUUAUA
74	>MT358637.1_447	GGUGGUAAUUAUAAUUACCUGUAUAGAUUGUUUAGGAAGUCUAAUCUCAAACCUUUUGAGAGAGAUAUUUCAACUGAAAUCUAUCAGGCCGGUAGCACACC	>MT358637.1_447_miRNA_1	AGAUUGUUUAGGAAGUCUAAUC	>MT358637.1_447_miRNA_2	GAGAUAUUUCAACUGAAAUCUA
75	>MT358637.1_458	CAUGUUCUUUUGGUGGUGUCAGUGUUAUAACACCAGGAACAAAUACUUCUAACCAGGUUGCUGUUCUUUAUCAGGGUGUUAACUGCACAGAAGUCCCUGUUGCUAUUCAUG	>MT358637.1_458_miRNA_1	UUAUAACACCAGGAACAAAUAC	>MT358637.1_458_miRNA_2	UUAACUGCACAGAAGUCCCUGU
76	>MT358637.1_462	AGUUAUCAGACUCAGACUAAUUCUCCUCGGCGGGCACGUAGUGUAGCUAGUCAAUCCAUCAUUGCCUACACUAUGUCACUUGGUGCAGAAAAUUCAGUUGCUUACUCUAAUAACU	>MT358637.1_462_miRNA_1	UCGGCGGGCACGUAGUGUAGCU	>MT358637.1_462_miRNA_2	UACACUAUGUCACUUGGUGCAG
77	>MT358637.1_480	AGUUGAGGCUGAAGUGCAAAUUGAUAGGUUGAUCACAGGCAGACUUCAAAGUUUGCAGACAUAUGUGACUCAACAAUUAAUUAGAGCUGCAGAAAUCAGAGCUUCUGCU	>MT358637.1_480_miRNA_1	ACAGGCAGACUUCAAAGUUUGC	>MT358637.1_480_miRNA_2	UGACUCAACAAUUAAUUAGAGC
78	>MT358637.1_501	UGCAACGAUACCGAUACAAGCCUCACUCCCUUUCGGAUGGCUUAUUGUUGGCGUUGCA	>MT358637.1_501_miRNA_1	CGAUACCGAUACAAGCCUCACU	>MT358637.1_501_miRNA_2	GAUGGCUUAUUGUUGGCGUUGC
79	>MT358637.1_505	GAAGCCCCUUUUCUCUAUCUUUAUGCUUUAGUCUACUUCUUGCAGAGUAUAAACUUUGUAAGAAUAAUAAUGAGGCUUUGGCUUUGCUGGAAAUGCCGUUC	>MT358637.1_505_miRNA_1	UUGCAGAGUAUAAACUUUGUAA	>MT358637.1_505_miRNA_2	UAAGAAUAAUAAUGAGGCUUUG
80	>MT358637.1_507	CCUUACAAUAGUGUAACUUCUUCAAUUGUCAUUACUUCAGGUGAUGGCACAACAAGUCCUAUUUCUGAACAUGACUACCAGAUUGGUGGUUAUACUGAAAAAUGGG	>MT358637.1_507_miRNA_1	UAACUUCUUCAAUUGUCAUUAC	>MT358637.1_507_miRNA_2	CUAUUUCUGAACAUGACUACCA
81	>MT358637.1_508	GAUUGGUGGUUAUACUGAAAAAUGGGAAUCUGGAGUAAAAGACUGUGUUGUAUUACACAGUUACUUCACUUCAGACUAUUACCAGCUGUACUCAACUCAAUU	>MT358637.1_508_miRNA_1	GGAAUCUGGAGUAAAAGACUGU	>MT358637.1_508_miRNA_2	CAGUUACUUCACUUCAGACUAU
82	>MT358637.1_509	UGUUGUAUUACACAGUUACUUCACUUCAGACUAUUACCAGCUGUACUCAACUCAAUUGAGUACAGACACUGGUGUUGAACAUGUUACCUUCUUCAUCUACAAUA	>MT358637.1_509_miRNA_1	CUUCAGACUAUUACCAGCUGUA	>MT358637.1_509_miRNA_2	UACAGACACUGGUGUUGAACAU
83	>MT358637.1_512	AAGAACAUGUCCAAAUUCACACAAUCGACGGUUCAUCCGGAGUUGUUAAUCCAGUAAUGGAACCAAUUUAUGAUGAACCGACGACGACUACUAGCGUGCCUU	>MT358637.1_512_miRNA_1	ACGGUUCAUCCGGAGUUGUUAA	>MT358637.1_512_miRNA_2	CCAAUUUAUGAUGAACCGACGA
84	>MT358637.1_523	GAUCACCGGUGGAAUUGCUAUCGCAAUGGCUUGUCUUGUAGGCUUGAUGUGGCUCAGCUACUUCAUUGCUUCUUUCAGACUGUUUGCGCGUACGCGUUCCAUGUGGUC	>MT358637.1_523_miRNA_1	AUGUGGCUCAGCUACUUCAUUG	>MT358637.1_523_miRNA_2	UUGCGCGUACGCGUUCCAUGUG
85	>MT358637.1_524	UUCUGACCAGACCGCUUCUAGAAAGUGAACUCGUAAUCGGAGCUGUGAUCCUUCGUGGACAUCUUCGUAUUGCUGGACACCAUCUAGGACGCUGUGACAUCAAGG	>MT358637.1_524_miRNA_1	UUCUAGAAAGUGAACUCGUAAU	>MT358637.1_524_miRNA_2	CUUCGUAUUGCUGGACACCAUC
86	>MT358637.1_527	AGGACCUGCCUAAAGAAAUCACUGUUGCUACAUCACGAACGCUUUCUUAUUACAAAUUGGGAGCUUCGCAGCGUGUAGCAGGUGACUCAGGUUUU	>MT358637.1_527_miRNA_1	ACUGUUGCUACAUCACGAACGC	>MT358637.1_527_miRNA_2	GAGCUUCGCAGCGUGUAGCAGG
87	>MT358637.1_531	GGUUACUAUAGCAGAGAUAUUACUAAUUAUUAUGAGGACUUUUAAAGUUUCCAUUUGGAAUCUUGAUUACAUCAUAAACCUCAUAAUUAAAAAUUUAUCUAAGUCACUAACU	>MT358637.1_531_miRNA_1	AGUUUCCAUUUGGAAUCUUGAU	>MT358637.1_531_miRNA_2	CUCAUAAUUAAAAAUUUAUCUA
88	>MT358637.1_554	GGGCCAGAAGCUGGACUUCCCUAUGGUGCUAACAAAGACGGCAUCAUAUGGGUUGCAACUGAGGGAGCCU	>MT358637.1_554_miRNA_1	AGAAGCUGGACUUCCCUAUGGU	>MT358637.1_554_miRNA_2	CAUCAUAUGGGUUGCAACUGAG
89	>MT358637.1_557	GAACAACAUUGCCAAAAGGCUUCUACGCAGAAGGGAGCAGAGGCGGCAGUCAAGCCUCUUCUCGUUCCUCAUCACGUAGUCGCAACAGUUC	>MT358637.1_557_miRNA_1	CAUUGCCAAAAGGCUUCUACGC	>MT358637.1_557_miRNA_2	UCUACGCAGAAGGGAGCAGAGG
90	>MT358637.1_566	UGAUGAAACUCAAGCCUUACCGCAGAGACAGAAGAAACAGCAAACUGUGAUUCUUCUUCCUGCUGCAGAUUUGGAUGAUUUCUCCA	>MT358637.1_566_miRNA_1	AGAAGAAACAGCAAACUGUGAU	>MT358637.1_566_miRNA_2	UGAUUCUUCUUCCUGCUGCAGA
91	>MT358637.1_569	GCCUAAACUCAUGCAGACCACACAAGGCAGAUGGGCUAUAUAAACGUUUUCGCUUUUCCGUUUACGAUAUAUAGUCUACUCUUGUGCAGAAUGAAUUCUCGU	>MT358637.1_569_miRNA_1	CAAGGCAGAUGGGCUAUAUAAA	>MT358637.1_569_miRNA_2	UAUAGUCUACUCUUGUGCAGAA

## Sheet: Sheet5
>MT358637.1_213_miRNA_1	AAAAGAAUUACUGCAAAAUGGU
>MT358637.1_26_miRNA_2	AAACUUCAUGGCAGACGGGCGA
>MT358637.1_366_miRNA_2	AAAUAGGACCUGAGCGCACCUG
>MT358637.1_89_miRNA_1	AACUAUACAGCGUAAAUAUAAG
>MT358637.1_445_miRNA_2	AAGAUUGCUGAUUAUAAUUAUA
>MT358637.1_418_miRNA_2	AAGCAUUUUUAAUUGGAUGUAA
>MT358637.1_46_miRNA_2	AAGGAAGGUGUAGAGUUUCUUA
>MT358637.1_201_miRNA_2	AAGUCUAAUCAUAAUUUCUUGG
>MT358637.1_26_miRNA_1	AAGUGUGAUCAUUGUGGUGAAA
>MT358637.1_37_miRNA_1	AAUCAAUACUGAGUCCUCUUUA
>MT358637.1_369_miRNA_2	AAUCCGUUUAUGAUUGAUGUUC
>MT358637.1_153_miRNA_2	AAUCCUACUGACCAGUCUUCUU
>MT358637.1_226_miRNA_2	AAUGCUAGUUUAUUGUUUCUUA
>MT358637.1_319_miRNA_2	AAUGCUCCAGGUUGUGAUGUCA
>MT358637.1_374_miRNA_1	AAUUCCCAGUUCUUCACGACAU
>MT358637.1_181_miRNA_1	ACACACGUUAUGUGCUCAUGGA
>MT358637.1_412_miRNA_2	ACAGCUAAUAAAUGGGAUCUCA
>MT358637.1_480_miRNA_1	ACAGGCAGACUUCAAAGUUUGC
>MT358637.1_243_miRNA_1	ACAUUUACUUAUGCAUCAGCAU
>MT358637.1_512_miRNA_1	ACGGUUCAUCCGGAGUUGUUAA
>MT358637.1_124_miRNA_2	ACUACACACCCUCUUUUAAGAA
>MT358637.1_46_miRNA_1	ACUCAAACCCGUCCUUGAUUGG
>MT358637.1_320_miRNA_2	ACUCAACUUUACUUAGGAGGUA
>MT358637.1_527_miRNA_1	ACUGUUGCUACAUCACGAACGC
>MT358637.1_108_miRNA_2	ACUUAUCUUAGCCUACUGUAAU
>MT358637.1_324_miRNA_1	AGAAACGCUCAAAGCUACUGAG
>MT358637.1_566_miRNA_1	AGAAGAAACAGCAAACUGUGAU
>MT358637.1_554_miRNA_1	AGAAGCUGGACUUCCCUAUGGU
>MT358637.1_37_miRNA_2	AGAGGCUGCUCGUGUUGUACGA
>MT358637.1_366_miRNA_1	AGAGUCGUAUUUGUCUUAUGGG
>MT358637.1_74_miRNA_2	AGAUUCCUAAAGAGGAAGUUAA
>MT358637.1_447_miRNA_1	AGAUUGUUUAGGAAGUCUAAUC
>MT358637.1_18_miRNA_1	AGCAGUGGUGUUACCCGUGAAC
>MT358637.1_13_miRNA_2	AGCUGGUAGCAGAACUCGAAGG
>MT358637.1_16_miRNA_1	AGCUGGUGGCCAUAGUUACGGC
>MT358637.1_16_miRNA_2	AGGCGACGAGCUUGGCACUGAU
>MT358637.1_236_miRNA_2	AGGCUGUUGCUAAUGGUGAUUC
>MT358637.1_112_miRNA_2	AGGUGUUCAGAUACCUUGUACG
>MT358637.1_531_miRNA_1	AGUUUCCAUUUGGAAUCUUGAU
>MT358637.1_219_miRNA_1	AUACUAGUUUGUCUGGUUUUAA
>MT358637.1_236_miRNA_1	AUAUGCAGCUUUUGCUACUGCU
>MT358637.1_62_miRNA_2	AUGAAGAAGAAGGUGAUUGUGA
>MT358637.1_445_miRNA_1	AUGAAGUCAGACAAAUCGCUCC
>MT358637.1_13_miRNA_1	AUGCUCGAACUGCACCUCAUGG
>MT358637.1_58_miRNA_2	AUGCUGUCAUAAAAACUUUGCA
>MT358637.1_60_miRNA_1	AUGGCUACAUACUACUUAUUUG
>MT358637.1_374_miRNA_2	AUGUAGAAUGGAAGUUCUAUGA
>MT358637.1_195_miRNA_1	AUGUAUCUAAAGUUGCGUAGUG
>MT358637.1_523_miRNA_1	AUGUGGCUCAGCUACUUCAUUG
>MT358637.1_338_miRNA_2	AUGUGUACAUUGGCGACCCUGC
>MT358637.1_319_miRNA_1	CAACAUCACAUAAAUUAGUCUU
>MT358637.1_569_miRNA_1	CAAGGCAGAUGGGCUAUAUAAA
>MT358637.1_292_miRNA_2	CAAGUCAUCGUCAACAACCUAG
>MT358637.1_110_miRNA_1	CAAUGAGUUACUUGUUUCAACA
>MT358637.1_56_miRNA_1	CACCAACAAAGGUUACUUUUGG
>MT358637.1_12_miRNA_2	CACCUCAUGGUCAUGUUAUGGU
>MT358637.1_175_miRNA_2	CACGAUAUUACGCACAACUAAU
>MT358637.1_30_miRNA_2	CACGUGCUAGCGCUAACAUAGG
>MT358637.1_187_miRNA_1	CAGGAGUUUUCUGUGGUGUAGA
>MT358637.1_65_miRNA_2	CAGUGAGGACAAUCAGACAACU
>MT358637.1_508_miRNA_2	CAGUUACUUCACUUCAGACUAU
>MT358637.1_31_miRNA_1	CAUAACAAGUGUGCCUAUUGGG
>MT358637.1_554_miRNA_2	CAUCAUAUGGGUUGCAACUGAG
>MT358637.1_557_miRNA_1	CAUUGCCAAAAGGCUUCUACGC
>MT358637.1_512_miRNA_2	CCAAUUUAUGAUGAACCGACGA
>MT358637.1_501_miRNA_1	CGAUACCGAUACAAGCCUCACU
>MT358637.1_12_miRNA_1	CGGAUGCUCGAACUGCACCUCA
>MT358637.1_343_miRNA_1	CGGCGUUGUCCUGCUGAAAUUG
>MT358637.1_507_miRNA_2	CUAUUUCUGAACAUGACUACCA
>MT358637.1_531_miRNA_2	CUCAUAAUUAAAAAUUUAUCUA
>MT358637.1_58_miRNA_1	CUGCCUAUACAGUUGAACUCGG
>MT358637.1_62_miRNA_1	CUGGUGAGUUUAAAUUGGCUUC
>MT358637.1_201_miRNA_1	CUUAACCCUAAUUAUGAAGAUU
>MT358637.1_509_miRNA_1	CUUCAGACUAUUACCAGCUGUA
>MT358637.1_524_miRNA_2	CUUCGUAUUGCUGGACACCAUC
>MT358637.1_287_miRNA_1	CUUCUGGUAAUCUAUUACUAGA
>MT358637.1_418_miRNA_1	CUUUGUUACUAAUGUGAAUGCG
>MT358637.1_111_miRNA_1	GACAACAGCAGACAACCCUUAA
>MT358637.1_153_miRNA_1	GACUUGUCACUACAGUUUAAAA
>MT358637.1_447_miRNA_2	GAGAUAUUUCAACUGAAAUCUA
>MT358637.1_527_miRNA_2	GAGCUUCGCAGCGUGUAGCAGG
>MT358637.1_501_miRNA_2	GAUGGCUUAUUGUUGGCGUUGC
>MT358637.1_92_miRNA_2	GGAAGAAGCUGCUCGGUAUAUG
>MT358637.1_508_miRNA_1	GGAAUCUGGAGUAAAAGACUGU
>MT358637.1_30_miRNA_1	GGAGGCUGUGUGUUCUCUUAUG
>MT358637.1_43_miRNA_1	GGCUACUAACAAUCUAGUUGUA
>MT358637.1_261_miRNA_2	GGGUUUGCGGUGUAAGUGCAGC
>MT358637.1_70_miRNA_2	GGUGGUAGUUGUGUUUUAAGCG
>MT358637.1_394_miRNA_1	GUAAUGGUGUUCUUAUUACAGA
>MT358637.1_420_miRNA_2	GUACUGCUGUUAUGUCUUUAAA
>MT358637.1_137_miRNA_2	GUCGGUAAAUUUUGUCUAGAGG
>MT358637.1_328_miRNA_1	GUGACUAUGGUGAUGCUGUUGU
>MT358637.1_29_miRNA_2	GUGUGUUCUCUUAUGUUGGUUG
>MT358637.1_394_miRNA_2	GUGUUAAAGGUUUACAACCAUC
>MT358637.1_420_miRNA_1	UAAAUUAAGGGGUACUGCUGUU
>MT358637.1_207_miRNA_1	UAACAUAGAUUAUGACUGUGUC
>MT358637.1_507_miRNA_1	UAACUUCUUCAAUUGUCAUUAC
>MT358637.1_505_miRNA_2	UAAGAAUAAUAAUGAGGCUUUG
>MT358637.1_226_miRNA_1	UAAUACACUUCAGUGUAUAAUG
>MT358637.1_188_miRNA_1	UAAUAUGUUUACACCACUAAUU
>MT358637.1_187_miRNA_2	UACACUAUGUCACUUGGUGCAG
>MT358637.1_462_miRNA_2	UACAGACACUGGUGUUGAACAU
>MT358637.1_509_miRNA_2	UACAGUAAUGCCAUUAAGUGCA
>MT358637.1_328_miRNA_2	UACAGUCUUACAGGCUGUUGGG
>MT358637.1_316_miRNA_1	UACAUUCUUUAAGAGUUUGUGU
>MT358637.1_73_miRNA_1	UACCAUAUUGGGUAGUGCUUUA
>MT358637.1_213_miRNA_2	UACGUGCUUUUCAGUAGCUGCA
>MT358637.1_287_miRNA_2	UACUUAUUUGAUGAGUCUGGUG
>MT358637.1_60_miRNA_2	UAGAAGCUGUUAUGUACAUGGG
>MT358637.1_111_miRNA_2	UAGAUGCAGAUAGUAAAAUUGU
>MT358637.1_243_miRNA_2	UAGGUGAGUUAGGUGAUGUUAG
>MT358637.1_109_miRNA_2	UAUAAUAUGAGAGUUAUACAUU
>MT358637.1_408_miRNA_1	UAUAGUCUACUCUUGUGCAGAA
>MT358637.1_569_miRNA_2	UAUCAGCAUCUAUAGUAGCUGG
>MT358637.1_188_miRNA_2	UAUGACAAACUUGUUUCAAGCU
>MT358637.1_74_miRNA_1	UAUGCAAAAGUAUUCUACACUC
>MT358637.1_331_miRNA_1	UAUGGAUCAAGAAUCCUUUGGU
>MT358637.1_256_miRNA_1	UAUGGAUGAAUUCAUUGAACGG
>MT358637.1_399_miRNA_1	UAUGUAACACAUGGCUUAAAUU
>MT358637.1_92_miRNA_1	UAUGUACAUGGGCACACUUUCU
>MT358637.1_112_miRNA_1	UAUGUACCACUAAAGUCUGCUA
>MT358637.1_383_miRNA_1	UAUUGCCUUUGGAGGCUGUGUG
>MT358637.1_29_miRNA_1	UCAACAAUGGGGUUUUACAGGU
>MT358637.1_370_miRNA_1	UCCAUGGUAAUGCACAUGUAGC
>MT358637.1_370_miRNA_2	UCCGCGAACCCAUGCUUCAGUC
>MT358637.1_261_miRNA_1	UCGGCGGGCACGUAGUGUAGCU
>MT358637.1_462_miRNA_1	UCUACGCAGAAGGGAGCAGAGG
>MT358637.1_557_miRNA_2	UCUAUGCCGACUACUAUAGCAA
>MT358637.1_137_miRNA_1	UCUGGGACCAAUGGUACUAAGA
>MT358637.1_427_miRNA_2	UCUUAUGGUAUUGCUACUGUAC
>MT358637.1_324_miRNA_2	UCUUUACUUUGAUAAAGCUGGU
>MT358637.1_154_miRNA_2	UGACACUGUGAUAGAAGUGCAA
>MT358637.1_155_miRNA_2	UGACUCAACAAUUAAUUAGAGC
>MT358637.1_56_miRNA_2	UGACUUAAAUGGUGAUGUGGUG
>MT358637.1_480_miRNA_2	UGACUUUGUCUCUGAUGCAGAU
>MT358637.1_124_miRNA_1	UGAGUGUUGUCAAUGCCAGAUU
>MT358637.1_412_miRNA_1	UGAUUCUUCUUCCUGCUGCAGA
>MT358637.1_338_miRNA_1	UGCAAUGCUCCAGGUUGUGAUG
>MT358637.1_566_miRNA_2	UGCACCAGGUACAGCUGUUUUA
>MT358637.1_320_miRNA_1	UGCACCAUAUGGAAUUACCAAC
>MT358637.1_408_miRNA_2	UGCCUGGUUUGCCUGGCACGAU
>MT358637.1_207_miRNA_2	UGCUCAUGGAUGGCUCUAUUAU
>MT358637.1_175_miRNA_1	UGCUCGCAUAGUGUAUACAGCU
>MT358637.1_181_miRNA_2	UGGUAAGAGUCAUUUUGCUAUU
>MT358637.1_333_miRNA_1	UGUGUUAUGUAUGCAUCAGCUG
>MT358637.1_331_miRNA_2	UGUUACAAACGUAAUAGAGCAA
>MT358637.1_219_miRNA_2	UGUUGAUGCACUAUGUGAGAAG
>MT358637.1_149_miRNA_2	UGUUGGAGAAGGUUCCGAAGGU
>MT358637.1_333_miRNA_2	UGUUGGCAUCAUUCUAUUGGAU
>MT358637.1_31_miRNA_2	UGUUGGGGCUUGUGUUCUUUGC
>MT358637.1_369_miRNA_1	UGUUGGUCAACAAGACGGCAGU
>MT358637.1_316_miRNA_2	UGUUGUAGACGGUUGUAAUUCA
>MT358637.1_65_miRNA_1	UUAAAGCACAUAAAGACAAAUC
>MT358637.1_149_miRNA_1	UUAAAGCUGCAUUAUUAGCAGA
>MT358637.1_343_miRNA_2	UUAACGGAGGGGCAUACACUCG
>MT358637.1_373_miRNA_2	UUAACUGCACAGAAGUCCCUGU
>MT358637.1_18_miRNA_2	UUAAGGGUUCAUUCCUUAAUGG
>MT358637.1_458_miRNA_2	UUAAUGGUUCAUGUGGUAGUGU
>MT358637.1_206_miRNA_1	UUACAGGUGGUGUUGUUCAGUU
>MT358637.1_206_miRNA_2	UUACGCAAUAUAAUAGAUACUU
>MT358637.1_43_miRNA_2	UUAGUCAUAGUCAGUUAGGUGG
>MT358637.1_195_miRNA_2	UUAUAACACCAGGAACAAAUAC
>MT358637.1_399_miRNA_2	UUAUUACAGAGCAAGGGCUGGU
>MT358637.1_458_miRNA_1	UUCAACACAUGGUUGUUAAAGC
>MT358637.1_108_miRNA_1	UUCGCGACGUGCUCGUACGUGG
>MT358637.1_373_miRNA_1	UUCUAGAAAGUGAACUCGUAAU
>MT358637.1_8_miRNA_2	UUGAAUCUGAUGAUUACAUAGC
>MT358637.1_524_miRNA_1	UUGAUAGUGUUACAGUGAAGAA
>MT358637.1_70_miRNA_1	UUGAUUAUGGUGCUAGAUUUUA
>MT358637.1_154_miRNA_1	UUGAUUGUUACGAUGGUGGCUG
>MT358637.1_155_miRNA_1	UUGCAAUUUAGGUGGUGCUGUC
>MT358637.1_89_miRNA_2	UUGCAGAGUAUAAACUUUGUAA
>MT358637.1_292_miRNA_1	UUGCCUGUUUUACAGGUUCGCG
>MT358637.1_383_miRNA_2	UUGCGCGUACGCGUUCCAUGUG
>MT358637.1_505_miRNA_1	UUGUGCACUUAUCUUAGCCUAC
>MT358637.1_8_miRNA_1	UUGUGUAGAUACUGUUCGCACA
>MT358637.1_523_miRNA_2	UUUCAACAUGCCAAUUUAGAUU
>MT358637.1_109_miRNA_1	UUUCCAAUGUUACUUGGUUCCA
>MT358637.1_73_miRNA_2	UUUGGUGGUGCAUCGUGUUGUC
>MT358637.1_110_miRNA_2
>MT358637.1_427_miRNA_1
>MT358637.1_256_miRNA_2
