# Supplementary material for: SARS-CoV-2 putative mi-RNAs may target host immune system and cellular mechanisms to mediate pathogenesis-an in silico and in vivo study
Source: Research Square preprint supplement (doi:10.21203/rs.3.rs-6526890/v1), 2025-05-09
Supplement: Supplementary file 4 [file 86bc4a20f4d054a0bb8e6455.docx]

**Table S1: Expression of mRNA of genes responsible for antiviral immune response, innate and adaptive immune responses, lymphocytes development, coagulation proteins and fibrosis in SARS-CoV-2 (Delta variant)**

| **Gene responsible for antiviral Immune response** | | | |
| --- | --- | --- | --- |
| Gene | HC (1) | Delta Variant (2) | 1vs2 |
| IFNAR1 | 1.003± 0.098 | 0.077± 0.042 | <0.0001 |
| IFNG | 1.027± 0.271 | 0.068± 0.043 | 0.0019 |
| IFIH1 | 1.007± 0.139 | 0.453± 0.131 | 0.0037 |
| **Gene regulating Innate vs Adaptive Immunity** | | | |
| PUM1 | 1.004± 0.11 | 0.248± 0.135 | 0.0008 |
| EGR2 | 1.005± 0.115 | 0.187±0.076 | 0.0003 |
| EGR3 | 1.015± 0.212 | 0.146± 0.035 | 0.0011 |
| **Genes responsible for T and B cell development** | | | |
| IL-7 | 1.0011± 0.0582 | 0.463± 0.118 | 0.0011 |
| IL-7R | 1.001± 0.06 | 0.179± 0.068 | <0.0001 |
| CBFB | 1.005± 0.119 | 0.323± 0.079 | 0.0006 |
| FOXO1 | 1.0076± 0.152 | 0.068± 0.025 | 0.0002 |
| Bcl6 | 1.0001± 0.015 | 0.048± 0.021 | <0.0001 |
| CXCR5 | 1.002± 0.076 | 0.56± 0.176 | 0.0081 |
| IL2RG | 1.004± 0.1088 | 0.178± 0.078 | 0.0002 |
| Bcl11b | 1.022± 0.271 | 0.148± 0.063 | 0.0028 |
| Ikzf1 | 1.000± 0.02 | 0.179± 0.068 | <0.0001 |
| Ikzf2 | 1.001± 0.058 | 0.7± 0.492 | Ns |
| RUNX1 | 1.004± 0.11 | 0.426±  0.106 | 0.0014 |
| cMyb | 1.0031± 0.095 | 1.706± 0.271 | 0.0066 |
| GATA2 | 1.004± 0.106 | 0.262± 0.413 | 0.0197 |
| **Genes responsible for Neuropsychiatric manifestations** | | | |
| NOS1 | 1.007± 0.145 | 1.22±  0.047 | 0.0009 |
| NTRK1 | 1.045± 0.396 | 0.046± 0.0176 | 0.006 |
| NTRK2 | 1.036± 0.321 | 0.051± 0.013 | 0.003 |
| **Genes responsible for Thrombosis and Coagulation** | | | |
| PLG | 1.005± 0.1225 | 0.924± 0.884 | Ns |
| ADAMTS13 | 1.0007± 0.045 | 1.015± 0.565 | Ns |
| NFIC | 1.003± 0.088 | 0.099± 0.093 | 0.00013 |
| POU2f | 1.0029± 0.0929 | 0.131± 0.071 | 0.0001 |
| TPA | 1.006± 0.129 | 1.014± 0.542 | Ns |
| **Genes responsible for hyperinsulinemia and hyperglycemia** | | | |
| IGF1 | 1.0005± 0.039 | 1.398± 0.173 | 0.009 |
| IGF2R | 1.0258± 0.268 | 0.178± 0.153 | 0.0044 |
| **Genes responsible for biological clock** | | | |
| **Genes responsible for membrane blebbing** | | | |
| TBC1D10C | 1.003± 0.096 | 0.762± 0.117 | 0.0255 |
| TBC1D15 | 1.006± 0.132 | 0.141± 0.059 | 0.0002 |
| **Genes responsible for Anti-apoptosis** | | | |
| Bcl2 | 1.002± 0.087 | 0.328± 0.043 | 0.00013 |


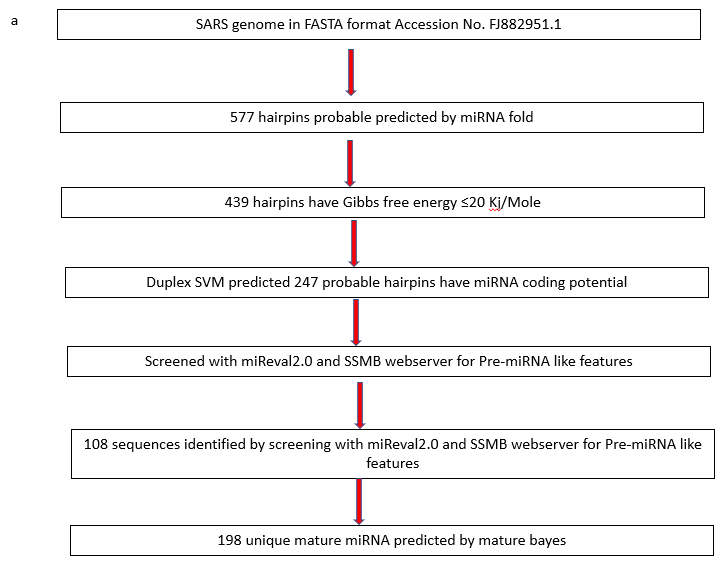


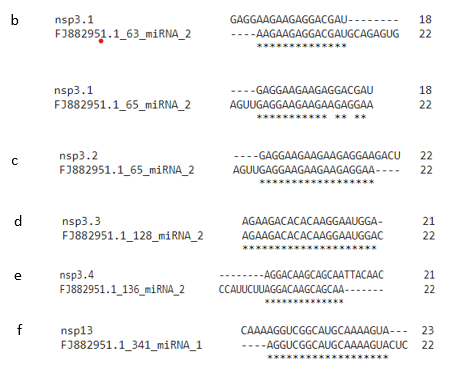


**Supplementary Figure S1: Putative miRNA prediction model for SARS-CoV:**

(a) Schematic Diagrammatic representation of potential miRNA identification of SARS-CoV Genome. Local Sequence alignment of SARS-CoV encoded miRNA with predicted miRNA (b) nsp3.1, (c) nsp3.2, (d)nsp3.3, (e) nsp3.4 and (f) nsp13.


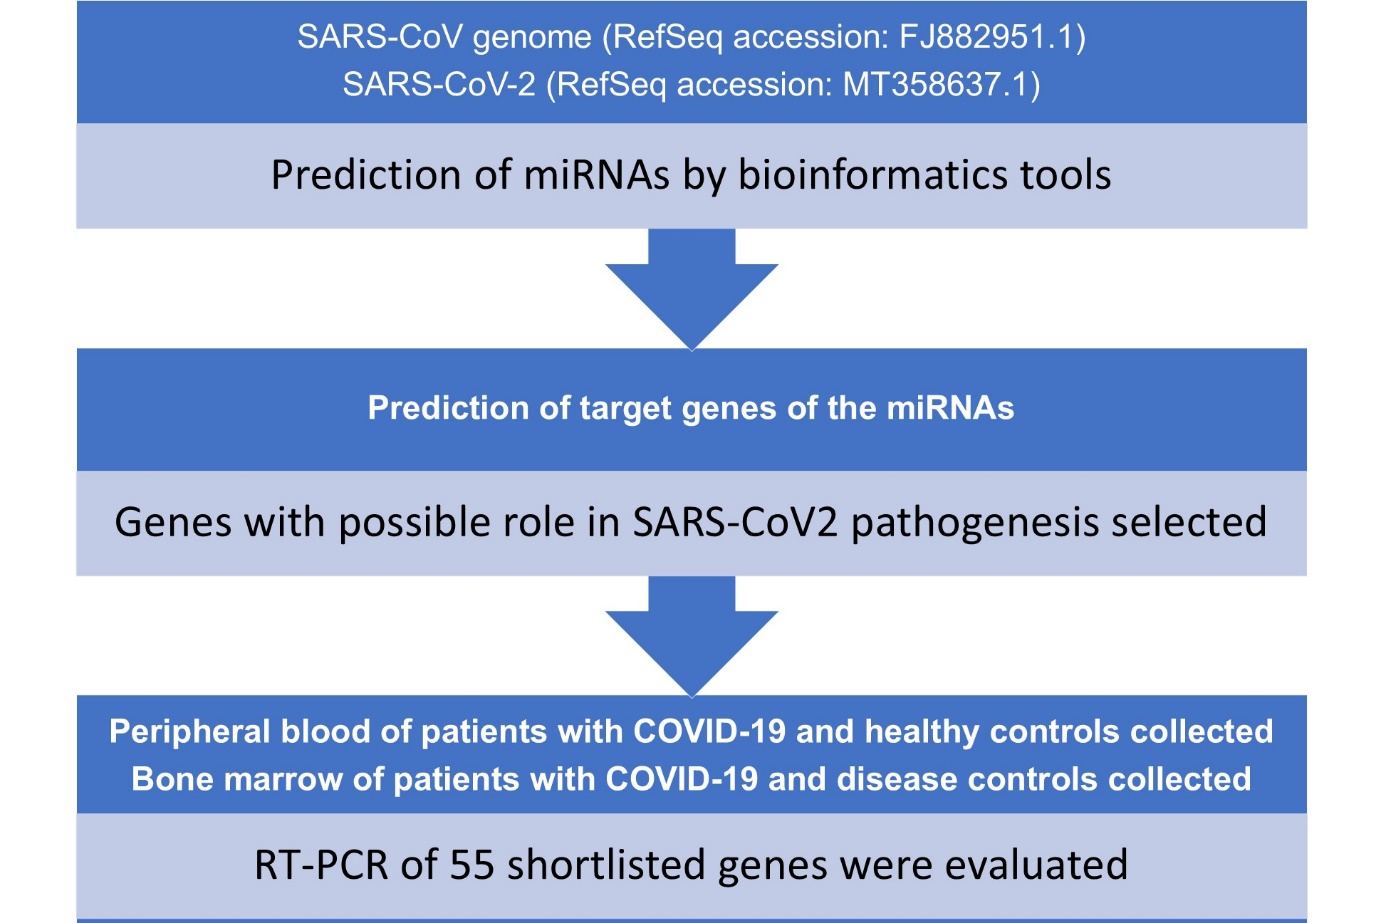


Supplementary figure S2. Study flow chart


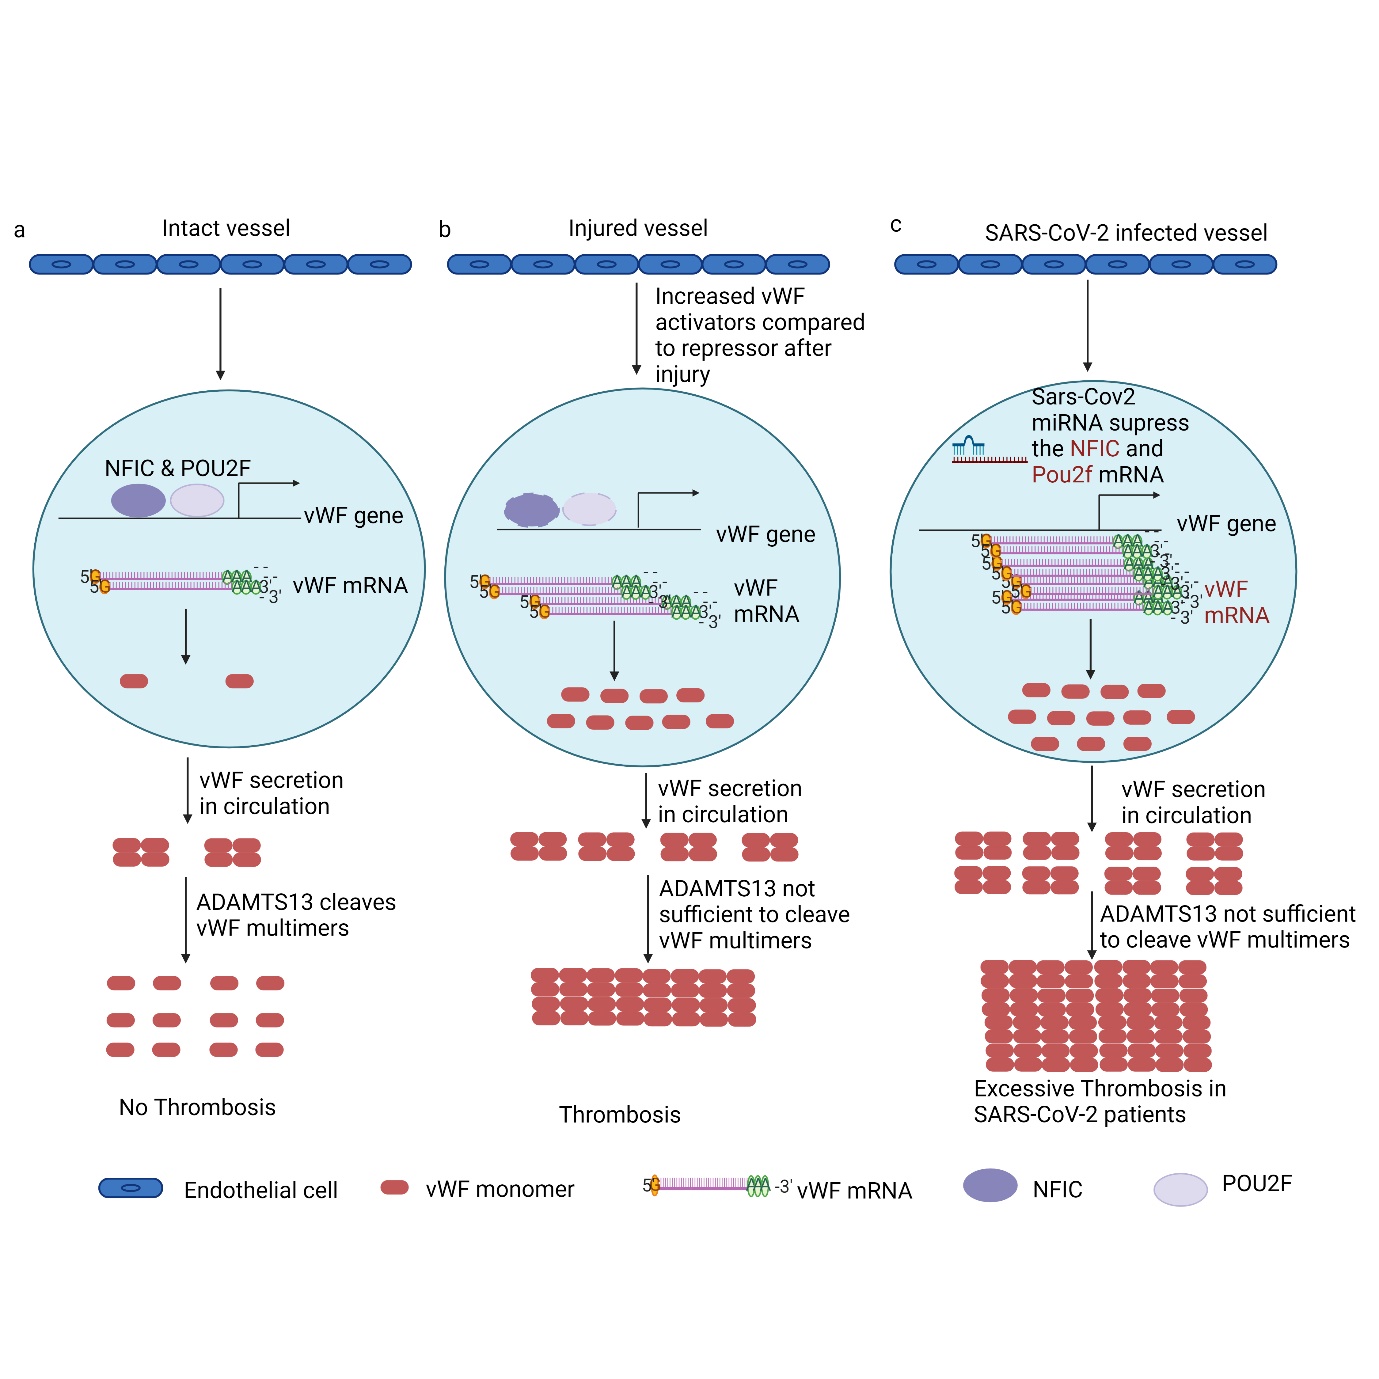


Supplementary Fig. S3: **SARS-CoV-2 may mediate thrombosis by increased secretion of vWF multimers:** Innormal healthy individuals and intact blood vessel, ADAMTS 13 inhibits thrombosis by cleaving large multimers of vWF (procoagulants) to small multimers. NFIC and POU2F1 acts as repressors of vWF. During injury, expression of vWF activators is upregulated whereas those of repressors remain unaffected this leads to excess of large multimers of vWF in circulation leading to thrombosis. In SARS-CoV-2 infected individuals, expression of NFIC and POU2F1 is highly reduced leading to increased expression of large multimers of vWF overwhelming the capacity of ADAMTS13 and leading to thrombosis.


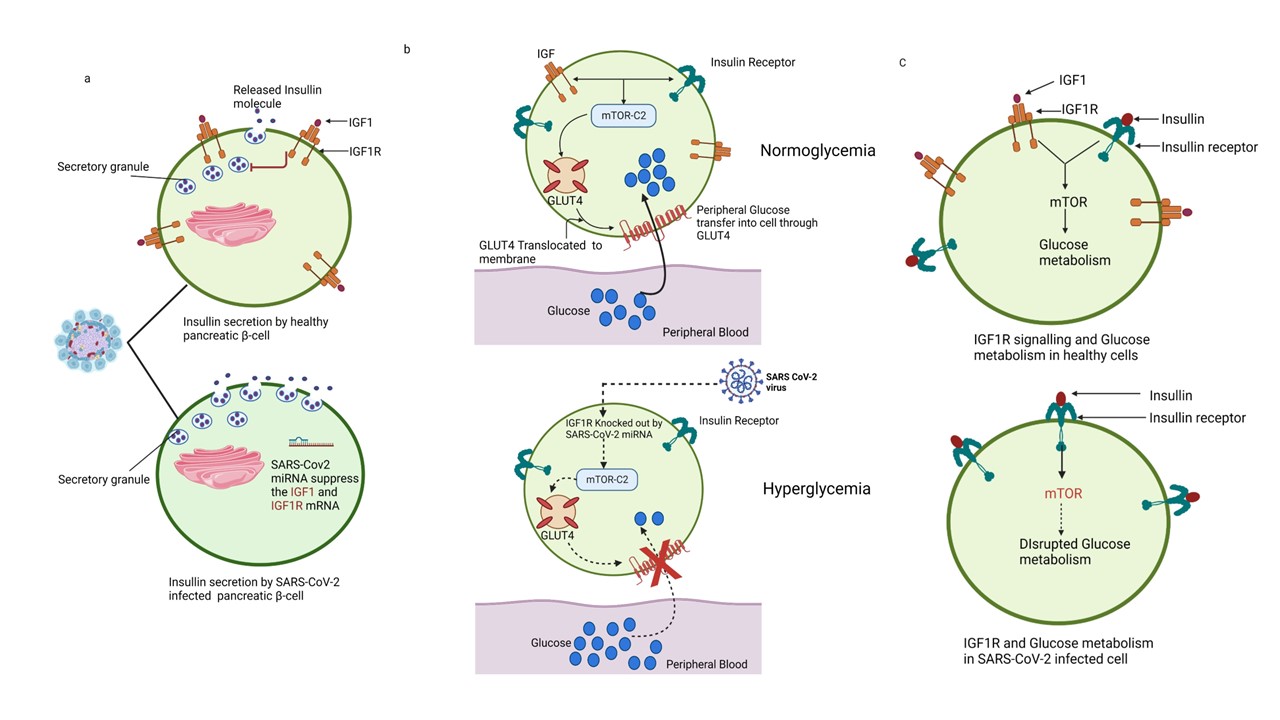


Supplementary Figure S4: **Effect of SARS-CoV-2 on hyperinsulinemia and Glucose metabolism:** IGF1/IGF1R signaling negatively regulates the release of insulin from pancreatic beta cells. In SARS-CoV-2 infected individuals IGF1R is highly decreased resulting in excessive release of insulin and hyperinsulinemia (a). Similarly reduced IGF1R signaling results in reduced translocation of Glut4 protein and result in reduced uptake of Glucose (b). Reduced mTOR signaling reduced the Glucose metabolism (c).

**Expression of genes (downregulated by putative viral miRNAs) that might be playing a role in clinical manifestations of SARS-CoV2 infection:**

**Loss of smell:**

Pax6 gene is responsible for development of olfactory epithelium which governs the smell and taste. Expression of Pax6 mRNA was significantly downregulated in severe SARS-CoV-2 infection which could possibly explain loss of smell (Table 2).

**Colitis and hyperplasia of gastric mucosa:**

RUNX3 plays crucial role in maintenance of gastric mucosa. However, SARS-CoV-2 encoded putative microRNA may target RUNX3 which could have resulted in Colitis and hyperplasia of gastric mucosa (Table 2). We observed significant downregulation of RUNX3 gene mRNA in patients with severe infection.

**Dry eye:**

PAX6 expression was downregulated in severe patients and could explain dry eye symptoms (Table 2).

**Delayed sleep phase syndrome:**

Biological clock and sleep cycle is regulated by CRY1 gene. Its expression was significantly downregulated in severe SARS-CoV-2 patients (Table 2).

**High rate of membrane blebbing:**

Ras-associated binding protein- guanosine triphosphate (Rab-GTP) causes contraction of actin and myosin leading to formation of membrane bleb. Its activity is negatively regulated by TBC1D family of proteins. TBC1D10B and TBC1D10C expression were reduced in severely infected SARS-CoV-2 patients (Table 2).

**Apoptosis:**

Anti-apoptotic gene Bcl2 expression was down regulated in severe SARS-CoV-2 patient compared to healthy controls (Table 2).

**Discussion:**

PAX6 and SOX2 are critical for olfactory epithelium development and repair. Their downregulation may explain anosmia in SARS-CoV-2 [1].

Loss of RUNX3, which maintains gastric mucosal integrity, may contribute to GI complications [2]. Additionally, TBC1D proteins suppress membrane blebbing; their downregulation (especially TBC1D15/10B/10C) during delta variant infections may facilitate viral dissemination via membrane blebs (Fig. S5) [3, 4].

Sleep disturbances in COVID-19 may be linked to downregulation of CRY1, a circadian clock regulator, likely targeted by viral miRNAs (Fig. S6) [5].

**References**

1. Guo Z, Packard A, Krolewski RC, Harris MT, Manglapus GL, Schwob JE. Expression of pax6 and sox2 in adult olfactory epithelium. J Comp Neurol. 2010 Nov 1;518(21):4395-418.
2. Brenner O, Levanon D, Negreanu V, Golubkov O, Fainaru O, Woolf E, et al. Loss of Runx3 function in leukocytes is associated with spontaneously developed colitis and gastric mucosal hyperplasia. Proc Natl Acad Sci U S A. 2004 Nov 9;101(45):16016-21.
3. Takahara Y, Maeda M, Hasegawa H, Ito S, Hyodo T, Asano E, et al. Silencing of TBC1D15 promotes RhoA activation and membrane blebbing. Mol Cell Biochem. 2014 Apr;389(1-2):9-16.
4. Blanc L, Vidal M. New insights into the function of Rab GTPases in the context of exosomal secretion. Small GTPases. 2018 Mar 4;9(1-2):95-106.
5. Parico GCG, Perez I, Fribourgh JL, Hernandez BN, Lee HW, Partch CL. The human CRY1 tail controls circadian timing by regulating its association with CLOCK:BMAL1. Proc Natl Acad Sci U S A. 2020 Nov 10;117(45):27971-9.
