# Supplementary material for: SARS-CoV-2 putative mi-RNAs may target host immune system and cellular mechanisms to mediate pathogenesis-an in silico and in vivo study
Source: Research Square preprint supplement (doi:10.21203/rs.3.rs-6526890/v1), 2025-05-09
Supplement: Supplementary file 5 [file 9f113d260c82fbf20e08b443.xlsx]

## Sheet: Sheet1
				Function 1		Function 2
	S.N.	Gene Symbol	Protein	Role	Reference	Role	Reference
1		ADAMTS13	A Disintegrin-like Metalloprotease domain with ThromboSpondin type 1 motifs	Thrombosis	Zheng XL. ADAMTS13 and von Willebrand factor in thrombotic thrombocytopenic purpura. Annu Rev Med. 2015;66:211-25. doi: 10.1146/annurev-med-061813-013241. PMID: 25587650; PMCID: PMC4599565.
2		BCL11B	B cell leukemia 11b	T cell development	Liu P, Li P, Burke S. Critical roles of Bcl11b in T-cell development and maintenance of T-cell identity. Immunol Rev. 2010 Nov;238(1):138-49. doi: 10.1111/j.1600-065X.2010.00953.x. PMID: 20969590.	Nk cell defferentiation	Holmes TD, Pandey RV, Helm EY, Schlums H, Han H, Campbell TM, Drashansky TT, Chiang S, Wu CY, Tao C, Shoukier M, Tolosa E, Von Hardenberg S, Sun M, Klemann C, Marsh RA, Lau CM, Lin Y, Sun JC, Månsson R, Cichocki F, Avram D, Bryceson YT. The transcription factor Bcl11b promotes both canonical and adaptive NK cell differentiation. Sci Immunol. 2021 Mar 12;6(57):eabc9801. doi: 10.1126/sciimmunol.abc…
3		BCL2	B-cell leukemia/lymphoma 2	apoptosis	Tsujimoto Y. Role of Bcl-2 family proteins in apoptosis: apoptosomes or mitochondria? Genes Cells. 1998 Nov;3(11):697-707. doi: 10.1046/j.1365-2443.1998.00223.x. PMID: 9990505.
4		CBFB	core binding factor beta
5		CRY1	Cryptochrome Circadian Regulator 1	Biological Clock	Parico GCG, Perez I, Fribourgh JL, Hernandez BN, Lee HW, Partch CL. The human CRY1 tail controls circadian timing by regulating its association with CLOCK:BMAL1. Proc Natl Acad Sci U S A. 2020 Nov 10;117(45):27971-27979. doi: 10.1073/pnas.1920653117. Epub 2020 Oct 26. PMID: 33106415; PMCID: PMC7668087.
6		CTLA4	cytotoxic T-lymphocyte–associated antigen 4	Immune checkpoint	Buchbinder EI, Desai A. CTLA-4 and PD-1 Pathways: Similarities, Differences, and Implications of Their Inhibition. Am J Clin Oncol. 2016 Feb;39(1):98-106. doi: 10.1097/COC.0000000000000239. PMID: 26558876; PMCID: PMC4892769.
7		CXCR5	C-X-C chemokine receptor type 5	Germinal Centre reaction	Wu BX, Zhao LD, Zhang X. CXCR4 and CXCR5 orchestrate dynamic germinal center reactions and may contribute to the pathogenesis of systemic lupus erythematosus. Cell Mol Immunol. 2019 Aug;16(8):724-726. doi: 10.1038/s41423-019-0244-y. Epub 2019 Jun 3. PMID: 31160759; PMCID: PMC6804862.
8		EGR2	Early Growth Response 2	T cell development	Omodho B, Miao T, Symonds ALJ, Singh R, Li S, Wang P. Transcription factors early growth response gene (Egr) 2 and 3 control inflammatory responses of tolerant T cells. Immun Inflamm Dis. 2018 Jun;6(2):221-233. doi: 10.1002/iid3.210. Epub 2018 Jan 3. PMID: 29314730; PMCID: PMC5946152.
9		EGR3	Early Growth Response 3	T cell development	Omodho B, Miao T, Symonds ALJ, Singh R, Li S, Wang P. Transcription factors early growth response gene (Egr) 2 and 3 control inflammatory responses of tolerant T cells. Immun Inflamm Dis. 2018 Jun;6(2):221-233. doi: 10.1002/iid3.210. Epub 2018 Jan 3. PMID: 29314730; PMCID: PMC5946152.
10		FOXA1	FOXA1 forkhead box A1	Respiratory Epithelium	Wan H, Dingle S, Xu Y, Besnard V, Kaestner KH, Ang SL, Wert S, Stahlman MT, Whitsett JA. Compensatory roles of Foxa1 and Foxa2 during lung morphogenesis. J Biol Chem. 2005 Apr 8;280(14):13809-16. doi: 10.1074/jbc.M414122200. Epub 2005 Jan 24. PMID: 15668254.
11		FOXA2	FOXA1 forkhead box A2	Respiratory Epithelium	Wan H, Dingle S, Xu Y, Besnard V, Kaestner KH, Ang SL, Wert S, Stahlman MT, Whitsett JA. Compensatory roles of Foxa1 and Foxa2 during lung morphogenesis. J Biol Chem. 2005 Apr 8;280(14):13809-16. doi: 10.1074/jbc.M414122200. Epub 2005 Jan 24. PMID: 15668254.
12		FOXJ1	Forkhead Box J1	Respiratory cilliary epithelium	Didon L, Zwick RK, Chao IW, Walters MS, Wang R, Hackett NR, Crystal RG. RFX3 modulation of FOXJ1 regulation of cilia genes in the human airway epithelium. Respir Res. 2013 Jul 3;14(1):70. doi: 10.1186/1465-9921-14-70. PMID: 23822649; PMCID: PMC3710277.
13		FOXO1	Forkhead box protein O1	B cell development	Dengler HS, Baracho GV, Omori SA, Bruckner S, Arden KC, Castrillon DH, DePinho RA, Rickert RC. Distinct functions for the transcription factor Foxo1 at various stages of B cell differentiation. Nat Immunol. 2008 Dec;9(12):1388-98. doi: 10.1038/ni.1667. Epub 2008 Nov 2. PMID: 18978794; PMCID: PMC2679692.
14		GABARG1	gamma-aminobutyric acid type A receptor subunit gamma1	sucide	A. Sequeira, F. Mamdani, C. Ernst, M. P. Vawter, W. E. Bunney, V. Lebel, S. Rehal, T. Klempan, A. Gratton, C. Benkelfat, G. A. Rouleau, N. Mechawar, G. Turecki, Global brain gene expression analysis links glutamatergic and GABAergic alterations to suicide and major depression. PLoS One 4, e6585 (2009).
15		GATA2	GATA binding protein 2	Haematopoesis	Rothenberg EV. Transcriptional control of early T and B cell developmental choices. Annu Rev Immunol. 2014;32:283-321. doi: 10.1146/annurev-immunol-032712-100024. Epub 2014 Jan 22. PMID: 24471430; PMCID: PMC3994230.
16		IFIH1	interferon induced with helicase C domain 1	antiviral response	Dias Junior AG, Sampaio NG, Rehwinkel J. A Balancing Act: MDA5 in Antiviral Immunity and Autoinflammation. Trends Microbiol. 2019 Jan;27(1):75-85. doi: 10.1016/j.tim.2018.08.007. Epub 2018 Sep 7. PMID: 30201512; PMCID: PMC6319154.
17		GATA3	GATA binding protein 3	Haematopoesis	Rothenberg EV. Transcriptional control of early T and B cell developmental choices. Annu Rev Immunol. 2014;32:283-321. doi: 10.1146/annurev-immunol-032712-100024. Epub 2014 Jan 22. PMID: 24471430; PMCID: PMC3994230.
18		IFNAR1	interferon alpha and beta receptor subunit 1	antiviral response	de Weerd NA, Samarajiwa SA, Hertzog PJ. Type I interferon receptors: biochemistry and biological functions. J Biol Chem. 2007 Jul 13;282(28):20053-7. doi: 10.1074/jbc.R700006200. Epub 2007 May 14. PMID: 17502368.
19		IFNAR2	interferon alpha and beta receptor subunit 2	antiviral response	de Weerd NA, Samarajiwa SA, Hertzog PJ. Type I interferon receptors: biochemistry and biological functions. J Biol Chem. 2007 Jul 13;282(28):20053-7. doi: 10.1074/jbc.R700006200. Epub 2007 May 14. PMID: 17502368.
20		IFNG	interferon gamma	antiviral response	Lee AJ, Ashkar AA. The Dual Nature of Type I and Type II Interferons. Front Immunol. 2018 Sep 11;9:2061. doi: 10.3389/fimmu.2018.02061. PMID: 30254639; PMCID: PMC6141705.
21		IKZF1	IKAROS family zinc finger 1	Rothenberg EV. Transcriptional control of early T and B cell developmental choices. Annu Rev Immunol. 2014;32:283-321. doi: 10.1146/annurev-immunol-032712-100024. Epub 2014 Jan 22. PMID: 24471430; PMCID: PMC3994230.	Rothenberg EV. Transcriptional control of early T and B cell developmental choices. Annu Rev Immunol. 2014;32:283-321. doi: 10.1146/annurev-immunol-032712-100024. Epub 2014 Jan 22. PMID: 24471430; PMCID: PMC3994230.
22				plasmacytoid Dendritic cell	Allman D, Dalod M, Asselin-Paturel C, Delale T, Robbins SH, Trinchieri G, Biron CA, Kastner P, Chan S. Ikaros is required for plasmacytoid dendritic cell differentiation. Blood. 2006 Dec 15;108(13):4025-34. doi: 10.1182/blood-2006-03-007757. Epub 2006 Aug 15. PMID: 16912230; PMCID: PMC1895449.
23		IKZF2	IKAROS family zinc finger 2	B cell development	Rothenberg EV. Transcriptional control of early T and B cell developmental choices. Annu Rev Immunol. 2014;32:283-321. doi: 10.1146/annurev-immunol-032712-100024. Epub 2014 Jan 22. PMID: 24471430; PMCID: PMC3994230.
24		IL24	interleukin 24	anti-inlammatory response	Zhong, Yajie et al. “Interleukin-24 Immunobiology and Its Roles in Inflammatory Diseases.” International journal of molecular sciences vol. 23,2 627. 6 Jan. 2022, doi:10.3390/ijms23020627
25		IL2RG	interleukin 2 receptor subunit gamma	T cell development	Rothenberg EV. Transcriptional control of early T and B cell developmental choices. Annu Rev Immunol. 2014;32:283-321. doi: 10.1146/annurev-immunol-032712-100024. Epub 2014 Jan 22. PMID: 24471430; PMCID: PMC3994230.
26		IL7	interleukin 7	Haematopoesis	Rothenberg EV. Transcriptional control of early T and B cell developmental choices. Annu Rev Immunol. 2014;32:283-321. doi: 10.1146/annurev-immunol-032712-100024. Epub 2014 Jan 22. PMID: 24471430; PMCID: PMC3994230.
27		IL7R	interleukin 7 receptor	Haematopoesis	Rothenberg EV. Transcriptional control of early T and B cell developmental choices. Annu Rev Immunol. 2014;32:283-321. doi: 10.1146/annurev-immunol-032712-100024. Epub 2014 Jan 22. PMID: 24471430; PMCID: PMC3994230.
28		IRF2BP2	interferon regulatory factor 2 binding protein 2	Haematopoesis	Ramalho-Oliveira R, Oliveira-Vieira B, Viola JPB. IRF2BP2: A new player in the regulation of cell homeostasis. J Leukoc Biol. 2019 Sep;106(3):717-723. doi: 10.1002/JLB.MR1218-507R. Epub 2019 Apr 25. PMID: 31022319.
29		KLF2	KLF transcription factor 2	T reg migration	Pabbisetty SK, Rabacal W, Volanakis EJ, Parekh VV, Olivares-Villagómez D, Cendron D, Boyd KL, Van Kaer L, Sebzda E. Peripheral tolerance can be modified by altering KLF2-regulated Treg migration. Proc Natl Acad Sci U S A. 2016 Aug 9;113(32):E4662-70. doi: 10.1073/pnas.1605849113. Epub 2016 Jul 26. PMID: 27462110; PMCID: PMC4987800
30		MYB	MYB proto-oncogene, transcription factor	Haematopoesis	Rothenberg EV. Transcriptional control of early T and B cell developmental choices. Annu Rev Immunol. 2014;32:283-321. doi: 10.1146/annurev-immunol-032712-100024. Epub 2014 Jan 22. PMID: 24471430; PMCID: PMC3994230.
31		NFIC	nuclear factor I C	Schizophrenia	Ahmed SSSJ, Akram Husain RS, Suresh Kumar, Ramakrishnan V. Association Between NOS1 Gene Polymorphisms and Schizophrenia in Asian and Caucasian Populations: A Meta-Analysis. Neuromolecular Med. 2017 Sep;19(2-3):452-461. doi: 10.1007/s12017-017-8460-z. Epub 2017 Aug 9. PMID: 28795310.	Psychosis	Okumura T, Okochi T, Kishi T, Ikeda M, Kitajima T, Kinoshita Y, Kawashima K, Tsunoka T, Fukuo Y, Inada T, Yamada M, Uchimura N, Iyo M, Sora I, Ozaki N, Ujike H, Iwata N. Genetic Association Analysis of NOS1 and Methamphetamine-Induced Psychosis Among Japanese. Curr Neuropharmacol. 2011 Mar;9(1):155-9. doi: 10.2174/157015911795017308. PMID: 21886582; PMCID: PMC3137172.
32		NOS1	nitric oxide synthase 1	Schizophrenia	Van Schijndel JE, Van Zweeden M, Van Loo KM, Djurovic S, Andreassen OA, Hansen T, Werge T, Nyegaard M, Sørensen KM, Nordentoft M, Mortensen PB, Mors O, Børglum AD, Del-Favero J, Norrback KF, Adolfsson R, De Hert M, Claes S, Cichon S, Rietschel M, Nöthen MM, Kallunki P, Pedersen JT, Martens GJ. Dual association of a TRKA polymorphism with schizophrenia. Psychiatr Genet. 2011 Jun;21(3):125-31. doi:…
33		NTRK1	neurotrophic receptor tyrosine kinase 1	emotional arousal	Spalek K, Coynel D, Freytag V, Hartmann F, Heck A, Milnik A, de Quervain D, Papassotiropoulos A. A common NTRK2 variant is associated with emotional arousal and brain white-matter integrity in healthy young subjects. Transl Psychiatry. 2016 Mar 15;6(3):e758. doi: 10.1038/tp.2016.20. PMID: 26978740; PMCID: PMC4872446.	psychological complication	Wang Z, Fan J, Gao K, Li Z, Yi Z, Wang L, Huang J, Yuan C, Hong W, Yu S, Fang Y. Neurotrophic tyrosine kinase receptor type 2 (NTRK2) gene associated with treatment response to mood stabilizers in patients with bipolar I disorder. J Mol Neurosci. 2013 Jun;50(2):305-10. doi: 10.1007/s12031-013-9956-0. Epub 2013 Jan 15. PMID: 23315174; PMCID: PMC3658129.
34		NTRK2	neurotrophic receptor tyrosine kinase 2	B cell development	Medvedovic J, Ebert A, Tagoh H, Busslinger M. Pax5: a master regulator of B cell development and leukemogenesis. Adv Immunol. 2011;111:179-206. doi: 10.1016/B978-0-12-385991-4.00005-2. PMID: 21970955.	B cell development	Cobaleda C, Schebesta A, Delogu A, Busslinger M. Pax5: the guardian of B cell identity and function. Nat Immunol. 2007 May;8(5):463-70. doi: 10.1038/ni1454. PMID: 17440452.
35		PAX5	paired box 5	Smell	Guo Z, Packard A, Krolewski RC, Harris MT, Manglapus GL, Schwob JE. Expression of pax6 and sox2 in adult olfactory epithelium. J Comp Neurol. 2010 Nov 1;518(21):4395-418. doi: 10.1002/cne.22463. PMID: 20852734; PMCID: PMC2940252.
36		PAX6	paired box 6	Coagulation	Chapin JC, Hajjar KA. Fibrinolysis and the control of blood coagulation. Blood Rev. 2015 Jan;29(1):17-24. doi: 10.1016/j.blre.2014.09.003. Epub 2014 Sep 16. PMID: 25294122; PMCID: PMC4314363.
37		PLG	plasminogen	vWF repressor	Schwachtgen JL, Remacle JE, Janel N, Brys R, Huylebroeck D, Meyer D, Kerbiriou-Nabias D. Oct-1 is involved in the transcriptional repression of the von willebrand factor gene promoter. Blood. 1998 Aug 15;92(4):1247-58. PMID: 9694713.
38		POU2F1/OCT1	POU class 2 homeobox 1	Innate immune response	Liu Y, Qu L, Liu Y, Roizman B, Zhou GG. PUM1 is a biphasic negative regulator of innate immunity genes by suppressing LGP2. Proc Natl Acad Sci U S A. 2017 Aug 15;114(33):E6902-E6911. doi: 10.1073/pnas.1708713114. Epub 2017 Jul 31. PMID: 28760986; PMCID: PMC5565464.
39		PUM1	pumilio RNA binding family member 1	B cell development	Niebuhr B, Kriebitzsch N, Fischer M, Behrens K, Günther T, Alawi M, Bergholz U, Müller U, Roscher S, Ziegler M, Buchholz F, Grundhoff A, Stocking C. Runx1 is essential at two stages of early murine B-cell development. Blood. 2013 Jul 18;122(3):413-23. doi: 10.1182/blood-2013-01-480244. Epub 2013 May 23. PMID: 23704093.
40		RUNX1	RUNX family transcription factor 1	lymphocyte egress	Pham TH, Okada T, Matloubian M, Lo CG, Cyster JG. S1P1 receptor signaling overrides retention mediated by G alpha i-coupled receptors to promote T cell egress. Immunity. 2008 Jan;28(1):122-33. doi: 10.1016/j.immuni.2007.11.017. Epub 2007 Dec 27. PMID: 18164221; PMCID: PMC2691390.
41		S1PR1	sphingosine-1-phosphate receptor 1	lymphocyte egress	Evrard M, Wynne-Jones E, Peng C, Kato Y, Christo SN, Fonseca R, Park SL, Burn TN, Osman M, Devi S, Chun J, Mueller SN, Kannourakis G, Berzins SP, Pellicci DG, Heath WR, Jameson SC, Mackay LK. Sphingosine 1-phosphate receptor 5 (S1PR5) regulates the peripheral retention of tissue-resident lymphocytes. J Exp Med. 2022 Jan 3;219(1):e20210116. doi: 10.1084/jem.20210116. Epub 2021 Oct 22. PMID: 346776…
42		S1PR5	sphingosine-1-phosphate receptor 5	lymphocyte egress	Evrard M, Wynne-Jones E, Peng C, Kato Y, Christo SN, Fonseca R, Park SL, Burn TN, Osman M, Devi S, Chun J, Mueller SN, Kannourakis G, Berzins SP, Pellicci DG, Heath WR, Jameson SC, Mackay LK. Sphingosine 1-phosphate receptor 5 (S1PR5) regulates the peripheral retention of tissue-resident lymphocytes. J Exp Med. 2022 Jan 3;219(1):e20210116. doi: 10.1084/jem.20210116. Epub 2021 Oct 22. PMID: 346776…
43		SOCS3	suppressor of cytokine signaling 3	cytokine storm	Low, Zheng Yao et al. “The Suppressor of Cytokine Signalling family of proteins and their potential impact on COVID-19 disease progression.” Reviews in medical virology vol. 32,3 (2022): e2300. doi:10.1002/rmv.2300
44		SOCS4	suppressor of cytokine signaling 4	cytokine storm	Low, Zheng Yao et al. “The Suppressor of Cytokine Signalling family of proteins and their potential impact on COVID-19 disease progression.” Reviews in medical virology vol. 32,3 (2022): e2300. doi:10.1002/rmv.2301
45		SOCS5	suppressor of cytokine signaling 5	cytokine storm	Low, Zheng Yao et al. “The Suppressor of Cytokine Signalling family of proteins and their potential impact on COVID-19 disease progression.” Reviews in medical virology vol. 32,3 (2022): e2300. doi:10.1002/rmv.2302
46		TBC1d10B	TBC1 domain family member 10B	membrane blebbing	L. Blanc, M. Vidal, New insights into the function of Rab GTPases in the context of exosomal secretion. Small GTPases 9, 95–106 (2018).
47		TBC1d10C	TBC1 domain family member 10C	membrane blebbing	L. Blanc, M. Vidal, New insights into the function of Rab GTPases in the context of exosomal secretion. Small GTPases 9, 95–106 (2018).
48		TPA	tissue-type plasminogen activator	Coagulation	Stewart D, Kong M, Novokhatny V, Jesmok G, Marder VJ. Distinct dose-dependent effects of plasmin and TPA on coagulation and hemorrhage. Blood. 2003 Apr 15;101(8):3002-7. doi: 10.1182/blood-2002-08-2546. Epub 2002 Nov 21. PMID: 12446443.
49		NR1H2	nuclear receptor subfamily 1 group H member 2	cytokine storm	Walcher D, Kümmel A, Kehrle B, Bach H, Grüb M, Durst R, Hombach V, Marx N. LXR activation reduces proinflammatory cytokine expression in human CD4-positive lymphocytes. Arterioscler Thromb Vasc Biol. 2006 May;26(5):1022-8. doi: 10.1161/01.ATV.0000210278.67076.8f. Epub 2006 Feb 16. PMID: 16484597.
50		NR1H3	nuclear receptor subfamily 1 group H member 3	cytokine storm	Walcher D, Kümmel A, Kehrle B, Bach H, Grüb M, Durst R, Hombach V, Marx N. LXR activation reduces proinflammatory cytokine expression in human CD4-positive lymphocytes. Arterioscler Thromb Vasc Biol. 2006 May;26(5):1022-8. doi: 10.1161/01.ATV.0000210278.67076.8f. Epub 2006 Feb 16. PMID: 16484597.
51		TBC1d15	TBC1 domain family member 15	membrane blebbing	Y. Takahara, M. Maeda, H. Hasegawa, S. Ito, T. Hyodo, E. Asano, M. Takahashi, M. Hamaguchi, T. Senga, Silencing of TBC1D15 promotes RhoA activation and membrane blebbing. Mol Cell Biochem 389, 9–16 (2014).
52		RUNX3	RUNX family transcription factor 3	Haematopoesis	Rothenberg EV. Transcriptional control of early T and B cell developmental choices. Annu Rev Immunol. 2014;32:283-321. doi: 10.1146/annurev-immunol-032712-100024. Epub 2014 Jan 22. PMID: 24471430; PMCID: PMC3994230.
				Colitis and mucosal hyperplasia	O. Brenner, D. Levanon, V. Negreanu, O. Golubkov, O. Fainaru, E. Woolf, Y. Groner, Loss of Runx3 function in leukocytes is associated with spontaneously developed colitis and gastric mucosal hyperplasia. Proc Natl Acad Sci U S A 101, 16016–16021 (2004).
				fibrosis	A. J. Affandi, T. Carvalheiro, A. Ottria, J. C. Broen, L. Bossini-Castillo, R. G. Tieland, L. van Bon, E. Chouri, M. Rossato, J. S. Mertens, S. Garcia, A. Pandit, L. M. de Kroon, R. B. Christmann, J. Martin, J. A. van Roon, T. R. Radstake, W. Marut, Low RUNX3 expression alters dendritic cell function in patients with systemic sclerosis and contributes to enhanced fibrosis. Ann Rheum Dis 78, 1249–…
